# Supplementary material for: Bacterial survival in microscopic surface wetness
Source: eLife. 2019 Oct 15;8:e48508. doi: 10.7554/eLife.48508 (PMC6824842; doi:10.7554/eLife.48508)
Supplement: Figure 2—figure supplement 3—source data 1. — M9 0.5x, M9 0.05x: distribution of droplets' concentration (for corresponding initial concentration). Raw data: concentration factor vs area [um^2] for all droplets. [file elife-48508-fig2-figsupp3-data1.xlsx]

## Sheet: m9 calibration - source data
concentration [M9 multiplier]	mean intensity
80	2407
70	7136
60	11952
50	21928
40	23932
30	17062
20	5922
10	2707
5	1689

## Sheet: m9 x2
low concentrations [M9 multiplier]	high concentrations [M9 multiplier]	droplet count
10	12.5	0
12.5	15	0
15	17.5	2
17.5	20	7
20	22.5	11
22.5	25	24
25	27.5	4
27.5	30	6
30	32.5	2
32.5	35	0
35	37.5	0
37.5	40	0

## Sheet: m9 x2 raw data
concentration [M9 multiplier]	droplet area [um^2]
21.9656	690.173
21.9269	146.783
20.857	496.127
29.1977	28.2122
21.2821	589.232
23.633	11710.6
23.3167	23.6376
28.2248	36.0238
24.0142	11265.6
21.1324	806.856
23.9814	153.197
26.8599	74.735
17.4202	92.5438
24.3059	237.75
24.5594	909.958
17.6436	21.7146
22.7693	1444.38
17.7494	49.9866
29.8227	31.043
17.8903	91.3494
21.3831	29.4783
28.3932	62.743
23.1034	653.289
24.787	115.787
24.4022	125.104
25.5998	125.271
22.7626	42.7961
23.2248	620.263
23.4683	467.019
21.7835	4632.65
29.9806	35.7968
31.1728	50.5241
23.551	9464.72
18.4372	65.4543
25.0555	136.176
27.785	123.599
31.0484	34.8532
18.2754	299.943
23.1402	930.407
24.5049	31.7358
24.6875	161.725
25.003	66.3621
24.8044	382.573
22.2003	1041.37
22.7595	25.0948
23.5337	108.43
16.8166	31.3297
23.3408	104.357
22.3138	565.165
23.1921	1073.5
24.0054	256.932
17.686	26.6356
18.7451	409.376
21.327	387.017
23.5554	38.8307
21.4477	138.481

## Sheet: m9 x20
low concentrations [M9 multiplier]	high concentrations [M9 multiplier]	droplet count
10	12.5	1
12.5	15	7
15	17.5	15
17.5	20	20
20	22.5	40
22.5	25	12
25	27.5	5
27.5	30	1
30	32.5	0
32.5	35	1
35	37.5	0
37.5	40	0

## Sheet: m9 x20 raw data
concentration [M9 multiplier]	droplet area [um^2]
20.1041	492.89
20.4151	223.763
23.9438	110.138
18.4296	91.2538
21.804	427.328
17.997	123.515
18.8	21.9176
16.1694	63.1252
20.6098	24.0915
32.6408	113.876
20.9871	338.786
19.2236	26.0026
17.94	23.351
26.5058	55.3854
20.852	19407.7
21.9249	32.7988
16.3902	177.193
13.9714	163.003
21.1428	296.372
22.507	169.477
25.5939	77.1955
15.9845	108.884
16.9554	31.7597
24.1718	61.3455
21.6891	32.5838
16.754	87.587
16.6242	20.8307
23.8591	51.4557
20.9889	53.8684
22.0648	29.0961
21.6468	34.4232
15.9333	277.835
21.6024	37.9587
27.6547	173.096
13.1672	24.5215
21.1671	176.392
24.0406	60.2825
20.1249	84.5651
24.3329	152.217
16.0534	20.0902
24.1869	55.0987
20.596	126.262
25.6113	254.567
24.5239	83.6573
15.6314	29.7411
12.0217	23.9362
20.565	2211.72
20.9041	38.7112
27.359	38.5559
21.2545	719.532
23.3752	123.563
18.7664	44.4683
22.0453	122.046
20.8869	486.297
19.6519	36.2388
17.2151	8691.45
23.0097	41.3151
21.0939	35.4266
25.3457	75.6308
20.6504	189.352
20.5553	359.33
13.7941	43.2381
12.7372	33.8499
21.4037	45.4716
24.2012	127.803
22.4201	79.8591
16.875	11198.4
20.5233	69.2287
20.6819	50.1418
20.3459	53.0682
21.9352	29.8128
21.0187	97.3573
19.3093	72.6328
14.3143	28.8214
17.9219	22.061
20.4839	23.7571
17.5891	25.6204
16.6493	38.5559
14.9738	293.04
14.0597	131.972
20.1093	23.4943
17.7231	20.9621
20.8329	27.0298
17.5767	32.3569
18.2174	63.7821
18.703	30.613
19.4243	20.8427
18.1327	24.3423
22.2972	109.087
20.3449	314.623
19.4406	21.4757
22.5486	108.215
20.0211	47.4663
18.4938	48.4696
18.3342	30.2189
17.5483	34.6502
17.3661	26.8028
17.4085	39.392
17.4643	32.3449
21.7012	86.8106
20.6644	24.3782
21.0776	32.8108
