# Supplementary material for: Bacterial survival in microscopic surface wetness
Source: eLife. 2019 Oct 15;8:e48508. doi: 10.7554/eLife.48508 (PMC6824842; doi:10.7554/eLife.48508)
Supplement: Figure 2—figure supplement 4—source data 1. — NaCl 16 mM, NaCl 40 mM: distribution of droplets' concentration (for corresponding initial concentration). Raw data: concentration [mM] vs area [um^2] for all droplets. [file elife-48508-fig2-figsupp4-data1.xlsx]

## Sheet: nacl calibration - source data
concentration (mM)	mean intensity
2000	14368
1600	13199
1200	11373
800	7299
400	3706
200	2754

## Sheet: nacl 16mM
low concentrations [mM]	high concentrations [M9 multiplier]	droplet count
200	300	4
300	400	3
400	500	11
500	600	18
600	700	38
700	800	20
800	900	12
900	1000	5
1000	1100	2
1100	1200	1

## Sheet: nacl 16mM raw data
concentration [mM]	droplet area [um^2]
858.943	204.652
949.071	79.6441
617.984	39.5234
812.286	217.456
731.245	44.7789
441.644	41.8525
717.113	98.3726
754.742	88.435
868.249	50.8107
502.244	38.3529
483.088	47.6574
NaN	137.167
239.707	25.4054
NaN	20.6038
NaN	85.449
NaN	85.9626
419.573	21.2846
779.83	68.6793
NaN	22.9448
904.952	853.594
728.438	446.953
605.663	38.8426
720.093	130.598
1020.76	364.573
NaN	75.2486
NaN	26.1817
845.079	379.707
NaN	37.2062
NaN	24.7126
608.768	88.3753
563.081	20.0066
674.822	84.2187
NaN	22.5149
533.438	35.4504
674.401	85.7714
NaN	174.469
678.348	89.7966
662.311	117.722
512.399	84.8995
741.098	24.1393
612.734	33.7305
626.15	35.4624
NaN	24.6648
776.904	209.299
829.018	277.464
817.377	795.091
741.09	526.262
667.805	156.565
428.882	21.9654
695.013	94.7057
NaN	199.074
714.926	168.987
651.685	86.3209
615.717	133.047
NaN	73.0747
611.308	77.2433
559.069	119.98
616.951	98.707
618.14	87.6825
603.208	70.6859
470.506	20.4246
841.319	133.883
636.423	100.331
564.591	66.6368
426.253	25.2501
672.157	114.712
625.728	71.2473
654.114	311.231
724.691	89.713
522.134	97.1304
633.724	70.029
676.878	295.655
235.962	22.6821
375.176	23.7809
691.266	93.3202
330.09	33.0019
306.549	164.675
758.277	61.3336
734.01	216.441
688.704	68.9182
579.68	115.274
700.012	87.7303
738.158	111.965
NaN	25.8473
902.474	253.062
770.527	114.533
599.681	99.2923
NaN	26.7909
603.249	83.0243
894.561	101.968
215.096	93.6666
597.882	92.6872
851.318	69.1929
1180.74	2035.83
811.511	100.188
859.297	43.1186
409.097	33.1094
996.511	1955.93
509.206	46.2361
689.624	36.9674
513.205	448.326
696.43	127.887
1074.15	173.55
700.019	22.7776
NaN	174.851
855.73	54.2984
680.456	59.7808
729.037	86.0462
513.618	92.9499
924.034	39.0815
773.552	299.585
503.448	110.52
408.517	24.6529
695.848	134.396
615.99	70.0529
729.659	81.376
476.767	215.175
NaN	63.3402
426.41	23.0165
588.298	91.8749
NaN	28.1167
617.851	68.7987
523.214	101.478
658.682	121.843
645.67	64.8929
NaN	26.8387
650.234	145.086
683.078	480.17
646.166	77.5897
599.042	107.39
287.996	29.1917
585.941	85.019
692.176	101.215
NaN	46.3794
475.389	20.1141

## Sheet: nacl 40mM
low concentrations [mM]	high concentrations [M9 multiplier]	droplet count
200	300	0
300	400	2
400	500	8
500	600	28
600	700	15
700	800	5
800	900	0
900	1000	1
1000	1100	0
1100	1200	2

## Sheet: nacl 40mM raw data
concentration [mM]	droplet area [um^2]
750.84	39.2845
685.445	46.5347
547.59	24.6051
585.27	105.981
610.211	109.743
637.331	47.1199
670.916	116.014
597.05	109.421
554.778	142.017
617.819	56.2453
565.928	156.505
549.86	80.8743
509.692	62.7908
524.328	39.2487
482.31	58.2281
1101.49	1252.15
472.131	44.325
497.449	41.1956
480.456	87.575
NaN	152.468
510.754	51.0615
1157.18	1250.79
532.4	94.4907
487.91	41.6853
526.003	87.3123
549.541	46.2958
517.185	69.5273
573.063	36.8001
603.826	135.352
563.628	165.75
546.425	47.2155
645.908	35.0205
531.771	126.442
611.843	55.4331
633.812	64.6063
602.99	46.5466
665.53	37.911
993.887	1714.56
660.292	49.4371
568.267	57.5831
586.659	43.8831
524.567	72.5731
605.37	104.416
737.223	475.535
736.172	243.997
392.022	37.3974
591.657	66.7801
462.124	29.1678
773.043	348.831
773.106	129.714
602.772	145.373
347.075	122.01
593.399	43.68
573.778	71.5339
632.31	123.432
548.071	55.9587
580.577	130.933
544.771	36.8121
541.509	48.4099
509.485	42.7603
425.412	34.3755
460.081	29.9442
