# Supplementary material for: Bacterial survival in microscopic surface wetness
Source: eLife. 2019 Oct 15;8:e48508. doi: 10.7554/eLife.48508 (PMC6824842; doi:10.7554/eLife.48508)
Supplement: Figure 2—source data 1. — Figure 2C: Droplet count within per mm2 of surface. Droplet count within a scale of area ranges, per mm2 of surface - mean value and standard error calculated for data groups. Raw data: Each row represents a single droplet. Droplet areas are given in μm2. 'repeat' values are the identifiers of the specific field of view. Figure 2D: Mean value and standard error of droplet area, binned by the area covered by cells within host droplet. Raw data: droplet area vs area covered by cells inside the droplet. Areas are given in μm2. [file elife-48508-fig2-data1.xlsx]

## Sheet: Figure 2C
log10(min droplet area [um^2])	1.25	1.75	2.25	2.75	3.25	3.75	4.25
log10(max droplet area [um^2])	1.75	2.25	2.75	3.25	3.75	4.25	inf
p. fluorescens
mean density [mm^-2]	1342.9	399.401	50.9255	23.4419	9.37676	1.53585	0.242502
Standard Error	45.375	36.6967	3.02183	2.40133	0.517591	0.347681	0.161668
p. putida
mean density [mm^-2]	155.525	846.98	194.325	20.8552	6.22423	1.45501	0.646673
Standard Error	17.9173	29.1935	9.43407	1.46062	0.804289	0.352348	0.302454
beads
mean density [mm^-2]	378.189	197.418	41.1586	21.9581	6.53635	1.73622	0
Standard Error	30.5644	31.5129	1.89974	2.61083	1.89768	0.741766	0

## Sheet: Figure 2D
log10(min cell area [um^2])	0	0.75	1.25	1.75	2.25
log10(max cell area [um^2])	0.75	1.25	1.75	2.25	inf
p. fluorescens
mean droplet area [um^2]	34.9759	55.5447	155.459	628.195	3915.66
Standard Error	0.169159	0.468111	3.41531	33.1869	946.756
p. putida
mean droplet area [um^2]	75.8029	131.721	322.212	1495.3	10844.3
Standard Error	0.402152	0.726739	3.9108	105.506	3554.39
beads
mean droplet area [um^2]	39.086	35.9351	85.437	483.769	2199.56
Standard Error	13.8441	2.5997	3.1637	32.8784	379.442

## Sheet: Fig 2C raw p fluorescens
droplet_area	repeat
8.3968	1
2.7648	1
9.1648	1
60.4416	1
25.3952	1
6.272	1
21.504	1
129.229	1
23.1168	1
23.8336	1
7.3472	1
47.7696	1
18.0992	1
4.6592	1
17.92	1
7.9616	1
617.293	1
15.7696	1
595.84	1
33.2544	1
30.208	1
60.1344	1
53.6576	1
6.144	1
15.7696	1
7.5776	1
69.0432	1
33.8176	1
521.907	1
3.5584	1
19.3536	1
64.256	1
64.3072	1
95.2064	1
7.9104	1
3.6864	1
27.7248	1
9.5232	1
13.5424	1
104.013	1
6.912	1
28.2624	1
39.0144	1
34.0224	1
6.9376	1
32.0256	1
21.4528	1
33.7664	1
39.7312	1
79.616	1
108.083	1
26.5216	1
5.1968	1
39.4496	1
22.528	1
14.592	1
32.8448	1
31.2576	1
9.9072	1
25.088	1
27.4176	1
6.6304	1
3.4304	1
25.7792	1
3.712	1
86.656	1
53.9904	1
27.4176	1
56.7296	1
13.44	1
33.152	1
33.9712	1
5.632	1
15.1808	1
40.8064	1
4.7872	1
33.152	1
8.2432	1
33.7152	1
103.398	1
6.3232	1
24.704	1
41.2672	1
91.7504	1
3.5584	1
75.8784	1
158.976	1
51.968	1
37.7856	1
45.4656	1
50.176	1
45.5424	1
50.56	1
34.2528	1
38.1952	1
29.696	1
38.4512	1
913.408	1
11.1104	1
6.8608	1
50.8672	1
9.728	1
35.3024	1
65.3056	1
11.52	1
44.6208	1
4.992	1
8.3456	1
31.8464	1
57.2928	1
32.4352	1
2.9952	1
69.7088	1
65.3056	1
34.7648	1
58.9568	1
45.1328	1
7.6032	1
31.1808	1
31.7952	1
32.64	1
34.8672	1
32.5888	1
35.2512	1
38.4256	1
7.8592	1
36.9408	1
3.072	1
53.376	1
27.4176	1
5.4016	1
30.9504	1
48.3072	1
31.2576	1
31.6928	1
77.9264	1
4.224	1
4.7104	1
99.5584	1
37.8624	1
193.024	1
28.8256	1
43.7248	1
4.3008	1
49.0752	1
59.4688	1
81.4592	1
15.9488	1
30.4896	1
41.7536	1
36.992	1
28.9536	1
1646.08	1
41.3184	1
42.5472	1
77.7472	1
323.507	1
81.4336	1
16.9472	1
29.2864	1
37.4784	1
35.5584	1
51.9936	1
38.5536	1
46.8736	1
8.8064	1
44.4416	1
5.4784	1
34.176	1
34.0224	1
2.6624	1
31.7952	1
105.037	1
54.9376	1
39.1168	1
54.3488	1
12.1856	1
19.2512	1
38.272	1
8.0384	1
64.6144	1
32.0256	1
161.536	1
40.7808	1
7.7056	1
1395.4	1
3.0208	1
39.3728	1
16.5632	1
75.9296	1
37.888	1
102.4	1
13.7472	1
41.6256	1
59.3664	1
5.6576	1
104.525	1
3.6352	1
40.9088	1
43.264	1
25.9584	1
70.1184	1
36.0448	1
37.7344	1
71.2192	1
70.2208	1
55.5008	1
23.5264	1
6.4768	1
4.3008	1
7.2448	1
6.144	1
5.4528	1
3.9424	1
47.488	1
18.3552	1
74.8544	1
98.3808	1
7.4752	1
39.936	1
36.352	1
26.3168	1
7.9872	1
49.6896	1
23.5264	1
44.3904	1
29.952	1
3.6864	1
73.984	1
2.7904	1
637.133	1
35.9424	1
1378.56	1
4.9408	1
45.824	1
3.8912	1
12.1856	1
4.1984	1
36.8896	1
6.7072	1
8.5504	1
6.4	1
35.9168	1
5.5808	1
24.8832	1
97.536	1
38.2976	1
28.9792	1
30.5664	1
2.9696	1
29.0816	1
31.4624	1
7.936	1
5.2992	1
26.112	1
12.9024	1
35.7376	1
5.248	1
3.456	1
34.3808	1
30.6688	1
43.8016	1
15.872	1
12.6976	1
33.6128	1
32.0512	1
11.2896	1
51.6608	1
4.6848	1
15.9488	1
21.3504	1
58.5984	1
45.1584	1
48.8448	1
5.5552	1
18.944	1
2.5856	1
30.5664	1
40.2176	1
35.8912	1
6.9376	1
39.4496	1
11.9296	1
47.3088	1
41.2672	1
1182.87	1
73.1648	1
7.2192	1
47.1552	1
465.075	1
145.459	1
7.936	1
7.7056	1
19.9168	1
4.7104	1
8.2176	1
34.4832	1
39.8592	1
5.0688	1
34.56	1
6.144	1
104.115	1
34.3552	1
43.52	1
8.6528	1
31.744	1
4.0448	1
62.5664	1
9.2672	1
38.2208	1
46.9248	1
18.176	1
78.8992	1
47.4112	1
3.2512	1
47.6672	1
12.5184	1
20.3008	1
48	1
8.2432	1
39.9872	1
32.9216	1
14.976	1
33.5616	1
35.6608	1
98.2528	1
9.2928	1
70.6048	1
13.5168	1
31.104	1
14.2592	1
5.888	1
2.7648	1
43.136	1
8.96	1
4.7104	1
157.645	1
33.9712	1
15.8464	1
26.5472	1
6.9376	1
21.12	1
33.6384	1
74.8288	1
5.5552	1
6.912	1
4.3776	1
47.3088	1
6.5536	1
20.7872	1
7.8336	1
7.3216	1
14.2592	1
83.2	1
282.65	1
360.243	1
28.16	1
8.7552	1
40.6784	1
10.88	1
32.2304	1
4.224	1
32.9984	1
9.0624	1
8.2944	1
69.1712	1
16.5632	1
555.008	1
26.1376	1
5.8112	1
43.776	1
37.9904	1
7.6288	1
53.2224	1
3.8144	1
36.3264	1
21.6576	1
7.5008	1
40.576	1
11.52	1
7.68	1
35.1232	1
30.1824	1
13.2096	1
42.7776	1
36.992	1
32.3584	1
89.9072	1
36.7616	1
3.4048	1
6.784	1
2.7648	1
5.8112	1
10.5216	1
38.3488	1
20.5568	1
18.304	1
9.1904	1
6.7072	1
6.8096	1
8.96	1
28.672	1
38.0672	1
5.9904	1
35.6352	1
19.7376	1
34.3808	1
2.7648	1
13.824	1
57.6	1
40.6016	1
52.1984	1
32.6144	1
53.9136	1
38.9632	1
25.344	1
109.389	1
38.8352	1
47.36	1
6.5024	1
3.9424	1
5.3248	1
2.7904	1
33.28	1
2.8416	1
64.9984	1
58.752	1
4.6848	1
2.7904	1
7.5264	1
8.448	1
41.2416	1
76.3392	1
44.6976	1
58.9824	1
9.7536	1
36.1984	1
42.9568	1
56.7296	1
33.0496	1
74.24	1
50.9184	1
31.2576	1
59.776	1
109.107	1
26.112	1
7.1424	1
9.0624	1
53.2736	1
6.9632	1
28.8768	1
111.565	1
2.8672	1
30.1824	1
9.1648	1
10.752	1
9.7536	1
12086.1	1
9.8816	1
36.0704	1
8.0896	1
37.12	1
35.7632	1
12.9024	1
52.736	1
52.3776	1
37.376	1
533.248	1
6.656	1
714.829	1
46.7456	1
36.864	1
87.9872	1
76.9536	1
59.9808	1
31.9488	1
36.7104	1
15.488	1
16.7936	1
51.84	1
28.2368	1
110.464	1
147.738	1
6.9632	1
9.6256	1
39.7568	1
3.7632	1
39.3984	1
37.7344	1
7.6288	1
70.6816	1
114.56	1
35.6608	1
14.8224	1
62.5152	1
7.8336	1
40.5248	1
8.4736	1
123.725	1
8.3456	1
9.728	1
45.184	1
13.2352	1
3.4304	1
6.6816	1
33.28	1
33.5104	1
3.584	1
8.32	1
27.264	1
126.566	1
39.3472	1
31.7696	1
21.4016	1
4.7872	1
32.8704	1
5.6064	1
3.4304	1
37.12	1
35.328	1
39.5264	1
31.0528	1
58.2912	1
53.376	1
47.8976	1
33.3568	1
4.0704	1
8.6784	1
36.1472	1
78.8992	1
40.1152	1
35.968	1
31.0016	1
27.1872	1
10.496	1
5.248	1
85.2992	1
105.293	1
69.0432	1
38.2464	1
33.8944	1
33.152	1
75.0592	1
145.818	1
13.3376	1
2.7904	1
5.9392	1
70.5536	1
3.8912	1
13.9776	1
13.4144	1
4.48	1
10.9824	1
49.024	1
4.7872	1
4.6336	1
34.0224	1
277.222	1
13.952	1
32.3584	1
52.8128	1
30.9504	1
15.2832	1
6.0416	1
40.2944	1
4.2496	1
3.2256	1
38.6048	1
63.1808	1
28.5696	1
17.3568	1
40.0896	1
40.4224	1
65.8944	1
36.096	1
5.0432	1
4.5568	1
3.5584	1
34.9696	1
8.448	1
33.0752	1
9.9584	1
133.811	1
37.1712	1
30.9248	1
13.1072	1
72.1152	1
2.8672	1
220.518	1
28.5696	1
119.578	1
39.1424	1
45.3632	1
5.8624	1
50.6624	1
118.144	1
56.704	1
28.0064	1
3.8912	1
4.3776	1
12.2368	1
34.7136	1
9.8304	1
31.3344	1
3.0976	1
31.1552	1
13.2096	1
5.6576	1
9.8304	1
66.6368	1
146.765	1
33.8176	1
3.1232	1
119.654	1
322.406	1
8.2688	1
2.7136	1
36.5824	1
6.3232	1
58.1888	1
40.4224	1
76.6208	1
15.4112	1
39.8848	1
5.376	1
3.4816	1
28.288	1
71.808	1
8.6528	1
5.2736	1
44.7488	1
33.664	1
41.3184	1
5.6832	1
38.272	1
23.7056	1
72.448	1
6.784	1
78.0032	1
7.808	1
35.712	1
8.192	1
62.4384	1
14.5408	1
54.8864	1
3.7888	1
9.6256	1
5.3504	1
97.2288	1
23.2448	1
30.3872	1
60.1088	1
67.6352	1
42.8032	1
2.688	1
61.4656	1
108.237	1
30.7456	1
159.923	1
637.056	1
105.395	1
47.4112	1
46.5408	1
31.9488	1
3.3536	1
70.0672	1
41.0624	1
36.7616	1
35.8656	1
34.6368	1
43.6992	1
3.6096	1
40.1152	1
34.6368	1
56.704	1
3.8144	1
42.0864	1
58.24	1
53.7088	1
9.088	1
14.08	1
14.8992	1
3.6352	1
3.6608	1
2.9696	1
34.176	1
6.528	1
3.84	1
66.9952	1
63.7184	1
8.4736	1
4.5312	1
43.0592	1
3.7888	1
50.5344	1
11.3152	1
6.656	1
7.7056	1
2.6368	1
13.5168	1
35.9936	1
4.7616	1
11.0592	1
66.048	1
93.2352	1
6.6304	1
61.5936	1
35.328	1
8.576	1
53.9392	1
12.7232	1
66.3808	1
3.7376	1
28.0576	1
2.7136	1
11.136	1
35.712	1
9.3696	1
49.2288	1
67.3024	1
2475.85	1
53.1456	1
77.9776	1
491.802	1
34.8416	1
32.1792	1
84.4288	1
77.1072	1
21.8368	1
57.6768	1
7.0144	1
3.0976	1
504.371	1
41.088	1
70.2208	1
45.568	1
38.9632	1
38.1952	1
41.0368	1
160.563	1
684.672	1
5.0432	1
100.045	1
28.6976	1
4.6848	1
32.2048	1
1460.61	1
49.5616	1
34.1504	1
31.232	1
5.8112	1
35.5584	1
5.5808	1
32.9216	1
2.7904	1
41.6512	1
14.8224	1
4.6336	1
2.944	1
7.168	1
22.2976	1
30.3616	1
27.4688	1
41.8816	1
39.7312	1
238.694	1
39.168	1
3.7376	1
58.3424	1
32.1536	1
6.4768	1
11.0592	1
59.2384	1
34.5088	1
71.552	1
35.712	1
53.8112	1
6.0416	1
22.9376	1
30.3872	1
29.2864	1
596.838	1
36.736	1
30.5664	1
38.8864	1
33.1008	1
7.1424	1
26.496	1
30.1056	1
28.8512	1
8.6528	1
46.08	1
29.4144	1
33.2544	1
17.1264	1
6.4768	1
89.0112	1
37.8368	1
11.8016	1
65.6384	1
122.675	1
8.4736	1
65.3568	1
37.4272	1
8.4736	1
33.8944	1
8.2432	1
3.4304	1
5.1968	1
12.16	1
30.08	1
4.7616	1
60.7232	1
38.4	1
3.6096	1
28.9792	1
117.632	1
6.4256	1
58.2656	1
47.232	1
39.0912	1
8.8576	1
39.3728	1
7.3472	1
35.5072	1
55.424	1
10.9056	1
10.1888	1
11.3152	1
46.1824	1
39.0912	1
31.104	1
6.9632	1
31.2576	1
72.4736	1
47.5392	1
22.8608	1
13.2352	1
3.1488	1
56.0128	1
3.5584	1
17.4592	1
30.464	1
43.9296	1
19.2768	1
7.6288	1
34.56	1
9.9584	1
8.5504	1
30.208	1
42.8032	1
35.7888	1
52.8128	1
3.84	1
11.9808	1
4.3008	1
3.6608	1
5.1712	1
16.1792	1
56.3712	1
30.8992	1
29.0048	1
9.5744	1
53.632	1
33.7664	1
10.2912	1
5.8112	1
6.0672	1
3.4304	1
18.9696	1
26.8544	1
40.9856	1
4.1728	1
192.742	1
37.4272	1
3.5072	1
36.7616	1
3.712	1
32.1536	1
53.4784	1
8.8576	1
14.336	1
139.213	1
3.3536	1
40.5504	1
9.9584	1
12.1856	1
4.096	1
235.29	1
3.456	1
6.016	1
14.8736	1
16.3584	1
33.3824	1
9.6512	1
6.0928	1
8.7296	1
32.0256	1
47.4624	1
15.5904	1
3.0464	1
21.1968	1
11.2384	1
33.5104	1
41.728	1
50.5088	1
65.3568	1
47.616	1
33.8688	1
37.8624	1
34.1504	1
38.144	1
52.4288	1
12.2112	1
9.472	1
20.8384	1
33.6384	1
35.584	1
58.6752	1
3.2768	1
120.934	1
19.6096	1
7.552	1
12.9792	1
36.7872	1
11.648	1
9.0368	1
40.3456	1
6.3488	1
137.728	1
11.52	1
5.6064	1
38.8608	1
6.0672	1
45.7984	1
4.3776	1
23.3216	1
55.936	1
121.728	1
99.584	1
46.848	1
35.712	1
9.2416	1
13.0048	1
24.96	1
11.6224	1
43.0336	1
34.3552	1
106.931	1
19.0464	1
38.7328	1
35.5328	1
43.7248	1
31.232	1
57.2928	1
2.7136	1
53.2224	1
23.1936	1
87.5264	1
39.7056	1
36.3776	1
37.3504	1
8.2944	1
9.7024	1
81.6384	1
36.992	1
7.4496	1
3.328	1
67.968	1
6.3232	1
2.5856	1
7.6032	1
6.1696	1
58.624	1
8.1408	1
6.784	1
8.6272	1
13.6192	1
50.7136	1
114.202	1
60.1856	1
67.7632	1
56.064	1
34.4064	1
36.4544	1
3.2256	1
36.864	1
5.7088	1
41.344	1
32.2048	1
45.4912	1
5.0176	1
2.6368	1
21.9392	1
94.72	1
38.0672	1
54.4768	1
27.8272	1
30.7712	1
27.2128	1
11.264	1
47.5136	1
61.0048	1
40.2944	1
44.9792	1
33.792	1
56.6528	1
3.1488	1
3.6352	1
38.0928	1
73.8048	1
8.6784	1
59.3152	1
30.5664	1
29.2608	1
76.4416	1
12.1856	1
1710.18	1
41.5488	1
58.5216	1
31.2832	1
31.7184	1
3.4304	1
32.3072	1
63.616	1
3.1744	1
32.128	1
35.9168	1
5.4784	1
59.1104	1
37.6064	1
3.84	1
35.0976	1
8.1664	1
45.9264	1
58.0096	1
46.9504	1
48.3584	1
54.912	1
10.9056	1
35.7888	1
82.8672	1
6.0928	1
41.2416	1
3.6096	1
27.5712	1
66.4832	1
38.9376	1
7.808	1
48.896	1
63.5136	1
49.92	1
44.6464	1
358.707	1
30.5664	1
6.4	1
61.312	1
5.4784	1
19.584	1
49.9712	1
67.0208	1
4.1984	1
35.4048	1
4.8896	1
148.301	1
33.8176	1
35.072	1
3.4816	1
42.7776	1
1690.04	1
77.568	1
67.7632	1
14.4384	1
29.2608	1
11.6224	1
33.7408	1
2.6112	1
41.1136	1
950.733	1
32.8704	1
4.0704	1
5.376	1
21.8368	1
7.936	1
10.6496	1
90.368	1
4.8128	1
3.4048	1
10.0608	1
11.3152	1
28.1088	1
481.613	1
12.288	1
45.8752	1
84.7872	1
46.1568	1
38.8352	1
28.7232	1
36.1216	1
32.3072	1
59.904	1
20.1472	1
141.133	1
36.7872	1
36.6848	1
4.7104	1
22.8864	1
56.9344	1
32.4864	1
29.5936	1
37.3248	1
5.0432	1
7.7056	1
2.688	1
30.2336	1
35.1488	1
48.2816	1
69.888	1
37.7344	1
30.9248	1
30.6432	1
87.6032	1
35.7632	1
31.1808	1
4.0192	1
57.6	1
43.3152	1
49.92	1
23.3728	1
42.5216	1
2.8928	1
60.544	1
144.819	1
15.7696	1
50.7392	1
83.2768	1
38.9888	1
169.37	1
50.6112	1
29.1328	1
6135.91	1
29.5424	1
8.8576	1
5.8368	1
4.864	1
33.2544	1
7.04	1
9.472	1
6.912	1
9.2672	1
59.6736	1
10.1888	1
7.168	1
5.5552	1
118.272	1
3.4048	1
7.3728	1
15.6416	1
14.0288	1
32.8448	1
48.1024	1
30.3872	1
45.6704	1
3.84	1
32.0768	1
28.672	1
39.2704	1
29.1328	1
34.7904	1
3.0464	1
2.6624	1
56.7296	1
43.9552	1
56.8576	1
47.872	1
47.0016	1
31.2832	1
3.9424	1
34.5344	1
139.187	1
63.0784	1
28.8	1
49.28	1
2.8672	1
7.7824	1
128.742	1
16.1024	1
35.4304	1
43.2128	1
42.0608	1
95.4624	1
37.4016	1
40.1152	1
44.6208	1
33.2032	1
28.2624	1
53.8624	1
3.2512	1
7.552	1
10.8544	1
14.0032	1
35.4304	1
7.68	1
6.528	1
35.8656	1
50.0224	1
3.456	1
37.12	1
3.5328	1
38.4256	1
49.4336	1
43.9808	1
2.9696	1
230.886	1
37.4016	1
32.3072	1
55.6544	1
97.0496	1
6.3232	1
7.8592	1
32.1792	1
40.576	1
4.7872	1
21.12	1
6.0928	1
125.184	1
27.136	1
21.2736	1
3.1488	1
216.55	1
4.224	1
33.0752	1
39.7312	1
39.3984	1
8.2432	1
34.0224	1
8.4992	1
41.2672	1
8.7552	1
36.5568	1
3.9168	1
7.8336	1
37.6064	1
6.9376	1
56.6784	1
61.8496	1
31.5648	1
28.7488	1
4.5056	1
62.4128	1
125.901	1
46.2336	1
3.8912	1
41.088	1
119.936	1
32.4096	1
5.5808	1
13.5424	1
164.864	1
79.0272	1
36.2496	1
4.9408	1
30.6688	1
11.1872	1
4.3264	1
33.792	1
11.4688	1
38.3232	1
40.1152	1
42.496	1
49.9456	1
38.2976	1
35.0208	1
52.1472	1
79.104	1
54.272	1
9.6256	1
39.0912	1
47.4624	1
7.0656	1
46.976	1
32.4608	1
44.2112	1
37.0688	1
86.0928	1
34.7136	1
34.7648	1
34.9696	1
3.9424	1
14.4384	1
31.5648	1
63.0016	1
5.888	1
4.992	1
32.7936	1
33.5616	1
23.2192	1
13.7728	1
65.2544	1
2190.31	1
122.419	1
3.4816	1
58.3424	1
42.8544	1
5.9392	1
6.6048	1
62.8992	1
9.5744	1
90.7008	1
42.752	1
36.8896	1
42.0608	1
678.144	1
72.8832	1
31.6672	1
5.7344	1
11.8016	1
20.096	1
9.1392	1
40.5504	1
134.17	1
31.8976	1
34.0992	1
3.968	1
47.5392	1
82.2016	1
37.6832	1
7.1424	1
7.8592	1
98.3552	1
33.2032	1
215.373	1
6.2464	1
30.4384	1
2.688	1
3.0464	1
13.4144	1
39.6288	1
42.0352	1
60.7232	1
38.6304	1
40.6784	1
18.4832	1
31.4624	1
49.0752	1
38.144	1
2.9184	1
72.5248	1
32.8448	1
36.8896	1
31.4368	1
6.272	1
11.8784	1
5.7856	1
9.0368	1
32.4864	1
27.8784	1
54.0416	1
49.2544	1
11.5456	1
5.0688	1
41.8048	1
41.5232	1
7.04	1
49.9712	1
39.1424	1
34.1504	1
13.056	1
4.7616	1
55.8848	1
11.8016	1
5.5552	1
30.5664	1
6.5024	1
524.339	1
6.9888	1
5.9392	1
6.2208	1
6.272	1
31.4624	1
2.5856	1
4.6848	1
47.3856	1
33.4848	1
6.0672	1
16.9472	1
59.5712	1
33.5872	1
3.328	1
5.7088	1
10.9824	1
31.6672	1
43.6224	1
54.1696	1
7.3472	1
21.8624	1
16.0768	1
3.2	1
51.6352	1
10.5216	1
4.4544	1
76.1344	1
13.3632	1
35.3024	1
8.7552	1
37.4784	1
718.234	1
47.104	1
53.0432	1
33.8432	1
38.016	1
43.2384	1
7.5776	1
53.5296	1
101.427	1
173.158	1
7.6032	1
37.1712	1
11.3664	1
30.6432	1
31.5904	1
11.0848	1
29.2608	1
118.656	1
183.296	1
64.0256	1
40.576	1
58.2144	1
52.7616	1
20.7872	1
8.4736	1
6.528	1
41.0624	1
69.376	1
73.3952	1
165.658	1
55.5776	1
31.0272	1
49.5872	1
12.8256	1
51.6352	1
68.0448	1
3.1232	1
36.7872	1
68.6336	1
7.168	1
5.376	1
36.5312	1
35.7376	1
33.536	1
32.2304	1
20.8384	1
36.6336	1
6.1184	1
32.2048	1
38.6048	1
31.616	1
4.0192	1
8.704	1
28.1088	1
9.2416	1
43.1616	1
10.2144	1
50.9184	1
31.6928	1
59.4688	1
34.5344	1
6.2464	1
42.8032	1
20.5056	1
7.2192	1
6.0416	1
75.1872	1
3.4304	1
67.1488	1
4.608	1
10.6496	1
45.2608	1
15.2832	1
6.6304	1
43.0848	1
34.2016	1
31.9232	1
25.7792	1
84.1216	1
98.2016	1
64.6912	1
262.272	1
28.032	1
15.4368	1
11.4176	1
34.6112	1
15.6416	1
49.6896	1
9.2928	1
28.9024	1
46.2592	1
45.3888	1
4.5056	1
33.0496	1
33.6384	1
34.7904	1
35.584	1
77.7728	1
40.5248	1
33.408	1
31.9488	1
26.9568	1
9.7792	1
29.4912	1
3.6608	1
42.368	1
33.7152	1
3.2256	1
6.9632	1
50.7904	1
102.886	1
36.4544	1
33.0752	1
35.5072	1
74.4704	1
6.912	1
35.4816	1
3.2	1
8.6272	1
4.7872	1
10.88	1
15.3344	1
21.2224	1
53.9648	1
35.0976	1
31.9744	1
279.654	1
46.3872	1
6.2976	1
9.7024	1
56.704	1
5.632	1
70.4	1
68.0704	1
150.81	1
38.2208	1
9.0368	1
26.5984	1
5.6064	1
19.2512	1
30.4128	1
64.6656	1
64.3072	1
72.0384	1
2.7136	1
4.0448	1
31.1552	1
173.722	1
37.0176	1
5.8368	1
30.336	1
3.0464	1
31.0784	1
30.1056	1
48.6912	1
37.0176	1
30.5152	1
32.1536	1
15.9488	1
39.552	1
34.6368	1
56.2944	1
72.6784	1
6.9632	1
3.7888	1
4.3776	1
25.4976	1
624.742	1
21.8624	1
34.048	1
50.8928	1
36.4032	1
5.1968	1
4.9408	1
9.7536	1
2.9184	1
37.1968	1
6.144	1
60.8512	1
8.7296	1
37.248	1
14.6688	1
14.1568	1
661.581	1
6.8096	1
7.2448	1
29.7984	1
42.3168	1
51.6608	1
13.2096	1
3.712	1
5.8112	1
20.3776	1
32.6912	1
186.24	1
6.4	1
67.1744	1
5.2224	1
153.677	1
710.81	1
82.3552	1
49.5872	1
30.4896	1
39.7568	1
3.7376	1
4.4544	1
33.2544	1
57.8816	1
35.5072	1
63.872	1
33.6384	1
8.192	1
56.6528	1
36.0192	1
37.5552	1
5.8368	1
18.4576	1
11.4688	1
14.1056	1
42.5984	1
10.88	1
6.8608	1
97.408	1
58.624	1
32.9216	1
12.8256	1
35.584	1
65.9456	1
39.0656	1
43.8784	1
3.8656	1
32.512	1
33.5616	1
4.7616	1
13.8496	1
10.1376	1
3.072	1
3.3536	1
8.704	1
15.7696	1
36.1472	1
6.5536	1
5.8624	1
78.5152	1
3.6352	1
58.0608	1
109.133	1
39.6544	1
6.6048	1
3.3792	1
38.9888	1
34.048	1
89.8816	1
36.5056	1
42.88	1
92.4672	1
8.3968	1
29.8496	1
3.4304	1
84.8896	1
36.8384	1
19.4048	1
7.3728	1
32.6144	1
6.7072	1
6.6304	1
72.0896	1
4.1472	1
38.784	1
23.8848	1
37.6832	1
46.336	1
20.8128	1
125.798	1
10.4704	1
2.6368	1
31.2832	1
38.1952	1
57.344	1
4.48	1
50.9696	1
9.0112	1
14.08	1
20.6592	1
5.4016	1
4.0704	1
45.056	1
49.664	1
51.1232	1
6.1696	1
6.8096	1
41.1904	1
7.4752	1
11.7504	1
47.104	1
30.72	1
2.5856	1
35.9424	1
3.4304	1
7.9616	1
58.8288	1
57.5744	1
111.155	1
104.038	1
3.3024	1
30.336	1
3.6352	1
2.816	1
17.5872	1
3.712	1
88.7296	1
11.008	1
6.912	1
3.6864	1
7.1936	1
6.4512	1
71.5008	1
72.6016	1
36.224	1
3.3792	1
69.8112	1
7.4752	1
50.9952	1
558.157	1
130.79	1
33.1264	1
54.016	1
90.1888	1
2.8416	1
90.2912	1
43.7248	1
120.576	1
50.176	1
30.0032	1
50.944	1
40.0384	1
57.5232	1
46.8736	1
9.2416	1
28.8768	1
7.1424	1
10.7008	1
31.104	1
27.5712	1
4.9664	1
48.2048	1
11.9296	1
56.9088	1
6.8608	1
39.808	1
15.5904	1
88.9088	1
13.7216	1
42.4192	1
12.7744	1
15.7184	1
29.0048	1
66.9184	1
65.2288	1
6.1696	1
32.0256	1
3.7376	1
38.0416	1
3.6096	1
3.9168	1
26.0864	1
28.1344	1
72.4736	1
31.5136	1
46.2848	1
37.632	1
173.133	1
84.8896	1
35.3536	1
7.7824	1
13.8496	1
9.4976	1
2.6112	1
4.4288	1
4.5568	1
36.0192	1
134.886	1
2.6112	1
47.5136	1
23.424	1
67.328	1
12.5952	1
73.8816	1
44.672	1
45.1584	1
188.186	1
79.4368	1
33.5104	1
36.9408	1
3.5584	1
3.3792	1
39.936	1
63.7952	1
123.366	1
3.4304	1
134.502	1
4.8384	1
47.0016	1
72.576	1
28.544	1
11.9296	1
61.4144	1
6.6048	1
34.304	1
2.944	1
70.5024	1
10.9056	1
100.198	1
28.032	1
43.8528	1
67.5328	1
41.6768	1
36.0704	1
6.656	1
5.2736	1
12.4416	1
7.296	1
39.68	1
4.9664	1
31.7184	1
32.8192	1
3.0208	1
44.416	1
8.2944	1
5.6832	1
34.2016	1
34.944	1
11.52	1
37.4784	1
98.4832	1
32.4352	1
11.9552	1
37.8624	1
6.5792	1
41.728	1
78.1312	1
4.3264	1
1910.99	1
39.1424	1
4.864	1
14.7456	1
4.4544	1
65.4336	1
6.4256	1
79.0784	1
12.8	1
33.8176	1
5.6832	1
61.6192	1
446.208	1
12.9024	1
78.4896	1
38.0928	1
30.4384	1
11.7248	1
7.5776	1
2.8672	1
184.627	1
2.7648	1
5.4528	1
39.4752	1
13.2864	1
8.064	1
38.5024	1
2.5856	1
9.8816	1
2.6624	1
61.5168	1
103.654	1
7.2704	1
3.9424	1
32.1024	1
14.1824	1
593.562	1
9.0368	1
5.2736	1
11.8016	1
71.1936	1
30.2848	1
24.4736	1
6.6304	1
4.864	1
14.8224	1
36.864	1
9.984	1
3.584	1
3.4816	1
10.3168	1
43.9296	1
7.5776	1
36.736	1
100.915	1
29.4656	1
24.8576	1
58.6752	1
11.52	1
31.4368	1
7.9616	1
7.8336	1
65.5616	1
7.0144	1
4.7104	1
14.1824	1
30.6944	1
34.2528	1
33.28	1
44.1344	1
70.8096	1
38.2208	1
28.16	1
6.528	1
38.4256	1
5.7856	1
64.0512	1
2.688	1
6.7584	1
25.216	1
66.7648	1
3.712	1
36.0704	1
37.8112	1
10.5728	1
8.32	1
39.5008	1
4.5056	1
41.9328	1
8.448	1
36.1728	1
2.8672	1
322.509	1
35.84	1
3.3792	1
41.4208	1
8.704	1
32.7424	1
2.6112	1
2.7392	1
11.136	1
45.0048	1
8.5248	1
4.5824	1
24.8576	1
41.9072	1
6.144	1
14.592	1
24.064	1
5.248	1
42.7264	1
34.2016	1
12.7744	1
7.6032	1
6.6048	1
8.448	1
8.6528	1
21.1712	1
19.0208	1
105.037	1
11.2384	1
9.216	1
48.9216	1
35.3792	1
35.4048	1
5.504	1
10.1376	1
84.3776	1
9.2928	1
4.224	1
36.0704	1
2.8416	1
73.472	1
171.955	1
37.2992	1
2.944	1
47.9232	1
28.9792	1
7.936	1
2.944	1
34.688	1
16.256	1
37.2992	1
3.8144	1
37.0688	1
10.5728	1
146.534	1
12.6464	1
511.949	1
4.5568	1
6.1696	1
[truncated: 29,361 more rows]

## Sheet: Fig 2C raw p putida
droplet_area	repeat
1604.99	1
15.3344	1
145.254	1
70.8352	1
30.72	1
119.936	1
62.1824	1
51.2	1
28.5952	1
195.763	1
132.506	1
96.6656	1
3.7632	1
228.531	1
11.0848	1
13.0816	1
110.848	1
66.0224	1
62.1824	1
110.95	1
105.242	1
79.488	1
123.648	1
49.5104	1
162.611	1
78.7968	1
4.5056	1
7.3984	1
146.048	1
96.128	1
63.4112	1
1122.36	1
511.309	1
144.717	1
138.138	1
53.9904	1
5.76	1
76.8	1
171.597	1
15.5648	1
136.883	1
73.3952	1
417.126	1
172.288	1
104.96	1
112.102	1
66.8672	1
299.955	1
164.326	1
261.171	1
120.525	1
50.8672	1
91.6736	1
82.0224	1
65.7152	1
4.4544	1
99.7376	1
59.3664	1
84.9408	1
66.0992	1
4.5824	1
71.4752	1
320.41	1
90.9568	1
385.51	1
146.304	1
111.949	1
41.5488	1
163.994	1
6.2208	1
320.87	1
100.07	1
205.85	1
97.6128	1
135.168	1
153.037	1
61.3888	1
477.824	1
116.608	1
117.171	1
95.1808	1
182.989	1
130.867	1
249.882	1
94.9504	1
103.142	1
247.808	1
104.294	1
86.784	1
120.499	1
117.683	1
81.3568	1
92.8768	1
58.0352	1
57.8304	1
35.1488	1
94.8992	1
183.45	1
74.9312	1
57.8816	1
70.528	1
190.413	1
46.0032	1
75.0592	1
211.226	1
77.9008	1
115.917	1
213.35	1
69.376	1
96.5888	1
166.118	1
169.549	1
107.827	1
64.2816	1
71.6544	1
114.048	1
94.2592	1
178.842	1
81.7664	1
327.168	1
173.133	1
70.6048	1
85.376	1
89.5232	1
76.9024	1
107.827	1
183.424	1
109.594	1
97.7664	1
28.16	1
173.798	1
121.549	1
72.4224	1
96.256	1
81.5616	1
117.734	1
81.8688	1
418.842	1
2.7136	1
107.802	1
136.038	1
64.384	1
1395.15	1
573.824	1
138.086	1
151.731	1
83.7376	1
68.7104	1
370.074	1
150.758	1
59.648	1
46.0288	1
47.8208	1
138.445	1
51.5584	1
81.8432	1
229.376	1
19.456	1
2.816	1
86.4768	1
3.7888	1
262.912	1
87.5776	1
3.9424	1
92.1344	1
81.4848	1
270.95	1
84.4032	1
26.8288	1
115.686	1
59.9808	1
135.27	1
3.8144	1
284.979	1
51.8144	1
113.946	1
137.984	1
194.483	1
91.8784	1
84.096	1
67.2512	1
96.4096	1
155.136	1
145.254	1
3.3792	1
78.336	1
94.336	1
127.258	1
7.1168	1
95.8464	1
163.405	1
40.9344	1
90.7776	1
66.3808	1
125.926	1
63.9744	1
124.083	1
371.558	1
45.1072	1
105.242	1
112	1
40.448	1
159.59	1
50.5088	1
85.248	1
2.7904	1
136.448	1
126.771	1
81.6128	1
37.6832	1
81.1776	1
2.6112	1
40.0128	1
79.0528	1
163.84	1
112.794	1
75.1872	1
97.2544	1
202.291	1
75.52	1
231.91	1
4.1728	1
42.5472	1
259.379	1
124.083	1
149.862	1
92.544	1
62.976	1
136.038	1
67.2768	1
136.602	1
92.416	1
301.286	1
118.195	1
193.997	1
75.1616	1
39.8848	1
124.467	1
38.016	1
62.6176	1
118.477	1
299.648	1
76.544	1
74.8288	1
172.646	1
103.168	1
222.592	1
3.2512	1
19.3792	1
154.342	1
2387.94	1
73.6768	1
67.1488	1
81.3312	1
83.9936	1
52.3008	1
124.262	1
66.3296	1
94.592	1
4089.55	1
89.5232	1
184.704	1
3.328	1
155.366	1
3.5328	1
258.995	1
191.846	1
224.384	1
84.352	1
10.7264	1
4.224	1
66.1504	1
90.9056	1
165.171	1
84.9664	1
348.083	1
136.09	1
11.264	1
97.6384	1
112.563	1
80.0512	1
84.9152	1
83.2512	1
228.122	1
118.554	1
86.9376	1
102.784	1
80.3328	1
97.6128	1
41.6256	1
85.5296	1
82.8928	1
76.0064	1
226.458	1
3.3792	1
1113.65	1
3.3536	1
95.6672	1
170.163	1
106.88	1
81.7408	1
253.645	1
187.085	1
89.1392	1
124.698	1
90.112	1
141.389	1
146.918	1
94.2336	1
137.523	1
818.637	1
81.8688	1
89.2672	1
65.5872	1
3.9168	1
67.4048	1
149.606	1
295.552	1
82.6624	1
189.21	1
74.9824	1
89.856	1
428.8	1
176.563	1
223.462	1
98.0992	1
52.0704	1
15.1552	1
131.533	1
3.328	1
254.106	1
154.342	1
271.334	1
113.715	1
125.491	1
720.947	1
105.267	1
5.7344	1
109.466	1
66.7648	1
146.688	1
40.7808	1
69.76	1
182.118	1
23.3984	1
406.298	1
80.6912	1
26.8544	1
78.4384	1
111.923	1
164.634	1
188.698	1
71.2192	1
115.328	1
111.334	1
46.3616	1
111.462	1
6.912	1
163.994	1
47.0016	1
318.387	1
94.7968	1
60.1344	1
91.4432	1
92.9792	1
89.7792	1
87.1168	1
45.9264	1
112.512	1
86.8864	1
59.1872	1
61.2608	1
62.336	1
69.376	1
1196.54	1
123.085	1
60.288	1
113.152	1
255.744	1
65.8432	1
96.512	1
258.611	1
36.736	1
7.3472	1
45.4144	1
123.571	1
69.0176	1
109.645	1
138.01	1
94.7712	1
274.253	1
121.242	1
54.2464	1
77.0048	1
7.7824	1
231.27	1
143.898	1
86.4768	1
3.456	1
500.198	1
60.8768	1
151.782	1
262.195	1
151.834	1
85.7344	1
58.24	1
105.728	1
93.9008	1
69.12	1
2.9952	1
36.6592	1
115.328	1
191.744	1
128.435	1
30.7968	1
48.5632	1
50.2528	1
3.8144	1
67.3536	1
95.488	1
93.44	1
73.8304	1
84.0448	1
57.728	1
91.3664	1
45.2608	1
58.2912	1
85.6576	1
123.392	1
3.6864	1
106.24	1
3.6608	1
164.557	1
3.0464	1
184.474	1
99.0976	1
109.03	1
75.1872	1
46.9248	1
189.133	1
218.88	1
3.6608	1
101.786	1
188.006	1
70.2464	1
75.52	1
7.2448	1
233.677	1
117.786	1
251.776	1
76.3648	1
4.4032	1
101.76	1
125.082	1
97.8944	1
42.4704	1
68.224	1
231.245	1
115.328	1
466.304	1
107.264	1
111.898	1
95.36	1
181.094	1
284.57	1
184.397	1
71.296	1
102.605	1
74.496	1
148.352	1
64.2304	1
102.477	1
154.445	1
80.5888	1
95.5392	1
109.235	1
78.3104	1
58.4704	1
116.07	1
95.5136	1
99.7888	1
93.2352	1
121.958	1
41.2416	1
90.24	1
93.0048	1
1881.52	1
118.246	1
114.534	1
199.706	1
124.851	1
74.24	1
76.3392	1
144.23	1
2.7648	1
131.994	1
8861.11	1
190.08	1
1085.06	1
148.608	1
92.6464	1
91.7504	1
444.416	1
75.6736	1
3.3536	1
49.8176	1
58.8544	1
110.003	1
128.947	1
120.602	1
98.816	1
46.208	1
74.4704	1
2.944	1
6.272	1
413.85	1
53.2992	1
149.862	1
102.451	1
2.7392	1
67.5072	1
83.5072	1
79.3344	1
81.5616	1
79.1296	1
4.608	1
40.3968	1
69.1712	1
99.456	1
128.384	1
3.0976	1
187.955	1
77.1584	1
97.7664	1
2.944	1
17.536	1
93.4912	1
201.216	1
83.6608	1
84.1472	1
100.352	1
8.3968	1
4.7616	1
4.2496	1
1412.3	1
70.2464	1
286.899	1
159.872	1
15.5136	1
182.784	1
102.093	1
269.67	1
79.3856	1
35.6608	1
3.0976	1
82.3808	1
85.9904	1
3.6096	1
106.47	1
147.635	1
155.315	1
53.7856	1
135.91	1
9.8304	1
115.149	1
110.515	1
43.1104	1
79.872	1
2856.86	1
166.528	1
252.723	1
49.2032	1
66.4064	1
76.0576	1
142.208	1
58.2656	1
349.722	1
71.2448	1
95.8208	1
72.2944	1
602.138	1
55.424	1
131.814	1
149.094	1
710.81	1
144.64	1
52.0192	1
39.7568	1
111.949	1
51.7888	1
15.0528	1
66.4832	1
252.979	1
4.352	1
56.6784	1
64.9472	1
58.6496	1
47.9744	1
71.3984	1
107.443	1
134.784	1
60.8	1
252.979	1
104.013	1
81.1776	1
320.666	1
88.6528	1
71.9616	1
54.5792	1
73.4208	1
65.9712	1
163.251	1
82.56	1
58.496	1
84.6336	1
100.992	1
101.274	1
53.9136	1
74.9312	1
85.9648	1
107.315	1
286.643	1
314.547	1
232.602	1
65.7152	1
122.624	1
230.784	1
128.282	1
81.7408	1
175.283	1
79.2832	1
64.256	1
153.114	1
207.053	1
183.885	1
155.725	1
290.381	1
69.248	1
108.749	1
62.72	1
109.824	1
232.934	1
47.4368	1
89.5232	1
2871.78	1
85.2992	1
126.336	1
82.56	1
111.206	1
36.0704	1
408.627	1
49.7152	1
64.1024	1
188.032	1
291.43	1
141.542	1
3.4816	1
78.208	1
45.0048	1
67.5072	1
122.65	1
214.477	1
75.6992	1
95.36	1
45.1584	1
102.63	1
71.7056	1
228.326	1
186.061	1
55.552	1
65.28	1
106.931	1
95.616	1
11.5712	1
47.36	1
109.926	1
75.5712	1
359.68	1
87.7056	1
107.52	1
139.776	1
60.7488	1
159.693	1
54.016	1
172.442	1
69.9648	1
142.541	1
137.498	1
57.1392	1
46.6176	1
76.4416	1
118.784	1
75.904	1
59.9296	1
86.6048	1
99.2512	1
63.744	1
69.0688	1
114.227	1
66.4064	1
72.8576	1
259.456	1
114.432	1
50.0736	1
57.1136	1
67.2768	1
37.8368	1
85.5552	1
122.317	1
2.9184	1
76.3392	1
117.99	1
65.792	1
70.144	1
187.75	1
8.8064	1
51.9424	1
65.8944	1
84.9152	1
90.24	1
79.3856	1
98.4576	1
101.811	1
12.2624	1
148.173	1
62.8736	1
109.056	1
99.7888	1
208.614	1
70.784	1
83.4048	1
77.568	1
3.7888	1
101.786	1
234.675	1
379.008	1
85.0432	1
248.32	1
104.371	1
98.6624	1
2.9952	1
67.9424	1
34.3808	1
71.0144	1
155.827	1
54.5024	1
4.0704	1
166.451	1
44.1088	1
123.392	1
96.2816	1
171.597	1
120.806	1
362.035	1
70.4	1
76.5184	1
80.64	1
124.134	1
98.2272	1
44.5696	1
118.835	1
34.56	1
179.712	1
83.456	1
69.2992	1
75.7248	1
129.741	1
166.118	1
117.939	1
279.04	1
96.256	1
146.278	1
12.9024	1
651.443	1
198.477	1
110.746	1
13.9008	1
165.786	1
102.323	1
71.3984	1
98.688	1
160.179	1
68.7616	1
86.784	1
82.6112	1
18.8672	1
63.488	1
79.616	1
77.824	1
132.915	1
196.378	1
66.944	1
64.256	1
174.336	1
497.92	1
26.7008	1
102.067	1
93.6704	1
226.842	1
41.4464	1
73.3952	1
111.437	1
200.858	1
90.4192	1
60.6464	1
96.3584	1
131.635	1
77.0304	1
102.579	1
98.6112	1
85.2992	1
103.066	1
86.8608	1
85.504	1
54.5024	1
77.0304	1
52.7104	1
46.5408	1
142.413	1
40.8576	1
69.5552	1
129.664	1
116.864	1
130.099	1
52.8128	1
318.08	1
108.928	1
153.933	1
130.048	1
90.4448	1
81.3568	1
185.958	1
106.291	1
107.622	1
127.795	1
842.496	1
2.6368	1
130.227	1
38.4768	1
70.1696	1
93.568	1
72.0384	1
132.531	1
64.9216	1
135.194	1
39.936	1
10.4704	1
132.173	1
220.851	1
129.766	1
100.787	1
11.52	1
3041.33	1
144.435	1
56.7296	1
113.28	1
172.083	1
82.9952	1
184.55	1
93.8496	1
138.982	1
222.515	1
72.9856	1
91.8272	1
176.256	1
76.4416	1
123.443	1
110.362	1
127.923	1
174.976	1
71.7056	1
83.2256	1
66.4576	1
74.9056	1
198.656	1
119.04	1
155.085	1
46.592	1
57.6768	1
80.2816	1
12.7488	1
64.7424	1
57.4208	1
158.438	1
63.7184	1
3.456	1
97.2288	1
91.5712	1
142.874	1
82.1248	1
83.8144	1
326.118	1
54.1952	1
99.5584	1
86.912	1
4.3776	1
104.064	1
41.6256	1
265.472	1
91.136	1
95.8464	1
255.002	1
52.0192	1
153.242	1
66.8416	1
196.454	1
171.827	1
68.3008	1
111.821	1
199.014	1
3.9168	1
127.386	1
140.902	1
165.171	1
95.8208	1
372.608	1
136.013	1
3.328	1
466.253	1
3.0464	1
254.157	1
8.8064	1
5.4528	1
81.8432	1
5.76	1
132.429	1
63.2576	1
82.8672	1
99.8656	1
121.933	1
99.84	1
346.445	1
139.213	1
101.069	1
10.1632	1
4.4032	1
54.1696	1
259.072	1
73.9072	1
82.56	1
121.907	1
84.7872	1
115.2	1
412.339	1
559.667	1
185.472	1
67.7888	1
128.256	1
60.2368	1
10.5216	1
56.1152	1
150.707	1
76.5696	1
85.248	1
148.147	1
75.2128	1
126.413	1
279.117	1
143.002	1
100.045	1
97.92	1
38.528	1
112.102	1
107.827	1
483.277	1
107.597	1
5.3504	1
78.6432	1
12.0576	1
127.872	1
82.2016	1
67.2	1
138.214	1
56.8576	1
4.8128	1
3.2	1
4.3264	1
132.275	1
94.0288	1
400.666	1
148.813	1
122.854	1
63.232	1
4.224	1
69.7856	1
194.33	1
91.136	1
65.5616	1
41.6512	1
4.224	1
70.272	1
4.3008	1
349.184	1
33.0752	1
59.0336	1
78.1312	1
193.741	1
98.9952	1
101.478	1
124.442	1
81.4336	1
207.309	1
102.272	1
89.344	1
109.491	1
197.606	1
80.4608	1
46.6688	1
95.9744	1
5.9648	1
706.637	1
335.77	1
66.0736	1
54.6816	1
68.9152	1
88.1152	1
59.4944	1
168.781	1
73.3952	1
64.6656	1
64.512	1
110.259	1
96.7168	1
85.504	1
112.768	1
121.779	1
763.136	1
76.1856	1
64.5376	1
2.8672	1
395.853	1
137.779	1
126.234	1
32.64	1
433.664	1
143.002	1
7.0656	1
60.8768	1
134.195	1
97.92	1
79.5392	1
327.552	1
7.2448	1
84.5568	1
126.848	1
75.776	1
12613	1
126.925	1
162.586	1
963.405	1
86.2976	1
51.6608	1
47.36	1
149.811	1
92.1088	1
4.6592	1
276.07	1
95.4368	1
133.402	1
170.701	1
167.142	1
82.4832	1
95.7184	1
10.4448	1
137.421	1
74.624	1
61.8496	1
145.28	1
74.8288	1
101.632	1
84.5056	1
78.08	1
156.262	1
113.587	1
62.6944	1
122.24	1
299.827	1
4.6848	1
121.498	1
8.576	1
59.2384	1
101.299	1
107.29	1
183.347	1
69.2736	1
72.7808	1
110.694	1
49.024	1
84.736	1
92.1344	1
97.5104	1
86.9632	1
63.8464	1
110.08	1
130.509	1
121.37	1
164.454	1
81.5616	1
151.501	1
70.8608	1
167.014	1
71.5008	1
4.608	1
107.827	1
142.694	1
57.4976	1
161.69	1
3.9936	1
89.856	1
89.4208	1
158.694	1
153.626	1
63.9744	1
3.1232	1
46.3872	1
5.1712	1
46.4384	1
102.144	1
68.5824	1
28.0064	1
84.1472	1
87.6032	1
100.864	1
106.061	1
206.541	1
95.744	1
75.2384	1
42.88	1
208.026	1
139.366	1
81.4848	1
73.0368	1
85.4528	1
57.728	1
95.5904	1
3.072	1
67.8912	1
107.904	1
98.5856	1
76.7232	1
65.7408	1
88.6016	1
203.75	1
127.181	1
82.6624	1
44.6464	1
47.9488	1
31.8976	1
70.8352	1
83.6608	1
64.5376	1
75.904	1
76.0576	1
79.5392	1
406.246	1
105.446	1
80.6144	1
197.12	1
220.621	1
127.872	1
88.4992	1
321.331	1
3.7376	1
4.48	1
103.706	1
107.136	1
56.96	1
67.2512	1
107.674	1
9.216	1
446.285	1
51.712	1
78.08	1
113.51	1
67.1744	1
161.946	1
79.104	1
76.928	1
84.9152	1
88.0128	1
341.299	1
65.8688	1
69.632	1
73.8304	1
116.019	1
247.142	1
84.9664	1
109.85	1
118.426	1
5.4272	1
10.0352	1
81.4336	1
5.9904	1
214.758	1
178.202	1
143.437	1
71.2448	1
96.6656	1
3.0976	1
118.195	1
183.04	1
61.2352	1
71.0912	1
111.667	1
110.259	1
62.6688	1
93.9776	1
88.6528	1
122.214	1
71.3984	1
13.184	1
117.555	1
70.6816	1
102.554	1
96.6144	1
112.307	1
100.403	1
119.424	1
8.6016	1
123.776	1
122.24	1
44.8256	1
84.2752	1
70.528	1
39.6032	1
75.4432	1
310.886	1
2.8928	1
61.6192	1
129.587	1
85.0176	1
928.973	1
99.5584	1
106.01	1
188.109	1
462.797	1
130.739	1
124.006	1
81.8176	1
63.0784	1
112.563	1
94.6944	1
3.84	1
459.827	1
82.9952	1
84.224	1
94.72	1
11.904	1
86.2464	1
241.28	1
118.835	1
8.6272	1
2136.91	1
179.661	1
76.4672	1
107.494	1
56.704	1
80.1024	1
92.2624	1
74.6496	1
211.686	1
224.307	1
96.512	1
164.454	1
98.4576	1
61.7728	1
98.176	1
94.5152	1
194.381	1
135.706	1
135.501	1
121.626	1
461.44	1
95.5136	1
692.557	1
118.938	1
1218.43	1
76.3392	1
68.2752	1
72.9344	1
233.242	1
71.0912	1
79.1552	1
17.3568	1
4.2496	1
191.002	1
217.139	1
23.0144	1
171.443	1
63.3856	1
65.7664	1
68.3264	1
93.4912	1
160.998	1
58.752	1
96.64	1
90.9312	1
92.928	1
200.653	1
51.9168	1
135.782	1
262.81	1
123.29	1
89.0624	1
94.7968	1
55.936	1
143.872	1
379.802	1
77.2864	1
243.251	1
305.536	1
177.51	1
71.8336	1
78.8992	1
43.3408	1
47.4368	1
147.635	1
110.541	1
187.11	1
34.2528	1
134.938	1
10.112	1
84.096	1
79.6928	1
60.7488	1
99.0976	1
10.9312	1
106.906	1
163.584	1
303.642	1
75.9296	1
66.0736	1
65.0496	1
154.854	1
127.002	1
113.664	1
87.7056	1
64.8192	1
255.181	1
460.39	1
103.731	1
80.768	1
227.942	1
482.099	1
175.539	1
74.5728	1
53.0944	1
48.512	1
52.5824	1
106.496	1
10.4448	1
204.16	1
151.808	1
83.328	1
132.096	1
46.72	1
127.59	1
78.9248	1
87.1936	1
66.9696	1
91.5456	1
80.4864	1
71.0912	1
212.25	1
178.509	1
111.283	1
78.464	1
40.6016	1
78.2592	1
80	1
96.3584	1
92.672	1
59.648	1
97.5872	1
263.859	1
75.9808	1
123.443	1
110.285	1
103.373	1
238.285	1
157.491	1
3.8656	1
45.9008	1
126.182	1
126.157	1
187.238	1
96.6656	1
93.7216	1
124.646	1
60.288	1
108.774	1
26.6752	1
159.232	1
3.4816	1
167.962	1
77.4656	1
51.328	1
63.0272	1
168.064	1
220.979	1
222.515	1
113.715	1
155.264	1
45.184	1
71.3728	1
70.1696	1
239.744	1
67.328	1
411.034	1
81.6384	1
117.402	1
130.406	1
115.251	1
58.112	1
76.4928	1
77.5168	1
100.429	1
86.3488	1
102.605	1
151.245	1
225.434	1
145.715	1
335.002	1
739.507	1
87.0656	1
96.8704	1
146.739	1
127.232	1
118.605	1
212.147	1
101.99	1
78.336	1
84.6336	1
341.043	1
73.984	1
123.11	1
165.504	1
43.9808	1
83.5072	1
249.395	1
62.3616	1
124.57	1
137.728	1
57.2672	1
90.8032	1
51.968	1
92.4928	1
28.2624	1
135.706	1
170.675	1
112.026	1
3768.24	1
81.3312	1
191.334	1
133.786	1
79.9744	1
98.3296	1
208.205	1
14.0288	1
63.872	1
110.464	1
107.571	1
96.256	1
8.4736	1
116.147	1
52.9152	1
61.6448	1
89.1136	1
126.669	1
278.272	1
50.3808	1
3.7888	1
79.6672	1
140.954	1
101.76	1
345.011	1
121.651	1
121.114	1
132.992	1
205.21	1
3.2512	1
106.445	1
344.32	1
75.6736	1
66.8928	1
678.118	1
77.4912	1
5.4784	1
319.642	1
100.71	1
137.242	1
102.554	1
62.6432	1
86.7328	1
108.518	1
100.838	1
115.072	1
72.9344	1
36.6592	1
87.168	1
127.898	1
139.546	1
62.2336	1
223.386	1
246.938	1
189.517	1
301.03	1
99.2512	1
192.589	1
105.088	1
113.434	1
54.3488	1
89.1136	1
174.234	1
78.3104	1
94.2336	1
134.938	1
171.264	1
111.514	1
257.664	1
252.621	1
177.971	1
133.222	1
25.216	1
168.218	1
86.0672	1
140.851	1
106.189	1
154.496	1
77.8496	1
66.6624	1
106.368	1
100.813	1
109.286	1
85.4272	1
15.1296	1
555.085	1
50.9952	1
100.352	1
76.3136	1
59.0592	1
52.1984	1
7.8592	1
94.6688	1
348.032	1
97.2288	1
14.5664	1
58.7008	1
120.422	1
69.6064	1
54.528	1
934.349	1
116.941	1
104.243	1
105.267	1
118.528	1
141.517	1
63.0528	1
74.752	1
144.742	1
160.128	1
4.9152	1
109.44	1
140.723	1
100.198	1
92.0576	1
120.73	1
13.056	1
179.174	1
205.107	1
111.411	1
248.166	1
29.0048	1
117.581	1
281.19	1
36.5056	1
180.301	1
110.95	1
1746	1
82.2528	1
50.816	1
53.0944	1
170.112	1
67.328	1
188.544	1
86.0672	1
104.73	1
146.099	1
124.723	1
5.7344	1
48.9472	1
117.837	1
326.758	1
112.256	1
445.645	1
73.1136	1
141.286	1
79.2832	1
198.579	1
89.5744	1
222.387	1
267.264	1
129.869	1
266.368	1
239.667	1
63.4112	1
91.4688	1
73.728	1
307.866	1
88.9344	1
102.4	1
107.93	1
129.869	1
158.08	1
79.1808	1
74.6752	1
3.328	1
188.237	1
180.301	1
9.1904	1
123.034	1
152.397	1
61.7984	1
56.448	1
107.034	1
42.3424	1
310.912	1
181.939	1
500.941	1
79.5392	1
123.904	1
78.1312	1
1828.45	1
67.3024	1
205.824	1
50.5856	1
21.4784	1
104.166	1
168.986	1
129.024	1
140.083	1
91.4688	1
147.584	1
232.243	1
82.2528	1
103.322	1
58.0096	1
4.0192	1
13.5936	1
138.163	1
76.4672	1
28.2624	1
88.5504	1
109.491	1
92.1088	1
86.6304	1
164.096	1
88.32	1
27.2384	1
300.134	1
74.5216	1
312.806	1
50.5344	1
121.549	1
158.746	1
59.2896	1
170.394	1
68.4288	1
73.1904	1
90.0352	1
83.328	1
3.3024	1
107.034	1
90.3168	1
59.3664	1
71.68	1
62.4128	1
16.9728	1
344.602	1
844.646	1
6.4512	1
239.718	1
102.81	1
67.7632	1
82.56	1
362.01	1
115.302	1
58.0352	1
52.096	1
173.952	1
1717.2	1
96.0768	1
126.106	1
55.168	1
189.926	1
191.078	1
2031.31	1
94.336	1
3.3024	1
59.3408	1
132.557	1
85.1968	1
302.899	1
95.6416	1
66.2016	1
86.912	1
96.8704	1
78.5664	1
78.5152	1
100.326	1
65.408	1
215.808	1
55.808	1
94.5152	1
73.088	1
67.1488	1
147.123	1
165.453	1
100.685	1
32.4864	1
129.792	1
345.139	1
6.3232	1
81.0496	1
81.8176	1
190.131	1
136.781	1
61.3888	1
82.2272	1
130.432	1
78.3104	1
302.234	1
290.739	1
123.827	1
28.2368	1
103.014	1
105.933	1
480.922	1
6.8352	1
107.29	1
69.3504	1
252.16	1
80.128	1
10.0096	1
54.6816	1
130.202	1
131.738	1
65.6896	1
83.712	1
167.501	1
96.384	1
70.0928	1
50.304	1
219.136	1
52.2496	1
99.6352	1
73.344	1
7.6544	1
93.4912	1
52.7616	1
157.03	1
66.8416	1
124.083	1
63.488	1
98.5856	1
112.256	1
180.582	1
190.208	1
4.8384	1
62.9504	1
84.8384	1
52.4032	1
90.0096	1
68.8128	1
99.3024	1
123.597	1
226.022	1
100.07	1
130.33	1
115.123	1
109.798	1
119.219	1
66.9696	1
76.1088	1
80.768	1
101.478	1
45.44	1
145.408	1
65.5872	1
268.877	1
201.702	1
34.816	1
14.208	1
110.208	1
132.787	1
76.8	1
64.1536	1
180.07	1
114.739	1
163.2	1
192.461	1
92.1344	1
180.122	1
104.474	1
126.387	1
200.397	1
162.688	1
66.56	1
120.499	1
98.6624	1
49.0752	1
62.976	1
101.939	1
106.035	1
135.885	1
172.954	1
116.89	1
76.3904	1
162.278	1
3.584	1
71.808	1
77.0304	1
72.2432	1
103.603	1
349.005	1
152.883	1
106.061	1
221.338	1
93.2864	1
307.866	1
131.558	1
210.432	1
141.696	1
138.47	1
92.544	1
211.456	1
105.779	1
64.6912	1
66.3296	1
324.813	1
218.061	1
327.603	1
70.4	1
3.1232	1
4.5568	1
113.382	1
188.979	1
102.758	1
121.574	1
76.3392	1
161.459	1
39.296	1
202.547	1
65.152	1
140.134	1
288.896	1
137.344	1
109.389	1
113.126	1
82.2016	1
116.352	1
142.643	1
257.664	1
142.976	1
57.2672	1
196.89	1
110.31	1
99.1744	1
244.378	1
7.9616	1
127.104	1
82.8928	1
79.3856	1
175.744	1
89.7024	1
224.973	1
290.33	1
73.3952	1
104.243	1
57.472	1
58.0608	1
95.36	1
73.1136	1
148.557	1
174.618	1
82.6624	1
35.9936	1
76.8768	1
117.018	1
18.4576	1
1344.79	1
121.498	1
126.899	1
236.416	1
133.274	1
92.8256	1
99.2256	1
111.002	1
125.21	1
81.3568	1
120.806	1
5.12	1
204.16	1
133.171	1
88.7808	1
103.731	1
258.842	1
172.928	1
95.104	1
99.4304	1
136.422	1
106.547	1
85.7856	1
376.627	1
177.306	1
47.1552	1
280.602	1
286.413	1
139.75	1
81.536	1
2.7392	1
145.894	1
67.0976	1
89.3952	1
84.1472	1
106.675	1
81.2032	1
109.107	1
80.256	1
18.2272	1
232.755	1
88.2432	1
7.6032	1
57.088	1
337.126	1
164.608	1
218.803	1
140.928	1
72.1152	1
81.3568	1
108.621	1
133.248	1
72.2688	1
152.602	1
102.298	1
90.3424	1
66.5856	1
100.429	1
117.018	1
98.7904	1
155.955	1
746.342	1
79.104	1
229.837	1
225.766	1
92.1088	1
89.6512	1
163.098	1
100.966	1
50.816	1
66.8672	1
7.6288	1
66.9952	1
22.5024	1
48.9472	1
226.97	1
29.5936	1
59.8272	1
79.5392	1
73.6512	1
533.376	1
124.672	1
101.299	1
125.184	1
85.4784	1
58.5984	1
1384.78	1
117.965	1
137.267	1
121.754	1
68.992	1
329.011	1
150.989	1
119.296	1
137.114	1
101.069	1
86.8096	1
347.904	1
233.344	1
179.738	1
77.9008	1
63.8464	1
3.3024	1
249.6	1
95.2064	1
189.926	1
94.1568	1
314.112	1
166.81	1
[truncated: 20,761 more rows]

## Sheet: Fig 2C raw beads
droplet_area	repeat
77.4912	1
27.52	1
455.552	1
24.32	1
124.621	1
63.7696	1
3.6096	1
213.683	1
93.7216	1
47.7184	1
44.8768	1
37.376	1
33.2544	1
27.4944	1
80.0512	1
26.0096	1
55.1936	1
50.8928	1
156.467	1
56.1408	1
38.1184	1
28.16	1
26.8288	1
73.7536	1
27.648	1
114.611	1
33.3824	1
31.0784	1
117.325	1
94.976	1
22.0928	1
116.07	1
32.3584	1
217.958	1
27.1872	1
49.3824	1
247.578	1
58.1376	1
85.6064	1
26.8288	1
76.1856	1
36.1472	1
28.7488	1
45.6448	1
58.7776	1
39.1424	1
46.72	1
46.848	1
73.728	1
20.0704	1
33.9712	1
53.7344	1
88.9344	1
38.3744	1
99.7376	1
76.416	1
110.31	1
93.4912	1
128.768	1
36.9664	1
29.7472	1
36.3008	1
104.09	1
65.28	1
42.9056	1
37.2736	1
23.8336	1
113.075	1
36.9408	1
249.242	1
39.5008	1
33.408	1
110.925	1
31.0016	1
46.464	1
79.3344	1
34.4064	1
51.2256	1
81.2544	1
42.1632	1
34.5856	1
37.1456	1
52.608	1
33.0496	1
44.5952	1
118.938	1
23.936	1
28.5952	1
60.6464	1
35.6864	1
36.096	1
26.2912	1
45.2096	1
96.3328	1
34.7136	1
48.6656	1
48.8448	1
59.6992	1
55.2448	1
74.2912	1
52.2752	1
157.491	1
23.8336	1
38.1184	1
45.824	1
26.1888	1
50.7136	1
107.418	1
116.966	1
336.538	1
19.4304	1
16.7936	1
30.9248	1
25.9328	1
66.9696	1
56.2432	1
54.272	1
60.0832	1
104.218	1
40.0128	1
26.2912	1
48.3584	1
77.7472	1
48.256	1
92.672	1
72.5248	1
60.672	1
29.44	1
41.9072	1
35.5328	1
33.3056	1
42.112	1
45.1584	1
37.0432	1
40.1664	1
21.7344	1
33.1264	1
26.752	1
34.048	1
21.504	1
65.2032	1
48.768	1
107.238	1
47.0784	1
56.2176	1
34.9696	1
51.6352	1
31.616	1
69.1456	1
207.77	1
40.9856	1
35.8656	1
77.952	1
50.3808	1
91.1104	1
45.2608	1
88.7296	1
50.9184	1
44.2624	1
25.0112	1
24.576	1
97.536	1
71.4496	1
51.2768	1
35.2512	1
39.8336	1
56.448	1
85.6576	1
92.032	1
64.9728	1
40.0384	1
105.702	1
63.3088	1
44.8512	1
29.2608	1
32.0256	1
37.9904	1
34.688	1
355.123	1
57.3952	1
38.784	1
76.032	1
50.9696	1
44.6976	1
26.496	1
16.0768	1
60.288	1
89.9584	1
43.4432	1
70.3232	1
34.5856	1
64.4096	1
52.3776	1
105.114	1
32.4608	1
48.9216	1
33.3312	1
43.7504	1
33.408	1
68.7104	1
50.1248	1
88.32	1
71.936	1
148.224	1
45.2352	1
25.9584	1
69.2736	1
30.72	1
67.3536	1
41.4464	1
60.6976	1
29.1584	1
75.0848	1
122.035	1
32.6656	1
32.512	1
259.994	1
98.9952	1
59.8272	1
40.1664	1
66.1504	1
142.285	1
23.2192	1
59.5968	1
84.1216	1
36.9408	1
99.8144	1
74.7008	1
47.232	1
54.016	1
26.6752	1
27.0592	1
72.9856	1
58.0608	1
46.6688	1
66.7392	1
37.1968	1
29.2352	1
370.202	1
23.8592	1
33.3568	1
26.0352	1
38.656	1
39.0656	1
49.1264	1
44.7232	1
69.1456	1
38.784	1
57.0624	1
212.966	1
33.9456	1
44.0832	1
56.832	1
59.52	1
135.936	1
10.6496	1
48.896	1
26.1632	1
60.5696	1
77.2608	1
25.6256	1
24.32	1
133.53	1
34.56	1
32.8192	1
112.205	1
39.9104	1
73.0368	1
249.754	1
44.1856	1
27.3152	1
169.139	1
35.9424	1
137.651	1
75.2384	1
35.0208	1
192.41	1
103.117	1
40.576	1
70.4512	1
29.4912	1
24.6272	1
58.1632	1
77.5936	1
25.9584	1
44.7488	1
36.8128	1
78.4896	1
37.248	1
81.6128	1
33.7408	1
44.5696	1
119.45	1
27.3664	1
59.5712	1
36.2496	1
478.438	1
50.4064	1
68.8128	1
104.576	1
37.6064	1
67.1488	1
26.3424	1
16.3072	1
63.744	1
96.9728	1
32.6912	1
26.2912	1
158.541	1
1893.32	1
270.976	1
38.2976	1
42.0352	1
34.56	1
34.7392	1
38.9632	1
92.5184	1
86.8096	1
37.7856	1
46.4384	1
307.866	1
106.266	1
39.68	1
100.096	1
35.0976	1
8.1664	1
21.5552	1
124.288	1
56.832	1
114.099	1
41.1392	1
53.3248	1
16.7168	1
23.5264	1
36.0192	1
100.198	1
109.414	1
32.3584	1
40.2944	1
36.1728	1
33.5104	1
379.853	1
23.04	1
24.96	1
58.88	1
86.8096	1
36.8384	1
48.7168	1
39.7312	1
79.8464	1
23.5008	1
47.4112	1
26.752	1
38.5792	1
39.1936	1
53.5552	1
91.5968	1
61.696	1
28.4928	1
106.035	1
26.9568	1
31.1808	1
20.5312	1
44.8	1
98.56	1
59.2128	1
41.0112	1
49.5872	1
99.1488	1
46.5152	1
65.2544	1
91.1104	1
34.3552	1
25.0624	1
21.5552	1
31.6672	1
44.1344	1
63.0528	1
111.437	1
70.8352	1
54.2208	1
21.5808	1
32.64	1
83.9168	1
28.7744	1
183.629	1
101.376	1
32.7936	1
10.5216	1
99.3024	1
32.9984	1
32.512	1
50.8416	1
35.5584	1
38.784	1
145.075	1
78.4896	1
75.2128	1
212.454	1
23.5264	1
23.552	1
48.4608	1
42.1888	1
32.1024	1
80.9728	1
26.624	1
48.9728	1
24.7808	1
59.52	1
44.9024	1
55.4752	1
42.4448	1
26.1376	1
53.8624	1
22.8864	1
36.736	1
25.7536	1
35.3792	1
94.8224	1
77.5936	1
27.648	1
39.168	1
77.7728	1
66.2016	1
37.1456	1
49.5616	1
62.5664	1
35.8144	1
34.9952	1
177.869	1
103.04	1
82.0992	1
1755.52	1
30.1312	1
50.2528	1
27.1872	1
51.456	1
26.2656	1
32.2816	1
27.0592	1
23.3216	1
34.6112	1
24.6528	1
37.7344	1
55.808	1
98.048	1
38.8096	1
65.664	1
35.0976	1
34.7904	1
83.7632	1
27.2896	1
49.0752	1
77.8496	1
143.693	1
34.7392	1
103.757	1
86.1696	1
41.8048	1
82.2272	1
37.76	1
35.2512	1
69.2736	1
33.9456	1
182.17	1
33.8688	1
81.2288	1
35.9424	1
29.0304	1
74.1376	1
25.1136	1
270.541	1
61.696	1
22.4256	1
66.1248	1
47.2832	1
38.8096	1
105.472	1
130.458	1
58.9824	1
70.528	1
34.8928	1
22.6304	1
58.2144	1
101.683	1
37.4784	1
26.9568	1
34.56	1
136.755	1
47.8464	1
567.424	1
33.5872	1
380.621	1
92.8768	1
689.152	1
64.8704	1
190.029	1
123.546	1
39.5008	1
57.1392	1
55.1936	1
39.5008	1
47.3088	1
113.664	1
68.8384	1
48.64	1
42.3168	1
86.4512	1
48.7936	1
139.853	1
40.832	1
45.1584	1
146.355	1
457.062	1
37.376	1
37.7344	1
34.7136	1
290.688	1
25.3696	1
143.77	1
26.0352	1
53.6064	1
66.2784	1
33.28	1
30.8992	1
21.7856	1
115.661	1
137.882	1
493.261	1
63.1808	1
68.1216	1
29.9008	1
56.3456	1
46.0288	1
50.6112	1
58.752	1
51.2256	1
44.3904	1
48.2304	1
34.3296	1
38.8352	1
51.0976	1
39.5008	1
24.6784	1
80.3584	1
128.563	1
41.8304	1
35.968	1
31.36	1
85.2736	1
53.7344	1
35.712	1
93.824	1
54.3744	1
39.4752	1
70.5024	1
738.509	1
54.7584	1
37.9648	1
52.608	1
34.9696	1
116.019	1
31.616	1
161.613	1
57.9584	1
81.92	1
42.0096	1
64.4352	1
55.0144	1
115.661	1
65.664	1
56.2176	1
37.6832	1
30.8992	1
46.0288	1
43.2896	1
51.9168	1
37.12	1
28.0832	1
37.0176	1
66.4576	1
32.1536	1
532.685	1
71.5264	1
287.539	1
113.331	1
207.667	1
25.9328	1
111.206	1
36.2496	1
23.296	1
24.832	1
174.285	1
58.3168	1
25.8816	1
305.741	1
93.0816	1
36.6336	1
12.6464	1
116.019	1
37.376	1
34.432	1
43.264	1
156.826	1
35.2	1
37.1456	1
177.69	1
28.1088	1
38.8096	1
101.146	1
34.5088	1
129.126	1
41.7536	1
143.309	1
88.3968	1
64.3072	1
32.7424	1
269.85	1
23.552	1
291.379	1
45.0816	1
63.6672	1
107.494	1
78.1824	1
55.0912	1
24.9088	1
57.7024	1
82.0224	1
31.744	1
37.4272	1
71.424	1
24.2944	1
145.459	1
34.7392	1
85.6576	1
393.267	1
73.5232	1
43.5712	1
262.989	1
29.4144	1
68.9152	1
62.6176	1
43.2896	1
42.9056	1
100.096	1
30.464	1
26.2912	1
44.4928	1
35.4816	1
69.2992	1
70.1952	1
43.2128	1
59.8272	1
84.224	1
46.7712	1
42.7264	1
476.902	1
45.1584	1
31.8208	1
35.7376	1
63.7696	1
35.84	1
41.6768	1
33.3056	1
727.706	1
81.5104	1
36.8384	1
72.704	1
147.302	1
28.544	1
94.8736	1
51.328	1
70.2464	1
44.7744	1
182.118	1
33.28	1
48.9728	1
635.878	1
99.0208	1
50.7136	1
80.384	1
55.2704	1
43.6992	1
54.144	1
158.054	1
46.9248	1
44.2368	1
44.9792	1
23.7568	1
57.4976	1
65.3568	1
663.04	1
35.1744	1
24.7808	1
295.424	1
589.978	1
37.3504	1
44.672	1
25.2928	1
210.176	1
48.1792	1
46.208	1
441.062	1
757.197	1
25.9072	1
45.8752	1
117.862	1
37.0432	1
33.8432	1
28.3136	1
80.4864	1
197.376	1
35.0464	1
125.824	1
76.6208	1
128.64	1
185.37	1
37.5296	1
27.392	1
114.406	1
26.8544	1
34.2272	1
43.5456	1
73.344	1
28.032	1
50.6368	1
62.4128	1
114.534	1
44.288	1
68.5056	1
94.7456	1
45.1072	1
137.37	1
56.064	1
163.866	1
53.632	1
53.1712	1
34.7392	1
105.165	1
45.0816	1
41.4208	1
54.8096	1
65.1008	1
49.5616	1
39.1168	1
108.493	1
55.0144	1
79.5392	1
39.6544	1
24.4224	1
24.6016	1
33.8432	1
101.888	1
81.9968	1
81.7152	1
42.3424	1
24.192	1
37.4272	1
33.1776	1
98.816	1
282.189	1
26.0096	1
24.6016	1
40.9088	1
27.392	1
47.616	1
27.1872	1
74.9056	1
186.163	1
52.7104	1
35.2512	1
34.944	1
62.2592	1
149.043	1
97.1008	1
15.6416	1
44.8	1
89.7792	1
39.6032	1
60.4928	1
50.9184	1
15.9232	1
81.5872	1
37.4784	1
53.9904	1
27.0848	1
43.5968	1
49.152	1
60.8	1
25.6768	1
79.9232	1
33.28	1
378.368	1
28.4928	1
63.4624	1
47.4368	1
119.475	1
33.024	1
33.9456	1
37.1456	1
108.16	1
33.664	1
72.3456	1
65.0752	1
49.5104	1
37.0176	1
73.9072	1
99.584	1
37.7088	1
34.2784	1
133.35	1
32.4096	1
26.2144	1
37.3504	1
78.848	1
60.544	1
38.016	1
27.9552	1
29.1584	1
75.776	1
58.8544	1
40.2688	1
101.53	1
32.7424	1
80.4096	1
43.52	1
48.512	1
42.4448	1
33.3824	1
148.608	1
55.6288	1
31.8976	1
31.3088	1
147.021	1
45.824	1
40.8832	1
70.656	1
106.726	1
134.118	1
43.7248	1
22.3744	1
57.7024	1
24.3712	1
82.2016	1
115.738	1
38.0416	1
40.8832	1
99.3536	1
63.8976	1
33.4848	1
107.238	1
140.058	1
33.3312	1
13.568	1
24.5248	1
36.352	1
25.1392	1
50.2784	1
40.4736	1
35.9936	1
122.982	1
71.808	1
22.9632	1
61.6192	1
119.552	1
68.5056	1
25.5488	1
32.4608	1
72.9344	1
45.4656	1
34.2784	1
24.832	1
71.6544	1
127.155	1
48.2048	1
52.6592	1
56.8576	1
55.1424	1
87.4752	1
108.109	1
39.8592	1
24.6016	1
22.4768	1
44.4928	1
14.2592	1
141.286	1
40.5248	1
68.608	1
48.1024	1
31.5904	1
32.64	1
31.2832	1
86.7328	1
237.44	1
48.3584	1
84.4544	1
55.296	1
25.1904	1
33.2032	1
66.5856	1
32.512	1
33.5872	1
43.5712	1
22.7584	1
41.6	1
22.5024	1
29.824	1
22.2464	1
19.1232	1
10.5216	1
7.0656	1
117.427	2
22.784	2
10.9824	2
11.5968	2
26.4448	2
20.0448	2
176.41	2
26.88	2
6.7072	2
55.7056	2
48.9216	2
31.1552	2
23.296	2
19.1488	2
32.6144	2
89.7536	2
153.139	2
25.0112	2
40.4736	2
39.0912	2
56.2176	2
22.0416	2
38.0416	2
53.6576	2
29.9776	2
33.92	2
44.8	2
26.1632	2
41.4464	2
98.2528	2
62.1824	2
45.44	2
45.312	2
34.8928	2
140.39	2
53.4784	2
60.8768	2
55.9872	2
33.4592	2
25.728	2
27.0336	2
32.6656	2
44.4416	2
39.8336	2
84.1728	2
45.2352	2
83.9168	2
42.752	2
62.1568	2
24.704	2
53.9136	2
38.8864	2
8.8064	2
36.2752	2
67.0976	2
57.6	2
33.7152	2
12.9024	2
91.136	2
66.7648	2
22.2464	2
312.064	2
52.0192	2
66.304	2
57.7024	2
41.984	2
64.4096	2
192.589	2
51.3024	2
92.544	2
54.4512	2
25.9072	2
38.5024	2
44.0832	2
24.2176	2
45.2352	2
31.36	2
23.552	2
65.5872	2
24.3712	2
322.867	2
53.6064	2
29.7728	2
143.309	2
26.6752	2
28.2368	2
68.2752	2
52.352	2
31.5136	2
72.064	2
24.6016	2
64.8704	2
65.6896	2
35.1232	2
27.5456	2
22.8608	2
32.6656	2
28.4928	2
41.3696	2
33.664	2
44.9536	2
48.0768	2
120.755	2
13.7216	2
83.2256	2
1082.55	2
51.4048	2
610.714	2
68.2496	2
44.4928	2
70.2464	2
25.4464	2
332.416	2
96.6912	2
28.6208	2
67.2512	2
74.9568	2
101.299	2
39.5264	2
75.264	2
63.872	2
73.1648	2
31.7696	2
879.027	2
79.9232	2
42.752	2
26.5728	2
711.629	2
80.8192	2
62.2848	2
39.7056	2
133.709	2
726.554	2
2165.22	2
53.504	2
46.8736	2
47.7696	2
63.9232	2
59.3664	2
59.5456	2
409.498	2
36.992	2
31.488	2
29.5936	2
80.7168	2
52.096	2
48.8448	2
87.3728	2
38.2976	2
121.216	2
35.0208	2
17.1264	2
24.96	2
32.896	2
23.1424	2
38.0928	2
18.1248	2
20.608	2
26.1376	2
58.3936	2
24.8576	2
1587.15	2
37.7088	2
23.6544	2
31.9488	2
10.9568	2
25.8304	2
68.3008	2
72.3456	2
58.496	2
50.304	2
48.8448	2
44.672	2
40.9088	2
34.2784	2
91.5968	2
32.5376	2
45.44	2
49.2544	2
51.4816	2
850.406	2
71.1936	2
40.5504	2
61.6704	2
38.6816	2
42.0096	2
91.4432	2
398.515	2
156.186	2
45.3632	2
101.222	2
26.112	2
24.0128	2
30.6176	2
64.5888	2
29.9776	2
10.3168	2
221.491	2
35.6864	2
23.0912	2
13.7216	2
79.5136	2
33.1264	2
68.1984	2
42.4704	2
46.8224	2
60.2112	2
106.342	2
61.5168	2
31.9744	2
49.7152	2
32.8448	2
33.4336	2
32.9216	2
36.3008	2
148.506	2
14.1568	2
39.68	2
426.982	2
119.578	2
24.6272	2
118.963	2
31.5136	2
76.3648	2
41.3952	2
45.7472	2
31.6928	2
23.6544	2
21.5552	2
93.7984	2
55.808	2
48.3328	2
242.765	2
48.9216	2
1371.98	2
219.904	2
651.93	2
228.634	2
183.424	2
34.0224	2
664.883	2
45.5936	2
48.1536	2
76.544	2
810.726	2
83.6096	2
137.011	2
237.926	2
101.018	2
32.768	2
12.544	2
4483.48	2
40.4992	2
10.2144	2
53.9392	2
43.8784	2
10.9824	2
34.5344	2
34.7136	2
33.024	2
49.0496	2
41.6512	2
68.5056	2
24.7296	2
15.6416	2
200.474	2
43.5712	2
376.269	2
31.616	2
41.4208	2
2026.44	2
20.1984	2
1519	2
1435.44	2
46.9248	2
36.5056	2
510.387	2
33.92	2
47.8464	2
36.4544	2
687.693	2
21.888	2
19.7888	2
36.5824	2
43.1104	2
56.2176	2
30.6688	2
128.23	2
33.92	2
33.4336	2
79.6928	2
55.3728	2
90.3168	2
53.5296	2
39.9616	2
22.7584	2
33.3056	2
30.6688	2
38.2208	2
7707.01	2
58.3424	2
33.6128	2
20.8128	2
24.9344	2
35.3536	2
219.827	2
82.3296	2
703.514	2
25.1904	2
1031.94	2
50.1248	2
44.288	2
3828.94	2
29.1584	2
25.5744	2
89.7792	2
32.4096	2
33.536	2
22.6304	2
25.9584	2
4451.25	2
1165.47	2
46.4896	2
39.9872	2
13.824	2
32.6656	2
79.0528	2
22.0928	2
4667.7	2
28.7488	2
28.1088	2
47.744	2
26.368	2
54.0928	2
40.8576	2
17.8176	2
42.7008	2
71.7568	2
1065.27	2
55.1168	2
224.563	2
29.8496	2
35.0464	2
27.1872	2
29.0304	2
444.006	2
37.2224	2
1911.19	2
1003.44	2
27.5712	2
33.664	2
39.808	2
45.2352	2
953.088	2
30.2336	2
21.5552	2
3127.04	2
28.6208	2
23.808	2
315.904	2
102.298	2
20.7872	2
69.632	2
18.1248	2
1163.57	2
78.0544	2
52.8384	2
34.1248	2
13.7472	2
37.2224	2
37.12	2
53.0176	2
22.5024	2
28.288	2
71.3216	2
38.6816	2
31.3344	2
50.0736	2
61.44	2
36.864	2
22.144	2
51.3536	2
30.1568	2
369.51	2
46.0032	2
71.8592	2
50.9952	2
27.0336	2
1597.11	2
2608	2
33.1264	2
269.261	2
42.88	2
74.0864	2
22.016	2
19.84	2
22.5024	2
229.581	2
40.0128	2
32.0512	2
35.456	2
31.3088	2
32.9472	2
30.1312	2
29.4656	2
670.925	2
31.616	2
409.856	2
436.454	2
22.2464	2
561.357	2
20.7872	2
4181.58	2
35.6608	2
121.83	2
218.368	2
2008.76	2
30.8736	2
39.8336	2
45.6192	2
23.552	2
79.6416	2
677.939	2
30.2848	2
20.1728	2
615.962	2
34.7136	2
43.4944	2
30.976	2
35.712	2
55.296	2
46.0032	2
31.3344	2
984.371	2
41.4976	2
70.4	2
1516.13	2
618.112	2
22.5024	2
470.758	2
23.3472	2
50.432	2
29.9264	2
21.4784	2
1615.31	2
48.9984	2
226.099	2
22.528	2
13.3376	2
31.36	2
22.9888	2
30.336	2
40.576	2
29.0048	2
29.9008	2
32.6656	2
23.1168	2
42.0352	2
26.3424	2
29.6448	2
282.086	2
38.3744	2
122.982	2
520.653	2
35.456	2
663.552	2
82.5344	2
3096.52	2
206.976	2
26.7008	2
24.3712	2
39.2192	2
37.6576	2
36.9152	2
26.4704	2
43.52	2
44.5952	2
24.1408	2
498.995	2
37.2224	2
15.2832	2
2489.06	2
472.909	2
20.736	2
67.7888	2
424.448	2
139.418	2
5889	2
17.4336	2
62.0288	2
24.2432	2
220.979	2
281.702	2
46.7968	2
41.7792	2
76.416	2
27.7504	2
695.168	2
30.2336	2
35.328	2
31.2832	2
1271.65	2
41.4464	2
56.9344	2
16.9728	2
22.1184	2
33.92	2
46.2592	2
17.3312	2
9.3184	2
32.4864	2
92.5696	2
458.24	2
30.8224	2
33.92	2
40.7552	2
1111.07	2
49.8688	2
31.4368	2
27.904	2
308.147	2
23.9872	2
31.8976	2
480.589	2
26.3424	2
9.8304	2
1127.19	2
25.1648	2
352.384	2
27.2896	2
226.099	2
4259.05	2
1372.52	2
2987.03	2
12.8256	2
26.5984	2
22.3744	2
22.6048	2
28.6976	2
33.28	2
35.5584	2
16.2304	2
349.952	2
22.8096	2
50.6112	2
507.238	2
314.726	2
36.5312	2
19.6608	2
36.1984	2
12.5696	2
39.3472	2
46.9248	2
18.56	2
767.846	2
397.107	2
29.6704	2
682.419	2
16.896	2
34.5856	2
47.3856	2
171.264	2
20.3776	2
128.358	2
33.408	2
5.888	2
3008.64	3
366.285	3
1157.04	3
505.088	3
137.856	3
84.1728	3
32.6144	3
38.1696	3
28.3136	3
27.8784	3
10.752	3
10.3424	3
367.923	3
45.312	3
19.9936	3
42.6496	3
107.494	3
42.3936	3
1205.89	3
117.427	3
32.5376	3
1599.74	3
34.5344	3
49.9968	3
1997.93	3
25.8048	3
28.2368	3
28.288	3
3225.27	3
25.7792	3
19.1232	3
126.95	3
20.7872	3
259.046	3
68.2752	3
10.2912	3
21.2224	3
21.888	3
4293.02	3
2381.47	3
29.8752	3
38.3488	3
10721.5	3
42.1632	3
24.1408	3
21.1456	3
26.4448	3
21.0432	3
25.8304	3
28.6208	3
53.76	3
395.571	3
12.4416	3
19.1488	3
48.128	3
49.5104	3
10.3168	3
29.1072	3
226.099	3
717.67	3
366.618	3
93.2864	3
608.845	3
118.579	3
410.957	3
19.84	3
30.4128	3
4746.96	3
62.6944	3
17.1264	3
11.136	3
39.7056	3
256.819	3
226.099	3
635.187	3
424.781	3
327.731	3
717.747	3
8847.16	3
14.1056	3
24.2944	3
19.2512	3
29.44	3
19.0976	3
16.6912	3
36.608	3
28.2112	3
23.6288	3
17.6384	3
22.1952	3
39.7312	3
32.1536	3
20.0192	3
1549.75	3
226.099	3
27.1616	3
8.8064	3
18.9184	3
11.1104	3
43.264	3
12.1344	3
12.7488	3
17.8432	3
20.3008	3
1935.16	3
1981.21	3
6896.23	3
160.922	3
19.0976	3
25.9328	3
1205.96	3
354.33	3
650.803	3
27.7504	3
21.8624	3
38.7584	3
63.1552	3
26.6496	3
25.1904	3
44.288	3
427.827	3
9.216	3
31.5136	3
24.7552	3
21.1456	3
9.5232	3
26.624	3
23.0144	3
26.2656	3
508.493	3
26.496	3
18.2016	3
35.6096	3
15.4368	3
74.1632	3
19.9168	3
8594.48	3
7.3472	3
539.622	3
17.6896	3
252.544	3
23.424	3
21.7088	3
230.963	3
8.32	3
39.3472	3
13.8496	3
2877.88	3
229.862	3
16.9984	3
39.8592	3
30.3616	3
29.9008	3
378.24	3
307.021	3
23.9616	3
27.52	3
18.048	3
26.3424	3
14.2848	3
18.6624	3
19.4048	3
51.8144	3
40.0896	3
395.776	3
46.08	3
26.0608	3
5805.75	3
17.8944	3
34.5856	3
17.2032	3
2467.4	3
22.7328	3
228.429	3
17.5616	3
17.408	3
15.5648	3
25.9328	3
18.688	3
21.9904	3
17.9968	3
30.8224	3
18.1248	3
11.6224	3
18.1504	3
226.099	3
10.4448	3
1838.64	3
26.368	3
41.1648	3
33.3568	3
10.5984	3
23.4752	3
20.6336	3
434.304	3
26.5216	3
18.2784	3
10.7776	3
27.0592	3
30.0288	3
25.7792	3
231.782	3
1268.71	3
25.8048	3
46.3616	3
382.336	3
21.7856	3
28.6208	3
15.2576	3
35.328	3
226.099	3
9183.85	3
17.9712	3
21.9392	3
766.182	3
36.352	3
11.8784	3
14.4128	3
25.6	3
21.1456	3
340.582	3
57.7792	3
46.6688	3
31.3088	3
16.4608	3
850.381	3
19.584	3
34.1504	3
612.326	3
17.3312	3
32.768	3
13.7472	3
22.7584	3
7.68	3
445.568	3
29.9264	3
18.0224	3
8.2688	3
22.528	3
26.88	3
890.24	3
309.581	3
47.104	3
316.288	3
15.5392	3
7.2192	3
17.7664	3
35.84	3
32.6656	3
312.474	3
10.0608	3
21.2992	3
394.854	3
226.611	3
10.0864	3
1874.69	3
451.686	3
42.6496	3
20.6592	3
18.4576	3
40.2432	3
460.365	3
16.384	3
9.2928	3
3395.58	3
28.7232	3
51.6352	3
45.6192	3
47.4624	3
17.6896	3
24.6016	3
37.6064	3
29.3632	3
19.2512	3
9.7024	3
280.141	3
13.7984	3
13.6192	3
3731.84	3
23.168	3
33.664	3
7.7568	3
8.0128	3
13.4144	3
9.1648	3
6.9888	3
9.1648	3
14.7968	3
12.7488	3
15.4368	3
1053.34	3
16.9216	3
4.8896	3
15.4368	3
1705.93	3
54.2976	3
5.0432	3
5.8624	3
5.12	3
25.7024	3
7.68	3
7.4496	3
8.7808	3
10.752	3
14.592	3
12.544	3
30.6432	3
358.733	3
30.0032	3
25.2672	3
7885.82	3
518.656	3
8.0896	3
226.099	3
6.2208	3
30.2336	3
35.6864	3
23.6544	3
5.8112	3
9.344	3
47.1296	3
11.1616	3
18.9952	3
599.501	3
29.4912	3
1271.01	3
16.7936	3
30.336	3
2.8928	3
24.32	3
8.1664	3
8.2432	3
12.8256	3
28.8768	3
76.8	3
36.7104	3
27.6992	3
15.5136	3
6.528	3
9.216	3
6.7584	3
10.88	3
31.8976	3
14.336	3
29.1072	3
1087.05	3
24.064	3
4.8128	3
9.088	3
9.088	3
35.6864	3
13.4656	3
29.696	3
12.5696	3
110.438	3
22.656	3
11.0592	3
23.9872	3
8.9344	3
1375.67	3
10.0864	3
6.3232	3
12.9024	3
17.8944	3
619.597	3
22.6048	3
16.6912	3
36.352	3
4.9408	3
17.7152	3
28.5696	3
5.1968	3
9.5488	3
49.3056	3
15.36	3
35.0976	3
4.096	3
9.856	3
19.2256	3
8.0384	3
6.0928	3
5.376	3
24.0384	3
8.8832	3
7.6032	3
31.8464	3
3.712	3
21.0688	3
9.5488	3
18.8672	3
153.216	3
28.416	3
677.427	3
9.5744	3
10.8032	3
29.312	3
9.9584	3
18.5088	3
8.704	3
4014.95	3
867.149	3
19.5072	3
26.9824	3
15.8464	3
11.2896	3
25.2672	3
9.9072	3
17.1264	3
9.344	3
7.808	3
8.6016	3
5.6832	3
7.2192	3
18.1504	3
17.8688	3
8.8064	3
2708.61	3
13.2608	3
133.325	3
6.2208	3
22.8096	3
137.37	3
5.9904	3
15.5648	3
6.272	3
789.837	3
15.744	3
5.0432	3
18.688	3
4.7616	3
17.8432	3
24.4736	3
6.4	3
187.315	3
14.5408	3
18.0224	3
6.016	3
45.2864	3
29.6192	3
12.0576	3
5.888	3
6.8096	3
72.8064	3
1444.99	3
79.2064	3
8.064	3
11.8272	3
18.7904	3
4887.35	3
508.314	3
233.574	3
11.6224	3
5.8112	3
6.784	3
9.9328	3
18.9696	3
8.96	3
4.7616	3
1052.36	3
23.3216	3
9.6	3
19.9424	3
32.5376	3
508.826	3
41.1648	3
19.328	3
4.48	3
10.8032	3
5.9136	3
136.474	3
20.0704	3
68.1984	3
17.152	3
9.216	3
18.2784	3
19.84	3
13.7216	3
13.9264	3
226.099	3
14.3104	3
10.0096	3
29.4144	3
15.488	3
19.6096	3
20.0448	3
8.3968	3
16.5888	3
1293.21	3
16.3328	3
23.7568	3
468.941	3
22.2464	3
12.3136	3
19.3536	3
15.3088	3
5.3248	3
17.6896	3
11.6992	3
210.15	3
17.2544	3
25.2672	3
10.752	3
14.08	3
20.3776	3
29.4144	3
5.8368	3
8.32	3
11.2896	3
24.064	3
6.2976	3
30.7712	3
13.2864	3
15.872	3
15.1808	3
5.504	3
13.5936	3
17.0496	3
8.8064	3
29.312	4
3.8656	4
49.6128	4
28.1088	4
[truncated: 4,690 more rows]

## Sheet: Fig 2D raw p putida
droplet_area	cell_area
1604.99	149.99
15.3344	0
145.254	11.904
70.8352	4.8128
30.72	0.8192
119.936	11.776
62.1824	2.2272
51.2	5.0944
28.5952	0.896
195.763	13.3632
132.506	10.8544
96.6656	9.472
3.7632	0
228.531	25.3952
11.0848	0
13.0816	0
110.848	5.6576
66.0224	2.7648
62.1824	5.2736
110.95	5.8368
105.242	4.9152
79.488	4.3264
123.648	12.928
49.5104	4.6592
162.611	0
78.7968	6.4768
4.5056	0
7.3984	0
146.048	5.9136
96.128	7.0144
63.4112	1.8432
1122.36	88.1664
511.309	44.3904
144.717	16.2304
138.138	7.7056
53.9904	1.8688
5.76	0.1536
76.8	6.5024
171.597	13.5936
15.5648	0
136.883	8.6016
73.3952	6.3744
417.126	32.9472
172.288	7.424
104.96	2.432
112.102	6.2464
66.8672	5.3248
299.955	31.1552
164.326	5.3248
261.171	14.8224
120.525	8.6272
50.8672	2.8416
91.6736	7.5776
82.0224	8.4224
65.7152	3.2768
4.4544	0.2048
99.7376	7.4752
59.3664	4.4288
84.9408	7.1936
66.0992	2.9952
4.5824	0
71.4752	6.3744
320.41	20.3264
90.9568	4.608
385.51	36.864
146.304	16.3328
111.949	10.9056
41.5488	1.664
163.994	13.9264
6.2208	0
320.87	32
100.07	7.0144
205.85	14.7968
97.6128	3.7376
135.168	9.088
153.037	11.776
61.3888	3.968
477.824	42.2912
116.608	10.24
117.171	6.8352
95.1808	8.4736
182.989	14.1056
130.867	16.3072
249.882	17.408
94.9504	7.3472
103.142	4.1984
247.808	11.9552
104.294	7.8592
86.784	6.1184
120.499	8.704
117.683	9.2672
81.3568	3.072
92.8768	7.0144
58.0352	4.8896
57.8304	2.4832
35.1488	3.1488
94.8992	2.4576
183.45	14.2848
74.9312	5.12
57.8816	1.9968
70.528	5.1968
190.413	13.0304
46.0032	2.6112
75.0592	6.1696
211.226	13.4912
77.9008	7.1424
115.917	4.608
213.35	21.2224
69.376	4.1728
96.5888	7.8336
166.118	17.5616
169.549	12.4928
107.827	9.2928
64.2816	4.7104
71.6544	3.6352
114.048	6.016
94.2592	2.3296
178.842	16.5888
81.7664	7.0144
327.168	28.672
173.133	13.0304
70.6048	2.0992
85.376	5.4016
89.5232	7.6544
76.9024	5.6832
107.827	4.2496
183.424	3.7632
109.594	7.5008
97.7664	4.3008
28.16	1.5872
173.798	20.7872
121.549	9.3696
72.4224	3.328
96.256	6.6304
81.5616	5.7088
117.734	9.2928
81.8688	7.1936
418.842	42.112
2.7136	0
107.802	7.4496
136.038	6.4768
64.384	5.0944
1395.15	96.384
573.824	43.3152
138.086	15.6416
151.731	12.3904
83.7376	2.5856
68.7104	3.968
370.074	49.3824
150.758	13.312
59.648	5.5296
46.0288	1.7664
47.8208	5.9136
138.445	10.2144
51.5584	2.6368
81.8432	4.4032
229.376	15.9232
19.456	3.0464
2.816	0
86.4768	4.8896
3.7888	0
262.912	27.0592
87.5776	6.6304
3.9424	0
92.1344	6.5536
81.4848	9.1648
270.95	22.7072
84.4032	5.4016
26.8288	1.5872
115.686	5.9136
59.9808	4.352
135.27	11.0848
3.8144	0
284.979	32.0256
51.8144	2.688
113.946	5.6832
137.984	11.2896
194.483	13.3632
91.8784	7.3728
84.096	6.144
67.2512	5.0688
96.4096	8.6528
155.136	13.9008
145.254	15.1808
3.3792	0
78.336	5.0688
94.336	7.5264
127.258	8.1408
7.1168	1.4336
95.8464	8.2944
163.405	14.7456
40.9344	1.792
90.7776	7.5776
66.3808	4.5312
125.926	10.4448
63.9744	3.0464
124.083	13.3632
371.558	36.0448
45.1072	1.5104
105.242	8.3712
112	5.5552
40.448	3.9424
159.59	15.36
50.5088	3.328
85.248	9.0368
2.7904	0
136.448	16.2816
126.771	11.6736
81.6128	6.656
37.6832	0.3328
81.1776	6.4256
2.6112	0
40.0128	1.8432
79.0528	2.9696
163.84	21.6832
112.794	7.0912
75.1872	5.0944
97.2544	3.968
202.291	19.9936
75.52	4.5568
231.91	20.992
4.1728	0
42.5472	1.8176
259.379	31.8208
124.083	14.3104
149.862	11.7504
92.544	7.0912
62.976	2.56
136.038	10.112
67.2768	5.1712
136.602	13.1328
92.416	3.072
301.286	14.5408
118.195	3.5328
193.997	19.5328
75.1616	6.6816
39.8848	1.2288
124.467	10.9824
38.016	1.9456
62.6176	3.6608
118.477	7.3984
299.648	25.1392
76.544	4.224
74.8288	4.352
172.646	21.0176
103.168	8.7296
222.592	13.1072
3.2512	0
19.3792	0.64
154.342	18.9952
2387.94	177.715
73.6768	4.864
67.1488	4.0704
81.3312	6.144
83.9936	6.5792
52.3008	2.56
124.262	7.424
66.3296	4.1728
94.592	6.4768
4089.55	62.2592
89.5232	7.3472
184.704	24.448
3.328	0
155.366	13.4912
3.5328	0
258.995	21.5552
191.846	9.2416
224.384	22.0416
84.352	3.2512
10.7264	2.4832
4.224	0
66.1504	2.944
90.9056	9.5744
165.171	12.3136
84.9664	5.3248
348.083	40.2944
136.09	11.3664
11.264	1.5616
97.6384	7.5776
112.563	9.0624
80.0512	4.2496
84.9152	4.0192
83.2512	4.0192
228.122	15.0272
118.554	9.8304
86.9376	5.4016
102.784	9.2672
80.3328	5.632
97.6128	6.7584
41.6256	1.5616
85.5296	7.808
82.8928	4.5568
76.0064	4.4544
226.458	27.6992
3.3792	0
1113.65	85.6832
3.3536	0
95.6672	6.1184
170.163	15.9232
106.88	8.0896
81.7408	7.5776
253.645	17.9456
187.085	20.6848
89.1392	7.8848
124.698	9.7024
90.112	5.6832
141.389	11.52
146.918	11.4432
94.2336	5.9392
137.523	9.856
818.637	13.0304
81.8688	5.888
89.2672	6.2208
65.5872	5.0944
3.9168	0
67.4048	3.5072
149.606	20.9664
295.552	23.2448
82.6624	7.7824
189.21	5.4528
74.9824	6.0672
89.856	5.248
428.8	34.9952
176.563	4.6592
223.462	19.0208
98.0992	8.4224
52.0704	1.8432
15.1552	0
131.533	7.5776
3.328	0
254.106	21.4272
154.342	16.7168
271.334	19.328
113.715	7.808
125.491	5.9904
720.947	65.024
105.267	6.656
5.7344	0
109.466	7.296
66.7648	4.2496
146.688	6.1184
40.7808	1.408
69.76	4.1728
182.118	24.1152
23.3984	5.9392
406.298	26.9312
80.6912	4.3008
26.8544	1.6384
78.4384	6.8608
111.923	8.6528
164.634	21.504
188.698	12.2112
71.2192	2.944
115.328	10.1376
111.334	10.4448
46.3616	4.7616
111.462	8.1152
6.912	0.5632
163.994	15.8976
47.0016	2.7392
318.387	40.9856
94.7968	6.528
60.1344	2.1504
91.4432	5.2224
92.9792	7.552
89.7792	7.1424
87.1168	5.7856
45.9264	1.9712
112.512	8.32
86.8864	5.12
59.1872	6.0416
61.2608	4.8384
62.336	4.0704
69.376	4.9408
1196.54	117.734
123.085	1.6384
60.288	2.7136
113.152	5.5808
255.744	33.152
65.8432	6.7072
96.512	5.9904
258.611	38.0672
36.736	1.8688
7.3472	0
45.4144	0
123.571	10.0096
69.0176	6.2464
109.645	7.168
138.01	8.4224
94.7712	5.6832
274.253	35.2
121.242	9.2416
54.2464	2.7648
77.0048	0.3328
7.7824	1.3568
231.27	8.6016
143.898	6.7584
86.4768	6.1184
3.456	0
500.198	19.2768
60.8768	4.1984
151.782	15.0784
262.195	18.4576
151.834	9.9072
85.7344	3.8656
58.24	5.5808
105.728	2.2784
93.9008	7.1936
69.12	2.432
2.9952	0
36.6592	4.864
115.328	5.0944
191.744	12.4928
128.435	9.7792
30.7968	2.8416
48.5632	6.912
50.2528	4.1216
3.8144	0
67.3536	5.4016
95.488	5.2224
93.44	8.3456
73.8304	5.1456
84.0448	6.5536
57.728	3.6608
91.3664	5.888
45.2608	1.3568
58.2912	4.4288
85.6576	5.7856
123.392	10.6752
3.6864	0
106.24	6.1184
3.6608	0
164.557	7.3472
3.0464	0
184.474	13.1328
99.0976	5.4528
109.03	7.5776
75.1872	4.8896
46.9248	2.9696
189.133	22.5024
218.88	25.216
3.6608	0
101.786	8.0128
188.006	13.3376
70.2464	1.4336
75.52	3.7376
7.2448	1.0752
233.677	16.768
117.786	10.8032
251.776	7.6288
76.3648	5.6832
4.4032	0
101.76	7.9616
125.082	12.8
97.8944	8.192
42.4704	2.5088
68.224	1.9456
231.245	22.1184
115.328	5.12
466.304	55.936
107.264	9.4208
111.898	7.2448
95.36	4.2496
181.094	9.5488
284.57	29.5168
184.397	16.8448
71.296	5.2992
102.605	9.0112
74.496	3.6608
148.352	14.0288
64.2304	3.2256
102.477	8.9088
154.445	15.9744
80.5888	4.6336
95.5392	3.3024
109.235	9.8816
78.3104	6.8352
58.4704	3.9424
116.07	10.5216
95.5136	8.1408
99.7888	4.9408
93.2352	3.5328
121.958	4.7104
41.2416	2.0224
90.24	4.5824
93.0048	9.856
1881.52	145.946
118.246	9.4464
114.534	14.4128
199.706	16.4352
124.851	9.344
74.24	8.4736
76.3392	3.4048
144.23	5.6064
2.7648	0
131.994	9.9584
8861.11	477.542
190.08	21.7088
1085.06	85.9136
148.608	9.0624
92.6464	6.7584
91.7504	5.0176
444.416	38.6304
75.6736	4.096
3.3536	0
49.8176	2.2784
58.8544	2.2016
110.003	6.8096
128.947	13.1328
120.602	10.1632
98.816	5.504
46.208	1.0752
74.4704	6.2464
2.944	0
6.272	0
413.85	26.7776
53.2992	3.4816
149.862	12.8768
102.451	5.0688
2.7392	0
67.5072	4.4544
83.5072	3.8912
79.3344	6.528
81.5616	4.5824
79.1296	5.9648
4.608	0
40.3968	4.3264
69.1712	6.1952
99.456	5.9904
128.384	5.4784
3.0976	0
187.955	19.5072
77.1584	6.272
97.7664	7.68
2.944	0
17.536	0
93.4912	4.3008
201.216	14.6944
83.6608	5.2224
84.1472	6.2976
100.352	4.6336
8.3968	1.152
4.7616	0
4.2496	0
1412.3	147.174
70.2464	4.096
286.899	18.6112
159.872	11.2128
15.5136	4.6848
182.784	17.2544
102.093	8.6016
269.67	42.496
79.3856	4.5312
35.6608	1.5104
3.0976	0
82.3808	2.8928
85.9904	5.632
3.6096	0
106.47	11.2128
147.635	6.7072
155.315	13.568
53.7856	6.1952
135.91	6.6304
9.8304	3.456
115.149	7.6032
110.515	9.472
43.1104	3.8656
79.872	5.7856
2856.86	348.39
166.528	16.1536
252.723	15.4368
49.2032	5.2224
66.4064	6.016
76.0576	3.9168
142.208	12.7488
58.2656	4.2496
349.722	18.0992
71.2448	4.4288
95.8208	8.32
72.2944	5.4528
602.138	91.392
55.424	0.6656
131.814	10.8288
149.094	13.3376
710.81	44.4416
144.64	11.008
52.0192	1.792
39.7568	0.2816
111.949	8.2176
51.7888	3.072
15.0528	1.5104
66.4832	2.56
252.979	23.8592
4.352	0
56.6784	2.5088
64.9472	3.968
58.6496	6.016
47.9744	3.4048
71.3984	3.6608
107.443	6.8864
134.784	6.656
60.8	2.9184
252.979	15.0272
104.013	9.4464
81.1776	1.9456
320.666	32.4608
88.6528	5.4528
71.9616	5.0176
54.5792	2.6624
73.4208	4.5824
65.9712	3.5072
163.251	10.7776
82.56	3.8912
58.496	2.2784
84.6336	4.8384
100.992	8.3712
101.274	6.7328
53.9136	5.0176
74.9312	6.0672
85.9648	5.9392
107.315	4.096
286.643	22.784
314.547	22.8608
232.602	15.2064
65.7152	3.3536
122.624	9.2672
230.784	18.5088
128.282	13.312
81.7408	3.84
175.283	11.4176
79.2832	3.456
64.256	1.5872
153.114	6.528
207.053	21.632
183.885	14.6432
155.725	7.2192
290.381	21.2736
69.248	2.4576
108.749	6.5536
62.72	3.6864
109.824	7.296
232.934	10.8032
47.4368	2.1248
89.5232	6.4
2871.78	179.43
85.2992	5.5808
126.336	7.1168
82.56	3.6352
111.206	5.3248
36.0704	2.2272
408.627	24.96
49.7152	2.3808
64.1024	3.968
188.032	4.8128
291.43	26.2144
141.542	9.088
3.4816	0
78.208	8.6016
45.0048	1.8944
67.5072	5.4016
122.65	6.3488
214.477	15.9232
75.6992	5.4272
95.36	3.3024
45.1584	1.408
102.63	5.6576
71.7056	3.1744
228.326	24.6784
186.061	21.248
55.552	1.664
65.28	3.3792
106.931	4.9408
95.616	5.8624
11.5712	2.0992
47.36	1.3824
109.926	5.2992
75.5712	4.736
359.68	22.912
87.7056	5.4016
107.52	6.7072
139.776	7.2704
60.7488	6.3232
159.693	9.856
54.016	2.4064
172.442	14.2848
69.9648	1.1776
142.541	7.7568
137.498	11.1616
57.1392	4.9664
46.6176	1.4848
76.4416	3.4816
118.784	7.6544
75.904	5.5808
59.9296	1.6896
86.6048	1.8688
99.2512	3.584
63.744	3.4816
69.0688	1.4592
114.227	5.8368
66.4064	3.2
72.8576	5.504
259.456	20.608
114.432	7.6288
50.0736	3.328
57.1136	3.0208
67.2768	3.6608
37.8368	3.1232
85.5552	1.8176
122.317	11.7248
2.9184	0
76.3392	1.92
117.99	4.5312
65.792	2.5344
70.144	0.64
187.75	13.056
8.8064	0
51.9424	3.9168
65.8944	2.6624
84.9152	5.4528
90.24	6.3232
79.3856	3.2256
98.4576	7.9616
101.811	7.1424
12.2624	1.2544
148.173	10.9312
62.8736	3.5584
109.056	8.5248
99.7888	6.7584
208.614	25.4976
70.784	3.2512
83.4048	3.6608
77.568	3.8656
3.7888	0.0256
101.786	5.2736
234.675	22.8096
379.008	14.7968
85.0432	6.784
248.32	15.5392
104.371	5.3248
98.6624	6.1952
2.9952	0.128
67.9424	5.376
34.3808	4.0448
71.0144	4.4544
155.827	10.2656
54.5024	5.6576
4.0704	0
166.451	5.2224
44.1088	1.7664
123.392	7.2448
96.2816	7.0656
171.597	8.576
120.806	8.0128
362.035	26.3936
70.4	5.3248
76.5184	2.7392
80.64	3.968
124.134	7.296
98.2272	6.8864
44.5696	1.7664
118.835	6.912
34.56	1.408
179.712	10.4704
83.456	4.6592
69.2992	4.224
75.7248	4.2752
129.741	7.808
166.118	17.024
117.939	5.0176
279.04	21.9648
96.256	7.1424
146.278	9.8816
12.9024	3.8144
651.443	53.8368
198.477	20.992
110.746	5.8624
13.9008	1.5872
165.786	11.8016
102.323	5.6832
71.3984	4.6848
98.688	5.9392
160.179	16.9728
68.7616	4.8896
86.784	3.9936
82.6112	5.8368
18.8672	1.3568
63.488	4.48
79.616	7.4496
77.824	3.5328
132.915	7.68
196.378	16.7424
66.944	4.3776
64.256	5.7856
174.336	10.4448
497.92	30.1056
26.7008	0.256
102.067	1.9712
93.6704	10.112
226.842	18.5856
41.4464	1.9456
73.3952	5.6576
111.437	7.552
200.858	18.56
90.4192	6.6304
60.6464	2.304
96.3584	7.4496
131.635	12.16
77.0304	6.7072
102.579	6.528
98.6112	4.608
85.2992	2.7136
103.066	6.7072
86.8608	2.6112
85.504	4.6848
54.5024	0.8704
77.0304	4.9664
52.7104	3.072
46.5408	1.3312
142.413	7.8336
40.8576	3.2256
69.5552	4.8384
129.664	5.8624
116.864	10.4448
130.099	11.6736
52.8128	2.2016
318.08	32.6656
108.928	3.6352
153.933	16.7424
130.048	10.0608
90.4448	5.248
81.3568	6.3488
185.958	14.336
106.291	4.2752
107.622	6.6304
127.795	13.8752
842.496	35.9936
2.6368	0
130.227	7.8336
38.4768	1.8688
70.1696	2.56
93.568	5.2224
72.0384	4.2752
132.531	9.1392
64.9216	2.7136
135.194	10.1888
39.936	2.0992
10.4704	2.2272
132.173	8.5504
220.851	15.104
129.766	5.9136
100.787	8.4736
11.52	2.1504
3041.33	186.112
144.435	11.4432
56.7296	1.7664
113.28	10.9568
172.083	7.2192
82.9952	5.7344
184.55	13.44
93.8496	5.5552
138.982	7.2448
222.515	22.8352
72.9856	4.4288
91.8272	3.5072
176.256	9.856
76.4416	3.7632
123.443	8.1152
110.362	9.2672
127.923	10.1888
174.976	11.6224
71.7056	3.8144
83.2256	6.5024
66.4576	10.3424
74.9056	4.8128
198.656	13.44
119.04	7.7568
155.085	8.7296
46.592	3.5328
57.6768	2.9184
80.2816	2.5344
12.7488	0
64.7424	5.6576
57.4208	2.432
158.438	11.776
63.7184	4.5568
3.456	0
97.2288	6.7072
91.5712	10.4448
142.874	8.0896
82.1248	4.5824
83.8144	6.4
326.118	33.4848
54.1952	5.7856
99.5584	3.456
86.912	6.4
4.3776	0
104.064	8.8064
41.6256	1.7408
265.472	26.1376
91.136	5.5296
95.8464	8.7552
255.002	15.9744
52.0192	2.2272
153.242	15.9232
66.8416	5.7344
196.454	16.7936
171.827	12.0832
68.3008	5.1968
111.821	7.7824
199.014	14.6688
3.9168	0
127.386	7.0144
140.902	3.2
165.171	14.08
95.8208	10.5472
372.608	21.8368
136.013	6.5792
3.328	0
466.253	49.536
3.0464	0
254.157	16.9472
8.8064	3.7632
5.4528	0
81.8432	5.8368
5.76	0
132.429	7.808
63.2576	4.48
82.8672	3.8912
99.8656	5.2224
121.933	6.912
99.84	7.424
346.445	32.4608
139.213	15.5904
101.069	9.1392
10.1632	0
4.4032	0
54.1696	7.0656
259.072	23.7568
73.9072	2.8928
82.56	5.4784
121.907	11.52
84.7872	5.0944
115.2	5.2736
412.339	37.3248
559.667	40.1408
185.472	13.0304
67.7888	4.2496
128.256	7.9872
60.2368	5.248
10.5216	0
56.1152	3.0464
150.707	11.6736
76.5696	5.0944
85.248	4.5568
148.147	9.728
75.2128	7.2704
126.413	7.6032
279.117	23.5776
143.002	13.3888
100.045	8.8832
97.92	4.736
38.528	1.5872
112.102	8.1408
107.827	13.0048
483.277	50.048
107.597	7.4752
5.3504	0
78.6432	4.1216
12.0576	1.3312
127.872	9.0624
82.2016	4.0704
67.2	4.2496
138.214	11.5968
56.8576	4.8384
4.8128	0
3.2	0
4.3264	0
132.275	11.8272
94.0288	6.016
400.666	23.6544
148.813	12.2368
122.854	7.3216
63.232	4.7872
4.224	0
69.7856	4.864
194.33	17.7408
91.136	10.2144
65.5616	5.6576
41.6512	2.1248
4.224	0
70.272	4.2752
4.3008	0
349.184	14.1312
33.0752	2.7904
59.0336	2.2528
78.1312	6.2208
193.741	14.464
98.9952	8.1152
101.478	5.0944
124.442	6.4256
81.4336	4.9408
207.309	15.6672
102.272	4.992
89.344	3.9936
109.491	8.3712
197.606	12.0064
80.4608	4.5056
46.6688	1.6896
95.9744	8.6784
5.9648	0
706.637	64.4096
335.77	27.4176
66.0736	9.4208
54.6816	3.072
68.9152	2.56
88.1152	7.3216
59.4944	4.6592
168.781	11.2128
73.3952	4.4288
64.6656	3.9936
64.512	5.5296
110.259	8.2688
96.7168	4.7616
85.504	4.3008
112.768	9.2928
121.779	11.0336
763.136	79.3344
76.1856	4.7616
64.5376	3.5072
2.8672	0
395.853	51.3792
137.779	11.904
126.234	9.1904
32.64	2.3808
433.664	46.976
143.002	10.1888
7.0656	0
60.8768	2.6624
134.195	6.3232
97.92	4.8384
79.5392	4.6336
327.552	38.9888
7.2448	0
84.5568	4.7616
126.848	8.3456
75.776	3.2512
12613	835.891
126.925	16.4352
162.586	14.592
963.405	72.5248
86.2976	6.9888
51.6608	2.5088
47.36	1.2544
149.811	10.2656
92.1088	5.504
4.6592	0
276.07	19.712
95.4368	10.5728
133.402	9.6512
170.701	11.4432
167.142	10.6752
82.4832	3.7632
95.7184	6.5792
10.4448	0
137.421	13.6704
74.624	4.7104
61.8496	6.2464
145.28	7.1936
74.8288	4.3264
101.632	6.912
84.5056	6.2208
78.08	1.408
156.262	11.648
113.587	8.3968
62.6944	6.6304
122.24	8.1664
299.827	29.5168
4.6848	0
121.498	6.2976
8.576	0
59.2384	2.5856
101.299	4.9408
107.29	5.0432
183.347	23.5008
69.2736	4.4544
72.7808	4.2496
110.694	5.76
49.024	5.6832
84.736	6.4
92.1344	7.1936
97.5104	6.0928
86.9632	3.9424
63.8464	2.8416
110.08	5.0176
130.509	12.8256
121.37	12.672
164.454	14.2336
81.5616	6.6048
151.501	9.9072
70.8608	1.664
167.014	13.4912
71.5008	4.6336
4.608	0
107.827	9.7792
142.694	19.4304
57.4976	4.3008
161.69	14.336
3.9936	0
89.856	6.784
89.4208	5.0688
158.694	16.896
153.626	14.848
63.9744	5.0688
3.1232	0
46.3872	2.7136
5.1712	0
46.4384	1.3824
102.144	7.9616
68.5824	5.8368
28.0064	3.712
84.1472	4.5056
87.6032	7.6288
100.864	4.7104
106.061	5.6064
206.541	26.4192
95.744	8.6272
75.2384	5.7856
42.88	1.5616
208.026	15.872
139.366	9.5744
81.4848	4.4288
73.0368	4.48
85.4528	5.3248
57.728	4.6848
95.5904	8.6528
3.072	0
67.8912	4.1472
107.904	8.5248
98.5856	8.0128
76.7232	5.12
65.7408	6.9376
88.6016	7.0912
203.75	13.8496
127.181	9.3696
82.6624	4.8128
44.6464	1.7408
47.9488	1.3312
31.8976	3.0976
70.8352	5.5808
83.6608	8.4224
64.5376	4.7872
75.904	5.5296
76.0576	3.6352
79.5392	3.8656
406.246	47.8208
105.446	5.0432
80.6144	1.5872
197.12	18.9952
220.621	22.016
127.872	12.4672
88.4992	6.6048
321.331	30.3616
3.7376	0.6912
4.48	0
103.706	6.4768
107.136	7.552
56.96	4.0192
67.2512	5.9648
107.674	8.2176
9.216	0.9472
446.285	38.7584
51.712	2.4576
78.08	5.9648
113.51	2.0224
67.1744	5.6064
161.946	9.4208
79.104	7.0912
76.928	4.1728
84.9152	8.3456
88.0128	5.9392
341.299	25.9328
65.8688	3.9168
69.632	4.0448
73.8304	3.2
116.019	7.5008
247.142	21.0432
84.9664	5.4016
109.85	7.7568
118.426	6.5536
5.4272	0
10.0352	0
81.4336	5.9904
5.9904	0
214.758	14.8992
178.202	15.7184
143.437	10.0864
71.2448	4.4288
96.6656	5.0432
3.0976	0
118.195	8.4224
183.04	12.928
61.2352	2.8672
71.0912	4.1728
111.667	9.728
110.259	8.4992
62.6688	2.8416
93.9776	5.8368
88.6528	4.3008
122.214	11.8528
71.3984	6.0672
13.184	2.4064
117.555	5.376
70.6816	2.8672
102.554	10.5216
96.6144	6.7328
112.307	6.9632
100.403	5.4272
119.424	11.6736
8.6016	1.536
123.776	8.7552
122.24	5.7088
44.8256	2.6624
84.2752	3.8144
70.528	3.1232
39.6032	5.6064
75.4432	5.2224
310.886	19.7376
2.8928	1.408
61.6192	5.7088
129.587	7.6544
85.0176	4.4288
928.973	72.1664
99.5584	1.2032
106.01	5.2736
188.109	12.7744
462.797	39.04
130.739	5.632
124.006	6.0416
81.8176	4.6848
63.0784	3.328
112.563	6.9632
94.6944	6.272
3.84	0
459.827	25.0624
82.9952	8.7808
84.224	4.5312
94.72	3.8144
11.904	1.28
86.2464	4.3264
241.28	24.96
118.835	10.0864
8.6272	0
2136.91	91.2128
179.661	5.2992
76.4672	4.5824
107.494	7.7824
56.704	2.4576
80.1024	5.8112
92.2624	7.552
74.6496	4.5824
211.686	14.2336
224.307	15.1296
96.512	1.408
164.454	10.5472
98.4576	5.6064
61.7728	3.8912
98.176	8.5504
94.5152	12.9024
194.381	22.9632
135.706	7.0912
135.501	7.424
121.626	4.0704
461.44	24.832
95.5136	9.5232
692.557	41.088
118.938	10.3168
1218.43	95.8464
76.3392	3.1744
68.2752	3.712
72.9344	3.5584
233.242	10.5984
71.0912	3.584
79.1552	4.5056
17.3568	1.664
4.2496	0
191.002	10.7264
217.139	14.5664
23.0144	4.7616
171.443	14.6176
63.3856	2.5088
65.7664	2.7904
68.3264	3.6608
93.4912	5.12
160.998	7.3472
58.752	0
96.64	12.9792
90.9312	2.5856
92.928	5.4528
200.653	13.8752
51.9168	1.4848
135.782	10.0096
262.81	13.7728
123.29	6.6816
89.0624	4.7616
94.7968	6.144
55.936	2.5856
143.872	16.9728
379.802	22.4512
77.2864	2.9696
243.251	30.2336
305.536	25.6768
177.51	11.392
71.8336	5.76
78.8992	6.4256
43.3408	2.0736
47.4368	3.8912
147.635	8.8832
110.541	11.2384
187.11	19.3792
34.2528	1.6896
134.938	11.6992
10.112	0.6144
84.096	4.5312
79.6928	6.6048
60.7488	4.1728
99.0976	7.1424
10.9312	0.9728
106.906	3.2512
163.584	13.056
303.642	20.1984
75.9296	4.7104
66.0736	3.6864
65.0496	3.2256
154.854	13.9264
127.002	10.2912
113.664	6.5024
87.7056	3.3536
64.8192	2.944
255.181	14.6688
460.39	27.8272
103.731	3.4048
80.768	3.6608
227.942	10.0352
482.099	34.0736
175.539	4.3776
74.5728	4.2496
53.0944	6.4768
48.512	1.408
52.5824	1.1776
106.496	8.0384
10.4448	1.2288
204.16	17.9456
151.808	9.216
83.328	5.2224
132.096	7.1168
46.72	1.8944
127.59	8.3456
78.9248	3.7888
87.1936	5.76
66.9696	1.8432
91.5456	5.9648
80.4864	5.1968
71.0912	4.8128
212.25	11.9296
178.509	15.8208
111.283	10.0352
78.464	4.5568
40.6016	2.1248
78.2592	3.0208
80	6.6048
96.3584	4.992
92.672	6.3488
59.648	2.8416
97.5872	6.3488
263.859	19.3024
75.9808	3.7888
123.443	12.5184
110.285	6.784
103.373	8.6528
238.285	22.4
157.491	15.5648
3.8656	0
45.9008	3.8656
126.182	6.2976
126.157	4.6336
187.238	14.1312
96.6656	5.3248
93.7216	5.2992
124.646	7.6544
60.288	3.5584
108.774	6.4256
26.6752	3.8912
159.232	8.448
3.4816	0
167.962	14.4896
77.4656	3.9424
51.328	7.2448
63.0272	3.2
168.064	11.2384
220.979	13.2864
222.515	12.0064
113.715	5.2736
155.264	13.7728
45.184	4.8128
71.3728	1.7152
70.1696	2.6368
239.744	20.0192
67.328	3.8656
411.034	16.8704
81.6384	7.3984
117.402	5.6064
130.406	5.9648
115.251	13.7216
58.112	2.304
76.4928	4.1728
77.5168	4.736
100.429	8.0128
86.3488	5.632
102.605	9.472
151.245	15.872
225.434	16.4608
145.715	13.44
335.002	24.8832
739.507	67.6352
87.0656	3.8912
96.8704	5.1712
146.739	9.1904
127.232	6.6048
118.605	7.3216
212.147	10.4448
101.99	8.448
78.336	1.408
84.6336	6.0672
341.043	40.8064
73.984	5.3504
123.11	5.376
165.504	9.9328
43.9808	2.5088
83.5072	6.2976
249.395	23.7568
62.3616	2.4576
124.57	10.2144
137.728	9.6256
57.2672	3.456
90.8032	5.4528
51.968	1.9456
92.4928	5.0944
28.2624	1.9712
135.706	10.2656
170.675	14.0544
112.026	8.2688
3768.24	358.272
81.3312	2.5088
191.334	10.624
133.786	10.1888
79.9744	3.968
98.3296	3.9168
208.205	16.3584
14.0288	0.9984
63.872	2.5856
110.464	8.2432
107.571	6.9632
96.256	5.632
8.4736	1.792
116.147	8.4736
52.9152	1.7664
61.6448	2.7392
89.1136	6.3488
126.669	9.6256
278.272	19.6096
50.3808	4.2752
3.7888	0
79.6672	4.0704
140.954	9.3952
101.76	5.248
345.011	39.6032
121.651	8.9856
121.114	10.1888
132.992	9.9072
205.21	18.7648
3.2512	0
106.445	9.088
344.32	34.1504
75.6736	3.328
66.8928	4.1728
678.118	79.9744
77.4912	4.8128
5.4784	0
319.642	29.9776
100.71	6.3744
137.242	11.3408
102.554	3.456
62.6432	3.2512
86.7328	4.992
108.518	6.1952
100.838	11.0848
115.072	5.3248
72.9344	2.8416
36.6592	1.8176
87.168	3.7888
127.898	6.528
139.546	11.008
62.2336	3.0208
223.386	19.3536
246.938	41.856
189.517	12.3648
301.03	19.0976
99.2512	9.8048
192.589	17.7152
105.088	8.832
113.434	10.1632
54.3488	1.4336
89.1136	4.9664
174.234	10.4704
78.3104	3.84
94.2336	6.4512
134.938	6.6048
171.264	22.3744
111.514	8.3968
257.664	28.6208
252.621	25.2416
177.971	15.2576
133.222	13.312
25.216	4.3008
168.218	12.3648
86.0672	7.7056
140.851	4.9408
106.189	9.1136
154.496	17.3056
77.8496	1.2032
66.6624	5.5296
106.368	5.2736
100.813	6.4256
109.286	14.7712
85.4272	7.4496
15.1296	3.3536
555.085	58.7776
50.9952	3.4048
100.352	5.4528
76.3136	5.6832
59.0592	3.7632
52.1984	2.6112
7.8592	1.8944
94.6688	5.888
348.032	37.8624
97.2288	5.6832
14.5664	1.8432
58.7008	1.408
120.422	9.9328
69.6064	4.9664
54.528	2.6112
934.349	59.2384
116.941	6.3744
104.243	7.1936
105.267	11.648
118.528	11.8272
141.517	8.2944
63.0528	3.5072
74.752	7.5008
144.742	15.5136
160.128	5.7344
4.9152	0
109.44	7.0656
140.723	10.7008
100.198	6.784
92.0576	8.1152
120.73	6.6816
13.056	1.9968
179.174	12.544
205.107	19.4816
111.411	10.1632
248.166	17.1264
29.0048	2.1248
117.581	9.0368
281.19	18.944
36.5056	1.4848
180.301	31.0528
110.95	4.8384
1746	129.382
82.2528	6.1696
50.816	0
53.0944	2.0736
170.112	9.4464
67.328	2.8416
188.544	9.8048
86.0672	2.7648
104.73	7.7312
146.099	6.0672
124.723	4.9152
5.7344	0.9216
48.9472	2.8928
117.837	7.1936
326.758	20.224
112.256	5.5296
445.645	49.8944
73.1136	5.6576
141.286	9.1648
79.2832	8.6528
198.579	18.304
89.5744	6.7072
222.387	16.6912
267.264	17.0752
129.869	9.7792
266.368	16.384
239.667	21.0944
63.4112	3.7632
91.4688	10.2912
73.728	4.8128
307.866	27.4432
88.9344	5.4016
102.4	8.192
107.93	9.2928
129.869	4.736
158.08	13.056
79.1808	10.4704
74.6752	4.0448
3.328	0
188.237	16.1024
180.301	12.672
9.1904	0
123.034	9.984
152.397	12.416
61.7984	1.664
56.448	2.2528
107.034	8.5248
42.3424	2.7904
310.912	20.352
181.939	10.496
500.941	66.1504
79.5392	6.272
123.904	8.2944
78.1312	2.2528
1828.45	209.664
67.3024	7.168
205.824	19.2512
50.5856	2.3552
21.4784	0.9216
104.166	4.352
168.986	5.4528
129.024	7.8592
140.083	10.1888
91.4688	7.4496
147.584	10.9824
232.243	14.6432
82.2528	4.224
103.322	9.344
58.0096	7.1424
4.0192	0
13.5936	0
138.163	12.7488
76.4672	2.4064
28.2624	4.2752
88.5504	6.4512
109.491	12.4928
92.1088	8.7808
86.6304	4.4032
164.096	12.5696
88.32	5.9136
27.2384	2.2272
300.134	28.0064
74.5216	5.504
312.806	22.656
50.5344	2.304
121.549	5.6064
158.746	9.1904
59.2896	6.9632
170.394	19.0464
68.4288	7.1424
73.1904	3.3536
90.0352	7.1424
83.328	4.352
3.3024	0
107.034	10.112
90.3168	7.6288
59.3664	2.56
71.68	4.4288
62.4128	4.736
16.9728	3.1744
344.602	35.5584
844.646	97.6896
6.4512	0
239.718	23.3216
102.81	5.9392
67.7632	4.1472
82.56	6.9888
362.01	35.5328
115.302	9.216
58.0352	4.4544
52.096	2.432
173.952	12.3904
1717.2	154.342
96.0768	4.7616
126.106	7.68
55.168	4.2496
189.926	12.0832
191.078	8.7296
2031.31	166.989
94.336	6.8352
3.3024	0
59.3408	2.304
132.557	10.112
85.1968	4.5312
302.899	25.216
95.6416	5.4528
66.2016	3.7376
86.912	4.992
96.8704	8.5248
78.5664	5.9904
78.5152	6.144
100.326	7.5776
65.408	5.7088
215.808	34.7136
55.808	2.4832
94.5152	6.8864
73.088	4.6592
67.1488	5.9136
147.123	13.1328
165.453	9.1392
100.685	10.9056
32.4864	6.016
129.792	9.8304
345.139	25.1136
6.3232	0
81.0496	5.888
81.8176	5.888
190.131	12.3648
136.781	6.7328
61.3888	1.8944
82.2272	6.9376
130.432	8.0128
78.3104	5.0432
302.234	25.0624
290.739	21.2992
123.827	7.296
28.2368	3.2
103.014	7.1424
105.933	5.5808
480.922	42.3424
6.8352	1.92
107.29	6.016
69.3504	3.8656
252.16	27.6224
80.128	5.9392
10.0096	1.7664
54.6816	3.0464
130.202	11.904
131.738	12.416
65.6896	3.2256
83.712	7.0144
167.501	14.5408
96.384	3.5328
70.0928	2.7648
50.304	2.5344
219.136	25.344
52.2496	7.3472
99.6352	9.8048
73.344	3.7888
7.6544	0
93.4912	6.9376
52.7616	3.5072
157.03	12.3904
66.8416	5.1712
124.083	8.704
63.488	3.4048
98.5856	8.0128
112.256	11.0336
180.582	14.464
190.208	14.1568
4.8384	0
62.9504	3.1744
84.8384	9.5232
52.4032	3.0208
90.0096	4.0192
68.8128	4.1216
99.3024	11.392
123.597	12.2112
226.022	21.9136
100.07	7.1168
130.33	9.728
115.123	8.7552
109.798	8.064
119.219	10.9056
66.9696	3.712
76.1088	3.7376
80.768	9.2928
101.478	4.48
45.44	2.6368
145.408	14.0032
65.5872	3.3536
268.877	18.5856
201.702	16.64
34.816	1.4592
14.208	1.9968
110.208	2.7904
132.787	14.3616
76.8	4.864
64.1536	2.6624
180.07	5.632
114.739	7.936
163.2	3.2256
192.461	13.7472
92.1344	9.2672
180.122	19.1744
104.474	6.0928
126.387	7.7824
200.397	12.5696
162.688	12.2624
66.56	2.2272
120.499	11.7248
98.6624	9.088
49.0752	3.9168
62.976	4.5312
101.939	5.2992
106.035	5.5808
135.885	14.3872
172.954	17.9456
116.89	11.52
76.3904	8.6784
162.278	14.1824
3.584	0
71.808	3.3024
77.0304	0.5376
72.2432	5.76
103.603	3.7376
349.005	37.0944
152.883	10.1632
106.061	9.1136
221.338	24.0128
93.2864	6.0416
307.866	31.7184
131.558	7.6288
210.432	19.3792
141.696	11.6736
138.47	8.9344
92.544	5.8624
211.456	20.5824
105.779	9.216
64.6912	3.5328
66.3296	7.0656
324.813	37.0176
218.061	13.952
327.603	30.464
70.4	3.9168
3.1232	0
4.5568	0
113.382	6.3488
188.979	16.4352
102.758	9.6
121.574	7.04
76.3392	5.4528
161.459	17.3824
39.296	3.2512
202.547	28.3648
65.152	8.1408
140.134	11.136
288.896	24.7808
137.344	17.152
109.389	7.3216
113.126	13.0816
82.2016	6.4256
116.352	8.6016
142.643	7.936
257.664	25.3184
142.976	11.9808
57.2672	3.8144
196.89	23.0912
110.31	8.1408
99.1744	12.9536
244.378	17.6896
7.9616	2.2528
127.104	6.656
82.8928	3.584
79.3856	4.8128
175.744	8.4992
89.7024	1.8432
224.973	23.424
290.33	24.192
73.3952	4.4288
104.243	1.92
57.472	2.688
58.0608	7.552
95.36	5.2992
73.1136	4.608
148.557	12.0832
174.618	20.2496
82.6624	7.7312
35.9936	0.768
76.8768	3.9168
117.018	11.648
18.4576	0.896
1344.79	96
121.498	4.1216
126.899	10.2144
236.416	20.9664
133.274	8.3712
92.8256	5.0688
99.2256	6.1952
111.002	13.4912
125.21	9.8816
81.3568	5.5808
120.806	13.2608
5.12	0
204.16	16.64
133.171	6.5536
88.7808	7.6288
103.731	8.9088
258.842	21.7344
172.928	17.1776
95.104	6.5536
99.4304	7.2704
136.422	12.3136
106.547	4.9664
85.7856	6.6048
376.627	30.6688
177.306	7.1936
47.1552	2.5344
280.602	26.9312
286.413	34.0224
139.75	8.2432
81.536	5.6576
2.7392	0
145.894	10.0352
67.0976	2.048
89.3952	1.3568
84.1472	5.0432
106.675	5.9648
81.2032	5.1712
109.107	0.2304
80.256	4.0192
18.2272	1.792
232.755	21.8624
88.2432	4.9408
7.6032	0.8448
57.088	3.3536
337.126	33.2288
164.608	13.8496
218.803	24.3456
140.928	10.3936
72.1152	4.0704
81.3568	4.9152
108.621	7.5776
133.248	13.6704
72.2688	4.5312
152.602	12.544
102.298	7.1168
90.3424	7.1936
66.5856	6.4
100.429	7.9872
117.018	13.952
98.7904	9.5488
155.955	8.8064
746.342	40.7552
79.104	6.7584
229.837	22.5792
225.766	19.1232
92.1088	10.0864
89.6512	0.3584
163.098	22.3488
100.966	7.7824
50.816	2.6112
66.8672	4.5568
7.6288	0
66.9952	2.5344
22.5024	0
48.9472	3.456
226.97	19.4048
29.5936	2.0224
59.8272	3.712
79.5392	6.7584
73.6512	6.144
533.376	47.5136
124.672	9.7536
101.299	7.1936
125.184	11.3408
85.4784	3.8912
58.5984	2.304
1384.78	106.522
117.965	7.168
137.267	6.4768
121.754	7.6032
68.992	2.9184
329.011	18.432
150.989	12.3392
119.296	8.5504
137.114	7.9104
101.069	8.0128
86.8096	6.016
347.904	23.9104
233.344	25.9072
179.738	9.6512
77.9008	6.0672
63.8464	18.6368
3.3024	0.1024
249.6	21.9648
95.2064	4.5312
189.926	16.8448
94.1568	6.0416
314.112	24.4992
166.81	10.112
[truncated: 20,761 more rows]

## Sheet: Fig 2D raw p fluorescens
droplet_area	cell_area
8.3968	0
2.7648	0
9.1648	0.0768
60.4416	13.312
25.3952	0.896
6.272	0
21.504	0
129.229	16.9984
23.1168	2.3808
23.8336	5.5552
7.3472	0.0256
47.7696	6.0672
18.0992	1.28
4.6592	0
17.92	3.2256
7.9616	0
617.293	53.1712
15.7696	1.28
595.84	116.301
33.2544	2.2272
30.208	7.8592
60.1344	8.0384
53.6576	9.984
6.144	0
15.7696	0
7.5776	0
69.0432	16.2304
33.8176	6.3232
521.907	35.328
3.5584	0
19.3536	0
64.256	16.384
64.3072	7.3984
95.2064	12.2624
7.9104	0
3.6864	0
27.7248	0
9.5232	0
13.5424	0
104.013	12.4928
6.912	0
28.2624	5.6064
39.0144	2.8928
34.0224	5.6832
6.9376	0
32.0256	1.792
21.4528	4.5824
33.7664	6.6816
39.7312	0
79.616	9.216
108.083	18.176
26.5216	0
5.1968	0
39.4496	2.048
22.528	0
14.592	0
32.8448	5.2736
31.2576	0
9.9072	0
25.088	0
27.4176	3.712
6.6304	0
3.4304	0
25.7792	4.2496
3.712	0
86.656	15.2576
53.9904	15.0272
27.4176	1.92
56.7296	2.9696
13.44	0
33.152	5.2224
33.9712	3.9168
5.632	0
15.1808	0
40.8064	4.992
4.7872	0
33.152	5.0176
8.2432	0
33.7152	7.296
103.398	13.9776
6.3232	0
24.704	0
41.2672	5.6064
91.7504	12.6208
3.5584	0
75.8784	13.4656
158.976	27.8784
51.968	3.0208
37.7856	2.56
45.4656	3.1232
50.176	8.576
45.5424	6.6304
50.56	7.9872
34.2528	4.864
38.1952	7.68
29.696	0
38.4512	5.9392
913.408	13.184
11.1104	0
6.8608	0
50.8672	0
9.728	0
35.3024	2.2784
65.3056	12.3648
11.52	0
44.6208	5.504
4.992	0
8.3456	0
31.8464	5.1712
57.2928	9.3952
32.4352	5.1456
2.9952	0
69.7088	13.7216
65.3056	5.3504
34.7648	3.7632
58.9568	9.1392
45.1328	6.4768
7.6032	0
31.1808	2.7392
31.7952	2.7904
32.64	2.6624
34.8672	2.5088
32.5888	6.6304
35.2512	0
38.4256	5.8112
7.8592	0
36.9408	3.2256
3.072	0
53.376	10.7776
27.4176	2.6624
5.4016	0
30.9504	4.6848
48.3072	7.7056
31.2576	6.272
31.6928	5.1968
77.9264	11.4688
4.224	0
4.7104	0
99.5584	26.7008
37.8624	7.9616
193.024	41.6768
28.8256	3.6352
43.7248	7.808
4.3008	0
49.0752	8.4224
59.4688	1.1776
81.4592	17.152
15.9488	0
30.4896	4.9408
41.7536	4.608
36.992	2.2016
28.9536	3.6864
1646.08	417.382
41.3184	2.7392
42.5472	7.424
77.7472	20.1984
323.507	86.7584
81.4336	1.8944
16.9472	0
29.2864	5.6832
37.4784	5.6832
35.5584	3.1232
51.9936	13.4912
38.5536	5.8368
46.8736	2.0224
8.8064	0
44.4416	9.4464
5.4784	0
34.176	2.2016
34.0224	5.9904
2.6624	0
31.7952	0
105.037	6.5024
54.9376	8.0128
39.1168	5.7088
54.3488	11.5456
12.1856	0
19.2512	0
38.272	3.3792
8.0384	0
64.6144	9.1904
32.0256	2.6368
161.536	36.1984
40.7808	8.7296
7.7056	0
1395.4	212.941
3.0208	0
39.3728	5.888
16.5632	0
75.9296	19.1488
37.888	5.7088
102.4	18.9952
13.7472	0
41.6256	6.6048
59.3664	13.9264
5.6576	0
104.525	1.2288
3.6352	0
40.9088	2.8416
43.264	5.8624
25.9584	0
70.1184	13.7216
36.0448	6.3488
37.7344	5.2736
71.2192	10.7008
70.2208	12.8512
55.5008	10.4448
23.5264	0
6.4768	0
4.3008	0
7.2448	0
6.144	0
5.4528	0
3.9424	0
47.488	9.4464
18.3552	0
74.8544	13.5424
98.3808	28.0832
7.4752	0
39.936	5.5552
36.352	7.5776
26.3168	9.3184
7.9872	0
49.6896	9.0112
23.5264	0
44.3904	6.4768
29.952	5.4016
3.6864	0
73.984	8.6528
2.7904	0
637.133	92.6464
35.9424	2.3552
1378.56	237.978
4.9408	0
45.824	11.0848
3.8912	0
12.1856	0
4.1984	0
36.8896	2.4064
6.7072	0
8.5504	0
6.4	0
35.9168	2.3296
5.5808	0
24.8832	0
97.536	0
38.2976	6.4512
28.9792	0
30.5664	5.6832
2.9696	0
29.0816	2.8672
31.4624	4.8128
7.936	0
5.2992	0
26.112	5.0432
12.9024	0
35.7376	6.6816
5.248	0
3.456	0
34.3808	5.9392
30.6688	5.5552
43.8016	5.7344
15.872	0
12.6976	0
33.6128	6.0928
32.0512	4.4544
11.2896	0
51.6608	0
4.6848	0
15.9488	0
21.3504	0
58.5984	8.448
45.1584	4.6592
48.8448	5.9136
5.5552	0
18.944	0
2.5856	0
30.5664	12.8256
40.2176	9.6768
35.8912	4.3264
6.9376	0
39.4496	2.6112
11.9296	0
47.3088	7.7568
41.2672	5.9136
1182.87	214.784
73.1648	16.128
7.2192	0
47.1552	7.7568
465.075	79.4112
145.459	31.8208
7.936	0
7.7056	0
19.9168	0
4.7104	0
8.2176	0
34.4832	6.9632
39.8592	0.7168
5.0688	0
34.56	3.0208
6.144	0
104.115	26.1376
34.3552	4.5824
43.52	6.7328
8.6528	0
31.744	5.76
4.0448	0
62.5664	6.0672
9.2672	0
38.2208	2.3552
46.9248	11.5968
18.176	0
78.8992	17.3568
47.4112	7.0912
3.2512	0
47.6672	4.7104
12.5184	0
20.3008	0
48	6.0928
8.2432	0
39.9872	3.9424
32.9216	6.1696
14.976	0
33.5616	5.9904
35.6608	1.4848
98.2528	24.8832
9.2928	0
70.6048	12.288
13.5168	0
31.104	2.9952
14.2592	0
5.888	0
2.7648	0
43.136	4.1216
8.96	0
4.7104	0
157.645	20.7616
33.9712	1.8688
15.8464	0
26.5472	2.8416
6.9376	0
21.12	3.3024
33.6384	5.6576
74.8288	17.2032
5.5552	0
6.912	0
4.3776	0
47.3088	6.0416
6.5536	0
20.7872	3.8912
7.8336	0
7.3216	0
14.2592	0
83.2	14.208
282.65	79.7696
360.243	145.152
28.16	4.3008
8.7552	0
40.6784	4.5824
10.88	0
32.2304	4.9408
4.224	0
32.9984	8.7296
9.0624	0
8.2944	0
69.1712	10.4704
16.5632	0
555.008	146.586
26.1376	3.5328
5.8112	0
43.776	3.6864
37.9904	2.9184
7.6288	0
53.2224	8.1408
3.8144	0
36.3264	4.3776
21.6576	2.56
7.5008	0
40.576	4.5312
11.52	0
7.68	0
35.1232	4.4032
30.1824	4.9664
13.2096	0
42.7776	3.3024
36.992	2.2272
32.3584	4.1984
89.9072	20.48
36.7616	5.5296
3.4048	0
6.784	0
2.7648	0
5.8112	0
10.5216	0
38.3488	5.5296
20.5568	0
18.304	0
9.1904	0
6.7072	0
6.8096	0
8.96	0
28.672	5.12
38.0672	8.6272
5.9904	0
35.6352	2.432
19.7376	0
34.3808	3.7632
2.7648	0
13.824	0
57.6	8.0896
40.6016	5.4528
52.1984	14.208
32.6144	5.1456
53.9136	10.6752
38.9632	8.448
25.344	7.1424
109.389	33.7408
38.8352	1.8688
47.36	3.3792
6.5024	0
3.9424	0
5.3248	0
2.7904	0
33.28	5.8112
2.8416	0
64.9984	8.3456
58.752	6.144
4.6848	0
2.7904	0
7.5264	0
8.448	0
41.2416	4.4288
76.3392	13.5168
44.6976	6.784
58.9824	11.3408
9.7536	0
36.1984	2.4576
42.9568	6.1696
56.7296	5.4528
33.0496	1.28
74.24	8.704
50.9184	2.7136
31.2576	5.5808
59.776	13.4144
109.107	22.9632
26.112	2.3808
7.1424	0
9.0624	0
53.2736	8.832
6.9632	0
28.8768	5.2224
111.565	22.9888
2.8672	0
30.1824	4.8896
9.1648	0
10.752	0
9.7536	0
12086.1	1756.26
9.8816	0
36.0704	3.072
8.0896	0
37.12	5.5552
35.7632	1.664
12.9024	0
52.736	7.1936
52.3776	11.0336
37.376	4.224
533.248	125.594
6.656	0
714.829	148.634
46.7456	7.3216
36.864	6.6048
87.9872	13.1584
76.9536	19.9168
59.9808	12.0576
31.9488	5.504
36.7104	5.0176
15.488	0
16.7936	0.9216
51.84	8.3968
28.2368	0
110.464	10.3936
147.738	35.84
6.9632	0
9.6256	0
39.7568	8.3712
3.7632	0
39.3984	8.6784
37.7344	4.1472
7.6288	0
70.6816	15.1296
114.56	24.1408
35.6608	6.3488
14.8224	0
62.5152	12.288
7.8336	0
40.5248	5.7344
8.4736	0
123.725	33.2288
8.3456	0
9.728	0
45.184	8.0384
13.2352	0
3.4304	0
6.6816	0
33.28	7.2192
33.5104	6.2208
3.584	0
8.32	0
27.264	0
126.566	11.4432
39.3472	6.5536
31.7696	4.1216
21.4016	0
4.7872	0
32.8704	4.3008
5.6064	0
3.4304	0
37.12	4.5312
35.328	4.5824
39.5264	7.424
31.0528	5.4016
58.2912	14.1824
53.376	11.7248
47.8976	7.9616
33.3568	5.9648
4.0704	0
8.6784	0
36.1472	2.9184
78.8992	11.0848
40.1152	6.9888
35.968	8.0896
31.0016	6.9632
27.1872	4.5312
10.496	0
5.248	0
85.2992	21.5296
105.293	17.0496
69.0432	9.8304
38.2464	8.064
33.8944	2.9184
33.152	3.3024
75.0592	20.3776
145.818	23.936
13.3376	0
2.7904	0
5.9392	0
70.5536	0
3.8912	0
13.9776	0
13.4144	0
4.48	0
10.9824	0
49.024	7.4752
4.7872	0
4.6336	0
34.0224	4.1472
277.222	48.3072
13.952	0
32.3584	5.12
52.8128	6.6304
30.9504	6.0416
15.2832	0
6.0416	0
40.2944	6.912
4.2496	0
3.2256	0
38.6048	7.9616
63.1808	12.3392
28.5696	4.6336
17.3568	3.9168
40.0896	12.2112
40.4224	5.2992
65.8944	9.7024
36.096	4.096
5.0432	0
4.5568	0
3.5584	0
34.9696	7.1424
8.448	0
33.0752	4.224
9.9584	0
133.811	27.6224
37.1712	6.2208
30.9248	0
13.1072	0
72.1152	14.5664
2.8672	0
220.518	9.1904
28.5696	7.424
119.578	29.7984
39.1424	5.7344
45.3632	8.832
5.8624	0
50.6624	6.912
118.144	20.7872
56.704	5.1712
28.0064	4.8896
3.8912	0
4.3776	0
12.2368	0
34.7136	2.944
9.8304	0
31.3344	4.9152
3.0976	0
31.1552	2.3296
13.2096	0
5.6576	0
9.8304	0.0256
66.6368	7.296
146.765	35.1744
33.8176	3.1232
3.1232	0
119.654	28.3392
322.406	63.2064
8.2688	0
2.7136	0
36.5824	2.7392
6.3232	0
58.1888	10.4448
40.4224	3.8656
76.6208	9.3696
15.4112	0
39.8848	3.2512
5.376	0
3.4816	0
28.288	1.6384
71.808	9.344
8.6528	0
5.2736	0
44.7488	4.096
33.664	3.6864
41.3184	8.2688
5.6832	0
38.272	7.552
23.7056	3.8656
72.448	17.28
6.784	0
78.0032	14.208
7.808	0
35.712	5.0432
8.192	0
62.4384	7.6032
14.5408	0
54.8864	10.624
3.7888	0
9.6256	0
5.3504	0
97.2288	15.2576
23.2448	0
30.3872	3.456
60.1088	6.4
67.6352	19.072
42.8032	2.8416
2.688	0
61.4656	22.8096
108.237	15.36
30.7456	4.4288
159.923	52.8128
637.056	139.11
105.395	24.8576
47.4112	3.3792
46.5408	6.272
31.9488	5.0432
3.3536	0
70.0672	5.0176
41.0624	7.9872
36.7616	7.808
35.8656	6.2208
34.6368	0
43.6992	6.1952
3.6096	0
40.1152	1.7152
34.6368	2.048
56.704	16.256
3.8144	0
42.0864	9.1648
58.24	11.008
53.7088	5.0176
9.088	0
14.08	0
14.8992	0
3.6352	0
3.6608	0
2.9696	0
34.176	2.2784
6.528	0
3.84	0
66.9952	20.8128
63.7184	9.2672
8.4736	0
4.5312	0
43.0592	9.1904
3.7888	0
50.5344	3.3792
11.3152	0
6.656	0
7.7056	0
2.6368	0
13.5168	0
35.9936	0
4.7616	0
11.0592	0
66.048	13.0304
93.2352	14.2848
6.6304	0
61.5936	10.5984
35.328	2.7648
8.576	0
53.9392	5.8368
12.7232	2.5856
66.3808	16.5376
3.7376	0
28.0576	5.9136
2.7136	0
11.136	0
35.712	2.2784
9.3696	0
49.2288	10.624
67.3024	8.1408
2475.85	114.662
53.1456	11.3408
77.9776	11.6224
491.802	134.298
34.8416	3.2512
32.1792	5.6832
84.4288	17.2288
77.1072	19.84
21.8368	7.5008
57.6768	6.0672
7.0144	0
3.0976	0
504.371	89.4208
41.088	6.1696
70.2208	7.3216
45.568	8.8576
38.9632	3.6096
38.1952	4.992
41.0368	3.84
160.563	14.2848
684.672	156.8
5.0432	0
100.045	15.5136
28.6976	0
4.6848	0
32.2048	2.048
1460.61	236.134
49.5616	8.4992
34.1504	4.4032
31.232	2.1248
5.8112	0
35.5584	6.5536
5.5808	0
32.9216	1.6896
2.7904	0
41.6512	9.6768
14.8224	0
4.6336	0
2.944	0
7.168	0
22.2976	0
30.3616	6.144
27.4688	0
41.8816	9.216
39.7312	5.2992
238.694	95.2832
39.168	4.2752
3.7376	0
58.3424	3.4304
32.1536	2.8672
6.4768	0
11.0592	0
59.2384	10.1888
34.5088	7.3728
71.552	5.5808
35.712	8.8064
53.8112	9.1392
6.0416	0
22.9376	0
30.3872	2.8672
29.2864	4.608
596.838	117.606
36.736	2.9952
30.5664	1.5104
38.8864	2.1504
33.1008	5.1968
7.1424	0
26.496	2.304
30.1056	6.1952
28.8512	3.5328
8.6528	0
46.08	7.6288
29.4144	6.2464
33.2544	3.2768
17.1264	0
6.4768	0
89.0112	21.0176
37.8368	5.5296
11.8016	0
65.6384	12.6208
122.675	3.7376
8.4736	0
65.3568	17.3568
37.4272	2.2016
8.4736	0
33.8944	7.936
8.2432	0
3.4304	0
5.1968	0
12.16	0
30.08	4.5568
4.7616	0
60.7232	17.9968
38.4	4.2752
3.6096	0
28.9792	3.8912
117.632	35.1232
6.4256	0
58.2656	15.872
47.232	9.0624
39.0912	8.448
8.8576	0
39.3728	5.6832
7.3472	0
35.5072	2.8416
55.424	8.1408
10.9056	0
10.1888	0
11.3152	0
46.1824	8.1408
39.0912	7.552
31.104	4.48
6.9632	0
31.2576	5.504
72.4736	16.4096
47.5392	3.328
22.8608	7.4496
13.2352	0
3.1488	0
56.0128	9.0368
3.5584	0
17.4592	0
30.464	6.272
43.9296	7.2448
19.2768	1.4592
7.6288	0
34.56	6.3488
9.9584	0
8.5504	0
30.208	4.9408
42.8032	8.576
35.7888	8.5504
52.8128	7.6288
3.84	0
11.9808	0
4.3008	0
3.6608	0
5.1712	0
16.1792	0
56.3712	9.3184
30.8992	2.944
29.0048	2.7392
9.5744	0
53.632	10.1376
33.7664	6.3232
10.2912	0
5.8112	0
6.0672	0
3.4304	0
18.9696	0
26.8544	0
40.9856	8.0896
4.1728	0
192.742	32.9472
37.4272	8.6784
3.5072	0
36.7616	2.4064
3.712	0
32.1536	5.4784
53.4784	7.7056
8.8576	0
14.336	0
139.213	33.3312
3.3536	0
40.5504	6.5536
9.9584	0
12.1856	0
4.096	0
235.29	49.9712
3.456	0
6.016	0
14.8736	0.2816
16.3584	4.096
33.3824	6.9888
9.6512	0
6.0928	0
8.7296	0
32.0256	4.1728
47.4624	0
15.5904	0
3.0464	0
21.1968	0
11.2384	0
33.5104	8.1664
41.728	7.3728
50.5088	9.9328
65.3568	12.3392
47.616	13.6704
33.8688	2.7136
37.8624	0.2304
34.1504	7.168
38.144	5.504
52.4288	7.8848
12.2112	0
9.472	0
20.8384	0
33.6384	6.3488
35.584	1.1008
58.6752	10.2144
3.2768	0
120.934	26.368
19.6096	0
7.552	0
12.9792	0
36.7872	8.2688
11.648	0
9.0368	0
40.3456	0
6.3488	0
137.728	32.2304
11.52	0
5.6064	0
38.8608	15.2576
6.0672	0
45.7984	3.5584
4.3776	0
23.3216	5.3248
55.936	10.1376
121.728	27.1104
99.584	16.4608
46.848	10.88
35.712	3.328
9.2416	0
13.0048	0
24.96	2.8928
11.6224	0
43.0336	5.8112
34.3552	3.456
106.931	0
19.0464	0
38.7328	6.3488
35.5328	4.5824
43.7248	5.6064
31.232	4.3264
57.2928	13.2864
2.7136	0
53.2224	12.416
23.1936	2.9696
87.5264	5.248
39.7056	8.4992
36.3776	5.2736
37.3504	8.0896
8.2944	0
9.7024	0
81.6384	14.336
36.992	2.0736
7.4496	0
3.328	0
67.968	14.0032
6.3232	0.0256
2.5856	0
7.6032	0
6.1696	0.0256
58.624	10.88
8.1408	0
6.784	0.0256
8.6272	0
13.6192	0
50.7136	6.4512
114.202	24.9088
60.1856	9.1904
67.7632	13.0048
56.064	7.7568
34.4064	6.6304
36.4544	4.224
3.2256	0
36.864	1.0752
5.7088	0
41.344	6.2464
32.2048	3.6352
45.4912	3.6352
5.0176	0
2.6368	0
21.9392	0
94.72	19.9168
38.0672	8.7552
54.4768	9.7792
27.8272	4.1728
30.7712	6.5792
27.2128	2.2016
11.264	0
47.5136	6.4256
61.0048	11.0848
40.2944	6.3488
44.9792	6.8864
33.792	7.7568
56.6528	8.0896
3.1488	0
3.6352	0
38.0928	8.0128
73.8048	9.4464
8.6784	0
59.3152	11.6224
30.5664	6.5536
29.2608	6.1696
76.4416	18.7648
12.1856	0
1710.18	453.709
41.5488	7.8336
58.5216	16.8192
31.2832	5.4272
31.7184	5.76
3.4304	0
32.3072	7.3216
63.616	13.312
3.1744	0
32.128	3.3536
35.9168	6.2208
5.4784	0
59.1104	14.3616
37.6064	5.632
3.84	0
35.0976	4.2496
8.1664	0
45.9264	5.8368
58.0096	13.5168
46.9504	7.5776
48.3584	11.8016
54.912	11.1616
10.9056	0
35.7888	2.6624
82.8672	19.84
6.0928	0
41.2416	6.2464
3.6096	0
27.5712	1.6384
66.4832	11.4944
38.9376	3.84
7.808	0
48.896	5.12
63.5136	10.3168
49.92	0
44.6464	5.9136
358.707	114.278
30.5664	5.0944
6.4	0
61.312	11.3152
5.4784	0
19.584	0
49.9712	14.2848
67.0208	15.232
4.1984	0
35.4048	0.3328
4.8896	0
148.301	32.9472
33.8176	4.3008
35.072	3.9168
3.4816	0
42.7776	7.168
1690.04	273.894
77.568	21.632
67.7632	6.6816
14.4384	0
29.2608	0.0512
11.6224	0
33.7408	2.7392
2.6112	0
41.1136	7.0144
950.733	182.195
32.8704	5.4272
4.0704	0
5.376	0
21.8368	6.1696
7.936	0
10.6496	0
90.368	18.5088
4.8128	0
3.4048	0
10.0608	0
11.3152	0
28.1088	3.6352
481.613	21.8112
12.288	0
45.8752	0
84.7872	12.5696
46.1568	9.7792
38.8352	3.6608
28.7232	5.1712
36.1216	6.5536
32.3072	8.7808
59.904	5.5552
20.1472	4.4544
141.133	26.112
36.7872	10.6752
36.6848	7.7056
4.7104	0
22.8864	0.2304
56.9344	14.2592
32.4864	5.4272
29.5936	1.5104
37.3248	5.8112
5.0432	0
7.7056	0
2.688	0
30.2336	3.4816
35.1488	5.4016
48.2816	1.7408
69.888	14.8224
37.7344	3.5328
30.9248	2.7904
30.6432	3.1744
87.6032	19.3024
35.7632	5.5552
31.1808	5.1968
4.0192	0
57.6	10.5216
43.3152	4.6336
49.92	11.008
23.3728	4.48
42.5216	8.0128
2.8928	0
60.544	12.5696
144.819	0.9472
15.7696	0
50.7392	13.696
83.2768	10.1632
38.9888	7.6544
169.37	44.288
50.6112	5.6832
29.1328	5.7088
6135.91	550.989
29.5424	6.5024
8.8576	0
5.8368	0
4.864	0
33.2544	6.6048
7.04	0.0256
9.472	0
6.912	0.0256
9.2672	0
59.6736	9.3696
10.1888	0
7.168	0.0256
5.5552	0
118.272	28.5696
3.4048	0
7.3728	0.0256
15.6416	0
14.0288	0
32.8448	0
48.1024	7.808
30.3872	8.0384
45.6704	3.9424
3.84	0
32.0768	3.1744
28.672	3.5328
39.2704	9.0112
29.1328	7.6032
34.7904	2.5088
3.0464	0
2.6624	0
56.7296	8.448
43.9552	6.1952
56.8576	8.8064
47.872	7.4496
47.0016	9.1392
31.2832	0
3.9424	0
34.5344	7.3984
139.187	36.096
63.0784	12.5696
28.8	0
49.28	13.2096
2.8672	0
7.7824	0
128.742	20.2752
16.1024	0
35.4304	7.6288
43.2128	7.8336
42.0608	2.176
95.4624	26.7776
37.4016	2.944
40.1152	7.2448
44.6208	9.9328
33.2032	6.3488
28.2624	0
53.8624	7.0656
3.2512	0
7.552	0
10.8544	0
14.0032	0
35.4304	7.04
7.68	0
6.528	0
35.8656	2.432
50.0224	6.784
3.456	0
37.12	5.4016
3.5328	0
38.4256	6.4768
49.4336	0
43.9808	3.9168
2.9696	0
230.886	52.5824
37.4016	6.8096
32.3072	7.7824
55.6544	8.6784
97.0496	22.9632
6.3232	0
7.8592	0
32.1792	0.128
40.576	8.2944
4.7872	0
21.12	0
6.0928	0
125.184	36.992
27.136	0
21.2736	0
3.1488	0
216.55	29.1328
4.224	0
33.0752	7.7056
39.7312	2.8928
39.3984	6.656
8.2432	0
34.0224	3.9168
8.4992	0
41.2672	7.168
8.7552	0
36.5568	1.8688
3.9168	0
7.8336	0
37.6064	6.4256
6.9376	0
56.6784	10.0608
61.8496	18.4832
31.5648	7.0912
28.7488	3.5072
4.5056	0
62.4128	6.6816
125.901	30.1568
46.2336	7.3472
3.8912	0
41.088	8.576
119.936	28.2624
32.4096	5.2736
5.5808	0
13.5424	0
164.864	29.1584
79.0272	18.4064
36.2496	7.4496
4.9408	0
30.6688	6.6304
11.1872	0
4.3264	0
33.792	7.2192
11.4688	0
38.3232	2.4576
40.1152	5.1968
42.496	9.3952
49.9456	8.5248
38.2976	4.2496
35.0208	6.5024
52.1472	13.8496
79.104	18.432
54.272	8.1664
9.6256	0
39.0912	5.4784
47.4624	9.4208
7.0656	0
46.976	10.1888
32.4608	4.0704
44.2112	8.2688
37.0688	7.9616
86.0928	21.7344
34.7136	7.3728
34.7648	1.8176
34.9696	6.1184
3.9424	0
14.4384	0
31.5648	7.1424
63.0016	3.9168
5.888	0
4.992	0
32.7936	1.4848
33.5616	5.9136
23.2192	3.84
13.7728	0
65.2544	17.4592
2190.31	303.104
122.419	31.6928
3.4816	0
58.3424	5.0432
42.8544	7.5264
5.9392	0
6.6048	0
62.8992	15.1808
9.5744	0
90.7008	11.136
42.752	5.888
36.8896	6.7328
42.0608	7.2448
678.144	142.438
72.8832	16.7424
31.6672	6.2208
5.7344	0
11.8016	0
20.096	0
9.1392	0
40.5504	7.8848
134.17	33.9968
31.8976	5.7088
34.0992	5.0944
3.968	0
47.5392	3.968
82.2016	11.648
37.6832	6.7584
7.1424	0
7.8592	0
98.3552	14.976
33.2032	4.992
215.373	37.504
6.2464	0
30.4384	7.8592
2.688	0
3.0464	0
13.4144	0
39.6288	3.8912
42.0352	5.7088
60.7232	12.1088
38.6304	8.2944
40.6784	3.1744
18.4832	2.4064
31.4624	5.3504
49.0752	6.6304
38.144	8.2432
2.9184	0
72.5248	10.496
32.8448	0
36.8896	6.528
31.4368	4.2752
6.272	0
11.8784	0
5.7856	0
9.0368	0
32.4864	7.2448
27.8784	5.6576
54.0416	9.9072
49.2544	10.3168
11.5456	0
5.0688	0
41.8048	8.7552
41.5232	4.5824
7.04	0
49.9712	12.8
39.1424	7.3728
34.1504	7.168
13.056	0
4.7616	0
55.8848	12.8
11.8016	0
5.5552	0
30.5664	4.0704
6.5024	0
524.339	101.632
6.9888	0
5.9392	0
6.2208	0
6.272	0
31.4624	3.8912
2.5856	0
4.6848	0
47.3856	7.9616
33.4848	0
6.0672	0
16.9472	0
59.5712	12.544
33.5872	4.096
3.328	0
5.7088	0
10.9824	0
31.6672	4.2752
43.6224	9.6512
54.1696	3.968
7.3472	0
21.8624	0
16.0768	0
3.2	0
51.6352	8.6272
10.5216	0
4.4544	0
76.1344	13.7472
13.3632	0
35.3024	3.0464
8.7552	0
37.4784	3.2768
718.234	155.136
47.104	12.1088
53.0432	9.4976
33.8432	3.328
38.016	2.304
43.2384	5.376
7.5776	0
53.5296	12.6208
101.427	29.184
173.158	18.5088
7.6032	0
37.1712	3.2256
11.3664	0
30.6432	5.76
31.5904	1.408
11.0848	0
29.2608	5.2992
118.656	26.2656
183.296	39.0656
64.0256	14.1312
40.576	9.0368
58.2144	10.9824
52.7616	8.96
20.7872	0
8.4736	0
6.528	0
41.0624	8.2688
69.376	17.2032
73.3952	16.256
165.658	48.64
55.5776	6.784
31.0272	4.6848
49.5872	5.8624
12.8256	0
51.6352	7.0144
68.0448	14.1824
3.1232	0
36.7872	4.4288
68.6336	11.9808
7.168	0
5.376	0
36.5312	6.144
35.7376	1.2288
33.536	4.8384
32.2304	3.712
20.8384	0
36.6336	4.736
6.1184	0
32.2048	4.6336
38.6048	5.7088
31.616	2.0224
4.0192	0
8.704	0
28.1088	2.9952
9.2416	0
43.1616	0
10.2144	0
50.9184	9.4208
31.6928	5.9136
59.4688	9.6512
34.5344	0
6.2464	0
42.8032	5.6064
20.5056	0
7.2192	0
6.0416	0
75.1872	9.5488
3.4304	0
67.1488	13.2352
4.608	0
10.6496	0
45.2608	7.0144
15.2832	0
6.6304	0
43.0848	4.5056
34.2016	5.3248
31.9232	2.048
25.7792	5.6576
84.1216	20.7872
98.2016	15.8208
64.6912	7.6544
262.272	37.4016
28.032	2.1248
15.4368	0
11.4176	0
34.6112	6.0928
15.6416	0
49.6896	8.448
9.2928	0
28.9024	3.584
46.2592	9.856
45.3888	6.0416
4.5056	0
33.0496	5.504
33.6384	3.328
34.7904	4.608
35.584	6.016
77.7728	11.5968
40.5248	6.8608
33.408	4.736
31.9488	0.7936
26.9568	1.5104
9.7792	0
29.4912	3.584
3.6608	0
42.368	10.3936
33.7152	3.6352
3.2256	0
6.9632	0
50.7904	15.5392
102.886	19.6352
36.4544	2.2528
33.0752	5.6832
35.5072	3.6096
74.4704	10.1632
6.912	0
35.4816	3.3792
3.2	0
8.6272	0
4.7872	0
10.88	0
15.3344	0
21.2224	1.408
53.9648	6.5792
35.0976	0
31.9744	2.432
279.654	12.1856
46.3872	7.936
6.2976	0
9.7024	0
56.704	10.5216
5.632	0
70.4	14.2848
68.0704	9.6512
150.81	41.9328
38.2208	6.784
9.0368	0
26.5984	5.1968
5.6064	0
19.2512	0
30.4128	3.2768
64.6656	10.9824
64.3072	17.3312
72.0384	0.2816
2.7136	0
4.0448	0
31.1552	5.1712
173.722	46.336
37.0176	2.432
5.8368	0
30.336	5.632
3.0464	0
31.0784	5.8368
30.1056	1.5104
48.6912	4.2496
37.0176	4.0192
30.5152	0
32.1536	2.3808
15.9488	0
39.552	3.328
34.6368	8.2432
56.2944	9.7024
72.6784	8.2432
6.9632	0
3.7888	0
4.3776	0
25.4976	0.6912
624.742	10.5728
21.8624	6.016
34.048	4.1984
50.8928	9.3696
36.4032	7.2192
5.1968	0
4.9408	0
9.7536	0
2.9184	0
37.1968	4.4544
6.144	0
60.8512	6.6048
8.7296	0
37.248	2.9184
14.6688	0
14.1568	0
661.581	130.662
6.8096	0
7.2448	0
29.7984	3.5584
42.3168	8.6016
51.6608	9.6
13.2096	0
3.712	0
5.8112	0
20.3776	0
32.6912	2.176
186.24	32.4096
6.4	0
67.1744	12.16
5.2224	0
153.677	20.4032
710.81	85.3504
82.3552	20.3264
49.5872	5.2992
30.4896	5.1712
39.7568	5.5552
3.7376	0
4.4544	0
33.2544	4.5824
57.8816	12.2624
35.5072	2.4832
63.872	10.496
33.6384	4.8128
8.192	0
56.6528	0
36.0192	6.1184
37.5552	2.7904
5.8368	0
18.4576	0.6656
11.4688	0
14.1056	0
42.5984	5.9136
10.88	0
6.8608	0
97.408	14.3872
58.624	11.8784
32.9216	6.6048
12.8256	0
35.584	1.92
65.9456	12.5696
39.0656	8.448
43.8784	2.5856
3.8656	0
32.512	3.9168
33.5616	0
4.7616	0
13.8496	0
10.1376	0
3.072	0
3.3536	0
8.704	0
15.7696	0
36.1472	3.3536
6.5536	0
5.8624	0
78.5152	14.848
3.6352	0
58.0608	10.3424
109.133	17.1776
39.6544	5.0944
6.6048	0
3.3792	0
38.9888	6.3488
34.048	5.1456
89.8816	14.2848
36.5056	2.9952
42.88	7.0144
92.4672	14.6432
8.3968	0
29.8496	5.2224
3.4304	0
84.8896	19.0976
36.8384	8.3712
19.4048	0
7.3728	0
32.6144	5.1968
6.7072	0
6.6304	0
72.0896	4.5056
4.1472	0
38.784	7.3728
23.8848	3.9936
37.6832	9.1904
46.336	8.4736
20.8128	0
125.798	29.9008
10.4704	0
2.6368	0
31.2832	5.9136
38.1952	7.0144
57.344	11.3664
4.48	0
50.9696	5.6832
9.0112	0
14.08	0
20.6592	0
5.4016	0
4.0704	0
45.056	6.0672
49.664	7.68
51.1232	8.9344
6.1696	0
6.8096	0
41.1904	5.3504
7.4752	0
11.7504	0
47.104	4.8384
30.72	2.5088
2.5856	0
35.9424	7.1424
3.4304	0
7.9616	0
58.8288	7.0656
57.5744	6.144
111.155	22.3488
104.038	19.6352
3.3024	0
30.336	4.3008
3.6352	0
2.816	0
17.5872	0
3.712	0
88.7296	21.0944
11.008	0
6.912	0
3.6864	0
7.1936	0
6.4512	0
71.5008	11.264
72.6016	9.9328
36.224	5.6064
3.3792	0
69.8112	10.8032
7.4752	0
50.9952	7.0144
558.157	100.301
130.79	37.1968
33.1264	2.944
54.016	8.704
90.1888	37.76
2.8416	0
90.2912	18.8672
43.7248	6.0672
120.576	0
50.176	7.68
30.0032	4.7872
50.944	8.1408
40.0384	4.48
57.5232	8.5504
46.8736	4.352
9.2416	0
28.8768	4.6848
7.1424	0
10.7008	0
31.104	4.608
27.5712	2.3552
4.9664	0
48.2048	8.8576
11.9296	0
56.9088	0
6.8608	0
39.808	7.552
15.5904	0
88.9088	27.2896
13.7216	0
42.4192	4.8128
12.7744	0
15.7184	0
29.0048	4.3776
66.9184	12.928
65.2288	13.6192
6.1696	0
32.0256	5.0176
3.7376	0
38.0416	5.2736
3.6096	0
3.9168	0
26.0864	2.048
28.1344	3.5072
72.4736	13.6448
31.5136	4.4032
46.2848	7.8592
37.632	6.0928
173.133	33.792
84.8896	21.4784
35.3536	6.3232
7.7824	0
13.8496	0
9.4976	0
2.6112	0
4.4288	0
4.5568	0
36.0192	2.1248
134.886	22.2976
2.6112	0
47.5136	7.1936
23.424	0
67.328	11.4944
12.5952	0
73.8816	13.0816
44.672	6.9376
45.1584	6.6048
188.186	48.7424
79.4368	16.1536
33.5104	4.9408
36.9408	3.5584
3.5584	0
3.3792	0
39.936	4.4288
63.7952	12.8512
123.366	6.144
3.4304	0
134.502	44.1856
4.8384	0
47.0016	10.0608
72.576	17.1008
28.544	3.5328
11.9296	0
61.4144	8.1152
6.6048	0
34.304	3.3536
2.944	0
70.5024	9.7792
10.9056	0.2816
100.198	21.0944
28.032	4.0704
43.8528	0
67.5328	12.1344
41.6768	4.224
36.0704	7.3472
6.656	0
5.2736	0
12.4416	0
7.296	0
39.68	2.4576
4.9664	0
31.7184	2.4064
32.8192	5.8112
3.0208	0
44.416	5.7344
8.2944	0
5.6832	0
34.2016	6.144
34.944	2.1504
11.52	0
37.4784	5.7088
98.4832	19.2512
32.4352	6.9376
11.9552	0
37.8624	0.9472
6.5792	0
41.728	3.4048
78.1312	0
4.3264	0
1910.99	397.466
39.1424	4.4288
4.864	0
14.7456	0
4.4544	0
65.4336	13.7472
6.4256	0
79.0784	12.9792
12.8	0
33.8176	3.584
5.6832	0
61.6192	9.4976
446.208	5.6832
12.9024	0
78.4896	13.9776
38.0928	6.8864
30.4384	2.7648
11.7248	0
7.5776	0
2.8672	0
184.627	34.9184
2.7648	0
5.4528	0
39.4752	5.376
13.2864	0
8.064	0
38.5024	5.0432
2.5856	0
9.8816	0
2.6624	0
61.5168	12.9792
103.654	17.7152
7.2704	0
3.9424	0
32.1024	4.9664
14.1824	0
593.562	123.648
9.0368	0
5.2736	0
11.8016	0
71.1936	17.8944
30.2848	4.2752
24.4736	1.8688
6.6304	0
4.864	0
14.8224	0
36.864	5.0432
9.984	0
3.584	0
3.4816	0
10.3168	0
43.9296	5.4016
7.5776	0
36.736	5.12
100.915	13.3888
29.4656	3.4048
24.8576	4.608
58.6752	10.0608
11.52	0
31.4368	2.8672
7.9616	0
7.8336	0
65.5616	11.8272
7.0144	0
4.7104	0
14.1824	0
30.6944	4.1984
34.2528	4.9664
33.28	6.2464
44.1344	4.096
70.8096	12.8768
38.2208	6.9888
28.16	3.1488
6.528	0
38.4256	2.3808
5.7856	0
64.0512	12.288
2.688	0
6.7584	0
25.216	0.5632
66.7648	11.9552
3.712	0
36.0704	3.0976
37.8112	5.4528
10.5728	0
8.32	0
39.5008	5.9136
4.5056	0
41.9328	5.1456
8.448	0
36.1728	3.5072
2.8672	0
322.509	57.5744
35.84	4.3008
3.3792	0
41.4208	3.8656
8.704	0
32.7424	4.7616
2.6112	0
2.7392	0
11.136	0
45.0048	5.4016
8.5248	0
4.5824	0
24.8576	3.4048
41.9072	6.3744
6.144	0
14.592	0
24.064	0.8192
5.248	0
42.7264	8.9088
34.2016	5.6576
12.7744	0
7.6032	0
6.6048	0
8.448	0
8.6528	0
21.1712	3.2256
19.0208	0
105.037	17.5872
11.2384	0
9.216	0
48.9216	8.2432
35.3792	6.8864
35.4048	2.816
5.504	0
10.1376	0
84.3776	6.4768
9.2928	0
4.224	0
36.0704	6.3744
2.8416	0
73.472	15.3088
171.955	33.152
37.2992	2.9952
2.944	0
47.9232	5.76
28.9792	2.432
7.936	0
2.944	0
34.688	5.8368
16.256	0.2304
37.2992	3.1232
3.8144	0
37.0688	2.1504
10.5728	0
146.534	31.8976
12.6464	0
511.949	102.221
4.5568	0
6.1696	0
[truncated: 29,361 more rows]

## Sheet: Fig 2D raw beads
droplet_area	cell_area
77.4912	48.256
27.52	13.9264
455.552	77.1072
24.32	12.7232
124.621	65.6128
63.7696	36.8128
3.6096	0.128
213.683	43.9552
93.7216	50.9952
47.7184	26.5728
44.8768	22.7328
37.376	20.0192
33.2544	17.0496
27.4944	13.056
80.0512	45.7472
26.0096	13.4912
55.1936	27.0336
50.8928	24.32
156.467	78.3104
56.1408	30.6432
38.1184	20.48
28.16	12.8512
26.8288	14.1568
73.7536	43.3152
27.648	13.4912
114.611	64.2304
33.3824	16.8192
31.0784	14.976
117.325	67.0464
94.976	54.1184
22.0928	9.9584
116.07	54.272
32.3584	14.4896
217.958	115.456
27.1872	12.3648
49.3824	27.648
247.578	44.2624
58.1376	33.8176
85.6064	51.5584
26.8288	11.4944
76.1856	40.7808
36.1472	19.8912
28.7488	14.1568
45.6448	22.8608
58.7776	32.128
39.1424	20.2752
46.72	24.448
46.848	27.1104
73.728	42.1632
20.0704	8.0384
33.9712	18.2016
53.7344	29.824
88.9344	49.7664
38.3744	20.9152
99.7376	48.7424
76.416	43.6224
110.31	55.5776
93.4912	53.4784
128.768	67.3792
36.9664	19.9424
29.7472	13.9264
36.3008	18.048
104.09	60.2368
65.28	36.4288
42.9056	21.888
37.2736	20.096
23.8336	13.312
113.075	58.5216
36.9408	20.1728
249.242	64.6144
39.5008	19.7632
33.408	16.64
110.925	62.5664
31.0016	14.4896
46.464	23.808
79.3344	39.5264
34.4064	15.9744
51.2256	25.6
81.2544	43.4944
42.1632	21.6832
34.5856	17.7152
37.1456	18.4832
52.608	29.0816
33.0496	16
44.5952	25.5488
118.938	60.6208
23.936	10.7776
28.5952	14.592
60.6464	33.0752
35.6864	18.3808
36.096	16.2816
26.2912	13.1328
45.2096	22.1184
96.3328	57.344
34.7136	18.5856
48.6656	25.6256
48.8448	25.6256
59.6992	33.5872
55.2448	27.2384
74.2912	35.968
52.2752	28.3392
157.491	86.9888
23.8336	11.136
38.1184	18.4832
45.824	22.0928
26.1888	13.3888
50.7136	25.984
107.418	54.1952
116.966	71.6544
336.538	151.731
19.4304	8.0896
16.7936	7.7824
30.9248	14.7456
25.9328	10.9056
66.9696	33.6896
56.2432	32.4864
54.272	34.4064
60.0832	32
104.218	57.1392
40.0128	21.632
26.2912	12.288
48.3584	24.2176
77.7472	43.52
48.256	27.4176
92.672	48.2304
72.5248	29.8496
60.672	31.616
29.44	13.9264
41.9072	21.0432
35.5328	17.7152
33.3056	16.1792
42.112	22.3744
45.1584	24.0384
37.0432	18.8928
40.1664	18.6368
21.7344	9.6768
33.1264	15.0528
26.752	12.1856
34.048	16.4096
21.504	10.2656
65.2032	34.5856
48.768	27.6736
107.238	56.9856
47.0784	26.3936
56.2176	29.2352
34.9696	17.3056
51.6352	26.5216
31.616	15.7696
69.1456	34.4576
207.77	105.882
40.9856	21.4784
35.8656	17.28
77.952	43.904
50.3808	25.6
91.1104	45.952
45.2608	22.4
88.7296	43.7504
50.9184	26.1376
44.2624	21.6064
25.0112	12.3904
24.576	12.1856
97.536	54.4
71.4496	40.6016
51.2768	26.3424
35.2512	17.7152
39.8336	20.2752
56.448	29.7984
85.6576	43.8272
92.032	44.9792
64.9728	33.6896
40.0384	18.3296
105.702	54.4
63.3088	33.2032
44.8512	23.5776
29.2608	15.0528
32.0256	16.0512
37.9904	19.7888
34.688	18.9952
355.123	197.325
57.3952	31.1808
38.784	19.968
76.032	39.6544
50.9696	25.472
44.6976	21.4528
26.496	11.776
16.0768	5.4272
60.288	30.336
89.9584	46.08
43.4432	21.3504
70.3232	37.2992
34.5856	18.3808
64.4096	37.7856
52.3776	27.9808
105.114	49.408
32.4608	15.7184
48.9216	23.68
33.3312	16.7168
43.7504	23.5776
33.408	16.384
68.7104	35.328
50.1248	24.9856
88.32	50.2784
71.936	36.9664
148.224	66.7136
45.2352	26.1888
25.9584	13.2864
69.2736	39.5008
30.72	15.8976
67.3536	36.5824
41.4464	21.0432
60.6976	32.0768
29.1584	14.3104
75.0848	35.5584
122.035	56.6272
32.6656	16.3328
32.512	16.512
259.994	77.9264
98.9952	48.9216
59.8272	32.7168
40.1664	21.6832
66.1504	34.4064
142.285	63.7184
23.2192	11.2896
59.5968	31.7184
84.1216	42.4192
36.9408	17.3568
99.8144	52.6336
74.7008	36.6848
47.232	24.8576
54.016	27.4944
26.6752	13.0048
27.0592	13.056
72.9856	38.5792
58.0608	31.6672
46.6688	26.4448
66.7392	36.0704
37.1968	19.8144
29.2352	14.336
370.202	175.258
23.8592	12.2624
33.3568	17.5104
26.0352	13.0304
38.656	20.6336
39.0656	20.736
49.1264	26.4192
44.7232	24.8064
69.1456	34.7904
38.784	19.0208
57.0624	32.7168
212.966	115.251
33.9456	18.1248
44.0832	25.984
56.832	32.2304
59.52	33.152
135.936	70.1184
10.6496	1.1264
48.896	23.8592
26.1632	12.9536
60.5696	33.28
77.2608	40.704
25.6256	13.0816
24.32	11.0592
133.53	75.4176
34.56	17.0496
32.8192	17.4848
112.205	52.1728
39.9104	21.5552
73.0368	40.7296
249.754	135.501
44.1856	21.6832
27.3152	14.08
169.139	96.8448
35.9424	18.5088
137.651	71.6544
75.2384	36.864
35.0208	18.1504
192.41	48.9728
103.117	54.528
40.576	21.9136
70.4512	39.168
29.4912	14.2336
24.6272	11.8528
58.1632	32.2816
77.5936	39.6032
25.9584	13.1072
44.7488	24.8832
36.8128	20.5568
78.4896	45.1072
37.248	19.6096
81.6128	46.1056
33.7408	19.072
44.5696	24.0896
119.45	66.7904
27.3664	14.08
59.5712	31.2064
36.2496	18.0224
478.438	89.984
50.4064	25.8048
68.8128	41.0112
104.576	56.4224
37.6064	20.5824
67.1488	36.5568
26.3424	14.08
16.3072	7.4496
63.744	32.5376
96.9728	51.8144
32.6912	18.3296
26.2912	12.6464
158.541	79.1296
1893.32	136.294
270.976	55.8592
38.2976	20.4032
42.0352	22.4256
34.56	16.0512
34.7392	17.3056
38.9632	19.072
92.5184	45.3376
86.8096	49.4336
37.7856	19.5584
46.4384	24.7552
307.866	56.3456
106.266	57.1392
39.68	21.5552
100.096	48.7936
35.0976	18.7136
8.1664	0.8448
21.5552	10.9824
124.288	56.4736
56.832	24.7296
114.099	55.8336
41.1392	21.248
53.3248	28.3648
16.7168	6.7072
23.5264	11.0592
36.0192	19.9424
100.198	47.5136
109.414	57.1136
32.3584	16.9472
40.2944	18.6368
36.1728	18.1248
33.5104	15.3856
379.853	51.456
23.04	9.7024
24.96	13.7472
58.88	29.7216
86.8096	49.2544
36.8384	17.5616
48.7168	25.6768
39.7312	19.3024
79.8464	38.6048
23.5008	11.1104
47.4112	24.0896
26.752	14.1312
38.5792	20.4544
39.1936	18.5856
53.5552	29.2352
91.5968	49.536
61.696	36.0192
28.4928	15.36
106.035	55.5776
26.9568	6.1184
31.1808	14.3616
20.5312	9.7024
44.8	21.4784
98.56	54.8096
59.2128	33.024
41.0112	19.712
49.5872	27.7504
99.1488	54.3232
46.5152	22.784
65.2544	35.584
91.1104	45.4656
34.3552	16.6656
25.0624	11.904
21.5552	11.2128
31.6672	15.3344
44.1344	25.2416
63.0528	31.872
111.437	59.2384
70.8352	34.9184
54.2208	30.5408
21.5808	9.0368
32.64	15.2576
83.9168	47.616
28.7744	13.2352
183.629	59.3408
101.376	48.6656
32.7936	17.1264
10.5216	3.5584
99.3024	43.0848
32.9984	18.9952
32.512	16.6144
50.8416	25.3696
35.5584	19.9424
38.784	19.6864
145.075	66.3552
78.4896	42.8544
75.2128	39.8336
212.454	104.96
23.5264	10.3936
23.552	7.7568
48.4608	24.6272
42.1888	19.1232
32.1024	15.616
80.9728	36.5312
26.624	13.0816
48.9728	26.8032
24.7808	13.44
59.52	32.896
44.9024	25.0112
55.4752	27.9808
42.4448	23.296
26.1376	13.5424
53.8624	31.4624
22.8864	11.2128
36.736	19.2256
25.7536	12.5952
35.3792	18.9184
94.8224	49.2288
77.5936	39.04
27.648	13.8752
39.168	19.0976
77.7728	43.2128
66.2016	36.4032
37.1456	18.8672
49.5616	24.7808
62.5664	32.3584
35.8144	20.0448
34.9952	19.7632
177.869	86.8608
103.04	58.7776
82.0992	45.0048
1755.52	165.043
30.1312	15.6416
50.2528	25.2672
27.1872	14.208
51.456	26.9056
26.2656	13.1584
32.2816	17.1008
27.0592	14.2848
23.3216	11.2128
34.6112	19.7888
24.6528	12.544
37.7344	17.8176
55.808	30.5408
98.048	52.8896
38.8096	18.7136
65.664	33.7152
35.0976	19.0208
34.7904	18.7136
83.7632	44.5696
27.2896	14.9248
49.0752	23.8592
77.8496	41.8816
143.693	62.72
34.7392	18.9696
103.757	57.4976
86.1696	38.5536
41.8048	23.5008
82.2272	43.1616
37.76	18.9952
35.2512	18.048
69.2736	37.504
33.9456	17.1264
182.17	101.53
33.8688	17.8944
81.2288	38.4256
35.9424	20.2496
29.0304	14.976
74.1376	34.2784
25.1136	11.3408
270.541	113.306
61.696	32.9472
22.4256	10.4192
66.1248	33.408
47.2832	25.344
38.8096	20.2752
105.472	57.7792
130.458	54.4256
58.9824	33.8176
70.528	34.0224
34.8928	19.712
22.6304	10.0096
58.2144	30.3104
101.683	48.7168
37.4784	20.9408
26.9568	12.9536
34.56	17.9712
136.755	68.4032
47.8464	27.392
567.424	108.134
33.5872	16.7168
380.621	112.64
92.8768	51.5584
689.152	121.114
64.8704	35.0976
190.029	98.9184
123.546	61.184
39.5008	21.9392
57.1392	31.3856
55.1936	31.2064
39.5008	22.5792
47.3088	27.136
113.664	55.4752
68.8384	35.1488
48.64	28.8768
42.3168	22.3232
86.4512	47.36
48.7936	25.9328
139.853	73.5488
40.832	21.2224
45.1584	23.296
146.355	77.4656
457.062	117.811
37.376	21.1968
37.7344	19.0208
34.7136	19.8656
290.688	33.1776
25.3696	12.0064
143.77	79.36
26.0352	12.5696
53.6064	31.488
66.2784	37.1712
33.28	17.1264
30.8992	14.4384
21.7856	11.264
115.661	58.1376
137.882	72.7808
493.261	87.9872
63.1808	34.4832
68.1216	33.3568
29.9008	15.6672
56.3456	32.256
46.0288	26.752
50.6112	26.2656
58.752	32.256
51.2256	26.8544
44.3904	24.4224
48.2304	27.8272
34.3296	18.432
38.8352	20.3264
51.0976	27.4944
39.5008	21.1712
24.6784	12.1344
80.3584	40.7296
128.563	67.5328
41.8304	22.656
35.968	19.4816
31.36	16.7168
85.2736	45.7216
53.7344	30.464
35.712	20.224
93.824	49.408
54.3744	30.336
39.4752	21.1968
70.5024	38.8352
738.509	90.5472
54.7584	32.2048
37.9648	22.4512
52.608	27.8784
34.9696	20.4032
116.019	60.0576
31.616	14.3872
161.613	85.0176
57.9584	33.28
81.92	43.9808
42.0096	24.6528
64.4352	35.328
55.0144	30.1056
115.661	66.432
65.664	34.944
56.2176	31.8976
37.6832	20.7872
30.8992	15.36
46.0288	24.832
43.2896	25.0112
51.9168	30.0288
37.12	19.6352
28.0832	14.0544
37.0176	20.5824
66.4576	38.7584
32.1536	17.0496
532.685	56.0896
71.5264	40.5248
287.539	134.272
113.331	68.1472
207.667	102.246
25.9328	12.5952
111.206	50.8416
36.2496	19.0464
23.296	11.3408
24.832	11.8272
174.285	87.3984
58.3168	33.6128
25.8816	13.4656
305.741	48.3584
93.0816	48.6912
36.6336	19.84
12.6464	5.4784
116.019	64.8704
37.376	21.248
34.432	19.0976
43.264	25.2928
156.826	87.3728
35.2	20.5824
37.1456	19.6352
177.69	103.731
28.1088	13.3376
38.8096	19.7376
101.146	60.6208
34.5088	18.9696
129.126	76.1856
41.7536	21.7856
143.309	80.7936
88.3968	51.6608
64.3072	35.5072
32.7424	17.28
269.85	134.144
23.552	12.3648
291.379	56.2432
45.0816	24.7296
63.6672	34.688
107.494	51.6352
78.1824	36.5312
55.0912	30.5408
24.9088	13.44
57.7024	31.4624
82.0224	47.4112
31.744	15.5648
37.4272	20.3776
71.424	43.0336
24.2944	12.9536
145.459	86.7072
34.7392	20.7872
85.6576	40.7552
393.267	64.6144
73.5232	43.1104
43.5712	25.344
262.989	131.302
29.4144	15.7184
68.9152	37.5296
62.6176	36.2752
43.2896	24.6784
42.9056	24.9344
100.096	60.0576
30.464	16.3072
26.2912	14.3104
44.4928	25.6768
35.4816	20.992
69.2992	39.8592
70.1952	35.6096
43.2128	25.1904
59.8272	32.4352
84.224	47.7184
46.7712	27.0336
42.7264	23.68
476.902	114.381
45.1584	26.24
31.8208	16.8704
35.7376	20.096
63.7696	36.8896
35.84	20.3264
41.6768	21.7088
33.3056	18.7392
727.706	100.659
81.5104	47.9232
36.8384	21.4016
72.704	32.8448
147.302	65.9456
28.544	15.0016
94.8736	54.1952
51.328	30.6944
70.2464	37.8368
44.7744	26.6752
182.118	84.0192
33.28	19.1744
48.9728	26.624
635.878	58.6752
99.0208	54.9632
50.7136	30.2848
80.384	46.848
55.2704	30.0544
43.6992	25.7792
54.144	32.6144
158.054	87.2448
46.9248	24.6528
44.2368	23.9616
44.9792	25.728
23.7568	12.6464
57.4976	32.7168
65.3568	38.7328
663.04	127.667
35.1744	21.2992
24.7808	14.1056
295.424	80.1792
589.978	122.778
37.3504	22.6304
44.672	25.1392
25.2928	13.4912
210.176	69.4016
48.1792	26.3936
46.208	24.8576
441.062	68.992
757.197	138.496
25.9072	13.568
45.8752	24.4992
117.862	64.1536
37.0432	21.3504
33.8432	20.3008
28.3136	15.4624
80.4864	37.12
197.376	99.7632
35.0464	19.2512
125.824	63.232
76.6208	38.2208
128.64	65.9968
185.37	107.162
37.5296	21.504
27.392	14.8224
114.406	56.8064
26.8544	13.3632
34.2272	17.0496
43.5456	26.24
73.344	43.9296
28.032	13.0816
50.6368	26.624
62.4128	36.6848
114.534	46.208
44.288	24.4736
68.5056	39.0656
94.7456	54.8352
45.1072	26.1376
137.37	68.0448
56.064	33.1776
163.866	84.5568
53.632	31.1808
53.1712	26.5728
34.7392	19.2256
105.165	52.5312
45.0816	26.0096
41.4208	25.9328
54.8096	32.0512
65.1008	36.7616
49.5616	23.0656
39.1168	21.6064
108.493	64.6912
55.0144	30.9504
79.5392	45.824
39.6544	19.9936
24.4224	12.2624
24.6016	13.952
33.8432	18.5856
101.888	57.5744
81.9968	49.3056
81.7152	44.2368
42.3424	25.3952
24.192	12.544
37.4272	20.5568
33.1776	19.712
98.816	48.5888
282.189	48.2816
26.0096	14.848
24.6016	12.7232
40.9088	23.0656
27.392	16.4096
47.616	26.8288
27.1872	15.5136
74.9056	36.3264
186.163	101.12
52.7104	28.9024
35.2512	19.9424
34.944	20.48
62.2592	36.224
149.043	72.2688
97.1008	47.0528
15.6416	7.808
44.8	26.2912
89.7792	51.7888
39.6032	20.1984
60.4928	29.184
50.9184	28.288
15.9232	8.7296
81.5872	37.888
37.4784	20.6336
53.9904	31.104
27.0848	15.1552
43.5968	26.5472
49.152	29.44
60.8	36.096
25.6768	14.2592
79.9232	50.048
33.28	16.3072
378.368	69.248
28.4928	16.4608
63.4624	36.352
47.4368	29.0048
119.475	59.1616
33.024	19.9936
33.9456	20.7872
37.1456	21.3504
108.16	45.4656
33.664	18.432
72.3456	43.0848
65.0752	33.1008
49.5104	26.3168
37.0176	21.9392
73.9072	45.0816
99.584	57.9584
37.7088	19.1232
34.2784	17.2544
133.35	67.6352
32.4096	16.9472
26.2144	9.3696
37.3504	21.4528
78.848	51.6864
60.544	37.376
38.016	22.8864
27.9552	14.1824
29.1584	19.8144
75.776	39.6288
58.8544	35.6096
40.2688	17.3568
101.53	49.152
32.7424	18.0224
80.4096	38.7584
43.52	22.6304
48.512	28.3392
42.4448	24.2688
33.3824	18.2272
148.608	68.4288
55.6288	29.2352
31.8976	18.7136
31.3088	18.8416
147.021	84.5568
45.824	25.984
40.8832	25.1648
70.656	29.2864
106.726	64.7936
134.118	70.528
43.7248	26.8032
22.3744	11.4688
57.7024	28.8512
24.3712	13.5936
82.2016	47.4112
115.738	65.4336
38.0416	21.2224
40.8832	20.0192
99.3536	56.576
63.8976	36.5568
33.4848	20.608
107.238	51.6352
140.058	74.8032
33.3312	20.1216
13.568	6.8096
24.5248	13.696
36.352	21.4016
25.1392	14.3104
50.2784	27.5712
40.4736	21.632
35.9936	21.0176
122.982	52.992
71.808	44.8512
22.9632	12.7744
61.6192	31.0784
119.552	61.184
68.5056	40.3456
25.5488	13.184
32.4608	18.7136
72.9344	45.1072
45.4656	23.168
34.2784	20.3008
24.832	12.288
71.6544	36.224
127.155	70.2976
48.2048	28.6464
52.6592	32.64
56.8576	32.1536
55.1424	28.288
87.4752	56.2688
108.109	65.3056
39.8592	24.7552
24.6016	13.3888
22.4768	12.9024
44.4928	24.4224
14.2592	7.3216
141.286	81.408
40.5248	24.2688
68.608	41.3696
48.1024	28.2624
31.5904	18.4832
32.64	18.6368
31.2832	16.3328
86.7328	47.6928
237.44	36.6592
48.3584	28.16
84.4544	37.7344
55.296	33.28
25.1904	13.44
33.2032	19.1232
66.5856	40.832
32.512	18.3296
33.5872	20.4288
43.5712	24.5248
22.7584	11.9552
41.6	26.8032
22.5024	12.6464
29.824	19.0208
22.2464	14.6432
19.1232	11.2896
10.5216	4.48
7.0656	1.3824
117.427	52.9152
22.784	13.184
10.9824	3.968
11.5968	5.8368
26.4448	15.7952
20.0448	11.0848
176.41	25.2672
26.88	15.6928
6.7072	2.2784
55.7056	31.3344
48.9216	30.0032
31.1552	17.92
23.296	10.7264
19.1488	8.9344
32.6144	20.608
89.7536	38.4768
153.139	80.896
25.0112	14.1824
40.4736	22.784
39.0912	22.9376
56.2176	28.032
22.0416	12.3136
38.0416	23.3728
53.6576	33.024
29.9776	13.7216
33.92	17.4336
44.8	23.552
26.1632	14.5664
41.4464	25.3952
98.2528	50.5088
62.1824	28.288
45.44	25.7792
45.312	27.5456
34.8928	20.096
140.39	76.1344
53.4784	24.9344
60.8768	29.1072
55.9872	30.7968
33.4592	20.5056
25.728	14.976
27.0336	12.9024
32.6656	19.968
44.4416	27.4432
39.8336	23.0912
84.1728	51.7376
45.2352	27.3664
83.9168	45.2608
42.752	22.9376
62.1568	35.1488
24.704	12.928
53.9136	31.8208
38.8864	25.4464
8.8064	3.8912
36.2752	20.3264
67.0976	40.0896
57.6	36.5568
33.7152	20.5568
12.9024	7.1168
91.136	50.0224
66.7648	41.8304
22.2464	11.1616
312.064	66.816
52.0192	29.2864
66.304	37.9136
57.7024	29.3888
41.984	26.1888
64.4096	38.8096
192.589	107.75
51.3024	28.2624
92.544	43.008
54.4512	28.7488
25.9072	12.7232
38.5024	23.9616
44.0832	27.52
24.2176	13.0048
45.2352	27.4944
31.36	19.7376
23.552	13.2096
65.5872	40.064
24.3712	11.4944
322.867	60.544
53.6064	33.6128
29.7728	15.2576
143.309	77.2096
26.6752	14.4896
28.2368	16.5376
68.2752	42.624
52.352	33.0496
31.5136	20.5824
72.064	41.4976
24.6016	13.7728
64.8704	40.6016
65.6896	38.3744
35.1232	19.6864
27.5456	14.1824
22.8608	13.4144
32.6656	20.4544
28.4928	15.1296
41.3696	27.3664
33.664	20.0192
44.9536	26.1376
48.0768	31.2832
120.755	67.2512
13.7216	7.3728
83.2256	50.3552
1082.55	62.2336
51.4048	32.5376
610.714	55.2448
68.2496	36.5824
44.4928	28.1344
70.2464	41.1136
25.4464	14.592
332.416	31.2832
96.6912	49.9968
28.6208	15.616
67.2512	41.7536
74.9568	37.5552
101.299	52.224
39.5264	21.7088
75.264	48.9216
63.872	31.36
73.1648	41.2928
31.7696	16.8192
879.027	172.672
79.9232	48.128
42.752	26.9056
26.5728	13.44
711.629	64.0512
80.8192	44.6208
62.2848	29.5168
39.7056	24.0896
133.709	74.9312
726.554	97.4848
2165.22	91.904
53.504	33.4592
46.8736	25.8304
47.7696	29.2096
63.9232	35.2512
59.3664	35.9168
59.5456	28.7744
409.498	39.552
36.992	20.3008
31.488	15.872
29.5936	15.4112
80.7168	40.7296
52.096	25.3952
48.8448	23.7056
87.3728	51.8144
38.2976	20.1728
121.216	59.8528
35.0208	15.5648
17.1264	7.9616
24.96	12.5184
32.896	17.0752
23.1424	11.5968
38.0928	18.6368
18.1248	7.808
20.608	9.344
26.1376	13.2096
58.3936	32.9984
24.8576	12.672
1587.15	93.6704
37.7088	19.2512
23.6544	11.8784
31.9488	15.4368
10.9568	4.3776
25.8304	13.2864
68.3008	39.5008
72.3456	34.1248
58.496	34.1504
50.304	24.32
48.8448	27.4176
44.672	23.168
40.9088	22.7584
34.2784	19.2512
91.5968	47.0528
32.5376	15.6416
45.44	26.6752
49.2544	29.0304
51.4816	23.4752
850.406	94.8992
71.1936	43.0336
40.5504	20.864
61.6704	34.9184
38.6816	20.48
42.0096	23.7568
91.4432	52.6592
398.515	92.8512
156.186	45.2352
45.3632	25.8304
101.222	55.0912
26.112	14.2336
24.0128	11.8784
30.6176	14.6944
64.5888	31.7184
29.9776	14.6176
10.3168	3.1744
221.491	34.9184
35.6864	20.4544
23.0912	11.52
13.7216	5.9648
79.5136	41.6256
33.1264	18.2528
68.1984	40.1664
42.4704	24.2176
46.8224	28.5184
60.2112	34.2272
106.342	50.2784
61.5168	39.424
31.9744	17.0752
49.7152	23.5264
32.8448	16.4864
33.4336	19.0464
32.9216	18.8928
36.3008	20.5568
148.506	75.52
14.1568	7.168
39.68	21.4016
426.982	54.4768
119.578	64.0256
24.6272	9.8304
118.963	61.2352
31.5136	18.8672
76.3648	45.1584
41.3952	24.2688
45.7472	23.3984
31.6928	17.0752
23.6544	12.0832
21.5552	13.3888
93.7984	42.8032
55.808	33.6896
48.3328	25.856
242.765	24.32
48.9216	26.8544
1371.98	126.746
219.904	34.3552
651.93	93.8496
228.634	51.5072
183.424	88.9088
34.0224	15.8464
664.883	47.7952
45.5936	26.8544
48.1536	30.1824
76.544	44.6976
810.726	39.1936
83.6096	40.576
137.011	62.6688
237.926	33.5616
101.018	55.5776
32.768	18.7392
12.544	6.4
4483.48	145.92
40.4992	21.7856
10.2144	5.1968
53.9392	32.1536
43.8784	24.4224
10.9824	4.4288
34.5344	17.6896
34.7136	21.4016
33.024	18.4576
49.0496	25.8816
41.6512	25.7792
68.5056	39.808
24.7296	14.0032
15.6416	7.424
200.474	88.2688
43.5712	25.1648
376.269	73.6
31.616	16.9984
41.4208	24.4992
2026.44	68.5824
20.1984	10.2144
1519	52.3008
1435.44	89.4208
46.9248	24.6784
36.5056	19.6096
510.387	33.024
33.92	16.128
47.8464	24.32
36.4544	20.5568
687.693	23.1424
21.888	11.2384
19.7888	10.5728
36.5824	19.84
43.1104	23.2192
56.2176	28.9792
30.6688	19.3536
128.23	69.4016
33.92	18.2528
33.4336	17.6896
79.6928	41.2672
55.3728	28.9024
90.3168	56.3712
53.5296	32.0768
39.9616	22.272
22.7584	11.3664
33.3056	18.7648
30.6688	16.6656
38.2208	19.5584
7707.01	242.048
58.3424	35.4304
33.6128	19.5072
20.8128	10.5728
24.9344	13.0816
35.3536	18.8672
219.827	46.4128
82.3296	39.0912
703.514	39.1936
25.1904	13.2864
1031.94	77.4656
50.1248	26.3936
44.288	23.7824
3828.94	57.8304
29.1584	14.4128
25.5744	13.6448
89.7792	59.3152
32.4096	19.2
33.536	18.0992
22.6304	11.4176
25.9584	12.8256
4451.25	70.6048
1165.47	39.7056
46.4896	26.0864
39.9872	18.7392
13.824	6.3488
32.6656	16
79.0528	46.9504
22.0928	10.1888
4667.7	101.222
28.7488	13.5424
28.1088	14.464
47.744	28.7488
26.368	13.0816
54.0928	21.8368
40.8576	21.9648
17.8176	6.2976
42.7008	20.992
71.7568	38.9376
1065.27	83.0464
55.1168	31.0528
224.563	148.07
29.8496	15.1808
35.0464	17.2544
27.1872	14.0544
29.0304	15.0784
444.006	33.024
37.2224	21.1456
1911.19	80.4352
1003.44	9.344
27.5712	14.4128
33.664	18.6112
39.808	21.248
45.2352	23.8336
953.088	105.088
30.2336	14.2336
21.5552	10.496
3127.04	117.018
28.6208	14.976
23.808	11.6736
315.904	44.2112
102.298	51.8912
20.7872	10.1632
69.632	46.5152
18.1248	8.2432
1163.57	23.552
78.0544	33.4336
52.8384	29.0048
34.1248	17.3824
13.7472	6.4768
37.2224	19.6096
37.12	17.8432
53.0176	29.0816
22.5024	10.9824
28.288	13.3632
71.3216	25.8304
38.6816	19.7888
31.3344	16.384
50.0736	26.9824
61.44	30.9248
36.864	19.6864
22.144	10.8544
51.3536	26.3424
30.1568	16.128
369.51	10.1888
46.0032	24.8832
71.8592	40.704
50.9952	25.088
27.0336	13.5936
1597.11	72.9088
2608	81.024
33.1264	18.2528
269.261	16.128
42.88	20.6848
74.0864	42.2912
22.016	10.7264
19.84	9.856
22.5024	10.88
229.581	48.8192
40.0128	21.7856
32.0512	17.5616
35.456	20.9408
31.3088	16.128
32.9472	17.5616
30.1312	15.6928
29.4656	15.5392
670.925	39.9872
31.616	17.4592
409.856	46.4384
436.454	42.0864
22.2464	11.136
561.357	61.9776
20.7872	10.2912
4181.58	101.248
35.6608	19.2768
121.83	27.392
218.368	44.6464
2008.76	122.598
30.8736	16.3072
39.8336	19.2512
45.6192	25.9584
23.552	12.2368
79.6416	41.1904
677.939	31.5136
30.2848	16.384
20.1728	10.2656
615.962	21.3248
34.7136	18.9696
43.4944	24.8064
30.976	16.9472
35.712	21.1968
55.296	25.1904
46.0032	23.9616
31.3344	15.488
984.371	72.4992
41.4976	23.2448
70.4	38.7584
1516.13	111.821
618.112	54.6304
22.5024	11.1104
470.758	40.6272
23.3472	11.9296
50.432	28.672
29.9264	14.7712
21.4784	10.9568
1615.31	113.28
48.9984	29.7984
226.099	8.7296
22.528	11.2128
13.3376	6.912
31.36	17.3824
22.9888	11.6224
30.336	16.256
40.576	22.7584
29.0048	15.616
29.9008	16.6656
32.6656	16.1536
23.1168	11.8272
42.0352	22.016
26.3424	12.3648
29.6448	17.0496
282.086	32.64
38.3744	12.7488
122.982	26.4704
520.653	93.0816
35.456	15.3344
663.552	54.6048
82.5344	38.272
3096.52	16.2304
206.976	25.7536
26.7008	13.4912
24.3712	11.1872
39.2192	20.1728
37.6576	8.9344
36.9152	18.9696
26.4704	12.4416
43.52	22.5024
44.5952	23.1936
24.1408	11.1616
498.995	72.1408
37.2224	19.8656
15.2832	6.912
2489.06	112.896
472.909	34.9184
20.736	9.8048
67.7888	40.5248
424.448	22.5792
139.418	34.8416
5889	67.8912
17.4336	8.6272
62.0288	33.2544
24.2432	12.1856
220.979	24.448
281.702	31.5648
46.7968	25.856
41.7792	22.144
76.416	30.5152
27.7504	14.72
695.168	43.264
30.2336	16.0768
35.328	17.0496
31.2832	16.8448
1271.65	42.8288
41.4464	21.9648
56.9344	28.5696
16.9728	8.1408
22.1184	11.3152
33.92	18.1504
46.2592	25.8048
17.3312	8.8064
9.3184	4.6848
32.4864	16.8192
92.5696	48.9472
458.24	29.6192
30.8224	13.0304
33.92	18.4832
40.7552	24.1408
1111.07	17.6896
49.8688	27.0336
31.4368	16.4864
27.904	15.2576
308.147	45.7216
23.9872	12.16
31.8976	17.1008
480.589	48.5888
26.3424	14.208
9.8304	4.736
1127.19	36.8384
25.1648	13.7216
352.384	41.728
27.2896	14.5664
226.099	22.9376
4259.05	44.7232
1372.52	86.0416
2987.03	114.253
12.8256	6.5536
26.5984	13.1584
22.3744	11.3408
22.6048	12.16
28.6976	12.0832
33.28	16.8192
35.5584	18.9952
16.2304	8.4224
349.952	30.7712
22.8096	11.5712
50.6112	19.712
507.238	37.5808
314.726	17.1776
36.5312	20.1472
19.6608	10.2912
36.1984	20.4544
12.5696	5.1968
39.3472	21.7088
46.9248	25.7536
18.56	9.6768
767.846	8.96
397.107	21.3248
29.6704	15.0272
682.419	21.888
16.896	8.8832
34.5856	18.5088
47.3856	25.7536
171.264	22.5536
20.3776	10.1888
128.358	12.544
33.408	18.944
5.888	2.5344
3008.64	36.4288
366.285	5.632
1157.04	35.8656
505.088	15.2832
137.856	8.7296
84.1728	6.1952
32.6144	17.9456
38.1696	21.5808
28.3136	15.36
27.8784	13.8496
10.752	5.4528
10.3424	5.4272
367.923	28.9536
45.312	23.808
19.9936	10.2656
42.6496	22.9888
107.494	15.9744
42.3936	23.4752
1205.89	33.9712
117.427	14.336
32.5376	17.536
1599.74	40.192
34.5344	17.6128
49.9968	26.8288
1997.93	47.4368
25.8048	13.1072
28.2368	14.2848
28.288	15.5648
3225.27	110.925
25.7792	12.9792
19.1232	9.8304
126.95	74.1376
20.7872	11.4944
259.046	18.2016
68.2752	37.3248
10.2912	5.1712
21.2224	10.9056
21.888	11.2128
4293.02	67.968
2381.47	123.366
29.8752	16.0512
38.3488	20.608
10721.5	188.928
42.1632	22.3232
24.1408	12.6464
21.1456	10.112
26.4448	12.2112
21.0432	10.0352
25.8304	11.264
28.6208	13.3376
53.76	28.8
395.571	15.4624
12.4416	0
19.1488	8.6528
48.128	27.5456
49.5104	27.7248
10.3168	4.8896
29.1072	15.4624
226.099	13.312
717.67	40.96
366.618	12.0064
93.2864	51.8144
608.845	65.3312
118.579	20.9408
410.957	2.56
19.84	9.8304
30.4128	3.3024
4746.96	18.6112
62.6944	29.9008
17.1264	8.3712
11.136	4.608
39.7056	19.6608
256.819	19.84
226.099	14.976
635.187	35.0208
424.781	31.8976
327.731	12.5184
717.747	44.3648
8847.16	98.4576
14.1056	6.912
24.2944	12.7232
19.2512	9.6512
29.44	13.9264
19.0976	8.9088
16.6912	8.448
36.608	20.5824
28.2112	12.9024
23.6288	10.7008
17.6384	8.8576
22.1952	10.752
39.7312	19.968
32.1536	16.2816
20.0192	10.368
1549.75	36.9152
226.099	23.1936
27.1616	14.208
8.8064	4.4288
18.9184	9.4208
11.1104	5.7856
43.264	23.7824
12.1344	6.3232
12.7488	5.2224
17.8432	9.1648
20.3008	10.3936
1935.16	2.8928
1981.21	33.1776
6896.23	101.632
160.922	9.1392
19.0976	9.7792
25.9328	14.3104
1205.96	54.0416
354.33	24.5504
650.803	34.816
27.7504	14.8992
21.8624	10.7776
38.7584	19.712
63.1552	37.8624
26.6496	15.3344
25.1904	13.1072
44.288	25.4464
427.827	20.7872
9.216	4.7872
31.5136	17.4592
24.7552	12.416
21.1456	11.264
9.5232	4.864
26.624	14.6176
23.0144	12.416
26.2656	14.3616
508.493	26.112
26.496	14.336
18.2016	9.3184
35.6096	15.36
15.4368	8.5504
74.1632	44.0576
19.9168	10.2144
8594.48	117.402
7.3472	3.3792
539.622	29.4912
17.6896	8.704
252.544	23.6544
23.424	12.5696
21.7088	11.0848
230.963	21.9392
8.32	3.4048
39.3472	21.6576
13.8496	4.3776
2877.88	65.4336
229.862	24.4992
16.9984	8.832
39.8592	21.504
30.3616	16.3328
29.9008	16.7168
378.24	12.6976
307.021	21.2224
23.9616	13.4656
27.52	15.232
18.048	9.2672
26.3424	14.8736
14.2848	7.2704
18.6624	9.9328
19.4048	9.8304
51.8144	26.8032
40.0896	22.144
395.776	19.712
46.08	22.5024
26.0608	13.9776
5805.75	104.781
17.8944	8.704
34.5856	18.3552
17.2032	9.1392
2467.4	94.7712
22.7328	11.008
228.429	28.6976
17.5616	8.192
17.408	8.192
15.5648	8.0384
25.9328	14.3872
18.688	9.7536
21.9904	10.9568
17.9968	9.5488
30.8224	16.64
18.1248	9.1136
11.6224	5.7344
18.1504	8.4992
226.099	15.5392
10.4448	5.1712
1838.64	28.7488
26.368	13.8752
41.1648	5.9392
33.3568	16.7168
10.5984	4.3008
23.4752	11.648
20.6336	9.984
434.304	12.8768
26.5216	13.7472
18.2784	9.1904
10.7776	1.5872
27.0592	13.8496
30.0288	16.2304
25.7792	12.0832
231.782	15.8464
1268.71	20.7616
25.8048	7.2704
46.3616	24.8832
382.336	17.4592
21.7856	10.624
28.6208	14.72
15.2576	7.0656
35.328	17.6896
226.099	17.5872
9183.85	175.36
17.9712	9.3696
21.9392	11.9296
766.182	1.8688
36.352	19.5584
11.8784	5.4272
14.4128	7.3216
25.6	13.9008
21.1456	10.4192
340.582	24.3456
57.7792	22.2976
46.6688	22.7072
31.3088	15.9488
16.4608	8.5248
850.381	19.5328
19.584	9.4976
34.1504	20.5312
612.326	5.9136
17.3312	4.8128
32.768	16.3584
13.7472	6.0416
22.7584	10.9824
7.68	3.6352
445.568	10.0096
29.9264	15.3344
18.0224	9.5744
8.2688	4.6336
22.528	12.6208
26.88	13.4912
890.24	49.1008
309.581	24.576
47.104	23.3728
316.288	17.4336
15.5392	7.5776
7.2192	3.6096
17.7664	9.1904
35.84	18.1504
32.6656	18.5856
312.474	13.7472
10.0608	5.3504
21.2992	10.6752
394.854	3.456
226.611	42.0608
10.0864	5.2736
1874.69	52.4032
451.686	25.8304
42.6496	24.4992
20.6592	10.0608
18.4576	10.6752
40.2432	21.3504
460.365	19.6352
16.384	8.8576
9.2928	4.9152
3395.58	21.9648
28.7232	16.896
51.6352	31.36
45.6192	22.6048
47.4624	26.9568
17.6896	9.4464
24.6016	14.208
37.6064	22.2464
29.3632	12.1856
19.2512	10.1888
9.7024	5.2224
280.141	13.2864
13.7984	7.296
13.6192	6.912
3731.84	88.9088
23.168	13.0816
33.664	18.3296
7.7568	4.1984
8.0128	4.0192
13.4144	7.424
9.1648	4.7872
6.9888	4.1728
9.1648	3.6864
14.7968	8.2432
12.7488	5.7088
15.4368	8.064
1053.34	29.3888
16.9216	9.3184
4.8896	0
15.4368	8.2432
1705.93	46.592
54.2976	29.3632
5.0432	0.4096
5.8624	0.4096
5.12	0.0256
25.7024	4.352
7.68	4.352
7.4496	4.352
8.7808	4.9408
10.752	5.6576
14.592	7.7824
12.544	5.76
30.6432	15.9488
358.733	20.4544
30.0032	16.0768
25.2672	13.696
7885.82	117.862
518.656	12.544
8.0896	4.5056
226.099	3.5072
6.2208	3.1488
30.2336	10.9568
35.6864	19.456
23.6544	12.1856
5.8112	2.1504
9.344	4.224
47.1296	25.6512
11.1616	2.2784
18.9952	9.2672
599.501	11.904
29.4912	15.6416
1271.01	18.0224
16.7936	9.1648
30.336	15.232
2.8928	0
24.32	13.7728
8.1664	4.5056
8.2432	4.1984
12.8256	2.9952
28.8768	0
76.8	17.4336
36.7104	19.3024
27.6992	14.976
15.5136	2.2784
6.528	0
9.216	0.3072
6.7584	3.4816
10.88	1.5872
31.8976	18.1248
14.336	7.7568
29.1072	0
1087.05	37.8368
24.064	12.2624
4.8128	0
9.088	3.2256
9.088	5.0176
35.6864	11.4432
13.4656	7.168
29.696	14.9504
12.5696	6.3232
110.438	56.2688
22.656	11.1104
11.0592	5.6832
23.9872	13.3888
8.9344	4.8384
1375.67	28.2112
10.0864	0
6.3232	0.5376
12.9024	6.784
17.8944	2.9952
619.597	31.0272
22.6048	11.008
16.6912	0
36.352	4.7104
4.9408	0
17.7152	9.088
28.5696	14.3872
5.1968	0
9.5488	4.0448
49.3056	22.4
15.36	0
35.0976	17.1776
4.096	0
9.856	5.1456
19.2256	0
8.0384	4.2496
6.0928	0
5.376	0
24.0384	12.6464
8.8832	4.5824
7.6032	3.7632
31.8464	18.2272
3.712	0
21.0688	10.752
9.5488	4.9664
18.8672	9.344
153.216	26.6496
28.416	14.8224
677.427	25.1136
9.5744	0
10.8032	5.4272
29.312	16.5888
9.9584	5.376
18.5088	0
8.704	4.48
4014.95	66.7648
867.149	4.4544
19.5072	1.28
26.9824	14.1568
15.8464	8.1664
11.2896	0
25.2672	0
9.9072	0
17.1264	8.7296
9.344	4.864
7.808	0
8.6016	4.5824
5.6832	0
7.2192	0
18.1504	9.1136
17.8688	4.7872
8.8064	4.5824
2708.61	41.9072
13.2608	0
133.325	41.4976
6.2208	3.3792
22.8096	12.5184
137.37	6.4768
5.9904	3.1232
15.5648	8.192
6.272	3.328
789.837	48.6912
15.744	2.4832
5.0432	0
18.688	9.9072
4.7616	0
17.8432	1.1008
24.4736	10.2912
6.4	3.7632
187.315	92.3648
14.5408	7.3216
18.0224	7.1424
6.016	1.0752
45.2864	27.7248
29.6192	15.5136
12.0576	1.3824
5.888	0
6.8096	3.5328
72.8064	22.8864
1444.99	30.208
79.2064	17.92
8.064	0
11.8272	5.7344
18.7904	9.8816
4887.35	103.45
508.314	14.2592
233.574	23.5008
11.6224	6.0928
5.8112	2.5856
6.784	3.9424
9.9328	5.4272
18.9696	10.1632
8.96	0
4.7616	0
1052.36	22.5024
23.3216	12.4416
9.6	5.2224
19.9424	10.4448
32.5376	4.1216
508.826	16.3072
41.1648	15.6416
19.328	10.8288
4.48	0
10.8032	0.8448
5.9136	1.5872
136.474	32.128
20.0704	10.9312
68.1984	2.7136
17.152	9.0624
9.216	4.7104
18.2784	10.9568
19.84	10.5216
13.7216	7.7824
13.9264	8.1152
226.099	8.576
14.3104	8.1664
10.0096	0
29.4144	15.5648
15.488	8.4736
19.6096	8.192
20.0448	2.944
8.3968	4.5056
16.5888	8.6016
1293.21	18.9952
16.3328	8.8576
23.7568	13.7984
468.941	193.613
22.2464	12.928
12.3136	6.1952
19.3536	9.3952
15.3088	8.6016
5.3248	0.5632
17.6896	9.2928
11.6992	6.2208
210.15	59.8272
17.2544	10.112
25.2672	11.264
10.752	5.6576
14.08	7.3472
20.3776	11.2128
29.4144	14.8736
5.8368	1.3056
8.32	3.9936
11.2896	5.76
24.064	0
6.2976	2.2784
30.7712	0
13.2864	6.7328
15.872	8.7552
15.1808	3.4048
5.504	1.0752
13.5936	7.4752
17.0496	2.8928
8.8064	4.4288
29.312	12.8256
3.8656	0.4608
49.6128	31.0528
28.1088	15.232
[truncated: 4,690 more rows]
