# Supplementary material for: Bacterial survival in microscopic surface wetness
Source: eLife. 2019 Oct 15;8:e48508. doi: 10.7554/eLife.48508 (PMC6824842; doi:10.7554/eLife.48508)
Supplement: Figure 3—figure supplement 2—source data 1. — Raw data: Aggregate area (in μm2) vs survival rate for P. fluorescens, P. putida. [file elife-48508-fig3-figsupp2-data1.xlsx]

## Sheet: Figure 3 - Supplement 2
log10(min aggregate area [um^2])	0	0.75	1.25	1.75	2.25
log10(max aggregate area [um^2])	0.75	1.25	1.75	2.25	inf
p. fluorescens
survival rate	0.0567312	0.0167703	0.028006	0.0735373	0.125709
standard error	0.00182424	0.00110214	0.00338017	0.0098644	0.0191649
p. putida
survival rate	0.105887	0.0757319	0.166925	0.390704	0.623583
standard error	0.00218692	0.00197154	0.00706954	0.0204798	0.0276579

## Sheet: Fig 3 Supp 2 raw p fluorescens
aggregate_area	survival rate
0.0768	1
0.9472	0
2.3808	0
5.5808	0
0.256	0
1.28	0
3.2768	0
0.2048	0
37.7088	0
1.3312	0
103.066	0
2.2272	0
10.4704	0
16.5632	0
6.6304	0
1.9712	0
26.5984	0
10.88	0.335958
13.7216	0
16.6656	0
7.936	0
5.9136	0
9.7536	0
8.192	0
4.0704	0
9.4208	0
5.7088	0
4.096	0
5.7088	0
4.5312	0
4.608	0
1.792	0
2.944	0
4.7104	0
18.7392	0
6.7328	0
5.76	0
2.9184	0
1.536	0
2.1248	0
5.2992	0
4.5312	0
4.7616	0
3.8144	0
15.4368	0
4.2496	0
2.9696	0
1.9456	1
1.9712	0
15.7696	0
5.2224	0
3.2512	0
3.9424	0
4.1216	0
5.0688	0
5.0944	0
0.9216	0
7.3216	0
14.6176	0
5.632	0
5.5296	0
3.6096	0
8.0128	0
14.9504	0
1.4592	0
5.4016	0
17.3312	0
3.4304	0
3.3792	0
2.8416	0
8.7808	0
8.1664	0
2.6368	0
6.7072	0
3.2	0
4.9408	0
7.68	0
6.016	0
0.4864	0
4.7872	0
7.3984	0
5.248	0
2.3552	0
4.8128	0.153846
4.48	0
12.5696	0
5.5808	0
4.3008	0
5.2224	0
7.68	0
3.7888	0
1.1264	0
9.9328	0
6.4512	0
6.528	0
2.7648	0
2.816	0
6.7584	0
4.6848	0
2.7136	0
2.5344	0
5.9648	0
3.2256	0
2.7136	0
10.9056	0
6.3744	0
4.736	0
3.9424	0
5.1968	0
3.5328	0
29.056	0
5.248	0
7.8336	0
3.0464	0
8.1152	0
4.2752	0
3.6864	0
7.8848	0
47.3088	0
8.4736	0
4.992	0
1.1776	0
12.6464	0
3.6864	0
4.736	0
7.9616	0
0.2048	0
7.5008	0
20.8384	0
2.3296	0
5.76	0
5.8112	0
2.7392	0
2.7648	0
14.0544	0
1.4592	0
4.7872	0
4.352	0
99.8656	0
3.1488	0
0.0768	0
16.1792	0
426.957	0
9.6	0
6.0672	0
2.0224	0
6.016	0
2.2784	0
0.0768	0
4.1984	0
0.5376	0
5.8112	0
11.8784	0
3.456	0
8.3712	0
35.7888	0
3.3024	0
2.7136	0
2.3808	0
5.248	0
4.9664	0
3.1744	0
5.9136	0
8.8064	0
4.2496	0
5.7344	0
4.4544	0
19.2512	0
6.6304	0
19.584	0
14.2336	0
0.256	0
2.8928	0
5.9136	0
16.3584	0
6.4	0
135.782	0
10.3424	0
5.3504	0
3.6608	0
9.6	0
1.2544	0
10.496	0
1.3824	0
1.0752	0
2.304	0
29.2096	0
9.5744	0
9.5488	0
5.6576	0
7.68	0
0.0768	0
3.5328	0
13.8496	0
1.1776	0
9.344	0
5.1456	0
6.528	0
4.352	0
5.4016	0
8.6784	0
3.2	0
1.8944	0
11.2384	0
2.3552	0
15.2576	0
11.2384	0
0.9728	0
5.4528	0
2.5088	0
5.7088	0
2.3296	0
6.528	0
5.7344	0
4.8896	0
2.8928	0
236.851	0
5.0688	0
1.0496	0
2.944	0
5.0944	0
2.4832	0
6.7328	0
5.6064	0
1.3824	0
6.3232	0
6.0672	0
6.016	0
1.5616	0
6.1184	0
13.6448	0
4.4544	0
1.9456	0
13.0304	0
5.3504	0
6.1184	0
9.0368	0
4.8128	0
10.4448	0
2.8672	0
9.7792	0
3.6864	0
1.9968	0
4.352	0
1.7408	0
2.6368	0
0.1024	0
30.9248	0
5.9648	0
0.128	0
16.7168	0
7.936	0
13.2864	0
0.896	0
7.9616	0
30.8224	0
4.224	0
3.0208	0
163.507	0
3.0464	0
0.7168	0
7.0656	0
3.2768	0
6.9888	0
2.7392	0
5.7856	0
6.8608	0
4.608	0
7.168	0
1.2544	0
11.9296	0
2.4576	0
4.7616	0
0.0512	0
4.6336	0
6.4768	0
14.1824	0
1.8944	0
26.6496	0
1.8688	0
2.4832	0
0.4608	0
17.6128	0
0.256	0
1.536	0
7.0912	0
7.3216	0
6.1696	0
6.0672	0
0.2048	0
0.6912	0
4.0704	0
1.408	0
0.0768	0
1.4848	0
4.5568	0
2.9952	0
1.3056	0
25.5232	0
3.9424	0
8.3712	0
7.9872	0
0.9472	0
2.9952	0
4.224	0
1.8944	0
2.8416	0
1.152	0
9.7536	0
3.3024	0
1.28	0
4.0704	0
5.7856	0
18.1504	0
0.9472	0
3.8912	0
59.392	0
0.3328	0
13.3376	0
6.0928	0
3.072	0
89.7024	0
15.5392	0
4.4032	0
7.8592	0
6.1952	0
7.4496	0
0.1536	0
8.7296	0
5.0176	0
4.6592	0
23.7312	0
2.6368	0
3.5584	0
78.4384	0
1.28	0
31.36	0
4.4032	0
0.768	0
2.9696	0
3.84	0
8.192	0
2.56	0
4.5568	0
2.6368	0
6.0672	0
5.0688	0
4.48	0
17.792	0
4.352	0
3.3792	0
14.0032	0
4.224	0
2.2528	0
61.5168	0
10.2656	0
149.606	0
5.5808	0
7.9872	0
1.2544	0
5.7088	0
0.3328	0
5.1968	0
8.6272	0
1.3824	0
1.1264	0
2.4576	0
3.7888	0
8.0384	0
14.5664	0
8.192	0
5.4784	0
3.2512	0
7.2704	0
4.9408	0
5.1712	0
8.4992	0
1.9456	0
2.4576	0
7.6032	0
5.8624	0
3.9936	0
36.5312	0
6.2208	0
2.9696	0
3.0208	0
5.8368	0
13.8496	0
4.5312	0
6.2976	0
6.784	0
11.5968	0
6.0672	0
2.4832	0
5.7344	0
1.28	0
5.8112	0
13.7472	0
5.12	0
2.432	0
26.496	0
9.1392	0
1.0752	0
2.7648	0
5.3248	0
18.8672	0
1.9968	0
4.9408	0
1.5104	0
0.1024	1
3.1232	0
1.8432	0
5.6064	0
7.2704	0
2.2784	0
11.2128	0
4.352	0
3.2256	0
1.664	0
5.5296	0
3.0464	0
7.3728	0
103.526	0
6.7328	0
13.6192	0
5.0176	0
12.416	0
20.2752	0
8.6016	0
0.9216	0
14.8224	0
8.448	0
101.581	0.0144124
8.7296	0
6.528	0
3.2	0
4.3264	0
3.4048	0
15.2576	0
10.624	0
6.3744	0
12.3904	0
148.531	0
13.4656	0
5.76	0
4.096	0
34.6368	0
8.2176	0
6.3232	0
7.2704	0
6.6048	0
4.1216	0
11.1872	0
21.4528	0
4.3008	0
4.608	0
11.6224	0
4.6592	0
5.504	0
7.4752	0
14.464	0
11.8272	0
6.1184	0
17.4336	0
8.1152	0
5.1456	0
7.04	0
8.2432	0
4.5824	0
6.9888	0
3.1232	0
4.8896	0.0404624
1.792	0
23.168	0
16.2816	0
8.1664	0
1.408	0
21.2224	0
3.3536	0
2.9184	0
57.9328	0
16.9216	0
9.6512	0
8.704	0
10.4448	0
7.5776	0
4.4544	0
15.744	0
4.1728	0
6.7328	0
6.1184	0
6.016	0
3.9424	0
7.0912	0
5.1456	0
0.1792	0
7.9872	0
4.7104	0
12.416	0
12.544	0
5.2992	0
3.6352	0
4.096	0
267.238	0.000452967
3.4816	0
4.224	0
7.1936	0
1.8944	0
6.3744	0
27.2384	0
7.4752	0
6.0416	0
6.1184	0
0.7936	0
5.8624	0
2.5856	0
30.4384	0
27.008	0
7.0912	0
8.9344	0
7.3216	0
4.9408	0
0.4864	0
8.7552	0
13.8752	0
22.3744	0
71.04	0.0120419
4.9408	0
2.9696	0
5.2736	0
8.7552	0
2.3296	0
1.8944	0
3.1744	0
10.2912	0
5.0176	0
16.8192	0
5.4528	0
6.7584	0
29.1072	0
0.9728	0
2.8672	0
11.8528	0
0.128	0
3.8912	0
7.7824	0
1.9456	0
4.1472	0
3.7376	0
3.2512	0
1.6896	0
8.32	0
7.5008	0
1.7408	0
6.7328	0
3.9936	0
11.1104	0
5.12	0
5.5296	0
17.4848	0
9.472	0
10.9568	0
5.0944	0
7.68	0
3.2768	0
2.9184	0
26.1376	0
9.9328	0.0329341
0.0768	0
19.3536	0
9.2416	0
3.4816	0
7.6544	0
0.5632	0
2.8416	0
3.3792	0
23.9616	0
2.048	0
2.2784	0
1.7408	0
7.5264	0
0.896	0
14.1312	0
5.3248	0
4.4288	0
0.256	0
22.3488	0
2.944	0
30.9504	0
6.3232	0
5.12	0
7.9872	0
8.064	0
4.9152	0
6.2208	0
6.3232	0
16.5632	0
3.584	0
9.344	0
2.048	0
1.8688	0
2.432	0
26.0864	0.0033389
3.6096	0
560.435	0.00228094
36.9664	0
23.7568	0
5.3248	0
9.9328	0
27.6736	0
0.1024	0
2.4064	0
5.0176	0
2.304	0
10.0352	0
11.1616	0
8.1152	0
9.6256	0
0.2048	0
8.6528	0
3.84	0
1.536	0
17.8432	0
0.64	0
4.352	0
136.09	0
0.256	0
3.0208	0
2.688	0
0.1024	0
2.6112	0
8.7552	0
2.3296	0
16.9216	0
10.8544	0
6.0672	0
8.1152	0
6.016	0
6.5536	0
2.7904	0
3.8144	0
2.304	0
4.864	0
1.1008	0
0.1536	0
10.7008	0
8.064	0
11.4944	0
1.3568	1
5.9392	0
14.1824	0
7.6032	0
3.2512	0
9.088	0
2.176	0
0.0768	0
20.2496	0
144.922	0
2.8672	0
6.272	0
0.4608	0
0.4608	1
1.4848	0
3.3024	0
8.9344	0
1.9456	0
3.584	0
3.6864	0
3.6864	0
4.5312	0
5.12	0
2.048	0
2.1504	1
8.192	0
2.56	0
0.0768	1
3.8656	0
9.0368	0.255906
16	0
1.3568	0
6.1696	0
1.536	0
359.04	0.0130244
5.7088	0
1.152	1
1.1776	1
0.5632	1
34.816	1
0.6656	1
0.0768	1
2.0736	0
8.6272	0
4.48	0
2.1504	0
0.5632	1
6.656	0
9.9328	0
0.7168	1
3.8656	0
5.76	0
1.7152	0
0.256	0
0.1792	1
8.7808	0
218.88	0
4.1472	1
5.2224	0
101.914	0
6.1952	0
2.2272	1
1.536	0
5.2992	0
102.605	0
4.5056	0
9.4208	0
158.234	0
0.3072	1
1.6384	0
0.896	0
0.9728	1
1.8176	0
96.5888	0
2.8928	0
1.024	1
11.264	0
1.792	1
5.8368	0
7.4496	0
5.7088	0
9.0112	0
0.5632	1
9.2672	0
4.736	0
1.0752	1
2.9184	0
0.7936	1
0.3584	0
80.1024	0
3.072	0
4.1216	0
1.5104	0
6.2464	0
2.304	0
3.7632	0
5.1968	0
2.176	0
6.2976	0
7.6544	0
0.7168	1
0.896	1
3.3536	0
8.6528	0
5.0688	0
2.9184	0
9.2928	1
3.072	0
12.8512	0
12.6208	0
5.5552	0
3.7888	0
11.648	1
19.456	0
0.128	0
8.1152	0
2.2784	0
15.6416	0
243.994	0
4.5568	0
1.7664	0
0.1536	0
10.5472	0
3.6608	0
0.7424	0
9.728	0
2.816	0
0.0512	0
18.3552	0
36.224	0
0.1024	1
4.352	0
3.9168	0
0.6912	1
146.688	0.0510563
0.384	0
16	0
0.1024	0
9.2672	0
9.1136	0
8.7296	0
13.1584	0
5.7856	0
2.8672	0
35.1744	0
0.2304	1
8.2432	0
8.2176	0
7.6288	0
4.5312	0
5.2224	0
5.6064	0
0.7424	0
1.8944	0
7.6288	0
0.9728	0
0.9728	0
1.3312	0
3.8912	0
4.608	0.302326
0.1536	1
11.4176	0
0.128	0
9.1648	0
9.728	0.835897
2.5856	0
6.3488	0
0.0512	1
7.3984	0
1.6128	0
8.704	0
8.6528	0
4.9664	0
0.8192	0
6.4	0
7.7824	0
0.4096	1
16.384	0
9.3952	0
3.0464	0
0.8448	0
2.816	0
2.816	0
2.4576	1
11.0592	0
6.3232	0
2.8928	0
8.2432	0
39.296	0
8.7296	0
1.2544	1
2.4576	0
5.5296	0
3.6096	0
32.2304	0
7.8592	0
6.656	0
46.6688	0
28.2112	0
4.1216	0
0.2816	0
7.0656	0
1.5104	1
2.4576	1
0.7168	0
0.8448	0
4.1728	0
2.9184	0
0.9472	1
5.2224	0
1.1264	0
0.1792	0
8.3968	0
13.0304	0.508163
6.912	0
1.1008	0
2.4064	1
7.5264	0
2.816	0
10.0864	0
13.9008	0
7.2448	0
6.3488	0
2.7904	0
2.7648	1
8.9088	0
5.6576	0
9.6512	0
1.2544	1
5.5296	0
4.096	0
6.2464	0
0.256	1
1.1008	0
0.5376	0
8.448	0
4.6592	1
3.3024	0
27.8784	0
36.4032	0
15.6928	0
4.864	0
6.0416	0
5.632	0
27.264	0
0.256	0
2.2016	0
3.7376	1
1.6128	0
3.6096	0
11.1104	0
10.6496	0
5.4016	0
6.2976	0
2.9184	0
5.8112	0
3.456	0
18.3296	0
6.0672	0
3.4816	0
0.0512	0
6.4	0
4.6336	0
4.4032	0
4.3776	0
2.9696	0
5.7344	0
2.5088	0
13.5168	0
12.5184	0
0.768	0
8.576	0
5.3248	0
3.4816	0
8.2176	0
1.7408	0
2.0992	0
14.208	0
10.9568	0
21.5552	0
6.4768	0
11.1616	0
5.248	0
26.4192	0
9.216	0
6.528	0
7.8848	0
1.664	0
6.6816	0
14.0288	0
4.224	0
69.248	0
3.5328	0
3.7888	0
1.152	0
3.6352	0
6.2976	0
8.8832	0
6.656	0
9.8816	0
20.5568	0
4.224	0
2.2016	0
5.632	0
11.3664	0
6.784	0
7.8848	0
6.4256	0
12.1856	0
6.9632	0
132.659	0
6.272	0
8.1664	0
19.0976	0
6.7072	0
8.192	0
9.6512	0
7.936	0
11.7248	0
17.0496	0
5.76	0
5.504	0
5.9648	0
7.3984	0
3.0208	0
6.3488	0
3.3536	0
15.36	0
5.6576	0
0.1792	0
13.9776	0
4.3776	0
12.0576	0
7.6288	0
11.264	0
5.9136	0
2.816	0
7.8336	0
20.4544	0
0.7424	0
27.5712	0
6.4256	0
11.648	0
1.6896	0
122.112	0
5.1968	0
3.8656	0
11.8272	0
6.016	0
5.1456	0
10.7776	0
14.464	0
15.4368	0
29.312	0
0.3328	1
1.7152	0
4.3008	0
26.3424	0
3.968	0
7.1936	0
0.6912	0
1.6384	0
7.5264	0
7.1168	0
6.2208	0
2.2016	0
0.0768	0
0.0512	1
5.4272	0
22.5792	0
2.7648	0
5.9904	0
10.7008	0
7.424	0
1.2032	0
10.0352	0
3.6352	0
13.8496	0
2.8416	0
5.0432	0
9.8816	0
5.248	0
3.84	0
6.656	0
8.96	0
179.302	0
4.48	0
0.1792	0
6.4512	0
7.3472	0
2.816	0.205128
7.808	0
1.4592	0
11.2128	0
1.3056	0
5.4272	0
260.07	0
0.2816	0
9.8048	0
0.1024	0
0.4352	0
5.9392	0
0.6912	0
0.2048	0
12.8512	0
14.3104	0
1.536	0.0169492
3.5584	0
3.5328	0
5.4272	0
1.8944	0
7.2704	0
15.5648	0
3.1744	0
3.6352	0
215.706	0
1.8176	0
5.1968	0
19.6608	0
16.64	0
10.5728	0
1.536	0
2.7904	0
10.5728	0
5.6576	0
4.5056	0
11.136	0
3.5072	0
4.736	0
8.1408	0
4.0704	0
13.8752	0
12.9024	0
0.9472	1
5.8112	0
42.5216	0
7.68	0
25.8816	0.610714
5.8112	0
1.408	1
0.4864	0
6.5536	0
6.7072	0
9.6256	0
1.3312	1
23.0656	0
5.0176	0
7.2192	0.262548
8.1664	0
5.9648	0
9.088	0
2.4576	0
6.3232	0
3.8912	0
7.9104	0
3.9936	0
3.584	0
3.328	0
1.5872	0
9.1648	0
7.6544	0
4.1216	0
27.9552	0
8.4224	0
2.5088	0
7.7312	1
6.2208	0
9.216	0
7.4496	0
8.4992	0
9.0112	0
13.0304	0
0.6912	0
24.3968	0
1.5616	1
9.6768	0
13.44	0
6.1696	0
0.9984	1
0.2816	1
0.3328	0
7.7312	0
1.9456	0
1.024	1
7.936	0
27.1872	0
6.656	0
7.2704	0
3.9936	1
10.112	0
2.9696	0
0.0768	1
6.4512	0
2.2016	0
7.3472	0
1.5104	0
1.2032	1
8.3968	0
10.4448	0
20.864	0
0.1792	1
7.1168	0
2.432	0
12.5952	0.0941423
5.3248	0
5.6064	0
6.784	0
6.528	0
20.7616	0
1.408	1
6.6304	0
3.9424	0
25.472	0
4.608	0
29.4656	0
8.6016	0
6.8608	0
0.6912	1
7.8336	0
9.0368	0
0.7168	1
24.064	0
8.3456	0
233.037	0.677153
0.1536	0
38.2976	0
8.5248	0
22.3232	0
1.3056	1
7.8592	0
2.9696	0
6.7584	0
0.5632	1
7.2704	0
3.9424	0
6.6304	0
1.9968	0
10.1888	0
18.7392	0
7.1424	0
5.3248	0
10.3936	0
3.6608	0
6.7328	0
0.4352	1
9.0112	0
8.7552	0
26.1376	0
13.0048	0
9.3696	0
10.2912	0
7.6288	0
7.4752	0
6.7328	0
5.2992	0
7.3216	0
0.9216	1
2.4576	0
5.1968	0
3.3792	0
9.4976	0
6.2464	0
8.576	0
20.1472	0
14.08	0
6.6048	0
4.3008	0
0.3072	1
3.0976	0
1.0752	1
20.7872	0
0.5376	1
5.5808	0
8.448	0
22.3232	0
5.6064	0
9.6512	0
10.3936	0
4.096	0
21.9648	0
8.2176	0
7.4496	0
10.6752	0
7.2704	0
8.3456	0
6.3232	0
1.8432	0
1.9712	0
0.2304	0
1.4848	0
3.84	0
33.6128	0
5.9392	0
17.664	0
7.6032	0
18.048	0
4.7872	0.0698925
15.4368	0
5.0432	0
1.9712	0
1.7152	1
2.0224	1
6.8096	0
3.84	0
5.888	0
5.7856	0
17.664	0
8.4224	0
6.272	0
7.3216	0
0.9728	1
25.472	0
5.7856	0
8.0384	0
1.0752	1
5.1456	0
5.9136	0
12.3392	0
137.011	0
4.096	0
4.096	0
6.784	0
10.7264	0
5.248	0
5.0944	0
7.9616	0
8.0128	0
1.024	1
19.6608	0
7.3728	0
5.8624	0
11.008	0
4.5312	0
8.3968	0
5.76	0
3.9168	0
2.4064	0
0.64	1
1.6384	1
0.6656	1
3.1744	0
5.4272	0
8.2432	0
6.7584	0
14.8224	0
1.024	0
6.5792	0
25.6512	0
4.3008	0
9.9328	0
4.4544	1
7.5008	0
10.0352	0
7.7312	0
5.6576	0
10.5472	0
10.7008	0
2.8928	1
8.832	0
12.9536	0
7.2704	0
4.6336	0
1.1776	1
7.4496	0
0.384	0
14.3616	0
0.5632	1
4.1472	0
225.741	0.790344
0.64	1
1.7664	0
8.064	0
3.9936	0
1.2032	1
0.5376	1
12.7744	0
2.3808	0
228.762	0
4.224	0
6.9376	0
14.7456	0
4.2752	0
9.8048	0
106.24	0
8.7296	0
3.6608	1
13.9776	0
19.2	0
10.9312	0
3.0464	0
12.1088	0
3.3024	0
3.4816	0
11.4432	0
0.7936	0
2.6368	0.155556
4.9664	0
0.896	0
12.6464	0
5.4016	0
10.0864	0
29.44	0
1.408	0.302326
5.8368	0
1.2288	1
3.2768	0
2.176	0
1.28	0
17.6896	0.941532
5.2992	0
15.4624	0
2.0224	0
12.416	0
18.2784	0
9.0624	0
11.0848	0
27.264	0
9.1392	0
8.2688	0
17.3056	0
52.6848	0
10.8288	1
4.2496	0
0.5888	1
3.84	0
16.3328	0
1.28	1
2.7904	0
4.6848	0
5.9904	0
0.8448	0
14.6688	0
7.04	0
4.4544	0
2.56	0
6.1952	0
4.864	0
136.115	0
9.6512	0
3.712	0
4.8384	0
1.2288	0
12.1344	0
2.048	0
4.736	0
2.432	0
4.5824	0
0.128	0
3.0208	0
5.7856	0
9.6768	0
5.9136	0
5.6064	0
0.64	1
18.56	0
9.8048	0
2.9952	0
8.2688	0
1.536	0
7.168	0
13.2864	0
5.6576	0
20.7616	0.678049
4.6336	0
5.376	0
2.0736	0
6.2208	0
29.8752	0
7.9616	0
21.2224	0
2.2016	0
6.1696	0
9.9072	0
6.7584	0
5.5296	0
8.576	0
3.6096	0
3.328	0
6.0672	0
4.608	0
4.736	0
6.8608	0
0.7936	0
3.0464	0
1.536	0
0.7936	1
3.6352	0
11.8016	0
1.5104	0
11.8272	0
4.0192	0
3.6608	0
5.6832	0
15.9232	0
5.8112	0
3.6352	0
4.096	0
5.5808	0
1.6896	0
3.456	0
5.4528	0
2.2528	0
1.408	0
3.0976	0
26.6752	0
3.7632	0
2.432	0
8.0896	0
6.1952	0
5.2736	0
3.9424	0
10.6496	0
14.5408	0
10.1632	0
44.544	0
6.784	0
3.2768	0
11.2384	0
14.336	0
17.8432	0
5.1968	0
5.632	0
0.2816	1
2.5344	0
5.888	0
14.4128	0
2.3808	0
1.536	0
8.2944	0
4.0448	0
4.4032	0
9.8048	0
6.0672	0
4.1984	0
2.0224	0
0.6912	0
3.4304	0
7.296	0
9.5232	0
4.5312	0
34.2784	0
3.9936	0
6.272	0
8.0384	0
2.944	0
3.5584	0
8.6272	0
2.7136	0
13.952	0
9.6	0
2.2016	0
13.5424	0
3.1232	0
14.8736	0
6.6048	0
4.1728	0
5.6064	0
1.664	0
20.7872	0
1.7152	0
5.1968	0
5.2992	0
0.3584	0
12.3904	0
0.7168	0
4.5824	0
4.8896	0
10.752	0
6.2208	0
1.7152	0
125.798	0
2.4832	0
2.56	0
0.6656	0
24.448	0
2.7904	0
6.016	0
1.792	0
21.1456	0
8.3968	0
9.6256	0
6.016	0
6.656	0
12.16	0
0.768	0
13.7472	0
8.5504	0
1.92	0
3.3536	0
2.7136	0
3.9168	0
2.6368	0
7.424	0
0.4096	0
0.0512	0
7.7056	0
11.5712	0
6.6816	0
0.128	0
3.3792	0
1.7408	0
6.4	0
5.1712	0
5.1456	0
3.5328	0
5.0688	0
3.0464	0
3.9168	0
5.3248	0
1.8688	0
7.1168	0
8.448	0
7.7824	0
5.248	0
0.5376	0
9.216	0
4.5568	0
19.3536	0
4.0192	0
8.5248	0
9.472	0
7.424	0
26.0096	0
5.9904	0
7.3984	0
10.7008	0
1.2544	0
26.6496	0
11.4944	0
7.5776	0
7.0656	0
5.632	0
7.7824	0
5.7344	0
5.0176	0
6.144	0
0.7424	0
9.7792	0
5.4016	0
7.168	0
2.5856	0
4.3008	0
4.9152	0
22.7328	0
7.1936	0
4.3008	0
22.0416	0
21.5552	0
6.1952	0
9.3184	0
5.632	0
2.8672	0
33.8944	0
11.52	0
7.0144	0
19.3792	0
41.5744	0
7.9872	0
7.808	0
3.0464	0
8.8064	0
4.8384	0
6.144	0
8.1664	0
4.7104	0
38.2208	0
4.5312	0
4.48	0
4.6848	0
8.9344	0
8.6784	0
2.3552	0
7.6032	0
28.032	0
0.8192	0
4.8896	0
4.3776	0
13.7472	0
13.1072	0
5.0688	0
5.376	0
3.5072	0
2.048	0
4.4032	0
13.9264	0
8.0128	0
3.6864	0
40.1408	0
6.0928	0
6.4	0
21.8624	0
5.888	0
7.2192	0
2.1248	0
13.9776	0
7.0144	0
11.6736	0
23.296	0
4.9664	0
6.6304	0
23.424	0
16.4864	0
51.3024	0
3.5584	0
4.5568	0
5.8368	0
13.056	0
1.7408	0
3.5328	0
10.2656	0
49.2544	0
17.3824	0
3.3792	0
0.3072	0
9.2416	0
12.6208	0
4.1216	0
2.3296	0
12.4928	0
7.5008	0
4.3008	0
21.2992	0
3.9424	0
8.4736	0
17.3056	0
5.8368	0
2.4576	0
2.4064	0
5.8368	0
0.512	0
6.144	0
0.8448	0
2.1504	0
4.8384	0
6.9888	0
5.7856	0
3.4304	0
1.28	1
10.0096	0
4.608	0
14.1824	0
2.1504	0
13.824	0
3.584	0
10.496	0
10.88	0
0.1792	1
0.7936	0
6.9632	0
2.3296	0
2.7648	0
14.2848	0
2.7904	0
5.4016	0
5.2736	0
3.328	0
5.0432	0
22.7072	0
11.264	0
4.992	0
57.5744	0
5.8368	0
13.184	0
4.3776	0
1.9456	0
18.2016	0
4.3776	0
1.0752	0
5.0688	0
6.7072	0
0.4352	0
0.1536	0
11.0848	0
5.5296	0
0.2048	0
0.0768	0
11.264	0
4.608	0
3.456	0
5.1712	0
10.112	0
382.899	0
2.9184	0
11.9808	0
4.224	0
4.9152	0
5.0432	0
0.1536	0
6.3232	0
7.0144	0
14.4384	0
1.8944	0
0.7936	0
2.4576	0
3.1488	0
12.416	0
2.4832	0
12.032	0
4.1216	0
0.5632	1
5.5296	0
5.9904	0
3.1488	0
3.7632	0
2.9184	0
5.1712	0
3.5328	0
4.3264	0
4.7872	0
3.9424	0
1.0752	0
3.456	0
5.4272	0
6.4768	0
3.328	0
9.1904	0
0.8192	1
5.7088	0
4.352	0
17.4592	0
32.6656	0
8.3968	0
6.9632	0
1.2288	1
6.4	0
2.8672	0
15.4368	0
3.0208	0
5.6576	0
5.8624	0
0.256	0
1.2288	0
18.0224	0
3.1488	0
8.1664	0
2.432	0
6.0416	0
0.768	0
23.168	0
2.2016	0
1.536	0
5.3248	0
1.0752	0
12.2368	0
0.896	0
6.5792	0
0.5632	0
1.8432	0
5.6832	0
5.6832	0
5.1712	0
12.288	0
32.8448	0
7.424	0
6.7584	0
6.016	0
7.3984	0
20.8128	0
6.8608	0
5.1456	0
2.176	0
3.3792	0
6.5024	0
8.7552	0
14.9248	0
83.4816	0
3.2768	0
6.5792	0
5.4016	0
108.493	0
7.0912	0
7.2448	0
19.072	0
43.7248	0
5.5296	0
7.9872	0
3.712	0
8.9088	0
1.2288	0
15.4112	0
1.0752	0
6.6304	0
5.4528	0
5.4528	0
19.0976	0
8.96	0
2.2016	0
5.2736	0
1.4848	0
16.4096	0
9.3184	0
0.0768	0
8.6272	0
8.704	0
5.1456	0
0.0512	0
18.9952	0
1.3568	0
5.9648	0
6.1952	0
9.7792	0
12.1088	0
3.84	0
5.504	0
15.8976	0
4.6848	0
4.6592	0
10.112	0
6.144	0
13.0304	0
4.7872	0
5.9136	0
3.8144	0
14.6432	0
13.1328	0
12.9024	0
6.9632	0
4.3264	0
20.48	0
9.0368	0
29.2352	0
8.0128	0
5.248	0
1.2032	0
5.5808	0
5.1456	0
3.1232	0
3.2512	0
9.9328	0
11.5712	0
1.3056	0
10.9056	0
5.1456	0
2.8416	0
9.3952	0
10.9824	0
8.4736	0
8.6784	0
18.2784	0
17.5872	0
0.8192	0
4.736	0
5.2992	0
12.928	0
129.818	0
6.0416	0
6.912	0
6.7584	0
6.7584	0
4.9408	0
6.1184	0
6.6816	0
18.7648	0
4.1472	0
9.856	0
3.456	0
6.7328	0
7.5776	0
27.9808	0
6.2208	0
8.192	0
10.7008	0
3.5072	0
3.9936	0
2.9696	0
4.1728	0
6.0928	0
4.0448	0
2.304	0
16.6912	0
3.712	0
4.7104	0
4.352	0
103.526	0
7.5264	0
6.5024	0
6.6048	0
3.2512	0
6.6304	0
55.6032	0
0.7936	0
7.7568	0
5.8368	0
17.152	0
5.1968	0
3.1744	0
30.9248	0
11.9296	0
6.2464	0
6.656	0
7.296	0
128.666	0
5.248	0
5.9136	0
9.216	0
6.528	0
6.528	0
3.328	0
2.816	0
3.7632	0
8.3712	0
9.7536	0
2.2528	0
16.9472	0
6.784	0
6.8096	0
50.3296	0
6.3744	0
6.2976	0
2.5088	0
14.9248	0
8.8832	0
8.4736	0
5.12	0
6.3232	0
3.84	0
2.688	0
7.0144	0
2.7392	0
5.8112	0
1.6896	0
1.0752	0
12.9536	0
6.2464	0
7.5264	0
9.8304	0
8.8832	0
5.5808	0
11.9552	0
6.9888	0
3.2	0
2.816	0
6.7584	0
8.1664	0
5.9904	0
6.144	0
4.3264	0
5.9648	0
19.7376	0
50.688	0
5.4272	0
129.254	0
12.4672	0
6.4768	0
3.4816	0
6.656	0
7.1168	0
4.8384	0
21.7088	0
9.3184	0
12.8256	0
[truncated: 31,511 more rows]

## Sheet: Fig 3 Supp 2 raw p putida
aggregate_area	survival_rate
6.3232	0
5.1456	0
0.9728	0
0.2304	0
19.5072	0
0.6912	0
0.0512	0
3.6608	0
2.5344	0
3.712	0
16.0768	0
0.8192	0
10.0352	0
5.0176	0
3.328	0
2.7648	0
4.3264	0
8.2944	0
5.2736	0
4.4288	0
6.272	0
11.392	0
5.4784	0
1.8176	0
13.1584	0
4.6592	0
0.6656	0
16.9216	0.0472973
170.65	0.151978
1.2032	0
6.5024	0
9.7536	0
0.6912	0
8.32	0
5.6576	0
1.8944	0
1.1008	0
0.1536	0
0.5376	1
6.0416	0
8.8576	0
0.8448	0
83.1488	0.000785238
39.296	0
1.8688	0
6.5536	0
0.4096	0
7.3984	0
8.2944	0
0.9472	0
6.4512	0
17.2288	0
8.8064	0
21.1968	0.0595611
0.5376	0
5.3248	0
29.6704	0
2.432	0
1.2288	0
6.6048	0
10.1888	0
10.8032	0
8.6528	0
12.7744	0
1.152	1
6.1952	0
0.8448	1
0.2048	0
1.6128	0
2.6624	0
2.8416	0
7.5776	0
2.176	0
3.3024	0
2.944	0
0.8192	0
7.5264	0
6.528	0
8.5248	0
0.1024	0
0.256	0
4.4288	0
0.2048	0
2.048	0.571429
3.5072	0
7.2704	0
0.7168	0
10.3168	0
3.0464	0
6.4768	0
4.736	0
2.56	0
5.0944	0
31.232	0
1.664	0
12.672	0
17.3312	0
11.1104	0
12.0064	0.008
16.6144	0
7.8336	0
4.3008	0
21.248	0
7.3984	0
2.4832	0
62.8224	0
3.968	0
1.9712	0
1.8944	0
11.52	0.035
5.888	0
13.2864	0
19.5072	0.0619621
2.3552	0
14.848	0
2.7904	0
17.2288	0
9.6	0
8.4992	0
12.5696	0
26.5472	0
7.7312	0
6.016	0
2.176	0
4.2496	0
0.2816	0
7.8848	0
0.6656	0
1.6896	0
3.2768	0
2.688	0
9.4208	0
4.5056	0
6.2464	0
11.4176	0
0.3584	0
9.6512	0
7.1424	0
5.7344	0
0.768	0
3.0976	0
2.4832	0
1.5872	0
3.2	0
2.0224	0
5.12	0
2.3808	0
1.9968	0
6.5536	0
2.6368	0
2.5088	0
1.5872	0
6.1696	0.120482
9.5488	0
7.1424	0
5.4016	0
3.9168	0
8.32	0.107143
4.3776	0
8.2688	0
1.4336	0
3.3792	0
4.1984	0
4.608	0
5.9136	0
11.1104	0
8.9088	0
4.7616	0
11.5712	0
3.968	0
19.2256	0
3.6608	0
8.2432	0
13.9776	0
12.16	0
2.3296	0
3.584	0.4
7.0144	0
5.0944	0
2.0992	0
18.8928	0
7.7056	0
5.76	0.156398
8.4224	0
5.6832	0
4.7872	0
12.1088	0.0414634
2.4064	0
5.2736	0
7.6544	0
4.3264	0
21.2224	0
3.3536	0
6.8352	0
4.864	0
9.984	0
9.6256	0
5.7856	0
7.68	0
7.5008	0
36.0704	0
17.8432	0.019544
2.6368	0
4.7616	0.0759494
15.8976	0
5.12	0
2.176	0
3.0976	0
3.968	0
5.6064	0
1.7664	0
3.072	0
6.0416	0
3.8656	0
3.0208	0
2.688	0
4.5056	0
14.1056	0
12.672	0
100.659	0.0205556
3.2512	0
29.056	0.0331754
10.6496	0
48.384	0
6.6048	0
4.9664	0
6.6304	0
9.9328	0
9.216	0
13.312	0
3.0464	0
3.84	0
10.4704	0
5.4016	0
0.5888	0
4.4032	0
10.1376	0.0600601
4.2752	0.3
2.2784	0
3.2256	0
0.3072	0
8.3968	0
7.936	0
2.7136	0
8.192	0
8.2176	0
26.0864	0
8.192	0
11.6992	0
6.3488	0
2.2528	0
7.3984	0
6.2464	0.0225225
8.704	0
18.4832	0
7.4496	0
5.1712	0
2.4064	0
15.7952	0.0202361
5.3248	0
5.0944	0
7.7056	0
1.4848	0
4.0448	0
4.1472	0
1.8944	0
8.3968	0
1.792	0
3.2256	0
3.4816	0
8.1664	0
7.7312	0
4.5312	0
3.0464	0
15.3856	0
1.5104	0
10.7008	0
59.1104	0.0255682
6.4256	0
8.3712	0
5.9648	0
13.7728	0
9.1904	0
3.3792	0
9.1136	0
16.4608	0
17.2288	0.0616667
6.9376	0
0.3328	0
6.4512	0
1.8432	0
2.9696	0
3.4304	0
8.1408	0
21.8624	0
5.504	0
5.0944	0
4.0704	0
24.3712	0
1.8176	0
2.1248	0
12.1088	0
13.0816	0
7.168	0
14.6432	0
5.1712	0
2.56	0
35.2256	0.112195
13.312	0
3.328	0
24.6016	0.0327654
1.2288	0
6.784	0
1.2288	0
3.6096	0
3.584	0
2.176	0.118421
3.6608	0
10.9824	0
7.7824	0
10.3936	0
4.2496	0
4.352	0
4.5824	0
15.1808	0.0205011
8.3968	0
6.4512	0.142202
20.3264	0
13.056	0
8.9088	0
13.3888	0
0.64	0
20.224	0
4.864	0
6.2208	0
4.0704	0
2.56	0
4.1984	0
6.912	0
0.1024	0
6.8352	0
8.32	0.110345
7.424	0
9.7792	0
5.5296	0
13.5424	0
7.8336	0
28.0832	0
8.32	0
6.9888	0
3.712	0
5.7088	0
3.2512	0
27.8784	0
1.7408	0
3.5584	0.113043
170.829	0.208779
1.0496	0
14.6944	0.206186
2.048	0
9.6512	0
7.2704	0
5.4528	0
5.3504	0
6.784	0
12.8	0
10.0352	0.0310734
10.3424	0
9.1392	0
7.7824	0
38.8352	0
4.2752	0
4.5312	0
4.0192	0
4.0704	0.228571
5.1712	0
5.9392	0
1.1776	0.918919
5.248	0
6.4512	0
0.768	0
9.3184	0
5.4784	0
3.8144	0
2.7904	0
4.0704	0
5.76	0
0.1536	0
1.5616	0
6.9376	0
7.808	0
13.312	0.332569
4.6848	0
4.4544	0
5.9392	0
14.464	0
34.6368	0.016488
15.9232	0
19.1488	0.0514469
32.3072	0
6.1184	0
8.1408	0
8.4736	0
9.0112	0
4.9408	0
8.9856	0
5.504	0.216867
6.144	0
0.5632	0
4.3264	0
5.76	0
10.368	0
9.9584	0
5.9904	0
6.144	0.142241
5.4016	0
16.6144	0
1.1264	0
9.0112	0.0660066
7.4752	0
6.3232	0
0.8192	0
5.8368	0.0252525
5.1456	0
6.2976	0
3.5072	0
7.4496	0
0.2048	0
5.8112	0.0224719
33.4592	0.163914
24.6272	0
7.936	0
2.56	0
6.1184	0
2.8672	0.213115
9.6512	0
4.1728	0
5.376	0
1.3312	0
1.8432	0
2.944	0
0.6912	0
42.7264	0
5.9904	0
16.384	0
0.128	0
0.4096	0
1.152	0
3.5072	0
3.5328	0
19.1488	0
23.8848	0.00119474
4.6592	0
1.1776	0
0.9216	0
0.8704	0
0.1792	0
3.0976	0
4.4288	0
4.2496	0
8.9344	0.308772
7.296	0
1.6896	0
8.448	0
4.3008	0
5.9648	0
1.408	0
0.64	0
1.6384	0
3.2	0
0.4352	0
8.2688	0
3.1232	0
4.2752	0
24.7296	0
2.5344	0
0.64	0
6.9888	0
4.8384	0
11.5968	0
0.7424	0
7.0912	0.543933
1.7664	0.103448
2.2784	0
3.0208	0
18.6112	0.0518053
24.4992	0
3.7888	0.147826
2.3296	1
4.5056	0
28.288	0
0.8192	0
2.9696	0
0.7936	0
0.512	0
10.5216	0
8.7552	0
4.7616	0
0.4608	0
2.2272	0
4.8128	0
10.8544	0
0.64	0
2.9184	0
1.4592	0
5.8624	0.178082
2.7392	0
3.1232	0.981308
8.3968	0
15.1296	0
54.4	0.00867245
5.9648	0.174129
0.4864	0
6.5792	0
2.2272	0
19.6352	0.0628019
3.8144	0
2.1504	0
7.808	0
7.2448	0
5.4272	0.102941
7.296	0
1.9712	0
9.6256	0
8.576	0
6.0928	0
2.6624	0
4.3264	0
4.8384	0
1.5616	0
4.1216	0
5.0176	0
5.12	0
14.2592	0.0578778
2.7392	0
3.5584	0
6.3744	0.247706
1.6128	0
37.2736	0
6.7584	0
161.357	0.226683
1.8688	0
1.5616	0
42.496	0.0195024
9.6	0
23.0144	0.052161
6.016	0
6.2976	0
6.0672	0
0.3584	0
0.2816	0
5.888	0
7.1936	0
10.0608	0
0.8448	0
0.3328	0
7.6032	0
6.016	0
51.9424	0
2.7904	0
0.2304	0
1.3568	0
8.0896	0
2.048	0
6.1696	0
3.6608	0
4.224	0
4.7104	0
5.6832	0
10.6752	0
4.2496	0
2.432	0
3.3024	0
4.5824	0
13.4656	0
15.36	0.0982143
4.8896	0
7.2192	0
2.5856	0
1.3568	0
3.328	0
6.912	0
4.8896	0
4.3776	0
10.5728	0
13.9008	0
7.4752	0
4.3008	0
1.408	0
5.2992	0
0.1536	0
5.376	0
5.4528	0
2.0736	0.315789
5.1712	0
4.5312	0
11.2896	0
8.1152	0
5.4784	0
2.8672	0
3.6608	0
8.6016	0
1.3568	0
6.6816	0
5.9136	0
2.3552	0
4.4544	0
5.8112	0
8.32	0
1.2288	1
2.0224	0
11.8016	0
5.7344	0
5.5296	0
6.8608	0
8.1408	0
5.0688	0
2.9696	0
4.8128	0
5.4528	0
4.2496	0
1.3568	0
3.7376	0
1.4336	0
8.3968	0
24.32	0.0261661
18.5088	0
2.2528	0
7.5264	0
25.7536	0
6.2464	0.103604
12.928	0
17.3312	0.0366412
3.7376	0
0.6912	0
8.1152	0
2.5088	0
8.448	0
13.184	0
1.9456	0
20.7104	0
6.528	0
9.4976	0
1.2288	0.146341
7.3728	0
4.9664	0
12.288	0
2.9952	0.558559
8.96	0
5.3248	0
7.9872	0.109541
8.7808	0
14.1056	0
1.1776	0
27.2384	0
4.352	0
4.7872	0
2.2784	0
7.1168	0
9.0624	0
4.6592	0
17.0496	0
17.792	0
3.6608	0.620155
7.2448	0
10.3168	0
2.1504	0
3.5584	0
5.1712	0
2.1504	0
3.9424	0
6.784	0.181347
10.88	0
3.8656	0
39.1424	0
9.5232	0
2.1248	1
7.3728	0.00884956
5.6576	0
4.608	0
3.0208	0
9.7792	0.0258621
9.984	0
14.464	0
8.704	0
10.5984	0.146341
8.0896	0
9.4464	0
62.8736	0.376045
2.7904	0
3.9936	0
70.0928	0.240943
3.5584	0
14.592	0
2.56	0
12.2624	0.0960452
8.832	0
2.1504	0
6.8352	0
131.43	0.622004
1.9456	0
0.3584	0
4.1728	0
2.8672	0
3.968	0
8.064	0
32.1536	0.0445931
2.2016	0
2.432	0
7.1936	0.12782
7.7312	0
5.6832	0
6.2464	0
1.0752	1
5.5296	0
6.9376	0
0.6912	0
0.8448	0
11.0848	0
6.8352	0
3.4816	0
0.128	0
0.5888	0
0.64	0
2.048	0.75
8.4224	0
4.7616	0
7.5264	0
4.5824	0
5.0176	0.807692
4.9152	0
4.6592	0.355263
4.608	0
7.1424	0
1.5872	0
0.3584	0
6.2208	0
2.0992	0.333333
7.1936	0
5.9904	0
5.9648	0
4.352	0.278146
4.4288	0
6.3744	0
8.6272	0
1.8432	0
17.6896	0.0464
1.5616	0
0.384	0
3.5072	0
3.2512	0.657407
1.2288	1
1.2032	0
6.4	0.261905
144.666	0.204603
8.8576	0
5.4272	0
2.9184	0
0.4096	0
1.408	0.75
3.456	0
8.9088	0
9.7792	0
3.456	0.386555
0.4352	0
6.6816	0
6.1696	0
4.9408	0.0165746
15.0784	0.421053
1.7152	0
2.2016	0
1.3312	0
1.9712	0
4.608	0
0.9728	0
2.0992	0.578947
10.0608	0.290141
12.0832	0
6.0672	0
2.2016	0.691176
2.2016	0
8.6528	0
8.1152	0.494318
1.5104	0
165.965	0.0344685
10.6752	0
1.5104	0.666667
3.1488	0
4.5312	0
1.1008	0
4.0192	0.948148
4.4544	0.702899
0.4864	0
6.016	0.145455
3.5584	0
53.3504	0
0.8704	0
5.632	0
5.2736	0.0670732
6.2464	0
9.3696	0.221453
4.736	0
13.3632	0.279835
7.0656	0
4.1472	0
2.4064	0.230769
1.5104	0
4.3264	0
9.7024	0
1.3568	0
11.3152	0
0.64	0
0.1792	0
4.2496	0
3.3024	0.413793
0.8704	1
6.0416	0
20.6848	0.0554675
8.2688	0
4.7104	0
0.64	0
0.256	1
5.2224	0
1.0752	0.586207
7.1168	0
7.1168	0.0368098
4.5824	0
11.776	0.0962441
9.7792	0
11.8784	0.834025
1.92	0
56.6272	0.573473
131.866	0.537308
0.5888	0
9.7536	0
0.5888	0
6.0928	0
1.152	1
7.5008	0
0.7936	0
4.2496	0
4.5824	0
4.9408	0.183007
12.7488	0
16.4608	0.0742972
0.4352	0
12.672	0.140969
0.4608	0
3.2	0.45977
0.1536	0
0.5376	0
1.5872	0
7.2192	0
4.3264	0
8.6528	0
5.4784	0
2.7904	0
7.3472	0
1.3312	0
10.752	0
0.1792	0
5.1968	0
6.3232	0
10.2656	0
0.0768	0
3.6864	0
2.2272	0
0.768	0
0.9472	1
1.664	0
1.3568	0
1.6896	0
15.9488	0
1.0752	0
1.3056	0
1.792	0
2.304	1
37.8624	0.152062
0.3328	0.285714
0.2816	0
0.1792	1
0.8448	0
0.1536	0
8.9088	0
1.536	0
0.3584	0
0.0512	0
3.072	0
1.3568	0
0.1536	0
6.0416	0
1.5872	1
0.256	0
8.5248	0
5.7856	0
2.56	0
3.968	0
3.0208	0
3.4048	0
2.5088	0
78.8992	0.0329331
11.5456	0
6.0416	0
22.4768	0.00312989
5.8624	0
2.6368	0
3.7632	0
0.1792	0
0.2048	0
5.6064	0.101695
5.6064	0
7.3472	0
0.0768	1
2.9184	0
0.0768	1
0.0768	0
3.8912	1
9.6768	0
6.1184	1
26.3936	0.0227273
1.0496	0
0.9216	1
5.4528	0
2.0736	0
1.4592	0
24.0384	0.00681431
6.0928	0
5.0176	0
2.6624	0
0.4096	1
0.6144	1
3.456	0
3.5584	0
5.1968	0
5.0176	0
12.2112	0
2.0736	0
6.1184	0
3.968	0
8.8832	0
4.9152	0
0.128	1
2.2784	0
6.8352	0
1.5872	0
2.3808	0
8.5248	0
6.016	0
25.728	0
3.3792	0
333.773	0.11084
4.6848	0
17.9456	0.0664452
35.584	0.529595
2.5344	1
7.68	0
4.8384	0
7.7824	0
5.6832	0
22.1952	0
1.7664	0
6.5792	0
14.1056	0
0.4352	0
7.296	0
3.4816	0
3.9936	0
9.856	0
3.8144	0
5.504	0.765027
10.624	0.117647
1.5872	0
1.6896	0.372881
0.2304	0
25.6512	0
3.1744	0
1.5104	0.583333
9.1648	0
2.7392	0.5
4.9152	0
23.552	0
7.0656	0
1.8944	0
2.7392	0.534884
3.7376	0
0.3328	0
2.1248	0
7.9872	0
0.0768	0
14.6688	0
6.2464	0.210884
0.1024	0
9.856	0.558974
0.512	0
6.7584	0
1.2288	0.333333
2.9184	0
1.9968	0.0930233
16.9216	0
12.032	0.032967
129.946	0.60948
5.7088	0
9.0624	0.141762
0.3584	1
2.2528	0
0.4608	0
7.7312	0.0899281
1.536	0
3.9424	0.246479
3.2	0.604396
5.6576	0
5.4528	0
4.1216	0
158.848	0.178255
0.9728	0
2.3808	0
9.1648	0.211712
0.3584	0
2.6112	0
7.8592	0
5.2736	0
3.8144	0.0756303
8.2944	0.226131
2.176	0
0.9984	1
6.4512	0
9.1392	0
5.4272	0.146919
1.8944	0
0.4096	0
7.3728	0
0.7168	0
5.632	0.240741
3.2768	0.353659
7.5776	0.157258
5.5808	0
1.1264	1
19.4304	0
52.736	0.546961
1.92	0.684211
1.408	1
3.6608	0.495146
4.608	0.356589
22.3744	0
17.8688	0.0448598
0.512	0
3.584	0
2.8672	0
0.3584	0
5.888	0
13.1584	0.05
2.9184	0
0.2816	0
1.6896	0.561404
13.5936	0
25.8816	0
1.8944	0
1.664	0
1.1264	1
0.0768	1
6.3232	0
5.8624	0.0338164
6.2464	0
1.3824	0
3.4816	0
2.0224	0.357143
0.128	1
5.3248	0
4.736	0
1.2032	1
3.456	0
5.4528	0
0.6656	1
1.5872	0
8.9344	0
4.1984	0.715517
1.408	0
6.5536	0
6.8864	0
83.328	0.568519
2.4064	0
0.1792	0
8.6016	0
1.4592	0
9.088	0
8.3712	0
5.1712	0
1.4848	0
3.2	0
1.1776	1
0.1024	0
15.9232	0
0.3072	0
0.8448	0
6.0672	0
3.6096	0
8.2688	0
0.0768	1
5.632	0
1.6384	0
3.712	0
1.6896	0
4.6848	0.744361
3.2	0
4.8384	0
4.1984	0.192857
1.8688	0
1.4592	0
0.1024	1
8.7808	0.184314
16.256	0.795389
6.0928	0
5.5296	0
1.1264	0
1.6896	0
3.3792	0
3.1232	0
3.0464	0
1.4592	0
3.8144	0
9.0112	0
17.8176	0.0224913
3.968	0
12.1088	0
1.4592	0
0.9984	0
0.2304	0
0.6656	0
1.92	0
2.56	0
0.7424	1
5.888	0
10.2144	0
1.1008	0
2.6624	0
3.0976	0.989247
5.2224	0
5.4784	0
7.68	0.139344
2.2272	0
6.5024	0
0.384	0
0.4352	1
3.2256	0
8.2688	0
15.3088	0.0960187
8.2944	0.143369
5.7856	0
3.584	0
8.32	0.13617
2.7904	0
9.7792	0
7.296	0
0.1536	0
29.0048	0
3.2512	0
7.9104	0
3.7376	0
5.5552	0
4.0448	0
2.1248	0
4.096	0
6.7584	0
1.9456	0
5.888	0
13.3632	0
12.032	0
1.8944	0
2.0224	0
0.256	0
5.5552	0
5.6832	0
1.3056	0
0.1536	0
4.5568	0
1.7664	0
3.1744	0
11.4944	0
1.5616	0
2.9696	0.174312
7.68	0
0.9216	0
7.168	0.0827338
5.888	0.00740741
15.36	0.121622
5.3248	0
7.3728	0
4.2496	0
8.8576	0.080292
4.6336	0
1.7664	0
2.816	0
5.0688	0
1.408	0
4.1984	0
7.2192	0
4.3008	0.138365
4.3008	0
4.5056	0
7.8336	0.180077
3.8144	0
8.8576	0
4.6848	0
20.1728	0
1.536	0
1.5872	0
4.3008	0
27.1872	0.045122
28.16	0.0832232
7.2192	0
25.344	0.0011655
1.152	0
3.7888	0
2.7904	0
10.1632	0.108197
8.704	0
5.9648	0
7.552	0
6.8864	0.152838
2.7392	0
5.7344	0
1.6896	0
2.0224	0
6.2976	0
4.8384	0
4.9152	0
5.888	0
3.9936	0
3.9424	0
7.5776	0
1.2032	0
4.48	0
1.1776	0
5.2224	0
19.8912	0
21.0944	0.0366972
3.6864	0
4.4288	0
4.352	0
5.9904	0
6.7072	0.213389
35.1232	0.0675926
14.1824	0
0.256	0
1.5872	0
2.2784	0
9.472	0.108359
1.9456	0
5.7088	0
10.4192	0
8.4992	0.121771
5.5296	0
2.304	0
6.6304	0
15.872	0.0438596
7.1424	0
7.7824	0
7.6032	0
5.2736	0
6.9376	0
7.552	0.0458015
10.9824	0
4.7104	0
5.0688	0
12.8256	0.0168421
11.2128	0.25788
5.0432	0.185792
2.7136	0
2.7392	0
0.8704	1
4.9664	0
3.968	0
3.0976	0
3.3792	0
0.6144	0
0.9728	0
5.1456	0
10.9824	0.111663
5.1456	0
4.1216	0
8.064	0
5.7344	0
10.88	0
2.2016	0
8.0896	0.137255
11.5968	0
4.4288	0
15.7696	0
3.6352	0
16.5376	0.0212072
13.2352	0.0701754
6.4768	0
5.2736	0
6.656	0
11.904	0.0963303
3.0464	0
1.8688	0
6.3488	0.27897
20.7104	0.230357
2.5344	0
5.2992	0
2.304	0.268293
4.8384	0
8.6272	0
5.2224	0
2.304	0
2.6368	0
2.7648	0
1.8432	0
13.7216	0
1.8176	0
2.4832	0
1.792	0
9.1136	0
5.4272	0
1.5616	0
12.6464	0.115578
1.536	0
3.8912	0.277311
9.1904	0
7.04	0
13.44	0.0380313
2.0736	0
7.424	0
1.536	0
11.776	0
2.8928	0
6.1952	0
5.6576	0
3.2256	0
8.2432	0.208481
0.4352	0
4.5568	0
4.0448	0
13.2096	0.0684932
19.0976	0
3.7632	0
5.4784	0.101449
9.728	0
8.832	0
5.888	0
3.968	0
9.5744	0
7.808	0
2.3552	0
2.1248	0
2.6368	0
10.7008	0
14.6944	0.265748
3.8144	0
1.8688	0
13.5424	0
5.4528	0
1.664	0
6.5792	0
9.1136	0
1.92	0
2.2272	0
6.3488	0
3.5328	0
4.8896	0
8.9088	0
0.4608	0
3.2512	0
2.944	0
8.1664	0.109966
5.4528	0
0.2048	0
2.5344	0
5.7088	0
5.4272	0
2.432	0
4.5824	0
1.9968	0
11.648	0
7.0144	0.196
5.5808	0
2.048	0
5.3248	0
10.5216	0
163.021	0.254811
7.5776	0.242188
4.7616	0
2.5344	0
6.144	0.442478
7.0144	0
4.0704	0.222222
44.672	0.00382263
6.5536	0
1.7408	0
10.2144	0
2.432	0.482143
5.6832	0
2.2272	0
5.7344	0
9.0368	0
7.2704	0
18.7648	0
36.992	0
1.8432	0
0.1792	0
2.8672	0.752577
2.7392	0
6.4256	0
4.9152	0
8.704	0
14.7456	0.0381356
5.248	0
9.6512	0
16.0256	0
3.7632	0
1.792	0
8.1664	0
7.9872	0.176692
3.2768	0
0.6656	1
3.8656	0
10.752	0
1.2288	0
6.7328	0
11.8272	0.0155556
0.9472	0
6.2208	0
3.6352	0
3.4816	0
5.8624	0
4.096	0.28
0.5632	1
7.6544	0
4.6592	0
4.224	0
4.9664	0.169935
7.4496	0
7.936	0
5.0176	0
10.496	0.103659
5.3248	0
7.168	0
7.7824	0.122222
1.0496	0
15.9744	0
41.2416	0.0400943
9.344	0
2.944	0
5.6576	0
20.4032	0.0160584
5.376	0
7.8592	0.060241
5.6832	0.126214
3.1488	0
12.288	0
6.3232	0
29.184	0.0691334
5.2736	0
2.048	0
5.7344	0.211538
5.248	0
4.2496	0
5.6064	0.112745
8.3712	0
0.8704	1
0.9728	0
1.1008	0
4.8896	0
3.0464	0
7.4752	0
13.5424	0.0310881
5.3248	0
4.9152	0.134831
8.3712	0
4.0192	0
2.7392	0
0.8704	0
12.4928	0
10.2656	0
1.9968	0
11.8016	0.194737
1.408	0
15.5904	0.107075
6.1184	0
1.792	0
1.5872	0
23.2448	0
9.1392	0
11.776	0.175258
2.9696	0
2.8416	0
13.0816	0
5.248	0.135135
5.5552	0
8.448	0
8.4992	0
14.4128	0.156909
1.8944	0.441176
4.1216	0
1.6896	0
9.2928	0.068323
3.9936	0
5.0688	0
4.5568	0
22.0416	0.0146699
4.8128	0
7.2192	0
4.1984	0
8.32	0
4.864	0
12.7744	0
9.472	0
5.0688	0
0.768	0
24.832	0.133867
14.1568	0
4.9152	0
4.8896	0
6.0672	0
4.5568	0
5.9136	0
7.552	0
2.1504	0
2.6368	0
10.4192	0
5.6576	0
2.304	0
2.0992	0
4.4544	0
2.816	0
7.5008	0
6.3744	0
6.2208	0
5.504	0
2.2528	0
10.496	0
2.4064	0.340909
6.272	0
8.2944	0
5.2992	0
1.8688	0
4.9408	0
7.8848	0
4.1216	0
8.8064	0
3.9168	0
2.3808	0
2.6112	0
8.8832	0
1.6896	0
4.1728	0
8.8576	0.266026
9.7024	0
9.344	0
73.5232	0.0581669
9.6256	0
4.6336	0
5.5808	0
2.6112	0
3.84	0
9.984	0
3.0464	0
2.688	0
10.0608	0
3.2	0
4.6592	0
7.3984	0
5.6064	0
5.8624	0.408602
7.168	0
4.4544	0
4.1216	0
1.6896	0
9.4464	0
9.5488	0
3.1232	0
5.2224	0.1625
4.352	0
3.6608	0
13.0304	0
1.2544	0
2.3808	0
4.7616	0
0.9728	0
0.7936	0
5.1456	0
11.4688	0
2.56	0.378049
1.7152	0
0.1792	0
64.6912	0.0227996
13.3632	0
0.5376	0
6.2976	0
12.0832	0.183417
1.408	0
20.8896	0.0612745
29.9776	0.142439
2.6624	0
4.8384	0
17.8432	0.0390879
5.6064	0
4.6336	0
21.7344	0.0438247
0.8704	0
0.9216	0
6.5024	0
41.2928	0.0457571
5.4272	0.179348
6.5792	0
1.4336	0.552632
4.7872	0
3.2512	0
2.688	0
22.912	0
6.7584	0
6.4512	0
5.5296	0
10.9824	0
56.9088	0.134209
2.6624	0
2.2272	0
1.2544	0
6.9888	0
495.744	0.638669
22.8096	0.430642
17.2032	0
6.7072	0.194093
7.168	0
6.8352	0
8.832	0
4.5568	0
10.5984	0
8.4736	0.217054
6.784	0
37.0944	0.304024
3.6352	0
12.8512	0
9.1136	0
3.8144	0
18.688	0.0646688
6.528	0
8.576	0
5.6064	0.132948
3.7888	0
4.7104	0
0.128	1
6.272	0
6.2976	0
6.7584	0.443548
6.9632	0
3.8144	0
0.4864	0
3.0976	0
1.664	0.490909
4.5568	0
7.552	0
12.7744	0
6.6816	0.492537
6.656	0
8.4224	0
5.6064	0
5.3248	0
0.0768	1
7.3728	0
1.3824	0
3.6864	0
0.8704	1
19.8912	0
108.518	0.37533
0.8448	1
14.1824	0
6.016	0
0.5376	0
2.6112	0.277228
2.688	0
5.248	0
4.6336	0
6.4256	0.502825
5.8112	0
0.256	0
7.2448	0.0107527
3.1744	0
1.0496	0
0.128	0
1.1008	0.46875
0.0512	0
4.4544	0
3.2256	0
0.1024	0
4.2752	0
1.8176	0
6.3744	0
1.5616	0
5.6832	0
4.8128	0.810219
7.4752	0
0.4864	0
7.3728	0
7.3472	0
0.6144	0
2.8416	0
6.5024	0
0.3328	1
4.1216	0.142857
31.9744	0
3.6352	0
4.3008	0
6.1696	0
1.0496	1
3.2512	0.5875
0.1536	0
0.64	0
1.3568	1
1.2288	0
2.6624	0
17.2032	0
7.9872	0
1.664	0
1.4592	0
0.256	0
5.4016	0
6.6048	0
8.6272	0
23.7056	0.604167
12.8768	0
6.0672	0
4.3264	0
2.688	0
0.7424	0
10.8288	0
5.0432	0.521008
0.896	1
4.7104	0
0.6912	1
20.992	0
4.3264	0
2.3552	0
1.7664	0
6.7328	0
0.0768	0
11.392	0.0340314
19.0208	0
5.12	0
10.6496	0.1
5.376	0
7.2192	0
2.7136	0
9.5488	0.387097
233.83	0.494398
0.0768	1
7.5776	0
0.6912	1
8.192	0
4.096	0
17.1264	0
1.024	0
29.2096	0.355641
1.3824	0
5.888	0
0.2816	1
4.5824	0
7.6288	0
4.0448	0.973913
4.7104	0
0.2304	0
2.688	0
0.3584	0
6.2976	0.173516
9.1648	0
3.328	0.852941
1.5616	0
5.7856	0
0.0768	0
30.72	0
11.264	0.192513
8.6784	0
3.1744	0.0365854
5.4528	0
4.5568	0
4.5312	0
4.6848	0
1.792	0.162162
8.832	0
4.352	0
11.1616	0
8.704	0
6.9632	0
5.2736	0
1.9968	0
8.2944	0
2.4832	1
0.0768	0
0.9216	1
0.0512	0
7.3472	0
10.112	0.0409836
1.7664	0.72
5.376	0.236486
15.6416	0.0113122
0.0768	0
4.3008	0.413223
1.7408	0
8.5504	0
1.3312	0
5.6576	0
4.992	0
0.896	1
4.8384	0
5.6576	0
10.2144	0.127451
3.2	0
3.6608	0
0.8704	0
3.9936	0
2.2272	0
11.648	0
6.9376	0.174419
1.1776	1
5.2992	0
4.3264	0
25.6	0
1.5872	0
7.5008	0.149485
13.568	0
4.1216	0
7.8592	0
6.0672	0
1.792	0
0.384	0
1.024	0
6.6304	0
39.2704	0.0194915
9.1904	0.743902
10.112	0.095082
20.864	0
7.7056	0
3.4048	0
9.1648	1
2.8672	0.495327
2.4832	0
6.0672	0
5.9648	0
4.4032	0.578947
5.888	0
2.2528	0
8.448	0
6.8608	0.163793
20.2496	0
5.2224	0
3.2	0
7.0912	0
8.96	0
3.9424	0
4.1984	0
0.2304	0
4.352	0
3.4816	0
2.0992	0
6.2464	0
11.6224	0
0.64	0
5.8112	0
2.9696	1
2.1248	0
7.9104	0
3.8656	0
6.6048	0.128906
1.28	0.55
0.9472	1
5.0176	0.0862069
6.528	0.162393
13.0048	0
14.1056	0
5.6064	0.190476
8.6016	0.0766667
4.2752	0.823077
3.1744	0.867925
15.5648	0.597015
3.6352	0
11.2896	0
1.1008	0
4.48	0
3.2	0
2.2528	0.491228
8.832	0
6.144	0
6.9888	0
2.8672	0
4.3776	0.0833333
8.1664	0
4.3008	0
6.1184	0
2.8416	0
7.3984	0
9.1904	0
3.1488	0
0.8704	0
7.5008	0.104167
7.6288	0
4.352	0
9.728	0
243.584	0.88722
5.9648	0
4.5056	0.157895
6.3488	0
2.944	0
10.5472	0
2.7392	0
5.2224	0
6.7328	0.114286
13.7216	0.541806
10.0096	0
1.9456	0
11.6992	0
5.7088	0
5.9392	0
2.176	0
5.5296	0
8.32	0.185792
2.6624	0
2.048	1
3.6864	0
3.9168	0
5.7344	0
1.408	0
3.1232	0
2.2784	0
3.2256	0.478992
29.5424	0.371938
5.7856	0
4.9152	0.137681
5.248	0
0.896	1
0.1792	0
12.288	0
1.6128	0
48.4096	0.0136778
19.0976	0.00324675
5.0688	0
1.28	0
0.2304	1
0.2048	0
8.0128	0
0.9472	1
3.3792	0
5.9392	0.160194
0.6912	1
4.9408	0
0.2816	0
4.1984	0
1.2032	0
7.1936	0
2.944	0.359223
1.3824	0
3.2256	0.321839
7.1936	0
1.536	0
8.9344	0
8.2944	0
1.6896	0
1.6896	0
15.1808	0
4.3776	0
13.3888	0
3.1488	0
4.5312	0
14.2848	0.114537
1.536	0.5
1.0496	0
15.616	0.368421
5.0944	0
4.992	0
0.7168	0
7.3728	0.140097
4.1728	0
0.9984	1
8.832	0
2.56	0
4.6336	0
0.8704	0
5.8368	0
2.4576	0
25.344	0
8.3968	0
27.8528	0.488839
6.9376	0
7.68	0.502415
0.4608	0
30.0032	0.0635897
4.6336	0
7.9104	0
0.9216	0
27.0848	0.0604752
7.7312	0
1.7664	0
2.0736	0
1.6896	0
8.8576	0
9.3184	0.172297
2.2784	0.1625
8.9344	0
0.64	0
[truncated: 27,061 more rows]
