# Supplementary material for: Bacterial survival in microscopic surface wetness
Source: eLife. 2019 Oct 15;8:e48508. doi: 10.7554/eLife.48508 (PMC6824842; doi:10.7554/eLife.48508)
Supplement: Figure 3—figure supplement 4—source data 1. — Raw data: droplet area (in μm2) vs survival rate for solitary P. fluorescens, solitary P. putida. [file elife-48508-fig3-figsupp4-data1.xlsx]

## Sheet: Figure 3 - Supplement 4 - Sourc
log10(min droplet area [um^2])	1.25	1.75	2.25	2.75	3.25	3.75	4.25
log10(max droplet area [um^2])	1.75	2.25	2.75	3.25	3.75	4.25	inf
p. fluorescens
mean survival	0.00171411	0.000149943	0	0.00383869	0.00365526	0.0061565	0.236633
Standard Error	0.000372077	5.42207e-05	0	0.00250954	0.00288381	0.0061565	0.0243591
p. putida
mean survival	0.00212086	0.00108681	0.0015813	0.00614243	0.0232731	0.148921	NaN
Standard Error	0.00134808	0.000254982	0.00016229	0.000734585	0.00534946	0.0790256	NaN

## Sheet: Fig 3 raw p fluorescens solitar
droplet_area	survival_rate
7364.12	0
33.7408	0
4.48	NaN
38.1952	0
16.5888	NaN
114.074	0
9.856	0
24.704	0
29.2096	0
69.6832	0
22.3232	NaN
162.893	0
47.7184	0
54.2976	0
72.3712	0
58.112	0
63.5648	0
71.168	0
47.872	0
53.6576	0
44.8512	0
61.1328	0
75.2128	0
74.2144	0
90.8288	0
56.32	0
67.3536	0
57.216	0
84.8896	0
78.08	0
58.7264	0
107.315	0
62.4384	0
44.9024	0
61.9264	0
65.4848	0
77.3376	0
42.4192	0
59.3664	0
47.1552	0
53.6064	0
54.912	0
106.086	0
48.9984	0
33.7408	0
61.696	0
147.994	0
115.149	0
74.7008	0
8.1152	NaN
72.9088	0
58.4704	0
57.4208	0
60.288	0
37.6832	0
9.2928	NaN
61.2096	0
79.1808	0
456.678	0
244.582	0
124.774	0
55.68	0
67.8144	0
53.9136	0
53.2736	0
50.304	0
66.4832	0
91.9552	0
83.6096	0
77.3632	0
48.384	0
19.072	NaN
165.018	0
75.6992	0
74.4192	0
75.8272	0
89.216	0
45.3376	0
78.8736	0
69.8624	0
125.21	0
57.6	0
81.5104	0
219.776	0
118.349	0
73.344	0
64.512	0
87.9616	0
106.957	0
90.88	0
68.8384	0
506.01	0
46.9504	0
56.7808	0
74.6752	0
75.4176	0
64.4096	0
59.904	0
80.8192	0
76.1856	0
58.7264	0
56.6528	0
54.0672	0
56.1664	0
52.096	0
69.8112	0
78.8736	0
64.2304	0
49.9456	0
49.152	0
81.6896	0
74.88	0
51.8656	0
102.682	0
48.896	0
70.3232	0
47.0272	0
62.0032	0
69.8368	0
70.4256	0
53.8624	0
83.6352	0
58.1888	0
132.352	0
61.696	0
48.6912	0
64.128	0
81.28	0
49.536	0
106.752	0
56.2432	0
59.7504	0
43.9552	0
71.9872	0
122.291	0
55.04	0
53.1968	0
58.9056	0
75.5456	0
63.6416	0
53.3504	0
69.5552	0
123.085	0
54.2208	0
76.5184	0
74.9824	0
158.387	0
73.6	0
59.5968	0
78.208	0
81.024	0
105.318	0
7.296	NaN
3.6864	NaN
91.5456	0
65.408	0
87.2448	0
70.2208	0
45.2864	0
93.6704	0
141.338	0
67.8656	0
146.918	0
62.8992	0
42.24	0
72.448	0
70.4256	0
64.6144	0
58.496	0
52.1216	0
55.8336	0
114.355	0
75.8784	0
55.7568	0
75.008	0
95.3344	0
70.912	0
253.67	0
106.778	0
3.8656	NaN
72.1408	0
51.456	0
52.736	0
62.4384	0
79.1296	0
53.7344	0
96.4096	0
92.544	0
55.552	0
40.1408	0
58.4192	0
86.6048	0
72.4736	0
15.8976	NaN
62.592	0
55.2448	0
51.2256	0
65.536	0
107.776	0
40.4736	0
227.533	0
51.4816	0
61.2864	0
72.1152	0
70.6304	NaN
55.6288	0
72.064	0
60.1856	0
108.314	0
100.019	0
55.9872	0
101.197	0
65.2032	0
54.656	0
70.528	0
57.856	0
6.1184	NaN
62.8992	0
73.856	0
2.688	NaN
53.5808	0
88.448	0
70.7328	0
59.3664	0
70.9632	0
50.7648	0
59.3664	0
46.9248	0
68.224	0
61.2864	0
16.384	NaN
52.8128	0
62.7456	0
43.0592	0
123.341	0
54.2976	0
6.7072	NaN
3.072	NaN
5.7856	NaN
6.8096	NaN
6.2464	NaN
62.848	0
91.4176	0
78.5408	0
70.4768	0
36.5824	NaN
173.235	0
49.792	0
106.24	0
58.5984	0
39.0656	0
59.1872	0
60.288	0
26.752	0
58.0864	0
72.0128	0
39.7312	0
75.2896	0
71.1168	0
58.0096	0
200.858	0
45.9008	0
42.0352	0
62.4896	0
53.12	NaN
43.008	NaN
74.0608	0
57.3952	0
44.5952	NaN
2.8928	NaN
50.3296	0
66.7648	0
155.085	0
110.464	0
84.8128	0
48.4096	0
65.6128	0
503.885	0
67.072	0
103.834	0
68.6592	0
85.6832	0
87.3728	0
54.5792	0
119.194	0
65.7152	0
6.6816	NaN
52.8896	0
58.6496	0
6.9632	NaN
44.9024	0
57.8304	0
7.5264	NaN
6.7584	NaN
73.4976	0
65.5872	0
5.3248	NaN
60.16	0
106.906	0
55.808	0
62.3104	0
55.7056	0
74.1632	0
48.9984	0
65.92	0
44.1856	0
44.1088	0
61.6448	0
87.4496	0
44.5696	0
54.8096	0
131.686	0
60.8	0
84.736	0
57.1904	0
82.6112	0
49.3312	0
19.5072	NaN
102.221	0
76.9792	0
175.155	0
50.3552	0
71.8336	0
12.5184	0
123.904	0
80.9216	0
64.128	0
146.918	0
56.6016	0
66.304	0
53.7088	0
66.5856	0
43.8784	0
198.451	0
52.7104	0
78.7456	0
91.1872	0
77.1328	0
79.1552	0
69.8368	0
5.2736	NaN
50.0736	0
97.8176	0
102.63	0
625.715	0
50.0224	0
61.4912	0
94.592	0
61.5424	0
31.2832	0
68.1472	0
262.605	0
22.9376	0
57.0368	0
57.856	0
36.5824	0
148.557	0
70.4256	0
66.3552	0
219.597	0
63.36	0
3.6352	NaN
55.6544	0
45.568	0
46.3104	0
48.5888	0
59.1872	0
70.3744	0
71.4752	0
69.248	0
46.7968	0
104.115	0
45.696	0
17.3824	NaN
57.9328	0
75.6736	0
69.0944	0
253.03	0
10.6752	0
110.208	0
67.1488	0
209.152	0
70.3744	0
49.6384	0
112.384	0
50.2784	0
62.2848	0
44.7232	0
52.736	0
66.0992	0
35.7632	0
56.5504	0
31.872	0
59.6224	0
78.1312	0
103.373	0
58.9312	0
54.8352	0
91.2384	0
62.5408	0
58.5472	0
53.4784	0
78.848	0
63.6672	0
127.77	0
50.048	0
61.9264	0
57.8304	0
43.904	0
3.9424	NaN
13.3376	NaN
49.9968	0
69.5808	0
65.92	0
53.6832	0
98.3296	0
51.1744	0
52.224	0
53.4784	0
48.1792	0
59.8016	0
208.333	0
64.9984	0
73.1904	0
86.8608	0
50.3552	0
54.016	0
55.0656	0
68.7616	0
76.2368	0
50.9184	0
49.8688	0
82.6624	0
59.6736	0
67.0976	0
47.9232	0
139.802	0
89.5232	0
16.896	NaN
101.248	0
78.3616	0
52.352	0
44.0832	0
82.4832	0
74.0608	0
106.189	0
56.2688	0
43.4176	0
46.7456	0
75.2128	0
82.5088	0
51.8912	0
114.099	0
59.4944	0
66.0224	0
85.7856	0
52.0448	0
74.1632	0
97.792	0
273.28	0
52.8896	0
77.6704	0
54.9632	0
43.0848	0
64.4608	0
50.9696	0
61.0048	0
48.8448	0
470.963	0
7.2448	NaN
70.9888	0
33.8688	0
144.026	0
33.5616	0
51.3024	0
64.1536	0
42.4704	0
85.76	0
104.397	0
79.3088	0
80.3328	0
57.1136	0
50.7904	0
72.0384	0
61.5424	0
38.5024	0
32.5376	0
98.9952	0
37.0176	0
3175.01	0.0532506
58.6496	0
56.192	0
34.6112	0
50.8928	0
226.125	0
733.67	0
70.8352	0
3.7376	NaN
76.8768	0
66.4064	0
15.616	0
65.9712	0
80.8448	0
17.1264	NaN
46.464	0
22.784	0
84.3008	0
70.9632	0
560	0
62.9248	0
71.296	0
166.426	0
49.152	0
456.986	0
68.1216	0
135.322	0
92.0064	0
33.792	0
64.9984	0
59.4432	0
63.6672	0
67.1488	0
100.454	0
41.7792	0
36.4032	0
58.5984	0
66.2272	0
150.4	0
40.9088	0
79.104	0
121.984	0
53.6832	0
46.72	0
80.6656	0
31.6928	0
57.0112	0
16.5888	0
87.1424	0
22.9376	0
71.168	0
48.8448	0
56.4992	0
60.8512	0
46.9504	0
96.6912	0
29.312	NaN
34.8672	0
18.1248	0
31.2576	0
98.3552	0
48.8448	0
63.6928	0
394.65	0
52.4544	0
232.627	0
78.2592	0
64.4096	0
64.4864	0
7.8336	NaN
50.688	0
42.5984	0
208.384	0
63.7696	NaN
132.582	0
21.632	0
22.5792	NaN
61.568	0
46.0544	0
79.5904	NaN
62.8736	0
46.5664	0
50.6112	0
41.5744	0
17.2288	0
66.7648	0
166.144	0
68.1984	0
24.4992	0
41.0112	0
109.286	0
78.2592	0
48.0512	0
348.058	0
93.5424	0
49.5104	0
51.8912	NaN
12.8	NaN
28.0576	NaN
80.512	0
62.0544	0
66.6624	0
16.7424	NaN
70.2976	0
62.4896	0
69.0688	0
34.9952	0
53.8112	0
122.547	0
30.6176	0
92.8	0
35.0208	0
55.3216	0
16.768	0
55.8592	0
18.4576	NaN
4.1216	NaN
52.6592	0
67.9936	0
122.086	0
88.9088	0
51.8144	0
59.7504	0
67.456	0
98.6112	0
169.165	0
110.208	0
74.4448	0
169.626	0
73.7024	0
52.5056	0
308.506	0
42.9568	0
64.6144	0
51.584	0
76.3648	0
48.9984	0
49.4592	0
46.4384	0
63.6928	0
60.3136	0
71.1936	0
87.4752	0
3.6352	NaN
7.1424	NaN
5.504	NaN
82.8416	0
2.6368	NaN
6.8608	NaN
5.7088	NaN
78.3104	0
48.7424	0
80.6912	0
53.8368	0
65.8944	0
41.6256	0
61.0304	0
42.496	0
16.8704	NaN
40.3456	0
59.904	0
65.0752	0
121.293	0
83.8656	0
48.5632	0
91.648	0
55.7568	0
55.9616	0
75.4944	0
57.8816	0
70.9376	0
102.835	0
74.5216	0
125.773	0
51.0976	0
202.854	0
55.808	0
49.536	0
106.01	0
60.3392	0
60.16	0
27.6992	0
51.712	0
67.8912	0
62.208	0
56.2944	0
65.28	0
54.2208	0
62.976	0
62.7456	0
64.0512	0
53.2224	0
43.8272	0
73.2672	0
51.2768	0
152.909	0
70.9376	0
7.4496	NaN
6.7584	NaN
6.656	NaN
6.912	NaN
6.7072	NaN
49.792	0
58.2656	0
85.2992	0
68.6336	0
46.8992	0
59.0336	0
87.7824	0
67.584	0
145.894	0
52.7104	0
75.2128	0
62.3872	0
51.6096	NaN
75.7248	0
75.4432	0
51.5072	0
67.84	0
70.0928	0
63.1296	0
49.7408	0
54.2208	0
28.9024	0
86.2976	0
66.5088	0
77.9776	0
10.9312	0
55.5776	0
63.8976	0
18.4576	NaN
93.2864	0
25.8816	0
90.3424	0
59.4688	0
53.12	0
60.288	0
82.4576	0
18.7904	NaN
58.7264	0
51.9936	0
69.8624	0
77.7216	0
86.0928	0
46.6944	0
65.5104	0
50.3808	0
141.952	0
34.1504	0
114.944	0
47.0272	0
37.0432	0
99.6608	0
42.1888	0
70.1696	0
51.8656	0
46.5408	0
68.9408	0
54.4	0
53.5808	0
137.651	0
63.5648	0
43.9552	0
52.4032	0
30.6688	0
60.5184	0
61.2352	0
135.731	0
46.0032	0
39.0656	0
70.144	0
259.661	0
57.4464	0
109.491	0
62.2336	0
77.568	0
83.5328	0
3.3792	NaN
57.216	0
33.0752	0
41.5744	0
29.0048	0
54.7328	0
111.002	0
44.2624	0
55.168	0
93.7984	0
64.3584	0
74.9824	0
48.0768	0
55.1168	0
79.7952	0
57.2928	0
75.9552	0
31.6672	0
44.2624	0
62.8736	0
233.37	0
102.554	0
60.1088	0
69.4528	0
62.6432	0
43.008	0
147.174	0
59.9552	0
61.8752	0
58.4192	0
61.1584	0
52.1472	0
48.3584	0
52.8384	0
177.101	0
48.0768	0
13.0048	0
99.1232	0
155.213	0
10.24	NaN
20.9408	0
56.7808	0
125.85	0
59.904	0
93.7472	0
106.573	0
45.8752	0
49.6128	0
114.714	0
58.4704	0
57.216	0
69.8368	0
55.2192	0
57.344	0
33.4848	NaN
63.36	0
73.1648	0
60.8768	0
42.9056	0
111.872	0
241.306	0
46.6432	0
64.6912	0
30.0032	0
62.08	0
48.6144	0
9.4976	NaN
100.813	0
82.432	0
58.8288	0
11.9552	NaN
105.216	0
124.595	0
122.854	0
105.165	0
122.214	0
46.5408	0
75.9552	0
39.04	0
37.8112	0
254.054	0
86.8096	0
49.1776	0
65.7152	0
60.0064	0
77.824	0
49.8432	0
68.5056	0
73.4464	0
3.456	NaN
30.8224	0
50.0736	0
13.2352	0
63.3088	0
57.1904	0
71.2448	0
46.4128	0
18.688	0
69.2736	0
52.1472	0
135.962	0
98.56	0
81.3824	0
65.2032	0
52.7104	0
67.1744	0
127.104	0
62.0032	0
59.4944	0
75.0848	0
69.9904	0
79.7184	0
61.1072	0
22.6304	0
104.474	0
53.9904	0
69.6064	0
8.4992	NaN
38.7584	0
83.7376	0
73.8816	0
69.7856	0
130.099	0
72.832	0
87.3984	0
61.7728	0
157.133	0
78.1312	0
50.7136	0
61.5168	0
54.528	0
61.184	0
74.88	0
76.1344	0
121.856	0
68.9408	0
74.368	0
88.0384	0
47.9744	0
45.2864	0
49.152	0
117.35	0
40.3968	0
110.387	0
121.19	0
79.2576	0
97.0496	0
50.2528	0
61.8752	0
61.2096	0
25.344	0
70.1952	0
41.9584	0
41.3696	0
54.7072	0
36.5056	0
50.7136	0
58.8288	0
66.0736	0
168.499	0
98.688	0
237.67	0
53.4016	0
134.477	0
52.48	0
70.1184	0
53.2224	0
43.0592	0
82.6112	0
74.24	0
104.909	0
82.0736	0
172.595	0
72.8576	0
80.9728	0
26.112	0
62.6688	0
78.0032	0
77.568	0
56.1152	0
114.202	0
72.9344	0
65.0496	0
100.378	0
127.36	0
88.9088	0
59.6736	0
36.1216	0
68.2752	0
67.7888	0
63.488	0
88.1408	0
50.6624	0
100.275	0
61.9264	0
128.589	0
63.0784	0
96.6656	0
167.04	0
80.7168	0
57.1904	0
69.0944	0
94.2592	0
89.344	0
56.2432	0
54.912	0
57.5488	0
51.5328	0
265.267	0
78.0288	0
109.158	0
50.2016	0
295.603	0
83.9424	0
54.2976	0
30.2336	0
52.7104	0
74.3168	0
49.536	0
81.664	0
95.4368	0
51.6864	0
83.2512	0
61.8752	0
141.926	0
68.1472	0
69.12	0
1788.54	0
124.902	0
68.4032	0
57.728	0
55.1424	0
47.7184	0
72.96	0
79.6416	0
65.2544	0
40.832	0
38.0928	0
120.09	0
470.758	0
31.4624	0
60.3904	0
49.3824	0
72.0896	0
50.8672	0
115.507	0
60.6976	0
71.8336	0
72.0896	0
52.096	0
660.557	0
66.8416	0
61.9264	0
32.9472	0
190.746	0
131.891	0
73.1136	0
67.3536	0
10.24	NaN
270.029	0
1717.63	0
52.992	0
27.5968	0
41.6	0
50.0992	0
59.136	0
36.8128	0
49.9968	0
32.9728	0
70.7072	0
59.6224	0
62.8736	0
101.965	0
74.24	0
52.2496	0
100.506	0
184.986	0
31.8976	0
90.368	0
27.2384	0
238.131	0
65.0752	0
55.4752	0
116.403	0
55.1168	0
47.0784	0
85.4528	0
59.1104	0
89.8304	0
56.2944	0
38.8608	0
62.2336	0
49.7152	0
52.1472	0
74.496	0
31.6416	0
39.0912	0
70.5792	0
62.592	0
109.798	0
83.8912	0
130.355	0
48.8448	0
71.0656	0
128.179	0
46.4384	0
66.9184	0
79.8208	0
82.5856	0
70.5536	0
17.7664	0
331.443	0
2.6368	NaN
75.9552	0
38.3488	0
5.2736	NaN
6.7584	NaN
5.4272	NaN
7.1424	NaN
108.698	0
48.2304	0
6.6816	NaN
128.051	0
68.9664	0
55.8592	0
28.8768	0
46.2848	0
109.798	0
65.9456	0
34.7392	0
112.998	0
102.656	0
60.1344	0
44.032	0
34.816	0
46.8736	0
71.6544	0
198.298	0
61.2352	0
48.4352	0
82.8672	0
71.7824	0
46.592	0
43.7248	0
66.6368	0
206.899	0
41.0624	0
122.829	0
59.9296	0
399.206	0
71.9104	0
345.498	0
87.2192	0
59.392	0
27.1872	0
151.526	0
61.0816	0
61.056	0
66.4064	0
60.8768	0
70.9632	0
42.3936	0
46.5152	0
176.154	0
33.8432	0
49.28	0
64.768	0
36.224	0
64.1536	0
76.9024	0
55.9104	0
27.008	0
42.7776	0
628.352	0
48.9216	0
71.2704	0
60.4928	0
57.088	0
70.3232	0
47.232	0
51.6096	0
28.4672	0
29.7728	0
46.08	0
43.1872	0
24.8576	0
93.2608	0
137.882	0
30.3616	0
132.992	0
87.808	0
23312.5	0.185666
54.8864	0
54.9376	0
62.9248	0
26.5472	0
84.7872	0
67.8656	0
62.72	0
99.5584	0
22.5536	0
37.4272	0
7.0656	NaN
59.136	0
58.9312	0
6.656	NaN
7.1936	NaN
5.8624	NaN
6.3488	NaN
46.4384	0
25.9072	0
28.3904	0
76.4672	0
80.4608	0
40.448	0
67.0976	0
22.528	0
77.568	0
44.3392	0
23.7312	0
61.3888	0
47.8208	0
100.301	NaN
182.093	0
76.288	0
118.989	0
39.2192	0
71.296	0
81.28	0
17.6896	0
74.88	0
38.8096	0
209.997	0
469.12	0
64.3072	0
67.6352	0
48.0768	0
2.8928	NaN
54.6048	0
112.896	0
45.3376	0
66.6624	0
75.9552	0
64.4352	0
112.922	0
33.792	0
25.1904	0
51.5072	0
22.6048	0
33.152	0
27.8528	0
11.3664	0
66.944	0
183.347	0
73.984	0
78.2336	0
97.7152	0
25.472	0
30.4896	1
122.803	0
51.5328	0
6.3744	NaN
53.8112	0
52.1472	0
55.0656	0
55.9104	0
74.3168	0
39.3728	0
45.1584	0
62.976	0
62.5152	0
87.808	0
146.15	0
90.4448	0
59.904	0
856.32	0
66.2016	0
74.6496	0
47.1296	0
38.3488	0
45.2864	0
31.9744	0
64.896	0
60.8256	0
18.3808	NaN
29.4144	0
79.2064	0
77.056	0
96.896	0
190.822	0
201.907	0
41.856	0
74.496	0
102.067	0
50.048	0
21.1968	0
64.4096	0
84.4544	0
51.6608	0.0803571
81.0752	0
31.9232	0
129.51	0
120.96	0
44.5696	0
68.4544	0
56.2944	0
70.5024	0
105.267	0
99.968	0
434.33	0
41.6768	0
117.939	0
146.483	0
30.1312	0
46.5408	0
54.5792	0
67.2	0
21.8368	0
83.8912	0
41.5488	0
96.0256	0
60.3136	0
55.0656	0
67.5072	0
47.2064	0
47.0272	0
50.8416	0
131.354	0
27.0592	0
82.8416	0
126.592	0
124.032	0
47.9232	0
52.8128	0
74.1632	0
51.328	0
77.8752	0
46.4896	0
80.9984	0
67.2512	0
63.9744	0
64.896	0
57.9072	0
55.7056	0
42.9312	0
56.8832	0
78.9504	0
11.4688	NaN
62.4896	0
74.8032	0
59.8528	0
72.832	0
65.2288	0
69.248	0
87.9616	0
139.034	0
58.6496	0
46.208	0
167.526	0
72.1408	0
32.768	0
60.2112	0
65.4848	0
103.757	0
37.4016	0
61.3888	0
53.5296	0
57.4208	0
15.744	0
70.6304	0
33.2288	0
50.2528	0
77.8496	0
63.3088	0
86.7072	0
91.8272	0
59.0848	0
719.13	0.243386
71.0144	0
50.9696	0
64.7168	0
58.5728	0
48.4096	0
62.3616	0
45.0048	0
58.24	0
86.1184	0
66.3808	0
19.328	0
80.9216	0
60.8	0
71.3984	0
85.632	0
57.8304	0
152.346	0
35.6096	0
119.27	0
29.8752	0
56.4992	0
19.9936	NaN
53.7344	0
65.5616	0
27.392	0
72.064	0
81.4848	0
30.2848	0
89.4208	0
78.9504	0
52.8896	0
47.6416	0
23.3472	NaN
160.026	0
58.5984	0
63.5648	0
48.6144	0
69.0688	0
78.9504	0
120.294	0
60.9536	0
39.8592	0
64.128	0
48.4352	0
80.8448	0
74.5472	0
54.6816	0
48.768	0
28.5696	0
63.1552	0
60.6208	0
46.9248	0
49.28	0
57.1904	0
64.2304	0
65.92	0
45.2352	0
83.4304	0
65.8944	0
69.376	0
52.1728	0
70.784	0
44.1856	0
50.816	0
55.7312	0
38.7584	0
33.024	0
58.496	0
137.114	0
74.24	0
66.5344	0
57.2928	0
115.789	0
72.704	0
90.3936	0
12.5952	NaN
62.976	0
45.7728	0
103.27	0
64.7168	0
12.928	NaN
61.824	0
51.5584	0
54.0416	0
61.7984	0
51.328	0
62.6432	0
67.5584	0
49.9456	0
51.1488	0
2.9184	NaN
5.1456	NaN
49.0752	0
52.9664	0
54.7072	0
63.2832	0
69.1712	0
164.275	0
40.6016	0
70.7328	0
43.776	0
73.344	0
104.32	0
41.6512	0
37.4528	0
1539.25	0
57.5744	0
50.8672	0
61.2864	0
64.5888	0
57.8048	0
114.099	0
62.8224	0
87.6032	0
16.5632	0
62.3104	0
61.4144	0
138.778	0
59.5968	0
55.6288	0
84.5568	0
64.9984	0
77.1072	0
60.5696	0
117.402	0
60.8512	0
151.347	0
41.5744	0
72.2176	0
99.9936	0
91.008	0
60.0576	0
152.422	0
89.2416	0
66.8416	0
206.182	0
76.5696	0
116.531	0
50.5344	0
64.256	0
110.106	0
94.9248	0
59.8784	0
39.8848	0
73.728	0
55.7824	0
54.3232	0
80.768	0
47.9232	0
50.0224	0
52.5824	0
671.283	0
49.9456	0
3.6608	NaN
49.6896	0
88.448	0
51.456	0
41.2416	0
61.8752	0
49.2288	0
49.28	0
108.416	0
65.1008	0
33.792	0
54.784	0
65.6128	0
126.566	0
27.0336	0
45.9264	0
51.968	0
48.9728	0
73.1648	0
155.136	0
48.384	0
116.864	0
44.2368	0
137.139	0
43.2384	0
94.0288	0
73.2416	0
16.4864	0
191.667	0
47.9232	0
38.1952	0
87.0912	0
91.3152	0
73.5232	0
112.282	0
45.0816	0
88.6016	0
284.416	0
12.928	0
15.9488	0
68.3776	0
4.0448	NaN
7.6032	NaN
69.9904	0
66.4576	0
51.4304	0
18.5856	0
64.8704	0
137.139	0
121.216	0
84.5824	0
141.338	0
68.352	0
28.3392	0
91.4944	0
51.4048	0
107.11	0
16.2816	0
15.232	NaN
41.6768	0
112.486	0
136.218	0
13.3376	NaN
245.478	0
44.0832	0
139.853	0
52.9152	0
31.744	0
668.442	0
19.7888	0
83.072	0
34.816	0
21.0176	0
47.744	0
496.384	0
96.2304	0.283394
60.3904	0
37.8624	0
45.5424	0
46.6432	0
49.3312	0
72.4736	0
61.8752	0
63.2064	0
28.0832	0
63.0016	0
34.1504	0
53.4528	0
98.2016	0
389.171	0
83.9424	0
67.968	0
135.987	0
53.5808	0
660.915	0.102011
44.0832	0
63.6672	0
78.08	0
189.133	0
48.0768	0
41.3952	0
31.8976	0
70.4256	0
22.2976	0
59.7504	0
32.8192	0
153.062	0
55.6032	0
56.0384	0
94.9248	0
116.326	0
399.514	0
412.288	0
63.9232	0
17.92	NaN
17.408	0
18.816	0
58.5472	0
8.3456	0
25.6768	0
56.96	0
75.2128	0
54.2976	0
12.9536	0
67.2	0
99.3024	0
2.8672	NaN
47.9488	0
52.3776	0
86.5792	0
13.8752	0
42.9056	0
1734.12	0
15.0784	0
36.096	0
7.0144	0
76.3648	0
47.3856	0
67.0208	0
49.8688	0
62.464	0
361.267	0
4.3264	NaN
9.856	0
46.7712	0
75.8016	0
51.7888	0
604.902	0
117.555	0
60.3648	0
5.1968	NaN
61.2608	0
95.8976	0
57.8816	0
3.2	NaN
18539.4	0.22123
6.6816	NaN
38.0928	0
5.632	NaN
5.6064	NaN
6.784	NaN
36.8128	0.2
5.9904	NaN
31.3088	0
95.4624	0
58.5216	0
47.1296	0
28.4928	0
17.6896	0
49.152	0
49.6896	0
109.67	0
68.2496	0
148.506	0
90.8032	0
8.3712	NaN
22.0928	0
15.4112	0
91.4944	0
42.1888	NaN
24.448	0
64.3072	0
47.7184	0
60.3136	0
175.181	0
50.5856	NaN
24.064	0
37.504	0
74.0608	0
51.4304	0
81.7664	0
15.7696	0
30.5664	0
55.9872	0
99.2768	0
115.379	0
27.5712	0
68.224	0
28.1856	0
69.6832	0
41.2672	0
29.568	0
38.6816	0
65.024	0
65.3568	0
71.6544	0
45.5424	0
66.56	0
33.4336	0
62.6176	0
148.992	0
69.1712	0
58.112	0
80.9984	0
38.2464	0
80.6144	0
60.9792	0
62.2336	0
7.6288	NaN
95.0528	0
33.1776	0
18.6112	0
66.0224	0
59.3664	0
47.4368	0
3.6352	NaN
20.0704	NaN
51.5328	0
77.9776	0
39.552	0
67.1232	0
7.0656	NaN
6.784	NaN
87.9104	0
7.0912	NaN
84.1472	0
6.6816	NaN
32.384	0
230.246	0
50.8416	0
65.8432	0
13.4144	0
69.9392	0
213.299	0
37.7088	0
103.322	0
64.4608	0
76.0576	0
49.8176	0
80.8192	0
53.4272	0
82.5856	0
64.1024	0
52.0704	0
34.2272	0
129.894	0
100.07	0
181.222	0
79.6672	0
77.7984	0
71.2192	0
34.432	0
28.3648	0
107.904	0
40.7296	0
986.214	0
63.4368	0
280.576	0
17.5872	NaN
50.3552	0
55.3984	0
57.3184	0
62.5152	0
373.222	0
106.47	0
120.243	0
111.232	0
39.7568	0
73.9328	0
81.5872	0
38.4256	0
49.024	0
61.8752	0
57.984	0
34.2784	0
48.2304	0
67.8144	0
58.8544	0
63.1296	0
63.6416	0
89.2672	0
60.8256	0
12.7744	NaN
229.043	0
104.013	0
80.4096	0
4.5824	NaN
52.7104	0
120.422	0
62.6944	0
66.2272	0
22.8352	0
58.1632	0
69.2992	0
9.9584	NaN
64.3328	0
777.267	0
110.49	0
48.5888	0
37.4272	0
4.4544	NaN
85.632	0
148.454	0
59.9296	0
62.8224	0
110.438	0
35.584	0
64.896	0
49.7408	0
105.856	0
130.253	0
127.155	0
22.6048	0
61.6192	0
40.5504	0
48.6656	0
3.8912	NaN
52.1984	0
120.397	0
23.0912	0
3.8912	NaN
65.2032	0
49.7152	0
85.8624	0
62.3616	0
91.7504	0
2.944	NaN
104.141	0
1456.54	0
6.3488	NaN
78.1568	0
30.08	0
78.848	0
70.8608	0
66.2272	0
64.3328	0
37.0688	0
141.901	0
466.048	0
3281.31	0
45.1328	0
23.8848	0
36.2752	0
72.5504	0
57.216	0
61.3888	0
73.728	0
80.3584	0
146.253	0
7.168	0
32.7424	0
121.882	0
34.9952	0
58.0096	0
63.0528	0
44.544	0
45.1328	0
39.7056	0
52.352	0
28.8512	0
139.162	0
75.904	0
37.9648	0
14.208	NaN
41.4208	0
114.867	0
5.1456	NaN
72.832	0
66.2272	0
65.8944	0
31.4624	0
27.5968	0
86.7584	0
63.2064	0
6.0928	NaN
54.7328	0
97.1776	0
23.2704	0
68.608	0
39.04	0
56.832	0
35.6352	0
193.69	0
55.6288	0
77.1584	0
30.976	0
35.9424	0
51.6864	0
45.6192	0
34.7648	0
21.632	0
117.581	0
116.326	0
24.9344	0
35.328	0
68.7872	0
39.552	0
56.9088	0
63.0272	0
10.4448	NaN
25.8048	0
104.883	0
67.0208	0
108.109	0
42.0352	0
433.997	0
55.5008	0
46.1568	0
53.8368	0
18.816	NaN
54.0928	0
8.32	NaN
70.6816	0
40.7808	0
21.888	NaN
11.4176	0
47.6416	0
46.3616	0
54.4	0
45.9776	0
35.6352	0
20.352	0
69.1456	0
30.848	0
183.859	0
111.795	0
68.4032	0
98.8928	0
70.3232	0
26.2656	0
76.1856	0
65.8688	0
23.8592	0
37.4016	0
96.6144	0
54.6048	0
45.44	0
26.5216	NaN
73.3184	0
1406.28	0
8.8832	0
63.1552	0
74.1376	0
269.952	0
7.3984	NaN
71.3472	0
64.5632	0
59.5456	0
159.718	0
84.1984	0
451.302	0
96.896	0
64.3584	0
151.117	0
22.1952	0
72.0128	0
35.2512	0
3.3536	NaN
26.3936	0
33.3312	0
50.7392	0
104.73	0
177.894	0
53.6832	0
56.064	0
31.0016	0
7.2704	NaN
47.9232	0
23.8336	0
4.1216	0
66.5344	0
58.6496	0
70.0672	0
60.032	0
69.8368	0
191.155	0
6.784	NaN
55.5008	0
28.9024	0
174.08	0
59.3152	0
29.7728	0
49.2032	0
81.152	0
114.765	0
60.5952	0
53.632	0
4.48	NaN
28.0832	NaN
32.5888	0
22.528	0
32.9728	0
[truncated: 19,098 more rows]

## Sheet: Fig 3 raw p putida solitary
droplet_area	survival_rate
3826.25	0.00346957
116.838	0
51.328	0
86.3744	0
158.592	0
173.696	0
103.885	0
103.91	0
22.912	0
187.776	0
167.706	0
120.141	0
7.8592	NaN
136.346	0
50.688	0
179.917	0
18.8672	0
76.4928	0
9.856	0
60.6464	0
121.728	0
21.4272	0
76.5696	0
77.2864	0
57.2672	0
110.106	0
36.4032	0
51.7632	0
125.594	0
99.2512	0
64.2816	0
68.48	0
76.032	0
74.112	0
6.272	0
60.5696	0
108.211	0
23.5008	0
93.7216	0
10.6496	0
69.8368	0
56.832	0
138.317	0
58.6752	0
188.365	0
52.992	0
34.6624	0
102.682	0
43.4432	0
113.792	0
191.232	0
118.861	0
19.1488	0
110.976	0
139.034	0
75.5968	0
141.261	0
278.349	0
205.005	0
3.0464	0
58.5728	0
157.747	0
22.5024	0
42.6752	0
131.635	0
24.7552	0
47.8208	0
157.491	0
28.4672	0
48.9216	0
58.9312	0
126.029	0
120.192	0
43.1616	0
16.7168	NaN
68.48	0
187.725	0
112.64	0
36.0192	0
80.896	0
25.9584	0
43.0848	0
47.7952	0
38.4768	0
44.2368	0
164.045	0
194.406	0
122.214	0
181.632	0
73.5744	0
160.589	0
126.72	0
128.845	0
30.08	0
6.7328	0
9.472	NaN
70.9632	0
64.4096	0
132.531	0
61.4912	0
63.8464	0
24.7552	0
40.2688	0
12.8	0
52.1984	0
42.7008	0
57.8048	0
165.632	0
101.99	0
130.944	0
168.32	0
105.6	0
49.2288	0
16.7424	0
87.0144	0
136.832	0
157.645	0
33.1264	0
221.798	0
124.134	0
50.3296	0
127.232	0
167.245	0
136.371	0
151.168	0
42.24	0
176.282	0
103.706	0
144.41	0
201.062	0
101.632	0
4.0192	0
77.9264	0
92.5952	0
60.9536	0
44.3392	0
15.0528	0
173.005	0
152.858	0
4.7104	0
46.3104	0
39.9872	0
48.5632	0
69.2224	0
244.582	0
119.782	0
234.957	0
11.3152	0
57.6	0
93.4912	0
98.2784	0
3.5072	0
200.115	0
26.9824	0
49.2544	0
222.643	0
21.6064	0
10.9824	0
151.782	0
29.4912	0
117.35	0
40.2944	0
23.0912	0
124.211	0
134.016	0
97.9968	0
21.632	0
118.4	0
3.6352	0
100.454	0
199.654	0
9.6512	0
404.787	0
34.56	0
32.0256	0
148.122	0
181.837	0
354.867	0
14.1824	0
151.194	0
93.9264	0
45.568	0
103.885	0
72.9088	0
44.7488	0
94.4128	0
7.5008	0
6.7072	NaN
4.7104	NaN
168.653	0
129.485	0
35.6096	0
72.1408	0
75.3664	0
51.84	0
66.7392	0
12.928	0
81.408	0
114.074	0
60.672	0
170.854	0
65.9968	0
185.83	0
120.499	0
106.675	0
137.523	0
38.7584	0
156.339	0
261.325	0
169.165	0
57.0624	0
67.7632	0
65.2544	0
6.3232	0
25.1136	0
164.147	0
232.422	0
263.501	0
57.1392	0
61.1584	0
87.3472	0
18.1504	NaN
26.1632	0
132.122	0
144.051	0
103.194	0
43.4688	0
36.6848	0
165.453	0
41.7536	0
49.5616	0
112.973	0
195.2	0
133.862	0
147.174	0
27.1616	0
95.3856	0
166.17	0
120.858	0
188.902	0
105.702	0
118.016	0
181.914	0
79.0528	0
5.8624	0
127.821	0
4.736	0
291.712	0
75.6992	0
120.474	0
248.422	0
125.722	0
13.2096	NaN
79.4624	0
351.462	0.00862069
61.5424	0
13.2864	0
175.258	0
8.2176	0
75.136	NaN
132.634	0
47.104	0
101.248	0
51.9168	0
29.184	0
44.5696	0
85.0176	0
3.4816	0
29.1584	0
145.946	0
2.944	0
96.6144	0
1842.28	0.0123716
316.57	0
131.994	0
136.755	0
39.4496	0
43.3408	0
36.864	0
29.568	0
44.6976	0
151.859	0
898.099	0
47.616	0
37.376	0
301.901	0
59.904	0
184.141	0
12.5952	0
34.3296	0
56.4736	0
111.718	0
56.0384	0
173.363	0
63.1808	0
97.5616	0
99.9168	0
81.5872	0
82.7392	0
185.677	0
203.341	0
50.1248	0
102.886	0
45.824	0
188.186	0
89.4208	0
102.016	0
66.048	0
5.9392	0
11.6224	NaN
270.003	0
70.8096	0
177.28	0
93.568	0
134.17	0
186.752	0
6.016	0
28.3904	0
162.483	0
3.1488	NaN
158.131	0
59.3408	0
64.5376	0
162.227	0
155.699	0
81.3312	0
43.4176	0
51.9168	0
34.9952	0
121.242	0
112.87	0
9.344	0
32.4352	0
137.6	0
117.018	0
43.3664	0
261.658	0
147.686	0
117.53	0
4.6848	0
50.2016	0
6.0672	0
149.683	0
7.1936	0
199.142	0
132.326	0
28.2112	0
9.856	0
114.637	0
54.1184	0
130.79	0
16.0256	0
164.531	0
78.848	0
100.992	0
6.2208	NaN
227.686	0
142.541	0
35.5584	0
70.3232	0
134.067	0
30.336	0
127.642	0
37.5296	0
171.008	0
242.483	0
185.728	0
79.1808	0
1125.4	0.00457939
285.235	0
188.646	0
39.5008	0
87.8848	0
332.083	0
118.016	0
140.544	0
146.022	0
168.858	0
62.7712	0
174.797	0
194.099	0
115.584	0
56.5504	0
4.608	NaN
108.57	0
109.926	0
160.128	0
141.619	0
64.9472	0
218.112	0
148.941	0
93.4912	0
189.107	0
355.021	0
153.216	0
69.8624	0
151.45	0
4.5056	0
39.7056	0
191.155	0
107.622	0
44.288	0
134.579	0
8.4736	0
209.766	0
112.768	0
41.3952	0
15.4112	NaN
54.7072	0
271.437	0
86.8096	0
106.342	0
80.7424	0
95.7952	0
51.6352	0
204.39	0
29.8752	0
62.1568	0
4.608	NaN
57.1648	0
183.117	0
26.1376	0
47.9488	0
124.621	0
63.2576	0
218.573	0
144.41	0
97.408	0
214.554	0
194.509	0
2.7904	NaN
184.602	0
596.531	0
148.582	0
102.118	0
296.269	0
46.336	0
96.1024	0
252.237	0
141.67	0
122.496	0
37.12	0
149.914	0
249.19	0
309.069	0
218.035	0
134.758	0
51.5584	0
173.21	0
209.178	0
47.7184	0
9.7792	0
79.104	0
239.283	0
126.566	0
99.5328	0
158.054	0
19.5584	0
145.28	0
1670.84	0.00398201
100.685	0
160.307	0
151.68	0
58.0096	0
132.736	0
89.8304	0
160.922	0
33.3824	0
31.7696	NaN
163.328	0
155.674	0
115.277	0
49.9968	0
266.394	0
45.4144	0
518.554	0
53.1968	0
229.376	0
148.582	0
40.8832	0
36.4544	0
189.926	0
133.478	0
104.96	0
200.346	0.00601805
34.0224	NaN
33.9712	0
84.2752	0
67.3024	0
180.198	0
34.8416	0
395.725	0
157.466	0
236.749	0
28.8512	0
168.166	0
89.9584	0
157.645	0
140.16	0
162.202	0
291.2	0
126.822	0
75.904	0
1730.74	0.00494287
95.7696	0
4.9664	0
64.2816	0
3.1488	0
74.1632	0
152.806	0
75.5968	0
518.016	0
97.024	0
161.638	0
250.214	0
46.5408	0
118.323	0
68.5056	0
60.2624	0
124.416	0
279.501	0
48.2816	0
171.93	0
156.083	0
172.851	0
33.3824	0
114.509	0
45.9264	0
46.8224	0
124.493	0
15.8976	NaN
172.39	0
245.683	0
145.766	0
17.408	0
59.4432	0
122.931	0
676.659	0
163.917	0
51.3792	0
57.2928	0
113.536	0
127.565	0
126.259	0
8.6016	0
106.854	0
71.8592	0
152.678	0
2720.72	0
36.1728	0
136.525	0
317.978	0
111.283	0
36.5312	0
44.8768	NaN
45.7216	0
130.739	0
194.739	0
258.893	0
28.416	0
43.0592	0
126.669	0
8.2432	NaN
156.774	0
153.728	0
71.5776	0
4.8384	0
309.914	0
169.011	0
155.52	0
112.717	0
162.458	0
146.688	0
205.875	0
184.422	0
112.512	0
40.9856	0
187.802	0
76.8256	0
175.309	0
26.1632	0
248.448	0
169.088	0
440.166	0
112.358	0
56.6784	0
129.638	0
38.272	0
35.3792	0
298.598	0
380.646	0
159.821	0
137.37	0
87.8336	0
147.456	0
54.272	0
250.266	0
209.69	0
105.651	0
221.696	0
874.547	0.00859176
64.9472	0
19.4304	0
165.504	0
116.838	0
68.3008	0
9.3184	NaN
135.219	0
75.52	0
129.741	0
69.5808	0
132.992	0
148.992	0
60.0576	0
887.142	0
227.328	0
48.4864	0
48.2816	0
243.712	0
59.1616	0
98.0224	0
42.0608	0
3.3792	NaN
154.931	0
45.2096	0
132.864	0
194.586	0
215.398	0
160.333	0
144.307	0
147.226	0
41.9072	0
126.362	0
23.5776	0
211.098	0
96.2816	0
15.5136	0
39.2704	0
153.216	0
84.4288	0
53.1712	0
67.3024	0
205.005	0
144.026	0
367.13	0
93.184	0
55.8848	0
103.603	0
220.365	0
237.568	0
40.9344	0
99.5328	0
115.738	0
18.9184	0
265.293	0
806.093	0.0102547
151.68	0
203.622	0
102.17	0
58.7264	0
157.696	0
127.437	0
160.768	0
170.957	0
238.566	0.03157
109.03	0
166.221	0
62.976	0
162.637	0
58.7264	0
170.342	0
74.0608	0
283.418	0
127.206	0
161.536	0
544.435	0
200.704	0
159.974	0
114.074	0
171.674	0
114.534	0
255.744	0
199.014	0
172.851	0
126.669	0
39.5008	0
149.018	0
144.691	0
216.653	0
276.378	0
373.274	0
413.619	0
128.819	0
167.194	0
106.931	0
357.76	0.012605
144.486	0
215.885	0
54.1184	0
46.4128	0
111.13	0
101.197	0
182.17	0
93.7216	0
9.8816	0
107.981	0
301.594	0.0276172
154.112	0
7.6032	NaN
3.456	NaN
625.075	0
153.779	0
198.502	0
119.04	0
146.33	0
61.7472	0
894.848	0
48.8192	0
133.837	0
223.13	0
345.318	0
20.864	NaN
172.672	0
166.963	0
118.733	0
141.978	0
61.2096	0
36.3264	0
52.3264	0
53.6064	0
164.838	0
18.2016	0
457.37	0
136.269	0
40.2432	0
73.1648	0
94.3616	0
121.933	0
398.95	0
254.438	0
392.32	0
103.168	0
115.2	0
36.7104	NaN
80.1792	0
166.963	0
477.286	0
32.4608	0
222.643	0
97.7408	0
124.262	0
234.291	0
36.5824	0
98.6112	0
61.7984	0
307.533	0
65.792	0
129.075	0
288.589	0
129.971	0
134.682	0
79.0784	0
180.07	0
137.651	0
215.168	0
75.4176	0
59.0848	0
19.6096	0
130.33	0
144.333	0
459.034	0
169.856	0
62.8992	0
152.294	0
53.1712	0
167.526	0
138.317	0
237.875	0
203.725	0
85.888	0
242.739	0
56.7552	0
581.402	0
507.187	0.0268972
183.398	0
128.973	0
114.765	0
4.1472	0
105.83	0
79.6928	0
223.718	0
209.946	0
38.8096	0
45.6192	0
147.61	0
420.992	0
315.136	0
227.814	0
33.8944	0
152.627	0
186.88	0
49.3824	0
101.734	0
58.9056	0
64.6144	0
127.616	0
43.5456	0
130.278	0
144.461	0
96.2816	0
120.653	0
209.997	0
55.552	0
54.272	0
162.406	0
37.4528	0
134.067	0
564.173	0
222.362	0
133.427	0
27.1872	0
99.2	0
111.642	0
49.5872	0
28.0832	NaN
88.6272	0
95.8976	0
212.454	0
104.346	0
61.6448	0
22.3744	0
107.571	0
375.91	0
43.392	0
157.824	0
234.854	0
24.0384	0
167.475	0
244.096	0
218.496	0
272.384	0
102.4	0
24.5504	0
310.656	0
197.094	0
623.821	0
66.6368	0
144.717	0
218.419	0
155.11	0
164.173	0
3.8144	0
89.5232	0
60.1088	0
133.939	0
33.8688	0
1100.9	0
89.4976	0
217.83	0
172.365	0
2.8672	NaN
401.152	0
126.541	0
173.978	0
67.2	0
31.488	0
76.4416	0
825.344	0
200.218	0
321.178	0
93.7984	0
231.706	0
182.656	0
48.9472	0
151.757	0
114.253	0
279.859	0
75.4176	0
27.52	NaN
65.4848	0
406.426	0
49.4848	0
288.589	0
179.507	0
243.866	0
148.122	0
166.758	0
153.626	0
168.653	0
168.73	0
314.982	0
40.5504	0
316.262	0
164.838	0
195.2	0
309.709	0
585.19	0
182.502	0
92.1856	0
162.714	0
146.79	0
142.054	0
133.837	0
2.8672	0
135.219	0
132.147	0
292.403	0
185.907	0
172.467	0
122.394	0
185.805	0
29.5424	0
70.912	0
479.667	0
212.429	0
137.114	0
128.896	0
279.424	0
282.01	0
75.5712	0
7.5264	NaN
423.859	0.027248
131.226	0
206.054	0
107.725	0
134.682	0
258.304	0
51.1232	0
557.696	0
59.2128	0
268.544	0
146.714	0
6.5792	NaN
8.4736	0
195.328	0
136.064	0
50.7392	0
401.254	0
69.248	0
11.8016	NaN
41.6	0
142.771	0
644.966	0
204.493	0
48.8704	0
193.05	0
437.786	0
170.778	0
156.57	0
235.443	0
131.072	0
188.518	0
9.1136	NaN
150.272	0
205.005	0
500.864	0
249.242	0
256.256	0.0405157
287.232	0
57.3184	0
106.624	0
139.955	0
156.032	0
153.267	0
187.648	0
39.68	0
85.1456	0
148.224	0
54.5024	0
184.269	0
118.963	0
97.8688	0
95.744	0
64.256	0
5.2736	0
265.165	0
74.2912	0
247.654	0
1191.4	0
117.888	0
130.176	0
53.5552	0
201.318	0
172.672	0
120.448	0
319.744	0
142.208	0
254.822	0
123.853	0
35.9936	0
32.768	0
118.554	0
242.995	0
141.133	0
109.21	0
29.568	0
555.008	0.0240506
487.245	0
49.408	0
112.947	0
156.134	0
142.054	0
51.0976	0
181.581	0
173.594	0
40.9856	0
100.813	0
85.4272	0
461.542	0
282.138	0
11.8016	0
3.328	0
268.416	0
446.694	0
317.286	0
322.15	0
170.445	0
64.7424	0
46.0288	0
483.712	0
8.2688	0
152.96	0
91.0336	0
33.536	NaN
85.2736	0
108.493	0
26.5472	0
119.142	0
210.714	0
179.405	0
155.162	0
3.9424	0
22.6816	0
180.378	0
142.438	0
127.846	0
256.384	0
130.227	0
125.286	0
59.1872	0
141.491	0
169.446	0
158.72	0
159.411	0
147.072	0
152.602	0
52.4544	0
255.258	0
128.563	0
174.131	0
179.61	0
523.187	0
97.024	0
350.106	0
196.992	0
60.8512	0
279.501	0
27.648	0
147.482	0
292.915	0
132.301	0
161.357	0
255.514	0
564.864	0
135.757	0
101.965	0
355.994	0.030896
153.139	0
80.5888	0
152.755	0
148.147	0
104.243	0
239.872	0
267.366	0
272.128	0
149.76	0
90.5216	0
179.456	0
139.52	0
353.894	0
85.632	0
195.149	0
37.0944	0
57.088	0
113.331	0
3.1744	0
165.862	0
201.19	0
618.214	0
39.1424	0
131.328	0
207.821	0
110.822	0
220.288	0
154.803	0
279.168	0
98.3296	0
200.755	0
50.0224	0
241.382	0
155.315	0
143.514	0
183.347	0
85.9392	0
202.291	0
75.776	0
423.526	0
110.925	0
205.082	0
55.9104	0
345.958	0.0544854
265.165	0
207.539	0
285.107	0
147.43	0
310.4	0
70.4256	0
122.163	0
30.6176	0
116.198	0
51.0976	0
126.234	0
222.413	0
244.173	0
150.938	0
9.4976	NaN
143.642	0
258.867	0
123.238	0
163.712	0
207.104	0
64.0768	0
173.926	0
210.406	0
230.246	0
87.3728	0
185.293	0
90.0864	0
513.459	0.0171133
141.491	0
330.675	0
121.498	0
214.042	0
197.837	0
126.566	0
6.784	0
87.9872	0
192.486	0
135.757	0
164.531	0
146.381	0
162.099	0
322.867	0.0171614
123.904	0
55.8848	0
215.757	0
161.766	0
53.0688	0
62.2592	0
164.762	0
35.328	0
33.536	0
122.752	0
109.235	0
106.112	0
27.8016	0
10.7776	NaN
53.4272	NaN
26.5472	0
42.6752	0
31.616	0
4.9408	NaN
32.8448	0
50.8928	0
47.9744	0
194.637	0
86.6048	0
403.507	0
28.6464	0
239.59	0
380.544	0
157.594	0
147.046	0
41.5232	0
297.984	0
4.352	NaN
142.413	0
31.6672	0
61.312	0
152.064	0
5087.44	0.00572065
271.232	0
4.9152	NaN
81.3056	0
424.218	0
270.822	0
131.251	0
125.44	0
60.16	0
196.454	0
380.288	0
147.046	0
138.701	0
238.157	0
287.002	0
64.6656	0
92.8	0
392.96	0
124.595	0
46.976	NaN
196.557	0
86.8864	0
53.6064	0
200.704	0
47.8464	0
406.579	0
147.994	0
651.29	0.00652681
105.677	0
103.782	0
315.29	0
524.186	0
336.282	0
64.8192	0
219.904	0
57.0112	0
66.688	0
228.096	0
137.574	0
602.829	0
175.36	0
187.059	0
65.152	0
82.7136	0
92.1856	0
61.9776	0
188.186	0
111.949	0
179.174	0
252.826	0
206.925	0
184.294	0
130.048	0
188.518	0
60.032	0
57.0368	0
349.542	0
154.88	0
319.923	0
192.717	0
479.539	0
174.49	0
58.9312	0
166.554	0
466.509	0
309.299	0
146.202	0
183.424	0
212.352	0
549.12	0
144.41	0
234.138	0
188.877	0
66.5344	0
165.094	0
319.437	0
184.013	0
206.31	0
139.827	0
108.211	0
264.32	0
192.051	0
115.558	0
146.278	0
137.549	0
126.208	0
199.578	0
207.872	0
25.216	0
333.696	0
175.488	0
79.872	0
208	0
326.477	0
209.178	0
93.184	0
154.957	0
321.741	0
152.858	0
207.539	0
326.246	0
65.0752	0
384.512	0
65.8432	0
142.336	0
79.4112	0
51.6352	0
330.061	0
58.4448	0
100.019	0
324.403	0
163.686	0
44.5696	0
218.778	0
152.038	0
172.954	0
201.574	0
81.8944	0
663.04	0
48.5376	NaN
134.784	0
23.0656	NaN
335.462	0
106.854	0
197.325	0
171.059	0
153.139	0
167.194	0
161.024	0
302.464	0
118.579	0
135.731	0
121.395	0
243.558	0
235.699	0
60.0064	0
624.486	0
172.134	0
165.683	0
162.483	0
127.13	0
336.026	0
139.776	0
203.29	0
54.1952	NaN
140.851	0
793.754	0
141.389	0
50.2784	0
119.04	0
144.307	0
144.41	0
328.602	0
694.682	0
62.6688	0
178.278	0
164.326	0
190.208	0
78.8224	0
124.339	0
290.099	0
73.6768	0
60.928	0
412.698	0
44.2624	0
70.0672	0
48.4096	0
152.576	0
182.912	0
51.8656	0
42.5984	0
408.96	0
67.2768	0
5.0944	NaN
215.962	0
204.493	0
146.432	0
112.768	0
228.25	0
170.163	0
140.928	0
341.274	0
75.1616	0
60.5184	0
280.678	0
56.0128	0
52.3264	0
349.184	0
266.65	0
191.514	0
144.563	0
284.237	0
62.2336	0
311.27	0
25.0112	0
246.528	0
57.7536	0
158.822	0
527.283	0
59.1616	0
209.434	0
208.461	0
124.467	0
183.987	0
254.49	0
169.395	0
186.189	0
197.376	0
181.99	0
270.182	0
228.224	0
278.502	0
62.5664	0
186.522	0
115.149	0
159.027	0
247.373	0
160.486	0
277.043	0
176.998	0
308.813	0
192.742	0
63.0016	0
123.264	0
157.542	0
143.974	0
88.9344	0
257.766	0
72.9856	0
37.2736	0
237.722	0
381.747	0
103.27	0
112.947	0
16.256	0
149.606	0
224.666	0
236.851	0
359.296	0
68.992	NaN
194.458	0
92.2112	0
165.248	0
136.371	0
176.333	0
63.8976	0
250.624	0
62.7712	0
132.634	0
48.128	NaN
205.926	0
340.224	0
59.4688	0
278.144	0
189.338	0.00110619
339.226	0
157.645	0
126.694	0
55.9872	NaN
178.406	0
192.051	0
378.522	0
67.0464	0
183.91	0
61.2608	0
160.23	0
167.501	0
106.829	0
23.0144	0
1048.99	0
106.931	0
83.3792	0
152.858	0
113.792	0
620.826	0
195.789	0
156.749	0
170.01	0
206.106	0
181.018	0
137.165	0
326.656	0
129.715	0
179.942	0
127.027	0
173.542	0
44.5952	0
334.438	0
154.65	0
69.76	0
273.818	0.000625782
404.582	0
243.712	0
166.426	0
163.533	0
62.6176	0
44.0064	0
178.202	0
79.104	0
128.768	0
166.272	0
51.1232	NaN
98.304	0
193.792	0
57.6	0
204.134	0
923.392	0
185.882	0
440.141	0
173.824	0
291.098	0
185.549	0
221.03	0
200.09	0
81.3568	0
289.306	0
347.162	0
298.88	0
233.011	0
212.224	0
114.176	0
131.277	0
167.091	0
408.346	0
132.531	0
276.915	0
212.71	0
308.147	0
157.722	0
251.597	0
172.518	0
265.6	0
552.986	0
908.39	0
76.1088	0
139.008	0
83.2512	0
225.178	0
225.587	0
269.824	0
72.3456	0
201.037	0
744.448	0
32	NaN
615.603	0
211.354	0
114.304	0
24.8832	NaN
186.778	0
68.096	0
169.062	0
193.331	0
132.454	0
243.2	0
62.2336	NaN
67.5328	0
127.616	0
321.075	0
133.965	0
160.563	0
245.018	0
72.7296	0
238.848	0
92.16	0
183.757	0
204.467	0
225.869	0
212.301	0
168.858	0
133.427	0
178.714	0
305.203	0
74.112	0
33.5872	0
63.1552	0
200.064	0
132.813	0
191.232	0
401.05	0
3.6352	NaN
236.39	0
161.434	0
386.918	0
63.9744	0
98.2528	0
402.509	0
362.394	0
312.243	0
158.694	0
229.35	0
178.97	0
253.414	0
207.974	0
190.848	0
49.3056	0
177.587	0
162.33	0
288.358	0
222.771	0
911.206	0
52.2752	0
384	0
243.021	0
151.04	0
42.5472	NaN
190.234	0
435.712	0
190.771	0
272.307	0
249.37	0
404.224	0
15.488	0
134.246	0
50.816	NaN
180.659	0
114.022	0
124.058	0
102.067	0
329.754	0
182.861	0
185.549	0
1261.52	0
181.222	0
31.9488	NaN
48.9728	0
60.9792	0
175.974	0
127.13	0
236.979	0
106.086	0
202.445	0
136.141	0
63.0528	0
293.453	0
163.277	0
224.768	0
413.466	0
276.275	0
376.73	0
4337.33	0
284.442	0
403.814	0
132.045	0
98.4832	0
199.526	0
226.33	0
163.456	0
385.178	0
172.902	0
186.598	0
51.84	0
60.3136	0
146.97	0
178.637	0
67.0976	0
51.712	0
98.8416	0
228.045	0
179.405	0
41.472	0
50.5344	NaN
146.278	0
136.602	0
98.816	0
377.19	0
129.485	0
177.92	0
1656.99	0
278.733	0
80.4608	0
352.87	0
104.064	0
146.714	0
158.336	0
197.658	0
480.333	0
237.798	0
182.349	0
193.178	0
332.851	0
194.381	0
605.491	0
48.128	0
81.8432	0
74.5728	0
45.4656	0
146.074	0
191.155	0
478.592	0
105.19	0
288.87	0
319.744	0
197.171	0
577.664	0
109.133	0
34.8672	0
70.3744	0
91.6992	0
136.525	0
55.168	0
877.747	0
61.5168	0
55.296	0
116.301	0
116.454	0
198.733	0
57.728	0
29.7216	0
53.7344	0
249.19	0
162.253	0
197.632	0
233.19	0
183.04	0
177.997	0
294.682	0
498.176	0
160.077	0
71.7824	0
208.077	0
53.632	0
442.086	0.0181102
315.75	0
279.219	0
55.6032	0
186.47	0
53.4784	NaN
83.7376	0
136.192	0
152.243	0
203.494	0
192.307	0
205.056	0
125.747	0
142.285	0
321.792	0
102.451	0
33.0496	0
118.093	0
49.9456	0
110.848	0
152.422	0
176.282	0
197.709	0
158.387	0
165.606	0
47.3856	0
51.2768	0
222.362	0
78.08	0
277.248	0
114.278	0
340.198	0
1184.97	0
60.1344	0
291.174	0
134.246	0
72.6016	0
164.122	0
114.304	0
146.867	0
139.674	0
134.963	0
138.982	0
135.68	0
3013.86	0
69.888	0
168.55	0
807.245	0
190.336	0
256.922	0
238.925	0
194.586	0
64.8192	0
220.954	0
62.2848	0
125.875	0
142.566	0
294.426	0
192.922	0
211.712	0
187.878	0
226.483	0
199.68	0
147.021	0
213.478	0
169.958	0
311.142	0
442.854	0
197.658	0
70.4256	0
127.386	0
184.525	0
164.813	0
63.6928	0
241.92	0
63.7696	0
452.403	0
70.4768	0
52.352	NaN
216.141	0
73.9584	0
184.832	0
178.278	0
411.52	0
46.2592	NaN
133.427	0
360.09	0
492.8	0
115.891	0
178.56	0
327.834	0
103.117	0
171.162	0
175.744	0
111.872	0
199.194	0
208.358	0
110.054	0
4.8128	NaN
261.734	0
49.8944	NaN
224.154	0
266.086	0
207.13	0
269.619	0
165.094	0
354.381	0
217.421	0
378.138	0
169.088	0
68.4544	0
446.413	0
203.622	0
273.869	0
173.363	0
218.496	0
324.48	0
188.211	0
59.7248	NaN
134.451	0
96.3328	NaN
148.173	0
173.773	0
172.518	0
60.2624	0
181.581	0
57.9072	0
54.9632	0
422.451	0
260.25	0
300.902	0
685.824	0
87.6288	0
54.2976	0
141.568	0
311.782	0
171.29	0
256.87	0
101.248	0
556.058	0
124.749	0
187.392	0
158.08	0
238.899	0
168.832	0
277.76	0
268.134	0
588.083	0
546.842	0
215.091	0
490.291	0
60.7488	0
282.214	0
74.8288	0
220.365	0
201.062	0
135.757	0
53.7088	0
141.184	0
220.467	0
169.139	0
128.461	0
179.405	0
215.014	0
154.138	0
131.584	0
174.054	0
278.835	0
201.216	0
376.32	0
308.915	0
55.1936	0
339.482	0
269.261	0
66.1248	0
189.517	0
325.427	0
88.7296	0
153.882	0
124.8	0
92.416	0
128.102	0
178.714	0
243.584	0
153.779	0
399.411	0
191.821	0
189.901	0
662.886	0
135.68	0
125.875	0
64.4096	0
354.406	0
139.034	0
181.325	0
41.1392	0
431.488	0
224.538	0
638.694	0
71.3728	0
271.002	0
194.995	0
154.854	0
35.6608	NaN
378.24	0
234.24	0
351.488	0
130.611	0
72.5504	0
97.4336	0
311.475	0
272.742	0
180.608	0
309.683	0
212.454	0
421.786	0
212.122	0
160.307	0
327.475	0
92.9792	0
62.464	0
224.41	0
150.682	0
54.6816	0
270.925	0
397.363	0
67.712	0
440.038	0
138.803	0
66.2784	0
195.046	0
277.069	0
192.64	0
55.6288	NaN
143.232	0
38.1696	0
48.1536	0
108.8	0
143.667	0
117.811	0
220.646	0
554.854	0
6.9632	0
188.211	0
72.8832	0
262.323	0
92.672	0
45.056	0
157.005	0
188.262	0
87.3472	0
91.1872	0
55.4752	0
676.864	0
266.778	0
328.397	0
321.126	0
610.074	0
85.0688	0
403.635	0
258.125	0
142.899	0
61.4656	0
171.11	0
176.896	0
163.84	0
185.651	0
607.334	0
191.155	0
145.613	0
393.677	0
199.501	0
309.734	0
162.637	0
216.397	0
260.147	0.0330357
217.114	0
71.7312	NaN
189.542	0
96.7936	NaN
32.6144	NaN
192.23	0
212.736	0
375.526	0
316.672	0
174.003	0
139.494	0
212.506	0
[truncated: 8,704 more rows]
