# Supplementary material for: Bacterial survival in microscopic surface wetness
Source: eLife. 2019 Oct 15;8:e48508. doi: 10.7554/eLife.48508 (PMC6824842; doi:10.7554/eLife.48508)
Supplement: Figure 3—source data 1. — Figure 3C: Total area covered by cells per mm2, binned by host droplet area. Raw data: droplet area [μm2] vs total live cell area [μm2] and total dead cell area [μm2] for P. fluorescens Figure 3D: Total area covered by cells per mm2, binned by host droplet area. Raw data: droplet area [μm2] vs total live cell area [μm2] and total dead cell area [μm2] for P. putida Figure 3E: Mean survival and standard error of survival rates within droplets, binned by host droplet area. Raw data: droplet area μm2] vs total live cell area μm2] and total dead cell area μm2] for P. fluorescens, P. putida Figure 3F: Mean survival and standard error of P. fluorescens survival rates within aggregates, binned by host droplet area and aggregate area. Raw data: survival rate vs droplet area vs aggregate area for P. fluorescens Figure 3G: Mean survival and standard error of P. putida survival rates within aggregates, binned by host droplet area and aggregate area. Raw data: survival rate vs droplet area vs aggregate area for P. putida. All droplets and aggregates areas are in [μm2]. [file elife-48508-fig3-data1.xlsx]

## Sheet: Figure 3C,D
log10(min droplet area [um^2])	1.25	1.75	2.25	2.75	3.25	3.75	4.25
log10(max droplet area [um^2])	1.75	2.25	2.75	3.25	3.75	4.25	inf
p. fluorescens
total live cell area [um^2] per [mm^2]	6210.61	5726.6	2752.78	3658.04	3514.15	994.059	295.04
total dead cell area [um^2] per [mm^2]	29.7283	19.0298	14.1047	79.4197	208.945	355.101	1099.22
p. putida
total live cell area [um^2] per [mm^2]	403.754	5284.86	3589.19	1281.09	733.271	348.2	146.825
total dead cell area [um^2] per [mm^2]	14.9366	176.313	235.151	286.014	439.947	554.703	579.961

## Sheet: Figure 3E
log10(min droplet area [um^2])	1.25	1.75	2.25	2.75	3.25	3.75	4.25
log10(max droplet area [um^2])	1.75	2.25	2.75	3.25	3.75	4.25	inf
p. fluorescens
mean survival	0.0149961	0.0117436	0.0237584	0.0416681	0.0912316	0.342722	0.845387
Standard Error	0.000925492	0.00140715	0.00492505	0.00869558	0.0200992	0.0710496	0.0622219
p. putida
mean survival	0.0446246	0.0469704	0.0637246	0.168588	0.342156	0.573705	0.747494
Standard Error	0.004217	0.00141574	0.00230482	0.00985552	0.0233408	0.0484574	0.0545761

## Sheet: Figure 3F
p. fluorescnes - mean live cell area ratio
		0	0.75	1.25	1.75	2.25	min aggregate area [um^2]
		0.75	1.25	1.75	2.25	inf	max aggregate area [um^2]
1.25	1.75	0.0147204	0.00160395	NaN	NaN	NaN
1.75	2.25	0.0192838	0.00293054	0.00138192	NaN	NaN
2.25	2.75	0.0278656	0.0125726	0.00598886	0.000219278	NaN
2.75	3.25	0.0623047	0.0508669	0.01612	0.0158707	0.0182176
3.25	3.75	0.0622839	0.0375726	0.0430991	0.0943241	0.0408905
3.75	4.25	0.395134	0.207845	0.232216	0.306135	0.296619
4.25	inf	0.837709	0.73164	0.70143	0.7716	0.748331
min droplet area [um^2]	max droplet area [um^2]
p. fluorescnes - standard error live cell area ratio
		0	0.75	1.25	1.75	2.25	min aggregate area [um^2]
		0.75	1.25	1.75	2.25	inf	max aggregate area [um^2]
1.25	1.75	0.00125197	0.000419971	NaN	NaN	NaN
1.75	2.25	0.00285055	0.000770912	0.00079264	NaN	NaN
2.25	2.75	0.00536955	0.00369665	0.00380101	0.000161796	NaN
2.75	3.25	0.00654645	0.00861861	0.00839254	0.00702725	0.0114528
3.25	3.75	0.00669277	0.00732414	0.0141008	0.0212576	0.0156016
3.75	4.25	0.0221466	0.023744	0.0358041	0.0558238	0.0669894
4.25	inf	0.0182223	0.0412403	0.0753747	0.0904596	0.0846982
min droplet area [um^2]	max droplet area [um^2]

## Sheet: Figure 3G
p. putida - mean live cell area ratio
		0	0.75	1.25	1.75	2.25	min aggregate area [um^2]
		0.75	1.25	1.75	2.25	inf	max aggregate area [um^2]
1.25	1.75	0.0365669	0.0577069	NaN	NaN	NaN
1.75	2.25	0.0531424	0.0255572	0.0533596	NaN	NaN
2.25	2.75	0.0688039	0.0590738	0.0587236	0.0943001	NaN
2.75	3.25	0.112524	0.129068	0.13795	0.239799	0.34013
3.25	3.75	0.174907	0.212229	0.315449	0.403905	0.538035
3.75	4.25	0.402925	0.430825	0.491766	0.604938	0.719759
4.25	inf	0.71288	0.808022	0.768332	0.743485	0.772219
min droplet area [um^2]	max droplet area [um^2]
p. putida - standard error live cell area ratio
		0	0.75	1.25	1.75	2.25	min aggregate area [um^2]
		0.75	1.25	1.75	2.25	inf	max aggregate area [um^2]
1.25	1.75	0.00450868	0.0144482	NaN	NaN	NaN
1.75	2.25	0.00208452	0.00105799	0.0133342	NaN	NaN
2.25	2.75	0.00340329	0.00246068	0.00464079	0.0435502	NaN
2.75	3.25	0.00779853	0.00898611	0.0116942	0.0227427	0.086166
3.25	3.75	0.0111043	0.0159977	0.0237326	0.0393058	0.0341973
3.75	4.25	0.0178937	0.0261033	0.0278964	0.0328895	0.042983
4.25	inf	0.0165459	0.0187449	0.0287655	0.0497358	0.0354478
min droplet area [um^2]	max droplet area [um^2]

## Sheet: Fig 3C,E raw p fluorescens
droplet_area	live_area	dead_area
8.3968	0	0
2.7648	0	0
9.1648	0.0768	0
60.4416	0	13.312
25.3952	0	0.896
6.272	0	0
21.504	0	0
129.229	5.1456	11.8528
23.1168	0	2.3808
23.8336	0	5.5552
7.3472	0	0.0256
47.7696	0	6.0672
18.0992	0	1.28
4.6592	0	0
17.92	0	3.2256
7.9616	0	0
617.293	0	53.1712
15.7696	0	1.28
595.84	0	116.301
33.2544	0	2.2272
30.208	0	7.8592
60.1344	0	8.0384
53.6576	0	9.984
6.144	0	0
15.7696	0	0
7.5776	0	0
69.0432	0	16.2304
33.8176	0	6.3232
521.907	0	35.328
3.5584	0	0
19.3536	0	0
64.256	0	16.384
64.3072	0	7.3984
95.2064	0	12.2624
7.9104	0	0
3.6864	0	0
27.7248	0	0
9.5232	0	0
13.5424	0	0
104.013	0	12.4928
6.912	0	0
28.2624	0	5.6064
39.0144	0	2.8928
34.0224	0	5.6832
6.9376	0	0
32.0256	0	1.792
21.4528	0	4.5824
33.7664	0	6.6816
39.7312	0	0
79.616	0	9.216
108.083	0	18.176
26.5216	0	0
5.1968	0	0
39.4496	0	2.048
22.528	0	0
14.592	0	0
32.8448	0	5.2736
31.2576	0	0
9.9072	0	0
25.088	0	0
27.4176	0	3.712
6.6304	0	0
3.4304	0	0
25.7792	0	4.2496
3.712	0	0
86.656	0	15.2576
53.9904	0	15.0272
27.4176	0	1.92
56.7296	0	2.9696
13.44	0	0
33.152	0	5.2224
33.9712	0	3.9168
5.632	0	0
15.1808	0	0
40.8064	0	4.992
4.7872	0	0
33.152	0	5.0176
8.2432	0	0
33.7152	0	7.296
103.398	0	13.9776
6.3232	0	0
24.704	0	0
41.2672	0	5.6064
91.7504	0	12.6208
3.5584	0	0
75.8784	0	13.4656
158.976	0	27.8784
51.968	0	3.0208
37.7856	0	2.56
45.4656	0	3.1232
50.176	0	8.576
45.5424	0	6.6304
50.56	0	7.9872
34.2528	0	4.864
38.1952	0	7.68
29.696	0	0
38.4512	0	5.9392
913.408	0.7168	12.4672
11.1104	0	0
6.8608	0	0
50.8672	0	0
9.728	0	0
35.3024	0	2.2784
65.3056	0	12.3648
11.52	0	0
44.6208	0	5.504
4.992	0	0
8.3456	0	0
31.8464	0	5.1712
57.2928	0	9.3952
32.4352	0	5.1456
2.9952	0	0
69.7088	0	13.7216
65.3056	0	5.3504
34.7648	0	3.7632
58.9568	0	9.1392
45.1328	0	6.4768
7.6032	0	0
31.1808	0	2.7392
31.7952	0	2.7904
32.64	0	2.6624
34.8672	0	2.5088
32.5888	0	6.6304
35.2512	0	0
38.4256	0	5.8112
7.8592	0	0
36.9408	0	3.2256
3.072	0	0
53.376	0	10.7776
27.4176	0	2.6624
5.4016	0	0
30.9504	0	4.6848
48.3072	0	7.7056
31.2576	0	6.272
31.6928	0	5.1968
77.9264	0	11.4688
4.224	0	0
4.7104	0	0
99.5584	0	26.7008
37.8624	0	7.9616
193.024	0	41.6768
28.8256	0	3.6352
43.7248	0	7.808
4.3008	0	0
49.0752	0	8.4224
59.4688	0	1.1776
81.4592	0	17.152
15.9488	0	0
30.4896	0	4.9408
41.7536	0	4.608
36.992	0	2.2016
28.9536	0	3.6864
1646.08	0	417.382
41.3184	0	2.7392
42.5472	0	7.424
77.7472	0	20.1984
323.507	0	86.7584
81.4336	0	1.8944
16.9472	0	0
29.2864	0	5.6832
37.4784	0	5.6832
35.5584	0	3.1232
51.9936	0	13.4912
38.5536	0	5.8368
46.8736	0	2.0224
8.8064	0	0
44.4416	0	9.4464
5.4784	0	0
34.176	0	2.2016
34.0224	0	5.9904
2.6624	0	0
31.7952	0	0
105.037	0	6.5024
54.9376	0	8.0128
39.1168	0	5.7088
54.3488	0	11.5456
12.1856	0	0
19.2512	0	0
38.272	0	3.3792
8.0384	0	0
64.6144	0	9.1904
32.0256	0	2.6368
161.536	0	36.1984
40.7808	0	8.7296
7.7056	0	0
1395.4	0	212.941
3.0208	0	0
39.3728	0	5.888
16.5632	0	0
75.9296	0	19.1488
37.888	0	5.7088
102.4	0	18.9952
13.7472	0	0
41.6256	0	6.6048
59.3664	0	13.9264
5.6576	0	0
104.525	0	1.2288
3.6352	0	0
40.9088	0	2.8416
43.264	0	5.8624
25.9584	0	0
70.1184	0	13.7216
36.0448	0	6.3488
37.7344	0	5.2736
71.2192	0	10.7008
70.2208	0	12.8512
55.5008	0	10.4448
23.5264	0	0
6.4768	0	0
4.3008	0	0
7.2448	0	0
6.144	0	0
5.4528	0	0
3.9424	0	0
47.488	0	9.4464
18.3552	0	0
74.8544	0	13.5424
98.3808	0	28.0832
7.4752	0	0
39.936	0	5.5552
36.352	0	7.5776
26.3168	0	9.3184
7.9872	0	0
49.6896	0	9.0112
23.5264	0	0
44.3904	0	6.4768
29.952	0	5.4016
3.6864	0	0
73.984	0	8.6528
2.7904	0	0
637.133	0	92.6464
35.9424	0	2.3552
1378.56	0	237.978
4.9408	0	0
45.824	0	11.0848
3.8912	0	0
12.1856	0	0
4.1984	0	0
36.8896	0	2.4064
6.7072	0	0
8.5504	0	0
6.4	0	0
35.9168	0	2.3296
5.5808	0	0
24.8832	0	0
97.536	0	0
38.2976	0	6.4512
28.9792	0	0
30.5664	0	5.6832
2.9696	0	0
29.0816	0	2.8672
31.4624	0	4.8128
7.936	0	0
5.2992	0	0
26.112	0	5.0432
12.9024	0	0
35.7376	0	6.6816
5.248	0	0
3.456	0	0
34.3808	0	5.9392
30.6688	0	5.5552
43.8016	0	5.7344
15.872	0	0
12.6976	0	0
33.6128	0	6.0928
32.0512	0	4.4544
11.2896	0	0
51.6608	0	0
4.6848	0	0
15.9488	0	0
21.3504	0	0
58.5984	0	8.448
45.1584	0	4.6592
48.8448	0	5.9136
5.5552	0	0
18.944	0	0
2.5856	0	0
30.5664	0	12.8256
40.2176	0	9.6768
35.8912	0	4.3264
6.9376	0	0
39.4496	0	2.6112
11.9296	0	0
47.3088	0	7.7568
41.2672	0	5.9136
1182.87	0	214.784
73.1648	0	16.128
7.2192	0	0
47.1552	0	7.7568
465.075	0	79.4112
145.459	0	31.8208
7.936	0	0
7.7056	0	0
19.9168	0	0
4.7104	0	0
8.2176	0	0
34.4832	0	6.9632
39.8592	0	0.7168
5.0688	0	0
34.56	0	3.0208
6.144	0	0
104.115	0	26.1376
34.3552	0	4.5824
43.52	0	6.7328
8.6528	0	0
31.744	0	5.76
4.0448	0	0
62.5664	0	6.0672
9.2672	0	0
38.2208	0	2.3552
46.9248	0	11.5968
18.176	0	0
78.8992	0	17.3568
47.4112	0	7.0912
3.2512	0	0
47.6672	0	4.7104
12.5184	0	0
20.3008	0	0
48	0	6.0928
8.2432	0	0
39.9872	0	3.9424
32.9216	0	6.1696
14.976	0	0
33.5616	0	5.9904
35.6608	0	1.4848
98.2528	0	24.8832
9.2928	0	0
70.6048	0	12.288
13.5168	0	0
31.104	0	2.9952
14.2592	0	0
5.888	0	0
2.7648	0	0
43.136	0	4.1216
8.96	0	0
4.7104	0	0
157.645	0	20.7616
33.9712	0	1.8688
15.8464	0	0
26.5472	0	2.8416
6.9376	0	0
21.12	0	3.3024
33.6384	0	5.6576
74.8288	0	17.2032
5.5552	0	0
6.912	0	0
4.3776	0	0
47.3088	0	6.0416
6.5536	0	0
20.7872	0	3.8912
7.8336	0	0
7.3216	0	0
14.2592	0	0
83.2	0	14.208
282.65	0	79.7696
360.243	0	145.152
28.16	0	4.3008
8.7552	0	0
40.6784	0	4.5824
10.88	0	0
32.2304	0	4.9408
4.224	0	0
32.9984	0	8.7296
9.0624	0	0
8.2944	0	0
69.1712	0	10.4704
16.5632	0	0
555.008	0	146.586
26.1376	0	3.5328
5.8112	0	0
43.776	0	3.6864
37.9904	0	2.9184
7.6288	0	0
53.2224	0	8.1408
3.8144	0	0
36.3264	0	4.3776
21.6576	0	2.56
7.5008	0	0
40.576	0	4.5312
11.52	0	0
7.68	0	0
35.1232	0	4.4032
30.1824	0	4.9664
13.2096	0	0
42.7776	0	3.3024
36.992	0	2.2272
32.3584	0	4.1984
89.9072	0	20.48
36.7616	0	5.5296
3.4048	0	0
6.784	0	0
2.7648	0	0
5.8112	0	0
10.5216	0	0
38.3488	0	5.5296
20.5568	0	0
18.304	0	0
9.1904	0	0
6.7072	0	0
6.8096	0	0
8.96	0	0
28.672	0	5.12
38.0672	0	8.6272
5.9904	0	0
35.6352	0	2.432
19.7376	0	0
34.3808	0	3.7632
2.7648	0	0
13.824	0	0
57.6	0	8.0896
40.6016	0	5.4528
52.1984	0	14.208
32.6144	0	5.1456
53.9136	0	10.6752
38.9632	0	8.448
25.344	0	7.1424
109.389	0	33.7408
38.8352	0	1.8688
47.36	0	3.3792
6.5024	0	0
3.9424	0	0
5.3248	0	0
2.7904	0	0
33.28	0	5.8112
2.8416	0	0
64.9984	0	8.3456
58.752	0	6.144
4.6848	0	0
2.7904	0	0
7.5264	0	0
8.448	0	0
41.2416	0	4.4288
76.3392	0	13.5168
44.6976	0	6.784
58.9824	0	11.3408
9.7536	0	0
36.1984	0	2.4576
42.9568	0	6.1696
56.7296	0	5.4528
33.0496	0	1.28
74.24	0	8.704
50.9184	0	2.7136
31.2576	0	5.5808
59.776	0	13.4144
109.107	0	22.9632
26.112	0	2.3808
7.1424	0	0
9.0624	0	0
53.2736	0	8.832
6.9632	0	0
28.8768	0	5.2224
111.565	0	22.9888
2.8672	0	0
30.1824	0	4.8896
9.1648	0	0
10.752	0	0
9.7536	0	0
12086.1	11.6224	1744.64
9.8816	0	0
36.0704	0	3.072
8.0896	0	0
37.12	0	5.5552
35.7632	0	1.664
12.9024	0	0
52.736	0	7.1936
52.3776	0	11.0336
37.376	0	4.224
533.248	0	125.594
6.656	0	0
714.829	0	148.634
46.7456	0	7.3216
36.864	0	6.6048
87.9872	0	13.1584
76.9536	0	19.9168
59.9808	0	12.0576
31.9488	0	5.504
36.7104	0	5.0176
15.488	0	0
16.7936	0	0.9216
51.84	0	8.3968
28.2368	0	0
110.464	0	10.3936
147.738	0	35.84
6.9632	0	0
9.6256	0	0
39.7568	0	8.3712
3.7632	0	0
39.3984	0	8.6784
37.7344	0	4.1472
7.6288	0	0
70.6816	0	15.1296
114.56	0	24.1408
35.6608	0	6.3488
14.8224	0	0
62.5152	0	12.288
7.8336	0	0
40.5248	0	5.7344
8.4736	0	0
123.725	0	33.2288
8.3456	0	0
9.728	0	0
45.184	0	8.0384
13.2352	0	0
3.4304	0	0
6.6816	0	0
33.28	0	7.2192
33.5104	0	6.2208
3.584	0	0
8.32	0	0
27.264	0	0
126.566	0	11.4432
39.3472	0	6.5536
31.7696	0	4.1216
21.4016	0	0
4.7872	0	0
32.8704	0	4.3008
5.6064	0	0
3.4304	0	0
37.12	0	4.5312
35.328	0	4.5824
39.5264	0	7.424
31.0528	0	5.4016
58.2912	0	14.1824
53.376	0	11.7248
47.8976	0	7.9616
33.3568	0	5.9648
4.0704	0	0
8.6784	0	0
36.1472	0	2.9184
78.8992	0	11.0848
40.1152	0	6.9888
35.968	0	8.0896
31.0016	0	6.9632
27.1872	0	4.5312
10.496	0	0
5.248	0	0
85.2992	0	21.5296
105.293	0	17.0496
69.0432	0	9.8304
38.2464	0	8.064
33.8944	0	2.9184
33.152	0	3.3024
75.0592	0	20.3776
145.818	0	23.936
13.3376	0	0
2.7904	0	0
5.9392	0	0
70.5536	0	0
3.8912	0	0
13.9776	0	0
13.4144	0	0
4.48	0	0
10.9824	0	0
49.024	0	7.4752
4.7872	0	0
4.6336	0	0
34.0224	0	4.1472
277.222	0	48.3072
13.952	0	0
32.3584	0	5.12
52.8128	0	6.6304
30.9504	0	6.0416
15.2832	0	0
6.0416	0	0
40.2944	0	6.912
4.2496	0	0
3.2256	0	0
38.6048	0	7.9616
63.1808	0	12.3392
28.5696	0	4.6336
17.3568	0	3.9168
40.0896	0	12.2112
40.4224	0	5.2992
65.8944	0	9.7024
36.096	0	4.096
5.0432	0	0
4.5568	0	0
3.5584	0	0
34.9696	0	7.1424
8.448	0	0
33.0752	0	4.224
9.9584	0	0
133.811	0	27.6224
37.1712	0	6.2208
30.9248	0	0
13.1072	0	0
72.1152	0	14.5664
2.8672	0	0
220.518	0	9.1904
28.5696	0	7.424
119.578	0	29.7984
39.1424	0	5.7344
45.3632	0	8.832
5.8624	0	0
50.6624	0	6.912
118.144	0	20.7872
56.704	0	5.1712
28.0064	0	4.8896
3.8912	0	0
4.3776	0	0
12.2368	0	0
34.7136	0	2.944
9.8304	0	0
31.3344	0	4.9152
3.0976	0	0
31.1552	0	2.3296
13.2096	0	0
5.6576	0	0
9.8304	0	0.0256
66.6368	0	7.296
146.765	0	35.1744
33.8176	0	3.1232
3.1232	0	0
119.654	0	28.3392
322.406	0	63.2064
8.2688	0	0
2.7136	0	0
36.5824	0	2.7392
6.3232	0	0
58.1888	0	10.4448
40.4224	0	3.8656
76.6208	0	9.3696
15.4112	0	0
39.8848	0	3.2512
5.376	0	0
3.4816	0	0
28.288	0	1.6384
71.808	0	9.344
8.6528	0	0
5.2736	0	0
44.7488	0	4.096
33.664	0	3.6864
41.3184	0	8.2688
5.6832	0	0
38.272	0	7.552
23.7056	0	3.8656
72.448	0	17.28
6.784	0	0
78.0032	0	14.208
7.808	0	0
35.712	0	5.0432
8.192	0	0
62.4384	0	7.6032
14.5408	0	0
54.8864	0	10.624
3.7888	0	0
9.6256	0	0
5.3504	0	0
97.2288	0	15.2576
23.2448	0	0
30.3872	0	3.456
60.1088	0	6.4
67.6352	0	19.072
42.8032	0	2.8416
2.688	0	0
61.4656	0	22.8096
108.237	0	15.36
30.7456	0	4.4288
159.923	0	52.8128
637.056	0	139.11
105.395	0	24.8576
47.4112	0	3.3792
46.5408	0	6.272
31.9488	0	5.0432
3.3536	0	0
70.0672	0	5.0176
41.0624	0	7.9872
36.7616	0	7.808
35.8656	0	6.2208
34.6368	0	0
43.6992	0	6.1952
3.6096	0	0
40.1152	0	1.7152
34.6368	0	2.048
56.704	0	16.256
3.8144	0	0
42.0864	0	9.1648
58.24	0	11.008
53.7088	0	5.0176
9.088	0	0
14.08	0	0
14.8992	0	0
3.6352	0	0
3.6608	0	0
2.9696	0	0
34.176	0	2.2784
6.528	0	0
3.84	0	0
66.9952	0	20.8128
63.7184	0	9.2672
8.4736	0	0
4.5312	0	0
43.0592	0	9.1904
3.7888	0	0
50.5344	0	3.3792
11.3152	0	0
6.656	0	0
7.7056	0	0
2.6368	0	0
13.5168	0	0
35.9936	0	0
4.7616	0	0
11.0592	0	0
66.048	0	13.0304
93.2352	0	14.2848
6.6304	0	0
61.5936	0	10.5984
35.328	0	2.7648
8.576	0	0
53.9392	0	5.8368
12.7232	0	2.5856
66.3808	0	16.5376
3.7376	0	0
28.0576	0	5.9136
2.7136	0	0
11.136	0	0
35.712	0	2.2784
9.3696	0	0
49.2288	0	10.624
67.3024	0	8.1408
2475.85	90.0096	24.6528
53.1456	0	11.3408
77.9776	0	11.6224
491.802	0	134.298
34.8416	0	3.2512
32.1792	0	5.6832
84.4288	0	17.2288
77.1072	0	19.84
21.8368	0	7.5008
57.6768	0	6.0672
7.0144	0	0
3.0976	0	0
504.371	0	89.4208
41.088	0	6.1696
70.2208	0	7.3216
45.568	0	8.8576
38.9632	0	3.6096
38.1952	0	4.992
41.0368	0	3.84
160.563	3.8656	10.4192
684.672	0	156.8
5.0432	0	0
100.045	0	15.5136
28.6976	0	0
4.6848	0	0
32.2048	0	2.048
1460.61	0	236.134
49.5616	0	8.4992
34.1504	0	4.4032
31.232	0	2.1248
5.8112	0	0
35.5584	0	6.5536
5.5808	0	0
32.9216	0	1.6896
2.7904	0	0
41.6512	0	9.6768
14.8224	0	0
4.6336	0	0
2.944	0	0
7.168	0	0
22.2976	0	0
30.3616	0	6.144
27.4688	0	0
41.8816	0	9.216
39.7312	0	5.2992
238.694	0	95.2832
39.168	0	4.2752
3.7376	0	0
58.3424	0	3.4304
32.1536	0	2.8672
6.4768	0	0
11.0592	0	0
59.2384	0	10.1888
34.5088	0	7.3728
71.552	0	5.5808
35.712	0	8.8064
53.8112	0	9.1392
6.0416	0	0
22.9376	0	0
30.3872	0	2.8672
29.2864	0	4.608
596.838	0	117.606
36.736	0	2.9952
30.5664	0	1.5104
38.8864	0	2.1504
33.1008	0	5.1968
7.1424	0	0
26.496	0	2.304
30.1056	0	6.1952
28.8512	0	3.5328
8.6528	0	0
46.08	0	7.6288
29.4144	0	6.2464
33.2544	0	3.2768
17.1264	0	0
6.4768	0	0
89.0112	0	21.0176
37.8368	0	5.5296
11.8016	0	0
65.6384	0	12.6208
122.675	0	3.7376
8.4736	0	0
65.3568	0	17.3568
37.4272	0	2.2016
8.4736	0	0
33.8944	0	7.936
8.2432	0	0
3.4304	0	0
5.1968	0	0
12.16	0	0
30.08	0	4.5568
4.7616	0	0
60.7232	0	17.9968
38.4	0	4.2752
3.6096	0	0
28.9792	0	3.8912
117.632	0	35.1232
6.4256	0	0
58.2656	0	15.872
47.232	0	9.0624
39.0912	0	8.448
8.8576	0	0
39.3728	0	5.6832
7.3472	0	0
35.5072	0	2.8416
55.424	0	8.1408
10.9056	0	0
10.1888	0	0
11.3152	0	0
46.1824	0	8.1408
39.0912	0	7.552
31.104	0	4.48
6.9632	0	0
31.2576	0	5.504
72.4736	0	16.4096
47.5392	0	3.328
22.8608	0	7.4496
13.2352	0	0
3.1488	0	0
56.0128	0	9.0368
3.5584	0	0
17.4592	0	0
30.464	0	6.272
43.9296	0	7.2448
19.2768	0	1.4592
7.6288	0	0
34.56	0	6.3488
9.9584	0	0
8.5504	0	0
30.208	0	4.9408
42.8032	0	8.576
35.7888	0	8.5504
52.8128	0	7.6288
3.84	0	0
11.9808	0	0
4.3008	0	0
3.6608	0	0
5.1712	0	0
16.1792	0	0
56.3712	0	9.3184
30.8992	0	2.944
29.0048	0	2.7392
9.5744	0	0
53.632	0	10.1376
33.7664	0	6.3232
10.2912	0	0
5.8112	0	0
6.0672	0	0
3.4304	0	0
18.9696	0	0
26.8544	0	0
40.9856	0	8.0896
4.1728	0	0
192.742	2.4064	30.5408
37.4272	0	8.6784
3.5072	0	0
36.7616	0	2.4064
3.712	0	0
32.1536	0	5.4784
53.4784	0	7.7056
8.8576	0	0
14.336	0	0
139.213	0	33.3312
3.3536	0	0
40.5504	0	6.5536
9.9584	0	0
12.1856	0	0
4.096	0	0
235.29	0	49.9712
3.456	0	0
6.016	0	0
14.8736	0	0.2816
16.3584	0	4.096
33.3824	0	6.9888
9.6512	0	0
6.0928	0	0
8.7296	0	0
32.0256	0	4.1728
47.4624	0	0
15.5904	0	0
3.0464	0	0
21.1968	0	0
11.2384	0	0
33.5104	0	8.1664
41.728	0	7.3728
50.5088	0	9.9328
65.3568	0	12.3392
47.616	0	13.6704
33.8688	0	2.7136
37.8624	0.2304	0
34.1504	0	7.168
38.144	0	5.504
52.4288	0	7.8848
12.2112	0	0
9.472	0	0
20.8384	0	0
33.6384	0	6.3488
35.584	0	1.1008
58.6752	0	10.2144
3.2768	0	0
120.934	0	26.368
19.6096	0	0
7.552	0	0
12.9792	0	0
36.7872	0	8.2688
11.648	0	0
9.0368	0	0
40.3456	0	0
6.3488	0	0
137.728	0	32.2304
11.52	0	0
5.6064	0	0
38.8608	0	15.2576
6.0672	0	0
45.7984	0	3.5584
4.3776	0	0
23.3216	0	5.3248
55.936	0	10.1376
121.728	0	27.1104
99.584	0	16.4608
46.848	0	10.88
35.712	0	3.328
9.2416	0	0
13.0048	0	0
24.96	0	2.8928
11.6224	0	0
43.0336	0	5.8112
34.3552	0	3.456
106.931	0	0
19.0464	0	0
38.7328	0	6.3488
35.5328	0	4.5824
43.7248	0	5.6064
31.232	0	4.3264
57.2928	0	13.2864
2.7136	0	0
53.2224	0	12.416
23.1936	0	2.9696
87.5264	0	5.248
39.7056	0	8.4992
36.3776	0	5.2736
37.3504	0	8.0896
8.2944	0	0
9.7024	0	0
81.6384	0	14.336
36.992	0	2.0736
7.4496	0	0
3.328	0	0
67.968	0	14.0032
6.3232	0	0.0256
2.5856	0	0
7.6032	0	0
6.1696	0	0.0256
58.624	0	10.88
8.1408	0	0
6.784	0	0.0256
8.6272	0	0
13.6192	0	0
50.7136	0	6.4512
114.202	0	24.9088
60.1856	0	9.1904
67.7632	0	13.0048
56.064	0	7.7568
34.4064	0	6.6304
36.4544	0	4.224
3.2256	0	0
36.864	0	1.0752
5.7088	0	0
41.344	0	6.2464
32.2048	0	3.6352
45.4912	0	3.6352
5.0176	0	0
2.6368	0	0
21.9392	0	0
94.72	0	19.9168
38.0672	0	8.7552
54.4768	0	9.7792
27.8272	0	4.1728
30.7712	0	6.5792
27.2128	0	2.2016
11.264	0	0
47.5136	0	6.4256
61.0048	0	11.0848
40.2944	0	6.3488
44.9792	0	6.8864
33.792	0	7.7568
56.6528	0	8.0896
3.1488	0	0
3.6352	0	0
38.0928	0	8.0128
73.8048	0	9.4464
8.6784	0	0
59.3152	0	11.6224
30.5664	0	6.5536
29.2608	0	6.1696
76.4416	0	18.7648
12.1856	0	0
1710.18	0	453.709
41.5488	0	7.8336
58.5216	0	16.8192
31.2832	0	5.4272
31.7184	0	5.76
3.4304	0	0
32.3072	0	7.3216
63.616	0	13.312
3.1744	0	0
32.128	0	3.3536
35.9168	0	6.2208
5.4784	0	0
59.1104	0	14.3616
37.6064	0	5.632
3.84	0	0
35.0976	0	4.2496
8.1664	0	0
45.9264	0	5.8368
58.0096	0	13.5168
46.9504	0	7.5776
48.3584	0	11.8016
54.912	0	11.1616
10.9056	0	0
35.7888	0	2.6624
82.8672	0	19.84
6.0928	0	0
41.2416	0	6.2464
3.6096	0	0
27.5712	0	1.6384
66.4832	0	11.4944
38.9376	0	3.84
7.808	0	0
48.896	0	5.12
63.5136	0	10.3168
49.92	0	0
44.6464	0	5.9136
358.707	0	114.278
30.5664	0	5.0944
6.4	0	0
61.312	0	11.3152
5.4784	0	0
19.584	0	0
49.9712	0	14.2848
67.0208	0	15.232
4.1984	0	0
35.4048	0.3328	0
4.8896	0	0
148.301	0	32.9472
33.8176	0	4.3008
35.072	0	3.9168
3.4816	0	0
42.7776	0	7.168
1690.04	0	273.894
77.568	0	21.632
67.7632	0	6.6816
14.4384	0	0
29.2608	0.0512	0
11.6224	0	0
33.7408	0	2.7392
2.6112	0	0
41.1136	0	7.0144
950.733	0	182.195
32.8704	0	5.4272
4.0704	0	0
5.376	0	0
21.8368	0	6.1696
7.936	0	0
10.6496	0	0
90.368	0	18.5088
4.8128	0	0
3.4048	0	0
10.0608	0	0
11.3152	0	0
28.1088	0	3.6352
481.613	0	21.8112
12.288	0	0
45.8752	0	0
84.7872	0	12.5696
46.1568	0	9.7792
38.8352	0	3.6608
28.7232	0	5.1712
36.1216	0	6.5536
32.3072	0	8.7808
59.904	0.4096	5.1456
20.1472	0	4.4544
141.133	0	26.112
36.7872	0	10.6752
36.6848	0	7.7056
4.7104	0	0
22.8864	0	0.2304
56.9344	0	14.2592
32.4864	0	5.4272
29.5936	0.0256	1.4848
37.3248	0	5.8112
5.0432	0	0
7.7056	0	0
2.688	0	0
30.2336	0	3.4816
35.1488	0	5.4016
48.2816	0	1.7408
69.888	0	14.8224
37.7344	0	3.5328
30.9248	0	2.7904
30.6432	0	3.1744
87.6032	0	19.3024
35.7632	0	5.5552
31.1808	0	5.1968
4.0192	0	0
57.6	0	10.5216
43.3152	0	4.6336
49.92	0	11.008
23.3728	0	4.48
42.5216	0	8.0128
2.8928	0	0
60.544	0	12.5696
144.819	0.9472	0
15.7696	0	0
50.7392	0	13.696
83.2768	0	10.1632
38.9888	0	7.6544
169.37	0	44.288
50.6112	0	5.6832
29.1328	0	5.7088
6135.91	400.23	150.758
29.5424	0	6.5024
8.8576	0	0
5.8368	0	0
4.864	0	0
33.2544	0	6.6048
7.04	0	0.0256
9.472	0	0
6.912	0	0.0256
9.2672	0	0
59.6736	0	9.3696
10.1888	0	0
7.168	0	0.0256
5.5552	0	0
118.272	0	28.5696
3.4048	0	0
7.3728	0	0.0256
15.6416	0	0
14.0288	0	0
32.8448	0	0
48.1024	0	7.808
30.3872	0	8.0384
45.6704	0	3.9424
3.84	0	0
32.0768	0	3.1744
28.672	0	3.5328
39.2704	0	9.0112
29.1328	0	7.6032
34.7904	0	2.5088
3.0464	0	0
2.6624	0	0
56.7296	0	8.448
43.9552	0	6.1952
56.8576	0	8.8064
47.872	0	7.4496
47.0016	0	9.1392
31.2832	0	0
3.9424	0	0
34.5344	0	7.3984
139.187	0	36.096
63.0784	0	12.5696
28.8	0	0
49.28	0	13.2096
2.8672	0	0
7.7824	0	0
128.742	0	20.2752
16.1024	0	0
35.4304	0	7.6288
43.2128	0	7.8336
42.0608	0	2.176
95.4624	0	26.7776
37.4016	0	2.944
40.1152	0	7.2448
44.6208	0	9.9328
33.2032	0	6.3488
28.2624	0	0
53.8624	0	7.0656
3.2512	0	0
7.552	0	0
10.8544	0	0
14.0032	0	0
35.4304	0	7.04
7.68	0	0
6.528	0	0
35.8656	0	2.432
50.0224	0	6.784
3.456	0	0
37.12	0	5.4016
3.5328	0	0
38.4256	0	6.4768
49.4336	0	0
43.9808	0	3.9168
2.9696	0	0
230.886	0	52.5824
37.4016	0	6.8096
32.3072	0	7.7824
55.6544	0	8.6784
97.0496	0	22.9632
6.3232	0	0
7.8592	0	0
32.1792	0	0.128
40.576	0	8.2944
4.7872	0	0
21.12	0	0
6.0928	0	0
125.184	0	36.992
27.136	0	0
21.2736	0	0
3.1488	0	0
216.55	0	29.1328
4.224	0	0
33.0752	0	7.7056
39.7312	0	2.8928
39.3984	0	6.656
8.2432	0	0
34.0224	0	3.9168
8.4992	0	0
41.2672	0	7.168
8.7552	0	0
36.5568	0	1.8688
3.9168	0	0
7.8336	0	0
37.6064	0	6.4256
6.9376	0	0
56.6784	0	10.0608
61.8496	0	18.4832
31.5648	0	7.0912
28.7488	0	3.5072
4.5056	0	0
62.4128	0	6.6816
125.901	0	30.1568
46.2336	0	7.3472
3.8912	0	0
41.088	0	8.576
119.936	0	28.2624
32.4096	0	5.2736
5.5808	0	0
13.5424	0	0
164.864	0	29.1584
79.0272	0	18.4064
36.2496	0	7.4496
4.9408	0	0
30.6688	0	6.6304
11.1872	0	0
4.3264	0	0
33.792	0	7.2192
11.4688	0	0
38.3232	0	2.4576
40.1152	0	5.1968
42.496	0	9.3952
49.9456	0	8.5248
38.2976	0	4.2496
35.0208	0	6.5024
52.1472	0	13.8496
79.104	0	18.432
54.272	0	8.1664
9.6256	0	0
39.0912	0	5.4784
47.4624	0	9.4208
7.0656	0	0
46.976	0	10.1888
32.4608	0	4.0704
44.2112	0	8.2688
37.0688	0	7.9616
86.0928	0	21.7344
34.7136	0	7.3728
34.7648	0	1.8176
34.9696	0	6.1184
3.9424	0	0
14.4384	0	0
31.5648	0	7.1424
63.0016	0	3.9168
5.888	0	0
4.992	0	0
32.7936	0	1.4848
33.5616	0	5.9136
23.2192	0	3.84
13.7728	0	0
65.2544	0	17.4592
2190.31	0	303.104
122.419	0	31.6928
3.4816	0	0
58.3424	0	5.0432
42.8544	0	7.5264
5.9392	0	0
6.6048	0	0
62.8992	0	15.1808
9.5744	0	0
90.7008	0	11.136
42.752	0	5.888
36.8896	0	6.7328
42.0608	0	7.2448
678.144	0	142.438
72.8832	0	16.7424
31.6672	0	6.2208
5.7344	0	0
11.8016	0	0
20.096	0	0
9.1392	0	0
40.5504	0	7.8848
134.17	0	33.9968
31.8976	0	5.7088
34.0992	0	5.0944
3.968	0	0
47.5392	0	3.968
82.2016	0	11.648
37.6832	0	6.7584
7.1424	0	0
7.8592	0	0
98.3552	0	14.976
33.2032	0	4.992
215.373	0	37.504
6.2464	0	0
30.4384	0	7.8592
2.688	0	0
3.0464	0	0
13.4144	0	0
39.6288	0	3.8912
42.0352	0	5.7088
60.7232	0	12.1088
38.6304	0	8.2944
40.6784	0	3.1744
18.4832	0	2.4064
31.4624	0	5.3504
49.0752	0	6.6304
38.144	0	8.2432
2.9184	0	0
72.5248	0	10.496
32.8448	0	0
36.8896	0	6.528
31.4368	0	4.2752
6.272	0	0
11.8784	0	0
5.7856	0	0
9.0368	0	0
32.4864	0	7.2448
27.8784	0	5.6576
54.0416	0	9.9072
49.2544	0	10.3168
11.5456	0	0
5.0688	0	0
41.8048	0	8.7552
41.5232	0	4.5824
7.04	0	0
49.9712	0	12.8
39.1424	0	7.3728
34.1504	0	7.168
13.056	0	0
4.7616	0	0
55.8848	0	12.8
11.8016	0	0
5.5552	0	0
30.5664	0	4.0704
6.5024	0	0
524.339	0	101.632
6.9888	0	0
5.9392	0	0
6.2208	0	0
6.272	0	0
31.4624	0	3.8912
2.5856	0	0
4.6848	0	0
47.3856	0	7.9616
33.4848	0	0
6.0672	0	0
16.9472	0	0
59.5712	0	12.544
33.5872	0	4.096
3.328	0	0
5.7088	0	0
10.9824	0	0
31.6672	0	4.2752
43.6224	0	9.6512
54.1696	0	3.968
7.3472	0	0
21.8624	0	0
16.0768	0	0
3.2	0	0
51.6352	0	8.6272
10.5216	0	0
4.4544	0	0
76.1344	0	13.7472
13.3632	0	0
35.3024	0	3.0464
8.7552	0	0
37.4784	0	3.2768
718.234	0	155.136
47.104	0	12.1088
53.0432	0	9.4976
33.8432	0	3.328
38.016	0.3584	1.9456
43.2384	0	5.376
7.5776	0	0
53.5296	0	12.6208
101.427	0	29.184
173.158	0	18.5088
7.6032	0	0
37.1712	0	3.2256
11.3664	0	0
30.6432	0	5.76
31.5904	0	1.408
11.0848	0	0
29.2608	0	5.2992
118.656	0	26.2656
183.296	0	39.0656
64.0256	0	14.1312
40.576	0	9.0368
58.2144	0	10.9824
52.7616	0	8.96
20.7872	0	0
8.4736	0	0
6.528	0	0
41.0624	0	8.2688
69.376	0	17.2032
73.3952	0	16.256
165.658	0	48.64
55.5776	0	6.784
31.0272	0	4.6848
49.5872	0	5.8624
12.8256	0	0
51.6352	0	7.0144
68.0448	0	14.1824
3.1232	0	0
36.7872	0	4.4288
68.6336	0	11.9808
7.168	0	0
5.376	0	0
36.5312	0	6.144
35.7376	0	1.2288
33.536	0	4.8384
32.2304	0	3.712
20.8384	0	0
36.6336	0	4.736
6.1184	0	0
32.2048	0	4.6336
38.6048	0	5.7088
31.616	0	2.0224
4.0192	0	0
8.704	0	0
28.1088	0	2.9952
9.2416	0	0
43.1616	0	0
10.2144	0	0
50.9184	0	9.4208
31.6928	0	5.9136
59.4688	0	9.6512
34.5344	0	0
6.2464	0	0
42.8032	0	5.6064
20.5056	0	0
7.2192	0	0
6.0416	0	0
75.1872	0	9.5488
3.4304	0	0
67.1488	0	13.2352
4.608	0	0
10.6496	0	0
45.2608	0	7.0144
15.2832	0	0
6.6304	0	0
43.0848	0	4.5056
34.2016	0	5.3248
31.9232	0	2.048
25.7792	0	5.6576
84.1216	0	20.7872
98.2016	0	15.8208
64.6912	0	7.6544
262.272	0	37.4016
28.032	0	2.1248
15.4368	0	0
11.4176	0	0
34.6112	0	6.0928
15.6416	0	0
49.6896	0	8.448
9.2928	0	0
28.9024	0	3.584
46.2592	0	9.856
45.3888	0	6.0416
4.5056	0	0
33.0496	0	5.504
33.6384	0	3.328
34.7904	0	4.608
35.584	0	6.016
77.7728	0	11.5968
40.5248	0	6.8608
33.408	0	4.736
31.9488	0.7936	0
26.9568	0	1.5104
9.7792	0	0
29.4912	0	3.584
3.6608	0	0
42.368	0	10.3936
33.7152	0	3.6352
3.2256	0	0
6.9632	0	0
50.7904	0	15.5392
102.886	0	19.6352
36.4544	0	2.2528
33.0752	0	5.6832
35.5072	0	3.6096
74.4704	0	10.1632
6.912	0	0
35.4816	0	3.3792
3.2	0	0
8.6272	0	0
4.7872	0	0
10.88	0	0
15.3344	0	0
21.2224	0	1.408
53.9648	0	6.5792
35.0976	0	0
31.9744	0	2.432
279.654	0	12.1856
46.3872	0	7.936
6.2976	0	0
9.7024	0	0
56.704	0	10.5216
5.632	0	0
70.4	0	14.2848
68.0704	0	9.6512
150.81	0	41.9328
38.2208	0	6.784
9.0368	0	0
26.5984	0	5.1968
5.6064	0	0
19.2512	0	0
30.4128	0	3.2768
64.6656	0	10.9824
64.3072	0	17.3312
72.0384	0.2816	0
2.7136	0	0
4.0448	0	0
31.1552	0	5.1712
173.722	0	46.336
37.0176	0	2.432
5.8368	0	0
30.336	0	5.632
3.0464	0	0
31.0784	0	5.8368
30.1056	0	1.5104
48.6912	0	4.2496
37.0176	0	4.0192
30.5152	0	0
32.1536	0	2.3808
15.9488	0	0
39.552	0	3.328
34.6368	0	8.2432
56.2944	0	9.7024
72.6784	0	8.2432
6.9632	0	0
3.7888	0	0
4.3776	0	0
25.4976	0	0.6912
624.742	0	10.5728
21.8624	0	6.016
34.048	0	4.1984
50.8928	0	9.3696
36.4032	0	7.2192
5.1968	0	0
4.9408	0	0
9.7536	0	0
2.9184	0	0
37.1968	0	4.4544
6.144	0	0
60.8512	0	6.6048
8.7296	0	0
37.248	0	2.9184
14.6688	0	0
14.1568	0	0
661.581	0	130.662
6.8096	0	0
7.2448	0	0
29.7984	0	3.5584
42.3168	0	8.6016
51.6608	0	9.6
13.2096	0	0
3.712	0	0
5.8112	0	0
20.3776	0	0
32.6912	0	2.176
186.24	0	32.4096
6.4	0	0
67.1744	0	12.16
5.2224	0	0
153.677	0	20.4032
710.81	0	85.3504
82.3552	0	20.3264
49.5872	0	5.2992
30.4896	0	5.1712
39.7568	0	5.5552
3.7376	0	0
4.4544	0	0
33.2544	0	4.5824
57.8816	0	12.2624
35.5072	0	2.4832
63.872	0	10.496
33.6384	0	4.8128
8.192	0	0
56.6528	0	0
36.0192	0	6.1184
37.5552	0	2.7904
5.8368	0	0
18.4576	0	0.6656
11.4688	0	0
14.1056	0	0
42.5984	0	5.9136
10.88	0	0
6.8608	0	0
97.408	0	14.3872
58.624	0	11.8784
32.9216	0	6.6048
12.8256	0	0
35.584	0	1.92
65.9456	0	12.5696
39.0656	0	8.448
43.8784	0	2.5856
3.8656	0	0
32.512	0	3.9168
33.5616	0	0
4.7616	0	0
13.8496	0	0
10.1376	0	0
3.072	0	0
3.3536	0	0
8.704	0	0
15.7696	0	0
36.1472	0	3.3536
6.5536	0	0
5.8624	0	0
78.5152	0	14.848
3.6352	0	0
58.0608	0	10.3424
109.133	0	17.1776
39.6544	0	5.0944
6.6048	0	0
3.3792	0	0
38.9888	0	6.3488
34.048	0	5.1456
89.8816	0	14.2848
36.5056	0	2.9952
42.88	0	7.0144
92.4672	0	14.6432
8.3968	0	0
29.8496	0	5.2224
3.4304	0	0
84.8896	0	19.0976
36.8384	0	8.3712
19.4048	0	0
7.3728	0	0
32.6144	0	5.1968
6.7072	0	0
6.6304	0	0
72.0896	0	4.5056
4.1472	0	0
38.784	0	7.3728
23.8848	0	3.9936
37.6832	0	9.1904
46.336	0	8.4736
20.8128	0	0
125.798	0	29.9008
10.4704	0	0
2.6368	0	0
31.2832	0	5.9136
38.1952	0	7.0144
57.344	0	11.3664
4.48	0	0
50.9696	0	5.6832
9.0112	0	0
14.08	0	0
20.6592	0	0
5.4016	0	0
4.0704	0	0
45.056	0	6.0672
49.664	0	7.68
51.1232	0	8.9344
6.1696	0	0
6.8096	0	0
41.1904	0	5.3504
7.4752	0	0
11.7504	0	0
47.104	0	4.8384
30.72	0	2.5088
2.5856	0	0
35.9424	0	7.1424
3.4304	0	0
7.9616	0	0
58.8288	0	7.0656
57.5744	0	6.144
111.155	0	22.3488
104.038	0	19.6352
3.3024	0	0
30.336	0	4.3008
3.6352	0	0
2.816	0	0
17.5872	0	0
3.712	0	0
88.7296	0	21.0944
11.008	0	0
6.912	0	0
3.6864	0	0
7.1936	0	0
6.4512	0	0
71.5008	0	11.264
72.6016	0	9.9328
36.224	0	5.6064
3.3792	0	0
69.8112	0	10.8032
7.4752	0	0
50.9952	0	7.0144
558.157	0	100.301
130.79	0	37.1968
33.1264	0	2.944
54.016	0	8.704
90.1888	0	37.76
2.8416	0	0
90.2912	0	18.8672
43.7248	0	6.0672
120.576	0	0
50.176	0	7.68
30.0032	0	4.7872
50.944	0	8.1408
40.0384	0	4.48
57.5232	0	8.5504
46.8736	0	4.352
9.2416	0	0
28.8768	0	4.6848
7.1424	0	0
10.7008	0	0
31.104	0	4.608
27.5712	0	2.3552
4.9664	0	0
48.2048	0	8.8576
11.9296	0	0
56.9088	0	0
6.8608	0	0
39.808	0	7.552
15.5904	0	0
88.9088	0	27.2896
13.7216	0	0
42.4192	0	4.8128
12.7744	0	0
15.7184	0	0
29.0048	0	4.3776
66.9184	0	12.928
65.2288	0	13.6192
6.1696	0	0
32.0256	0	5.0176
3.7376	0	0
38.0416	0	5.2736
3.6096	0	0
3.9168	0	0
26.0864	0	2.048
28.1344	0	3.5072
72.4736	0	13.6448
31.5136	0	4.4032
46.2848	0	7.8592
37.632	0	6.0928
173.133	0	33.792
84.8896	0	21.4784
35.3536	0	6.3232
7.7824	0	0
13.8496	0	0
9.4976	0	0
2.6112	0	0
4.4288	0	0
4.5568	0	0
36.0192	0	2.1248
134.886	0	22.2976
2.6112	0	0
47.5136	0	7.1936
23.424	0	0
67.328	0	11.4944
12.5952	0	0
73.8816	0	13.0816
44.672	0	6.9376
45.1584	0	6.6048
188.186	0	48.7424
79.4368	0	16.1536
33.5104	0	4.9408
36.9408	0	3.5584
3.5584	0	0
3.3792	0	0
39.936	0	4.4288
63.7952	0	12.8512
123.366	0	6.144
3.4304	0	0
134.502	0	44.1856
4.8384	0	0
47.0016	0	10.0608
72.576	0	17.1008
28.544	0	3.5328
11.9296	0	0
61.4144	0	8.1152
6.6048	0	0
34.304	0	3.3536
2.944	0	0
70.5024	0	9.7792
10.9056	0	0.2816
100.198	0	21.0944
28.032	0	4.0704
43.8528	0	0
67.5328	0	12.1344
41.6768	0	4.224
36.0704	0	7.3472
6.656	0	0
5.2736	0	0
12.4416	0	0
7.296	0	0
39.68	0	2.4576
4.9664	0	0
31.7184	0	2.4064
32.8192	0	5.8112
3.0208	0	0
44.416	0	5.7344
8.2944	0	0
5.6832	0	0
34.2016	0	6.144
34.944	0	2.1504
11.52	0	0
37.4784	0	5.7088
98.4832	0	19.2512
32.4352	0	6.9376
11.9552	0	0
37.8624	0.9472	0
6.5792	0	0
41.728	0	3.4048
78.1312	0	0
4.3264	0	0
1910.99	0	397.466
39.1424	0	4.4288
4.864	0	0
14.7456	0	0
4.4544	0	0
65.4336	0	13.7472
6.4256	0	0
79.0784	0	12.9792
12.8	0	0
33.8176	0	3.584
5.6832	0	0
61.6192	0	9.4976
446.208	1.3568	4.3264
12.9024	0	0
78.4896	0	13.9776
38.0928	0	6.8864
30.4384	0	2.7648
11.7248	0	0
7.5776	0	0
2.8672	0	0
184.627	0	34.9184
2.7648	0	0
5.4528	0	0
39.4752	0	5.376
13.2864	0	0
8.064	0	0
38.5024	0	5.0432
2.5856	0	0
9.8816	0	0
2.6624	0	0
61.5168	0	12.9792
103.654	0	17.7152
7.2704	0	0
3.9424	0	0
32.1024	0	4.9664
14.1824	0	0
593.562	0	123.648
9.0368	0	0
5.2736	0	0
11.8016	0	0
71.1936	0	17.8944
30.2848	0	4.2752
24.4736	0	1.8688
6.6304	0	0
4.864	0	0
14.8224	0	0
36.864	0	5.0432
9.984	0	0
3.584	0	0
3.4816	0	0
10.3168	0	0
43.9296	0	5.4016
7.5776	0	0
36.736	0	5.12
100.915	0	13.3888
29.4656	0	3.4048
24.8576	0	4.608
58.6752	0	10.0608
11.52	0	0
31.4368	0	2.8672
7.9616	0	0
7.8336	0	0
65.5616	0	11.8272
7.0144	0	0
4.7104	0	0
14.1824	0	0
30.6944	0	4.1984
34.2528	0	4.9664
33.28	0	6.2464
44.1344	0	4.096
70.8096	0	12.8768
38.2208	0	6.9888
28.16	0	3.1488
6.528	0	0
38.4256	0	2.3808
5.7856	0	0
64.0512	0	12.288
2.688	0	0
6.7584	0	0
25.216	0.5632	0
66.7648	0	11.9552
3.712	0	0
36.0704	0	3.0976
37.8112	0	5.4528
10.5728	0	0
8.32	0	0
39.5008	0	5.9136
4.5056	0	0
41.9328	0	5.1456
8.448	0	0
36.1728	0	3.5072
2.8672	0	0
322.509	0	57.5744
35.84	0	4.3008
3.3792	0	0
41.4208	0	3.8656
8.704	0	0
32.7424	0	4.7616
2.6112	0	0
2.7392	0	0
11.136	0	0
45.0048	0	5.4016
8.5248	0	0
4.5824	0	0
24.8576	0	3.4048
41.9072	0	6.3744
6.144	0	0
14.592	0	0
24.064	0.8192	0
5.248	0	0
42.7264	0	8.9088
34.2016	0	5.6576
12.7744	0	0
7.6032	0	0
6.6048	0	0
8.448	0	0
8.6528	0	0
21.1712	0	3.2256
19.0208	0	0
105.037	0	17.5872
11.2384	0	0
9.216	0	0
48.9216	0	8.2432
35.3792	0	6.8864
35.4048	0	2.816
5.504	0	0
10.1376	0	0
84.3776	0	6.4768
9.2928	0	0
4.224	0	0
36.0704	0	6.3744
2.8416	0	0
73.472	0	15.3088
171.955	0	33.152
37.2992	0	2.9952
2.944	0	0
47.9232	0	5.76
28.9792	0	2.432
7.936	0	0
2.944	0	0
34.688	0	5.8368
16.256	0	0.2304
37.2992	0	3.1232
3.8144	0	0
37.0688	0	2.1504
10.5728	0	0
146.534	0	31.8976
12.6464	0	0
511.949	0	102.221
4.5568	0	0
6.1696	0	0
[truncated: 29,361 more rows]

## Sheet: Figure 3D,E raw p putida
droplet_area	live_area	dead_area
1604.99	21.8112	128.179
15.3344	0	0
145.254	0	11.904
70.8352	0	4.8128
30.72	0	0.8192
119.936	0	11.776
62.1824	0	2.2272
51.2	0	5.0944
28.5952	0	0.896
195.763	0	13.3632
132.506	0	10.8544
96.6656	0	9.472
3.7632	0	0
228.531	0	25.3952
11.0848	0	0
13.0816	0	0
110.848	0	5.6576
66.0224	0	2.7648
62.1824	0	5.2736
110.95	0	5.8368
105.242	0	4.9152
79.488	0	4.3264
123.648	0	12.928
49.5104	0	4.6592
162.611	0	0
78.7968	0	6.4768
4.5056	0	0
7.3984	0	0
146.048	0	5.9136
96.128	0	7.0144
63.4112	0	1.8432
1122.36	0.0512	88.1152
511.309	0	44.3904
144.717	0	16.2304
138.138	0	7.7056
53.9904	0	1.8688
5.76	0	0.1536
76.8	0	6.5024
171.597	0	13.5936
15.5648	0	0
136.883	0	8.6016
73.3952	0	6.3744
417.126	0.9728	31.9744
172.288	0	7.424
104.96	0	2.432
112.102	0	6.2464
66.8672	0	5.3248
299.955	0	31.1552
164.326	0	5.3248
261.171	0	14.8224
120.525	0	8.6272
50.8672	0	2.8416
91.6736	0	7.5776
82.0224	0	8.4224
65.7152	0	3.2768
4.4544	0	0.2048
99.7376	0	7.4752
59.3664	0	4.4288
84.9408	0	7.1936
66.0992	0	2.9952
4.5824	0	0
71.4752	0	6.3744
320.41	0.0768	20.2496
90.9568	0	4.608
385.51	0	36.864
146.304	0	16.3328
111.949	0	10.9056
41.5488	0	1.664
163.994	0	13.9264
6.2208	0	0
320.87	0	32
100.07	0	7.0144
205.85	0	14.7968
97.6128	0	3.7376
135.168	0	9.088
153.037	0	11.776
61.3888	0	3.968
477.824	0	42.2912
116.608	0.3584	9.8816
117.171	0	6.8352
95.1808	0	8.4736
182.989	0	14.1056
130.867	0	16.3072
249.882	0.9216	16.4864
94.9504	0	7.3472
103.142	0	4.1984
247.808	0	11.9552
104.294	0	7.8592
86.784	0	6.1184
120.499	0	8.704
117.683	0	9.2672
81.3568	0	3.072
92.8768	0	7.0144
58.0352	0	4.8896
57.8304	0	2.4832
35.1488	0	3.1488
94.8992	0	2.4576
183.45	0	14.2848
74.9312	0	5.12
57.8816	0	1.9968
70.528	0	5.1968
190.413	0.512	12.5184
46.0032	0	2.6112
75.0592	0	6.1696
211.226	0.6912	12.8
77.9008	0	7.1424
115.917	0	4.608
213.35	0	21.2224
69.376	0	4.1728
96.5888	0	7.8336
166.118	0	17.5616
169.549	1.3824	11.1104
107.827	0	9.2928
64.2816	0	4.7104
71.6544	0	3.6352
114.048	0	6.016
94.2592	0	2.3296
178.842	0	16.5888
81.7664	0	7.0144
327.168	0.4352	28.2368
173.133	0	13.0304
70.6048	0	2.0992
85.376	0.8448	4.5568
89.5232	0	7.6544
76.9024	0	5.6832
107.827	0	4.2496
183.424	0	3.7632
109.594	0	7.5008
97.7664	0	4.3008
28.16	0	1.5872
173.798	0	20.7872
121.549	0	9.3696
72.4224	0	3.328
96.256	0	6.6304
81.5616	0	5.7088
117.734	0	9.2928
81.8688	0	7.1936
418.842	0	42.112
2.7136	0	0
107.802	0	7.4496
136.038	0.3072	6.1696
64.384	0	5.0944
1395.15	1.8944	94.4896
573.824	0.3072	43.008
138.086	0	15.6416
151.731	0	12.3904
83.7376	0	2.5856
68.7104	0	3.968
370.074	0	49.3824
150.758	0	13.312
59.648	0	5.5296
46.0288	0	1.7664
47.8208	0	5.9136
138.445	0	10.2144
51.5584	0	2.6368
81.8432	0	4.4032
229.376	0.512	15.4112
19.456	0	3.0464
2.816	0	0
86.4768	0	4.8896
3.7888	0	0
262.912	0.7168	26.3424
87.5776	0	6.6304
3.9424	0	0
92.1344	0	6.5536
81.4848	0	9.1648
270.95	0	22.7072
84.4032	0	5.4016
26.8288	0	1.5872
115.686	0	5.9136
59.9808	0	4.352
135.27	1.152	9.9328
3.8144	0	0
284.979	0	32.0256
51.8144	0	2.688
113.946	0.128	5.5552
137.984	0	11.2896
194.483	0	13.3632
91.8784	0	7.3728
84.096	0	6.144
67.2512	0	5.0688
96.4096	0	8.6528
155.136	0	13.9008
145.254	0.3072	14.8736
3.3792	0	0
78.336	0	5.0688
94.336	0	7.5264
127.258	0	8.1408
7.1168	0	1.4336
95.8464	0	8.2944
163.405	0	14.7456
40.9344	0	1.792
90.7776	0	7.5776
66.3808	0	4.5312
125.926	0	10.4448
63.9744	0	3.0464
124.083	0	13.3632
371.558	0.9216	35.1232
45.1072	0	1.5104
105.242	0	8.3712
112	0	5.5552
40.448	0	3.9424
159.59	0.9472	14.4128
50.5088	0	3.328
85.248	0	9.0368
2.7904	0	0
136.448	0	16.2816
126.771	0	11.6736
81.6128	0	6.656
37.6832	0	0.3328
81.1776	0	6.4256
2.6112	0	0
40.0128	0	1.8432
79.0528	0	2.9696
163.84	0	21.6832
112.794	0	7.0912
75.1872	0	5.0944
97.2544	0	3.968
202.291	0	19.9936
75.52	0	4.5568
231.91	2.3552	18.6368
4.1728	0	0
42.5472	0	1.8176
259.379	0	31.8208
124.083	0	14.3104
149.862	0	11.7504
92.544	0	7.0912
62.976	0	2.56
136.038	0	10.112
67.2768	0	5.1712
136.602	0	13.1328
92.416	0	3.072
301.286	0.2304	14.3104
118.195	0	3.5328
193.997	0.64	18.8928
75.1616	0	6.6816
39.8848	0	1.2288
124.467	0	10.9824
38.016	0.2304	1.7152
62.6176	0	3.6608
118.477	0	7.3984
299.648	0	25.1392
76.544	0	4.224
74.8288	0	4.352
172.646	0	21.0176
103.168	0	8.7296
222.592	0.7936	12.3136
3.2512	0	0
19.3792	0	0.64
154.342	0	18.9952
2387.94	34.1248	143.59
73.6768	0	4.864
67.1488	0	4.0704
81.3312	0	6.144
83.9936	0	6.5792
52.3008	0	2.56
124.262	0.8192	6.6048
66.3296	0	4.1728
94.592	0	6.4768
4089.55	1.408	60.8512
89.5232	0	7.3472
184.704	0	24.448
3.328	0	0
155.366	0	13.4912
3.5328	0	0
258.995	0	21.5552
191.846	0.8192	8.4224
224.384	0	22.0416
84.352	0	3.2512
10.7264	0	2.4832
4.224	0	0
66.1504	0.3328	2.6112
90.9056	0	9.5744
165.171	0	12.3136
84.9664	0	5.3248
348.083	0	40.2944
136.09	0	11.3664
11.264	0	1.5616
97.6384	0	7.5776
112.563	0.2816	8.7808
80.0512	0	4.2496
84.9152	0	4.0192
83.2512	0	4.0192
228.122	0	15.0272
118.554	0	9.8304
86.9376	0	5.4016
102.784	0	9.2672
80.3328	0	5.632
97.6128	0	6.7584
41.6256	0	1.5616
85.5296	0	7.808
82.8928	0	4.5568
76.0064	0	4.4544
226.458	0	27.6992
3.3792	0	0
1113.65	1.664	84.0192
3.3536	0	0
95.6672	0	6.1184
170.163	0.8192	15.104
106.88	0	8.0896
81.7408	0	7.5776
253.645	1.4336	16.512
187.085	0	20.6848
89.1392	0	7.8848
124.698	0	9.7024
90.112	0	5.6832
141.389	0	11.52
146.918	0	11.4432
94.2336	0.8448	5.0944
137.523	0	9.856
818.637	2.7392	10.2912
81.8688	0	5.888
89.2672	0	6.2208
65.5872	0	5.0944
3.9168	0	0
67.4048	0	3.5072
149.606	0	20.9664
295.552	3.3024	19.9424
82.6624	0	7.7824
189.21	0	5.4528
74.9824	0	6.0672
89.856	0	5.248
428.8	0	34.9952
176.563	0	4.6592
223.462	0	19.0208
98.0992	0	8.4224
52.0704	0	1.8432
15.1552	0	0
131.533	0	7.5776
3.328	0	0
254.106	0.0256	21.4016
154.342	0	16.7168
271.334	0.8448	18.4832
113.715	0	7.808
125.491	0	5.9904
720.947	2.688	62.336
105.267	0	6.656
5.7344	0	0
109.466	2.2528	5.0432
66.7648	0	4.2496
146.688	3.328	2.7904
40.7808	0	1.408
69.76	0	4.1728
182.118	0	24.1152
23.3984	0	5.9392
406.298	0	26.9312
80.6912	0	4.3008
26.8544	0	1.6384
78.4384	0	6.8608
111.923	0	8.6528
164.634	0	21.504
188.698	0.9984	11.2128
71.2192	0.4352	2.5088
115.328	0	10.1376
111.334	0	10.4448
46.3616	0	4.7616
111.462	0	8.1152
6.912	0	0.5632
163.994	0.9984	14.8992
47.0016	0	2.7392
318.387	0.3328	40.6528
94.7968	0	6.528
60.1344	0	2.1504
91.4432	0.5376	4.6848
92.9792	0	7.552
89.7792	0	7.1424
87.1168	0	5.7856
45.9264	0	1.9712
112.512	0	8.32
86.8864	0	5.12
59.1872	0	6.0416
61.2608	0	4.8384
62.336	0	4.0704
69.376	0	4.9408
1196.54	18.816	98.9184
123.085	0.0256	1.6128
60.288	0	2.7136
113.152	1.3824	4.1984
255.744	0	33.152
65.8432	0	6.7072
96.512	0	5.9904
258.611	0.7424	37.3248
36.736	0	1.8688
7.3472	0	0
45.4144	0	0
123.571	0	10.0096
69.0176	0	6.2464
109.645	0	7.168
138.01	0	8.4224
94.7712	0	5.6832
274.253	0	35.2
121.242	0	9.2416
54.2464	0	2.7648
77.0048	0	0.3328
7.7824	0	1.3568
231.27	0.8448	7.7568
143.898	0.6144	6.144
86.4768	0	6.1184
3.456	0	0
500.198	0	19.2768
60.8768	0	4.1984
151.782	0	15.0784
262.195	0	18.4576
151.834	0	9.9072
85.7344	0	3.8656
58.24	0	5.5808
105.728	0	2.2784
93.9008	0	7.1936
69.12	0	2.432
2.9952	0	0
36.6592	0	4.864
115.328	0	5.0944
191.744	1.2288	11.264
128.435	0	9.7792
30.7968	0	2.8416
48.5632	0	6.912
50.2528	0	4.1216
3.8144	0	0
67.3536	0	5.4016
95.488	0	5.2224
93.44	0	8.3456
73.8304	0	5.1456
84.0448	0	6.5536
57.728	0	3.6608
91.3664	0	5.888
45.2608	0	1.3568
58.2912	0	4.4288
85.6576	0	5.7856
123.392	0	10.6752
3.6864	0	0
106.24	0	6.1184
3.6608	0	0
164.557	0	7.3472
3.0464	0	0
184.474	0	13.1328
99.0976	0	5.4528
109.03	0	7.5776
75.1872	0	4.8896
46.9248	0	2.9696
189.133	0.5888	21.9136
218.88	0	25.216
3.6608	0	0
101.786	0	8.0128
188.006	0	13.3376
70.2464	0	1.4336
75.52	0	3.7376
7.2448	0	1.0752
233.677	0.6144	16.1536
117.786	0	10.8032
251.776	1.7408	5.888
76.3648	0.5888	5.0944
4.4032	0	0
101.76	0	7.9616
125.082	0	12.8
97.8944	0	8.192
42.4704	0	2.5088
68.224	0	1.9456
231.245	0	22.1184
115.328	0	5.12
466.304	0	55.936
107.264	0	9.4208
111.898	0.7936	6.4512
95.36	0	4.2496
181.094	0	9.5488
284.57	0	29.5168
184.397	0	16.8448
71.296	0	5.2992
102.605	0	9.0112
74.496	0	3.6608
148.352	0	14.0288
64.2304	0	3.2256
102.477	0	8.9088
154.445	0	15.9744
80.5888	0	4.6336
95.5392	2.048	1.2544
109.235	0	9.8816
78.3104	0	6.8352
58.4704	0	3.9424
116.07	0	10.5216
95.5136	0	8.1408
99.7888	0.896	4.0448
93.2352	0	3.5328
121.958	0	4.7104
41.2416	2.0224	0
90.24	0	4.5824
93.0048	0	9.856
1881.52	23.5264	122.419
118.246	1.3824	8.064
114.534	0	14.4128
199.706	0	16.4352
124.851	0	9.344
74.24	0	8.4736
76.3392	0	3.4048
144.23	0	5.6064
2.7648	0	0
131.994	0	9.9584
8861.11	261.965	215.578
190.08	0	21.7088
1085.06	14.1312	71.7824
148.608	0.8704	8.192
92.6464	0	6.7584
91.7504	0	5.0176
444.416	1.024	37.6064
75.6736	0	4.096
3.3536	0	0
49.8176	0	2.2784
58.8544	0	2.2016
110.003	0.8704	5.9392
128.947	0	13.1328
120.602	0	10.1632
98.816	0	5.504
46.208	1.0752	0
74.4704	0	6.2464
2.944	0	0
6.272	0	0
413.85	3.2512	23.5264
53.2992	0	3.4816
149.862	0	12.8768
102.451	0	5.0688
2.7392	0	0
67.5072	0	4.4544
83.5072	1.3824	2.5088
79.3344	0	6.528
81.5616	0	4.5824
79.1296	0	5.9648
4.608	0	0
40.3968	0	4.3264
69.1712	0	6.1952
99.456	0	5.9904
128.384	0	5.4784
3.0976	0	0
187.955	0.7424	18.7648
77.1584	0	6.272
97.7664	0	7.68
2.944	0	0
17.536	0	0
93.4912	1.1264	3.1744
201.216	0	14.6944
83.6608	0	5.2224
84.1472	0	6.2976
100.352	0.0768	4.5568
8.3968	0	1.152
4.7616	0	0
4.2496	0	0
1412.3	4.2752	142.899
70.2464	0	4.096
286.899	1.6384	16.9728
159.872	0	11.2128
15.5136	0	4.6848
182.784	0	17.2544
102.093	0	8.6016
269.67	0	42.496
79.3856	0	4.5312
35.6608	0	1.5104
3.0976	0	0
82.3808	0	2.8928
85.9904	0.8192	4.8128
3.6096	0	0
106.47	0	11.2128
147.635	0.4608	6.2464
155.315	0	13.568
53.7856	0	6.1952
135.91	0	6.6304
9.8304	0	3.456
115.149	0	7.6032
110.515	0	9.472
43.1104	0	3.8656
79.872	0	5.7856
2856.86	36.4032	311.987
166.528	0.896	15.2576
252.723	1.0496	14.3872
49.2032	0	5.2224
66.4064	0	6.016
76.0576	0.7168	3.2
142.208	0.9472	11.8016
58.2656	0	4.2496
349.722	0	18.0992
71.2448	0	4.4288
95.8208	0	8.32
72.2944	0	5.4528
602.138	2.4576	88.9344
55.424	0	0.6656
131.814	0	10.8288
149.094	0	13.3376
710.81	4.5312	39.9104
144.64	0	11.008
52.0192	0	1.792
39.7568	0	0.2816
111.949	0	8.2176
51.7888	0	3.072
15.0528	0	1.5104
66.4832	0	2.56
252.979	0.512	23.3472
4.352	0	0
56.6784	0	2.5088
64.9472	0	3.968
58.6496	0	6.016
47.9744	0	3.4048
71.3984	0	3.6608
107.443	0	6.8864
134.784	0	6.656
60.8	0	2.9184
252.979	0.1024	14.9248
104.013	0	9.4464
81.1776	0	1.9456
320.666	1.1776	31.2832
88.6528	0	5.4528
71.9616	0	5.0176
54.5792	0	2.6624
73.4208	0	4.5824
65.9712	0	3.5072
163.251	0	10.7776
82.56	0	3.8912
58.496	0	2.2784
84.6336	0	4.8384
100.992	0	8.3712
101.274	0	6.7328
53.9136	0	5.0176
74.9312	0	6.0672
85.9648	0	5.9392
107.315	0	4.096
286.643	1.024	21.76
314.547	0.5632	22.2976
232.602	0	15.2064
65.7152	0	3.3536
122.624	0	9.2672
230.784	0	18.5088
128.282	0	13.312
81.7408	0	3.84
175.283	0	11.4176
79.2832	0	3.456
64.256	0	1.5872
153.114	0.768	5.76
207.053	0	21.632
183.885	0	14.6432
155.725	0	7.2192
290.381	0	21.2736
69.248	1.2288	1.2288
108.749	0	6.5536
62.72	0	3.6864
109.824	0	7.296
232.934	1.9712	8.832
47.4368	0	2.1248
89.5232	0	6.4
2871.78	30.4896	148.941
85.2992	0	5.5808
126.336	0.64	6.4768
82.56	0.896	2.7392
111.206	0	5.3248
36.0704	0	2.2272
408.627	1.8176	23.1424
49.7152	0	2.3808
64.1024	0	3.968
188.032	0.3072	4.5056
291.43	0	26.2144
141.542	0	9.088
3.4816	0	0
78.208	0	8.6016
45.0048	0	1.8944
67.5072	0.7936	4.608
122.65	0.9984	5.3504
214.477	0	15.9232
75.6992	0	5.4272
95.36	1.1776	2.1248
45.1584	1.408	0
102.63	0	5.6576
71.7056	0	3.1744
228.326	0	24.6784
186.061	0	21.248
55.552	0	1.664
65.28	0	3.3792
106.931	0	4.9408
95.616	0	5.8624
11.5712	0	2.0992
47.36	0	1.3824
109.926	0.1792	5.12
75.5712	0	4.736
359.68	1.5104	21.4016
87.7056	0	5.4016
107.52	0	6.7072
139.776	0	7.2704
60.7488	0	6.3232
159.693	0.0768	9.7792
54.016	0	2.4064
172.442	0	14.2848
69.9648	1.1776	0
142.541	0	7.7568
137.498	0	11.1616
57.1392	0	4.9664
46.6176	0	1.4848
76.4416	0	3.4816
118.784	1.2032	6.4512
75.904	0	5.5808
59.9296	0	1.6896
86.6048	0	1.8688
99.2512	0.6912	2.8928
63.744	0	3.4816
69.0688	0	1.4592
114.227	0	5.8368
66.4064	0	3.2
72.8576	0	5.504
259.456	0.3328	20.2752
114.432	0	7.6288
50.0736	0	3.328
57.1136	0	3.0208
67.2768	0	3.6608
37.8368	0	3.1232
85.5552	0.6144	1.2032
122.317	0	11.7248
2.9184	0	0
76.3392	0	1.92
117.99	0	4.5312
65.792	0	2.5344
70.144	0	0.64
187.75	0	13.056
8.8064	0	0
51.9424	0	3.9168
65.8944	0	2.6624
84.9152	0	5.4528
90.24	0	6.3232
79.3856	0	3.2256
98.4576	0	7.9616
101.811	1.024	6.1184
12.2624	0	1.2544
148.173	1.0496	9.8816
62.8736	0	3.5584
109.056	0	8.5248
99.7888	0	6.7584
208.614	0	25.4976
70.784	0	3.2512
83.4048	0	3.6608
77.568	0	3.8656
3.7888	0	0.0256
101.786	0	5.2736
234.675	0	22.8096
379.008	1.6128	13.184
85.0432	0	6.784
248.32	0	15.5392
104.371	0	5.3248
98.6624	0	6.1952
2.9952	0	0.128
67.9424	0	5.376
34.3808	0	4.0448
71.0144	0	4.4544
155.827	0.5888	9.6768
54.5024	0	5.6576
4.0704	0	0
166.451	0.4864	4.736
44.1088	0	1.7664
123.392	0	7.2448
96.2816	0	7.0656
171.597	0	8.576
120.806	0.5632	7.4496
362.035	2.176	24.2176
70.4	0	5.3248
76.5184	0	2.7392
80.64	0	3.968
124.134	0	7.296
98.2272	0	6.8864
44.5696	0	1.7664
118.835	0	6.912
34.56	0	1.408
179.712	1.2032	9.2672
83.456	0	4.6592
69.2992	0	4.224
75.7248	0	4.2752
129.741	0.8448	6.9632
166.118	0	17.024
117.939	0	5.0176
279.04	0.0256	21.9392
96.256	0	7.1424
146.278	0	9.8816
12.9024	0	3.8144
651.443	3.8656	49.9712
198.477	0.9472	20.0448
110.746	0.896	4.9664
13.9008	0	1.5872
165.786	0	11.8016
102.323	0	5.6832
71.3984	0	4.6848
98.688	0	5.9392
160.179	0	16.9728
68.7616	0	4.8896
86.784	0	3.9936
82.6112	0	5.8368
18.8672	0	1.3568
63.488	0	4.48
79.616	0	7.4496
77.824	0	3.5328
132.915	0	7.68
196.378	0.6144	16.128
66.944	0	4.3776
64.256	0	5.7856
174.336	0	10.4448
497.92	3.6096	26.496
26.7008	0	0.256
102.067	0	1.9712
93.6704	0	10.112
226.842	0.896	17.6896
41.4464	0	1.9456
73.3952	0	5.6576
111.437	0	7.552
200.858	0.64	17.92
90.4192	0	6.6304
60.6464	0	2.304
96.3584	0	7.4496
131.635	0.2048	11.9552
77.0304	0	6.7072
102.579	0	6.528
98.6112	0	4.608
85.2992	0	2.7136
103.066	0.3072	6.4
86.8608	0	2.6112
85.504	0.8704	3.8144
54.5024	0.8704	0
77.0304	0	4.9664
52.7104	0	3.072
46.5408	0	1.3312
142.413	1.0752	6.7584
40.8576	0	3.2256
69.5552	0	4.8384
129.664	0	5.8624
116.864	0	10.4448
130.099	0.8192	10.8544
52.8128	0	2.2016
318.08	0.3328	32.3328
108.928	0	3.6352
153.933	1.0752	15.6672
130.048	0	10.0608
90.4448	0	5.248
81.3568	0	6.3488
185.958	3.3024	11.0336
106.291	0	4.2752
107.622	0	6.6304
127.795	0	13.8752
842.496	4.096	31.8976
2.6368	0	0
130.227	0	7.8336
38.4768	0	1.8688
70.1696	0	2.56
93.568	0	5.2224
72.0384	0	4.2752
132.531	0	9.1392
64.9216	0	2.7136
135.194	1.1776	9.0112
39.936	0.5632	1.536
10.4704	0	2.2272
132.173	0	8.5504
220.851	0	15.104
129.766	0	5.9136
100.787	0	8.4736
11.52	0	2.1504
3041.33	36.5568	149.555
144.435	0.4352	11.008
56.7296	0	1.7664
113.28	0	10.9568
172.083	0.5376	6.6816
82.9952	0	5.7344
184.55	0.768	12.672
93.8496	0	5.5552
138.982	1.5104	5.7344
222.515	0.8192	22.016
72.9856	0	4.4288
91.8272	0	3.5072
176.256	0	9.856
76.4416	0	3.7632
123.443	0	8.1152
110.362	0	9.2672
127.923	0	10.1888
174.976	0	11.6224
71.7056	0	3.8144
83.2256	0	6.5024
66.4576	0	10.3424
74.9056	0	4.8128
198.656	0	13.44
119.04	0	7.7568
155.085	0	8.7296
46.592	0	3.5328
57.6768	0	2.9184
80.2816	0	2.5344
12.7488	0	0
64.7424	0	5.6576
57.4208	0	2.432
158.438	0	11.776
63.7184	0	4.5568
3.456	0	0
97.2288	0.6912	6.016
91.5712	0	10.4448
142.874	0	8.0896
82.1248	0	4.5824
83.8144	1.2544	5.1456
326.118	0.128	33.3568
54.1952	2.56	3.2256
99.5584	0.768	2.688
86.912	0	6.4
4.3776	0	0
104.064	0	8.8064
41.6256	0	1.7408
265.472	0	26.1376
91.136	0	5.5296
95.8464	0	8.7552
255.002	1.2032	14.7712
52.0192	0	2.2272
153.242	0	15.9232
66.8416	0	5.7344
196.454	0	16.7936
171.827	0.4608	11.6224
68.3008	0	5.1968
111.821	0	7.7824
199.014	0	14.6688
3.9168	0	0
127.386	0	7.0144
140.902	0	3.2
165.171	0	14.08
95.8208	0	10.5472
372.608	2.048	19.7888
136.013	0.5376	6.0416
3.328	0	0
466.253	1.4848	48.0512
3.0464	0	0
254.157	1.536	15.4112
8.8064	0	3.7632
5.4528	0	0
81.8432	0	5.8368
5.76	0	0
132.429	0	7.808
63.2576	0	4.48
82.8672	0	3.8912
99.8656	0	5.2224
121.933	0.8448	6.0672
99.84	0	7.424
346.445	1.8176	30.6432
139.213	0	15.5904
101.069	0	9.1392
10.1632	0	0
4.4032	0	0
54.1696	0	7.0656
259.072	0.2816	23.4752
73.9072	0	2.8928
82.56	0	5.4784
121.907	0	11.52
84.7872	0	5.0944
115.2	0.6656	4.608
412.339	1.4592	35.8656
559.667	4.1216	36.0192
185.472	0	13.0304
67.7888	0	4.2496
128.256	0	7.9872
60.2368	0	5.248
10.5216	0	0
56.1152	0	3.0464
150.707	0	11.6736
76.5696	0	5.0944
85.248	0.6144	3.9424
148.147	1.8944	7.8336
75.2128	0	7.2704
126.413	0	7.6032
279.117	0.5632	23.0144
143.002	1.4336	11.9552
100.045	0	8.8832
97.92	0.64	4.096
38.528	0	1.5872
112.102	0	8.1408
107.827	0	13.0048
483.277	1.7152	48.3328
107.597	0	7.4752
5.3504	0	0
78.6432	0	4.1216
12.0576	0	1.3312
127.872	0	9.0624
82.2016	0	4.0704
67.2	0	4.2496
138.214	0	11.5968
56.8576	0	4.8384
4.8128	0	0
3.2	0	0
4.3264	0	0
132.275	0	11.8272
94.0288	0	6.016
400.666	0	23.6544
148.813	0	12.2368
122.854	0	7.3216
63.232	0	4.7872
4.224	0	0
69.7856	0	4.864
194.33	0	17.7408
91.136	0	10.2144
65.5616	0	5.6576
41.6512	0	2.1248
4.224	0	0
70.272	0	4.2752
4.3008	0	0
349.184	2.8928	11.2384
33.0752	0	2.7904
59.0336	0	2.2528
78.1312	0	6.2208
193.741	0	14.464
98.9952	0	8.1152
101.478	0	5.0944
124.442	0	6.4256
81.4336	0	4.9408
207.309	0	15.6672
102.272	0	4.992
89.344	0	3.9936
109.491	0	8.3712
197.606	0	12.0064
80.4608	0	4.5056
46.6688	0	1.6896
95.9744	0	8.6784
5.9648	0	0
706.637	3.1744	61.2352
335.77	0.6144	26.8032
66.0736	0	9.4208
54.6816	0	3.072
68.9152	0	2.56
88.1152	0	7.3216
59.4944	0	4.6592
168.781	0	11.2128
73.3952	0	4.4288
64.6656	0	3.9936
64.512	0	5.5296
110.259	0	8.2688
96.7168	1.9456	2.816
85.504	0	4.3008
112.768	0	9.2928
121.779	0	11.0336
763.136	7.2192	72.1152
76.1856	0	4.7616
64.5376	0	3.5072
2.8672	0	0
395.853	1.1008	50.2784
137.779	0	11.904
126.234	0	9.1904
32.64	0	2.3808
433.664	1.408	45.568
143.002	1.8688	8.32
7.0656	0	0
60.8768	0	2.6624
134.195	0	6.3232
97.92	0	4.8384
79.5392	0	4.6336
327.552	0.8448	38.144
7.2448	0	0
84.5568	0	4.7616
126.848	0	8.3456
75.776	0	3.2512
12613	496.742	339.149
126.925	0	16.4352
162.586	0	14.592
963.405	6.016	66.5088
86.2976	0	6.9888
51.6608	0	2.5088
47.36	0	1.2544
149.811	1.1776	9.088
92.1088	0	5.504
4.6592	0	0
276.07	0	19.712
95.4368	0	10.5728
133.402	1.4336	8.2176
170.701	0	11.4432
167.142	0	10.6752
82.4832	0	3.7632
95.7184	0	6.5792
10.4448	0	0
137.421	0	13.6704
74.624	0	4.7104
61.8496	0	6.2464
145.28	0.6656	6.528
74.8288	0	4.3264
101.632	0	6.912
84.5056	0	6.2208
78.08	0.6912	0.7168
156.262	0	11.648
113.587	0	8.3968
62.6944	0	6.6304
122.24	0	8.1664
299.827	0	29.5168
4.6848	0	0
121.498	0	6.2976
8.576	0	0
59.2384	0.7168	1.8688
101.299	0	4.9408
107.29	0	5.0432
183.347	0	23.5008
69.2736	0	4.4544
72.7808	0	4.2496
110.694	0	5.76
49.024	0	5.6832
84.736	0	6.4
92.1344	0	7.1936
97.5104	0	6.0928
86.9632	0.5632	3.3792
63.8464	0	2.8416
110.08	0	5.0176
130.509	0	12.8256
121.37	0	12.672
164.454	0	14.2336
81.5616	0.0256	6.5792
151.501	0	9.9072
70.8608	0	1.664
167.014	0	13.4912
71.5008	0	4.6336
4.608	0	0
107.827	0.3328	9.4464
142.694	0	19.4304
57.4976	0	4.3008
161.69	0	14.336
3.9936	0	0
89.856	0	6.784
89.4208	0	5.0688
158.694	0.9984	15.8976
153.626	0	14.848
63.9744	0	5.0688
3.1232	0	0
46.3872	0	2.7136
5.1712	0	0
46.4384	0	1.3824
102.144	0	7.9616
68.5824	0	5.8368
28.0064	0	3.712
84.1472	0	4.5056
87.6032	0	7.6288
100.864	0	4.7104
106.061	0.9728	4.6336
206.541	0	26.4192
95.744	0	8.6272
75.2384	0	5.7856
42.88	0	1.5616
208.026	0	15.872
139.366	1.8432	7.7312
81.4848	0	4.4288
73.0368	0	4.48
85.4528	0	5.3248
57.728	0	4.6848
95.5904	0	8.6528
3.072	0	0
67.8912	0	4.1472
107.904	0	8.5248
98.5856	0	8.0128
76.7232	0	5.12
65.7408	0	6.9376
88.6016	0	7.0912
203.75	0.128	13.7216
127.181	0.384	8.9856
82.6624	0	4.8128
44.6464	0	1.7408
47.9488	0	1.3312
31.8976	1.28	1.8176
70.8352	0	5.5808
83.6608	0	8.4224
64.5376	0	4.7872
75.904	0	5.5296
76.0576	0	3.6352
79.5392	0	3.8656
406.246	1.5872	46.2336
105.446	0	5.0432
80.6144	0	1.5872
197.12	0.7424	18.2528
220.621	0	22.016
127.872	0	12.4672
88.4992	1.152	5.4528
321.331	0.7424	29.6192
3.7376	0	0.6912
4.48	0	0
103.706	0	6.4768
107.136	0	7.552
56.96	0	4.0192
67.2512	0	5.9648
107.674	0	8.2176
9.216	0	0.9472
446.285	2.3808	36.3776
51.712	0	2.4576
78.08	0	5.9648
113.51	0	2.0224
67.1744	0	5.6064
161.946	0	9.4208
79.104	0	7.0912
76.928	0	4.1728
84.9152	0	8.3456
88.0128	0.9728	4.9664
341.299	0	25.9328
65.8688	0	3.9168
69.632	0	4.0448
73.8304	0	3.2
116.019	0	7.5008
247.142	0	21.0432
84.9664	0	5.4016
109.85	0	7.7568
118.426	0.8448	5.7088
5.4272	0	0
10.0352	0	0
81.4336	0.9728	5.0176
5.9904	0	0
214.758	1.152	13.7472
178.202	0.5888	15.1296
143.437	0	10.0864
71.2448	0	4.4288
96.6656	0.3328	4.7104
3.0976	0	0
118.195	0	8.4224
183.04	0	12.928
61.2352	0	2.8672
71.0912	0	4.1728
111.667	0	9.728
110.259	0	8.4992
62.6688	0	2.8416
93.9776	0	5.8368
88.6528	0	4.3008
122.214	0	11.8528
71.3984	0	6.0672
13.184	0	2.4064
117.555	0.6144	4.7616
70.6816	0	2.8672
102.554	0	10.5216
96.6144	0	6.7328
112.307	0	6.9632
100.403	0	5.4272
119.424	0	11.6736
8.6016	0	1.536
123.776	0	8.7552
122.24	0	5.7088
44.8256	0	2.6624
84.2752	0	3.8144
70.528	0	3.1232
39.6032	0	5.6064
75.4432	0	5.2224
310.886	0.9216	18.816
2.8928	0	1.408
61.6192	0	5.7088
129.587	0	7.6544
85.0176	0	4.4288
928.973	8.3712	63.7952
99.5584	0	1.2032
106.01	0.8448	4.4288
188.109	0	12.7744
462.797	0.0512	38.9888
130.739	0	5.632
124.006	0	6.0416
81.8176	0	4.6848
63.0784	0	3.328
112.563	0	6.9632
94.6944	0	6.272
3.84	0	0
459.827	4.864	20.1984
82.9952	0	8.7808
84.224	0	4.5312
94.72	0	3.8144
11.904	0	1.28
86.2464	0	4.3264
241.28	1.5872	23.3728
118.835	0	10.0864
8.6272	0	0
2136.91	4.864	86.3488
179.661	2.6624	2.6368
76.4672	0	4.5824
107.494	0	7.7824
56.704	0	2.4576
80.1024	0	5.8112
92.2624	0	7.552
74.6496	0	4.5824
211.686	1.3056	12.928
224.307	1.3312	13.7984
96.512	0	1.408
164.454	0	10.5472
98.4576	0	5.6064
61.7728	0	3.8912
98.176	0	8.5504
94.5152	0	12.9024
194.381	0	22.9632
135.706	0	7.0912
135.501	0	7.424
121.626	0	4.0704
461.44	1.7664	23.0656
95.5136	0	9.5232
692.557	5.9648	35.1232
118.938	0	10.3168
1218.43	23.2448	72.6016
76.3392	0	3.1744
68.2752	0	3.712
72.9344	0	3.5584
233.242	1.3312	9.2672
71.0912	0	3.584
79.1552	0	4.5056
17.3568	0	1.664
4.2496	0	0
191.002	0	10.7264
217.139	0	14.5664
23.0144	0	4.7616
171.443	0	14.6176
63.3856	0	2.5088
65.7664	0	2.7904
68.3264	0	3.6608
93.4912	0	5.12
160.998	0	7.3472
58.752	0	0
96.64	0	12.9792
90.9312	0	2.5856
92.928	0.6144	4.8384
200.653	0.128	13.7472
51.9168	0	1.4848
135.782	0	10.0096
262.81	2.1504	11.6224
123.29	1.0496	5.632
89.0624	0	4.7616
94.7968	0	6.144
55.936	0	2.5856
143.872	0	16.9728
379.802	2.432	20.0192
77.2864	1.3824	1.5872
243.251	0	30.2336
305.536	1.6128	24.064
177.51	0.8704	10.5216
71.8336	0	5.76
78.8992	0	6.4256
43.3408	0	2.0736
47.4368	0	3.8912
147.635	0	8.8832
110.541	0	11.2384
187.11	0.768	18.6112
34.2528	0	1.6896
134.938	0	11.6992
10.112	0	0.6144
84.096	0	4.5312
79.6928	0	6.6048
60.7488	0	4.1728
99.0976	0	7.1424
10.9312	0	0.9728
106.906	0	3.2512
163.584	0	13.056
303.642	1.0752	19.1232
75.9296	0	4.7104
66.0736	0	3.6864
65.0496	1.2288	1.9968
154.854	0	13.9264
127.002	0	10.2912
113.664	0	6.5024
87.7056	1.2032	2.1504
64.8192	0	2.944
255.181	1.28	13.3888
460.39	2.7136	25.1136
103.731	0	3.4048
80.768	0	3.6608
227.942	0	10.0352
482.099	5.1712	28.9024
175.539	0	4.3776
74.5728	0	4.2496
53.0944	0	6.4768
48.512	0	1.408
52.5824	0	1.1776
106.496	0	8.0384
10.4448	0	1.2288
204.16	0	17.9456
151.808	0	9.216
83.328	0	5.2224
132.096	0	7.1168
46.72	0	1.8944
127.59	0	8.3456
78.9248	0	3.7888
87.1936	0	5.76
66.9696	0	1.8432
91.5456	0	5.9648
80.4864	0	5.1968
71.0912	0	4.8128
212.25	3.2512	8.6784
178.509	0	15.8208
111.283	0	10.0352
78.464	0	4.5568
40.6016	0	2.1248
78.2592	0	3.0208
80	0	6.6048
96.3584	0	4.992
92.672	1.0496	5.2992
59.648	0	2.8416
97.5872	0	6.3488
263.859	0	19.3024
75.9808	0	3.7888
123.443	0	12.5184
110.285	0	6.784
103.373	0	8.6528
238.285	0.7168	21.6832
157.491	0.512	15.0528
3.8656	0	0
45.9008	0	3.8656
126.182	1.0496	5.248
126.157	0	4.6336
187.238	0.7168	13.4144
96.6656	0	5.3248
93.7216	0	5.2992
124.646	0	7.6544
60.288	0	3.5584
108.774	0	6.4256
26.6752	0	3.8912
159.232	0.768	7.68
3.4816	0	0
167.962	2.7904	11.6992
77.4656	0.6144	3.328
51.328	0	7.2448
63.0272	0	3.2
168.064	0.512	10.7264
220.979	0.64	12.6464
222.515	0	12.0064
113.715	0	5.2736
155.264	0	13.7728
45.184	0	4.8128
71.3728	0	1.7152
70.1696	0	2.6368
239.744	0.6656	19.3536
67.328	0	3.8656
411.034	4.8128	12.0576
81.6384	0	7.3984
117.402	0	5.6064
130.406	1.4336	4.5312
115.251	0	13.7216
58.112	0	2.304
76.4928	0	4.1728
77.5168	0	4.736
100.429	0	8.0128
86.3488	0	5.632
102.605	0	9.472
151.245	0	15.872
225.434	0.7168	15.744
145.715	0	13.44
335.002	0.7168	24.1664
739.507	0	67.6352
87.0656	1.4336	2.4576
96.8704	0	5.1712
146.739	0.7168	8.4736
127.232	0	6.6048
118.605	1.92	5.4016
212.147	0.9216	9.5232
101.99	0	8.448
78.336	0	1.408
84.6336	0	6.0672
341.043	0.8192	39.9872
73.984	0	5.3504
123.11	0	5.376
165.504	0.64	9.2928
43.9808	0	2.5088
83.5072	0	6.2976
249.395	0.4096	23.3472
62.3616	0	2.4576
124.57	0	10.2144
137.728	0	9.6256
57.2672	0	3.456
90.8032	0	5.4528
51.968	0	1.9456
92.4928	0	5.0944
28.2624	0	1.9712
135.706	0	10.2656
170.675	0	14.0544
112.026	0	8.2688
3768.24	121.498	236.774
81.3312	0	2.5088
191.334	0.768	9.856
133.786	0	10.1888
79.9744	0	3.968
98.3296	0	3.9168
208.205	0.9472	15.4112
14.0288	0	0.9984
63.872	0	2.5856
110.464	0	8.2432
107.571	0	6.9632
96.256	0	5.632
8.4736	0	1.792
116.147	0	8.4736
52.9152	0	1.7664
61.6448	0	2.7392
89.1136	0	6.3488
126.669	0.896	8.7296
278.272	1.5872	18.0224
50.3808	0	4.2752
3.7888	0	0
79.6672	0	4.0704
140.954	0	9.3952
101.76	0	5.248
345.011	0.5632	39.04
121.651	0.5888	8.3968
121.114	0	10.1888
132.992	0	9.9072
205.21	0	18.7648
3.2512	0	0
106.445	0	9.088
344.32	0	34.1504
75.6736	0	3.328
66.8928	1.9712	2.2016
678.118	3.3536	76.6208
77.4912	0.768	4.0448
5.4784	0	0
319.642	2.7136	27.264
100.71	0	6.3744
137.242	0	11.3408
102.554	0	3.456
62.6432	0	3.2512
86.7328	0	4.992
108.518	0	6.1952
100.838	0	11.0848
115.072	0	5.3248
72.9344	0	2.8416
36.6592	0	1.8176
87.168	0	3.7888
127.898	2.5344	3.9936
139.546	0.9728	10.0352
62.2336	0	3.0208
223.386	0	19.3536
246.938	0.64	41.216
189.517	0.5888	11.776
301.03	0.384	18.7136
99.2512	0	9.8048
192.589	0	17.7152
105.088	0	8.832
113.434	0	10.1632
54.3488	0	1.4336
89.1136	0.6144	4.352
174.234	0.8192	9.6512
78.3104	0	3.84
94.2336	0	6.4512
134.938	1.4592	5.1456
171.264	0	22.3744
111.514	0	8.3968
257.664	0	28.6208
252.621	0.7936	24.448
177.971	0	15.2576
133.222	0	13.312
25.216	0	4.3008
168.218	0	12.3648
86.0672	0	7.7056
140.851	1.1008	3.84
106.189	0	9.1136
154.496	0	17.3056
77.8496	0	1.2032
66.6624	0	5.5296
106.368	0.768	4.5056
100.813	0	6.4256
109.286	0	14.7712
85.4272	0	7.4496
15.1296	0	3.3536
555.085	5.4016	53.376
50.9952	0	3.4048
100.352	0	5.4528
76.3136	0	5.6832
59.0592	0	3.7632
52.1984	0	2.6112
7.8592	0	1.8944
94.6688	0	5.888
348.032	0	37.8624
97.2288	0	5.6832
14.5664	0	1.8432
58.7008	1.408	0
120.422	0	9.9328
69.6064	0	4.9664
54.528	0	2.6112
934.349	10.4192	48.8192
116.941	0	6.3744
104.243	0	7.1936
105.267	0	11.648
118.528	0	11.8272
141.517	0.512	7.7824
63.0528	0	3.5072
74.752	0	7.5008
144.742	0	15.5136
160.128	0	5.7344
4.9152	0	0
109.44	1.8432	5.2224
140.723	0	10.7008
100.198	0	6.784
92.0576	0	8.1152
120.73	0	6.6816
13.056	0	1.9968
179.174	2.0224	10.5216
205.107	0.5632	18.9184
111.411	0	10.1632
248.166	1.3824	15.744
29.0048	0	2.1248
117.581	0	9.0368
281.19	1.3056	17.6384
36.5056	0	1.4848
180.301	0	31.0528
110.95	0	4.8384
1746	12.1344	117.248
82.2528	0	6.1696
50.816	0	0
53.0944	0	2.0736
170.112	1.1776	8.2688
67.328	0	2.8416
188.544	0	9.8048
86.0672	0	2.7648
104.73	0	7.7312
146.099	0	6.0672
124.723	0	4.9152
5.7344	0	0.9216
48.9472	0	2.8928
117.837	0	7.1936
326.758	1.024	19.2
112.256	0	5.5296
445.645	3.6864	46.208
73.1136	0	5.6576
141.286	0.8448	8.32
79.2832	0	8.6528
198.579	0	18.304
89.5744	0	6.7072
222.387	1.152	15.5392
267.264	0.768	16.3072
129.869	0	9.7792
266.368	0.4864	15.8976
239.667	0.9216	20.1728
63.4112	0	3.7632
91.4688	0	10.2912
73.728	0	4.8128
307.866	0.6912	26.752
88.9344	0	5.4016
102.4	0	8.192
107.93	0	9.2928
129.869	0	4.736
158.08	0	13.056
79.1808	0	10.4704
74.6752	0	4.0448
3.328	0	0
188.237	0	16.1024
180.301	1.4848	11.1872
9.1904	0	0
123.034	0	9.984
152.397	0.8704	11.5456
61.7984	0	1.664
56.448	0	2.2528
107.034	0	8.5248
42.3424	0	2.7904
310.912	0	20.352
181.939	0	10.496
500.941	0	66.1504
79.5392	0	6.272
123.904	1.5616	6.7328
78.1312	0	2.2528
1828.45	66.3296	143.334
67.3024	0	7.168
205.824	0	19.2512
50.5856	0	2.3552
21.4784	0	0.9216
104.166	0	4.352
168.986	0	5.4528
129.024	0	7.8592
140.083	0	10.1888
91.4688	0	7.4496
147.584	1.7408	9.2416
232.243	0	14.6432
82.2528	0	4.224
103.322	0	9.344
58.0096	0	7.1424
4.0192	0	0
13.5936	0	0
138.163	0	12.7488
76.4672	0	2.4064
28.2624	0	4.2752
88.5504	0	6.4512
109.491	0	12.4928
92.1088	0	8.7808
86.6304	0	4.4032
164.096	0	12.5696
88.32	0	5.9136
27.2384	0	2.2272
300.134	2.5856	25.4208
74.5216	0	5.504
312.806	1.3568	21.2992
50.5344	0	2.304
121.549	0	5.6064
158.746	2.2784	6.912
59.2896	0	6.9632
170.394	1.1008	17.9456
68.4288	0	7.1424
73.1904	0	3.3536
90.0352	0	7.1424
83.328	0	4.352
3.3024	0	0
107.034	0	10.112
90.3168	0	7.6288
59.3664	0	2.56
71.68	0	4.4288
62.4128	0	4.736
16.9728	0	3.1744
344.602	0.6912	34.8672
844.646	2.944	94.7456
6.4512	0	0
239.718	0	23.3216
102.81	0	5.9392
67.7632	0	4.1472
82.56	0	6.9888
362.01	0	35.5328
115.302	0	9.216
58.0352	0	4.4544
52.096	0	2.432
173.952	0	12.3904
1717.2	24.576	129.766
96.0768	0	4.7616
126.106	0	7.68
55.168	0	4.2496
189.926	0	12.0832
191.078	1.5616	7.168
2031.31	25.3952	141.594
94.336	0	6.8352
3.3024	0	0
59.3408	0	2.304
132.557	0.4864	9.6256
85.1968	0	4.5312
302.899	0	25.216
95.6416	0	5.4528
66.2016	0	3.7376
86.912	0	4.992
96.8704	0	8.5248
78.5664	0	5.9904
78.5152	0	6.144
100.326	0	7.5776
65.408	0	5.7088
215.808	0	34.7136
55.808	0	2.4832
94.5152	0	6.8864
73.088	0	4.6592
67.1488	0	5.9136
147.123	0	13.1328
165.453	0	9.1392
100.685	0	10.9056
32.4864	0	6.016
129.792	0	9.8304
345.139	0	25.1136
6.3232	0	0
81.0496	0	5.888
81.8176	0	5.888
190.131	0.896	11.4688
136.781	0	6.7328
61.3888	0	1.8944
82.2272	0	6.9376
130.432	0	8.0128
78.3104	0	5.0432
302.234	1.152	23.9104
290.739	0.7168	20.5824
123.827	0	7.296
28.2368	0	3.2
103.014	0	7.1424
105.933	0.9984	4.5824
480.922	2.8416	39.5008
6.8352	0	1.92
107.29	0	6.016
69.3504	0	3.8656
252.16	0.0768	27.5456
80.128	0	5.9392
10.0096	0	1.7664
54.6816	0	3.0464
130.202	0	11.904
131.738	0	12.416
65.6896	0	3.2256
83.712	0	7.0144
167.501	0	14.5408
96.384	1.4848	2.048
70.0928	1.6896	1.0752
50.304	0	2.5344
219.136	0	25.344
52.2496	0	7.3472
99.6352	0	9.8048
73.344	0	3.7888
7.6544	0	0
93.4912	0	6.9376
52.7616	0	3.5072
157.03	0	12.3904
66.8416	0	5.1712
124.083	0.9216	7.7824
63.488	0	3.4048
98.5856	0	8.0128
112.256	0	11.0336
180.582	0.4608	14.0032
190.208	0	14.1568
4.8384	0	0
62.9504	0	3.1744
84.8384	0	9.5232
52.4032	0	3.0208
90.0096	0	4.0192
68.8128	0	4.1216
99.3024	0	11.392
123.597	0	12.2112
226.022	0	21.9136
100.07	0	7.1168
130.33	0.7936	8.9344
115.123	0	8.7552
109.798	0	8.064
119.219	0	10.9056
66.9696	0	3.712
76.1088	1.0496	2.688
80.768	0	9.2928
101.478	0.9472	3.5328
45.44	0	2.6368
145.408	0	14.0032
65.5872	0	3.3536
268.877	0	18.5856
201.702	0	16.64
34.816	0	1.4592
14.208	0	1.9968
110.208	0	2.7904
132.787	0	14.3616
76.8	0	4.864
64.1536	0	2.6624
180.07	0	5.632
114.739	0	7.936
163.2	0	3.2256
192.461	0	13.7472
92.1344	0	9.2672
180.122	0.4608	18.7136
104.474	0	6.0928
126.387	0	7.7824
200.397	0	12.5696
162.688	0	12.2624
66.56	0	2.2272
120.499	0.2048	11.52
98.6624	0	9.088
49.0752	0	3.9168
62.976	0	4.5312
101.939	0	5.2992
106.035	0	5.5808
135.885	0	14.3872
172.954	0	17.9456
116.89	0	11.52
76.3904	0	8.6784
162.278	0	14.1824
3.584	0	0
71.808	0	3.3024
77.0304	0	0.5376
72.2432	0	5.76
103.603	0.512	3.2256
349.005	0	37.0944
152.883	0.1024	10.0608
106.061	0	9.1136
221.338	0.5888	23.424
93.2864	0	6.0416
307.866	0.896	30.8224
131.558	0	7.6288
210.432	0	19.3792
141.696	0	11.6736
138.47	0	8.9344
92.544	0	5.8624
211.456	0	20.5824
105.779	1.3824	7.8336
64.6912	1.4848	2.048
66.3296	0	7.0656
324.813	0.4352	36.5824
218.061	0	13.952
327.603	0	30.464
70.4	0	3.9168
3.1232	0	0
4.5568	0	0
113.382	0	6.3488
188.979	0	16.4352
102.758	0	9.6
121.574	0	7.04
76.3392	0	5.4528
161.459	0	17.3824
39.296	0	3.2512
202.547	0	28.3648
65.152	0	8.1408
140.134	0	11.136
288.896	1.5616	23.2192
137.344	0	17.152
109.389	0	7.3216
113.126	0	13.0816
82.2016	0	6.4256
116.352	0	8.6016
142.643	0	7.936
257.664	1.3568	23.9616
142.976	0.6144	11.3664
57.2672	0	3.8144
196.89	0	23.0912
110.31	0	8.1408
99.1744	0	12.9536
244.378	0	17.6896
7.9616	0	2.2528
127.104	1.3056	5.3504
82.8928	0.6144	2.9696
79.3856	0	4.8128
175.744	0	8.4992
89.7024	0	1.8432
224.973	0	23.424
290.33	0	24.192
73.3952	0	4.4288
104.243	0	1.92
57.472	0	2.688
58.0608	0	7.552
95.36	0	5.2992
73.1136	0	4.608
148.557	0	12.0832
174.618	0	20.2496
82.6624	0	7.7312
35.9936	0	0.768
76.8768	0	3.9168
117.018	0	11.648
18.4576	0.896	0
1344.79	5.9136	90.0864
121.498	0	4.1216
126.899	0	10.2144
236.416	0	20.9664
133.274	0	8.3712
92.8256	0	5.0688
99.2256	0	6.1952
111.002	0	13.4912
125.21	0	9.8816
81.3568	0	5.5808
120.806	0	13.2608
5.12	0	0
204.16	0	16.64
133.171	0	6.5536
88.7808	0	7.6288
103.731	0	8.9088
258.842	0	21.7344
172.928	0	17.1776
95.104	0.64	5.9136
99.4304	0	7.2704
136.422	0.4096	11.904
106.547	0.5888	4.3776
85.7856	0	6.6048
376.627	0.9216	29.7472
177.306	0	7.1936
47.1552	0	2.5344
280.602	0.512	26.4192
286.413	2.0736	31.9488
139.75	0	8.2432
81.536	0	5.6576
2.7392	0	0
145.894	0	10.0352
67.0976	0.896	1.152
89.3952	0	1.3568
84.1472	0	5.0432
106.675	0	5.9648
81.2032	0	5.1712
109.107	0	0.2304
80.256	0	4.0192
18.2272	0	1.792
232.755	0.768	21.0944
88.2432	0	4.9408
7.6032	0	0.8448
57.088	0	3.3536
337.126	0	33.2288
164.608	0	13.8496
218.803	0	24.3456
140.928	0	10.3936
72.1152	0	4.0704
81.3568	0	4.9152
108.621	0	7.5776
133.248	0	13.6704
72.2688	0	4.5312
152.602	0	12.544
102.298	0	7.1168
90.3424	0	7.1936
66.5856	0	6.4
100.429	1.2288	6.7584
117.018	0	13.952
98.7904	0	9.5488
155.955	0	8.8064
746.342	0.9472	39.808
79.104	0	6.7584
229.837	0	22.5792
225.766	2.0736	17.0496
92.1088	0	10.0864
89.6512	0	0.3584
163.098	0	22.3488
100.966	0	7.7824
50.816	0	2.6112
66.8672	0	4.5568
7.6288	0	0
66.9952	0	2.5344
22.5024	0	0
48.9472	0	3.456
226.97	0	19.4048
29.5936	0	2.0224
59.8272	0	3.712
79.5392	0	6.7584
73.6512	0	6.144
533.376	1.664	45.8496
124.672	0	9.7536
101.299	0	7.1936
125.184	0	11.3408
85.4784	0	3.8912
58.5984	0	2.304
1384.78	15.2576	91.264
117.965	1.1776	5.9904
137.267	0.8192	5.6576
121.754	0.3072	7.296
68.992	0.5888	2.3296
329.011	1.5616	16.8704
150.989	0.3072	12.032
119.296	0	8.5504
137.114	0.256	7.6544
101.069	0	8.0128
86.8096	0.256	5.76
347.904	0.1536	23.7568
233.344	0	25.9072
179.738	0	9.6512
77.9008	0	6.0672
63.8464	0	18.6368
3.3024	0	0.1024
249.6	0.8704	21.0944
95.2064	0	4.5312
189.926	0	16.8448
94.1568	0	6.0416
314.112	1.024	23.4752
166.81	0	10.112
[truncated: 20,761 more rows]

## Sheet: Fig 3F raw p fluorescens
droplet_area	aggregate_area	live_ratio
9.1648	0.0768	1
25.3952	0.9472	0
23.1168	2.3808	0
23.8336	5.5808	0
47.7696	0.256	0
18.0992	1.28	0
17.92	3.2768	0
617.293	0.2048	0
617.293	37.7088	0
15.7696	1.3312	0
595.84	103.066	0
33.2544	2.2272	0
53.6576	10.4704	0
69.0432	16.5632	0
33.8176	6.6304	0
521.907	1.9712	0
521.907	26.5984	0
129.229	10.88	0.335958
60.4416	13.7216	0
64.256	16.6656	0
30.208	7.936	0
47.7696	5.9136	0
95.2064	9.7536	0
64.3072	8.192	0
617.293	4.0704	0
104.013	9.4208	0
28.2624	5.7088	0
60.1344	4.096	0
34.0224	5.7088	0
60.1344	4.5312	0
21.4528	4.608	0
32.0256	1.792	0
39.0144	2.944	0
521.907	4.7104	0
108.083	18.7392	0
33.7664	6.7328	0
595.84	5.76	0
595.84	2.9184	0
617.293	1.536	0
39.4496	2.1248	0
32.8448	5.2992	0
79.616	4.5312	0
79.616	4.7616	0
27.4176	3.8144	0
53.9904	15.4368	0
25.7792	4.2496	0
56.7296	2.9696	0
129.229	1.9456	1
27.4176	1.9712	0
86.656	15.7696	0
33.152	5.2224	0
95.2064	3.2512	0
33.9712	3.9424	0
104.013	4.1216	0
33.152	5.0688	0
40.8064	5.0944	0
595.84	0.9216	0
33.7152	7.3216	0
617.293	14.6176	0
41.2672	5.632	0
103.398	5.5296	0
91.7504	3.6096	0
595.84	8.0128	0
75.8784	14.9504	0
103.398	1.4592	0
129.229	5.4016	0
158.976	17.3312	0
521.907	3.4304	0
521.907	3.3792	0
51.968	2.8416	0
50.176	8.7808	0
50.56	8.1664	0
37.7856	2.6368	0
45.5424	6.7072	0
45.4656	3.2	0
34.2528	4.9408	0
38.1952	7.68	0
38.4512	6.016	0
51.968	0.4864	0
91.7504	4.7872	0
103.398	7.3984	0
31.8464	5.248	0
35.3024	2.3552	0
913.408	4.8128	0.153846
158.976	4.48	0
65.3056	12.5696	0
44.6208	5.5808	0
57.2928	4.3008	0
32.4352	5.2224	0
69.7088	7.68	0
34.7648	3.7888	0
65.3056	1.1264	0
58.9568	9.9328	0
69.7088	6.4512	0
45.1328	6.528	0
31.1808	2.7648	0
31.7952	2.816	0
32.5888	6.7584	0
91.7504	4.6848	0
32.64	2.7136	0
34.8672	2.5344	0
38.4256	5.9648	0
36.9408	3.2256	0
27.4176	2.7136	0
53.376	10.9056	0
31.2576	6.3744	0
30.9504	4.736	0
77.9264	3.9424	0
31.6928	5.1968	0
158.976	3.5328	0
99.5584	29.056	0
57.2928	5.248	0
48.3072	7.8336	0
158.976	3.0464	0
37.8624	8.1152	0
65.3056	4.2752	0
28.8256	3.6864	0
43.7248	7.8848	0
193.024	47.3088	0
49.0752	8.4736	0
30.4896	4.992	0
59.4688	1.1776	0
81.4592	12.6464	0
28.9536	3.6864	0
41.7536	4.736	0
77.9264	7.9616	0
1646.08	0.2048	0
42.5472	7.5008	0
77.7472	20.8384	0
36.992	2.3296	0
29.2864	5.76	0
37.4784	5.8112	0
41.3184	2.7392	0
1646.08	2.7648	0
51.9936	14.0544	0
81.4336	1.4592	0
81.4592	4.7872	0
913.408	4.352	0
323.507	99.8656	0
35.5584	3.1488	0
1646.08	0.0768	0
1646.08	16.1792	0
1646.08	426.957	0
44.4416	9.6	0
38.5536	6.0672	0
46.8736	2.0224	0
34.0224	6.016	0
34.176	2.2784	0
1646.08	0.0768	0
105.037	4.1984	0
81.4336	0.5376	0
39.1168	5.8112	0
54.3488	11.8784	0
38.272	3.456	0
54.9376	8.3712	0
161.536	35.7888	0
1646.08	3.3024	0
32.0256	2.7136	0
105.037	2.3808	0
1395.4	5.248	0
64.6144	4.9664	0
1646.08	3.1744	0
39.3728	5.9136	0
40.7808	8.8064	0
913.408	4.2496	0
37.888	5.7344	0
64.6144	4.4544	0
102.4	19.2512	0
41.6256	6.6304	0
75.9296	19.584	0
59.3664	14.2336	0
1646.08	0.256	0
40.9088	2.8928	0
43.264	5.9136	0
70.1184	16.3584	0
36.0448	6.4	0
1395.4	135.782	0
70.2208	10.3424	0
37.7344	5.3504	0
161.536	3.6608	0
71.2192	9.6	0
104.525	1.2544	0
55.5008	10.496	0
71.2192	1.3824	0
1646.08	1.0752	0
102.4	2.304	0
98.3808	29.2096	0
47.488	9.5744	0
26.3168	9.5488	0
39.936	5.6576	0
36.352	7.68	0
1646.08	0.0768	0
70.2208	3.5328	0
74.8544	13.8496	0
1646.08	1.1776	0
49.6896	9.344	0
1395.4	5.1456	0
44.3904	6.528	0
1646.08	4.352	0
29.952	5.4016	0
637.133	8.6784	0
73.984	3.2	0
1378.56	1.8944	0
637.133	11.2384	0
35.9424	2.3552	0
637.133	15.2576	0
45.824	11.2384	0
1646.08	0.9728	0
1395.4	5.4528	0
36.8896	2.5088	0
73.984	5.7088	0
35.9168	2.3296	0
38.2976	6.528	0
30.5664	5.7344	0
31.4624	4.8896	0
29.0816	2.8928	0
1378.56	236.851	0
1395.4	5.0688	0
1646.08	1.0496	0
1378.56	2.944	0
26.112	5.0944	0
637.133	2.4832	0
35.7376	6.7328	0
30.6688	5.6064	0
1395.4	1.3824	0
637.133	6.3232	0
34.3808	6.0672	0
43.8016	6.016	0
1395.4	1.5616	0
33.6128	6.1184	0
637.133	13.6448	0
32.0512	4.4544	0
1395.4	1.9456	0
30.5664	13.0304	0
1646.08	5.3504	0
48.8448	6.1184	0
58.5984	9.0368	0
45.1584	4.8128	0
1395.4	10.4448	0
1646.08	2.8672	0
40.2176	9.7792	0
637.133	3.6864	0
1395.4	1.9968	0
35.8912	4.352	0
1395.4	1.7408	0
39.4496	2.6368	0
1378.56	0.1024	0
637.133	30.9248	0
41.2672	5.9648	0
1395.4	0.128	0
73.1648	16.7168	0
47.3088	7.936	0
465.075	13.2864	0
1395.4	0.896	0
47.1552	7.9616	0
145.459	30.8224	0
1378.56	4.224	0
1395.4	3.0208	0
1182.87	163.507	0
34.56	3.0464	0
39.8592	0.7168	0
34.4832	7.0656	0
1182.87	3.2768	0
145.459	6.9888	0
1378.56	2.7392	0
31.744	5.7856	0
43.52	6.8608	0
34.3552	4.608	0
47.4112	7.168	0
1646.08	1.2544	0
46.9248	11.9296	0
38.2208	2.4576	0
47.6672	4.7616	0
1378.56	0.0512	0
1395.4	4.6336	0
62.5664	6.4768	0
1395.4	14.1824	0
1395.4	1.8944	0
104.115	26.6496	0
1395.4	1.8688	0
1378.56	2.4832	0
1395.4	0.4608	0
78.8992	17.6128	0
1395.4	0.256	0
1182.87	1.536	0
48	7.0912	0
1646.08	7.3216	0
32.9216	6.1696	0
33.5616	6.0672	0
1646.08	0.2048	0
1646.08	0.6912	0
39.9872	4.0704	0
1395.4	1.408	0
637.133	0.0768	0
35.6608	1.4848	0
70.6048	4.5568	0
31.104	2.9952	0
637.133	1.3056	0
98.2528	25.5232	0
1395.4	3.9424	0
1395.4	8.3712	0
70.6048	7.9872	0
1646.08	0.9472	0
157.645	2.9952	0
43.136	4.224	0
33.9712	1.8944	0
26.5472	2.8416	0
637.133	1.152	0
1646.08	9.7536	0
21.12	3.3024	0
1378.56	1.28	0
637.133	4.0704	0
33.6384	5.7856	0
74.8288	18.1504	0
1378.56	0.9472	0
20.7872	3.8912	0
465.075	59.392	0
1378.56	0.3328	0
157.645	13.3376	0
47.3088	6.0928	0
282.65	3.072	0
360.243	89.7024	0
83.2	15.5392	0
28.16	4.4032	0
1378.56	7.8592	0
157.645	6.1952	0
465.075	7.4496	0
1395.4	0.1536	0
32.9984	8.7296	0
32.2304	5.0176	0
40.6784	4.6592	0
1395.4	23.7312	0
69.1712	2.6368	0
26.1376	3.5584	0
282.65	78.4384	0
465.075	1.28	0
1182.87	31.36	0
36.3264	4.4032	0
1378.56	0.768	0
37.9904	2.9696	0
43.776	3.84	0
53.2224	8.192	0
21.6576	2.56	0
40.576	4.5568	0
1182.87	2.6368	0
1378.56	6.0672	0
30.1824	5.0688	0
35.1232	4.48	0
89.9072	17.792	0
1182.87	4.352	0
42.7776	3.3792	0
1395.4	14.0032	0
32.3584	4.224	0
36.992	2.2528	0
360.243	61.5168	0
555.008	10.2656	0
555.008	149.606	0
36.7616	5.5808	0
69.1712	7.9872	0
1182.87	1.2544	0
38.3488	5.7088	0
1182.87	0.3328	0
28.672	5.1968	0
38.0672	8.6272	0
1182.87	1.3824	0
1182.87	1.1264	0
35.6352	2.4576	0
34.3808	3.7888	0
1182.87	8.0384	0
52.1984	14.5664	0
57.6	8.192	0
40.6016	5.4784	0
89.9072	3.2512	0
25.344	7.2704	0
53.9136	4.9408	0
32.6144	5.1712	0
38.9632	8.4992	0
38.8352	1.9456	0
1182.87	2.4576	0
64.9984	7.6032	0
33.28	5.8624	0
47.36	3.9936	0
109.389	36.5312	0
58.752	6.2208	0
282.65	2.9696	0
1182.87	3.0208	0
53.9136	5.8368	0
76.3392	13.8496	0
41.2416	4.5312	0
42.9568	6.2976	0
44.6976	6.784	0
58.9824	11.5968	0
56.7296	6.0672	0
36.1984	2.4832	0
74.24	5.7344	0
33.0496	1.28	0
31.2576	5.8112	0
59.776	13.7472	0
109.107	5.12	0
26.112	2.432	0
111.565	26.496	0
53.2736	9.1392	0
64.9984	1.0752	0
50.9184	2.7648	0
28.8768	5.3248	0
109.107	18.8672	0
74.24	1.9968	0
30.1824	4.9408	0
74.24	1.5104	0
12086.1	0.1024	1
36.0704	3.1232	0
555.008	1.8432	0
37.12	5.6064	0
52.736	7.2704	0
12086.1	2.2784	0
52.3776	11.2128	0
37.376	4.352	0
714.829	3.2256	0
35.7632	1.664	0
31.9488	5.5296	0
12086.1	3.0464	0
46.7456	7.3728	0
533.248	103.526	0
36.864	6.7328	0
87.9872	13.6192	0
36.7104	5.0176	0
59.9808	12.416	0
76.9536	20.2752	0
51.84	8.6016	0
16.7936	0.9216	0
147.738	14.8224	0
39.7568	8.448	0
12086.1	101.581	0.0144124
39.3984	8.7296	0
110.464	6.528	0
714.829	3.2	0
37.7344	4.3264	0
714.829	3.4048	0
70.6816	15.2576	0
533.248	10.624	0
35.6608	6.3744	0
62.5152	12.3904	0
714.829	148.531	0
114.56	13.4656	0
40.5248	5.76	0
110.464	4.096	0
123.725	34.6368	0
45.184	8.2176	0
33.5104	6.3232	0
33.28	7.2704	0
39.3472	6.6048	0
31.7696	4.1216	0
114.56	11.1872	0
147.738	21.4528	0
32.8704	4.3008	0
37.12	4.608	0
126.566	11.6224	0
35.328	4.6592	0
31.0528	5.504	0
39.5264	7.4752	0
58.2912	14.464	0
53.376	11.8272	0
33.3568	6.1184	0
533.248	17.4336	0
47.8976	8.1152	0
78.8992	5.1456	0
40.1152	7.04	0
35.968	8.2432	0
27.1872	4.5824	0
31.0016	6.9888	0
36.1472	3.1232	0
12086.1	4.8896	0.0404624
12086.1	1.792	0
85.2992	23.168	0
105.293	16.2816	0
38.2464	8.1664	0
69.0432	1.408	0
75.0592	21.2224	0
33.152	3.3536	0
33.8944	2.9184	0
12086.1	57.9328	0
145.818	16.9216	0
12086.1	9.6512	0
69.0432	8.704	0
145.818	10.4448	0
49.024	7.5776	0
533.248	4.4544	0
277.222	15.744	0
34.0224	4.1728	0
52.8128	6.7328	0
30.9504	6.1184	0
78.8992	6.016	0
17.3568	3.9424	0
40.2944	7.0912	0
32.3584	5.1456	0
12086.1	0.1792	0
38.6048	7.9872	0
28.5696	4.7104	0
40.0896	12.416	0
63.1808	12.544	0
40.4224	5.2992	0
65.8944	3.6352	0
36.096	4.096	0
12086.1	267.238	0.000452967
105.293	3.4816	0
33.0752	4.224	0
34.9696	7.1936	0
12086.1	1.8944	0
37.1712	6.3744	0
133.811	27.2384	0
28.5696	7.4752	0
72.1152	6.0416	0
65.8944	6.1184	0
133.811	0.7936	0
39.1424	5.8624	0
277.222	2.5856	0
119.578	30.4384	0
12086.1	27.008	0
50.6624	7.0912	0
45.3632	8.9344	0
277.222	7.3216	0
28.0064	4.9408	0
714.829	0.4864	0
72.1152	8.7552	0
277.222	13.8752	0
118.144	22.3744	0
12086.1	71.04	0.0120419
31.3344	4.9408	0
34.7136	2.9696	0
56.704	5.2736	0
277.222	8.7552	0
31.1552	2.3296	0
66.6368	1.8944	0
33.8176	3.1744	0
146.765	10.2912	0
12086.1	5.0176	0
322.406	16.8192	0
66.6368	5.4528	0
12086.1	6.7584	0
119.654	29.1072	0
277.222	0.9728	0
36.5824	2.8672	0
58.1888	11.8528	0
12086.1	0.128	0
40.4224	3.8912	0
71.808	7.7824	0
76.6208	1.9456	0
44.7488	4.1472	0
33.664	3.7376	0
39.8848	3.2512	0
28.288	1.6896	0
41.3184	8.32	0
76.6208	7.5008	0
714.829	1.7408	0
78.0032	6.7328	0
23.7056	3.9936	0
12086.1	11.1104	0
35.712	5.12	0
12086.1	5.5296	0
72.448	17.4848	0
322.406	9.472	0
54.8864	10.9568	0
322.406	5.0944	0
38.272	7.68	0
12086.1	3.2768	0
62.4384	2.9184	0
146.765	26.1376	0
12086.1	9.9328	0.0329341
12086.1	0.0768	0
67.6352	19.3536	0
220.518	9.2416	0
30.3872	3.4816	0
60.1088	7.6544	0
12086.1	0.5632	0
42.8032	2.8416	0
637.056	3.3792	0
61.4656	23.9616	0
12086.1	2.048	0
12086.1	2.2784	0
71.808	1.7408	0
78.0032	7.5264	0
322.406	0.896	0
108.237	14.1312	0
12086.1	5.3248	0
30.7456	4.4288	0
12086.1	0.256	0
105.395	22.3488	0
105.395	2.944	0
159.923	30.9504	0
46.5408	6.3232	0
31.9488	5.12	0
36.7616	7.9872	0
41.0624	8.064	0
62.4384	4.9152	0
43.6992	6.2208	0
35.8656	6.3232	0
56.704	16.5632	0
47.4112	3.584	0
42.0864	9.344	0
34.6368	2.048	0
40.1152	1.8688	0
97.2288	2.432	0
12086.1	26.0864	0.0033389
12086.1	3.6096	0
12086.1	560.435	0.00228094
322.406	36.9664	0
159.923	23.7568	0
53.7088	5.3248	0
714.829	9.9328	0
66.9952	27.6736	0
12086.1	0.1024	0
637.056	2.4064	0
70.0672	5.0176	0
34.176	2.304	0
63.7184	10.0352	0
58.24	11.1616	0
12086.1	8.1152	0
43.0592	9.6256	0
12086.1	0.2048	0
12086.1	8.6528	0
50.5344	3.84	0
108.237	1.536	0
97.2288	17.8432	0
12086.1	0.64	0
637.056	4.352	0
637.056	136.09	0
12086.1	0.256	0
12086.1	3.0208	0
637.056	2.688	0
12086.1	0.1024	0
12.7232	2.6112	0
66.048	8.7552	0
12086.1	2.3296	0
66.3808	16.9216	0
61.5936	10.8544	0
28.0576	6.0672	0
93.2352	8.1152	0
53.9392	6.016	0
93.2352	6.5536	0
35.328	2.7904	0
12086.1	3.8144	0
35.712	2.304	0
66.048	4.864	0
12086.1	1.1008	0
12086.1	0.1536	0
49.2288	10.7008	0
77.9776	8.064	0
53.1456	11.4944	0
2475.85	1.3568	1
32.1792	5.9392	0
84.4288	14.1824	0
21.8368	7.6032	0
34.8416	3.2512	0
67.3024	9.088	0
12086.1	2.176	0
12086.1	0.0768	0
77.1072	20.2496	0
491.802	144.922	0
57.6768	2.8672	0
41.088	6.272	0
12086.1	0.4608	0
2475.85	0.4608	1
70.2208	1.4848	0
84.4288	3.3024	0
45.568	8.9344	0
2475.85	1.9456	0
12086.1	3.584	0
38.9632	3.6864	0
57.6768	3.6864	0
77.9776	4.5312	0
38.1952	5.12	0
12086.1	2.048	0
2475.85	2.1504	1
12086.1	8.192	0
12086.1	2.56	0
2475.85	0.0768	1
41.0368	3.8656	0
160.563	9.0368	0.255906
100.045	16	0
684.672	1.3568	0
70.2208	6.1696	0
12086.1	1.536	0
12086.1	359.04	0.0130244
684.672	5.7088	0
2475.85	1.152	1
2475.85	1.1776	1
2475.85	0.5632	1
2475.85	34.816	1
160.563	0.6656	1
12086.1	0.0768	1
32.2048	2.0736	0
49.5616	8.6272	0
34.1504	4.48	0
31.232	2.1504	0
160.563	0.5632	1
35.5584	6.656	0
41.6512	9.9328	0
2475.85	0.7168	1
12086.1	3.8656	0
160.563	5.76	0
32.9216	1.7152	0
12086.1	0.256	0
2475.85	0.1792	1
12086.1	8.7808	0
1460.61	218.88	0
2475.85	4.1472	1
1460.61	5.2224	0
238.694	101.914	0
30.3616	6.1952	0
2475.85	2.2272	1
12086.1	1.536	0
39.7312	5.2992	0
12086.1	102.605	0
39.168	4.5056	0
41.8816	9.4208	0
684.672	158.234	0
160.563	0.3072	1
58.3424	1.6384	0
12086.1	0.896	0
2475.85	0.9728	1
58.3424	1.8176	0
504.371	96.5888	0
32.1536	2.8928	0
2475.85	1.024	1
59.2384	11.264	0
2475.85	1.792	1
12086.1	5.8368	0
34.5088	7.4496	0
71.552	5.7088	0
35.712	9.0112	0
2475.85	0.5632	1
53.8112	9.2672	0
29.2864	4.736	0
2475.85	1.0752	1
30.3872	2.9184	0
160.563	0.7936	1
12086.1	0.3584	0
596.838	80.1024	0
36.736	3.072	0
1460.61	4.1216	0
30.5664	1.5104	0
30.1056	6.2464	0
26.496	2.304	0
28.8512	3.7632	0
33.1008	5.1968	0
38.8864	2.176	0
29.4144	6.2976	0
46.08	7.6544	0
2475.85	0.7168	1
2475.85	0.896	1
33.2544	3.3536	0
89.0112	8.6528	0
2475.85	5.0688	0
1460.61	2.9184	0
2475.85	9.2928	1
596.838	3.072	0
65.6384	12.8512	0
89.0112	12.6208	0
37.8368	5.5552	0
122.675	3.7888	0
2475.85	11.648	1
65.3568	19.456	0
12086.1	0.128	0
33.8944	8.1152	0
37.4272	2.2784	0
12086.1	15.6416	0
12086.1	243.994	0
30.08	4.5568	0
684.672	1.7664	0
12086.1	0.1536	0
1460.61	10.5472	0
1460.61	3.6608	0
12086.1	0.7424	0
12086.1	9.728	0
12086.1	2.816	0
1460.61	0.0512	0
60.7232	18.3552	0
117.632	36.224	0
2475.85	0.1024	1
38.4	4.352	0
28.9792	3.9168	0
2475.85	0.6912	1
12086.1	146.688	0.0510563
12086.1	0.384	0
58.2656	16	0
1460.61	0.1024	0
47.232	9.2672	0
12086.1	9.1136	0
39.0912	8.7296	0
12086.1	13.1584	0
39.3728	5.7856	0
35.5072	2.8672	0
596.838	35.1744	0
2475.85	0.2304	1
55.424	8.2432	0
46.1824	8.2176	0
39.0912	7.6288	0
31.104	4.5312	0
72.4736	5.2224	0
31.2576	5.6064	0
1460.61	0.7424	0
2475.85	1.8944	0
22.8608	7.6288	0
684.672	0.9728	0
12086.1	0.9728	0
12086.1	1.3312	0
47.5392	3.8912	0
2475.85	4.608	0.302326
2475.85	0.1536	1
72.4736	11.4176	0
12086.1	0.128	0
56.0128	9.1648	0
2475.85	9.728	0.835897
12086.1	2.5856	0
30.464	6.3488	0
2475.85	0.0512	1
43.9296	7.3984	0
19.2768	1.6128	0
35.7888	8.704	0
42.8032	8.6528	0
30.208	4.9664	0
1460.61	0.8192	0
34.56	6.4	0
52.8128	7.7824	0
2475.85	0.4096	1
12086.1	16.384	0
56.3712	9.3952	0
30.8992	3.0464	0
596.838	0.8448	0
29.0048	2.816	0
1460.61	2.816	0
2475.85	2.4576	1
53.632	11.0592	0
33.7664	6.3232	0
596.838	2.8928	0
40.9856	8.2432	0
12086.1	39.296	0
37.4272	8.7296	0
2475.85	1.2544	1
36.7616	2.4576	0
32.1536	5.5296	0
1460.61	3.6096	0
192.742	32.2304	0
53.4784	7.8592	0
40.5504	6.656	0
235.29	46.6688	0
139.213	28.2112	0
16.3584	4.1216	0
14.8736	0.2816	0
33.3824	7.0656	0
2475.85	1.5104	1
2475.85	2.4576	1
12086.1	0.7168	0
12086.1	0.8448	0
32.0256	4.1728	0
12086.1	2.9184	0
2475.85	0.9472	1
12086.1	5.2224	0
12086.1	1.1264	0
1460.61	0.1792	0
33.5104	8.3968	0
2475.85	13.0304	0.508163
65.3568	6.912	0
12086.1	1.1008	0
192.742	2.4064	1
41.728	7.5264	0
1460.61	2.816	0
50.5088	10.0864	0
47.616	13.9008	0
34.1504	7.2448	0
33.6384	6.3488	0
33.8688	2.7904	0
2475.85	2.7648	1
52.4288	8.9088	0
139.213	5.6576	0
12086.1	9.6512	0
2475.85	1.2544	1
38.144	5.5296	0
58.6752	4.096	0
58.6752	6.2464	0
37.8624	0.256	1
35.584	1.1008	0
12086.1	0.5376	0
36.7872	8.448	0
2475.85	4.6592	1
12086.1	3.3024	0
120.934	27.8784	0
12086.1	36.4032	0
38.8608	15.6928	0
12086.1	4.864	0
235.29	6.0416	0
65.3568	5.632	0
137.728	27.264	0
12086.1	0.256	0
12086.1	2.2016	0
2475.85	3.7376	1
12086.1	1.6128	0
45.7984	3.6096	0
46.848	11.1104	0
55.936	10.6496	0
23.3216	5.4016	0
2475.85	6.2976	0
24.96	2.9184	0
121.728	5.8112	0
35.712	3.456	0
99.584	18.3296	0
43.0336	6.0672	0
34.3552	3.4816	0
12086.1	0.0512	0
38.7328	6.4	0
35.5328	4.6336	0
31.232	4.4032	0
12086.1	4.3776	0
23.1936	2.9696	0
43.7248	5.7344	0
12086.1	2.5088	0
57.2928	13.5168	0
53.2224	12.5184	0
12086.1	0.768	0
39.7056	8.576	0
36.3776	5.3248	0
81.6384	3.4816	0
37.3504	8.2176	0
87.5264	1.7408	0
36.992	2.0992	0
67.968	14.208	0
12086.1	10.9568	0
121.728	21.5552	0
137.728	6.4768	0
58.624	11.1616	0
81.6384	5.248	0
114.202	26.4192	0
60.1856	9.216	0
50.7136	6.528	0
56.064	7.8848	0
12086.1	1.664	0
34.4064	6.6816	0
67.7632	14.0288	0
36.4544	4.224	0
12086.1	69.248	0
87.5264	3.5328	0
45.4912	3.7888	0
36.864	1.152	0
32.2048	3.6352	0
41.344	6.2976	0
38.0672	8.8832	0
30.7712	6.656	0
54.4768	9.8816	0
94.72	20.5568	0
27.8272	4.224	0
27.2128	2.2016	0
81.6384	5.632	0
61.0048	11.3664	0
47.5136	6.784	0
33.792	7.8848	0
40.2944	6.4256	0
12086.1	12.1856	0
44.9792	6.9632	0
1710.18	132.659	0
29.2608	6.272	0
38.0928	8.1664	0
76.4416	19.0976	0
30.5664	6.7072	0
56.6528	8.192	0
73.8048	9.6512	0
41.5488	7.936	0
59.3152	11.7248	0
58.5216	17.0496	0
31.7184	5.76	0
31.2832	5.504	0
63.616	5.9648	0
32.3072	7.3984	0
12086.1	3.0208	0
35.9168	6.3488	0
32.128	3.3536	0
59.1104	15.36	0
37.6064	5.6576	0
12086.1	0.1792	0
58.0096	13.9776	0
35.0976	4.3776	0
48.3584	12.0576	0
63.616	7.6288	0
54.912	11.264	0
45.9264	5.9136	0
35.7888	2.816	0
46.9504	7.8336	0
82.8672	20.4544	0
12086.1	0.7424	0
12086.1	27.5712	0
41.2416	6.4256	0
66.4832	11.648	0
27.5712	1.6896	0
358.707	122.112	0
48.896	5.1968	0
38.9376	3.8656	0
61.312	11.8272	0
44.6464	6.016	0
30.5664	5.1456	0
63.5136	10.7776	0
49.9712	14.464	0
67.0208	15.4368	0
148.301	29.312	0
35.4048	0.3328	1
1710.18	1.7152	0
33.8176	4.3008	0
12086.1	26.3424	0
35.072	3.968	0
42.7776	7.1936	0
1710.18	0.6912	0
1690.04	1.6384	0
67.7632	7.5264	0
41.1136	7.1168	0
21.8368	6.2208	0
950.733	2.2016	0
1710.18	0.0768	0
29.2608	0.0512	1
32.8704	5.4272	0
77.568	22.5792	0
33.7408	2.7648	0
90.368	5.9904	0
1710.18	10.7008	0
358.707	7.424	0
1710.18	1.2032	0
481.613	10.0352	0
28.1088	3.6352	0
950.733	13.8496	0
1710.18	2.8416	0
148.301	5.0432	0
46.1568	9.8816	0
28.7232	5.248	0
38.8352	3.84	0
36.1216	6.656	0
32.3072	8.96	0
950.733	179.302	0
20.1472	4.48	0
950.733	0.1792	0
84.7872	6.4512	0
84.7872	7.3472	0
59.904	2.816	0.205128
36.6848	7.808	0
1710.18	1.4592	0
36.7872	11.2128	0
141.133	1.3056	0
32.4864	5.4272	0
1690.04	260.07	0
22.8864	0.2816	0
141.133	9.8048	0
1710.18	0.1024	0
1710.18	0.4352	0
37.3248	5.9392	0
1710.18	0.6912	0
1710.18	0.2048	0
90.368	12.8512	0
56.9344	14.3104	0
29.5936	1.536	0.0169492
59.904	3.5584	0
30.2336	3.5328	0
35.1488	5.4272	0
1690.04	1.8944	0
481.613	7.2704	0
69.888	15.5648	0
30.6432	3.1744	0
37.7344	3.6352	0
1710.18	215.706	0
48.2816	1.8176	0
31.1808	5.1968	0
87.6032	19.6608	0
141.133	16.64	0
1710.18	10.5728	0
1710.18	1.536	0
30.9248	2.7904	0
57.6	10.5728	0
35.7632	5.6576	0
23.3728	4.5056	0
49.92	11.136	0
1690.04	3.5072	0
43.3152	4.736	0
42.5216	8.1408	0
950.733	4.0704	0
50.7392	13.8752	0
60.544	12.9024	0
144.819	0.9472	1
29.1328	5.8112	0
169.37	42.5216	0
38.9888	7.68	0
6135.91	25.8816	0.610714
50.6112	5.8112	0
6135.91	1.408	1
950.733	0.4864	0
29.5424	6.5536	0
33.2544	6.7072	0
59.6736	9.6256	0
6135.91	1.3312	1
118.272	23.0656	0
83.2768	5.0176	0
6135.91	7.2192	0.262548
30.3872	8.1664	0
83.2768	5.9648	0
950.733	9.088	0
1690.04	2.4576	0
481.613	6.3232	0
1710.18	3.8912	0
48.1024	7.9104	0
45.6704	3.9936	0
28.672	3.584	0
32.0768	3.328	0
1690.04	1.5872	0
39.2704	9.1648	0
29.1328	7.6544	0
169.37	4.1216	0
1710.18	27.9552	0
47.872	8.4224	0
34.7904	2.5088	0
6135.91	7.7312	1
43.9552	6.2208	0
47.0016	9.216	0
34.5344	7.4496	0
56.7296	8.4992	0
56.8576	9.0112	0
63.0784	13.0304	0
950.733	0.6912	0
1710.18	24.3968	0
6135.91	1.5616	1
139.187	9.6768	0
49.28	13.44	0
1690.04	6.1696	0
6135.91	0.9984	1
6135.91	0.2816	1
950.733	0.3328	0
35.4304	7.7312	0
128.742	1.9456	0
6135.91	1.024	1
43.2128	7.936	0
95.4624	27.1872	0
118.272	6.656	0
139.187	7.2704	0
6135.91	3.9936	1
44.6208	10.112	0
37.4016	2.9696	0
6135.91	0.0768	1
33.2032	6.4512	0
42.0608	2.2016	0
40.1152	7.3472	0
1710.18	1.5104	0
6135.91	1.2032	1
53.8624	8.3968	0
1690.04	10.4448	0
128.742	20.864	0
6135.91	0.1792	1
35.4304	7.1168	0
35.8656	2.432	0
6135.91	12.5952	0.0941423
1710.18	5.3248	0
37.12	5.6064	0
50.0224	6.784	0
6135.91	6.528	0
139.187	20.7616	0
6135.91	1.408	1
38.4256	6.6304	0
43.9808	3.9424	0
1710.18	25.472	0
1710.18	4.608	0
1710.18	29.4656	0
230.886	8.6016	0
37.4016	6.8608	0
6135.91	0.6912	1
32.3072	7.8336	0
55.6544	9.0368	0
6135.91	0.7168	1
97.0496	24.064	0
40.576	8.3456	0
6135.91	233.037	0.677153
32.1792	0.1536	0
125.184	38.2976	0
230.886	8.5248	0
216.55	22.3232	0
6135.91	1.3056	1
33.0752	7.8592	0
39.7312	2.9696	0
39.3984	6.7584	0
6135.91	0.5632	1
41.2672	7.2704	0
34.0224	3.9424	0
37.6064	6.6304	0
36.5568	1.9968	0
56.6784	10.1888	0
61.8496	18.7392	0
31.5648	7.1424	0
125.901	5.3248	0
230.886	10.3936	0
28.7488	3.6608	0
62.4128	6.7328	0
6135.91	0.4352	1
119.936	9.0112	0
41.088	8.7552	0
230.886	26.1376	0
79.0272	13.0048	0
216.55	9.3696	0
164.864	10.2912	0
36.2496	7.6288	0
46.2336	7.4752	0
30.6688	6.7328	0
32.4096	5.2992	0
33.792	7.3216	0
6135.91	0.9216	1
38.3232	2.4576	0
40.1152	5.1968	0
164.864	3.3792	0
42.496	9.4976	0
79.0272	6.2464	0
49.9456	8.576	0
79.104	20.1472	0
52.1472	14.08	0
35.0208	6.6048	0
38.2976	4.3008	0
6135.91	0.3072	1
125.901	3.0976	0
6135.91	1.0752	1
119.936	20.7872	0
6135.91	0.5376	1
39.0912	5.5808	0
54.272	8.448	0
125.901	22.3232	0
164.864	5.6064	0
47.4624	9.6512	0
46.976	10.3936	0
32.4608	4.096	0
86.0928	21.9648	0
37.0688	8.2176	0
34.7136	7.4496	0
164.864	10.6752	0
31.5648	7.2704	0
44.2112	8.3456	0
34.9696	6.3232	0
34.7648	1.8432	0
63.0016	1.9712	0
164.864	0.2304	0
32.7936	1.4848	0
23.2192	3.84	0
122.419	33.6128	0
33.5616	5.9392	0
65.2544	17.664	0
42.8544	7.6032	0
2190.31	18.048	0
6135.91	4.7872	0.0698925
62.8992	15.4368	0
58.3424	5.0432	0
63.0016	1.9712	0
6135.91	1.7152	1
6135.91	2.0224	1
36.8896	6.8096	0
90.7008	3.84	0
42.752	5.888	0
2190.31	5.7856	0
72.8832	17.664	0
678.144	8.4224	0
31.6672	6.272	0
42.0608	7.3216	0
6135.91	0.9728	1
134.17	25.472	0
31.8976	5.7856	0
40.5504	8.0384	0
6135.91	1.0752	1
34.0992	5.1456	0
2190.31	5.9136	0
82.2016	12.3392	0
678.144	137.011	0
47.5392	4.096	0
2190.31	4.096	0
37.6832	6.784	0
134.17	10.7264	0
98.3552	5.248	0
33.2032	5.0944	0
215.373	7.9616	0
30.4384	8.0128	0
6135.91	1.024	1
2190.31	19.6608	0
90.7008	7.3728	0
215.373	5.8624	0
678.144	11.008	0
60.7232	4.5312	0
38.6304	8.3968	0
42.0352	5.76	0
39.6288	3.9168	0
18.4832	2.4064	0
6135.91	0.64	1
6135.91	1.6384	1
6135.91	0.6656	1
40.6784	3.1744	0
31.4624	5.4272	0
38.144	8.2432	0
49.0752	6.7584	0
2190.31	14.8224	0
215.373	1.024	0
36.8896	6.5792	0
215.373	25.6512	0
31.4368	4.3008	0
98.3552	9.9328	0
6135.91	4.4544	1
32.4864	7.5008	0
54.0416	10.0352	0
60.7232	7.7312	0
27.8784	5.6576	0
49.2544	10.5472	0
72.5248	10.7008	0
6135.91	2.8928	1
41.8048	8.832	0
49.9712	12.9536	0
34.1504	7.2704	0
41.5232	4.6336	0
6135.91	1.1776	1
39.1424	7.4496	0
678.144	0.384	0
55.8848	14.3616	0
6135.91	0.5632	1
30.5664	4.1472	0
6135.91	225.741	0.790344
6135.91	0.64	1
524.339	1.7664	0
47.3856	8.064	0
31.4624	3.9936	0
6135.91	1.2032	1
6135.91	0.5376	1
59.5712	12.7744	0
524.339	2.3808	0
2190.31	228.762	0
33.5872	4.224	0
54.1696	6.9376	0
2190.31	14.7456	0
31.6672	4.2752	0
43.6224	9.8048	0
524.339	106.24	0
51.6352	8.7296	0
6135.91	3.6608	1
76.1344	13.9776	0
718.234	19.2	0
53.0432	10.9312	0
35.3024	3.0464	0
47.104	12.1088	0
37.4784	3.3024	0
33.8432	3.4816	0
718.234	11.4432	0
2190.31	0.7936	0
38.016	2.6368	0.155556
678.144	4.9664	0
2190.31	0.896	0
53.5296	12.6464	0
43.2384	5.4016	0
173.158	10.0864	0
101.427	29.44	0
6135.91	1.408	0.302326
30.6432	5.8368	0
6135.91	1.2288	1
37.1712	3.2768	0
2190.31	2.176	0
173.158	1.28	0
6135.91	17.6896	0.941532
29.2608	5.2992	0
64.0256	15.4624	0
31.5904	2.0224	0
183.296	12.416	0
2190.31	18.2784	0
40.576	9.0624	0
58.2144	11.0848	0
118.656	27.264	0
52.7616	9.1392	0
41.0624	8.2688	0
69.376	17.3056	0
165.658	52.6848	0
6135.91	10.8288	1
55.5776	4.2496	0
6135.91	0.5888	1
2190.31	3.84	0
73.3952	16.3328	0
6135.91	1.28	1
173.158	2.7904	0
31.0272	4.6848	0
49.5872	5.9904	0
524.339	0.8448	0
68.0448	14.6688	0
51.6352	7.04	0
36.7872	4.4544	0
55.5776	2.56	0
36.5312	6.1952	0
33.536	4.864	0
718.234	136.115	0
183.296	9.6512	0
32.2304	3.712	0
36.6336	4.8384	0
35.7376	1.2288	0
68.6336	12.1344	0
31.616	2.048	0
32.2048	4.736	0
2190.31	2.432	0
173.158	4.5824	0
2190.31	0.128	0
28.1088	3.0208	0
38.6048	5.7856	0
50.9184	9.6768	0
31.6928	5.9136	0
42.8032	5.6064	0
6135.91	0.64	1
183.296	18.56	0
59.4688	9.8048	0
2190.31	2.9952	0
75.1872	8.2688	0
75.1872	1.536	0
45.2608	7.168	0
67.1488	13.2864	0
25.7792	5.6576	0
6135.91	20.7616	0.678049
43.0848	4.6336	0
34.2016	5.376	0
31.9232	2.0736	0
64.6912	6.2208	0
262.272	29.8752	0
98.2016	7.9616	0
84.1216	21.2224	0
28.032	2.2016	0
34.6112	6.1696	0
46.2592	9.9072	0
45.3888	6.7584	0
33.0496	5.5296	0
49.6896	8.576	0
28.9024	3.6096	0
33.6384	3.328	0
35.584	6.0672	0
34.7904	4.608	0
33.408	4.736	0
40.5248	6.8608	0
262.272	0.7936	0
98.2016	3.0464	0
64.6912	1.536	0
31.9488	0.7936	1
29.4912	3.6352	0
77.7728	11.8016	0
26.9568	1.5104	0
42.368	11.8272	0
718.234	4.0192	0
33.7152	3.6608	0
33.0752	5.6832	0
50.7904	15.9232	0
102.886	5.8112	0
35.5072	3.6352	0
74.4704	4.096	0
262.272	5.5808	0
262.272	1.6896	0
35.4816	3.456	0
98.2016	5.4528	0
36.4544	2.2528	0
21.2224	1.408	0
53.9648	3.0976	0
279.654	26.6752	0
53.9648	3.7632	0
31.9744	2.432	0
46.3872	8.0896	0
74.4704	6.1952	0
26.5984	5.2736	0
262.272	3.9424	0
56.704	10.6496	0
70.4	14.5408	0
68.0704	10.1632	0
150.81	44.544	0
38.2208	6.784	0
30.4128	3.2768	0
64.6656	11.2384	0
102.886	14.336	0
64.3072	17.8432	0
31.1552	5.1968	0
30.336	5.632	0
72.0384	0.2816	1
37.0176	2.5344	0
31.0784	5.888	0
173.722	14.4128	0
32.1536	2.3808	0
30.1056	1.536	0
34.6368	8.2944	0
37.0176	4.0448	0
48.6912	4.4032	0
56.2944	9.8048	0
21.8624	6.0672	0
34.048	4.1984	0
72.6784	2.0224	0
25.4976	0.6912	0
39.552	3.4304	0
36.4032	7.296	0
50.8928	9.5232	0
37.1968	4.5312	0
173.722	34.2784	0
60.8512	3.9936	0
72.6784	6.272	0
661.581	8.0384	0
37.248	2.944	0
29.7984	3.5584	0
42.3168	8.6272	0
60.8512	2.7136	0
186.24	13.952	0
51.6608	9.6	0
32.6912	2.2016	0
67.1744	13.5424	0
710.81	3.1232	0
153.677	14.8736	0
153.677	6.6048	0
661.581	4.1728	0
39.7568	5.6064	0
624.742	1.664	0
82.3552	20.7872	0
661.581	1.7152	0
30.4896	5.1968	0
49.5872	5.2992	0
710.81	0.3584	0
57.8816	12.3904	0
710.81	0.7168	0
33.2544	4.5824	0
33.6384	4.8896	0
63.872	10.752	0
36.0192	6.2208	0
661.581	1.7152	0
661.581	125.798	0
35.5072	2.4832	0
710.81	2.56	0
18.4576	0.6656	0
710.81	24.448	0
37.5552	2.7904	0
42.5984	6.016	0
710.81	1.792	0
186.24	21.1456	0
97.408	8.3968	0
624.742	9.6256	0
710.81	6.016	0
32.9216	6.656	0
58.624	12.16	0
710.81	0.768	0
65.9456	13.7472	0
39.0656	8.5504	0
35.584	1.92	0
661.581	3.3536	0
710.81	2.7136	0
32.512	3.9168	0
43.8784	2.6368	0
97.408	7.424	0
710.81	0.4096	0
661.581	0.0512	0
78.5152	7.7056	0
58.0608	11.5712	0
109.133	6.6816	0
710.81	0.128	0
36.1472	3.3792	0
661.581	1.7408	0
38.9888	6.4	0
39.6544	5.1712	0
34.048	5.1456	0
710.81	3.5328	0
89.8816	5.0688	0
36.5056	3.0464	0
710.81	3.9168	0
29.8496	5.3248	0
710.81	1.8688	0
42.88	7.1168	0
36.8384	8.448	0
92.4672	7.7824	0
32.6144	5.248	0
710.81	0.5376	0
37.6832	9.216	0
72.0896	4.5568	0
84.8896	19.3536	0
23.8848	4.0192	0
46.336	8.5248	0
89.8816	9.472	0
38.784	7.424	0
125.798	26.0096	0
31.2832	5.9904	0
78.5152	7.3984	0
109.133	10.7008	0
710.81	1.2544	0
710.81	26.6496	0
57.344	11.4944	0
92.4672	7.5776	0
38.1952	7.0656	0
710.81	5.632	0
49.664	7.7824	0
50.9696	5.7344	0
710.81	5.0176	0
45.056	6.144	0
72.0896	0.7424	0
51.1232	9.7792	0
41.1904	5.4016	0
35.9424	7.168	0
30.72	2.5856	0
125.798	4.3008	0
47.104	4.9152	0
111.155	22.7328	0
58.8288	7.1936	0
30.336	4.3008	0
104.038	22.0416	0
88.7296	21.5552	0
57.5744	6.1952	0
72.6016	9.3184	0
36.224	5.632	0
69.8112	2.8672	0
130.79	33.8944	0
71.5008	11.52	0
50.9952	7.0144	0
90.2912	19.3792	0
558.157	41.5744	0
69.8112	7.9872	0
50.176	7.808	0
33.1264	3.0464	0
54.016	8.8064	0
30.0032	4.8384	0
43.7248	6.144	0
50.944	8.1664	0
28.8768	4.7104	0
90.1888	38.2208	0
40.0384	4.5312	0
46.8736	4.48	0
31.104	4.6848	0
48.2048	8.9344	0
57.5232	8.6784	0
27.5712	2.3552	0
39.808	7.6032	0
88.9088	28.032	0
72.6016	0.8192	0
42.4192	4.8896	0
29.0048	4.3776	0
65.2288	13.7472	0
66.9184	13.1072	0
32.0256	5.0688	0
38.0416	5.376	0
28.1344	3.5072	0
26.0864	2.048	0
31.5136	4.4032	0
72.4736	13.9264	0
46.2848	8.0128	0
130.79	3.6864	0
558.157	40.1408	0
37.632	6.0928	0
35.3536	6.4	0
84.8896	21.8624	0
173.133	5.888	0
47.5136	7.2192	0
36.0192	2.1248	0
73.8816	13.9776	0
44.672	7.0144	0
67.328	11.6736	0
173.133	23.296	0
33.5104	4.9664	0
45.1584	6.6304	0
134.886	23.424	0
79.4368	16.4864	0
188.186	51.3024	0
36.9408	3.5584	0
39.936	4.5568	0
173.133	5.8368	0
63.7952	13.056	0
123.366	1.7408	0
28.544	3.5328	0
47.0016	10.2656	0
134.502	49.2544	0
72.576	17.3824	0
34.304	3.3792	0
10.9056	0.3072	0
61.4144	9.2416	0
70.5024	12.6208	0
28.032	4.1216	0
558.157	2.3296	0
67.5328	12.4928	0
36.0704	7.5008	0
41.6768	4.3008	0
100.198	21.2992	0
123.366	3.9424	0
558.157	8.4736	0
558.157	17.3056	0
32.8192	5.8368	0
39.68	2.4576	0
31.7184	2.4064	0
44.416	5.8368	0
123.366	0.512	0
34.2016	6.144	0
558.157	0.8448	0
34.944	2.1504	0
98.4832	4.8384	0
32.4352	6.9888	0
37.4784	5.7856	0
41.728	3.4304	0
37.8624	1.28	1
98.4832	10.0096	0
39.1424	4.608	0
79.0784	14.1824	0
558.157	2.1504	0
65.4336	13.824	0
33.8176	3.584	0
1910.99	10.496	0
61.6192	10.88	0
446.208	0.1792	1
558.157	0.7936	0
38.0928	6.9632	0
1910.99	2.3296	0
1910.99	2.7648	0
78.4896	14.2848	0
30.4384	2.7904	0
39.4752	5.4016	0
98.4832	5.2736	0
558.157	3.328	0
38.5024	5.0432	0
184.627	22.7072	0
103.654	11.264	0
32.1024	4.992	0
593.562	57.5744	0
1910.99	5.8368	0
61.5168	13.184	0
446.208	4.3776	0
24.4736	1.9456	0
71.1936	18.2016	0
30.2848	4.3776	0
1910.99	1.0752	0
36.864	5.0688	0
103.654	6.7072	0
1910.99	0.4352	0
1910.99	0.1536	0
184.627	11.0848	0
43.9296	5.5296	0
1910.99	0.2048	0
1910.99	0.0768	0
100.915	11.264	0
24.8576	4.608	0
29.4656	3.456	0
36.736	5.1712	0
58.6752	10.112	0
1910.99	382.899	0
31.4368	2.9184	0
65.5616	11.9808	0
30.6944	4.224	0
184.627	4.9152	0
34.2528	5.0432	0
1910.99	0.1536	0
33.28	6.3232	0
38.2208	7.0144	0
70.8096	14.4384	0
1910.99	1.8944	0
1910.99	0.7936	0
100.915	2.4576	0
28.16	3.1488	0
64.0512	12.416	0
38.4256	2.4832	0
66.7648	12.032	0
44.1344	4.1216	0
25.216	0.5632	1
37.8112	5.5296	0
39.5008	5.9904	0
36.0704	3.1488	0
322.509	3.7632	0
322.509	2.9184	0
41.9328	5.1712	0
36.1728	3.5328	0
35.84	4.3264	0
32.7424	4.7872	0
41.4208	3.9424	0
1910.99	1.0752	0
24.8576	3.456	0
45.0048	5.4272	0
41.9072	6.4768	0
21.1712	3.328	0
42.7264	9.1904	0
24.064	0.8192	1
34.2016	5.7088	0
322.509	4.352	0
105.037	17.4592	0
322.509	32.6656	0
48.9216	8.3968	0
35.3792	6.9632	0
446.208	1.2288	1
36.0704	6.4	0
35.4048	2.8672	0
73.472	15.4368	0
37.2992	3.0208	0
171.955	5.6576	0
47.9232	5.8624	0
16.256	0.256	0
84.3776	1.2288	0
322.509	18.0224	0
37.2992	3.1488	0
593.562	8.1664	0
28.9792	2.432	0
34.688	6.0416	0
105.037	0.768	0
171.955	23.168	0
37.0688	2.2016	0
511.949	1.536	0
84.3776	5.3248	0
1910.99	1.0752	0
59.4432	12.2368	0
511.949	0.896	0
29.3888	6.5792	0
1910.99	0.5632	0
1910.99	1.8432	0
39.2448	5.6832	0
39.936	5.6832	0
34.0224	5.1712	0
49.6128	12.288	0
146.534	32.8448	0
49.7152	7.424	0
58.8288	6.7584	0
39.3472	6.016	0
46.9504	7.3984	0
77.696	20.8128	0
34.3808	6.8608	0
76.6464	5.1456	0
40.3456	2.176	0
32.5632	3.3792	0
49.28	6.5024	0
54.4768	8.7552	0
76.7488	14.9248	0
253.901	83.4816	0
37.9904	3.2768	0
32.4608	6.5792	0
171.955	5.4016	0
511.949	108.493	0
29.5424	7.0912	0
176.41	7.2448	0
87.8592	19.072	0
593.562	43.7248	0
34.048	5.5296	0
51.2512	7.9872	0
593.562	3.712	0
593.562	8.9088	0
1910.99	1.2288	0
110.771	15.4112	0
32.3584	1.0752	0
39.5776	6.6304	0
110.771	5.4528	0
44.5952	5.4528	0
68.7104	19.0976	0
176.41	8.96	0
34.9696	2.2016	0
51.9424	5.2736	0
1910.99	1.4848	0
73.9328	16.4096	0
176.41	9.3184	0
1910.99	0.0768	0
42.24	8.6272	0
70.1952	8.704	0
39.0656	5.1456	0
151.398	0.0512	0
176.41	18.9952	0
1910.99	1.3568	0
49.9968	5.9648	0
35.0208	6.1952	0
41.4208	9.7792	0
151.398	12.1088	0
27.1872	3.84	0
151.398	5.504	0
593.562	15.8976	0
28.3904	4.6848	0
36.0448	4.6592	0
51.712	10.112	0
39.552	6.144	0
67.1488	13.0304	0
41.0624	4.7872	0
39.5008	5.9136	0
29.0048	3.8144	0
125.184	14.6432	0
78.0544	13.1328	0
68.2752	12.9024	0
109.901	6.9632	0
354.79	4.3264	0
76.3136	20.48	0
44.6208	9.0368	0
147.123	29.2352	0
48.64	8.0128	0
35.2	5.248	0
354.79	1.2032	0
28.9536	5.5808	0
26.24	5.1456	0
37.3248	3.1232	0
33.7408	3.2512	0
85.8368	9.9328	0
109.901	11.5712	0
109.901	1.3056	0
125.184	10.9056	0
44.544	5.1456	0
36.352	2.8416	0
81.7152	9.3952	0
354.79	10.9824	0
47.8464	8.4736	0
128.717	8.6784	0
128.717	18.2784	0
114.074	17.5872	0
147.123	0.8192	0
830.438	4.736	0
41.6512	5.2992	0
354.79	12.928	0
830.438	129.818	0
31.7696	6.0416	0
42.6752	6.912	0
46.6432	6.7584	0
51.5328	6.7584	0
34.8928	4.9408	0
29.3632	6.1184	0
37.9136	6.6816	0
87.168	18.7648	0
190.643	4.1472	0
190.643	9.856	0
36.4288	3.456	0
38.6048	6.7328	0
48.768	7.5776	0
111.744	27.9808	0
494.822	6.2208	0
36.4544	8.192	0
54.3232	10.7008	0
30.3104	3.5072	0
40.0128	3.9936	0
85.8368	2.9696	0
27.392	4.1728	0
41.728	6.0928	0
34.7904	4.0448	0
114.074	2.304	0
75.5968	16.6912	0
35.3536	3.712	0
354.79	4.7104	0
354.79	4.352	0
494.822	103.526	0
44.9536	7.5264	0
43.0336	6.5024	0
40.2944	6.6048	0
190.643	3.2512	0
161.306	6.6304	0
167.885	55.6032	0
494.822	0.7936	0
44.672	7.7568	0
29.4912	5.8368	0
76.2368	17.152	0
33.8176	5.1968	0
75.5968	3.1744	0
117.914	30.9248	0
60.5696	11.9296	0
32.1536	6.2464	0
54.0928	6.656	0
45.5936	7.296	0
980.198	128.666	0
190.643	5.248	0
32.2048	5.9136	0
51.4816	9.216	0
830.438	6.528	0
47.6416	6.528	0
35.1488	3.328	0
33.8944	2.816	0
37.632	3.7632	0
50.432	8.3712	0
40.8576	9.7536	0
58.7264	2.2528	0
161.306	16.9472	0
38.912	6.784	0
51.9424	6.8096	0
162.79	50.3296	0
50.176	6.3744	0
37.8368	6.2976	0
58.7264	2.5088	0
65.8944	14.9248	0
110.874	8.8832	0
48.3072	8.4736	0
34.0224	5.12	0
121.472	6.3232	0
31.3856	3.84	0
63.488	2.688	0
63.488	7.0144	0
494.822	2.7392	0
43.2896	5.8112	0
830.438	1.6896	0
830.438	1.0752	0
110.874	12.9536	0
43.8528	6.2464	0
39.04	7.5264	0
63.616	9.8304	0
57.1136	8.8832	0
37.2224	5.5808	0
63.8976	11.9552	0
37.7344	6.9888	0
44.0576	3.2	0
980.198	2.816	0
32.3328	6.7584	0
55.7312	8.1664	0
830.438	5.9904	0
37.0432	6.144	0
46.848	4.3264	0
25.6768	5.9648	0
121.472	19.7376	0
192.973	50.688	0
36.608	5.4272	0
375.782	129.254	0
69.7344	12.4672	0
35.1744	6.4768	0
39.0144	3.4816	0
36.0192	6.656	0
33.28	7.1168	0
97.664	4.8384	0
980.198	21.7088	0
38.016	9.3184	0
79.6672	12.8256	0
[truncated: 31,511 more rows]

## Sheet: Fig 3G raw p putida
droplet_area	aggregate_area	live_ratio
70.8352	6.3232	0
51.2	5.1456	0
28.5952	0.9728	0
132.506	0.2304	0
228.531	19.5072	0
110.848	0.6912	0
110.848	0.0512	0
119.936	3.6608	0
62.1824	2.5344	0
195.763	3.712	0
145.254	16.0768	0
30.72	0.8192	0
96.6656	10.0352	0
110.848	5.0176	0
195.763	3.328	0
66.0224	2.7648	0
110.95	4.3264	0
119.936	8.2944	0
62.1824	5.2736	0
79.488	4.4288	0
228.531	6.272	0
132.506	11.392	0
105.242	5.4784	0
110.95	1.8176	0
123.648	13.1584	0
49.5104	4.6592	0
1604.99	0.6656	0
1604.99	16.9216	0.0472973
1604.99	170.65	0.151978
195.763	1.2032	0
78.7968	6.5024	0
144.717	9.7536	0
511.309	0.6912	0
96.128	8.32	0
195.763	5.6576	0
63.4112	1.8944	0
1604.99	1.1008	0
5.76	0.1536	0
1604.99	0.5376	1
146.048	6.0416	0
138.138	8.8576	0
1604.99	0.8448	0
1122.36	83.1488	0.000785238
511.309	39.296	0
53.9904	1.8688	0
76.8	6.5536	0
1122.36	0.4096	0
511.309	7.3984	0
144.717	8.2944	0
1122.36	0.9472	0
73.3952	6.4512	0
171.597	17.2288	0
136.883	8.8064	0
417.126	21.1968	0.0595611
172.288	0.5376	0
66.8672	5.3248	0
299.955	29.6704	0
104.96	2.432	0
164.326	1.2288	0
112.102	6.6048	0
261.171	10.1888	0
172.288	10.8032	0
120.525	8.6528	0
1122.36	12.7744	0
1604.99	1.152	1
417.126	6.1952	0
1604.99	0.8448	1
4.4544	0.2048	0
164.326	1.6128	0
164.326	2.6624	0
50.8672	2.8416	0
91.6736	7.5776	0
1122.36	2.176	0
65.7152	3.3024	0
1122.36	2.944	0
1604.99	0.8192	0
99.7376	7.5264	0
261.171	6.528	0
82.0224	8.5248	0
1604.99	0.1024	0
1604.99	0.256	0
59.3664	4.4288	0
1604.99	0.2048	0
1604.99	2.048	0.571429
511.309	3.5072	0
84.9408	7.2704	0
1122.36	0.7168	0
299.955	10.3168	0
66.0992	3.0464	0
71.4752	6.4768	0
320.41	4.736	0
1122.36	2.56	0
90.9568	5.0944	0
385.51	31.232	0
41.5488	1.664	0
417.126	12.672	0
163.994	17.3312	0
111.949	11.1104	0
320.41	12.0064	0.008
146.304	16.6144	0
1122.36	7.8336	0
205.85	4.3008	0
1604.99	21.248	0
100.07	7.3984	0
320.87	2.4832	0
477.824	62.8224	0
61.3888	3.968	0
97.6128	1.9712	0
97.6128	1.8944	0
116.608	11.52	0.035
135.168	5.888	0
205.85	13.2864	0
249.882	19.5072	0.0619621
320.87	2.3552	0
182.989	14.848	0
385.51	2.7904	0
130.867	17.2288	0
117.171	9.6	0
95.1808	8.4992	0
153.037	12.5696	0
320.87	26.5472	0
94.9504	7.7312	0
320.41	6.016	0
477.824	2.176	0
103.142	4.2496	0
320.87	0.2816	0
104.294	7.8848	0
247.808	0.6656	0
182.989	1.6896	0
135.168	3.2768	0
320.87	2.688	0
120.499	9.4208	0
385.51	4.5056	0
86.784	6.2464	0
247.808	11.4176	0
247.808	0.3584	0
117.683	9.6512	0
92.8768	7.1424	0
58.0352	5.7344	0
249.882	0.768	0
81.3568	3.0976	0
57.8304	2.4832	0
183.45	1.5872	0
35.1488	3.2	0
249.882	2.0224	0
74.9312	5.12	0
477.824	2.3808	0
57.8816	1.9968	0
75.0592	6.5536	0
46.0032	2.6368	0
94.8992	2.5088	0
477.824	1.5872	0
190.413	6.1696	0.120482
183.45	9.5488	0
77.9008	7.1424	0
70.528	5.4016	0
183.45	3.9168	0
211.226	8.32	0.107143
213.35	4.3776	0
96.5888	8.2688	0
211.226	1.4336	0
477.824	3.3792	0
69.376	4.1984	0
115.917	4.608	0
211.226	5.9136	0
169.549	11.1104	0
190.413	8.9088	0
64.2816	4.7616	0
107.827	11.5712	0
213.35	3.968	0
166.118	19.2256	0
71.6544	3.6608	0
114.048	8.2432	0
213.35	13.9776	0
178.842	12.16	0
94.2592	2.3296	0
169.549	3.584	0.4
81.7664	7.0144	0
173.133	5.0944	0
70.6048	2.0992	0
327.168	18.8928	0
89.5232	7.7056	0
85.376	5.76	0.156398
173.133	8.4224	0
76.9024	5.6832	0
178.842	4.7872	0
327.168	12.1088	0.0414634
28.16	2.4064	0
107.827	5.2736	0
109.594	7.6544	0
97.7664	4.3264	0
173.798	21.2224	0
72.4224	3.3536	0
96.256	6.8352	0
183.424	4.864	0
121.549	9.984	0
117.734	9.6256	0
81.5616	5.7856	0
81.8688	7.68	0
107.802	7.5008	0
418.842	36.0704	0
573.824	17.8432	0.019544
136.038	2.6368	0
136.038	4.7616	0.0759494
138.086	15.8976	0
64.384	5.12	0
151.731	2.176	0
83.7376	3.0976	0
68.7104	3.968	0
59.648	5.6064	0
46.0288	1.7664	0
19.456	3.072	0
47.8208	6.0416	0
229.376	3.8656	0
573.824	3.0208	0
51.5584	2.688	0
81.8432	4.5056	0
150.758	14.1056	0
151.731	12.672	0
1395.15	100.659	0.0205556
370.074	3.2512	0
262.912	29.056	0.0331754
138.445	10.6496	0
370.074	48.384	0
92.1344	6.6048	0
86.4768	4.9664	0
87.5776	6.6304	0
270.95	9.9328	0
81.4848	9.216	0
573.824	13.312	0
26.8288	3.0464	0
229.376	3.84	0
418.842	10.4704	0
84.4032	5.4016	0
1395.15	0.5888	0
59.9808	4.4032	0
229.376	10.1376	0.0600601
135.27	4.2752	0.3
262.912	2.2784	0
262.912	3.2256	0
1395.15	0.3072	0
270.95	8.3968	0
115.686	7.936	0
51.8144	2.7136	0
137.984	8.192	0
194.483	8.2176	0
284.979	26.0864	0
284.979	8.192	0
573.824	11.6992	0
84.096	6.3488	0
1395.15	2.2528	0
135.27	7.3984	0
113.946	6.2464	0.0225225
96.4096	8.704	0
155.136	18.4832	0
91.8784	7.4496	0
67.2512	5.1712	0
7.1168	2.4064	0
145.254	15.7952	0.0202361
270.95	5.3248	0
78.336	5.0944	0
94.336	7.7056	0
194.483	1.4848	0
370.074	4.0448	0
194.483	4.1472	0
573.824	1.8944	0
95.8464	8.3968	0
40.9344	1.792	0
137.984	3.2256	0
573.824	3.4816	0
127.258	8.1664	0
90.7776	7.7312	0
66.3808	4.5312	0
63.9744	3.0464	0
163.405	15.3856	0
45.1072	1.5104	0
125.926	10.7008	0
371.558	59.1104	0.0255682
40.448	6.4256	0
105.242	8.3712	0
112	5.9648	0
124.083	13.7728	0
85.248	9.1904	0
50.5088	3.3792	0
126.771	9.1136	0
136.448	16.4608	0
159.59	17.2288	0.0616667
81.6128	6.9376	0
37.6832	0.3328	0
81.1776	6.4512	0
40.0128	1.8432	0
79.0528	2.9696	0
126.771	3.4304	0
112.794	8.1408	0
163.84	21.8624	0
75.52	5.504	0
75.1872	5.0944	0
97.2544	4.0704	0
202.291	24.3712	0
42.5472	1.8176	0
1395.15	2.1248	0
149.862	12.1088	0
259.379	13.0816	0
92.544	7.168	0
124.083	14.6432	0
67.2768	5.1712	0
62.976	2.56	0
231.91	35.2256	0.112195
136.602	13.312	0
92.416	3.328	0
193.997	24.6016	0.0327654
1395.15	1.2288	0
75.1616	6.784	0
39.8848	1.2288	0
118.195	3.6096	0
301.286	3.584	0
38.016	2.176	0.118421
62.6176	3.6608	0
124.467	10.9824	0
118.477	7.7824	0
136.038	10.3936	0
76.544	4.2496	0
74.8288	4.352	0
299.648	4.5824	0
301.286	15.1808	0.0205011
172.646	8.3968	0
222.592	6.4512	0.142202
259.379	20.3264	0
299.648	13.056	0
103.168	8.9088	0
172.646	13.3888	0
19.3792	0.64	0
154.342	20.224	0
73.6768	4.864	0
81.3312	6.2208	0
67.1488	4.0704	0
52.3008	2.56	0
66.3296	4.1984	0
83.9936	6.912	0
4089.55	0.1024	0
94.592	6.8352	0
124.262	8.32	0.110345
89.5232	7.424	0
299.648	9.7792	0
4089.55	5.5296	0
2387.94	13.5424	0
222.592	7.8336	0
184.704	28.0832	0
155.366	8.32	0
258.995	6.9888	0
10.7264	3.712	0
191.846	5.7088	0
84.352	3.2512	0
224.384	27.8784	0
4089.55	1.7408	0
66.1504	3.5584	0.113043
2387.94	170.829	0.208779
4089.55	1.0496	0
2387.94	14.6944	0.206186
11.264	2.048	0
90.9056	9.6512	0
165.171	7.2704	0
155.366	5.4528	0
84.9664	5.3504	0
4089.55	6.784	0
136.09	12.8	0
112.563	10.0352	0.0310734
2387.94	10.3424	0
258.995	9.1392	0
97.6384	7.7824	0
348.083	38.8352	0
80.0512	4.2752	0
84.9152	4.5312	0
83.2512	4.0192	0
191.846	4.0704	0.228571
228.122	5.1712	0
258.995	5.9392	0
2387.94	1.1776	0.918919
165.171	5.248	0
118.554	6.4512	0
2387.94	0.768	0
102.784	9.3184	0
86.9376	5.4784	0
118.554	3.8144	0
4089.55	2.7904	0
228.122	4.0704	0
80.3328	5.76	0
2387.94	0.1536	0
41.6256	1.5616	0
97.6128	6.9376	0
85.5296	7.808	0
2387.94	13.312	0.332569
82.8928	4.6848	0
76.0064	4.4544	0
228.122	5.9392	0
226.458	14.464	0
1113.65	34.6368	0.016488
226.458	15.9232	0
170.163	19.1488	0.0514469
1113.65	32.3072	0
95.6672	6.1184	0
89.1392	8.1408	0
81.7408	8.4736	0
106.88	9.0112	0
187.085	4.9408	0
348.083	8.9856	0
253.645	5.504	0.216867
141.389	6.144	0
2387.94	0.5632	0
146.918	4.3264	0
90.112	5.76	0
137.523	10.368	0
124.698	9.9584	0
81.8688	5.9904	0
94.2336	6.144	0.142241
141.389	5.4016	0
187.085	16.6144	0
4089.55	1.1264	0
253.645	9.0112	0.0660066
146.918	7.4752	0
89.2672	6.3232	0
2387.94	0.8192	0
818.637	5.8368	0.0252525
65.5872	5.1456	0
253.645	6.2976	0
67.4048	3.5072	0
2387.94	7.4496	0
1113.65	0.2048	0
1113.65	5.8112	0.0224719
295.552	33.4592	0.163914
149.606	24.6272	0
82.6624	7.936	0
189.21	2.56	0
74.9824	6.1184	0
818.637	2.8672	0.213115
98.0992	9.6512	0
818.637	4.1728	0
89.856	5.376	0
428.8	1.3312	0
52.0704	1.8432	0
189.21	2.944	0
428.8	0.6912	0
428.8	42.7264	0
131.533	5.9904	0
223.462	16.384	0
4089.55	0.128	0
1113.65	0.4096	0
1113.65	1.152	0
271.334	3.5072	0
223.462	3.5328	0
154.342	19.1488	0
254.106	23.8848	0.00119474
176.563	4.6592	0
428.8	1.1776	0
1113.65	0.9216	0
1113.65	0.8704	0
1113.65	0.1792	0
125.491	3.0976	0
720.947	4.4288	0
720.947	4.2496	0
109.466	8.9344	0.308772
105.267	7.296	0
131.533	1.6896	0
113.715	8.448	0
66.7648	4.3008	0
23.3984	5.9648	0
40.7808	1.408	0
4089.55	0.64	0
26.8544	1.6384	0
720.947	3.2	0
1.1776	0.4352	0
1113.65	8.2688	0
295.552	3.1232	0
69.76	4.2752	0
182.118	24.7296	0
428.8	2.5344	0
1113.65	0.64	0
78.4384	6.9888	0
80.6912	4.8384	0
406.298	11.5968	0
1.9456	0.7424	0
146.688	7.0912	0.543933
1113.65	1.7664	0.103448
406.298	2.2784	0
1113.65	3.0208	0
271.334	18.6112	0.0518053
164.634	24.4992	0
71.2192	3.7888	0.147826
818.637	2.3296	1
4089.55	4.5056	0
720.947	28.288	0
1113.65	0.8192	0
125.491	2.9696	0
720.947	0.7936	0
6.912	0.512	0
115.328	10.5216	0
111.923	8.7552	0
188.698	4.7616	0
2.048	0.4608	0
188.698	2.2272	0
46.3616	4.8128	0
111.334	10.8544	0
6.912	0.64	0
406.298	2.9184	0
1113.65	1.4592	0
188.698	5.8624	0.178082
47.0016	2.7392	0
720.947	3.1232	0.981308
111.462	8.3968	0
4089.55	15.1296	0
318.387	54.4	0.00867245
1113.65	5.9648	0.174129
1113.65	0.4864	0
94.7968	6.5792	0
1113.65	2.2272	0
163.994	19.6352	0.0628019
406.298	3.8144	0
60.1344	2.1504	0
92.9792	7.808	0
89.7792	7.2448	0
91.4432	5.4272	0.102941
87.1168	7.296	0
45.9264	1.9712	0
406.298	9.6256	0
112.512	8.576	0
59.1872	6.0928	0
318.387	2.6624	0
4089.55	4.3264	0
61.2608	4.8384	0
86.8864	1.5616	0
62.336	4.1216	0
69.376	5.0176	0
1196.54	5.12	0
4089.55	14.2592	0.0578778
60.288	2.7392	0
86.8864	3.5584	0
113.152	6.3744	0.247706
123.085	1.6128	0
255.744	37.2736	0
65.8432	6.7584	0
1196.54	161.357	0.226683
36.736	1.8688	0
720.947	1.5616	0
258.611	42.496	0.0195024
720.947	9.6	0
4089.55	23.0144	0.052161
96.512	6.016	0
69.0176	6.2976	0
720.947	6.0672	0
4089.55	0.3584	0
4089.55	0.2816	0
138.01	5.888	0
109.645	7.1936	0
123.571	10.0608	0
1196.54	0.8448	0
77.0048	0.3328	0
121.242	7.6032	0
94.7712	6.016	0
274.253	51.9424	0
54.2464	2.7904	0
1196.54	0.2304	0
7.7824	1.3568	0
720.947	8.0896	0
121.242	2.048	0
86.4768	6.1696	0
143.898	3.6608	0
60.8768	4.224	0
151.782	4.7104	0
58.24	5.6832	0
1196.54	10.6752	0
262.195	4.2496	0
69.12	2.432	0
138.01	3.3024	0
151.834	4.5824	0
1196.54	13.4656	0
231.27	15.36	0.0982143
36.6592	4.8896	0
93.9008	7.2192	0
105.728	2.5856	0
500.198	1.3568	0
191.744	3.328	0
48.5632	6.912	0
262.195	4.8896	0
30.7968	4.3776	0
151.782	10.5728	0
262.195	13.9008	0
128.435	7.4752	0
50.2528	4.3008	0
143.898	1.408	0
115.328	5.2992	0
500.198	0.1536	0
151.834	5.376	0
67.3536	5.4528	0
143.898	2.0736	0.315789
73.8304	5.1712	0
85.7344	4.5312	0
1196.54	11.2896	0
191.744	8.1152	0
95.488	5.4784	0
500.198	2.8672	0
57.728	3.6608	0
93.44	8.6016	0
45.2608	1.3568	0
84.0448	6.6816	0
91.3664	5.9136	0
128.435	2.3552	0
58.2912	4.4544	0
85.6576	5.8112	0
500.198	8.32	0
191.744	1.2288	1
164.557	2.0224	0
123.392	11.8016	0
184.474	5.7344	0
99.0976	5.5296	0
106.24	6.8608	0
109.03	8.1408	0
75.1872	5.0688	0
46.9248	2.9696	0
218.88	4.8128	0
164.557	5.4528	0
1196.54	4.2496	0
7.2448	1.3568	0
75.52	3.7376	0
70.2464	1.4336	0
101.786	8.3968	0
189.133	24.32	0.0261661
188.006	18.5088	0
184.474	2.2528	0
184.474	7.5264	0
218.88	25.7536	0
76.3648	6.2464	0.103604
117.786	12.928	0
233.677	17.3312	0.0366412
251.776	3.7376	0
500.198	0.6912	0
101.76	8.1152	0
42.4704	2.5088	0
97.8944	8.448	0
125.082	13.184	0
68.224	1.9456	0
231.245	20.7104	0
466.304	6.528	0
107.264	9.4976	0
251.776	1.2288	0.146341
115.328	7.3728	0
95.36	4.9664	0
181.094	12.288	0
251.776	2.9952	0.558559
500.198	8.96	0
71.296	5.3248	0
111.898	7.9872	0.109541
184.397	8.7808	0
466.304	14.1056	0
64.2304	1.1776	0
284.57	27.2384	0
74.496	4.352	0
284.57	4.7872	0
64.2304	2.2784	0
102.477	7.1168	0
102.605	9.0624	0
80.5888	4.6592	0
148.352	17.0496	0
154.445	17.792	0
95.5392	3.6608	0.620155
78.3104	7.2448	0
109.235	10.3168	0
284.57	2.1504	0
231.245	3.5584	0
95.5136	5.1712	0
102.477	2.1504	0
58.4704	3.9424	0
99.7888	6.784	0.181347
116.07	10.88	0
93.2352	3.8656	0
466.304	39.1424	0
184.397	9.5232	0
41.2416	2.1248	1
1881.52	7.3728	0.00884956
121.958	5.6576	0
90.24	4.608	0
95.5136	3.0208	0
1881.52	9.7792	0.0258621
93.0048	9.984	0
114.534	14.464	0
74.24	8.704	0
118.246	10.5984	0.146341
199.706	8.0896	0
124.851	9.4464	0
8861.11	62.8736	0.376045
131.994	2.7904	0
76.3392	3.9936	0
1085.06	70.0928	0.240943
144.23	3.5584	0
190.08	14.592	0
144.23	2.56	0
148.608	12.2624	0.0960452
199.706	8.832	0
91.7504	2.1504	0
92.6464	6.8352	0
8861.11	131.43	0.622004
444.416	1.9456	0
1881.52	0.3584	0
75.6736	4.1728	0
91.7504	2.8672	0
1881.52	3.968	0
131.994	8.064	0
444.416	32.1536	0.0445931
58.8544	2.2016	0
49.8176	2.432	0
110.003	7.1936	0.12782
190.08	7.7312	0
128.947	5.6832	0
74.4704	6.2464	0
46.208	1.0752	1
98.816	5.5296	0
444.416	6.9376	0
1881.52	0.6912	0
1881.52	0.8448	0
120.602	11.0848	0
413.85	6.8352	0
53.2992	3.4816	0
8861.11	0.128	0
8861.11	0.5888	0
8861.11	0.64	0
8861.11	2.048	0.75
149.862	8.4224	0
149.862	4.7616	0
128.947	7.5264	0
67.5072	4.5824	0
8861.11	5.0176	0.807692
40.3968	4.9152	0
83.5072	4.6592	0.355263
81.5616	4.608	0
79.3344	7.1424	0
102.451	1.5872	0
1881.52	0.3584	0
69.1712	6.2208	0
413.85	2.0992	0.333333
99.456	7.1936	0
128.384	5.9904	0
79.1296	5.9648	0
8861.11	4.352	0.278146
102.451	4.4288	0
77.1584	6.3744	0
97.7664	8.6272	0
1085.06	1.8432	0
187.955	17.6896	0.0464
8.3968	1.5616	0
8861.11	0.384	0
187.955	3.5072	0
8861.11	3.2512	0.657407
8861.11	1.2288	1
413.85	1.2032	0
93.4912	6.4	0.261905
1881.52	144.666	0.204603
201.216	8.8576	0
83.6608	5.4272	0
413.85	2.9184	0
8861.11	0.4096	0
8861.11	1.408	0.75
413.85	3.456	0
444.416	8.9088	0
1085.06	9.7792	0
8861.11	3.456	0.386555
413.85	0.4352	0
84.1472	6.6816	0
15.5136	6.1696	0
100.352	4.9408	0.0165746
8861.11	15.0784	0.421053
8861.11	1.7152	0
8861.11	2.2016	0
413.85	1.3312	0
1412.3	1.9712	0
70.2464	4.608	0
8861.11	0.9728	0
8861.11	2.0992	0.578947
413.85	10.0608	0.290141
159.872	12.0832	0
286.899	6.0672	0
8861.11	2.2016	0.691176
201.216	2.2016	0
102.093	8.6528	0
8861.11	8.1152	0.494318
35.6608	1.5104	0
1412.3	165.965	0.0344685
182.784	10.6752	0
8861.11	1.5104	0.666667
82.3808	3.1488	0
79.3856	4.5312	0
8861.11	1.1008	0
8861.11	4.0192	0.948148
8861.11	4.4544	0.702899
1412.3	0.4864	0
85.9904	6.016	0.145455
9.8304	3.5584	0
269.67	53.3504	0
8861.11	0.8704	0
286.899	5.632	0
1881.52	5.2736	0.0670732
53.7856	6.2464	0
286.899	9.3696	0.221453
201.216	4.736	0
8861.11	13.3632	0.279835
182.784	7.0656	0
8861.11	4.1472	0
147.635	2.4064	0.230769
1412.3	1.5104	0
43.1104	4.3264	0
155.315	9.7024	0
1412.3	1.3568	0
106.47	11.3152	0
8861.11	0.64	0
1881.52	0.1792	0
155.315	4.2496	0
8861.11	3.3024	0.413793
8861.11	0.8704	1
79.872	6.0416	0
166.528	20.6848	0.0554675
115.149	8.2688	0
147.635	4.7104	0
1881.52	0.64	0
1881.52	0.256	1
49.2032	5.2224	0
8861.11	1.0752	0.586207
135.91	7.1168	0
2856.86	7.1168	0.0368098
252.723	4.5824	0
252.723	11.776	0.0962441
110.515	9.7792	0
8861.11	11.8784	0.834025
1881.52	1.92	0
8861.11	56.6272	0.573473
8861.11	131.866	0.537308
1881.52	0.5888	0
1085.06	9.7536	0
1881.52	0.5888	0
66.4064	6.0928	0
8861.11	1.152	1
349.722	7.5008	0
1412.3	0.7936	0
58.2656	4.2496	0
71.2448	4.5824	0
76.0576	4.9408	0.183007
1412.3	12.7488	0
142.208	16.4608	0.0742972
2856.86	0.4352	0
2856.86	12.672	0.140969
1412.3	0.4608	0
8861.11	3.2	0.45977
2856.86	0.1536	0
1412.3	0.5376	0
602.138	1.5872	0
1085.06	7.2192	0
1881.52	4.3264	0
95.8208	8.6528	0
72.2944	5.4784	0
602.138	2.7904	0
149.094	7.3472	0
55.424	1.3312	0
2856.86	10.752	0
8861.11	0.1792	0
602.138	5.1968	0
1881.52	6.3232	0
131.814	10.2656	0
8861.11	0.0768	0
1412.3	3.6864	0
2856.86	2.2272	0
1881.52	0.768	0
8861.11	0.9472	1
602.138	1.664	0
8861.11	1.3568	0
1412.3	1.6896	0
144.64	15.9488	0
710.81	1.0752	0
131.814	1.3056	0
52.0192	1.792	0
8861.11	2.304	1
710.81	37.8624	0.152062
2856.86	0.3328	0.285714
39.7568	0.2816	0
8861.11	0.1792	1
1412.3	0.8448	0
1412.3	0.1536	0
111.949	8.9088	0
15.0528	1.536	0
602.138	0.3584	0
1412.3	0.0512	0
51.7888	3.072	0
1412.3	1.3568	0
8861.11	0.1536	0
149.094	6.0416	0
8861.11	1.5872	1
602.138	0.256	0
710.81	8.5248	0
602.138	5.7856	0
66.4832	2.56	0
64.9472	3.968	0
252.979	3.0208	0
47.9744	3.4048	0
56.6784	2.5088	0
602.138	78.8992	0.0329331
349.722	11.5456	0
58.6496	6.0416	0
252.979	22.4768	0.00312989
2856.86	5.8624	0
1412.3	2.6368	0
71.3984	3.7632	0
2856.86	0.1792	0
8861.11	0.2048	0
252.979	5.6064	0.101695
134.784	5.6064	0
107.443	7.3472	0
8861.11	0.0768	1
60.8	2.9184	0
8861.11	0.0768	1
8861.11	0.0768	0
8861.11	3.8912	1
104.013	9.6768	0
8861.11	6.1184	1
2856.86	26.3936	0.0227273
8861.11	1.0496	0
320.666	0.9216	1
88.6528	5.4528	0
81.1776	2.0736	0
134.784	1.4592	0
252.979	24.0384	0.00681431
710.81	6.0928	0
71.9616	5.0176	0
54.5792	2.6624	0
8861.11	0.4096	1
320.666	0.6144	1
163.251	3.456	0
65.9712	3.5584	0
73.4208	5.1968	0
53.9136	5.0176	0
320.666	12.2112	0
8861.11	2.0736	0
74.9312	6.1184	0
82.56	3.968	0
314.547	8.8832	0
84.6336	4.9152	0
8861.11	0.128	1
58.496	2.2784	0
101.274	6.8352	0
8861.11	1.5872	0
232.602	2.3808	0
100.992	8.5248	0
85.9648	6.016	0
320.666	25.728	0
65.7152	3.3792	0
2856.86	333.773	0.11084
107.315	4.6848	0
286.643	17.9456	0.0664452
8861.11	35.584	0.529595
8861.11	2.5344	1
163.251	7.68	0
314.547	4.8384	0
286.643	7.7824	0
232.602	5.6832	0
230.784	22.1952	0
2856.86	1.7664	0
232.602	6.5792	0
128.282	14.1056	0
2856.86	0.4352	0
175.283	7.296	0
79.2832	3.4816	0
81.7408	3.9936	0
122.624	9.856	0
183.885	3.8144	0
8861.11	5.504	0.765027
153.114	10.624	0.117647
64.256	1.5872	0
314.547	1.6896	0.372881
8861.11	0.2304	0
290.381	25.6512	0
2856.86	3.1744	0
2856.86	1.5104	0.583333
155.725	9.1648	0
69.248	2.7392	0.5
175.283	4.9152	0
207.053	23.552	0
108.749	7.0656	0
232.602	1.8944	0
232.934	2.7392	0.534884
62.72	3.7376	0
8861.11	0.3328	0
47.4368	2.1248	0
109.824	7.9872	0
8861.11	0.0768	0
183.885	14.6688	0
232.934	6.2464	0.210884
314.547	0.1024	0
8861.11	9.856	0.558974
2856.86	0.512	0
89.5232	6.7584	0
2871.78	1.2288	0.333333
314.547	2.9184	0
2871.78	1.9968	0.0930233
2871.78	16.9216	0
2856.86	12.032	0.032967
8861.11	129.946	0.60948
85.2992	5.7088	0
8861.11	9.0624	0.141762
2871.78	0.3584	1
36.0704	2.2528	0
2856.86	0.4608	0
126.336	7.7312	0.0899281
314.547	1.536	0
82.56	3.9424	0.246479
2871.78	3.2	0.604396
111.206	5.6576	0
232.934	5.4528	0
64.1024	4.1216	0
2871.78	158.848	0.178255
2871.78	0.9728	0
49.7152	2.3808	0
408.627	9.1648	0.211712
8861.11	0.3584	0
8861.11	2.6112	0
291.43	7.8592	0
314.547	5.2736	0
188.032	3.8144	0.0756303
2856.86	8.2944	0.226131
141.542	2.176	0
8861.11	0.9984	1
408.627	6.4512	0
78.208	9.1392	0
67.5072	5.4272	0.146919
45.0048	1.8944	0
8861.11	0.4096	0
141.542	7.3728	0
8861.11	0.7168	0
8861.11	5.632	0.240741
2871.78	3.2768	0.353659
122.65	7.5776	0.157258
75.6992	5.5808	0
8861.11	1.1264	1
291.43	19.4304	0
8861.11	52.736	0.546961
8861.11	1.92	0.684211
45.1584	1.408	1
2856.86	3.6608	0.495146
95.36	4.608	0.356589
214.477	22.3744	0
408.627	17.8688	0.0448598
2856.86	0.512	0
71.7056	3.584	0
291.43	2.8672	0
2871.78	0.3584	0
102.63	5.888	0
2856.86	13.1584	0.05
11.5712	2.9184	0
8861.11	0.2816	0
2871.78	1.6896	0.561404
228.326	13.5936	0
186.061	25.8816	0
188.032	1.8944	0
55.552	1.664	0
8861.11	1.1264	1
188.032	0.0768	1
2871.78	6.3232	0
109.926	5.8624	0.0338164
95.616	6.2464	0
47.36	1.3824	0
65.28	3.4816	0
359.68	2.0224	0.357143
8861.11	0.128	1
106.931	5.3248	0
75.5712	4.736	0
8861.11	1.2032	1
228.326	3.456	0
87.7056	5.4528	0
2871.78	0.6656	1
139.776	1.5872	0
172.442	8.9344	0
2871.78	4.1984	0.715517
2871.78	1.408	0
60.7488	6.5536	0
107.52	6.8864	0
8861.11	83.328	0.568519
54.016	2.4064	0
359.68	0.1792	0
142.541	8.6016	0
2871.78	1.4592	0
228.326	9.088	0
159.693	8.3712	0
57.1392	5.1712	0
46.6176	1.4848	0
137.498	3.2	0
69.9648	1.1776	1
8861.11	0.1024	0
359.68	15.9232	0
2871.78	0.3072	0
8861.11	0.8448	0
139.776	6.0672	0
76.4416	3.6096	0
137.498	8.2688	0
159.693	0.0768	1
75.904	5.632	0
159.693	1.6384	0
63.744	3.712	0
59.9296	1.6896	0
8861.11	4.6848	0.744361
66.4064	3.2	0
114.227	4.8384	0
99.2512	4.1984	0.192857
86.6048	1.8688	0
69.0688	1.4592	0
2871.78	0.1024	1
118.784	8.7808	0.184314
8861.11	16.256	0.795389
172.442	6.0928	0
72.8576	5.5296	0
118.784	1.1264	0
114.227	1.6896	0
50.0736	3.3792	0
37.8368	3.1232	0
57.1136	3.0464	0
8861.11	1.4592	0
67.2768	3.8144	0
114.432	9.0112	0
259.456	17.8176	0.0224913
51.9424	3.968	0
122.317	12.1088	0
85.5552	1.4592	0
8861.11	0.9984	0
8861.11	0.2304	0
70.144	0.6656	0
76.3392	1.92	0
65.792	2.56	0
85.5552	0.7424	1
259.456	5.888	0
187.75	10.2144	0
8861.11	1.1008	0
65.8944	2.6624	0
8861.11	3.0976	0.989247
117.99	5.2224	0
84.9152	5.4784	0
359.68	7.68	0.139344
12.2624	2.2272	0
90.24	6.5024	0
8861.11	0.384	0
8861.11	0.4352	1
79.3856	3.2256	0
98.4576	8.2688	0
148.173	15.3088	0.0960187
101.811	8.2944	0.143369
187.75	5.7856	0
62.8736	3.584	0
2871.78	8.32	0.13617
8861.11	2.7904	0
109.056	9.7792	0
99.7888	7.296	0
2.9952	0.1536	0
208.614	29.0048	0
70.784	3.2512	0
85.0432	7.9104	0
83.4048	3.7376	0
101.786	5.5552	0
77.568	4.0448	0
2871.78	2.1248	0
34.3808	4.096	0
98.6624	6.7584	0
248.32	1.9456	0
104.371	5.888	0
234.675	13.3632	0
234.675	12.032	0
248.32	1.8944	0
248.32	2.0224	0
2871.78	0.256	0
67.9424	5.5552	0
54.5024	5.6832	0
2871.78	1.3056	0
2871.78	0.1536	0
71.0144	4.5568	0
44.1088	1.7664	0
155.827	3.1744	0
248.32	11.4944	0
2871.78	1.5616	0
166.451	2.9696	0.174312
123.392	7.68	0
2871.78	0.9216	0
155.827	7.168	0.0827338
2871.78	5.888	0.00740741
379.008	15.36	0.121622
70.4	5.3248	0
96.2816	7.3728	0
120.806	4.2496	0
362.035	8.8576	0.080292
124.134	4.6336	0
44.5696	1.7664	0
76.5184	2.816	0
171.597	5.0688	0
34.56	1.408	0
80.64	4.1984	0
98.2272	7.2192	0
120.806	4.3008	0.138365
69.2992	4.3008	0
171.597	4.5056	0
179.712	7.8336	0.180077
12.9024	3.8144	0
118.835	8.8576	0
83.456	4.6848	0
166.118	20.1728	0
379.008	1.536	0
13.9008	1.5872	0
75.7248	4.3008	0
198.477	27.1872	0.045122
362.035	28.16	0.0832232
96.256	7.2192	0
279.04	25.344	0.0011655
651.443	1.152	0
179.712	3.7888	0
124.134	2.7904	0
129.741	10.1632	0.108197
146.278	8.704	0
117.939	5.9648	0
165.786	7.552	0
110.746	6.8864	0.152838
166.451	2.7392	0
102.323	5.7344	0
18.8672	1.6896	0
146.278	2.0224	0
98.688	6.2976	0
71.3984	4.8384	0
68.7616	4.9152	0
82.6112	5.888	0
86.784	3.9936	0
132.915	3.9424	0
79.616	7.5776	0
651.443	1.2032	0
63.488	4.48	0
651.443	1.1776	0
165.786	5.2224	0
160.179	19.8912	0
196.378	21.0944	0.0366972
77.824	3.6864	0
66.944	4.4288	0
132.915	4.352	0
64.256	5.9904	0
497.92	6.7072	0.213389
651.443	35.1232	0.0675926
174.336	14.1824	0
26.7008	0.256	0
651.443	1.5872	0
102.067	2.2784	0
226.842	9.472	0.108359
41.4464	1.9456	0
73.3952	5.7088	0
93.6704	10.4192	0
651.443	8.4992	0.121771
497.92	5.5296	0
60.6464	2.304	0
90.4192	6.6304	0
200.858	15.872	0.0438596
77.0304	7.1424	0
111.437	7.7824	0
96.3584	7.6032	0
497.92	5.2736	0
102.579	6.9376	0
103.066	7.552	0.0458015
226.842	10.9824	0
651.443	4.7104	0
98.6112	5.0688	0
131.635	12.8256	0.0168421
497.92	11.2128	0.25788
85.504	5.0432	0.185792
85.2992	2.7136	0
86.8608	2.7392	0
54.5024	0.8704	1
77.0304	4.9664	0
200.858	3.968	0
52.7104	3.0976	0
40.8576	3.3792	0
46.5408	0.6144	0
46.5408	0.9728	0
69.5552	5.1456	0
651.443	10.9824	0.111663
497.92	5.1456	0
129.664	4.1216	0
318.08	8.064	0
153.933	5.7344	0
116.864	10.88	0
52.8128	2.2016	0
142.413	8.0896	0.137255
130.048	11.5968	0
106.291	4.4288	0
127.795	15.7696	0
108.928	3.6352	0
318.08	16.5376	0.0212072
130.099	13.2352	0.0701754
81.3568	6.4768	0
90.4448	5.2736	0
107.622	6.656	0
153.933	11.904	0.0963303
10.4704	3.0464	0
38.4768	1.8688	0
842.496	6.3488	0.27897
185.958	20.7104	0.230357
129.664	2.5344	0
72.0384	5.2992	0
39.936	2.304	0.268293
11.52	4.8384	0
130.227	8.6272	0
93.568	5.2224	0
132.531	2.304	0
70.1696	2.6368	0
64.9216	2.7648	0
842.496	1.8432	0
3041.33	13.7216	0
220.851	1.8176	0
842.496	2.4832	0
842.496	1.792	0
100.787	9.1136	0
132.173	5.4272	0
842.496	1.5616	0
135.194	12.6464	0.115578
842.496	1.536	0
842.496	3.8912	0.277311
129.766	9.1904	0
132.531	7.04	0
144.435	13.44	0.0380313
56.7296	2.0736	0
318.08	7.424	0
220.851	1.536	0
113.28	11.776	0
318.08	2.8928	0
82.9952	6.1952	0
93.8496	5.6576	0
132.173	3.2256	0
138.982	8.2432	0.208481
842.496	0.4352	0
72.9856	4.5568	0
91.8272	4.0448	0
184.55	13.2096	0.0684932
222.515	19.0976	0
76.4416	3.7632	0
172.083	5.4784	0.101449
842.496	9.728	0
123.443	8.832	0
176.256	5.888	0
174.976	3.968	0
110.362	9.5744	0
66.4576	7.808	0
3041.33	2.3552	0
176.256	2.1248	0
66.4576	2.6368	0
127.923	10.7008	0
3041.33	14.6944	0.265748
71.7056	3.8144	0
176.256	1.8688	0
220.851	13.5424	0
74.9056	5.4528	0
3041.33	1.664	0
83.2256	6.5792	0
119.04	9.1136	0
172.083	1.92	0
184.55	2.2272	0
155.085	6.3488	0
46.592	3.5328	0
198.656	4.8896	0
198.656	8.9088	0
3041.33	0.4608	0
174.976	3.2512	0
57.6768	2.944	0
222.515	8.1664	0.109966
174.976	5.4528	0
3041.33	0.2048	0
80.2816	2.5344	0
64.7424	5.7088	0
158.438	5.4272	0
57.4208	2.432	0
63.7184	4.5824	0
842.496	1.9968	0
91.5712	11.648	0
83.8144	7.0144	0.196
97.2288	5.5808	0
842.496	2.048	0
3041.33	5.3248	0
142.874	10.5216	0
3041.33	163.021	0.254811
842.496	7.5776	0.242188
82.1248	4.7616	0
155.085	2.5344	0
54.1952	6.144	0.442478
158.438	7.0144	0
99.5584	4.0704	0.222222
326.118	44.672	0.00382263
86.912	6.5536	0
41.6256	1.7408	0
104.064	10.2144	0
97.2288	2.432	0.482143
91.136	5.6832	0
52.0192	2.2272	0
66.8416	5.7344	0
95.8464	9.0368	0
196.454	7.2704	0
153.242	18.7648	0
265.472	36.992	0
3041.33	1.8432	0
3041.33	0.1792	0
3041.33	2.8672	0.752577
3041.33	2.7392	0
255.002	6.4256	0
255.002	4.9152	0
111.821	8.704	0
171.827	14.7456	0.0381356
68.3008	5.248	0
196.454	9.6512	0
165.171	16.0256	0
127.386	3.7632	0
3041.33	1.792	0
199.014	8.1664	0
255.002	7.9872	0.176692
140.902	3.2768	0
3041.33	0.6656	1
8.8064	3.8656	0
95.8208	10.752	0
3041.33	1.2288	0
372.608	6.7328	0
466.253	11.8272	0.0155556
3041.33	0.9472	0
136.013	6.2208	0
254.157	3.6352	0
127.386	3.4816	0
81.8432	5.8624	0
372.608	4.096	0.28
136.013	0.5632	1
199.014	7.6544	0
63.2576	4.6592	0
82.8672	4.224	0
254.157	4.9664	0.169935
99.84	7.4496	0
132.429	7.936	0
346.445	5.0176	0
254.157	10.496	0.103659
99.8656	5.3248	0
54.1696	7.168	0
121.933	7.7824	0.122222
254.157	1.0496	0
139.213	15.9744	0
466.253	41.2416	0.0400943
101.069	9.344	0
73.9072	2.944	0
82.56	5.6576	0
259.072	20.4032	0.0160584
84.7872	5.376	0
372.608	7.8592	0.060241
115.2	5.6832	0.126214
412.339	3.1488	0
121.907	12.288	0
559.667	6.3232	0
346.445	29.184	0.0691334
185.472	5.2736	0
259.072	2.048	0
559.667	5.7344	0.211538
60.2368	5.248	0
67.7888	4.2496	0
372.608	5.6064	0.112745
128.256	8.3712	0
412.339	0.8704	1
259.072	0.9728	0
3041.33	1.1008	0
3041.33	4.8896	0
56.1152	3.0464	0
75.2128	7.4752	0
412.339	13.5424	0.0310881
76.5696	5.3248	0
85.248	4.9152	0.134831
185.472	8.3712	0
259.072	4.0192	0
3041.33	2.7392	0
3041.33	0.8704	0
279.117	12.4928	0
150.707	10.2656	0
150.707	1.9968	0
148.147	11.8016	0.194737
346.445	1.408	0
143.002	15.5904	0.107075
126.413	6.1184	0
126.413	1.792	0
38.528	1.5872	0
483.277	23.2448	0
100.045	9.1392	0
3041.33	11.776	0.175258
412.339	2.9696	0
559.667	2.8416	0
107.827	13.0816	0
97.92	5.248	0.135135
466.253	5.5552	0
112.102	8.448	0
107.597	8.4992	0
483.277	14.4128	0.156909
3041.33	1.8944	0.441176
78.6432	4.1216	0
12.0576	1.6896	0
279.117	9.2928	0.068323
559.667	3.9936	0
3041.33	5.0688	0
67.2	4.5568	0
412.339	22.0416	0.0146699
279.117	4.8128	0
483.277	7.2192	0
82.2016	4.1984	0
3041.33	8.32	0
56.8576	4.864	0
138.214	12.7744	0
127.872	9.472	0
400.666	5.0688	0
483.277	0.768	0
559.667	24.832	0.133867
132.275	14.1568	0
63.232	4.9152	0
69.7856	4.8896	0
94.0288	6.0672	0
400.666	4.5568	0
148.813	5.9136	0
122.854	7.552	0
41.6512	2.1504	0
483.277	2.6368	0
91.136	10.4192	0
65.5616	5.6576	0
194.33	2.304	0
194.33	2.0992	0
70.272	4.4544	0
33.0752	2.816	0
483.277	7.5008	0
148.813	6.3744	0
78.1312	6.2208	0
194.33	5.504	0
59.0336	2.2528	0
194.33	10.496	0
349.184	2.4064	0.340909
193.741	6.272	0
98.9952	8.2944	0
101.478	5.2992	0
400.666	1.8688	0
81.4336	4.9408	0
124.442	7.8848	0
207.309	4.1216	0
193.741	8.8064	0
349.184	3.9168	0
102.272	2.3808	0
207.309	2.6112	0
400.666	8.8832	0
46.6688	1.6896	0
89.344	4.1728	0
349.184	8.8576	0.266026
95.9744	9.7024	0
109.491	9.344	0
706.637	73.5232	0.0581669
207.309	9.6256	0
80.4608	4.6336	0
335.77	5.5808	0
102.272	2.6112	0
400.666	3.84	0
197.606	9.984	0
197.606	3.0464	0
68.9152	2.688	0
66.0736	10.0608	0
54.6816	3.2	0
59.4944	4.6592	0
88.1152	7.3984	0
64.512	5.6064	0
96.7168	5.8624	0.408602
168.781	7.168	0
73.3952	4.4544	0
64.6656	4.1216	0
706.637	1.6896	0
110.259	9.4464	0
112.768	9.5488	0
168.781	3.1232	0
763.136	5.2224	0.1625
85.504	4.352	0
64.5376	3.6608	0
121.779	13.0304	0
168.781	1.2544	0
32.64	2.3808	0
76.1856	4.7616	0
706.637	0.9728	0
706.637	0.7936	0
433.664	5.1456	0
126.234	11.4688	0
763.136	2.56	0.378049
395.853	1.7152	0
706.637	0.1792	0
395.853	64.6912	0.0227996
137.779	13.3632	0
706.637	0.5376	0
335.77	6.2976	0
143.002	12.0832	0.183417
395.853	1.408	0
706.637	20.8896	0.0612745
763.136	29.9776	0.142439
60.8768	2.6624	0
763.136	4.8384	0
335.77	17.8432	0.0390879
97.92	5.6064	0
79.5392	4.6336	0
327.552	21.7344	0.0438247
706.637	0.8704	0
706.637	0.9216	0
433.664	6.5024	0
433.664	41.2928	0.0457571
763.136	5.4272	0.179348
12613	6.5792	0
12613	1.4336	0.552632
84.5568	4.7872	0
75.776	3.2512	0
126.925	2.688	0
327.552	22.912	0
134.195	6.7584	0
162.586	6.4512	0
706.637	5.5296	0
126.848	10.9824	0
963.405	56.9088	0.134209
51.6608	2.6624	0
126.925	2.2272	0
47.36	1.2544	0
126.925	6.9888	0
12613	495.744	0.638669
12613	22.8096	0.430642
276.07	17.2032	0
149.811	6.7072	0.194093
86.2976	7.168	0
92.1088	6.8352	0
433.664	8.832	0
149.811	4.5568	0
95.4368	10.5984	0
133.402	8.4736	0.217054
170.701	6.784	0
12613	37.0944	0.304024
95.7184	3.6352	0
763.136	12.8512	0
137.421	9.1136	0
82.4832	3.8144	0
763.136	18.688	0.0646688
126.925	6.528	0
162.586	8.576	0
145.28	5.6064	0.132948
167.142	3.7888	0
74.624	4.7104	0
763.136	0.128	1
61.8496	6.272	0
84.5056	6.2976	0
12613	6.7584	0.443548
167.142	6.9632	0
95.7184	3.8144	0
963.405	0.4864	0
133.402	3.0976	0
78.08	1.664	0.490909
74.8288	4.5568	0
101.632	7.552	0
156.262	12.7744	0
12613	6.6816	0.492537
62.6944	6.656	0
113.587	8.4224	0
137.421	5.6064	0
276.07	5.3248	0
145.28	0.0768	1
963.405	7.3728	0
963.405	1.3824	0
122.24	3.6864	0
12613	0.8704	1
299.827	19.8912	0
12613	108.518	0.37533
12613	0.8448	1
763.136	14.1824	0
101.299	6.016	0
12613	0.5376	0
59.2384	2.6112	0.277228
145.28	2.688	0
170.701	5.248	0
122.24	4.6336	0
12613	6.4256	0.502825
107.29	5.8112	0
12613	0.256	0
12613	7.2448	0.0107527
121.498	3.1744	0
12613	1.0496	0
12613	0.128	0
12613	1.1008	0.46875
12613	0.0512	0
69.2736	4.4544	0
121.498	3.2256	0
12613	0.1024	0
72.7808	4.2752	0
12613	1.8176	0
963.405	6.3744	0
299.827	1.5616	0
49.024	5.6832	0
12613	4.8128	0.810219
299.827	7.4752	0
12613	0.4864	0
84.736	7.3728	0
92.1344	7.3472	0
963.405	0.6144	0
63.8464	2.8416	0
110.694	6.5024	0
12613	0.3328	1
86.9632	4.1216	0.142857
183.347	31.9744	0
110.08	3.6352	0
963.405	4.3008	0
97.5104	6.1696	0
12613	1.0496	1
12613	3.2512	0.5875
12613	0.1536	0
12613	0.64	0
12613	1.3568	1
12613	1.2288	0
130.509	2.6624	0
164.454	17.2032	0
167.014	7.9872	0
70.8608	1.664	0
110.08	1.4592	0
12613	0.256	0
299.827	5.4016	0
81.5616	6.6048	0
963.405	8.6272	0
12613	23.7056	0.604167
121.37	12.8768	0
151.501	6.0672	0
151.501	4.3264	0
12613	2.688	0
12613	0.7424	0
130.509	10.8288	0
12613	5.0432	0.521008
12613	0.896	1
71.5008	4.7104	0
12613	0.6912	1
142.694	20.992	0
57.4976	4.3264	0
12613	2.3552	0
963.405	1.7664	0
167.014	6.7328	0
12613	0.0768	0
107.827	11.392	0.0340314
161.69	19.0208	0
89.4208	5.12	0
158.694	10.6496	0.1
63.9744	5.376	0
89.856	7.2192	0
46.3872	2.7136	0
12613	9.5488	0.387097
12613	233.83	0.494398
12613	0.0768	1
158.694	7.5776	0
12613	0.6912	1
102.144	8.192	0
28.0064	4.096	0
153.626	17.1264	0
12613	1.024	0
12613	29.2096	0.355641
46.4384	1.3824	0
68.5824	5.888	0
12613	0.2816	1
84.1472	4.5824	0
87.6032	7.6288	0
12613	4.0448	0.973913
100.864	4.7104	0
12613	0.2304	0
12613	2.688	0
12613	0.3584	0
106.061	6.2976	0.173516
95.744	9.1648	0
12613	3.328	0.852941
42.88	1.5616	0
75.2384	5.7856	0
12613	0.0768	0
206.541	30.72	0
139.366	11.264	0.192513
208.026	8.6784	0
12613	3.1744	0.0365854
85.4528	5.4528	0
81.4848	4.5568	0
73.0368	4.5312	0
57.728	4.6848	0
12613	1.792	0.162162
95.5904	8.832	0
67.8912	4.352	0
208.026	11.1616	0
107.904	8.704	0
65.7408	6.9632	0
76.7232	5.2736	0
12613	1.9968	0
98.5856	8.2944	0
12613	2.4832	1
12613	0.0768	0
12613	0.9216	1
12613	0.0512	0
88.6016	7.3472	0
127.181	10.112	0.0409836
12613	1.7664	0.72
12613	5.376	0.236486
203.75	15.6416	0.0113122
12613	0.0768	0
31.8976	4.3008	0.413223
44.6464	1.7408	0
83.6608	8.5504	0
47.9488	1.3312	0
70.8352	5.6576	0
82.6624	4.992	0
12613	0.896	1
64.5376	4.8384	0
75.904	5.6576	0
406.246	10.2144	0.127451
203.75	3.2	0
76.0576	3.6608	0
3.7376	0.8704	0
79.5392	3.9936	0
12613	2.2272	0
197.12	11.648	0
88.4992	6.9376	0.174419
12613	1.1776	1
105.446	5.2992	0
321.331	4.3264	0
220.621	25.6	0
80.6144	1.5872	0
321.331	7.5008	0.149485
127.872	13.568	0
56.96	4.1216	0
406.246	7.8592	0
67.2512	6.0672	0
321.331	1.792	0
12613	0.384	0
9.216	1.024	0
103.706	6.6304	0
406.246	39.2704	0.0194915
12613	9.1904	0.743902
197.12	10.112	0.095082
446.285	20.864	0
107.136	7.7056	0
321.331	3.4048	0
12613	9.1648	1
446.285	2.8672	0.495327
51.712	2.4832	0
78.08	6.0672	0
161.946	5.9648	0
12613	4.4032	0.578947
67.1744	5.888	0
113.51	2.2528	0
107.674	8.448	0
88.0128	6.8608	0.163793
321.331	20.2496	0
247.142	5.2224	0
73.8304	3.2	0
79.104	7.0912	0
84.9152	8.96	0
65.8688	3.9424	0
76.928	4.1984	0
113.51	0.2304	0
69.632	4.352	0
446.285	3.4816	0
406.246	2.0992	0
341.299	6.2464	0
116.019	11.6224	0
12613	0.64	0
84.9664	5.8112	0
12613	2.9696	1
446.285	2.1248	0
109.85	7.9104	0
247.142	3.8656	0
118.426	6.6048	0.128906
12613	1.28	0.55
12613	0.9472	1
214.758	5.0176	0.0862069
81.4336	6.528	0.162393
341.299	13.0048	0
247.142	14.1056	0
446.285	5.6064	0.190476
178.202	8.6016	0.0766667
12613	4.2752	0.823077
12613	3.1744	0.867925
12613	15.5648	0.597015
161.946	3.6352	0
143.437	11.2896	0
96.6656	1.1008	0
71.2448	4.48	0
214.758	3.2	0
12613	2.2528	0.491228
118.195	8.832	0
183.04	6.144	0
446.285	6.9888	0
61.2352	2.8672	0
96.6656	4.3776	0.0833333
178.202	8.1664	0
71.0912	4.3008	0
93.9776	6.1184	0
62.6688	2.8416	0
183.04	7.3984	0
110.259	9.1904	0
13.184	3.1488	0
12613	0.8704	0
214.758	7.5008	0.104167
341.299	7.6288	0
88.6528	4.352	0
111.667	9.728	0
12613	243.584	0.88722
122.214	5.9648	0
12613	4.5056	0.157895
71.3984	6.3488	0
70.6816	2.944	0
102.554	10.5472	0
8.6016	2.7392	0
96.6144	5.2224	0
117.555	6.7328	0.114286
12613	13.7216	0.541806
112.307	10.0096	0
96.6144	1.9456	0
119.424	11.6992	0
100.403	5.7088	0
122.214	5.9392	0
122.24	2.176	0
123.776	5.5296	0
12613	8.32	0.185792
44.8256	2.6624	0
12613	2.048	1
123.776	3.6864	0
84.2752	3.9168	0
39.6032	5.7344	0
2.8928	1.408	0
70.528	3.1232	0
122.24	2.2784	0
12613	3.2256	0.478992
12613	29.5424	0.371938
61.6192	5.7856	0
12613	4.9152	0.137681
75.4432	5.248	0
12613	0.896	1
12613	0.1792	0
310.886	12.288	0
122.24	1.6128	0
928.973	48.4096	0.0136778
462.797	19.0976	0.00324675
85.0176	5.0688	0
928.973	1.28	0
12613	0.2304	1
12613	0.2048	0
129.587	8.0128	0
12613	0.9472	1
63.0784	3.3792	0
106.01	5.9392	0.160194
928.973	0.6912	1
81.8176	4.9408	0
12613	0.2816	0
130.739	4.1984	0
99.5584	1.2032	0
124.006	7.1936	0
459.827	2.944	0.359223
11.904	1.3824	0
12613	3.2256	0.321839
112.563	7.1936	0
459.827	1.536	0
82.9952	8.9344	0
94.6944	8.2944	0
130.739	1.6896	0
928.973	1.6896	0
310.886	15.1808	0
94.72	4.3776	0
188.109	13.3888	0
118.835	3.1488	0
84.224	4.5312	0
928.973	14.2848	0.114537
12613	1.536	0.5
12613	1.0496	0
459.827	15.616	0.368421
462.797	5.0944	0
86.2464	4.992	0
310.886	0.7168	0
2136.91	7.3728	0.140097
462.797	4.1728	0
310.886	0.9984	1
107.494	8.832	0
2136.91	2.56	0
76.4672	4.6336	0
2136.91	0.8704	0
80.1024	5.8368	0
56.704	2.4576	0
2136.91	25.344	0
462.797	8.3968	0
12613	27.8528	0.488839
224.307	6.9376	0
179.661	7.68	0.502415
2136.91	0.4608	0
241.28	30.0032	0.0635897
74.6496	4.6336	0
92.2624	7.9104	0
1.3056	0.9216	0
2136.91	27.0848	0.0604752
118.835	7.7312	0
96.512	1.7664	0
2136.91	2.0736	0
928.973	1.6896	0
164.454	8.8576	0
211.686	9.3184	0.172297
459.827	2.2784	0.1625
98.176	8.9344	0
928.973	0.64	0
[truncated: 27,061 more rows]
