# Supplementary material for: Bacterial survival in microscopic surface wetness
Source: eLife. 2019 Oct 15;8:e48508. doi: 10.7554/eLife.48508 (PMC6824842; doi:10.7554/eLife.48508)
Supplement: Figure 5—figure supplement 1—source data 1. — Figure 5—figure supplement 1A: Area fraction of cells (or beads) residing above a given droplet size. The droplet sizes are 100 evenly spaced (logarithmic scale) values between 101.5 μm2 and maximal droplet size (collective for all groups). Raw data: droplet area [μm2] vs cell area [μm2] and 'repeat' represents different field of views (each field of view is represented by a thin line in the plot), for P. fluorescens, P. putida, beads. Figure 5—figure supplement 1B: Aggregate area distribution of cells and beads. Bins are 45 evenly spaced (logarithmic scale) values between 10−0.5 μm2 and 104 μm2 (collective for all groups). Raw data: aggregate area [μm2] , grouped by field of view ('repeat') for P. fluorescens, P. putida, beads. [file elife-48508-fig5-figsupp1-data1.xlsx]

## Sheet: Figure 5 - Supplement 1A
p. fluorescens aggregated		p. putida aggregated		beads
droplet area [um^2]	fraction of population in larger droplets	droplet area [um^2]	fraction of population in larger droplets	droplet area [um^2]	fraction of population in larger droplets
31.6416	1	31.6416	1	31.6416	1
34.5768	0.968744	34.5766	0.998712	33.6842	0.98228
37.7843	0.934882	37.7838	0.997406	35.8587	0.955115
41.2894	0.900275	41.2885	0.9951	38.1736	0.926242
45.1196	0.867634	45.1183	0.991955	40.6379	0.893974
49.3051	0.838434	49.3034	0.987143	43.2612	0.868194
53.8789	0.80939	53.8766	0.979415	46.054	0.839142
58.8769	0.781142	58.874	0.970076	49.027	0.809647
64.3386	0.754533	64.335	0.956458	52.1919	0.779289
70.307	0.72822	70.3025	0.935588	55.5612	0.747597
76.829	0.703884	76.8236	0.909903	59.1479	0.71775
83.956	0.67943	83.9495	0.881143	62.9662	0.68869
91.7442	0.658607	91.7364	0.846287	67.031	0.662816
100.255	0.638425	100.246	0.80788	71.3582	0.635855
109.555	0.62109	109.544	0.771766	75.9647	0.609011
119.718	0.605387	119.705	0.735564	80.8686	0.580712
130.823	0.590964	130.809	0.70088	86.0891	0.554462
142.959	0.580444	142.942	0.664741	91.6466	0.526174
156.221	0.566772	156.201	0.63226	97.5629	0.502873
170.712	0.556366	170.69	0.598704	103.861	0.478667
186.549	0.546116	186.522	0.567496	110.566	0.456861
203.854	0.53699	203.823	0.537431	117.703	0.434158
222.764	0.52795	222.729	0.508275	125.302	0.412443
243.429	0.519058	243.389	0.481021	133.391	0.398054
266.01	0.511374	265.965	0.455098	142.002	0.377988
290.687	0.50367	290.635	0.429484	151.169	0.360737
317.652	0.497959	317.594	0.408502	160.927	0.34974
347.119	0.490573	347.053	0.38471	171.316	0.339688
379.32	0.480142	379.244	0.367077	182.375	0.331128
414.507	0.471539	414.422	0.352877	194.148	0.320918
452.959	0.46158	452.863	0.341834	206.682	0.314374
494.977	0.449954	494.869	0.328454	220.024	0.30685
540.894	0.439441	540.771	0.31734	234.228	0.296509
591.07	0.428519	590.932	0.307447	249.348	0.287688
645.9	0.415468	645.745	0.298772	265.445	0.280526
705.817	0.403851	705.642	0.289155	282.581	0.274536
771.292	0.392863	771.095	0.280816	300.823	0.266481
842.841	0.387186	842.62	0.274615	320.242	0.262716
921.027	0.377206	920.779	0.270934	340.916	0.253111
1006.47	0.363652	1006.19	0.263055	362.923	0.247933
1099.83	0.357044	1099.52	0.253607	386.352	0.240911
1201.86	0.344789	1201.51	0.245427	411.293	0.235169
1313.35	0.329561	1312.95	0.237168	437.844	0.232572
1435.18	0.314856	1434.74	0.228175	466.109	0.225725
1568.31	0.300659	1567.82	0.217282	496.199	0.219791
1713.8	0.280071	1713.25	0.205891	528.231	0.21272
1872.78	0.263914	1872.16	0.192948	562.331	0.204499
2046.5	0.248643	2045.82	0.180513	598.632	0.201004
2236.35	0.237062	2235.59	0.170415	637.277	0.187851
2443.8	0.22912	2442.95	0.160334	678.416	0.181243
2670.5	0.20782	2669.55	0.154403	722.211	0.175615
2918.23	0.194025	2917.17	0.148373	768.834	0.170534
3188.94	0.185302	3187.76	0.139157	818.466	0.164956
3484.76	0.176362	3483.45	0.136043	871.302	0.159662
3808.02	0.163121	3806.56	0.133614	927.549	0.155419
4161.27	0.155689	4159.65	0.127959	987.427	0.153311
4547.29	0.127802	4545.48	0.119424	1051.17	0.150119
4969.12	0.121933	4967.11	0.118383	1119.03	0.146227
5430.07	0.118526	5427.84	0.116737	1191.27	0.143172
5933.79	0.115216	5931.31	0.115123	1268.17	0.138308
6484.24	0.106905	6481.48	0.111457	1350.04	0.133905
7085.75	0.103938	7082.69	0.107896	1437.19	0.12887
7743.06	0.100544	7739.66	0.106213	1529.97	0.126401
8461.34	0.0964107	8457.56	0.102644	1628.73	0.121741
9246.25	0.0947856	9242.06	0.0980367	1733.88	0.11607
10104	0.0896033	10099.3	0.0965575	1845.81	0.100425
11041.3	0.0852819	11036.1	0.091824	1964.96	0.0976505
12065.5	0.0815838	12059.8	0.0824196	2091.81	0.0946589
13184.8	0.0708741	13178.4	0.0663187	2226.85	0.0938288
14407.9	0.0677731	14400.8	0.0646497	2370.6	0.0853971
15744.4	0.0627587	15736.6	0.0628259	2523.64	0.082853
17204.9	0.0621588	17196.3	0.0605222	2686.55	0.0789609
18800.9	0.0618104	18791.3	0.0346742	2859.98	0.0753526
20545	0.0614296	20534.4	0.0336191	3044.61	0.0738183
22450.8	0.0610136	22439.1	0.0320398	3241.15	0.0728805
24533.5	0.0605589	24520.4	0.0303141	3450.38	0.0597969
26809.3	0.0600621	26794.9	0.0297168	3673.12	0.0568408
29296.3	0.0595191	29280.3	0.0296167	3910.24	0.0454972
32014	0.0591702	31996.3	0.0295073	4162.67	0.0451045
34983.7	0.0589271	34964.1	0.0293877	4431.39	0.0441926
38229	0.0586614	38207.3	0.0292571	4717.46	0.042957
41775.3	0.0583711	41751.3	0.0291143	5021.99	0.0426167
45650.5	0.0580538	45624	0.0289583	5346.19	0.0423775
49885.3	0.0577071	49856	0.0287878	5691.31	0.0415669
54512.9	0.0573282	54480.5	0.0286015	6058.71	0.0395174
59569.8	0.0569142	59533.9	0.0283979	6449.83	0.0382248
65095.8	0.0564618	65056.1	0.0281754	6866.2	0.0340197
71134.4	0.0549274	71090.5	0.0279323	7309.45	0.0325018
77733.1	0.0531489	77684.6	0.0276667	7781.31	0.0251134
84944	0.0512055	84890.4	0.0273764	8283.63	0.02443
92823.8	0.0490818	92764.6	0.0270592	8818.38	0.0235367
101435	0.046761	101369	0.0267126	9387.65	0.0229584
110844	0.044225	110772	0.0263338	9993.67	0.0226625
121127	0.0414537	121047	0.0259198	10638.8	0.0223475
132363	0.0384254	132275	0.0251999	11325.6	0.0222046
144641	0.0351161	144544	0.0234717	12056.7	0.0220804
158059	0.0314998	157952	0.0215831	12835.1	0.0219482
172721	0.0275481	172603	0.0195194	13663.6	0.0218075
188744	0.0232298	188613	0.0172643	14545.7	0.0216577
206253	0	206108	NaN	15484.7	0.0214983
206255	0	206110	0	15486.7	0

## Sheet: Figure 5 - Supplement 1B
log10(aggregate area [um^2])	Fraction of the population
	p. fluorescens aggregated	p. putida aggregated	beads
0	0.00227419	0.00647533	0.000148491
0.316228	0.000704864	0.00339869	6.89023e-05
0.398107	0.00107055	0.00556783	0.000160704
0.501187	0.0017615	0.00844673	0.000221363
0.630957	0.0027196	0.013513	0.000356318
0.794328	0.00363403	0.0161418	0.000574729
1	0.00509216	0.0213509	0.000713551
1.25893	0.00709339	0.027301	0.000896239
1.58489	0.011222	0.0391374	0.00104117
1.99526	0.0191123	0.0489372	0.000975115
2.51189	0.0284542	0.0586202	0.000945499
3.16228	0.0443794	0.0726426	0.00130131
3.98107	0.0602728	0.0909366	0.00240242
5.01187	0.079258	0.105268	0.00369162
6.30957	0.0861434	0.102311	0.00652944
7.94328	0.0754907	0.0898694	0.0134127
10	0.0621009	0.0684561	0.0267819
12.5893	0.0529936	0.0462121	0.0612586
15.8489	0.043141	0.0278348	0.0694059
19.9526	0.0389801	0.0209896	0.134851
25.1189	0.0291014	0.0148667	0.129692
31.6228	0.0223263	0.0114375	0.128466
39.8107	0.0184801	0.00962351	0.114188
50.1187	0.0194114	0.00508132	0.0911559
63.0957	0.0216072	0.00777318	0.0621528
79.4328	0.0287155	0.00979985	0.033758
100	0.0387318	0.01391	0.0190523
125.893	0.0387265	0.0104156	0.0140003
158.489	0.0450594	0.00884969	0.00732237
199.526	0.0294314	0.0127388	0.00911098
251.189	0.0235636	0.00444779	0.00215673
316.228	0.0135376	0.00374785	0.0043953
398.107	0.00620738	0.00281294	0.00515974
501.187	0.0108936	0.00340396	0
630.957	0.00482839	0.00768157	0
794.328	0.00265538	0	0
1000	0.0102369	0	0
1258.93	0.00433103	0	0.0107741
1584.89	0.00625652	0	0.00725886
1995.26	0	0	0.00877258
2511.89	0	0	0.0103411
3162.28	0	0	0
3981.07	0	0	0.0165055
5011.87	0	0	0
6309.57	0	0	0
7943.28	0	0	0
10000	0	0	0

## Sheet: Fig 5 Supp 1A raw p fluorescens
droplet_area	cell_area	repeat
8.3968	0	1
2.7648	0	1
9.1648	0.0768	1
60.4416	13.312	1
25.3952	0.896	1
6.272	0	1
21.504	0	1
129.229	16.9984	1
23.1168	2.3808	1
23.8336	5.5552	1
7.3472	0.0256	1
47.7696	6.0672	1
18.0992	1.28	1
4.6592	0	1
17.92	3.2256	1
7.9616	0	1
617.293	53.1712	1
15.7696	1.28	1
595.84	116.301	1
33.2544	2.2272	1
30.208	7.8592	1
60.1344	8.0384	1
53.6576	9.984	1
6.144	0	1
15.7696	0	1
7.5776	0	1
69.0432	16.2304	1
33.8176	6.3232	1
521.907	35.328	1
3.5584	0	1
19.3536	0	1
64.256	16.384	1
64.3072	7.3984	1
95.2064	12.2624	1
7.9104	0	1
3.6864	0	1
27.7248	0	1
9.5232	0	1
13.5424	0	1
104.013	12.4928	1
6.912	0	1
28.2624	5.6064	1
39.0144	2.8928	1
34.0224	5.6832	1
6.9376	0	1
32.0256	1.792	1
21.4528	4.5824	1
33.7664	6.6816	1
39.7312	0	1
79.616	9.216	1
108.083	18.176	1
26.5216	0	1
5.1968	0	1
39.4496	2.048	1
22.528	0	1
14.592	0	1
32.8448	5.2736	1
31.2576	0	1
9.9072	0	1
25.088	0	1
27.4176	3.712	1
6.6304	0	1
3.4304	0	1
25.7792	4.2496	1
3.712	0	1
86.656	15.2576	1
53.9904	15.0272	1
27.4176	1.92	1
56.7296	2.9696	1
13.44	0	1
33.152	5.2224	1
33.9712	3.9168	1
5.632	0	1
15.1808	0	1
40.8064	4.992	1
4.7872	0	1
33.152	5.0176	1
8.2432	0	1
33.7152	7.296	1
103.398	13.9776	1
6.3232	0	1
24.704	0	1
41.2672	5.6064	1
91.7504	12.6208	1
3.5584	0	1
75.8784	13.4656	1
158.976	27.8784	1
51.968	3.0208	1
37.7856	2.56	1
45.4656	3.1232	1
50.176	8.576	1
45.5424	6.6304	1
50.56	7.9872	1
34.2528	4.864	1
38.1952	7.68	1
29.696	0	1
38.4512	5.9392	1
913.408	13.184	1
11.1104	0	1
6.8608	0	1
50.8672	0	1
9.728	0	1
35.3024	2.2784	1
65.3056	12.3648	1
11.52	0	1
44.6208	5.504	1
4.992	0	1
8.3456	0	1
31.8464	5.1712	1
57.2928	9.3952	1
32.4352	5.1456	1
2.9952	0	1
69.7088	13.7216	1
65.3056	5.3504	1
34.7648	3.7632	1
58.9568	9.1392	1
45.1328	6.4768	1
7.6032	0	1
31.1808	2.7392	1
31.7952	2.7904	1
32.64	2.6624	1
34.8672	2.5088	1
32.5888	6.6304	1
35.2512	0	1
38.4256	5.8112	1
7.8592	0	1
36.9408	3.2256	1
3.072	0	1
53.376	10.7776	1
27.4176	2.6624	1
5.4016	0	1
30.9504	4.6848	1
48.3072	7.7056	1
31.2576	6.272	1
31.6928	5.1968	1
77.9264	11.4688	1
4.224	0	1
4.7104	0	1
99.5584	26.7008	1
37.8624	7.9616	1
193.024	41.6768	1
28.8256	3.6352	1
43.7248	7.808	1
4.3008	0	1
49.0752	8.4224	1
59.4688	1.1776	1
81.4592	17.152	1
15.9488	0	1
30.4896	4.9408	1
41.7536	4.608	1
36.992	2.2016	1
28.9536	3.6864	1
1646.08	417.382	1
41.3184	2.7392	1
42.5472	7.424	1
77.7472	20.1984	1
323.507	86.7584	1
81.4336	1.8944	1
16.9472	0	1
29.2864	5.6832	1
37.4784	5.6832	1
35.5584	3.1232	1
51.9936	13.4912	1
38.5536	5.8368	1
46.8736	2.0224	1
8.8064	0	1
44.4416	9.4464	1
5.4784	0	1
34.176	2.2016	1
34.0224	5.9904	1
2.6624	0	1
31.7952	0	1
105.037	6.5024	1
54.9376	8.0128	1
39.1168	5.7088	1
54.3488	11.5456	1
12.1856	0	1
19.2512	0	1
38.272	3.3792	1
8.0384	0	1
64.6144	9.1904	1
32.0256	2.6368	1
161.536	36.1984	1
40.7808	8.7296	1
7.7056	0	1
1395.4	212.941	1
3.0208	0	1
39.3728	5.888	1
16.5632	0	1
75.9296	19.1488	1
37.888	5.7088	1
102.4	18.9952	1
13.7472	0	1
41.6256	6.6048	1
59.3664	13.9264	1
5.6576	0	1
104.525	1.2288	1
3.6352	0	1
40.9088	2.8416	1
43.264	5.8624	1
25.9584	0	1
70.1184	13.7216	1
36.0448	6.3488	1
37.7344	5.2736	1
71.2192	10.7008	1
70.2208	12.8512	1
55.5008	10.4448	1
23.5264	0	1
6.4768	0	1
4.3008	0	1
7.2448	0	1
6.144	0	1
5.4528	0	1
3.9424	0	1
47.488	9.4464	1
18.3552	0	1
74.8544	13.5424	1
98.3808	28.0832	1
7.4752	0	1
39.936	5.5552	1
36.352	7.5776	1
26.3168	9.3184	1
7.9872	0	1
49.6896	9.0112	1
23.5264	0	1
44.3904	6.4768	1
29.952	5.4016	1
3.6864	0	1
73.984	8.6528	1
2.7904	0	1
637.133	92.6464	1
35.9424	2.3552	1
1378.56	237.978	1
4.9408	0	1
45.824	11.0848	1
3.8912	0	1
12.1856	0	1
4.1984	0	1
36.8896	2.4064	1
6.7072	0	1
8.5504	0	1
6.4	0	1
35.9168	2.3296	1
5.5808	0	1
24.8832	0	1
97.536	0	1
38.2976	6.4512	1
28.9792	0	1
30.5664	5.6832	1
2.9696	0	1
29.0816	2.8672	1
31.4624	4.8128	1
7.936	0	1
5.2992	0	1
26.112	5.0432	1
12.9024	0	1
35.7376	6.6816	1
5.248	0	1
3.456	0	1
34.3808	5.9392	1
30.6688	5.5552	1
43.8016	5.7344	1
15.872	0	1
12.6976	0	1
33.6128	6.0928	1
32.0512	4.4544	1
11.2896	0	1
51.6608	0	1
4.6848	0	1
15.9488	0	1
21.3504	0	1
58.5984	8.448	1
45.1584	4.6592	1
48.8448	5.9136	1
5.5552	0	1
18.944	0	1
2.5856	0	1
30.5664	12.8256	1
40.2176	9.6768	1
35.8912	4.3264	1
6.9376	0	1
39.4496	2.6112	1
11.9296	0	1
47.3088	7.7568	1
41.2672	5.9136	1
1182.87	214.784	1
73.1648	16.128	1
7.2192	0	1
47.1552	7.7568	1
465.075	79.4112	1
145.459	31.8208	1
7.936	0	1
7.7056	0	1
19.9168	0	1
4.7104	0	1
8.2176	0	1
34.4832	6.9632	1
39.8592	0.7168	1
5.0688	0	1
34.56	3.0208	1
6.144	0	1
104.115	26.1376	1
34.3552	4.5824	1
43.52	6.7328	1
8.6528	0	1
31.744	5.76	1
4.0448	0	1
62.5664	6.0672	1
9.2672	0	1
38.2208	2.3552	1
46.9248	11.5968	1
18.176	0	1
78.8992	17.3568	1
47.4112	7.0912	1
3.2512	0	1
47.6672	4.7104	1
12.5184	0	1
20.3008	0	1
48	6.0928	1
8.2432	0	1
39.9872	3.9424	1
32.9216	6.1696	1
14.976	0	1
33.5616	5.9904	1
35.6608	1.4848	1
98.2528	24.8832	1
9.2928	0	1
70.6048	12.288	1
13.5168	0	1
31.104	2.9952	1
14.2592	0	1
5.888	0	1
2.7648	0	1
43.136	4.1216	1
8.96	0	1
4.7104	0	1
157.645	20.7616	1
33.9712	1.8688	1
15.8464	0	1
26.5472	2.8416	1
6.9376	0	1
21.12	3.3024	1
33.6384	5.6576	1
74.8288	17.2032	1
5.5552	0	1
6.912	0	1
4.3776	0	1
47.3088	6.0416	1
6.5536	0	1
20.7872	3.8912	1
7.8336	0	1
7.3216	0	1
14.2592	0	1
83.2	14.208	1
282.65	79.7696	1
360.243	145.152	1
28.16	4.3008	1
8.7552	0	1
40.6784	4.5824	1
10.88	0	1
32.2304	4.9408	1
4.224	0	1
32.9984	8.7296	1
9.0624	0	1
8.2944	0	1
69.1712	10.4704	1
16.5632	0	1
555.008	146.586	1
26.1376	3.5328	1
5.8112	0	1
43.776	3.6864	1
37.9904	2.9184	1
7.6288	0	1
53.2224	8.1408	1
3.8144	0	1
36.3264	4.3776	1
21.6576	2.56	1
7.5008	0	1
40.576	4.5312	1
11.52	0	1
7.68	0	1
35.1232	4.4032	1
30.1824	4.9664	1
13.2096	0	1
42.7776	3.3024	1
36.992	2.2272	1
32.3584	4.1984	1
89.9072	20.48	1
36.7616	5.5296	1
3.4048	0	1
6.784	0	1
2.7648	0	1
5.8112	0	1
10.5216	0	1
38.3488	5.5296	1
20.5568	0	1
18.304	0	1
9.1904	0	1
6.7072	0	1
6.8096	0	1
8.96	0	1
28.672	5.12	1
38.0672	8.6272	1
5.9904	0	1
35.6352	2.432	1
19.7376	0	1
34.3808	3.7632	1
2.7648	0	1
13.824	0	1
57.6	8.0896	1
40.6016	5.4528	1
52.1984	14.208	1
32.6144	5.1456	1
53.9136	10.6752	1
38.9632	8.448	1
25.344	7.1424	1
109.389	33.7408	1
38.8352	1.8688	1
47.36	3.3792	1
6.5024	0	1
3.9424	0	1
5.3248	0	1
2.7904	0	1
33.28	5.8112	1
2.8416	0	1
64.9984	8.3456	1
58.752	6.144	1
4.6848	0	1
2.7904	0	1
7.5264	0	1
8.448	0	1
41.2416	4.4288	1
76.3392	13.5168	1
44.6976	6.784	1
58.9824	11.3408	1
9.7536	0	1
36.1984	2.4576	1
42.9568	6.1696	1
56.7296	5.4528	1
33.0496	1.28	1
74.24	8.704	1
50.9184	2.7136	1
31.2576	5.5808	1
59.776	13.4144	1
109.107	22.9632	1
26.112	2.3808	1
7.1424	0	1
9.0624	0	1
53.2736	8.832	1
6.9632	0	1
28.8768	5.2224	1
111.565	22.9888	1
2.8672	0	1
30.1824	4.8896	1
9.1648	0	1
10.752	0	1
9.7536	0	1
12086.1	1756.26	1
9.8816	0	1
36.0704	3.072	1
8.0896	0	1
37.12	5.5552	1
35.7632	1.664	1
12.9024	0	1
52.736	7.1936	1
52.3776	11.0336	1
37.376	4.224	1
533.248	125.594	1
6.656	0	1
714.829	148.634	1
46.7456	7.3216	1
36.864	6.6048	1
87.9872	13.1584	1
76.9536	19.9168	1
59.9808	12.0576	1
31.9488	5.504	1
36.7104	5.0176	1
15.488	0	1
16.7936	0.9216	1
51.84	8.3968	1
28.2368	0	1
110.464	10.3936	1
147.738	35.84	1
6.9632	0	1
9.6256	0	1
39.7568	8.3712	1
3.7632	0	1
39.3984	8.6784	1
37.7344	4.1472	1
7.6288	0	1
70.6816	15.1296	1
114.56	24.1408	1
35.6608	6.3488	1
14.8224	0	1
62.5152	12.288	1
7.8336	0	1
40.5248	5.7344	1
8.4736	0	1
123.725	33.2288	1
8.3456	0	1
9.728	0	1
45.184	8.0384	1
13.2352	0	1
3.4304	0	1
6.6816	0	1
33.28	7.2192	1
33.5104	6.2208	1
3.584	0	1
8.32	0	1
27.264	0	1
126.566	11.4432	1
39.3472	6.5536	1
31.7696	4.1216	1
21.4016	0	1
4.7872	0	1
32.8704	4.3008	1
5.6064	0	1
3.4304	0	1
37.12	4.5312	1
35.328	4.5824	1
39.5264	7.424	1
31.0528	5.4016	1
58.2912	14.1824	1
53.376	11.7248	1
47.8976	7.9616	1
33.3568	5.9648	1
4.0704	0	1
8.6784	0	1
36.1472	2.9184	1
78.8992	11.0848	1
40.1152	6.9888	1
35.968	8.0896	1
31.0016	6.9632	1
27.1872	4.5312	1
10.496	0	1
5.248	0	1
85.2992	21.5296	1
105.293	17.0496	1
69.0432	9.8304	1
38.2464	8.064	1
33.8944	2.9184	1
33.152	3.3024	1
75.0592	20.3776	1
145.818	23.936	1
13.3376	0	1
2.7904	0	1
5.9392	0	1
70.5536	0	1
3.8912	0	1
13.9776	0	1
13.4144	0	1
4.48	0	1
10.9824	0	1
49.024	7.4752	1
4.7872	0	1
4.6336	0	1
34.0224	4.1472	1
277.222	48.3072	1
13.952	0	1
32.3584	5.12	1
52.8128	6.6304	1
30.9504	6.0416	1
15.2832	0	1
6.0416	0	1
40.2944	6.912	1
4.2496	0	1
3.2256	0	1
38.6048	7.9616	1
63.1808	12.3392	1
28.5696	4.6336	1
17.3568	3.9168	1
40.0896	12.2112	1
40.4224	5.2992	1
65.8944	9.7024	1
36.096	4.096	1
5.0432	0	1
4.5568	0	1
3.5584	0	1
34.9696	7.1424	1
8.448	0	1
33.0752	4.224	1
9.9584	0	1
133.811	27.6224	1
37.1712	6.2208	1
30.9248	0	1
13.1072	0	1
72.1152	14.5664	1
2.8672	0	1
220.518	9.1904	1
28.5696	7.424	1
119.578	29.7984	1
39.1424	5.7344	1
45.3632	8.832	1
5.8624	0	1
50.6624	6.912	1
118.144	20.7872	1
56.704	5.1712	1
28.0064	4.8896	1
3.8912	0	1
4.3776	0	1
12.2368	0	1
34.7136	2.944	1
9.8304	0	1
31.3344	4.9152	1
3.0976	0	1
31.1552	2.3296	1
13.2096	0	1
5.6576	0	1
9.8304	0.0256	1
66.6368	7.296	1
146.765	35.1744	1
33.8176	3.1232	1
3.1232	0	1
119.654	28.3392	1
322.406	63.2064	1
8.2688	0	1
2.7136	0	1
36.5824	2.7392	1
6.3232	0	1
58.1888	10.4448	1
40.4224	3.8656	1
76.6208	9.3696	1
15.4112	0	1
39.8848	3.2512	1
5.376	0	1
3.4816	0	1
28.288	1.6384	1
71.808	9.344	1
8.6528	0	1
5.2736	0	1
44.7488	4.096	1
33.664	3.6864	1
41.3184	8.2688	1
5.6832	0	1
38.272	7.552	1
23.7056	3.8656	1
72.448	17.28	1
6.784	0	1
78.0032	14.208	1
7.808	0	1
35.712	5.0432	1
8.192	0	1
62.4384	7.6032	1
14.5408	0	1
54.8864	10.624	1
3.7888	0	1
9.6256	0	1
5.3504	0	1
97.2288	15.2576	1
23.2448	0	1
30.3872	3.456	1
60.1088	6.4	1
67.6352	19.072	1
42.8032	2.8416	1
2.688	0	1
61.4656	22.8096	1
108.237	15.36	1
30.7456	4.4288	1
159.923	52.8128	1
637.056	139.11	1
105.395	24.8576	1
47.4112	3.3792	1
46.5408	6.272	1
31.9488	5.0432	1
3.3536	0	1
70.0672	5.0176	1
41.0624	7.9872	1
36.7616	7.808	1
35.8656	6.2208	1
34.6368	0	1
43.6992	6.1952	1
3.6096	0	1
40.1152	1.7152	1
34.6368	2.048	1
56.704	16.256	1
3.8144	0	1
42.0864	9.1648	1
58.24	11.008	1
53.7088	5.0176	1
9.088	0	1
14.08	0	1
14.8992	0	1
3.6352	0	1
3.6608	0	1
2.9696	0	1
34.176	2.2784	1
6.528	0	1
3.84	0	1
66.9952	20.8128	1
63.7184	9.2672	1
8.4736	0	1
4.5312	0	1
43.0592	9.1904	1
3.7888	0	1
50.5344	3.3792	1
11.3152	0	1
6.656	0	1
7.7056	0	1
2.6368	0	1
13.5168	0	1
35.9936	0	1
4.7616	0	1
11.0592	0	1
66.048	13.0304	1
93.2352	14.2848	1
6.6304	0	1
61.5936	10.5984	1
35.328	2.7648	1
8.576	0	1
53.9392	5.8368	1
12.7232	2.5856	1
66.3808	16.5376	1
3.7376	0	1
28.0576	5.9136	1
2.7136	0	1
11.136	0	1
35.712	2.2784	1
9.3696	0	1
49.2288	10.624	1
67.3024	8.1408	1
2475.85	114.662	1
53.1456	11.3408	1
77.9776	11.6224	1
491.802	134.298	1
34.8416	3.2512	1
32.1792	5.6832	1
84.4288	17.2288	1
77.1072	19.84	1
21.8368	7.5008	1
57.6768	6.0672	1
7.0144	0	1
3.0976	0	1
504.371	89.4208	1
41.088	6.1696	1
70.2208	7.3216	1
45.568	8.8576	1
38.9632	3.6096	1
38.1952	4.992	1
41.0368	3.84	1
160.563	14.2848	1
684.672	156.8	1
5.0432	0	1
100.045	15.5136	1
28.6976	0	1
4.6848	0	1
32.2048	2.048	1
1460.61	236.134	1
49.5616	8.4992	1
34.1504	4.4032	1
31.232	2.1248	1
5.8112	0	1
35.5584	6.5536	1
5.5808	0	1
32.9216	1.6896	1
2.7904	0	1
41.6512	9.6768	1
14.8224	0	1
4.6336	0	1
2.944	0	1
7.168	0	1
22.2976	0	1
30.3616	6.144	1
27.4688	0	1
41.8816	9.216	1
39.7312	5.2992	1
238.694	95.2832	1
39.168	4.2752	1
3.7376	0	1
58.3424	3.4304	1
32.1536	2.8672	1
6.4768	0	1
11.0592	0	1
59.2384	10.1888	1
34.5088	7.3728	1
71.552	5.5808	1
35.712	8.8064	1
53.8112	9.1392	1
6.0416	0	1
22.9376	0	1
30.3872	2.8672	1
29.2864	4.608	1
596.838	117.606	1
36.736	2.9952	1
30.5664	1.5104	1
38.8864	2.1504	1
33.1008	5.1968	1
7.1424	0	1
26.496	2.304	1
30.1056	6.1952	1
28.8512	3.5328	1
8.6528	0	1
46.08	7.6288	1
29.4144	6.2464	1
33.2544	3.2768	1
17.1264	0	1
6.4768	0	1
89.0112	21.0176	1
37.8368	5.5296	1
11.8016	0	1
65.6384	12.6208	1
122.675	3.7376	1
8.4736	0	1
65.3568	17.3568	1
37.4272	2.2016	1
8.4736	0	1
33.8944	7.936	1
8.2432	0	1
3.4304	0	1
5.1968	0	1
12.16	0	1
30.08	4.5568	1
4.7616	0	1
60.7232	17.9968	1
38.4	4.2752	1
3.6096	0	1
28.9792	3.8912	1
117.632	35.1232	1
6.4256	0	1
58.2656	15.872	1
47.232	9.0624	1
39.0912	8.448	1
8.8576	0	1
39.3728	5.6832	1
7.3472	0	1
35.5072	2.8416	1
55.424	8.1408	1
10.9056	0	1
10.1888	0	1
11.3152	0	1
46.1824	8.1408	1
39.0912	7.552	1
31.104	4.48	1
6.9632	0	1
31.2576	5.504	1
72.4736	16.4096	1
47.5392	3.328	1
22.8608	7.4496	1
13.2352	0	1
3.1488	0	1
56.0128	9.0368	1
3.5584	0	1
17.4592	0	1
30.464	6.272	1
43.9296	7.2448	1
19.2768	1.4592	1
7.6288	0	1
34.56	6.3488	1
9.9584	0	1
8.5504	0	1
30.208	4.9408	1
42.8032	8.576	1
35.7888	8.5504	1
52.8128	7.6288	1
3.84	0	1
11.9808	0	1
4.3008	0	1
3.6608	0	1
5.1712	0	1
16.1792	0	1
56.3712	9.3184	1
30.8992	2.944	1
29.0048	2.7392	1
9.5744	0	1
53.632	10.1376	1
33.7664	6.3232	1
10.2912	0	1
5.8112	0	1
6.0672	0	1
3.4304	0	1
18.9696	0	1
26.8544	0	1
40.9856	8.0896	1
4.1728	0	1
192.742	32.9472	1
37.4272	8.6784	1
3.5072	0	1
36.7616	2.4064	1
3.712	0	1
32.1536	5.4784	1
53.4784	7.7056	1
8.8576	0	1
14.336	0	1
139.213	33.3312	1
3.3536	0	1
40.5504	6.5536	1
9.9584	0	1
12.1856	0	1
4.096	0	1
235.29	49.9712	1
3.456	0	1
6.016	0	1
14.8736	0.2816	1
16.3584	4.096	1
33.3824	6.9888	1
9.6512	0	1
6.0928	0	1
8.7296	0	1
32.0256	4.1728	1
47.4624	0	1
15.5904	0	1
3.0464	0	1
21.1968	0	1
11.2384	0	1
33.5104	8.1664	1
41.728	7.3728	1
50.5088	9.9328	1
65.3568	12.3392	1
47.616	13.6704	1
33.8688	2.7136	1
37.8624	0.2304	1
34.1504	7.168	1
38.144	5.504	1
52.4288	7.8848	1
12.2112	0	1
9.472	0	1
20.8384	0	1
33.6384	6.3488	1
35.584	1.1008	1
58.6752	10.2144	1
3.2768	0	1
120.934	26.368	1
19.6096	0	1
7.552	0	1
12.9792	0	1
36.7872	8.2688	1
11.648	0	1
9.0368	0	1
40.3456	0	1
6.3488	0	1
137.728	32.2304	1
11.52	0	1
5.6064	0	1
38.8608	15.2576	1
6.0672	0	1
45.7984	3.5584	1
4.3776	0	1
23.3216	5.3248	1
55.936	10.1376	1
121.728	27.1104	1
99.584	16.4608	1
46.848	10.88	1
35.712	3.328	1
9.2416	0	1
13.0048	0	1
24.96	2.8928	1
11.6224	0	1
43.0336	5.8112	1
34.3552	3.456	1
106.931	0	1
19.0464	0	1
38.7328	6.3488	1
35.5328	4.5824	1
43.7248	5.6064	1
31.232	4.3264	1
57.2928	13.2864	1
2.7136	0	1
53.2224	12.416	1
23.1936	2.9696	1
87.5264	5.248	1
39.7056	8.4992	1
36.3776	5.2736	1
37.3504	8.0896	1
8.2944	0	1
9.7024	0	1
81.6384	14.336	1
36.992	2.0736	1
7.4496	0	1
3.328	0	1
67.968	14.0032	1
6.3232	0.0256	1
2.5856	0	1
7.6032	0	1
6.1696	0.0256	1
58.624	10.88	1
8.1408	0	1
6.784	0.0256	1
8.6272	0	1
13.6192	0	1
50.7136	6.4512	1
114.202	24.9088	1
60.1856	9.1904	1
67.7632	13.0048	1
56.064	7.7568	1
34.4064	6.6304	1
36.4544	4.224	1
3.2256	0	1
36.864	1.0752	1
5.7088	0	1
41.344	6.2464	1
32.2048	3.6352	1
45.4912	3.6352	1
5.0176	0	1
2.6368	0	1
21.9392	0	1
94.72	19.9168	1
38.0672	8.7552	1
54.4768	9.7792	1
27.8272	4.1728	1
30.7712	6.5792	1
27.2128	2.2016	1
11.264	0	1
47.5136	6.4256	1
61.0048	11.0848	1
40.2944	6.3488	1
44.9792	6.8864	1
33.792	7.7568	1
56.6528	8.0896	1
3.1488	0	1
3.6352	0	1
38.0928	8.0128	1
73.8048	9.4464	1
8.6784	0	1
59.3152	11.6224	1
30.5664	6.5536	1
29.2608	6.1696	1
76.4416	18.7648	1
12.1856	0	1
1710.18	453.709	1
41.5488	7.8336	1
58.5216	16.8192	1
31.2832	5.4272	1
31.7184	5.76	1
3.4304	0	1
32.3072	7.3216	1
63.616	13.312	1
3.1744	0	1
32.128	3.3536	1
35.9168	6.2208	1
5.4784	0	1
59.1104	14.3616	1
37.6064	5.632	1
3.84	0	1
35.0976	4.2496	1
8.1664	0	1
45.9264	5.8368	1
58.0096	13.5168	1
46.9504	7.5776	1
48.3584	11.8016	1
54.912	11.1616	1
10.9056	0	1
35.7888	2.6624	1
82.8672	19.84	1
6.0928	0	1
41.2416	6.2464	1
3.6096	0	1
27.5712	1.6384	1
66.4832	11.4944	1
38.9376	3.84	1
7.808	0	1
48.896	5.12	1
63.5136	10.3168	1
49.92	0	1
44.6464	5.9136	1
358.707	114.278	1
30.5664	5.0944	1
6.4	0	1
61.312	11.3152	1
5.4784	0	1
19.584	0	1
49.9712	14.2848	1
67.0208	15.232	1
4.1984	0	1
35.4048	0.3328	1
4.8896	0	1
148.301	32.9472	1
33.8176	4.3008	1
35.072	3.9168	1
3.4816	0	1
42.7776	7.168	1
1690.04	273.894	1
77.568	21.632	1
67.7632	6.6816	1
14.4384	0	1
29.2608	0.0512	1
11.6224	0	1
33.7408	2.7392	1
2.6112	0	1
41.1136	7.0144	1
950.733	182.195	1
32.8704	5.4272	1
4.0704	0	1
5.376	0	1
21.8368	6.1696	1
7.936	0	1
10.6496	0	1
90.368	18.5088	1
4.8128	0	1
3.4048	0	1
10.0608	0	1
11.3152	0	1
28.1088	3.6352	1
481.613	21.8112	1
12.288	0	1
45.8752	0	1
84.7872	12.5696	1
46.1568	9.7792	1
38.8352	3.6608	1
28.7232	5.1712	1
36.1216	6.5536	1
32.3072	8.7808	1
59.904	5.5552	1
20.1472	4.4544	1
141.133	26.112	1
36.7872	10.6752	1
36.6848	7.7056	1
4.7104	0	1
22.8864	0.2304	1
56.9344	14.2592	1
32.4864	5.4272	1
29.5936	1.5104	1
37.3248	5.8112	1
5.0432	0	1
7.7056	0	1
2.688	0	1
30.2336	3.4816	1
35.1488	5.4016	1
48.2816	1.7408	1
69.888	14.8224	1
37.7344	3.5328	1
30.9248	2.7904	1
30.6432	3.1744	1
87.6032	19.3024	1
35.7632	5.5552	1
31.1808	5.1968	1
4.0192	0	1
57.6	10.5216	1
43.3152	4.6336	1
49.92	11.008	1
23.3728	4.48	1
42.5216	8.0128	1
2.8928	0	1
60.544	12.5696	1
144.819	0.9472	1
15.7696	0	1
50.7392	13.696	1
83.2768	10.1632	1
38.9888	7.6544	1
169.37	44.288	1
50.6112	5.6832	1
29.1328	5.7088	1
6135.91	550.989	1
29.5424	6.5024	1
8.8576	0	1
5.8368	0	1
4.864	0	1
33.2544	6.6048	1
7.04	0.0256	1
9.472	0	1
6.912	0.0256	1
9.2672	0	1
59.6736	9.3696	1
10.1888	0	1
7.168	0.0256	1
5.5552	0	1
118.272	28.5696	1
3.4048	0	1
7.3728	0.0256	1
15.6416	0	1
14.0288	0	1
32.8448	0	1
48.1024	7.808	1
30.3872	8.0384	1
45.6704	3.9424	1
3.84	0	1
32.0768	3.1744	1
28.672	3.5328	1
39.2704	9.0112	1
29.1328	7.6032	1
34.7904	2.5088	1
3.0464	0	1
2.6624	0	1
56.7296	8.448	1
43.9552	6.1952	1
56.8576	8.8064	1
47.872	7.4496	1
47.0016	9.1392	1
31.2832	0	1
3.9424	0	1
34.5344	7.3984	1
139.187	36.096	1
63.0784	12.5696	1
28.8	0	1
49.28	13.2096	1
2.8672	0	1
7.7824	0	1
128.742	20.2752	1
16.1024	0	1
35.4304	7.6288	1
43.2128	7.8336	1
42.0608	2.176	1
95.4624	26.7776	1
37.4016	2.944	1
40.1152	7.2448	1
44.6208	9.9328	1
33.2032	6.3488	1
28.2624	0	1
53.8624	7.0656	1
3.2512	0	1
7.552	0	1
10.8544	0	1
14.0032	0	1
35.4304	7.04	1
7.68	0	1
6.528	0	1
35.8656	2.432	1
50.0224	6.784	1
3.456	0	1
37.12	5.4016	1
3.5328	0	1
38.4256	6.4768	1
49.4336	0	1
43.9808	3.9168	1
2.9696	0	1
230.886	52.5824	1
37.4016	6.8096	1
32.3072	7.7824	1
55.6544	8.6784	1
97.0496	22.9632	1
6.3232	0	1
7.8592	0	1
32.1792	0.128	1
40.576	8.2944	1
4.7872	0	1
21.12	0	1
6.0928	0	1
125.184	36.992	1
27.136	0	1
21.2736	0	1
3.1488	0	1
216.55	29.1328	1
4.224	0	1
33.0752	7.7056	1
39.7312	2.8928	1
39.3984	6.656	1
8.2432	0	1
34.0224	3.9168	1
8.4992	0	1
41.2672	7.168	1
8.7552	0	1
36.5568	1.8688	1
3.9168	0	1
7.8336	0	1
37.6064	6.4256	1
6.9376	0	1
56.6784	10.0608	1
61.8496	18.4832	1
31.5648	7.0912	1
28.7488	3.5072	1
4.5056	0	1
62.4128	6.6816	1
125.901	30.1568	1
46.2336	7.3472	1
3.8912	0	1
41.088	8.576	1
119.936	28.2624	1
32.4096	5.2736	1
5.5808	0	1
13.5424	0	1
164.864	29.1584	1
79.0272	18.4064	1
36.2496	7.4496	1
4.9408	0	1
30.6688	6.6304	1
11.1872	0	1
4.3264	0	1
33.792	7.2192	1
11.4688	0	1
38.3232	2.4576	1
40.1152	5.1968	1
42.496	9.3952	1
49.9456	8.5248	1
38.2976	4.2496	1
35.0208	6.5024	1
52.1472	13.8496	1
79.104	18.432	1
54.272	8.1664	1
9.6256	0	1
39.0912	5.4784	1
47.4624	9.4208	1
7.0656	0	1
46.976	10.1888	1
32.4608	4.0704	1
44.2112	8.2688	1
37.0688	7.9616	1
86.0928	21.7344	1
34.7136	7.3728	1
34.7648	1.8176	1
34.9696	6.1184	1
3.9424	0	1
14.4384	0	1
31.5648	7.1424	1
63.0016	3.9168	1
5.888	0	1
4.992	0	1
32.7936	1.4848	1
33.5616	5.9136	1
23.2192	3.84	1
13.7728	0	1
65.2544	17.4592	1
2190.31	303.104	1
122.419	31.6928	1
3.4816	0	1
58.3424	5.0432	1
42.8544	7.5264	1
5.9392	0	1
6.6048	0	1
62.8992	15.1808	1
9.5744	0	1
90.7008	11.136	1
42.752	5.888	1
36.8896	6.7328	1
42.0608	7.2448	1
678.144	142.438	1
72.8832	16.7424	1
31.6672	6.2208	1
5.7344	0	1
11.8016	0	1
20.096	0	1
9.1392	0	1
40.5504	7.8848	1
134.17	33.9968	1
31.8976	5.7088	1
34.0992	5.0944	1
3.968	0	1
47.5392	3.968	1
82.2016	11.648	1
37.6832	6.7584	1
7.1424	0	1
7.8592	0	1
98.3552	14.976	1
33.2032	4.992	1
215.373	37.504	1
6.2464	0	1
30.4384	7.8592	1
2.688	0	1
3.0464	0	1
13.4144	0	1
39.6288	3.8912	1
42.0352	5.7088	1
60.7232	12.1088	1
38.6304	8.2944	1
40.6784	3.1744	1
18.4832	2.4064	1
31.4624	5.3504	1
49.0752	6.6304	1
38.144	8.2432	1
2.9184	0	1
72.5248	10.496	1
32.8448	0	1
36.8896	6.528	1
31.4368	4.2752	1
6.272	0	1
11.8784	0	1
5.7856	0	1
9.0368	0	1
32.4864	7.2448	1
27.8784	5.6576	1
54.0416	9.9072	1
49.2544	10.3168	1
11.5456	0	1
5.0688	0	1
41.8048	8.7552	1
41.5232	4.5824	1
7.04	0	1
49.9712	12.8	1
39.1424	7.3728	1
34.1504	7.168	1
13.056	0	1
4.7616	0	1
55.8848	12.8	1
11.8016	0	1
5.5552	0	1
30.5664	4.0704	1
6.5024	0	1
524.339	101.632	1
6.9888	0	1
5.9392	0	1
6.2208	0	1
6.272	0	1
31.4624	3.8912	1
2.5856	0	1
4.6848	0	1
47.3856	7.9616	1
33.4848	0	1
6.0672	0	1
16.9472	0	1
59.5712	12.544	1
33.5872	4.096	1
3.328	0	1
5.7088	0	1
10.9824	0	1
31.6672	4.2752	1
43.6224	9.6512	1
54.1696	3.968	1
7.3472	0	1
21.8624	0	1
16.0768	0	1
3.2	0	1
51.6352	8.6272	1
10.5216	0	1
4.4544	0	1
76.1344	13.7472	1
13.3632	0	1
35.3024	3.0464	1
8.7552	0	1
37.4784	3.2768	1
718.234	155.136	1
47.104	12.1088	1
53.0432	9.4976	1
33.8432	3.328	1
38.016	2.304	1
43.2384	5.376	1
7.5776	0	1
53.5296	12.6208	1
101.427	29.184	1
173.158	18.5088	1
7.6032	0	1
37.1712	3.2256	1
11.3664	0	1
30.6432	5.76	1
31.5904	1.408	1
11.0848	0	1
29.2608	5.2992	1
118.656	26.2656	1
183.296	39.0656	1
64.0256	14.1312	1
40.576	9.0368	1
58.2144	10.9824	1
52.7616	8.96	1
20.7872	0	1
8.4736	0	1
6.528	0	1
41.0624	8.2688	1
69.376	17.2032	1
73.3952	16.256	1
165.658	48.64	1
55.5776	6.784	1
31.0272	4.6848	1
49.5872	5.8624	1
12.8256	0	1
51.6352	7.0144	1
68.0448	14.1824	1
3.1232	0	1
36.7872	4.4288	1
68.6336	11.9808	1
7.168	0	1
5.376	0	1
36.5312	6.144	1
35.7376	1.2288	1
33.536	4.8384	1
32.2304	3.712	1
20.8384	0	1
36.6336	4.736	1
6.1184	0	1
32.2048	4.6336	1
38.6048	5.7088	1
31.616	2.0224	1
4.0192	0	1
8.704	0	1
28.1088	2.9952	1
9.2416	0	1
43.1616	0	1
10.2144	0	1
50.9184	9.4208	1
31.6928	5.9136	1
59.4688	9.6512	1
34.5344	0	1
6.2464	0	1
42.8032	5.6064	1
20.5056	0	1
7.2192	0	1
6.0416	0	1
75.1872	9.5488	1
3.4304	0	1
67.1488	13.2352	1
4.608	0	1
10.6496	0	1
45.2608	7.0144	1
15.2832	0	1
6.6304	0	1
43.0848	4.5056	1
34.2016	5.3248	1
31.9232	2.048	1
25.7792	5.6576	1
84.1216	20.7872	1
98.2016	15.8208	1
64.6912	7.6544	1
262.272	37.4016	1
28.032	2.1248	1
15.4368	0	1
11.4176	0	1
34.6112	6.0928	1
15.6416	0	1
49.6896	8.448	1
9.2928	0	1
28.9024	3.584	1
46.2592	9.856	1
45.3888	6.0416	1
4.5056	0	1
33.0496	5.504	1
33.6384	3.328	1
34.7904	4.608	1
35.584	6.016	1
77.7728	11.5968	1
40.5248	6.8608	1
33.408	4.736	1
31.9488	0.7936	1
26.9568	1.5104	1
9.7792	0	1
29.4912	3.584	1
3.6608	0	1
42.368	10.3936	1
33.7152	3.6352	1
3.2256	0	1
6.9632	0	1
50.7904	15.5392	1
102.886	19.6352	1
36.4544	2.2528	1
33.0752	5.6832	1
35.5072	3.6096	1
74.4704	10.1632	1
6.912	0	1
35.4816	3.3792	1
3.2	0	1
8.6272	0	1
4.7872	0	1
10.88	0	1
15.3344	0	1
21.2224	1.408	1
53.9648	6.5792	1
35.0976	0	1
31.9744	2.432	1
279.654	12.1856	1
46.3872	7.936	1
6.2976	0	1
9.7024	0	1
56.704	10.5216	1
5.632	0	1
70.4	14.2848	1
68.0704	9.6512	1
150.81	41.9328	1
38.2208	6.784	1
9.0368	0	1
26.5984	5.1968	1
5.6064	0	1
19.2512	0	1
30.4128	3.2768	1
64.6656	10.9824	1
64.3072	17.3312	1
72.0384	0.2816	1
2.7136	0	1
4.0448	0	1
31.1552	5.1712	1
173.722	46.336	1
37.0176	2.432	1
5.8368	0	1
30.336	5.632	1
3.0464	0	1
31.0784	5.8368	1
30.1056	1.5104	1
48.6912	4.2496	1
37.0176	4.0192	1
30.5152	0	1
32.1536	2.3808	1
15.9488	0	1
39.552	3.328	1
34.6368	8.2432	1
56.2944	9.7024	1
72.6784	8.2432	1
6.9632	0	1
3.7888	0	1
4.3776	0	1
25.4976	0.6912	1
624.742	10.5728	1
21.8624	6.016	1
34.048	4.1984	1
50.8928	9.3696	1
36.4032	7.2192	1
5.1968	0	1
4.9408	0	1
9.7536	0	1
2.9184	0	1
37.1968	4.4544	1
6.144	0	1
60.8512	6.6048	1
8.7296	0	1
37.248	2.9184	1
14.6688	0	1
14.1568	0	1
661.581	130.662	1
6.8096	0	1
7.2448	0	1
29.7984	3.5584	1
42.3168	8.6016	1
51.6608	9.6	1
13.2096	0	1
3.712	0	1
5.8112	0	1
20.3776	0	1
32.6912	2.176	1
186.24	32.4096	1
6.4	0	1
67.1744	12.16	1
5.2224	0	1
153.677	20.4032	1
710.81	85.3504	1
82.3552	20.3264	1
49.5872	5.2992	1
30.4896	5.1712	1
39.7568	5.5552	1
3.7376	0	1
4.4544	0	1
33.2544	4.5824	1
57.8816	12.2624	1
35.5072	2.4832	1
63.872	10.496	1
33.6384	4.8128	1
8.192	0	1
56.6528	0	1
36.0192	6.1184	1
37.5552	2.7904	1
5.8368	0	1
18.4576	0.6656	1
11.4688	0	1
14.1056	0	1
42.5984	5.9136	1
10.88	0	1
6.8608	0	1
97.408	14.3872	1
58.624	11.8784	1
32.9216	6.6048	1
12.8256	0	1
35.584	1.92	1
65.9456	12.5696	1
39.0656	8.448	1
43.8784	2.5856	1
3.8656	0	1
32.512	3.9168	1
33.5616	0	1
4.7616	0	1
13.8496	0	1
10.1376	0	1
3.072	0	1
3.3536	0	1
8.704	0	1
15.7696	0	1
36.1472	3.3536	1
6.5536	0	1
5.8624	0	1
78.5152	14.848	1
3.6352	0	1
58.0608	10.3424	1
109.133	17.1776	1
39.6544	5.0944	1
6.6048	0	1
3.3792	0	1
38.9888	6.3488	1
34.048	5.1456	1
89.8816	14.2848	1
36.5056	2.9952	1
42.88	7.0144	1
92.4672	14.6432	1
8.3968	0	1
29.8496	5.2224	1
3.4304	0	1
84.8896	19.0976	1
36.8384	8.3712	1
19.4048	0	1
7.3728	0	1
32.6144	5.1968	1
6.7072	0	1
6.6304	0	1
72.0896	4.5056	1
4.1472	0	1
38.784	7.3728	1
23.8848	3.9936	1
37.6832	9.1904	1
46.336	8.4736	1
20.8128	0	1
125.798	29.9008	1
10.4704	0	1
2.6368	0	1
31.2832	5.9136	1
38.1952	7.0144	1
57.344	11.3664	1
4.48	0	1
50.9696	5.6832	1
9.0112	0	1
14.08	0	1
20.6592	0	1
5.4016	0	1
4.0704	0	1
45.056	6.0672	1
49.664	7.68	1
51.1232	8.9344	1
6.1696	0	1
6.8096	0	1
41.1904	5.3504	1
7.4752	0	1
11.7504	0	1
47.104	4.8384	1
30.72	2.5088	1
2.5856	0	1
35.9424	7.1424	1
3.4304	0	1
7.9616	0	1
58.8288	7.0656	1
57.5744	6.144	1
111.155	22.3488	1
104.038	19.6352	1
3.3024	0	1
30.336	4.3008	1
3.6352	0	1
2.816	0	1
17.5872	0	1
3.712	0	1
88.7296	21.0944	1
11.008	0	1
6.912	0	1
3.6864	0	1
7.1936	0	1
6.4512	0	1
71.5008	11.264	1
72.6016	9.9328	1
36.224	5.6064	1
3.3792	0	1
69.8112	10.8032	1
7.4752	0	1
50.9952	7.0144	1
558.157	100.301	1
130.79	37.1968	1
33.1264	2.944	1
54.016	8.704	1
90.1888	37.76	1
2.8416	0	1
90.2912	18.8672	1
43.7248	6.0672	1
120.576	0	1
50.176	7.68	1
30.0032	4.7872	1
50.944	8.1408	1
40.0384	4.48	1
57.5232	8.5504	1
46.8736	4.352	1
9.2416	0	1
28.8768	4.6848	1
7.1424	0	1
10.7008	0	1
31.104	4.608	1
27.5712	2.3552	1
4.9664	0	1
48.2048	8.8576	1
11.9296	0	1
56.9088	0	1
6.8608	0	1
39.808	7.552	1
15.5904	0	1
88.9088	27.2896	1
13.7216	0	1
42.4192	4.8128	1
12.7744	0	1
15.7184	0	1
29.0048	4.3776	1
66.9184	12.928	1
65.2288	13.6192	1
6.1696	0	1
32.0256	5.0176	1
3.7376	0	1
38.0416	5.2736	1
3.6096	0	1
3.9168	0	1
26.0864	2.048	1
28.1344	3.5072	1
72.4736	13.6448	1
31.5136	4.4032	1
46.2848	7.8592	1
37.632	6.0928	1
173.133	33.792	1
84.8896	21.4784	1
35.3536	6.3232	1
7.7824	0	1
13.8496	0	1
9.4976	0	1
2.6112	0	1
4.4288	0	1
4.5568	0	1
36.0192	2.1248	1
134.886	22.2976	1
2.6112	0	1
47.5136	7.1936	1
23.424	0	1
67.328	11.4944	1
12.5952	0	1
73.8816	13.0816	1
44.672	6.9376	1
45.1584	6.6048	1
188.186	48.7424	1
79.4368	16.1536	1
33.5104	4.9408	1
36.9408	3.5584	1
3.5584	0	1
3.3792	0	1
39.936	4.4288	1
63.7952	12.8512	1
123.366	6.144	1
3.4304	0	1
134.502	44.1856	1
4.8384	0	1
47.0016	10.0608	1
72.576	17.1008	1
28.544	3.5328	1
11.9296	0	1
61.4144	8.1152	1
6.6048	0	1
34.304	3.3536	1
2.944	0	1
70.5024	9.7792	1
10.9056	0.2816	1
100.198	21.0944	1
28.032	4.0704	1
43.8528	0	1
67.5328	12.1344	1
41.6768	4.224	1
36.0704	7.3472	1
6.656	0	1
5.2736	0	1
12.4416	0	1
7.296	0	1
39.68	2.4576	1
4.9664	0	1
31.7184	2.4064	1
32.8192	5.8112	1
3.0208	0	1
44.416	5.7344	1
8.2944	0	1
5.6832	0	1
34.2016	6.144	1
34.944	2.1504	1
11.52	0	1
37.4784	5.7088	1
98.4832	19.2512	1
32.4352	6.9376	1
11.9552	0	1
37.8624	0.9472	1
6.5792	0	1
41.728	3.4048	1
78.1312	0	1
4.3264	0	1
1910.99	397.466	1
39.1424	4.4288	1
4.864	0	1
14.7456	0	1
4.4544	0	1
65.4336	13.7472	1
6.4256	0	1
79.0784	12.9792	1
12.8	0	1
33.8176	3.584	1
5.6832	0	1
61.6192	9.4976	1
446.208	5.6832	1
12.9024	0	1
78.4896	13.9776	1
38.0928	6.8864	1
30.4384	2.7648	1
11.7248	0	1
7.5776	0	1
2.8672	0	1
184.627	34.9184	1
2.7648	0	1
5.4528	0	1
39.4752	5.376	1
13.2864	0	1
8.064	0	1
38.5024	5.0432	1
2.5856	0	1
9.8816	0	1
2.6624	0	1
61.5168	12.9792	1
103.654	17.7152	1
7.2704	0	1
3.9424	0	1
32.1024	4.9664	1
14.1824	0	1
593.562	123.648	1
9.0368	0	1
5.2736	0	1
11.8016	0	1
71.1936	17.8944	1
30.2848	4.2752	1
24.4736	1.8688	1
6.6304	0	1
4.864	0	1
14.8224	0	1
36.864	5.0432	1
9.984	0	1
3.584	0	1
3.4816	0	1
10.3168	0	1
43.9296	5.4016	1
7.5776	0	1
36.736	5.12	1
100.915	13.3888	1
29.4656	3.4048	1
24.8576	4.608	1
58.6752	10.0608	1
11.52	0	1
31.4368	2.8672	1
7.9616	0	1
7.8336	0	1
65.5616	11.8272	1
7.0144	0	1
4.7104	0	1
14.1824	0	1
30.6944	4.1984	1
34.2528	4.9664	1
33.28	6.2464	1
44.1344	4.096	1
70.8096	12.8768	1
38.2208	6.9888	1
28.16	3.1488	1
6.528	0	1
38.4256	2.3808	1
5.7856	0	1
64.0512	12.288	1
2.688	0	1
6.7584	0	1
25.216	0.5632	1
66.7648	11.9552	1
3.712	0	1
36.0704	3.0976	1
37.8112	5.4528	1
10.5728	0	1
8.32	0	1
39.5008	5.9136	1
4.5056	0	1
41.9328	5.1456	1
8.448	0	1
36.1728	3.5072	1
2.8672	0	1
322.509	57.5744	1
35.84	4.3008	1
3.3792	0	1
41.4208	3.8656	1
8.704	0	1
32.7424	4.7616	1
2.6112	0	1
2.7392	0	1
11.136	0	1
45.0048	5.4016	1
8.5248	0	1
4.5824	0	1
24.8576	3.4048	1
41.9072	6.3744	1
6.144	0	1
14.592	0	1
24.064	0.8192	1
5.248	0	1
42.7264	8.9088	1
34.2016	5.6576	1
12.7744	0	1
7.6032	0	1
6.6048	0	1
8.448	0	1
8.6528	0	1
21.1712	3.2256	1
19.0208	0	1
105.037	17.5872	1
11.2384	0	1
9.216	0	1
48.9216	8.2432	1
35.3792	6.8864	1
35.4048	2.816	1
5.504	0	1
10.1376	0	1
84.3776	6.4768	1
9.2928	0	1
4.224	0	1
36.0704	6.3744	1
2.8416	0	1
73.472	15.3088	1
171.955	33.152	1
37.2992	2.9952	1
2.944	0	1
47.9232	5.76	1
28.9792	2.432	1
7.936	0	1
2.944	0	1
34.688	5.8368	1
16.256	0.2304	1
37.2992	3.1232	1
3.8144	0	1
37.0688	2.1504	1
10.5728	0	1
146.534	31.8976	1
12.6464	0	1
511.949	102.221	1
4.5568	0	1
6.1696	0	1
[truncated: 29,361 more rows]

## Sheet: Fig 5 Supp 1A raw p putida
droplet_area	cell_area	repeat
1604.99	149.99	1
15.3344	0	1
145.254	11.904	1
70.8352	4.8128	1
30.72	0.8192	1
119.936	11.776	1
62.1824	2.2272	1
51.2	5.0944	1
28.5952	0.896	1
195.763	13.3632	1
132.506	10.8544	1
96.6656	9.472	1
3.7632	0	1
228.531	25.3952	1
11.0848	0	1
13.0816	0	1
110.848	5.6576	1
66.0224	2.7648	1
62.1824	5.2736	1
110.95	5.8368	1
105.242	4.9152	1
79.488	4.3264	1
123.648	12.928	1
49.5104	4.6592	1
162.611	0	1
78.7968	6.4768	1
4.5056	0	1
7.3984	0	1
146.048	5.9136	1
96.128	7.0144	1
63.4112	1.8432	1
1122.36	88.1664	1
511.309	44.3904	1
144.717	16.2304	1
138.138	7.7056	1
53.9904	1.8688	1
5.76	0.1536	1
76.8	6.5024	1
171.597	13.5936	1
15.5648	0	1
136.883	8.6016	1
73.3952	6.3744	1
417.126	32.9472	1
172.288	7.424	1
104.96	2.432	1
112.102	6.2464	1
66.8672	5.3248	1
299.955	31.1552	1
164.326	5.3248	1
261.171	14.8224	1
120.525	8.6272	1
50.8672	2.8416	1
91.6736	7.5776	1
82.0224	8.4224	1
65.7152	3.2768	1
4.4544	0.2048	1
99.7376	7.4752	1
59.3664	4.4288	1
84.9408	7.1936	1
66.0992	2.9952	1
4.5824	0	1
71.4752	6.3744	1
320.41	20.3264	1
90.9568	4.608	1
385.51	36.864	1
146.304	16.3328	1
111.949	10.9056	1
41.5488	1.664	1
163.994	13.9264	1
6.2208	0	1
320.87	32	1
100.07	7.0144	1
205.85	14.7968	1
97.6128	3.7376	1
135.168	9.088	1
153.037	11.776	1
61.3888	3.968	1
477.824	42.2912	1
116.608	10.24	1
117.171	6.8352	1
95.1808	8.4736	1
182.989	14.1056	1
130.867	16.3072	1
249.882	17.408	1
94.9504	7.3472	1
103.142	4.1984	1
247.808	11.9552	1
104.294	7.8592	1
86.784	6.1184	1
120.499	8.704	1
117.683	9.2672	1
81.3568	3.072	1
92.8768	7.0144	1
58.0352	4.8896	1
57.8304	2.4832	1
35.1488	3.1488	1
94.8992	2.4576	1
183.45	14.2848	1
74.9312	5.12	1
57.8816	1.9968	1
70.528	5.1968	1
190.413	13.0304	1
46.0032	2.6112	1
75.0592	6.1696	1
211.226	13.4912	1
77.9008	7.1424	1
115.917	4.608	1
213.35	21.2224	1
69.376	4.1728	1
96.5888	7.8336	1
166.118	17.5616	1
169.549	12.4928	1
107.827	9.2928	1
64.2816	4.7104	1
71.6544	3.6352	1
114.048	6.016	1
94.2592	2.3296	1
178.842	16.5888	1
81.7664	7.0144	1
327.168	28.672	1
173.133	13.0304	1
70.6048	2.0992	1
85.376	5.4016	1
89.5232	7.6544	1
76.9024	5.6832	1
107.827	4.2496	1
183.424	3.7632	1
109.594	7.5008	1
97.7664	4.3008	1
28.16	1.5872	1
173.798	20.7872	1
121.549	9.3696	1
72.4224	3.328	1
96.256	6.6304	1
81.5616	5.7088	1
117.734	9.2928	1
81.8688	7.1936	1
418.842	42.112	1
2.7136	0	1
107.802	7.4496	1
136.038	6.4768	1
64.384	5.0944	1
1395.15	96.384	1
573.824	43.3152	1
138.086	15.6416	1
151.731	12.3904	1
83.7376	2.5856	1
68.7104	3.968	1
370.074	49.3824	1
150.758	13.312	1
59.648	5.5296	1
46.0288	1.7664	1
47.8208	5.9136	1
138.445	10.2144	1
51.5584	2.6368	1
81.8432	4.4032	1
229.376	15.9232	1
19.456	3.0464	1
2.816	0	1
86.4768	4.8896	1
3.7888	0	1
262.912	27.0592	1
87.5776	6.6304	1
3.9424	0	1
92.1344	6.5536	1
81.4848	9.1648	1
270.95	22.7072	1
84.4032	5.4016	1
26.8288	1.5872	1
115.686	5.9136	1
59.9808	4.352	1
135.27	11.0848	1
3.8144	0	1
284.979	32.0256	1
51.8144	2.688	1
113.946	5.6832	1
137.984	11.2896	1
194.483	13.3632	1
91.8784	7.3728	1
84.096	6.144	1
67.2512	5.0688	1
96.4096	8.6528	1
155.136	13.9008	1
145.254	15.1808	1
3.3792	0	1
78.336	5.0688	1
94.336	7.5264	1
127.258	8.1408	1
7.1168	1.4336	1
95.8464	8.2944	1
163.405	14.7456	1
40.9344	1.792	1
90.7776	7.5776	1
66.3808	4.5312	1
125.926	10.4448	1
63.9744	3.0464	1
124.083	13.3632	1
371.558	36.0448	1
45.1072	1.5104	1
105.242	8.3712	1
112	5.5552	1
40.448	3.9424	1
159.59	15.36	1
50.5088	3.328	1
85.248	9.0368	1
2.7904	0	1
136.448	16.2816	1
126.771	11.6736	1
81.6128	6.656	1
37.6832	0.3328	1
81.1776	6.4256	1
2.6112	0	1
40.0128	1.8432	1
79.0528	2.9696	1
163.84	21.6832	1
112.794	7.0912	1
75.1872	5.0944	1
97.2544	3.968	1
202.291	19.9936	1
75.52	4.5568	1
231.91	20.992	1
4.1728	0	1
42.5472	1.8176	1
259.379	31.8208	1
124.083	14.3104	1
149.862	11.7504	1
92.544	7.0912	1
62.976	2.56	1
136.038	10.112	1
67.2768	5.1712	1
136.602	13.1328	1
92.416	3.072	1
301.286	14.5408	1
118.195	3.5328	1
193.997	19.5328	1
75.1616	6.6816	1
39.8848	1.2288	1
124.467	10.9824	1
38.016	1.9456	1
62.6176	3.6608	1
118.477	7.3984	1
299.648	25.1392	1
76.544	4.224	1
74.8288	4.352	1
172.646	21.0176	1
103.168	8.7296	1
222.592	13.1072	1
3.2512	0	1
19.3792	0.64	1
154.342	18.9952	1
2387.94	177.715	1
73.6768	4.864	1
67.1488	4.0704	1
81.3312	6.144	1
83.9936	6.5792	1
52.3008	2.56	1
124.262	7.424	1
66.3296	4.1728	1
94.592	6.4768	1
4089.55	62.2592	1
89.5232	7.3472	1
184.704	24.448	1
3.328	0	1
155.366	13.4912	1
3.5328	0	1
258.995	21.5552	1
191.846	9.2416	1
224.384	22.0416	1
84.352	3.2512	1
10.7264	2.4832	1
4.224	0	1
66.1504	2.944	1
90.9056	9.5744	1
165.171	12.3136	1
84.9664	5.3248	1
348.083	40.2944	1
136.09	11.3664	1
11.264	1.5616	1
97.6384	7.5776	1
112.563	9.0624	1
80.0512	4.2496	1
84.9152	4.0192	1
83.2512	4.0192	1
228.122	15.0272	1
118.554	9.8304	1
86.9376	5.4016	1
102.784	9.2672	1
80.3328	5.632	1
97.6128	6.7584	1
41.6256	1.5616	1
85.5296	7.808	1
82.8928	4.5568	1
76.0064	4.4544	1
226.458	27.6992	1
3.3792	0	1
1113.65	85.6832	1
3.3536	0	1
95.6672	6.1184	1
170.163	15.9232	1
106.88	8.0896	1
81.7408	7.5776	1
253.645	17.9456	1
187.085	20.6848	1
89.1392	7.8848	1
124.698	9.7024	1
90.112	5.6832	1
141.389	11.52	1
146.918	11.4432	1
94.2336	5.9392	1
137.523	9.856	1
818.637	13.0304	1
81.8688	5.888	1
89.2672	6.2208	1
65.5872	5.0944	1
3.9168	0	1
67.4048	3.5072	1
149.606	20.9664	1
295.552	23.2448	1
82.6624	7.7824	1
189.21	5.4528	1
74.9824	6.0672	1
89.856	5.248	1
428.8	34.9952	1
176.563	4.6592	1
223.462	19.0208	1
98.0992	8.4224	1
52.0704	1.8432	1
15.1552	0	1
131.533	7.5776	1
3.328	0	1
254.106	21.4272	1
154.342	16.7168	1
271.334	19.328	1
113.715	7.808	1
125.491	5.9904	1
720.947	65.024	1
105.267	6.656	1
5.7344	0	1
109.466	7.296	1
66.7648	4.2496	1
146.688	6.1184	1
40.7808	1.408	1
69.76	4.1728	1
182.118	24.1152	1
23.3984	5.9392	1
406.298	26.9312	1
80.6912	4.3008	1
26.8544	1.6384	1
78.4384	6.8608	1
111.923	8.6528	1
164.634	21.504	1
188.698	12.2112	1
71.2192	2.944	1
115.328	10.1376	1
111.334	10.4448	1
46.3616	4.7616	1
111.462	8.1152	1
6.912	0.5632	1
163.994	15.8976	1
47.0016	2.7392	1
318.387	40.9856	1
94.7968	6.528	1
60.1344	2.1504	1
91.4432	5.2224	1
92.9792	7.552	1
89.7792	7.1424	1
87.1168	5.7856	1
45.9264	1.9712	1
112.512	8.32	1
86.8864	5.12	1
59.1872	6.0416	1
61.2608	4.8384	1
62.336	4.0704	1
69.376	4.9408	1
1196.54	117.734	1
123.085	1.6384	1
60.288	2.7136	1
113.152	5.5808	1
255.744	33.152	1
65.8432	6.7072	1
96.512	5.9904	1
258.611	38.0672	1
36.736	1.8688	1
7.3472	0	1
45.4144	0	1
123.571	10.0096	1
69.0176	6.2464	1
109.645	7.168	1
138.01	8.4224	1
94.7712	5.6832	1
274.253	35.2	1
121.242	9.2416	1
54.2464	2.7648	1
77.0048	0.3328	1
7.7824	1.3568	1
231.27	8.6016	1
143.898	6.7584	1
86.4768	6.1184	1
3.456	0	1
500.198	19.2768	1
60.8768	4.1984	1
151.782	15.0784	1
262.195	18.4576	1
151.834	9.9072	1
85.7344	3.8656	1
58.24	5.5808	1
105.728	2.2784	1
93.9008	7.1936	1
69.12	2.432	1
2.9952	0	1
36.6592	4.864	1
115.328	5.0944	1
191.744	12.4928	1
128.435	9.7792	1
30.7968	2.8416	1
48.5632	6.912	1
50.2528	4.1216	1
3.8144	0	1
67.3536	5.4016	1
95.488	5.2224	1
93.44	8.3456	1
73.8304	5.1456	1
84.0448	6.5536	1
57.728	3.6608	1
91.3664	5.888	1
45.2608	1.3568	1
58.2912	4.4288	1
85.6576	5.7856	1
123.392	10.6752	1
3.6864	0	1
106.24	6.1184	1
3.6608	0	1
164.557	7.3472	1
3.0464	0	1
184.474	13.1328	1
99.0976	5.4528	1
109.03	7.5776	1
75.1872	4.8896	1
46.9248	2.9696	1
189.133	22.5024	1
218.88	25.216	1
3.6608	0	1
101.786	8.0128	1
188.006	13.3376	1
70.2464	1.4336	1
75.52	3.7376	1
7.2448	1.0752	1
233.677	16.768	1
117.786	10.8032	1
251.776	7.6288	1
76.3648	5.6832	1
4.4032	0	1
101.76	7.9616	1
125.082	12.8	1
97.8944	8.192	1
42.4704	2.5088	1
68.224	1.9456	1
231.245	22.1184	1
115.328	5.12	1
466.304	55.936	1
107.264	9.4208	1
111.898	7.2448	1
95.36	4.2496	1
181.094	9.5488	1
284.57	29.5168	1
184.397	16.8448	1
71.296	5.2992	1
102.605	9.0112	1
74.496	3.6608	1
148.352	14.0288	1
64.2304	3.2256	1
102.477	8.9088	1
154.445	15.9744	1
80.5888	4.6336	1
95.5392	3.3024	1
109.235	9.8816	1
78.3104	6.8352	1
58.4704	3.9424	1
116.07	10.5216	1
95.5136	8.1408	1
99.7888	4.9408	1
93.2352	3.5328	1
121.958	4.7104	1
41.2416	2.0224	1
90.24	4.5824	1
93.0048	9.856	1
1881.52	145.946	1
118.246	9.4464	1
114.534	14.4128	1
199.706	16.4352	1
124.851	9.344	1
74.24	8.4736	1
76.3392	3.4048	1
144.23	5.6064	1
2.7648	0	1
131.994	9.9584	1
8861.11	477.542	1
190.08	21.7088	1
1085.06	85.9136	1
148.608	9.0624	1
92.6464	6.7584	1
91.7504	5.0176	1
444.416	38.6304	1
75.6736	4.096	1
3.3536	0	1
49.8176	2.2784	1
58.8544	2.2016	1
110.003	6.8096	1
128.947	13.1328	1
120.602	10.1632	1
98.816	5.504	1
46.208	1.0752	1
74.4704	6.2464	1
2.944	0	1
6.272	0	1
413.85	26.7776	1
53.2992	3.4816	1
149.862	12.8768	1
102.451	5.0688	1
2.7392	0	1
67.5072	4.4544	1
83.5072	3.8912	1
79.3344	6.528	1
81.5616	4.5824	1
79.1296	5.9648	1
4.608	0	1
40.3968	4.3264	1
69.1712	6.1952	1
99.456	5.9904	1
128.384	5.4784	1
3.0976	0	1
187.955	19.5072	1
77.1584	6.272	1
97.7664	7.68	1
2.944	0	1
17.536	0	1
93.4912	4.3008	1
201.216	14.6944	1
83.6608	5.2224	1
84.1472	6.2976	1
100.352	4.6336	1
8.3968	1.152	1
4.7616	0	1
4.2496	0	1
1412.3	147.174	1
70.2464	4.096	1
286.899	18.6112	1
159.872	11.2128	1
15.5136	4.6848	1
182.784	17.2544	1
102.093	8.6016	1
269.67	42.496	1
79.3856	4.5312	1
35.6608	1.5104	1
3.0976	0	1
82.3808	2.8928	1
85.9904	5.632	1
3.6096	0	1
106.47	11.2128	1
147.635	6.7072	1
155.315	13.568	1
53.7856	6.1952	1
135.91	6.6304	1
9.8304	3.456	1
115.149	7.6032	1
110.515	9.472	1
43.1104	3.8656	1
79.872	5.7856	1
2856.86	348.39	1
166.528	16.1536	1
252.723	15.4368	1
49.2032	5.2224	1
66.4064	6.016	1
76.0576	3.9168	1
142.208	12.7488	1
58.2656	4.2496	1
349.722	18.0992	1
71.2448	4.4288	1
95.8208	8.32	1
72.2944	5.4528	1
602.138	91.392	1
55.424	0.6656	1
131.814	10.8288	1
149.094	13.3376	1
710.81	44.4416	1
144.64	11.008	1
52.0192	1.792	1
39.7568	0.2816	1
111.949	8.2176	1
51.7888	3.072	1
15.0528	1.5104	1
66.4832	2.56	1
252.979	23.8592	1
4.352	0	1
56.6784	2.5088	1
64.9472	3.968	1
58.6496	6.016	1
47.9744	3.4048	1
71.3984	3.6608	1
107.443	6.8864	1
134.784	6.656	1
60.8	2.9184	1
252.979	15.0272	1
104.013	9.4464	1
81.1776	1.9456	1
320.666	32.4608	1
88.6528	5.4528	1
71.9616	5.0176	1
54.5792	2.6624	1
73.4208	4.5824	1
65.9712	3.5072	1
163.251	10.7776	1
82.56	3.8912	1
58.496	2.2784	1
84.6336	4.8384	1
100.992	8.3712	1
101.274	6.7328	1
53.9136	5.0176	1
74.9312	6.0672	1
85.9648	5.9392	1
107.315	4.096	1
286.643	22.784	1
314.547	22.8608	1
232.602	15.2064	1
65.7152	3.3536	1
122.624	9.2672	1
230.784	18.5088	1
128.282	13.312	1
81.7408	3.84	1
175.283	11.4176	1
79.2832	3.456	1
64.256	1.5872	1
153.114	6.528	1
207.053	21.632	1
183.885	14.6432	1
155.725	7.2192	1
290.381	21.2736	1
69.248	2.4576	1
108.749	6.5536	1
62.72	3.6864	1
109.824	7.296	1
232.934	10.8032	1
47.4368	2.1248	1
89.5232	6.4	1
2871.78	179.43	1
85.2992	5.5808	1
126.336	7.1168	1
82.56	3.6352	1
111.206	5.3248	1
36.0704	2.2272	1
408.627	24.96	1
49.7152	2.3808	1
64.1024	3.968	1
188.032	4.8128	1
291.43	26.2144	1
141.542	9.088	1
3.4816	0	1
78.208	8.6016	1
45.0048	1.8944	1
67.5072	5.4016	1
122.65	6.3488	1
214.477	15.9232	1
75.6992	5.4272	1
95.36	3.3024	1
45.1584	1.408	1
102.63	5.6576	1
71.7056	3.1744	1
228.326	24.6784	1
186.061	21.248	1
55.552	1.664	1
65.28	3.3792	1
106.931	4.9408	1
95.616	5.8624	1
11.5712	2.0992	1
47.36	1.3824	1
109.926	5.2992	1
75.5712	4.736	1
359.68	22.912	1
87.7056	5.4016	1
107.52	6.7072	1
139.776	7.2704	1
60.7488	6.3232	1
159.693	9.856	1
54.016	2.4064	1
172.442	14.2848	1
69.9648	1.1776	1
142.541	7.7568	1
137.498	11.1616	1
57.1392	4.9664	1
46.6176	1.4848	1
76.4416	3.4816	1
118.784	7.6544	1
75.904	5.5808	1
59.9296	1.6896	1
86.6048	1.8688	1
99.2512	3.584	1
63.744	3.4816	1
69.0688	1.4592	1
114.227	5.8368	1
66.4064	3.2	1
72.8576	5.504	1
259.456	20.608	1
114.432	7.6288	1
50.0736	3.328	1
57.1136	3.0208	1
67.2768	3.6608	1
37.8368	3.1232	1
85.5552	1.8176	1
122.317	11.7248	1
2.9184	0	1
76.3392	1.92	1
117.99	4.5312	1
65.792	2.5344	1
70.144	0.64	1
187.75	13.056	1
8.8064	0	1
51.9424	3.9168	1
65.8944	2.6624	1
84.9152	5.4528	1
90.24	6.3232	1
79.3856	3.2256	1
98.4576	7.9616	1
101.811	7.1424	1
12.2624	1.2544	1
148.173	10.9312	1
62.8736	3.5584	1
109.056	8.5248	1
99.7888	6.7584	1
208.614	25.4976	1
70.784	3.2512	1
83.4048	3.6608	1
77.568	3.8656	1
3.7888	0.0256	1
101.786	5.2736	1
234.675	22.8096	1
379.008	14.7968	1
85.0432	6.784	1
248.32	15.5392	1
104.371	5.3248	1
98.6624	6.1952	1
2.9952	0.128	1
67.9424	5.376	1
34.3808	4.0448	1
71.0144	4.4544	1
155.827	10.2656	1
54.5024	5.6576	1
4.0704	0	1
166.451	5.2224	1
44.1088	1.7664	1
123.392	7.2448	1
96.2816	7.0656	1
171.597	8.576	1
120.806	8.0128	1
362.035	26.3936	1
70.4	5.3248	1
76.5184	2.7392	1
80.64	3.968	1
124.134	7.296	1
98.2272	6.8864	1
44.5696	1.7664	1
118.835	6.912	1
34.56	1.408	1
179.712	10.4704	1
83.456	4.6592	1
69.2992	4.224	1
75.7248	4.2752	1
129.741	7.808	1
166.118	17.024	1
117.939	5.0176	1
279.04	21.9648	1
96.256	7.1424	1
146.278	9.8816	1
12.9024	3.8144	1
651.443	53.8368	1
198.477	20.992	1
110.746	5.8624	1
13.9008	1.5872	1
165.786	11.8016	1
102.323	5.6832	1
71.3984	4.6848	1
98.688	5.9392	1
160.179	16.9728	1
68.7616	4.8896	1
86.784	3.9936	1
82.6112	5.8368	1
18.8672	1.3568	1
63.488	4.48	1
79.616	7.4496	1
77.824	3.5328	1
132.915	7.68	1
196.378	16.7424	1
66.944	4.3776	1
64.256	5.7856	1
174.336	10.4448	1
497.92	30.1056	1
26.7008	0.256	1
102.067	1.9712	1
93.6704	10.112	1
226.842	18.5856	1
41.4464	1.9456	1
73.3952	5.6576	1
111.437	7.552	1
200.858	18.56	1
90.4192	6.6304	1
60.6464	2.304	1
96.3584	7.4496	1
131.635	12.16	1
77.0304	6.7072	1
102.579	6.528	1
98.6112	4.608	1
85.2992	2.7136	1
103.066	6.7072	1
86.8608	2.6112	1
85.504	4.6848	1
54.5024	0.8704	1
77.0304	4.9664	1
52.7104	3.072	1
46.5408	1.3312	1
142.413	7.8336	1
40.8576	3.2256	1
69.5552	4.8384	1
129.664	5.8624	1
116.864	10.4448	1
130.099	11.6736	1
52.8128	2.2016	1
318.08	32.6656	1
108.928	3.6352	1
153.933	16.7424	1
130.048	10.0608	1
90.4448	5.248	1
81.3568	6.3488	1
185.958	14.336	1
106.291	4.2752	1
107.622	6.6304	1
127.795	13.8752	1
842.496	35.9936	1
2.6368	0	1
130.227	7.8336	1
38.4768	1.8688	1
70.1696	2.56	1
93.568	5.2224	1
72.0384	4.2752	1
132.531	9.1392	1
64.9216	2.7136	1
135.194	10.1888	1
39.936	2.0992	1
10.4704	2.2272	1
132.173	8.5504	1
220.851	15.104	1
129.766	5.9136	1
100.787	8.4736	1
11.52	2.1504	1
3041.33	186.112	1
144.435	11.4432	1
56.7296	1.7664	1
113.28	10.9568	1
172.083	7.2192	1
82.9952	5.7344	1
184.55	13.44	1
93.8496	5.5552	1
138.982	7.2448	1
222.515	22.8352	1
72.9856	4.4288	1
91.8272	3.5072	1
176.256	9.856	1
76.4416	3.7632	1
123.443	8.1152	1
110.362	9.2672	1
127.923	10.1888	1
174.976	11.6224	1
71.7056	3.8144	1
83.2256	6.5024	1
66.4576	10.3424	1
74.9056	4.8128	1
198.656	13.44	1
119.04	7.7568	1
155.085	8.7296	1
46.592	3.5328	1
57.6768	2.9184	1
80.2816	2.5344	1
12.7488	0	1
64.7424	5.6576	1
57.4208	2.432	1
158.438	11.776	1
63.7184	4.5568	1
3.456	0	1
97.2288	6.7072	1
91.5712	10.4448	1
142.874	8.0896	1
82.1248	4.5824	1
83.8144	6.4	1
326.118	33.4848	1
54.1952	5.7856	1
99.5584	3.456	1
86.912	6.4	1
4.3776	0	1
104.064	8.8064	1
41.6256	1.7408	1
265.472	26.1376	1
91.136	5.5296	1
95.8464	8.7552	1
255.002	15.9744	1
52.0192	2.2272	1
153.242	15.9232	1
66.8416	5.7344	1
196.454	16.7936	1
171.827	12.0832	1
68.3008	5.1968	1
111.821	7.7824	1
199.014	14.6688	1
3.9168	0	1
127.386	7.0144	1
140.902	3.2	1
165.171	14.08	1
95.8208	10.5472	1
372.608	21.8368	1
136.013	6.5792	1
3.328	0	1
466.253	49.536	1
3.0464	0	1
254.157	16.9472	1
8.8064	3.7632	1
5.4528	0	1
81.8432	5.8368	1
5.76	0	1
132.429	7.808	1
63.2576	4.48	1
82.8672	3.8912	1
99.8656	5.2224	1
121.933	6.912	1
99.84	7.424	1
346.445	32.4608	1
139.213	15.5904	1
101.069	9.1392	1
10.1632	0	1
4.4032	0	1
54.1696	7.0656	1
259.072	23.7568	1
73.9072	2.8928	1
82.56	5.4784	1
121.907	11.52	1
84.7872	5.0944	1
115.2	5.2736	1
412.339	37.3248	1
559.667	40.1408	1
185.472	13.0304	1
67.7888	4.2496	1
128.256	7.9872	1
60.2368	5.248	1
10.5216	0	1
56.1152	3.0464	1
150.707	11.6736	1
76.5696	5.0944	1
85.248	4.5568	1
148.147	9.728	1
75.2128	7.2704	1
126.413	7.6032	1
279.117	23.5776	1
143.002	13.3888	1
100.045	8.8832	1
97.92	4.736	1
38.528	1.5872	1
112.102	8.1408	1
107.827	13.0048	1
483.277	50.048	1
107.597	7.4752	1
5.3504	0	1
78.6432	4.1216	1
12.0576	1.3312	1
127.872	9.0624	1
82.2016	4.0704	1
67.2	4.2496	1
138.214	11.5968	1
56.8576	4.8384	1
4.8128	0	1
3.2	0	1
4.3264	0	1
132.275	11.8272	1
94.0288	6.016	1
400.666	23.6544	1
148.813	12.2368	1
122.854	7.3216	1
63.232	4.7872	1
4.224	0	1
69.7856	4.864	1
194.33	17.7408	1
91.136	10.2144	1
65.5616	5.6576	1
41.6512	2.1248	1
4.224	0	1
70.272	4.2752	1
4.3008	0	1
349.184	14.1312	1
33.0752	2.7904	1
59.0336	2.2528	1
78.1312	6.2208	1
193.741	14.464	1
98.9952	8.1152	1
101.478	5.0944	1
124.442	6.4256	1
81.4336	4.9408	1
207.309	15.6672	1
102.272	4.992	1
89.344	3.9936	1
109.491	8.3712	1
197.606	12.0064	1
80.4608	4.5056	1
46.6688	1.6896	1
95.9744	8.6784	1
5.9648	0	1
706.637	64.4096	1
335.77	27.4176	1
66.0736	9.4208	1
54.6816	3.072	1
68.9152	2.56	1
88.1152	7.3216	1
59.4944	4.6592	1
168.781	11.2128	1
73.3952	4.4288	1
64.6656	3.9936	1
64.512	5.5296	1
110.259	8.2688	1
96.7168	4.7616	1
85.504	4.3008	1
112.768	9.2928	1
121.779	11.0336	1
763.136	79.3344	1
76.1856	4.7616	1
64.5376	3.5072	1
2.8672	0	1
395.853	51.3792	1
137.779	11.904	1
126.234	9.1904	1
32.64	2.3808	1
433.664	46.976	1
143.002	10.1888	1
7.0656	0	1
60.8768	2.6624	1
134.195	6.3232	1
97.92	4.8384	1
79.5392	4.6336	1
327.552	38.9888	1
7.2448	0	1
84.5568	4.7616	1
126.848	8.3456	1
75.776	3.2512	1
12613	835.891	1
126.925	16.4352	1
162.586	14.592	1
963.405	72.5248	1
86.2976	6.9888	1
51.6608	2.5088	1
47.36	1.2544	1
149.811	10.2656	1
92.1088	5.504	1
4.6592	0	1
276.07	19.712	1
95.4368	10.5728	1
133.402	9.6512	1
170.701	11.4432	1
167.142	10.6752	1
82.4832	3.7632	1
95.7184	6.5792	1
10.4448	0	1
137.421	13.6704	1
74.624	4.7104	1
61.8496	6.2464	1
145.28	7.1936	1
74.8288	4.3264	1
101.632	6.912	1
84.5056	6.2208	1
78.08	1.408	1
156.262	11.648	1
113.587	8.3968	1
62.6944	6.6304	1
122.24	8.1664	1
299.827	29.5168	1
4.6848	0	1
121.498	6.2976	1
8.576	0	1
59.2384	2.5856	1
101.299	4.9408	1
107.29	5.0432	1
183.347	23.5008	1
69.2736	4.4544	1
72.7808	4.2496	1
110.694	5.76	1
49.024	5.6832	1
84.736	6.4	1
92.1344	7.1936	1
97.5104	6.0928	1
86.9632	3.9424	1
63.8464	2.8416	1
110.08	5.0176	1
130.509	12.8256	1
121.37	12.672	1
164.454	14.2336	1
81.5616	6.6048	1
151.501	9.9072	1
70.8608	1.664	1
167.014	13.4912	1
71.5008	4.6336	1
4.608	0	1
107.827	9.7792	1
142.694	19.4304	1
57.4976	4.3008	1
161.69	14.336	1
3.9936	0	1
89.856	6.784	1
89.4208	5.0688	1
158.694	16.896	1
153.626	14.848	1
63.9744	5.0688	1
3.1232	0	1
46.3872	2.7136	1
5.1712	0	1
46.4384	1.3824	1
102.144	7.9616	1
68.5824	5.8368	1
28.0064	3.712	1
84.1472	4.5056	1
87.6032	7.6288	1
100.864	4.7104	1
106.061	5.6064	1
206.541	26.4192	1
95.744	8.6272	1
75.2384	5.7856	1
42.88	1.5616	1
208.026	15.872	1
139.366	9.5744	1
81.4848	4.4288	1
73.0368	4.48	1
85.4528	5.3248	1
57.728	4.6848	1
95.5904	8.6528	1
3.072	0	1
67.8912	4.1472	1
107.904	8.5248	1
98.5856	8.0128	1
76.7232	5.12	1
65.7408	6.9376	1
88.6016	7.0912	1
203.75	13.8496	1
127.181	9.3696	1
82.6624	4.8128	1
44.6464	1.7408	1
47.9488	1.3312	1
31.8976	3.0976	1
70.8352	5.5808	1
83.6608	8.4224	1
64.5376	4.7872	1
75.904	5.5296	1
76.0576	3.6352	1
79.5392	3.8656	1
406.246	47.8208	1
105.446	5.0432	1
80.6144	1.5872	1
197.12	18.9952	1
220.621	22.016	1
127.872	12.4672	1
88.4992	6.6048	1
321.331	30.3616	1
3.7376	0.6912	1
4.48	0	1
103.706	6.4768	1
107.136	7.552	1
56.96	4.0192	1
67.2512	5.9648	1
107.674	8.2176	1
9.216	0.9472	1
446.285	38.7584	1
51.712	2.4576	1
78.08	5.9648	1
113.51	2.0224	1
67.1744	5.6064	1
161.946	9.4208	1
79.104	7.0912	1
76.928	4.1728	1
84.9152	8.3456	1
88.0128	5.9392	1
341.299	25.9328	1
65.8688	3.9168	1
69.632	4.0448	1
73.8304	3.2	1
116.019	7.5008	1
247.142	21.0432	1
84.9664	5.4016	1
109.85	7.7568	1
118.426	6.5536	1
5.4272	0	1
10.0352	0	1
81.4336	5.9904	1
5.9904	0	1
214.758	14.8992	1
178.202	15.7184	1
143.437	10.0864	1
71.2448	4.4288	1
96.6656	5.0432	1
3.0976	0	1
118.195	8.4224	1
183.04	12.928	1
61.2352	2.8672	1
71.0912	4.1728	1
111.667	9.728	1
110.259	8.4992	1
62.6688	2.8416	1
93.9776	5.8368	1
88.6528	4.3008	1
122.214	11.8528	1
71.3984	6.0672	1
13.184	2.4064	1
117.555	5.376	1
70.6816	2.8672	1
102.554	10.5216	1
96.6144	6.7328	1
112.307	6.9632	1
100.403	5.4272	1
119.424	11.6736	1
8.6016	1.536	1
123.776	8.7552	1
122.24	5.7088	1
44.8256	2.6624	1
84.2752	3.8144	1
70.528	3.1232	1
39.6032	5.6064	1
75.4432	5.2224	1
310.886	19.7376	1
2.8928	1.408	1
61.6192	5.7088	1
129.587	7.6544	1
85.0176	4.4288	1
928.973	72.1664	1
99.5584	1.2032	1
106.01	5.2736	1
188.109	12.7744	1
462.797	39.04	1
130.739	5.632	1
124.006	6.0416	1
81.8176	4.6848	1
63.0784	3.328	1
112.563	6.9632	1
94.6944	6.272	1
3.84	0	1
459.827	25.0624	1
82.9952	8.7808	1
84.224	4.5312	1
94.72	3.8144	1
11.904	1.28	1
86.2464	4.3264	1
241.28	24.96	1
118.835	10.0864	1
8.6272	0	1
2136.91	91.2128	1
179.661	5.2992	1
76.4672	4.5824	1
107.494	7.7824	1
56.704	2.4576	1
80.1024	5.8112	1
92.2624	7.552	1
74.6496	4.5824	1
211.686	14.2336	1
224.307	15.1296	1
96.512	1.408	1
164.454	10.5472	1
98.4576	5.6064	1
61.7728	3.8912	1
98.176	8.5504	1
94.5152	12.9024	1
194.381	22.9632	1
135.706	7.0912	1
135.501	7.424	1
121.626	4.0704	1
461.44	24.832	1
95.5136	9.5232	1
692.557	41.088	1
118.938	10.3168	1
1218.43	95.8464	1
76.3392	3.1744	1
68.2752	3.712	1
72.9344	3.5584	1
233.242	10.5984	1
71.0912	3.584	1
79.1552	4.5056	1
17.3568	1.664	1
4.2496	0	1
191.002	10.7264	1
217.139	14.5664	1
23.0144	4.7616	1
171.443	14.6176	1
63.3856	2.5088	1
65.7664	2.7904	1
68.3264	3.6608	1
93.4912	5.12	1
160.998	7.3472	1
58.752	0	1
96.64	12.9792	1
90.9312	2.5856	1
92.928	5.4528	1
200.653	13.8752	1
51.9168	1.4848	1
135.782	10.0096	1
262.81	13.7728	1
123.29	6.6816	1
89.0624	4.7616	1
94.7968	6.144	1
55.936	2.5856	1
143.872	16.9728	1
379.802	22.4512	1
77.2864	2.9696	1
243.251	30.2336	1
305.536	25.6768	1
177.51	11.392	1
71.8336	5.76	1
78.8992	6.4256	1
43.3408	2.0736	1
47.4368	3.8912	1
147.635	8.8832	1
110.541	11.2384	1
187.11	19.3792	1
34.2528	1.6896	1
134.938	11.6992	1
10.112	0.6144	1
84.096	4.5312	1
79.6928	6.6048	1
60.7488	4.1728	1
99.0976	7.1424	1
10.9312	0.9728	1
106.906	3.2512	1
163.584	13.056	1
303.642	20.1984	1
75.9296	4.7104	1
66.0736	3.6864	1
65.0496	3.2256	1
154.854	13.9264	1
127.002	10.2912	1
113.664	6.5024	1
87.7056	3.3536	1
64.8192	2.944	1
255.181	14.6688	1
460.39	27.8272	1
103.731	3.4048	1
80.768	3.6608	1
227.942	10.0352	1
482.099	34.0736	1
175.539	4.3776	1
74.5728	4.2496	1
53.0944	6.4768	1
48.512	1.408	1
52.5824	1.1776	1
106.496	8.0384	1
10.4448	1.2288	1
204.16	17.9456	1
151.808	9.216	1
83.328	5.2224	1
132.096	7.1168	1
46.72	1.8944	1
127.59	8.3456	1
78.9248	3.7888	1
87.1936	5.76	1
66.9696	1.8432	1
91.5456	5.9648	1
80.4864	5.1968	1
71.0912	4.8128	1
212.25	11.9296	1
178.509	15.8208	1
111.283	10.0352	1
78.464	4.5568	1
40.6016	2.1248	1
78.2592	3.0208	1
80	6.6048	1
96.3584	4.992	1
92.672	6.3488	1
59.648	2.8416	1
97.5872	6.3488	1
263.859	19.3024	1
75.9808	3.7888	1
123.443	12.5184	1
110.285	6.784	1
103.373	8.6528	1
238.285	22.4	1
157.491	15.5648	1
3.8656	0	1
45.9008	3.8656	1
126.182	6.2976	1
126.157	4.6336	1
187.238	14.1312	1
96.6656	5.3248	1
93.7216	5.2992	1
124.646	7.6544	1
60.288	3.5584	1
108.774	6.4256	1
26.6752	3.8912	1
159.232	8.448	1
3.4816	0	1
167.962	14.4896	1
77.4656	3.9424	1
51.328	7.2448	1
63.0272	3.2	1
168.064	11.2384	1
220.979	13.2864	1
222.515	12.0064	1
113.715	5.2736	1
155.264	13.7728	1
45.184	4.8128	1
71.3728	1.7152	1
70.1696	2.6368	1
239.744	20.0192	1
67.328	3.8656	1
411.034	16.8704	1
81.6384	7.3984	1
117.402	5.6064	1
130.406	5.9648	1
115.251	13.7216	1
58.112	2.304	1
76.4928	4.1728	1
77.5168	4.736	1
100.429	8.0128	1
86.3488	5.632	1
102.605	9.472	1
151.245	15.872	1
225.434	16.4608	1
145.715	13.44	1
335.002	24.8832	1
739.507	67.6352	1
87.0656	3.8912	1
96.8704	5.1712	1
146.739	9.1904	1
127.232	6.6048	1
118.605	7.3216	1
212.147	10.4448	1
101.99	8.448	1
78.336	1.408	1
84.6336	6.0672	1
341.043	40.8064	1
73.984	5.3504	1
123.11	5.376	1
165.504	9.9328	1
43.9808	2.5088	1
83.5072	6.2976	1
249.395	23.7568	1
62.3616	2.4576	1
124.57	10.2144	1
137.728	9.6256	1
57.2672	3.456	1
90.8032	5.4528	1
51.968	1.9456	1
92.4928	5.0944	1
28.2624	1.9712	1
135.706	10.2656	1
170.675	14.0544	1
112.026	8.2688	1
3768.24	358.272	1
81.3312	2.5088	1
191.334	10.624	1
133.786	10.1888	1
79.9744	3.968	1
98.3296	3.9168	1
208.205	16.3584	1
14.0288	0.9984	1
63.872	2.5856	1
110.464	8.2432	1
107.571	6.9632	1
96.256	5.632	1
8.4736	1.792	1
116.147	8.4736	1
52.9152	1.7664	1
61.6448	2.7392	1
89.1136	6.3488	1
126.669	9.6256	1
278.272	19.6096	1
50.3808	4.2752	1
3.7888	0	1
79.6672	4.0704	1
140.954	9.3952	1
101.76	5.248	1
345.011	39.6032	1
121.651	8.9856	1
121.114	10.1888	1
132.992	9.9072	1
205.21	18.7648	1
3.2512	0	1
106.445	9.088	1
344.32	34.1504	1
75.6736	3.328	1
66.8928	4.1728	1
678.118	79.9744	1
77.4912	4.8128	1
5.4784	0	1
319.642	29.9776	1
100.71	6.3744	1
137.242	11.3408	1
102.554	3.456	1
62.6432	3.2512	1
86.7328	4.992	1
108.518	6.1952	1
100.838	11.0848	1
115.072	5.3248	1
72.9344	2.8416	1
36.6592	1.8176	1
87.168	3.7888	1
127.898	6.528	1
139.546	11.008	1
62.2336	3.0208	1
223.386	19.3536	1
246.938	41.856	1
189.517	12.3648	1
301.03	19.0976	1
99.2512	9.8048	1
192.589	17.7152	1
105.088	8.832	1
113.434	10.1632	1
54.3488	1.4336	1
89.1136	4.9664	1
174.234	10.4704	1
78.3104	3.84	1
94.2336	6.4512	1
134.938	6.6048	1
171.264	22.3744	1
111.514	8.3968	1
257.664	28.6208	1
252.621	25.2416	1
177.971	15.2576	1
133.222	13.312	1
25.216	4.3008	1
168.218	12.3648	1
86.0672	7.7056	1
140.851	4.9408	1
106.189	9.1136	1
154.496	17.3056	1
77.8496	1.2032	1
66.6624	5.5296	1
106.368	5.2736	1
100.813	6.4256	1
109.286	14.7712	1
85.4272	7.4496	1
15.1296	3.3536	1
555.085	58.7776	1
50.9952	3.4048	1
100.352	5.4528	1
76.3136	5.6832	1
59.0592	3.7632	1
52.1984	2.6112	1
7.8592	1.8944	1
94.6688	5.888	1
348.032	37.8624	1
97.2288	5.6832	1
14.5664	1.8432	1
58.7008	1.408	1
120.422	9.9328	1
69.6064	4.9664	1
54.528	2.6112	1
934.349	59.2384	1
116.941	6.3744	1
104.243	7.1936	1
105.267	11.648	1
118.528	11.8272	1
141.517	8.2944	1
63.0528	3.5072	1
74.752	7.5008	1
144.742	15.5136	1
160.128	5.7344	1
4.9152	0	1
109.44	7.0656	1
140.723	10.7008	1
100.198	6.784	1
92.0576	8.1152	1
120.73	6.6816	1
13.056	1.9968	1
179.174	12.544	1
205.107	19.4816	1
111.411	10.1632	1
248.166	17.1264	1
29.0048	2.1248	1
117.581	9.0368	1
281.19	18.944	1
36.5056	1.4848	1
180.301	31.0528	1
110.95	4.8384	1
1746	129.382	1
82.2528	6.1696	1
50.816	0	1
53.0944	2.0736	1
170.112	9.4464	1
67.328	2.8416	1
188.544	9.8048	1
86.0672	2.7648	1
104.73	7.7312	1
146.099	6.0672	1
124.723	4.9152	1
5.7344	0.9216	1
48.9472	2.8928	1
117.837	7.1936	1
326.758	20.224	1
112.256	5.5296	1
445.645	49.8944	1
73.1136	5.6576	1
141.286	9.1648	1
79.2832	8.6528	1
198.579	18.304	1
89.5744	6.7072	1
222.387	16.6912	1
267.264	17.0752	1
129.869	9.7792	1
266.368	16.384	1
239.667	21.0944	1
63.4112	3.7632	1
91.4688	10.2912	1
73.728	4.8128	1
307.866	27.4432	1
88.9344	5.4016	1
102.4	8.192	1
107.93	9.2928	1
129.869	4.736	1
158.08	13.056	1
79.1808	10.4704	1
74.6752	4.0448	1
3.328	0	1
188.237	16.1024	1
180.301	12.672	1
9.1904	0	1
123.034	9.984	1
152.397	12.416	1
61.7984	1.664	1
56.448	2.2528	1
107.034	8.5248	1
42.3424	2.7904	1
310.912	20.352	1
181.939	10.496	1
500.941	66.1504	1
79.5392	6.272	1
123.904	8.2944	1
78.1312	2.2528	1
1828.45	209.664	1
67.3024	7.168	1
205.824	19.2512	1
50.5856	2.3552	1
21.4784	0.9216	1
104.166	4.352	1
168.986	5.4528	1
129.024	7.8592	1
140.083	10.1888	1
91.4688	7.4496	1
147.584	10.9824	1
232.243	14.6432	1
82.2528	4.224	1
103.322	9.344	1
58.0096	7.1424	1
4.0192	0	1
13.5936	0	1
138.163	12.7488	1
76.4672	2.4064	1
28.2624	4.2752	1
88.5504	6.4512	1
109.491	12.4928	1
92.1088	8.7808	1
86.6304	4.4032	1
164.096	12.5696	1
88.32	5.9136	1
27.2384	2.2272	1
300.134	28.0064	1
74.5216	5.504	1
312.806	22.656	1
50.5344	2.304	1
121.549	5.6064	1
158.746	9.1904	1
59.2896	6.9632	1
170.394	19.0464	1
68.4288	7.1424	1
73.1904	3.3536	1
90.0352	7.1424	1
83.328	4.352	1
3.3024	0	1
107.034	10.112	1
90.3168	7.6288	1
59.3664	2.56	1
71.68	4.4288	1
62.4128	4.736	1
16.9728	3.1744	1
344.602	35.5584	1
844.646	97.6896	1
6.4512	0	1
239.718	23.3216	1
102.81	5.9392	1
67.7632	4.1472	1
82.56	6.9888	1
362.01	35.5328	1
115.302	9.216	1
58.0352	4.4544	1
52.096	2.432	1
173.952	12.3904	1
1717.2	154.342	1
96.0768	4.7616	1
126.106	7.68	1
55.168	4.2496	1
189.926	12.0832	1
191.078	8.7296	1
2031.31	166.989	1
94.336	6.8352	1
3.3024	0	1
59.3408	2.304	1
132.557	10.112	1
85.1968	4.5312	1
302.899	25.216	1
95.6416	5.4528	1
66.2016	3.7376	1
86.912	4.992	1
96.8704	8.5248	1
78.5664	5.9904	1
78.5152	6.144	1
100.326	7.5776	1
65.408	5.7088	1
215.808	34.7136	1
55.808	2.4832	1
94.5152	6.8864	1
73.088	4.6592	1
67.1488	5.9136	1
147.123	13.1328	1
165.453	9.1392	1
100.685	10.9056	1
32.4864	6.016	1
129.792	9.8304	1
345.139	25.1136	1
6.3232	0	1
81.0496	5.888	1
81.8176	5.888	1
190.131	12.3648	1
136.781	6.7328	1
61.3888	1.8944	1
82.2272	6.9376	1
130.432	8.0128	1
78.3104	5.0432	1
302.234	25.0624	1
290.739	21.2992	1
123.827	7.296	1
28.2368	3.2	1
103.014	7.1424	1
105.933	5.5808	1
480.922	42.3424	1
6.8352	1.92	1
107.29	6.016	1
69.3504	3.8656	1
252.16	27.6224	1
80.128	5.9392	1
10.0096	1.7664	1
54.6816	3.0464	1
130.202	11.904	1
131.738	12.416	1
65.6896	3.2256	1
83.712	7.0144	1
167.501	14.5408	1
96.384	3.5328	1
70.0928	2.7648	1
50.304	2.5344	1
219.136	25.344	1
52.2496	7.3472	1
99.6352	9.8048	1
73.344	3.7888	1
7.6544	0	1
93.4912	6.9376	1
52.7616	3.5072	1
157.03	12.3904	1
66.8416	5.1712	1
124.083	8.704	1
63.488	3.4048	1
98.5856	8.0128	1
112.256	11.0336	1
180.582	14.464	1
190.208	14.1568	1
4.8384	0	1
62.9504	3.1744	1
84.8384	9.5232	1
52.4032	3.0208	1
90.0096	4.0192	1
68.8128	4.1216	1
99.3024	11.392	1
123.597	12.2112	1
226.022	21.9136	1
100.07	7.1168	1
130.33	9.728	1
115.123	8.7552	1
109.798	8.064	1
119.219	10.9056	1
66.9696	3.712	1
76.1088	3.7376	1
80.768	9.2928	1
101.478	4.48	1
45.44	2.6368	1
145.408	14.0032	1
65.5872	3.3536	1
268.877	18.5856	1
201.702	16.64	1
34.816	1.4592	1
14.208	1.9968	1
110.208	2.7904	1
132.787	14.3616	1
76.8	4.864	1
64.1536	2.6624	1
180.07	5.632	1
114.739	7.936	1
163.2	3.2256	1
192.461	13.7472	1
92.1344	9.2672	1
180.122	19.1744	1
104.474	6.0928	1
126.387	7.7824	1
200.397	12.5696	1
162.688	12.2624	1
66.56	2.2272	1
120.499	11.7248	1
98.6624	9.088	1
49.0752	3.9168	1
62.976	4.5312	1
101.939	5.2992	1
106.035	5.5808	1
135.885	14.3872	1
172.954	17.9456	1
116.89	11.52	1
76.3904	8.6784	1
162.278	14.1824	1
3.584	0	1
71.808	3.3024	1
77.0304	0.5376	1
72.2432	5.76	1
103.603	3.7376	1
349.005	37.0944	1
152.883	10.1632	1
106.061	9.1136	1
221.338	24.0128	1
93.2864	6.0416	1
307.866	31.7184	1
131.558	7.6288	1
210.432	19.3792	1
141.696	11.6736	1
138.47	8.9344	1
92.544	5.8624	1
211.456	20.5824	1
105.779	9.216	1
64.6912	3.5328	1
66.3296	7.0656	1
324.813	37.0176	1
218.061	13.952	1
327.603	30.464	1
70.4	3.9168	1
3.1232	0	1
4.5568	0	1
113.382	6.3488	1
188.979	16.4352	1
102.758	9.6	1
121.574	7.04	1
76.3392	5.4528	1
161.459	17.3824	1
39.296	3.2512	1
202.547	28.3648	1
65.152	8.1408	1
140.134	11.136	1
288.896	24.7808	1
137.344	17.152	1
109.389	7.3216	1
113.126	13.0816	1
82.2016	6.4256	1
116.352	8.6016	1
142.643	7.936	1
257.664	25.3184	1
142.976	11.9808	1
57.2672	3.8144	1
196.89	23.0912	1
110.31	8.1408	1
99.1744	12.9536	1
244.378	17.6896	1
7.9616	2.2528	1
127.104	6.656	1
82.8928	3.584	1
79.3856	4.8128	1
175.744	8.4992	1
89.7024	1.8432	1
224.973	23.424	1
290.33	24.192	1
73.3952	4.4288	1
104.243	1.92	1
57.472	2.688	1
58.0608	7.552	1
95.36	5.2992	1
73.1136	4.608	1
148.557	12.0832	1
174.618	20.2496	1
82.6624	7.7312	1
35.9936	0.768	1
76.8768	3.9168	1
117.018	11.648	1
18.4576	0.896	1
1344.79	96	1
121.498	4.1216	1
126.899	10.2144	1
236.416	20.9664	1
133.274	8.3712	1
92.8256	5.0688	1
99.2256	6.1952	1
111.002	13.4912	1
125.21	9.8816	1
81.3568	5.5808	1
120.806	13.2608	1
5.12	0	1
204.16	16.64	1
133.171	6.5536	1
88.7808	7.6288	1
103.731	8.9088	1
258.842	21.7344	1
172.928	17.1776	1
95.104	6.5536	1
99.4304	7.2704	1
136.422	12.3136	1
106.547	4.9664	1
85.7856	6.6048	1
376.627	30.6688	1
177.306	7.1936	1
47.1552	2.5344	1
280.602	26.9312	1
286.413	34.0224	1
139.75	8.2432	1
81.536	5.6576	1
2.7392	0	1
145.894	10.0352	1
67.0976	2.048	1
89.3952	1.3568	1
84.1472	5.0432	1
106.675	5.9648	1
81.2032	5.1712	1
109.107	0.2304	1
80.256	4.0192	1
18.2272	1.792	1
232.755	21.8624	1
88.2432	4.9408	1
7.6032	0.8448	1
57.088	3.3536	1
337.126	33.2288	1
164.608	13.8496	1
218.803	24.3456	1
140.928	10.3936	1
72.1152	4.0704	1
81.3568	4.9152	1
108.621	7.5776	1
133.248	13.6704	1
72.2688	4.5312	1
152.602	12.544	1
102.298	7.1168	1
90.3424	7.1936	1
66.5856	6.4	1
100.429	7.9872	1
117.018	13.952	1
98.7904	9.5488	1
155.955	8.8064	1
746.342	40.7552	1
79.104	6.7584	1
229.837	22.5792	1
225.766	19.1232	1
92.1088	10.0864	1
89.6512	0.3584	1
163.098	22.3488	1
100.966	7.7824	1
50.816	2.6112	1
66.8672	4.5568	1
7.6288	0	1
66.9952	2.5344	1
22.5024	0	1
48.9472	3.456	1
226.97	19.4048	1
29.5936	2.0224	1
59.8272	3.712	1
79.5392	6.7584	1
73.6512	6.144	1
533.376	47.5136	1
124.672	9.7536	1
101.299	7.1936	1
125.184	11.3408	1
85.4784	3.8912	1
58.5984	2.304	1
1384.78	106.522	1
117.965	7.168	1
137.267	6.4768	1
121.754	7.6032	1
68.992	2.9184	1
329.011	18.432	1
150.989	12.3392	1
119.296	8.5504	1
137.114	7.9104	1
101.069	8.0128	1
86.8096	6.016	1
347.904	23.9104	1
233.344	25.9072	1
179.738	9.6512	1
77.9008	6.0672	1
63.8464	18.6368	1
3.3024	0.1024	1
249.6	21.9648	1
95.2064	4.5312	1
189.926	16.8448	1
94.1568	6.0416	1
314.112	24.4992	1
166.81	10.112	1
[truncated: 20,761 more rows]

## Sheet: Fig 5 Supp 1A raw beads
droplet_area	cell_area	repeat
77.4912	48.256	1
27.52	13.9264	1
455.552	77.1072	1
24.32	12.7232	1
124.621	65.6128	1
63.7696	36.8128	1
3.6096	0.128	1
213.683	43.9552	1
93.7216	50.9952	1
47.7184	26.5728	1
44.8768	22.7328	1
37.376	20.0192	1
33.2544	17.0496	1
27.4944	13.056	1
80.0512	45.7472	1
26.0096	13.4912	1
55.1936	27.0336	1
50.8928	24.32	1
156.467	78.3104	1
56.1408	30.6432	1
38.1184	20.48	1
28.16	12.8512	1
26.8288	14.1568	1
73.7536	43.3152	1
27.648	13.4912	1
114.611	64.2304	1
33.3824	16.8192	1
31.0784	14.976	1
117.325	67.0464	1
94.976	54.1184	1
22.0928	9.9584	1
116.07	54.272	1
32.3584	14.4896	1
217.958	115.456	1
27.1872	12.3648	1
49.3824	27.648	1
247.578	44.2624	1
58.1376	33.8176	1
85.6064	51.5584	1
26.8288	11.4944	1
76.1856	40.7808	1
36.1472	19.8912	1
28.7488	14.1568	1
45.6448	22.8608	1
58.7776	32.128	1
39.1424	20.2752	1
46.72	24.448	1
46.848	27.1104	1
73.728	42.1632	1
20.0704	8.0384	1
33.9712	18.2016	1
53.7344	29.824	1
88.9344	49.7664	1
38.3744	20.9152	1
99.7376	48.7424	1
76.416	43.6224	1
110.31	55.5776	1
93.4912	53.4784	1
128.768	67.3792	1
36.9664	19.9424	1
29.7472	13.9264	1
36.3008	18.048	1
104.09	60.2368	1
65.28	36.4288	1
42.9056	21.888	1
37.2736	20.096	1
23.8336	13.312	1
113.075	58.5216	1
36.9408	20.1728	1
249.242	64.6144	1
39.5008	19.7632	1
33.408	16.64	1
110.925	62.5664	1
31.0016	14.4896	1
46.464	23.808	1
79.3344	39.5264	1
34.4064	15.9744	1
51.2256	25.6	1
81.2544	43.4944	1
42.1632	21.6832	1
34.5856	17.7152	1
37.1456	18.4832	1
52.608	29.0816	1
33.0496	16	1
44.5952	25.5488	1
118.938	60.6208	1
23.936	10.7776	1
28.5952	14.592	1
60.6464	33.0752	1
35.6864	18.3808	1
36.096	16.2816	1
26.2912	13.1328	1
45.2096	22.1184	1
96.3328	57.344	1
34.7136	18.5856	1
48.6656	25.6256	1
48.8448	25.6256	1
59.6992	33.5872	1
55.2448	27.2384	1
74.2912	35.968	1
52.2752	28.3392	1
157.491	86.9888	1
23.8336	11.136	1
38.1184	18.4832	1
45.824	22.0928	1
26.1888	13.3888	1
50.7136	25.984	1
107.418	54.1952	1
116.966	71.6544	1
336.538	151.731	1
19.4304	8.0896	1
16.7936	7.7824	1
30.9248	14.7456	1
25.9328	10.9056	1
66.9696	33.6896	1
56.2432	32.4864	1
54.272	34.4064	1
60.0832	32	1
104.218	57.1392	1
40.0128	21.632	1
26.2912	12.288	1
48.3584	24.2176	1
77.7472	43.52	1
48.256	27.4176	1
92.672	48.2304	1
72.5248	29.8496	1
60.672	31.616	1
29.44	13.9264	1
41.9072	21.0432	1
35.5328	17.7152	1
33.3056	16.1792	1
42.112	22.3744	1
45.1584	24.0384	1
37.0432	18.8928	1
40.1664	18.6368	1
21.7344	9.6768	1
33.1264	15.0528	1
26.752	12.1856	1
34.048	16.4096	1
21.504	10.2656	1
65.2032	34.5856	1
48.768	27.6736	1
107.238	56.9856	1
47.0784	26.3936	1
56.2176	29.2352	1
34.9696	17.3056	1
51.6352	26.5216	1
31.616	15.7696	1
69.1456	34.4576	1
207.77	105.882	1
40.9856	21.4784	1
35.8656	17.28	1
77.952	43.904	1
50.3808	25.6	1
91.1104	45.952	1
45.2608	22.4	1
88.7296	43.7504	1
50.9184	26.1376	1
44.2624	21.6064	1
25.0112	12.3904	1
24.576	12.1856	1
97.536	54.4	1
71.4496	40.6016	1
51.2768	26.3424	1
35.2512	17.7152	1
39.8336	20.2752	1
56.448	29.7984	1
85.6576	43.8272	1
92.032	44.9792	1
64.9728	33.6896	1
40.0384	18.3296	1
105.702	54.4	1
63.3088	33.2032	1
44.8512	23.5776	1
29.2608	15.0528	1
32.0256	16.0512	1
37.9904	19.7888	1
34.688	18.9952	1
355.123	197.325	1
57.3952	31.1808	1
38.784	19.968	1
76.032	39.6544	1
50.9696	25.472	1
44.6976	21.4528	1
26.496	11.776	1
16.0768	5.4272	1
60.288	30.336	1
89.9584	46.08	1
43.4432	21.3504	1
70.3232	37.2992	1
34.5856	18.3808	1
64.4096	37.7856	1
52.3776	27.9808	1
105.114	49.408	1
32.4608	15.7184	1
48.9216	23.68	1
33.3312	16.7168	1
43.7504	23.5776	1
33.408	16.384	1
68.7104	35.328	1
50.1248	24.9856	1
88.32	50.2784	1
71.936	36.9664	1
148.224	66.7136	1
45.2352	26.1888	1
25.9584	13.2864	1
69.2736	39.5008	1
30.72	15.8976	1
67.3536	36.5824	1
41.4464	21.0432	1
60.6976	32.0768	1
29.1584	14.3104	1
75.0848	35.5584	1
122.035	56.6272	1
32.6656	16.3328	1
32.512	16.512	1
259.994	77.9264	1
98.9952	48.9216	1
59.8272	32.7168	1
40.1664	21.6832	1
66.1504	34.4064	1
142.285	63.7184	1
23.2192	11.2896	1
59.5968	31.7184	1
84.1216	42.4192	1
36.9408	17.3568	1
99.8144	52.6336	1
74.7008	36.6848	1
47.232	24.8576	1
54.016	27.4944	1
26.6752	13.0048	1
27.0592	13.056	1
72.9856	38.5792	1
58.0608	31.6672	1
46.6688	26.4448	1
66.7392	36.0704	1
37.1968	19.8144	1
29.2352	14.336	1
370.202	175.258	1
23.8592	12.2624	1
33.3568	17.5104	1
26.0352	13.0304	1
38.656	20.6336	1
39.0656	20.736	1
49.1264	26.4192	1
44.7232	24.8064	1
69.1456	34.7904	1
38.784	19.0208	1
57.0624	32.7168	1
212.966	115.251	1
33.9456	18.1248	1
44.0832	25.984	1
56.832	32.2304	1
59.52	33.152	1
135.936	70.1184	1
10.6496	1.1264	1
48.896	23.8592	1
26.1632	12.9536	1
60.5696	33.28	1
77.2608	40.704	1
25.6256	13.0816	1
24.32	11.0592	1
133.53	75.4176	1
34.56	17.0496	1
32.8192	17.4848	1
112.205	52.1728	1
39.9104	21.5552	1
73.0368	40.7296	1
249.754	135.501	1
44.1856	21.6832	1
27.3152	14.08	1
169.139	96.8448	1
35.9424	18.5088	1
137.651	71.6544	1
75.2384	36.864	1
35.0208	18.1504	1
192.41	48.9728	1
103.117	54.528	1
40.576	21.9136	1
70.4512	39.168	1
29.4912	14.2336	1
24.6272	11.8528	1
58.1632	32.2816	1
77.5936	39.6032	1
25.9584	13.1072	1
44.7488	24.8832	1
36.8128	20.5568	1
78.4896	45.1072	1
37.248	19.6096	1
81.6128	46.1056	1
33.7408	19.072	1
44.5696	24.0896	1
119.45	66.7904	1
27.3664	14.08	1
59.5712	31.2064	1
36.2496	18.0224	1
478.438	89.984	1
50.4064	25.8048	1
68.8128	41.0112	1
104.576	56.4224	1
37.6064	20.5824	1
67.1488	36.5568	1
26.3424	14.08	1
16.3072	7.4496	1
63.744	32.5376	1
96.9728	51.8144	1
32.6912	18.3296	1
26.2912	12.6464	1
158.541	79.1296	1
1893.32	136.294	1
270.976	55.8592	1
38.2976	20.4032	1
42.0352	22.4256	1
34.56	16.0512	1
34.7392	17.3056	1
38.9632	19.072	1
92.5184	45.3376	1
86.8096	49.4336	1
37.7856	19.5584	1
46.4384	24.7552	1
307.866	56.3456	1
106.266	57.1392	1
39.68	21.5552	1
100.096	48.7936	1
35.0976	18.7136	1
8.1664	0.8448	1
21.5552	10.9824	1
124.288	56.4736	1
56.832	24.7296	1
114.099	55.8336	1
41.1392	21.248	1
53.3248	28.3648	1
16.7168	6.7072	1
23.5264	11.0592	1
36.0192	19.9424	1
100.198	47.5136	1
109.414	57.1136	1
32.3584	16.9472	1
40.2944	18.6368	1
36.1728	18.1248	1
33.5104	15.3856	1
379.853	51.456	1
23.04	9.7024	1
24.96	13.7472	1
58.88	29.7216	1
86.8096	49.2544	1
36.8384	17.5616	1
48.7168	25.6768	1
39.7312	19.3024	1
79.8464	38.6048	1
23.5008	11.1104	1
47.4112	24.0896	1
26.752	14.1312	1
38.5792	20.4544	1
39.1936	18.5856	1
53.5552	29.2352	1
91.5968	49.536	1
61.696	36.0192	1
28.4928	15.36	1
106.035	55.5776	1
26.9568	6.1184	1
31.1808	14.3616	1
20.5312	9.7024	1
44.8	21.4784	1
98.56	54.8096	1
59.2128	33.024	1
41.0112	19.712	1
49.5872	27.7504	1
99.1488	54.3232	1
46.5152	22.784	1
65.2544	35.584	1
91.1104	45.4656	1
34.3552	16.6656	1
25.0624	11.904	1
21.5552	11.2128	1
31.6672	15.3344	1
44.1344	25.2416	1
63.0528	31.872	1
111.437	59.2384	1
70.8352	34.9184	1
54.2208	30.5408	1
21.5808	9.0368	1
32.64	15.2576	1
83.9168	47.616	1
28.7744	13.2352	1
183.629	59.3408	1
101.376	48.6656	1
32.7936	17.1264	1
10.5216	3.5584	1
99.3024	43.0848	1
32.9984	18.9952	1
32.512	16.6144	1
50.8416	25.3696	1
35.5584	19.9424	1
38.784	19.6864	1
145.075	66.3552	1
78.4896	42.8544	1
75.2128	39.8336	1
212.454	104.96	1
23.5264	10.3936	1
23.552	7.7568	1
48.4608	24.6272	1
42.1888	19.1232	1
32.1024	15.616	1
80.9728	36.5312	1
26.624	13.0816	1
48.9728	26.8032	1
24.7808	13.44	1
59.52	32.896	1
44.9024	25.0112	1
55.4752	27.9808	1
42.4448	23.296	1
26.1376	13.5424	1
53.8624	31.4624	1
22.8864	11.2128	1
36.736	19.2256	1
25.7536	12.5952	1
35.3792	18.9184	1
94.8224	49.2288	1
77.5936	39.04	1
27.648	13.8752	1
39.168	19.0976	1
77.7728	43.2128	1
66.2016	36.4032	1
37.1456	18.8672	1
49.5616	24.7808	1
62.5664	32.3584	1
35.8144	20.0448	1
34.9952	19.7632	1
177.869	86.8608	1
103.04	58.7776	1
82.0992	45.0048	1
1755.52	165.043	1
30.1312	15.6416	1
50.2528	25.2672	1
27.1872	14.208	1
51.456	26.9056	1
26.2656	13.1584	1
32.2816	17.1008	1
27.0592	14.2848	1
23.3216	11.2128	1
34.6112	19.7888	1
24.6528	12.544	1
37.7344	17.8176	1
55.808	30.5408	1
98.048	52.8896	1
38.8096	18.7136	1
65.664	33.7152	1
35.0976	19.0208	1
34.7904	18.7136	1
83.7632	44.5696	1
27.2896	14.9248	1
49.0752	23.8592	1
77.8496	41.8816	1
143.693	62.72	1
34.7392	18.9696	1
103.757	57.4976	1
86.1696	38.5536	1
41.8048	23.5008	1
82.2272	43.1616	1
37.76	18.9952	1
35.2512	18.048	1
69.2736	37.504	1
33.9456	17.1264	1
182.17	101.53	1
33.8688	17.8944	1
81.2288	38.4256	1
35.9424	20.2496	1
29.0304	14.976	1
74.1376	34.2784	1
25.1136	11.3408	1
270.541	113.306	1
61.696	32.9472	1
22.4256	10.4192	1
66.1248	33.408	1
47.2832	25.344	1
38.8096	20.2752	1
105.472	57.7792	1
130.458	54.4256	1
58.9824	33.8176	1
70.528	34.0224	1
34.8928	19.712	1
22.6304	10.0096	1
58.2144	30.3104	1
101.683	48.7168	1
37.4784	20.9408	1
26.9568	12.9536	1
34.56	17.9712	1
136.755	68.4032	1
47.8464	27.392	1
567.424	108.134	1
33.5872	16.7168	1
380.621	112.64	1
92.8768	51.5584	1
689.152	121.114	1
64.8704	35.0976	1
190.029	98.9184	1
123.546	61.184	1
39.5008	21.9392	1
57.1392	31.3856	1
55.1936	31.2064	1
39.5008	22.5792	1
47.3088	27.136	1
113.664	55.4752	1
68.8384	35.1488	1
48.64	28.8768	1
42.3168	22.3232	1
86.4512	47.36	1
48.7936	25.9328	1
139.853	73.5488	1
40.832	21.2224	1
45.1584	23.296	1
146.355	77.4656	1
457.062	117.811	1
37.376	21.1968	1
37.7344	19.0208	1
34.7136	19.8656	1
290.688	33.1776	1
25.3696	12.0064	1
143.77	79.36	1
26.0352	12.5696	1
53.6064	31.488	1
66.2784	37.1712	1
33.28	17.1264	1
30.8992	14.4384	1
21.7856	11.264	1
115.661	58.1376	1
137.882	72.7808	1
493.261	87.9872	1
63.1808	34.4832	1
68.1216	33.3568	1
29.9008	15.6672	1
56.3456	32.256	1
46.0288	26.752	1
50.6112	26.2656	1
58.752	32.256	1
51.2256	26.8544	1
44.3904	24.4224	1
48.2304	27.8272	1
34.3296	18.432	1
38.8352	20.3264	1
51.0976	27.4944	1
39.5008	21.1712	1
24.6784	12.1344	1
80.3584	40.7296	1
128.563	67.5328	1
41.8304	22.656	1
35.968	19.4816	1
31.36	16.7168	1
85.2736	45.7216	1
53.7344	30.464	1
35.712	20.224	1
93.824	49.408	1
54.3744	30.336	1
39.4752	21.1968	1
70.5024	38.8352	1
738.509	90.5472	1
54.7584	32.2048	1
37.9648	22.4512	1
52.608	27.8784	1
34.9696	20.4032	1
116.019	60.0576	1
31.616	14.3872	1
161.613	85.0176	1
57.9584	33.28	1
81.92	43.9808	1
42.0096	24.6528	1
64.4352	35.328	1
55.0144	30.1056	1
115.661	66.432	1
65.664	34.944	1
56.2176	31.8976	1
37.6832	20.7872	1
30.8992	15.36	1
46.0288	24.832	1
43.2896	25.0112	1
51.9168	30.0288	1
37.12	19.6352	1
28.0832	14.0544	1
37.0176	20.5824	1
66.4576	38.7584	1
32.1536	17.0496	1
532.685	56.0896	1
71.5264	40.5248	1
287.539	134.272	1
113.331	68.1472	1
207.667	102.246	1
25.9328	12.5952	1
111.206	50.8416	1
36.2496	19.0464	1
23.296	11.3408	1
24.832	11.8272	1
174.285	87.3984	1
58.3168	33.6128	1
25.8816	13.4656	1
305.741	48.3584	1
93.0816	48.6912	1
36.6336	19.84	1
12.6464	5.4784	1
116.019	64.8704	1
37.376	21.248	1
34.432	19.0976	1
43.264	25.2928	1
156.826	87.3728	1
35.2	20.5824	1
37.1456	19.6352	1
177.69	103.731	1
28.1088	13.3376	1
38.8096	19.7376	1
101.146	60.6208	1
34.5088	18.9696	1
129.126	76.1856	1
41.7536	21.7856	1
143.309	80.7936	1
88.3968	51.6608	1
64.3072	35.5072	1
32.7424	17.28	1
269.85	134.144	1
23.552	12.3648	1
291.379	56.2432	1
45.0816	24.7296	1
63.6672	34.688	1
107.494	51.6352	1
78.1824	36.5312	1
55.0912	30.5408	1
24.9088	13.44	1
57.7024	31.4624	1
82.0224	47.4112	1
31.744	15.5648	1
37.4272	20.3776	1
71.424	43.0336	1
24.2944	12.9536	1
145.459	86.7072	1
34.7392	20.7872	1
85.6576	40.7552	1
393.267	64.6144	1
73.5232	43.1104	1
43.5712	25.344	1
262.989	131.302	1
29.4144	15.7184	1
68.9152	37.5296	1
62.6176	36.2752	1
43.2896	24.6784	1
42.9056	24.9344	1
100.096	60.0576	1
30.464	16.3072	1
26.2912	14.3104	1
44.4928	25.6768	1
35.4816	20.992	1
69.2992	39.8592	1
70.1952	35.6096	1
43.2128	25.1904	1
59.8272	32.4352	1
84.224	47.7184	1
46.7712	27.0336	1
42.7264	23.68	1
476.902	114.381	1
45.1584	26.24	1
31.8208	16.8704	1
35.7376	20.096	1
63.7696	36.8896	1
35.84	20.3264	1
41.6768	21.7088	1
33.3056	18.7392	1
727.706	100.659	1
81.5104	47.9232	1
36.8384	21.4016	1
72.704	32.8448	1
147.302	65.9456	1
28.544	15.0016	1
94.8736	54.1952	1
51.328	30.6944	1
70.2464	37.8368	1
44.7744	26.6752	1
182.118	84.0192	1
33.28	19.1744	1
48.9728	26.624	1
635.878	58.6752	1
99.0208	54.9632	1
50.7136	30.2848	1
80.384	46.848	1
55.2704	30.0544	1
43.6992	25.7792	1
54.144	32.6144	1
158.054	87.2448	1
46.9248	24.6528	1
44.2368	23.9616	1
44.9792	25.728	1
23.7568	12.6464	1
57.4976	32.7168	1
65.3568	38.7328	1
663.04	127.667	1
35.1744	21.2992	1
24.7808	14.1056	1
295.424	80.1792	1
589.978	122.778	1
37.3504	22.6304	1
44.672	25.1392	1
25.2928	13.4912	1
210.176	69.4016	1
48.1792	26.3936	1
46.208	24.8576	1
441.062	68.992	1
757.197	138.496	1
25.9072	13.568	1
45.8752	24.4992	1
117.862	64.1536	1
37.0432	21.3504	1
33.8432	20.3008	1
28.3136	15.4624	1
80.4864	37.12	1
197.376	99.7632	1
35.0464	19.2512	1
125.824	63.232	1
76.6208	38.2208	1
128.64	65.9968	1
185.37	107.162	1
37.5296	21.504	1
27.392	14.8224	1
114.406	56.8064	1
26.8544	13.3632	1
34.2272	17.0496	1
43.5456	26.24	1
73.344	43.9296	1
28.032	13.0816	1
50.6368	26.624	1
62.4128	36.6848	1
114.534	46.208	1
44.288	24.4736	1
68.5056	39.0656	1
94.7456	54.8352	1
45.1072	26.1376	1
137.37	68.0448	1
56.064	33.1776	1
163.866	84.5568	1
53.632	31.1808	1
53.1712	26.5728	1
34.7392	19.2256	1
105.165	52.5312	1
45.0816	26.0096	1
41.4208	25.9328	1
54.8096	32.0512	1
65.1008	36.7616	1
49.5616	23.0656	1
39.1168	21.6064	1
108.493	64.6912	1
55.0144	30.9504	1
79.5392	45.824	1
39.6544	19.9936	1
24.4224	12.2624	1
24.6016	13.952	1
33.8432	18.5856	1
101.888	57.5744	1
81.9968	49.3056	1
81.7152	44.2368	1
42.3424	25.3952	1
24.192	12.544	1
37.4272	20.5568	1
33.1776	19.712	1
98.816	48.5888	1
282.189	48.2816	1
26.0096	14.848	1
24.6016	12.7232	1
40.9088	23.0656	1
27.392	16.4096	1
47.616	26.8288	1
27.1872	15.5136	1
74.9056	36.3264	1
186.163	101.12	1
52.7104	28.9024	1
35.2512	19.9424	1
34.944	20.48	1
62.2592	36.224	1
149.043	72.2688	1
97.1008	47.0528	1
15.6416	7.808	1
44.8	26.2912	1
89.7792	51.7888	1
39.6032	20.1984	1
60.4928	29.184	1
50.9184	28.288	1
15.9232	8.7296	1
81.5872	37.888	1
37.4784	20.6336	1
53.9904	31.104	1
27.0848	15.1552	1
43.5968	26.5472	1
49.152	29.44	1
60.8	36.096	1
25.6768	14.2592	1
79.9232	50.048	1
33.28	16.3072	1
378.368	69.248	1
28.4928	16.4608	1
63.4624	36.352	1
47.4368	29.0048	1
119.475	59.1616	1
33.024	19.9936	1
33.9456	20.7872	1
37.1456	21.3504	1
108.16	45.4656	1
33.664	18.432	1
72.3456	43.0848	1
65.0752	33.1008	1
49.5104	26.3168	1
37.0176	21.9392	1
73.9072	45.0816	1
99.584	57.9584	1
37.7088	19.1232	1
34.2784	17.2544	1
133.35	67.6352	1
32.4096	16.9472	1
26.2144	9.3696	1
37.3504	21.4528	1
78.848	51.6864	1
60.544	37.376	1
38.016	22.8864	1
27.9552	14.1824	1
29.1584	19.8144	1
75.776	39.6288	1
58.8544	35.6096	1
40.2688	17.3568	1
101.53	49.152	1
32.7424	18.0224	1
80.4096	38.7584	1
43.52	22.6304	1
48.512	28.3392	1
42.4448	24.2688	1
33.3824	18.2272	1
148.608	68.4288	1
55.6288	29.2352	1
31.8976	18.7136	1
31.3088	18.8416	1
147.021	84.5568	1
45.824	25.984	1
40.8832	25.1648	1
70.656	29.2864	1
106.726	64.7936	1
134.118	70.528	1
43.7248	26.8032	1
22.3744	11.4688	1
57.7024	28.8512	1
24.3712	13.5936	1
82.2016	47.4112	1
115.738	65.4336	1
38.0416	21.2224	1
40.8832	20.0192	1
99.3536	56.576	1
63.8976	36.5568	1
33.4848	20.608	1
107.238	51.6352	1
140.058	74.8032	1
33.3312	20.1216	1
13.568	6.8096	1
24.5248	13.696	1
36.352	21.4016	1
25.1392	14.3104	1
50.2784	27.5712	1
40.4736	21.632	1
35.9936	21.0176	1
122.982	52.992	1
71.808	44.8512	1
22.9632	12.7744	1
61.6192	31.0784	1
119.552	61.184	1
68.5056	40.3456	1
25.5488	13.184	1
32.4608	18.7136	1
72.9344	45.1072	1
45.4656	23.168	1
34.2784	20.3008	1
24.832	12.288	1
71.6544	36.224	1
127.155	70.2976	1
48.2048	28.6464	1
52.6592	32.64	1
56.8576	32.1536	1
55.1424	28.288	1
87.4752	56.2688	1
108.109	65.3056	1
39.8592	24.7552	1
24.6016	13.3888	1
22.4768	12.9024	1
44.4928	24.4224	1
14.2592	7.3216	1
141.286	81.408	1
40.5248	24.2688	1
68.608	41.3696	1
48.1024	28.2624	1
31.5904	18.4832	1
32.64	18.6368	1
31.2832	16.3328	1
86.7328	47.6928	1
237.44	36.6592	1
48.3584	28.16	1
84.4544	37.7344	1
55.296	33.28	1
25.1904	13.44	1
33.2032	19.1232	1
66.5856	40.832	1
32.512	18.3296	1
33.5872	20.4288	1
43.5712	24.5248	1
22.7584	11.9552	1
41.6	26.8032	1
22.5024	12.6464	1
29.824	19.0208	1
22.2464	14.6432	1
19.1232	11.2896	1
10.5216	4.48	1
7.0656	1.3824	1
117.427	52.9152	2
22.784	13.184	2
10.9824	3.968	2
11.5968	5.8368	2
26.4448	15.7952	2
20.0448	11.0848	2
176.41	25.2672	2
26.88	15.6928	2
6.7072	2.2784	2
55.7056	31.3344	2
48.9216	30.0032	2
31.1552	17.92	2
23.296	10.7264	2
19.1488	8.9344	2
32.6144	20.608	2
89.7536	38.4768	2
153.139	80.896	2
25.0112	14.1824	2
40.4736	22.784	2
39.0912	22.9376	2
56.2176	28.032	2
22.0416	12.3136	2
38.0416	23.3728	2
53.6576	33.024	2
29.9776	13.7216	2
33.92	17.4336	2
44.8	23.552	2
26.1632	14.5664	2
41.4464	25.3952	2
98.2528	50.5088	2
62.1824	28.288	2
45.44	25.7792	2
45.312	27.5456	2
34.8928	20.096	2
140.39	76.1344	2
53.4784	24.9344	2
60.8768	29.1072	2
55.9872	30.7968	2
33.4592	20.5056	2
25.728	14.976	2
27.0336	12.9024	2
32.6656	19.968	2
44.4416	27.4432	2
39.8336	23.0912	2
84.1728	51.7376	2
45.2352	27.3664	2
83.9168	45.2608	2
42.752	22.9376	2
62.1568	35.1488	2
24.704	12.928	2
53.9136	31.8208	2
38.8864	25.4464	2
8.8064	3.8912	2
36.2752	20.3264	2
67.0976	40.0896	2
57.6	36.5568	2
33.7152	20.5568	2
12.9024	7.1168	2
91.136	50.0224	2
66.7648	41.8304	2
22.2464	11.1616	2
312.064	66.816	2
52.0192	29.2864	2
66.304	37.9136	2
57.7024	29.3888	2
41.984	26.1888	2
64.4096	38.8096	2
192.589	107.75	2
51.3024	28.2624	2
92.544	43.008	2
54.4512	28.7488	2
25.9072	12.7232	2
38.5024	23.9616	2
44.0832	27.52	2
24.2176	13.0048	2
45.2352	27.4944	2
31.36	19.7376	2
23.552	13.2096	2
65.5872	40.064	2
24.3712	11.4944	2
322.867	60.544	2
53.6064	33.6128	2
29.7728	15.2576	2
143.309	77.2096	2
26.6752	14.4896	2
28.2368	16.5376	2
68.2752	42.624	2
52.352	33.0496	2
31.5136	20.5824	2
72.064	41.4976	2
24.6016	13.7728	2
64.8704	40.6016	2
65.6896	38.3744	2
35.1232	19.6864	2
27.5456	14.1824	2
22.8608	13.4144	2
32.6656	20.4544	2
28.4928	15.1296	2
41.3696	27.3664	2
33.664	20.0192	2
44.9536	26.1376	2
48.0768	31.2832	2
120.755	67.2512	2
13.7216	7.3728	2
83.2256	50.3552	2
1082.55	62.2336	2
51.4048	32.5376	2
610.714	55.2448	2
68.2496	36.5824	2
44.4928	28.1344	2
70.2464	41.1136	2
25.4464	14.592	2
332.416	31.2832	2
96.6912	49.9968	2
28.6208	15.616	2
67.2512	41.7536	2
74.9568	37.5552	2
101.299	52.224	2
39.5264	21.7088	2
75.264	48.9216	2
63.872	31.36	2
73.1648	41.2928	2
31.7696	16.8192	2
879.027	172.672	2
79.9232	48.128	2
42.752	26.9056	2
26.5728	13.44	2
711.629	64.0512	2
80.8192	44.6208	2
62.2848	29.5168	2
39.7056	24.0896	2
133.709	74.9312	2
726.554	97.4848	2
2165.22	91.904	2
53.504	33.4592	2
46.8736	25.8304	2
47.7696	29.2096	2
63.9232	35.2512	2
59.3664	35.9168	2
59.5456	28.7744	2
409.498	39.552	2
36.992	20.3008	2
31.488	15.872	2
29.5936	15.4112	2
80.7168	40.7296	2
52.096	25.3952	2
48.8448	23.7056	2
87.3728	51.8144	2
38.2976	20.1728	2
121.216	59.8528	2
35.0208	15.5648	2
17.1264	7.9616	2
24.96	12.5184	2
32.896	17.0752	2
23.1424	11.5968	2
38.0928	18.6368	2
18.1248	7.808	2
20.608	9.344	2
26.1376	13.2096	2
58.3936	32.9984	2
24.8576	12.672	2
1587.15	93.6704	2
37.7088	19.2512	2
23.6544	11.8784	2
31.9488	15.4368	2
10.9568	4.3776	2
25.8304	13.2864	2
68.3008	39.5008	2
72.3456	34.1248	2
58.496	34.1504	2
50.304	24.32	2
48.8448	27.4176	2
44.672	23.168	2
40.9088	22.7584	2
34.2784	19.2512	2
91.5968	47.0528	2
32.5376	15.6416	2
45.44	26.6752	2
49.2544	29.0304	2
51.4816	23.4752	2
850.406	94.8992	2
71.1936	43.0336	2
40.5504	20.864	2
61.6704	34.9184	2
38.6816	20.48	2
42.0096	23.7568	2
91.4432	52.6592	2
398.515	92.8512	2
156.186	45.2352	2
45.3632	25.8304	2
101.222	55.0912	2
26.112	14.2336	2
24.0128	11.8784	2
30.6176	14.6944	2
64.5888	31.7184	2
29.9776	14.6176	2
10.3168	3.1744	2
221.491	34.9184	2
35.6864	20.4544	2
23.0912	11.52	2
13.7216	5.9648	2
79.5136	41.6256	2
33.1264	18.2528	2
68.1984	40.1664	2
42.4704	24.2176	2
46.8224	28.5184	2
60.2112	34.2272	2
106.342	50.2784	2
61.5168	39.424	2
31.9744	17.0752	2
49.7152	23.5264	2
32.8448	16.4864	2
33.4336	19.0464	2
32.9216	18.8928	2
36.3008	20.5568	2
148.506	75.52	2
14.1568	7.168	2
39.68	21.4016	2
426.982	54.4768	2
119.578	64.0256	2
24.6272	9.8304	2
118.963	61.2352	2
31.5136	18.8672	2
76.3648	45.1584	2
41.3952	24.2688	2
45.7472	23.3984	2
31.6928	17.0752	2
23.6544	12.0832	2
21.5552	13.3888	2
93.7984	42.8032	2
55.808	33.6896	2
48.3328	25.856	2
242.765	24.32	2
48.9216	26.8544	2
1371.98	126.746	2
219.904	34.3552	2
651.93	93.8496	2
228.634	51.5072	2
183.424	88.9088	2
34.0224	15.8464	2
664.883	47.7952	2
45.5936	26.8544	2
48.1536	30.1824	2
76.544	44.6976	2
810.726	39.1936	2
83.6096	40.576	2
137.011	62.6688	2
237.926	33.5616	2
101.018	55.5776	2
32.768	18.7392	2
12.544	6.4	2
4483.48	145.92	2
40.4992	21.7856	2
10.2144	5.1968	2
53.9392	32.1536	2
43.8784	24.4224	2
10.9824	4.4288	2
34.5344	17.6896	2
34.7136	21.4016	2
33.024	18.4576	2
49.0496	25.8816	2
41.6512	25.7792	2
68.5056	39.808	2
24.7296	14.0032	2
15.6416	7.424	2
200.474	88.2688	2
43.5712	25.1648	2
376.269	73.6	2
31.616	16.9984	2
41.4208	24.4992	2
2026.44	68.5824	2
20.1984	10.2144	2
1519	52.3008	2
1435.44	89.4208	2
46.9248	24.6784	2
36.5056	19.6096	2
510.387	33.024	2
33.92	16.128	2
47.8464	24.32	2
36.4544	20.5568	2
687.693	23.1424	2
21.888	11.2384	2
19.7888	10.5728	2
36.5824	19.84	2
43.1104	23.2192	2
56.2176	28.9792	2
30.6688	19.3536	2
128.23	69.4016	2
33.92	18.2528	2
33.4336	17.6896	2
79.6928	41.2672	2
55.3728	28.9024	2
90.3168	56.3712	2
53.5296	32.0768	2
39.9616	22.272	2
22.7584	11.3664	2
33.3056	18.7648	2
30.6688	16.6656	2
38.2208	19.5584	2
7707.01	242.048	2
58.3424	35.4304	2
33.6128	19.5072	2
20.8128	10.5728	2
24.9344	13.0816	2
35.3536	18.8672	2
219.827	46.4128	2
82.3296	39.0912	2
703.514	39.1936	2
25.1904	13.2864	2
1031.94	77.4656	2
50.1248	26.3936	2
44.288	23.7824	2
3828.94	57.8304	2
29.1584	14.4128	2
25.5744	13.6448	2
89.7792	59.3152	2
32.4096	19.2	2
33.536	18.0992	2
22.6304	11.4176	2
25.9584	12.8256	2
4451.25	70.6048	2
1165.47	39.7056	2
46.4896	26.0864	2
39.9872	18.7392	2
13.824	6.3488	2
32.6656	16	2
79.0528	46.9504	2
22.0928	10.1888	2
4667.7	101.222	2
28.7488	13.5424	2
28.1088	14.464	2
47.744	28.7488	2
26.368	13.0816	2
54.0928	21.8368	2
40.8576	21.9648	2
17.8176	6.2976	2
42.7008	20.992	2
71.7568	38.9376	2
1065.27	83.0464	2
55.1168	31.0528	2
224.563	148.07	2
29.8496	15.1808	2
35.0464	17.2544	2
27.1872	14.0544	2
29.0304	15.0784	2
444.006	33.024	2
37.2224	21.1456	2
1911.19	80.4352	2
1003.44	9.344	2
27.5712	14.4128	2
33.664	18.6112	2
39.808	21.248	2
45.2352	23.8336	2
953.088	105.088	2
30.2336	14.2336	2
21.5552	10.496	2
3127.04	117.018	2
28.6208	14.976	2
23.808	11.6736	2
315.904	44.2112	2
102.298	51.8912	2
20.7872	10.1632	2
69.632	46.5152	2
18.1248	8.2432	2
1163.57	23.552	2
78.0544	33.4336	2
52.8384	29.0048	2
34.1248	17.3824	2
13.7472	6.4768	2
37.2224	19.6096	2
37.12	17.8432	2
53.0176	29.0816	2
22.5024	10.9824	2
28.288	13.3632	2
71.3216	25.8304	2
38.6816	19.7888	2
31.3344	16.384	2
50.0736	26.9824	2
61.44	30.9248	2
36.864	19.6864	2
22.144	10.8544	2
51.3536	26.3424	2
30.1568	16.128	2
369.51	10.1888	2
46.0032	24.8832	2
71.8592	40.704	2
50.9952	25.088	2
27.0336	13.5936	2
1597.11	72.9088	2
2608	81.024	2
33.1264	18.2528	2
269.261	16.128	2
42.88	20.6848	2
74.0864	42.2912	2
22.016	10.7264	2
19.84	9.856	2
22.5024	10.88	2
229.581	48.8192	2
40.0128	21.7856	2
32.0512	17.5616	2
35.456	20.9408	2
31.3088	16.128	2
32.9472	17.5616	2
30.1312	15.6928	2
29.4656	15.5392	2
670.925	39.9872	2
31.616	17.4592	2
409.856	46.4384	2
436.454	42.0864	2
22.2464	11.136	2
561.357	61.9776	2
20.7872	10.2912	2
4181.58	101.248	2
35.6608	19.2768	2
121.83	27.392	2
218.368	44.6464	2
2008.76	122.598	2
30.8736	16.3072	2
39.8336	19.2512	2
45.6192	25.9584	2
23.552	12.2368	2
79.6416	41.1904	2
677.939	31.5136	2
30.2848	16.384	2
20.1728	10.2656	2
615.962	21.3248	2
34.7136	18.9696	2
43.4944	24.8064	2
30.976	16.9472	2
35.712	21.1968	2
55.296	25.1904	2
46.0032	23.9616	2
31.3344	15.488	2
984.371	72.4992	2
41.4976	23.2448	2
70.4	38.7584	2
1516.13	111.821	2
618.112	54.6304	2
22.5024	11.1104	2
470.758	40.6272	2
23.3472	11.9296	2
50.432	28.672	2
29.9264	14.7712	2
21.4784	10.9568	2
1615.31	113.28	2
48.9984	29.7984	2
226.099	8.7296	2
22.528	11.2128	2
13.3376	6.912	2
31.36	17.3824	2
22.9888	11.6224	2
30.336	16.256	2
40.576	22.7584	2
29.0048	15.616	2
29.9008	16.6656	2
32.6656	16.1536	2
23.1168	11.8272	2
42.0352	22.016	2
26.3424	12.3648	2
29.6448	17.0496	2
282.086	32.64	2
38.3744	12.7488	2
122.982	26.4704	2
520.653	93.0816	2
35.456	15.3344	2
663.552	54.6048	2
82.5344	38.272	2
3096.52	16.2304	2
206.976	25.7536	2
26.7008	13.4912	2
24.3712	11.1872	2
39.2192	20.1728	2
37.6576	8.9344	2
36.9152	18.9696	2
26.4704	12.4416	2
43.52	22.5024	2
44.5952	23.1936	2
24.1408	11.1616	2
498.995	72.1408	2
37.2224	19.8656	2
15.2832	6.912	2
2489.06	112.896	2
472.909	34.9184	2
20.736	9.8048	2
67.7888	40.5248	2
424.448	22.5792	2
139.418	34.8416	2
5889	67.8912	2
17.4336	8.6272	2
62.0288	33.2544	2
24.2432	12.1856	2
220.979	24.448	2
281.702	31.5648	2
46.7968	25.856	2
41.7792	22.144	2
76.416	30.5152	2
27.7504	14.72	2
695.168	43.264	2
30.2336	16.0768	2
35.328	17.0496	2
31.2832	16.8448	2
1271.65	42.8288	2
41.4464	21.9648	2
56.9344	28.5696	2
16.9728	8.1408	2
22.1184	11.3152	2
33.92	18.1504	2
46.2592	25.8048	2
17.3312	8.8064	2
9.3184	4.6848	2
32.4864	16.8192	2
92.5696	48.9472	2
458.24	29.6192	2
30.8224	13.0304	2
33.92	18.4832	2
40.7552	24.1408	2
1111.07	17.6896	2
49.8688	27.0336	2
31.4368	16.4864	2
27.904	15.2576	2
308.147	45.7216	2
23.9872	12.16	2
31.8976	17.1008	2
480.589	48.5888	2
26.3424	14.208	2
9.8304	4.736	2
1127.19	36.8384	2
25.1648	13.7216	2
352.384	41.728	2
27.2896	14.5664	2
226.099	22.9376	2
4259.05	44.7232	2
1372.52	86.0416	2
2987.03	114.253	2
12.8256	6.5536	2
26.5984	13.1584	2
22.3744	11.3408	2
22.6048	12.16	2
28.6976	12.0832	2
33.28	16.8192	2
35.5584	18.9952	2
16.2304	8.4224	2
349.952	30.7712	2
22.8096	11.5712	2
50.6112	19.712	2
507.238	37.5808	2
314.726	17.1776	2
36.5312	20.1472	2
19.6608	10.2912	2
36.1984	20.4544	2
12.5696	5.1968	2
39.3472	21.7088	2
46.9248	25.7536	2
18.56	9.6768	2
767.846	8.96	2
397.107	21.3248	2
29.6704	15.0272	2
682.419	21.888	2
16.896	8.8832	2
34.5856	18.5088	2
47.3856	25.7536	2
171.264	22.5536	2
20.3776	10.1888	2
128.358	12.544	2
33.408	18.944	2
5.888	2.5344	2
3008.64	36.4288	3
366.285	5.632	3
1157.04	35.8656	3
505.088	15.2832	3
137.856	8.7296	3
84.1728	6.1952	3
32.6144	17.9456	3
38.1696	21.5808	3
28.3136	15.36	3
27.8784	13.8496	3
10.752	5.4528	3
10.3424	5.4272	3
367.923	28.9536	3
45.312	23.808	3
19.9936	10.2656	3
42.6496	22.9888	3
107.494	15.9744	3
42.3936	23.4752	3
1205.89	33.9712	3
117.427	14.336	3
32.5376	17.536	3
1599.74	40.192	3
34.5344	17.6128	3
49.9968	26.8288	3
1997.93	47.4368	3
25.8048	13.1072	3
28.2368	14.2848	3
28.288	15.5648	3
3225.27	110.925	3
25.7792	12.9792	3
19.1232	9.8304	3
126.95	74.1376	3
20.7872	11.4944	3
259.046	18.2016	3
68.2752	37.3248	3
10.2912	5.1712	3
21.2224	10.9056	3
21.888	11.2128	3
4293.02	67.968	3
2381.47	123.366	3
29.8752	16.0512	3
38.3488	20.608	3
10721.5	188.928	3
42.1632	22.3232	3
24.1408	12.6464	3
21.1456	10.112	3
26.4448	12.2112	3
21.0432	10.0352	3
25.8304	11.264	3
28.6208	13.3376	3
53.76	28.8	3
395.571	15.4624	3
12.4416	0	3
19.1488	8.6528	3
48.128	27.5456	3
49.5104	27.7248	3
10.3168	4.8896	3
29.1072	15.4624	3
226.099	13.312	3
717.67	40.96	3
366.618	12.0064	3
93.2864	51.8144	3
608.845	65.3312	3
118.579	20.9408	3
410.957	2.56	3
19.84	9.8304	3
30.4128	3.3024	3
4746.96	18.6112	3
62.6944	29.9008	3
17.1264	8.3712	3
11.136	4.608	3
39.7056	19.6608	3
256.819	19.84	3
226.099	14.976	3
635.187	35.0208	3
424.781	31.8976	3
327.731	12.5184	3
717.747	44.3648	3
8847.16	98.4576	3
14.1056	6.912	3
24.2944	12.7232	3
19.2512	9.6512	3
29.44	13.9264	3
19.0976	8.9088	3
16.6912	8.448	3
36.608	20.5824	3
28.2112	12.9024	3
23.6288	10.7008	3
17.6384	8.8576	3
22.1952	10.752	3
39.7312	19.968	3
32.1536	16.2816	3
20.0192	10.368	3
1549.75	36.9152	3
226.099	23.1936	3
27.1616	14.208	3
8.8064	4.4288	3
18.9184	9.4208	3
11.1104	5.7856	3
43.264	23.7824	3
12.1344	6.3232	3
12.7488	5.2224	3
17.8432	9.1648	3
20.3008	10.3936	3
1935.16	2.8928	3
1981.21	33.1776	3
6896.23	101.632	3
160.922	9.1392	3
19.0976	9.7792	3
25.9328	14.3104	3
1205.96	54.0416	3
354.33	24.5504	3
650.803	34.816	3
27.7504	14.8992	3
21.8624	10.7776	3
38.7584	19.712	3
63.1552	37.8624	3
26.6496	15.3344	3
25.1904	13.1072	3
44.288	25.4464	3
427.827	20.7872	3
9.216	4.7872	3
31.5136	17.4592	3
24.7552	12.416	3
21.1456	11.264	3
9.5232	4.864	3
26.624	14.6176	3
23.0144	12.416	3
26.2656	14.3616	3
508.493	26.112	3
26.496	14.336	3
18.2016	9.3184	3
35.6096	15.36	3
15.4368	8.5504	3
74.1632	44.0576	3
19.9168	10.2144	3
8594.48	117.402	3
7.3472	3.3792	3
539.622	29.4912	3
17.6896	8.704	3
252.544	23.6544	3
23.424	12.5696	3
21.7088	11.0848	3
230.963	21.9392	3
8.32	3.4048	3
39.3472	21.6576	3
13.8496	4.3776	3
2877.88	65.4336	3
229.862	24.4992	3
16.9984	8.832	3
39.8592	21.504	3
30.3616	16.3328	3
29.9008	16.7168	3
378.24	12.6976	3
307.021	21.2224	3
23.9616	13.4656	3
27.52	15.232	3
18.048	9.2672	3
26.3424	14.8736	3
14.2848	7.2704	3
18.6624	9.9328	3
19.4048	9.8304	3
51.8144	26.8032	3
40.0896	22.144	3
395.776	19.712	3
46.08	22.5024	3
26.0608	13.9776	3
5805.75	104.781	3
17.8944	8.704	3
34.5856	18.3552	3
17.2032	9.1392	3
2467.4	94.7712	3
22.7328	11.008	3
228.429	28.6976	3
17.5616	8.192	3
17.408	8.192	3
15.5648	8.0384	3
25.9328	14.3872	3
18.688	9.7536	3
21.9904	10.9568	3
17.9968	9.5488	3
30.8224	16.64	3
18.1248	9.1136	3
11.6224	5.7344	3
18.1504	8.4992	3
226.099	15.5392	3
10.4448	5.1712	3
1838.64	28.7488	3
26.368	13.8752	3
41.1648	5.9392	3
33.3568	16.7168	3
10.5984	4.3008	3
23.4752	11.648	3
20.6336	9.984	3
434.304	12.8768	3
26.5216	13.7472	3
18.2784	9.1904	3
10.7776	1.5872	3
27.0592	13.8496	3
30.0288	16.2304	3
25.7792	12.0832	3
231.782	15.8464	3
1268.71	20.7616	3
25.8048	7.2704	3
46.3616	24.8832	3
382.336	17.4592	3
21.7856	10.624	3
28.6208	14.72	3
15.2576	7.0656	3
35.328	17.6896	3
226.099	17.5872	3
9183.85	175.36	3
17.9712	9.3696	3
21.9392	11.9296	3
766.182	1.8688	3
36.352	19.5584	3
11.8784	5.4272	3
14.4128	7.3216	3
25.6	13.9008	3
21.1456	10.4192	3
340.582	24.3456	3
57.7792	22.2976	3
46.6688	22.7072	3
31.3088	15.9488	3
16.4608	8.5248	3
850.381	19.5328	3
19.584	9.4976	3
34.1504	20.5312	3
612.326	5.9136	3
17.3312	4.8128	3
32.768	16.3584	3
13.7472	6.0416	3
22.7584	10.9824	3
7.68	3.6352	3
445.568	10.0096	3
29.9264	15.3344	3
18.0224	9.5744	3
8.2688	4.6336	3
22.528	12.6208	3
26.88	13.4912	3
890.24	49.1008	3
309.581	24.576	3
47.104	23.3728	3
316.288	17.4336	3
15.5392	7.5776	3
7.2192	3.6096	3
17.7664	9.1904	3
35.84	18.1504	3
32.6656	18.5856	3
312.474	13.7472	3
10.0608	5.3504	3
21.2992	10.6752	3
394.854	3.456	3
226.611	42.0608	3
10.0864	5.2736	3
1874.69	52.4032	3
451.686	25.8304	3
42.6496	24.4992	3
20.6592	10.0608	3
18.4576	10.6752	3
40.2432	21.3504	3
460.365	19.6352	3
16.384	8.8576	3
9.2928	4.9152	3
3395.58	21.9648	3
28.7232	16.896	3
51.6352	31.36	3
45.6192	22.6048	3
47.4624	26.9568	3
17.6896	9.4464	3
24.6016	14.208	3
37.6064	22.2464	3
29.3632	12.1856	3
19.2512	10.1888	3
9.7024	5.2224	3
280.141	13.2864	3
13.7984	7.296	3
13.6192	6.912	3
3731.84	88.9088	3
23.168	13.0816	3
33.664	18.3296	3
7.7568	4.1984	3
8.0128	4.0192	3
13.4144	7.424	3
9.1648	4.7872	3
6.9888	4.1728	3
9.1648	3.6864	3
14.7968	8.2432	3
12.7488	5.7088	3
15.4368	8.064	3
1053.34	29.3888	3
16.9216	9.3184	3
4.8896	0	3
15.4368	8.2432	3
1705.93	46.592	3
54.2976	29.3632	3
5.0432	0.4096	3
5.8624	0.4096	3
5.12	0.0256	3
25.7024	4.352	3
7.68	4.352	3
7.4496	4.352	3
8.7808	4.9408	3
10.752	5.6576	3
14.592	7.7824	3
12.544	5.76	3
30.6432	15.9488	3
358.733	20.4544	3
30.0032	16.0768	3
25.2672	13.696	3
7885.82	117.862	3
518.656	12.544	3
8.0896	4.5056	3
226.099	3.5072	3
6.2208	3.1488	3
30.2336	10.9568	3
35.6864	19.456	3
23.6544	12.1856	3
5.8112	2.1504	3
9.344	4.224	3
47.1296	25.6512	3
11.1616	2.2784	3
18.9952	9.2672	3
599.501	11.904	3
29.4912	15.6416	3
1271.01	18.0224	3
16.7936	9.1648	3
30.336	15.232	3
2.8928	0	3
24.32	13.7728	3
8.1664	4.5056	3
8.2432	4.1984	3
12.8256	2.9952	3
28.8768	0	3
76.8	17.4336	3
36.7104	19.3024	3
27.6992	14.976	3
15.5136	2.2784	3
6.528	0	3
9.216	0.3072	3
6.7584	3.4816	3
10.88	1.5872	3
31.8976	18.1248	3
14.336	7.7568	3
29.1072	0	3
1087.05	37.8368	3
24.064	12.2624	3
4.8128	0	3
9.088	3.2256	3
9.088	5.0176	3
35.6864	11.4432	3
13.4656	7.168	3
29.696	14.9504	3
12.5696	6.3232	3
110.438	56.2688	3
22.656	11.1104	3
11.0592	5.6832	3
23.9872	13.3888	3
8.9344	4.8384	3
1375.67	28.2112	3
10.0864	0	3
6.3232	0.5376	3
12.9024	6.784	3
17.8944	2.9952	3
619.597	31.0272	3
22.6048	11.008	3
16.6912	0	3
36.352	4.7104	3
4.9408	0	3
17.7152	9.088	3
28.5696	14.3872	3
5.1968	0	3
9.5488	4.0448	3
49.3056	22.4	3
15.36	0	3
35.0976	17.1776	3
4.096	0	3
9.856	5.1456	3
19.2256	0	3
8.0384	4.2496	3
6.0928	0	3
5.376	0	3
24.0384	12.6464	3
8.8832	4.5824	3
7.6032	3.7632	3
31.8464	18.2272	3
3.712	0	3
21.0688	10.752	3
9.5488	4.9664	3
18.8672	9.344	3
153.216	26.6496	3
28.416	14.8224	3
677.427	25.1136	3
9.5744	0	3
10.8032	5.4272	3
29.312	16.5888	3
9.9584	5.376	3
18.5088	0	3
8.704	4.48	3
4014.95	66.7648	3
867.149	4.4544	3
19.5072	1.28	3
26.9824	14.1568	3
15.8464	8.1664	3
11.2896	0	3
25.2672	0	3
9.9072	0	3
17.1264	8.7296	3
9.344	4.864	3
7.808	0	3
8.6016	4.5824	3
5.6832	0	3
7.2192	0	3
18.1504	9.1136	3
17.8688	4.7872	3
8.8064	4.5824	3
2708.61	41.9072	3
13.2608	0	3
133.325	41.4976	3
6.2208	3.3792	3
22.8096	12.5184	3
137.37	6.4768	3
5.9904	3.1232	3
15.5648	8.192	3
6.272	3.328	3
789.837	48.6912	3
15.744	2.4832	3
5.0432	0	3
18.688	9.9072	3
4.7616	0	3
17.8432	1.1008	3
24.4736	10.2912	3
6.4	3.7632	3
187.315	92.3648	3
14.5408	7.3216	3
18.0224	7.1424	3
6.016	1.0752	3
45.2864	27.7248	3
29.6192	15.5136	3
12.0576	1.3824	3
5.888	0	3
6.8096	3.5328	3
72.8064	22.8864	3
1444.99	30.208	3
79.2064	17.92	3
8.064	0	3
11.8272	5.7344	3
18.7904	9.8816	3
4887.35	103.45	3
508.314	14.2592	3
233.574	23.5008	3
11.6224	6.0928	3
5.8112	2.5856	3
6.784	3.9424	3
9.9328	5.4272	3
18.9696	10.1632	3
8.96	0	3
4.7616	0	3
1052.36	22.5024	3
23.3216	12.4416	3
9.6	5.2224	3
19.9424	10.4448	3
32.5376	4.1216	3
508.826	16.3072	3
41.1648	15.6416	3
19.328	10.8288	3
4.48	0	3
10.8032	0.8448	3
5.9136	1.5872	3
136.474	32.128	3
20.0704	10.9312	3
68.1984	2.7136	3
17.152	9.0624	3
9.216	4.7104	3
18.2784	10.9568	3
19.84	10.5216	3
13.7216	7.7824	3
13.9264	8.1152	3
226.099	8.576	3
14.3104	8.1664	3
10.0096	0	3
29.4144	15.5648	3
15.488	8.4736	3
19.6096	8.192	3
20.0448	2.944	3
8.3968	4.5056	3
16.5888	8.6016	3
1293.21	18.9952	3
16.3328	8.8576	3
23.7568	13.7984	3
468.941	193.613	3
22.2464	12.928	3
12.3136	6.1952	3
19.3536	9.3952	3
15.3088	8.6016	3
5.3248	0.5632	3
17.6896	9.2928	3
11.6992	6.2208	3
210.15	59.8272	3
17.2544	10.112	3
25.2672	11.264	3
10.752	5.6576	3
14.08	7.3472	3
20.3776	11.2128	3
29.4144	14.8736	3
5.8368	1.3056	3
8.32	3.9936	3
11.2896	5.76	3
24.064	0	3
6.2976	2.2784	3
30.7712	0	3
13.2864	6.7328	3
15.872	8.7552	3
15.1808	3.4048	3
5.504	1.0752	3
13.5936	7.4752	3
17.0496	2.8928	3
8.8064	4.4288	3
29.312	12.8256	4
3.8656	0.4608	4
49.6128	31.0528	4
28.1088	15.232	4
[truncated: 4,690 more rows]

## Sheet: Fig 5 Supp 1B raw p fluorescens
cell_area	repeat
0.0768	1
0.896	1
2.3808	1
5.5552	1
0.256	1
1.28	1
3.2256	1
0.2048	1
35.968	1
1.28	1
100.89	1
2.2272	1
9.984	1
16.2304	1
6.3232	1
1.9456	1
0.1792	1
21.1968	1
3.2256	1
13.312	1
16.384	1
7.8592	1
5.8112	1
9.0112	1
5.6064	1
4.0448	1
8.3968	1
0.0512	1
6.4768	1
5.6064	1
3.968	1
5.6832	1
4.0704	1
4.5824	1
1.792	1
2.8928	1
4.6336	1
18.176	1
1.792	1
6.6816	1
5.2224	1
2.8672	1
1.4336	1
2.048	1
5.2736	1
4.48	1
0.5376	1
4.736	1
3.712	1
0.1792	1
15.0272	1
4.2496	1
2.9696	1
1.8688	1
1.92	1
15.2576	1
5.2224	1
3.2256	1
3.9168	1
3.8912	1
5.0176	1
4.992	1
0.8192	1
7.296	1
8.0128	1
5.6064	1
5.376	1
3.5584	1
3.6864	1
2.5088	1
1.408	1
5.376	1
2.816	1
16.9472	1
3.4048	1
3.5072	1
3.3792	1
2.816	1
8.576	1
7.9872	1
2.56	1
6.6304	1
3.1232	1
4.864	1
7.68	1
5.9392	1
0.0512	1
0.0768	1
10.9568	1
4.608	1
7.1936	1
5.1712	1
2.2784	1
4.6592	1
4.4288	1
12.3648	1
5.504	1
4.224	1
5.1456	1
7.5008	1
3.7632	1
1.1008	1
5.9648	1
6.2208	1
6.4768	1
2.7392	1
2.7904	1
6.6304	1
2.6624	1
4.4544	1
2.5088	1
3.1744	1
5.8112	1
3.2256	1
2.6624	1
10.7776	1
6.272	1
4.6848	1
3.8912	1
5.1968	1
3.5072	1
14.208	1
5.1712	1
7.7056	1
2.9952	1
7.9616	1
4.2496	1
3.6352	1
7.808	1
36.0192	1
8.4224	1
4.9408	1
1.1776	1
12.3904	1
3.6864	1
4.608	1
7.5776	1
1.1264	1
0.1536	1
7.424	1
20.1984	1
2.2016	1
5.6832	1
5.6832	1
2.7392	1
2.7392	1
13.4912	1
1.3568	1
4.7616	1
4.3008	1
4.4032	1
3.1232	1
14.6176	1
80.5632	1
5.4272	1
12.4928	1
9.4464	1
5.8368	1
2.0224	1
5.9904	1
2.2016	1
4.4544	1
0.0512	1
4.1472	1
0.5376	1
5.7088	1
11.5456	1
3.3792	1
8.0128	1
11.8784	1
3.1744	1
2.6368	1
2.3552	1
5.1968	1
4.8896	1
0.1536	1
2.9184	1
5.888	1
8.7296	1
4.224	1
348.8	1
5.7088	1
4.3008	1
11.4176	1
6.6048	1
19.1488	1
13.9264	1
0.256	1
2.8416	1
5.8624	1
12.0064	1
6.3488	1
4.0192	1
9.4208	1
5.2736	1
0.0768	1
3.6352	1
0.3072	1
16.6912	1
9.4464	1
1.2288	1
10.4448	1
1.4592	1
5.376	1
3.6096	1
1.2544	1
1.0752	1
1.6896	1
2.2016	1
28.0832	1
9.4464	1
3.9936	1
9.3184	1
5.5552	1
7.5776	1
0.0768	1
3.4304	1
13.5424	1
1.1776	1
106.752	1
9.0112	1
2.0736	1
6.4768	1
0.4096	1
5.4016	1
8.5248	1
3.0976	1
0.384	1
2.4064	1
1.8944	1
11.1104	1
2.3552	1
0.1024	1
15.0016	1
2.5344	1
0.4096	1
1.6128	1
11.0848	1
0.9728	1
2.4064	1
5.5552	1
2.4832	1
2.3296	1
6.4512	1
0.1024	1
2.3552	1
5.6832	1
1.9712	1
4.8128	1
0.6912	1
2.8672	1
24.3456	1
1.536	1
0.2048	1
1.792	1
0.0768	1
0.128	1
2.8672	1
5.0432	1
2.4064	1
6.6816	1
5.5552	1
1.3824	1
6.2464	1
5.9392	1
0.1536	1
5.7344	1
0.2816	1
1.5616	1
6.0928	1
166.835	1
0.0768	1
9.728	1
4.4544	1
0.3328	1
1.7152	1
12.8256	1
0.384	1
5.9136	1
8.448	1
0.0512	1
4.6592	1
2.816	1
2.7904	1
9.6768	1
0.256	1
3.6352	1
1.92	1
2.3552	1
4.3264	1
0.3072	1
1.6384	1
2.6112	1
0.1024	1
0.4096	1
3.584	1
27.2896	1
5.9136	1
0.128	1
16.1024	1
0.9472	1
0.2816	1
7.7568	1
12.6976	1
0.0512	1
0.1024	1
1.1264	1
7.7568	1
0.0512	1
20.8384	1
0.0512	1
3.9168	1
2.9952	1
155.725	1
3.0208	1
0.1024	1
0.7168	1
6.9632	1
3.2768	1
6.8608	1
2.6624	1
5.76	1
6.7328	1
4.5824	1
0.9472	1
7.0912	1
0.0512	1
1.2288	1
11.5968	1
0.1536	1
0.0512	1
2.3552	1
4.7104	1
0.0512	1
2.4576	1
1.0496	1
4.6336	1
0.7936	1
1.8944	1
26.1376	1
1.8688	1
2.4576	1
0.4352	1
17.3568	1
0.0512	1
0.0768	1
1.4336	1
0.0512	1
0.2048	1
1.536	1
0.512	1
2.1248	1
7.1168	1
0.5888	1
6.1696	1
6.528	1
5.9904	1
0.2048	1
0.64	1
0.0512	1
3.9424	1
1.3056	1
0.0768	1
4.1216	1
0.6656	1
1.7408	1
0.1536	1
1.4848	1
4.4032	1
2.9952	1
0.3584	1
0.512	1
4.3776	1
1.1776	1
24.8832	1
1.7664	1
3.968	1
0.6144	1
7.5008	1
0.256	1
7.8848	1
0.896	1
2.9952	1
0.6144	1
4.1216	1
1.8688	1
2.8416	1
1.024	1
3.7888	1
3.3024	1
1.664	1
1.28	1
3.7888	1
5.6576	1
2.1248	1
6.1696	1
17.2032	1
2.1504	1
0.9472	1
3.8912	1
58.0864	1
0.3328	1
4.3776	1
6.0416	1
5.1968	1
2.9952	1
82.432	1
3.5328	1
4.3008	1
4.2752	1
6.1184	1
7.3472	1
0.1536	1
8.7296	1
4.9408	1
4.5824	1
0.8704	1
2.6368	1
3.5328	1
7.2704	1
10.6752	1
5.2736	1
1.28	1
1.7664	1
0.2048	1
0.9984	1
3.9168	1
29.0304	1
1.2288	1
0.0768	1
4.3776	1
2.56	1
0.7424	1
1.9968	1
2.9184	1
3.6864	1
8.1408	1
2.56	1
4.5312	1
12.6976	1
2.5856	1
6.0416	1
4.9664	1
4.4032	1
17.3824	1
68.608	1
4.3008	1
3.3024	1
1.8432	1
4.1984	1
2.2272	1
9.9328	1
134.272	1
5.5296	1
58.7776	1
7.8336	1
9.0624	1
1.2544	1
5.5296	1
0.3328	1
5.12	1
8.6272	1
1.3824	1
0.512	1
0.64	1
2.432	1
3.7632	1
1.4592	1
5.76	1
14.208	1
8.0896	1
5.4528	1
7.1424	1
3.0976	1
4.9408	1
5.1456	1
8.448	1
1.8688	1
2.3552	1
7.3216	1
5.8112	1
2.048	1
27.2896	1
1.3312	1
6.144	1
2.8928	1
2.9696	1
5.7344	1
13.5168	1
4.4288	1
6.1696	1
6.784	1
11.3408	1
2.816	1
2.4576	1
5.5552	1
1.28	1
5.5808	1
13.4144	1
2.6368	1
4.992	1
2.3808	1
16.1024	1
8.832	1
1.024	1
2.7136	1
5.2224	1
17.9712	1
6.4512	1
1.8432	1
4.8896	1
0.1024	1
1.3056	1
3.072	1
1.8176	1
5.5552	1
7.1936	1
2.2528	1
11.0336	1
4.224	1
3.0208	1
1.664	1
5.504	1
2.8416	1
7.3216	1
93.7728	1
6.8864	1
6.6048	1
13.1584	1
5.0176	1
12.0576	1
19.9168	1
8.3968	1
0.9216	1
14.6176	1
8.3712	1
11.008	1
8.6784	1
6.3744	1
3.2	1
4.1472	1
3.3536	1
15.1296	1
10.2912	1
6.3488	1
12.288	1
125.03	1
13.2096	1
5.7344	1
4.0192	1
33.2288	1
8.0384	1
8.832	1
6.2208	1
7.2192	1
6.5536	1
4.1216	1
10.9312	1
21.2224	1
4.3008	1
4.5312	1
11.4432	1
4.5824	1
5.4016	1
7.424	1
14.1824	1
3.9424	1
11.7248	1
5.9648	1
17.1008	1
7.9616	1
3.328	1
5.12	1
6.9888	1
8.0896	1
4.5312	1
6.9632	1
2.9184	1
14.9248	1
4.2496	1
1.6128	1
12.8768	1
6.3488	1
8.064	1
1.408	1
20.3776	1
3.3024	1
2.9184	1
2.4832	1
6.8864	1
2.6624	1
0.1792	1
3.0464	1
8.6016	1
4.5568	1
6.7328	1
8.4224	1
10.24	1
7.4752	1
0.128	1
2.3808	1
4.4288	1
15.488	1
4.1472	1
6.6304	1
8.6528	1
6.0416	1
5.9648	1
19.9424	1
2.2016	1
3.9168	1
6.912	1
5.12	1
0.3584	1
0.0512	1
7.9616	1
6.8096	1
4.6336	1
12.2112	1
12.3392	1
5.2992	1
3.6352	1
4.096	1
3.9936	1
0.0768	1
2.3808	1
3.4816	1
0.2816	1
4.224	1
7.1424	1
0.0512	1
1.024	1
2.048	1
16.5888	1
0.4608	1
0.4608	1
6.2208	1
4.4544	1
0.0768	1
2.56	1
0.4352	1
0.1792	1
26.8544	1
0.2048	1
0.4864	1
0.3072	1
7.424	1
5.9904	1
6.0672	1
0.768	1
5.7344	1
2.4064	1
9.9072	1
1.8432	1
0.128	1
1.2032	1
29.7984	1
25.8304	1
6.912	1
1.0496	1
10.7264	1
8.832	1
7.1936	1
1.1008	1
4.8896	1
17.2544	1
0.4864	1
8.576	1
13.696	1
13.4656	1
7.3216	1
2.9952	1
0.0512	1
4.9152	1
2.944	1
3.2512	1
5.1712	1
2.56	1
0.1792	1
1.536	1
1.6896	1
8.6528	1
2.3296	1
1.8944	1
16.5376	1
0.1536	1
4.352	1
0.1024	1
3.1232	1
10.24	1
4.8128	1
6.5792	1
6.0928	1
5.4016	1
0.9728	1
1.8176	1
28.3392	1
0.3072	1
0.4352	1
1.3056	1
0.8704	1
0.9984	1
79.744	1
0.2816	1
1.4848	1
2.7392	1
0.1792	1
6.9632	1
7.6032	1
0.0512	1
3.8656	1
0.0512	1
0.8704	1
7.68	1
1.9456	1
4.096	1
3.6864	1
3.2512	1
1.152	1
1.6384	1
8.2688	1
2.6112	1
7.424	1
1.7408	1
6.7072	1
3.8656	1
1.0752	1
14.8224	1
7.4752	1
5.0432	1
3.4816	1
5.504	1
17.28	1
7.9616	1
0.0768	1
10.624	1
4.5568	1
7.552	1
7.1424	1
3.0976	1
0.128	1
2.816	1
3.3536	1
24.9344	1
0.2304	1
8.2688	1
0.0768	1
1.9712	1
19.072	1
9.1904	1
3.456	1
4.4032	1
0.2816	1
0.0768	1
0.2304	1
2.944	1
2.8416	1
3.3024	1
22.8096	1
1.9968	1
1.9968	1
0.256	1
2.2016	1
1.664	1
0.384	1
7.5008	1
0.896	1
13.824	1
2.9696	1
4.4288	1
0.2048	1
21.9904	1
2.8672	1
30.1056	1
0.0512	1
6.272	1
5.0432	1
7.808	1
7.9872	1
4.7872	1
6.1952	1
6.2208	1
16.256	1
3.3792	1
0.0512	1
9.1648	1
2.048	1
19.8912	1
1.6896	1
2.3552	1
0.9472	1
1.6384	1
3.4816	1
36.7616	1
29.3376	1
22.7072	1
8.448	1
5.0176	1
0.0512	1
0.1792	1
3.1744	1
18.2784	1
0.3072	1
2.3296	1
1.8176	1
0.0512	1
0.1536	1
5.8368	1
0.4608	1
0.1024	1
2.4064	1
0.0512	1
4.992	1
2.2784	1
7.1424	1
2.2016	1
11.008	1
7.4496	1
4.1728	1
9.1904	1
0.0512	1
0.0512	1
3.328	1
0.0512	1
0.0512	1
0.0768	1
2.2784	1
5.8368	1
1.536	1
0.0512	1
4.224	1
5.2224	1
0.0512	1
0.0512	1
0.128	1
12.8	1
2.1248	1
6.0416	1
4.3008	1
0.2816	1
6.6816	1
121.626	1
0.0512	1
0.2048	1
2.2528	1
0.0512	1
2.6368	1
2.6624	1
1.1008	1
0.0512	1
0.0512	1
1.1008	1
0.1024	1
0.0512	1
0.0768	1
0.0768	1
2.5856	1
2.0736	1
8.192	1
2.304	1
0.6144	1
0.0512	1
0.0512	1
0.1024	1
0.7936	1
16.5376	1
0.0512	1
10.5984	1
5.9136	1
0.1792	1
7.9104	1
5.8368	1
178.714	1
0.7168	1
6.3744	1
2.7648	1
0.0768	1
0.0512	1
0.1536	1
0.0768	1
0.1792	1
7.6288	1
0.0512	1
0.2304	1
0.3072	1
2.2784	1
2.9696	1
0.0512	1
4.8384	1
1.1008	1
0.0512	1
5.6576	1
10.624	1
5.7856	1
11.3408	1
1.3568	1
0.0512	1
1.024	1
5.6832	1
14.0032	1
12.4672	1
7.5008	1
3.2512	1
0.0512	1
0.1024	1
29.4912	1
6.2208	1
1.92	1
2.176	1
0.1024	1
19.84	1
2.048	1
2.6112	1
1.3824	1
0.3072	1
6.1696	1
0.4352	1
0.0512	1
0.0768	1
0.0512	1
0.4608	1
1.4592	1
3.2256	1
8.8576	1
130.355	1
1.8944	1
2.2784	1
0.2304	1
3.6096	1
3.456	1
0.0512	1
1.5104	1
4.4544	1
4.992	1
2.048	1
0.0512	1
0.9728	1
0.0512	1
5.888	1
0.0512	1
1.024	1
1.152	1
2.4576	1
0.5376	1
0.1536	1
0.0768	1
0.1536	1
3.84	1
4.8896	1
0.0512	1
0.3072	1
0.896	1
15.5136	1
1.3568	1
5.8624	1
0.7424	1
1.2032	1
0.896	1
5.12	1
1.152	1
1.1776	1
0.0512	1
0.4608	1
7.7056	1
0.5888	1
0.0768	1
4.1728	1
2.048	1
0.0768	1
8.4992	1
4.4032	1
0.7168	1
2.5344	1
3.84	1
0.1024	1
2.1248	1
0.0768	1
14.336	1
0.512	1
6.5536	1
9.6768	1
0.7168	1
1.9968	1
5.5808	1
1.6896	1
0.1024	1
34.56	1
0.128	1
0.0512	1
5.5296	1
0.0512	1
0.0768	1
32.0256	1
196.685	1
1.0752	1
0.0512	1
0.4352	1
0.6144	1
0.7168	1
0.1024	1
5.1968	1
0.0512	1
0.0768	1
95.2832	1
6.144	1
1.1264	1
0.9984	1
0.0512	1
16.1536	1
0.1792	1
0.128	1
1.3568	1
0.0512	1
5.2992	1
0.0768	1
4.2752	1
9.1904	1
78.5152	1
0.0768	1
7.7056	1
3.5328	1
0.2816	1
0.3072	1
1.6128	1
0.0512	1
0.896	1
0.2816	1
0.6656	1
0.9728	1
2.2272	1
0.0512	1
0.0512	1
1.8176	1
85.6576	1
2.8672	1
0.9728	1
1.6384	1
0.5632	1
62.848	1
1.5104	1
0.0512	1
5.4272	1
0.9472	1
0.0768	1
7.3728	1
5.5808	1
0.0512	1
0.4864	1
8.8064	1
0.5632	1
0.4864	1
9.1392	1
4.608	1
1.0752	1
2.8672	1
0.7936	1
0.2304	1
3.2	1
3.2256	1
0.0512	1
0.0512	1
0.0512	1
77.1072	1
0.8704	1
2.3552	1
2.9952	1
4.0192	1
7.7568	1
0.1792	1
1.9968	1
0.0768	1
0.3584	1
0.0512	1
1.5104	1
0.512	1
6.1952	1
2.304	1
0.2816	1
0.9984	1
3.5328	1
5.1968	1
0.0512	1
0.3328	1
2.304	1
4.7616	1
26.3168	1
1.408	1
2.1504	1
66.8928	1
6.2464	1
0.0512	1
0.512	1
0.9472	1
0.0768	1
7.6288	1
0.7168	1
0.2304	1
13.8752	1
0.896	1
3.2768	1
0.0512	1
0.3328	1
0.9216	1
8.5248	1
4.9408	1
0.6656	1
2.8672	1
1.7408	1
2.9696	1
0.768	1
12.6208	1
12.4928	1
5.5296	1
3.7376	1
1.0496	1
3.072	1
5.9136	1
2.56	1
7.936	1
2.2016	1
1.0752	1
1.3824	1
0.0512	1
7.552	1
0.128	1
0.3072	1
4.2752	1
0.0512	1
0.0768	1
3.2768	1
0.0512	1
1.92	1
0.0512	1
0.0512	1
4.5568	1
0.0768	1
1.7664	1
10.2144	1
0.4608	1
0.9216	1
0.128	1
0.0512	1
8.576	1
0.0512	1
0.0768	1
0.0512	1
34.8672	1
0.0768	1
0.0512	1
11.4432	1
1.2544	1
17.9968	1
0.5376	1
0.896	1
0.0512	1
0.0512	1
0.0512	1
0.0512	1
35.1232	1
0.0768	1
0.9728	1
0.0512	1
0.0512	1
0.0512	1
0.0768	1
4.2752	1
3.8912	1
2.176	1
2.5856	1
0.1024	1
0.64	1
1.1264	1
0.0768	1
1.28	1
26.7008	1
0.0512	1
15.872	1
0.0512	1
0.0768	1
0.1024	1
175.334	1
9.0624	1
32.8192	1
8.448	1
3.2512	1
0.1024	1
10.1632	1
0.9216	1
0.0768	1
5.6832	1
2.8416	1
0.0512	1
1.152	1
1.4592	1
0.0512	1
0.0512	1
33.8688	1
0.1792	1
8.1408	1
0.0512	1
0.0512	1
8.1408	1
0.0768	1
36.4032	1
0.5888	1
7.552	1
1.792	1
0.0768	1
0.0512	1
0.1792	1
4.48	1
0.0512	1
0.1024	1
5.1712	1
0.64	1
5.504	1
0.0512	1
0.0512	1
0.9216	1
3.84	1
0.5632	1
1.6128	1
7.4496	1
0.9728	1
0.0512	1
1.1776	1
1.4848	1
4.4032	1
0.1536	1
11.2384	1
0.3072	1
0.2048	1
0.2304	1
0.128	1
1.8432	1
9.0368	1
20.5568	1
0.0768	1
2.2272	1
1.4336	1
0.9472	1
0.1792	1
1.28	1
6.272	1
0.0512	1
0.0512	1
7.2448	1
11.5968	1
0.0768	1
0.0512	1
1.4592	1
8.5504	1
0.64	1
0.4096	1
8.576	1
2.1248	1
4.9408	1
0.768	1
6.3488	1
7.6288	1
0.8192	1
5.0432	1
0.4096	1
9.728	1
1.1008	1
2.9184	1
0.0512	1
0.1024	1
9.3184	1
2.944	1
0.6912	1
2.7392	1
2.6368	1
0.0512	1
2.7392	1
15.616	1
0.8448	1
10.112	1
6.3232	1
0.8704	1
0.2816	1
0.2304	1
2.8672	1
8.0896	1
0.4864	1
0.0512	1
5.4784	1
8.6784	1
26.8544	1
1.2544	1
0.9984	1
1.6896	1
2.4064	1
0.1024	1
5.4784	1
0.9216	1
0.1536	1
3.5584	1
30.5152	1
0.128	1
0.1536	1
0.0512	1
0.2304	1
2.6368	1
0.0768	1
7.7056	1
0.0512	1
6.5536	1
38.0928	1
27.6992	1
0.4864	1
0.0512	1
0.0512	1
4.096	1
0.2816	1
37.0688	1
6.9888	1
0.9216	1
2.7392	1
0.0512	1
1.408	1
1.0752	1
0.7168	1
0.64	1
0.0512	1
0.2048	1
4.1728	1
2.7904	1
1.1008	1
0.7936	1
4.9664	1
0.1536	1
8.1664	1
6.0672	1
0.4864	1
12.544	1
6.8096	1
0.0512	1
2.4064	1
0.6912	1
3.9168	1
0.0768	1
7.3728	1
0.0512	1
9.9328	1
2.4064	1
13.6704	1
7.168	1
6.3488	1
2.7136	1
0.9728	1
5.2992	1
5.6064	1
5.4528	1
0.0512	1
0.8448	1
1.152	1
5.504	1
1.408	1
4.0704	1
6.144	1
0.2304	1
2.5856	1
1.1008	1
0.4864	1
8.2688	1
0.7936	1
2.2272	1
26.3168	1
30.2336	1
15.2576	1
3.6864	1
5.8112	1
5.5296	1
0.2304	1
0.0512	1
19.072	1
0.2048	1
2.2016	1
3.2768	1
3.5328	1
2.4064	1
1.5616	1
3.5584	1
10.88	1
10.1376	1
5.3248	1
6.144	1
2.8928	1
5.76	1
3.328	1
15.0016	1
5.8112	1
3.456	1
0.0512	1
6.3488	1
0.0512	1
4.5824	1
4.3264	1
4.1984	1
2.9696	1
5.6064	1
2.3552	1
13.2864	1
6.7584	1
12.416	1
0.7424	1
8.4992	1
5.2736	1
0.64	1
3.4816	1
8.0896	1
0.2304	1
0.1024	1
1.7408	1
2.0736	1
14.0032	1
2.4576	1
21.3504	1
6.4	1
10.8544	1
5.248	1
14.8736	1
1.4336	1
9.1904	1
6.4512	1
7.7568	1
1.664	1
6.6304	1
7.2448	1
1.1264	1
1.4336	1
4.224	1
0.128	1
3.5072	1
0.64	1
0.1536	1
3.6352	1
1.0752	1
3.6352	1
6.2464	1
25.9072	1
8.7552	1
6.5792	1
9.7792	1
5.76	1
19.9168	1
4.1728	1
2.2016	1
1.5616	1
5.6064	1
11.0848	1
6.3744	1
7.7568	1
6.3488	1
0.2048	1
10.0352	1
6.8864	1
0.2048	1
103.04	1
6.1696	1
8.0128	1
2.8672	1
18.7648	1
6.5536	1
8.0896	1
9.4464	1
3.4304	1
7.8336	1
3.1232	1
3.3792	1
11.6224	1
16.8192	1
5.76	1
3.3792	1
5.4272	1
5.8368	1
7.3216	1
1.5872	1
6.2208	1
3.3536	1
7.3472	1
5.632	1
0.1792	1
11.904	1
0.7936	1
0.9216	1
13.5168	1
4.2496	1
7.0144	1
11.8016	1
7.4752	1
11.1616	1
5.8368	1
2.6624	1
7.5776	1
19.84	1
0.7168	1
11.4432	1
3.456	1
6.2464	1
11.4944	1
1.6384	1
9.216	1
4.8896	1
16.6912	1
5.12	1
3.84	1
11.3152	1
5.9136	1
5.0944	1
10.3168	1
14.2848	1
1.792	1
15.232	1
6.0416	1
26.8032	1
0.3328	1
1.7152	1
1.152	1
4.3008	1
2.8416	1
3.9168	1
7.168	1
0.6912	1
3.456	1
96.1792	1
16.5632	1
1.6128	1
1.4848	1
7.0144	1
6.1696	1
2.2016	1
0.0768	1
0.0512	1
5.4272	1
21.632	1
2.7392	1
5.1968	1
5.9136	1
9.856	1
7.168	1
1.2032	1
9.4208	1
3.6352	1
10.496	1
2.816	1
4.9408	1
9.7792	1
5.1712	1
3.6608	1
6.5536	1
8.7808	1
1.4848	1
4.4544	1
1.408	1
0.1792	1
1.3056	1
6.3232	1
139.571	1
2.6368	1
1.5872	1
7.7056	1
1.4592	1
10.6496	1
1.3056	1
0.5376	1
0.5376	1
5.4272	1
4.9408	1
0.2048	1
9.5488	1
0.1024	1
0.3584	1
241.306	1
0.4096	1
5.8112	1
0.4352	1
0.1536	1
12.5952	1
14.2592	1
3.6096	1
1.5104	1
3.5584	1
3.4816	1
5.4016	1
1.8432	1
6.7072	1
14.8224	1
3.1744	1
3.5328	1
177.382	1
1.7408	1
10.5728	1
5.1968	1
19.3024	1
10.6752	1
4.5824	1
5.8624	1
1.536	1
13.2864	1
2.7904	1
10.5216	1
5.5552	1
4.48	1
11.008	1
3.4048	1
4.6336	1
8.0128	1
4.0192	1
13.696	1
12.5696	1
0.9472	1
5.7088	1
40.2176	1
7.6544	1
0.2816	1
5.6832	1
1.408	1
0.4352	1
1.9968	1
0.4608	1
6.5024	1
5.504	1
3.6096	1
6.6048	1
0.3072	1
9.3696	1
1.3312	1
22.0416	1
5.0176	1
5.7856	1
8.0384	1
4.6848	1
1.5104	1
2.4576	1
3.7376	1
7.808	1
3.9424	1
3.5328	1
3.1744	1
1.2032	1
5.6064	1
1.2544	1
6.5536	1
9.0112	1
7.6032	1
0.8448	1
4.0704	1
0.1024	1
2.9696	1
6.9632	1
4.8384	1
2.5088	1
0.5376	1
7.6032	1
6.1952	1
0.4608	1
9.1392	1
7.3984	1
8.448	1
8.8064	1
12.5696	1
0.8448	1
0.6656	1
2.6112	1
1.536	1
5.1712	1
12.6464	1
5.0432	1
13.2096	1
0.9472	1
5.5552	1
0.384	1
0.4352	1
0.2304	1
0.2816	1
7.6288	1
1.92	1
1.024	1
7.8336	1
6.528	1
26.752	1
13.6704	1
3.4048	1
7.1168	1
1.024	1
6.528	1
9.9328	1
2.0992	1
2.944	1
0.0768	1
6.3488	1
2.176	1
7.2448	1
0.2048	1
0.0512	1
1.152	1
2.5856	1
10.2656	1
18.3552	1
0.1792	1
0.9984	1
2.4064	1
7.04	1
2.432	1
12.2368	1
5.12	1
5.4016	1
4.48	1
0.0512	1
0.0512	1
6.784	1
6.1184	1
6.4256	1
20.4032	1
1.3312	1
6.4768	1
3.9168	1
22.7584	1
2.3296	1
25.3696	1
8.4736	1
6.8096	1
1.792	1
0.6912	1
7.7824	1
8.6784	1
0.512	1
22.9632	1
8.2944	1
208.64	1
0.128	1
3.1488	1
36.992	1
8.32	1
4.5056	1
1.28	1
7.7056	1
2.8928	1
6.656	1
0.5632	1
7.168	1
3.9168	1
6.4256	1
1.8688	1
10.0608	1
18.4832	1
11.3408	1
7.0912	1
5.2736	1
10.2144	1
3.5072	1
6.6816	1
0.4352	1
8.8576	1
8.576	1
25.5744	1
12.416	1
4.0192	1
9.2672	1
10.1376	1
7.4496	1
7.3472	1
6.6304	1
5.2736	1
7.2192	1
0.9216	1
2.4576	1
5.1968	1
3.2256	1
9.3952	1
5.9904	1
8.5248	1
5.5808	1
13.8496	1
6.5024	1
4.2496	1
0.3072	1
3.0464	1
1.0752	1
7.8848	1
0.5376	1
5.4784	1
8.1664	1
21.8368	1
5.504	1
9.4208	1
10.1888	1
4.0704	1
12.8512	1
21.7344	1
7.9616	1
0.0512	1
7.3728	1
10.112	1
7.1424	1
8.2688	1
0.0512	1
0.0512	1
6.1184	1
1.8176	1
1.9456	1
0.1536	1
1.4848	1
1.8176	1
3.84	1
11.52	1
31.6672	1
5.9136	1
17.4592	1
7.5264	1
4.096	1
4.7616	1
15.1808	1
5.0432	1
3.4048	1
1.9712	1
1.6128	1
0.9984	1
6.7328	1
3.84	1
5.888	1
5.76	1
16.7424	1
8.192	1
6.2208	1
8.2688	1
0.768	1
7.2448	1
0.9728	1
5.76	1
5.7088	1
7.8848	1
0.9728	1
5.0944	1
5.6832	1
7.7312	1
3.9936	1
3.968	1
3.8656	1
6.7584	1
9.984	1
99.0464	1
5.2224	1
4.992	1
7.9104	1
7.8592	1
7.3216	1
0.9472	1
7.296	1
5.8112	1
18.2016	1
10.7776	1
4.4544	1
8.2944	1
5.7088	1
3.8912	1
2.4064	1
3.9168	1
0.64	1
1.4848	1
0.6656	1
3.1744	1
5.3504	1
0.8448	1
8.2432	1
6.6304	1
13.6704	1
0.64	1
6.528	1
3.6096	1
4.2752	1
9.7536	1
4.0448	1
7.2448	1
9.9072	1
7.6544	1
5.9904	1
5.6576	1
10.3168	1
10.496	1
2.8928	1
8.7552	1
12.8	1
9.6768	1
7.168	1
4.5824	1
1.152	1
7.3728	1
0.384	1
7.6288	1
0.5632	1
4.0704	1
2.5856	1
5.1712	1
1.0496	1
0.64	1
1.024	1
1.7664	1
7.9616	1
3.8912	1
0.9984	1
0.64	1
1.0496	1
6.528	1
0.5376	1
181.376	1
12.544	1
2.3808	1
5.7856	1
193.741	1
9.7792	1
0.3584	1
5.9392	1
4.096	1
12.544	1
4.2752	1
9.6512	1
4.0704	1
3.7376	1
93.6192	1
0.1024	1
0.1792	1
0.0512	1
8.6272	1
0.6912	1
13.7472	1
3.0208	1
18.3552	1
6.1696	1
3.0464	1
12.1088	1
3.2768	1
3.328	1
10.6496	1
0.7168	1
0.3584	1
4.9664	1
0.5632	1
1.024	1
12.6208	1
5.376	1
0.8192	1
10.0352	1
29.184	1
3.328	1
1.9456	1
0.3328	1
4.7104	1
5.76	1
1.2288	1
3.2256	1
2.0736	1
0.768	1
1.1008	1
5.8112	1
5.2992	1
6.6048	1
0.5888	1
0.8192	1
12.3904	1
4.9408	1
9.0368	1
0.7936	1
10.9824	1
0.3072	1
26.2656	1
8.96	1
8.2688	1
17.2032	1
6.0928	1
5.376	1
7.5264	1
10.496	1
4.2496	1
0.5888	1
3.6096	1
16.256	1
1.2032	1
2.7648	1
4.3264	1
4.6848	1
0.0512	1
2.4832	1
43.264	1
5.8624	1
0.8448	1
14.1824	1
7.0144	1
4.4288	1
0.8704	1
0.1024	1
2.5344	1
6.144	1
4.8384	1
0.0768	1
117.043	1
9.6	1
[truncated: 43,267 more rows]

## Sheet: Fig 5 Supp 1B raw p putida
cell_area	repeat
4.992	1
2.176	1
2.0736	1
3.9424	1
4.5312	1
0.2048	1
9.8048	1
6.7584	1
1.7664	1
3.3792	1
1.9712	1
3.8144	1
15.0016	1
4.992	1
4.1728	1
5.4016	1
3.6864	1
3.9936	1
8.4992	1
3.4048	1
4.0704	1
7.2448	1
5.5552	1
6.016	1
4.4032	1
4.1984	1
3.2	1
5.6064	1
7.296	1
8.832	1
3.3792	1
2.8672	1
4.352	1
4.4544	1
4.7616	1
4.9664	1
5.632	1
2.816	1
3.84	1
6.6048	1
3.0208	1
5.0432	1
4.7616	1
4.5056	1
3.2768	1
1.8944	1
4.4544	1
4.608	1
4.4544	1
3.9936	1
5.5296	1
2.3808	1
6.4256	1
4.3776	1
3.0208	1
4.992	1
3.9168	1
3.1488	1
4.4544	1
1.0496	1
3.0464	1
2.6624	1
4.0192	1
3.456	1
1.024	1
2.1248	1
5.3248	1
5.5552	1
1.152	1
3.6608	1
1.1008	1
5.4528	1
2.5088	1
3.1488	1
3.4304	1
4.4032	1
1.7664	1
6.7584	1
3.5328	1
1.8176	1
1.5616	1
2.7904	1
4.6592	1
1.3056	1
5.3248	1
1.8688	1
1.7664	1
1.4592	1
1.3056	1
5.12	1
6.2464	1
4.1728	1
3.0208	1
7.6544	1
3.2256	1
3.6096	1
2.9952	1
2.432	1
4.7104	1
1.4336	1
5.4272	1
1.408	1
6.6048	1
6.5536	1
3.6864	1
3.2768	1
9.3184	1
2.1504	1
1.7664	1
1.664	1
17.5616	1
8.6272	1
4.5312	1
2.8416	1
4.6336	1
3.6864	1
2.5344	1
2.688	1
2.2784	1
8.6528	1
15.8976	1
3.712	1
5.8368	1
2.9952	1
2.4832	1
8.6784	1
3.0208	1
7.7568	1
11.6992	1
8.064	1
3.7888	1
6.4256	1
1.664	1
2.8928	1
3.5328	1
1.792	1
33.408	1
5.504	1
7.3728	1
1.5104	1
3.4816	1
6.3744	1
7.6288	1
6.3232	1
7.68	1
5.4272	1
3.3792	1
1.5872	1
5.248	1
6.0928	1
1.1264	1
2.7648	1
3.1488	1
4.3776	1
1.8432	1
1.9456	1
3.712	1
7.552	1
2.6112	1
5.0176	1
7.5776	1
6.7072	1
0.5888	1
3.328	1
2.4832	1
2.944	1
6.1952	1
12.5696	1
4.9408	1
6.6048	1
6.9376	1
3.6864	1
7.2192	1
4.4544	1
8.9856	1
3.3536	1
4.0704	1
4.992	1
4.3264	1
9.856	1
2.944	1
4.1984	1
15.0784	1
3.9936	1
2.3808	1
4.8384	1
5.888	1
3.9936	1
3.0208	1
3.5072	1
4.224	1
2.0224	1
5.2224	1
4.4288	1
5.76	1
4.7872	1
54.3744	1
3.6096	1
4.0192	1
3.0976	1
1.7152	1
1.9712	1
3.3536	1
3.456	1
1.7664	1
21.8368	1
7.6032	1
8.832	1
7.936	1
8.576	1
6.5536	1
0.1536	1
11.4432	1
4.1216	1
2.4064	1
2.048	1
5.0176	1
5.4272	1
2.304	1
8.3456	1
13.3632	1
1.4592	1
4.7872	1
27.7504	1
4.5824	1
4.992	1
4.7872	1
5.632	1
4.48	1
4.5568	1
7.0144	1
1.8432	1
8.6784	1
1.8688	1
5.0176	1
2.6368	1
5.8624	1
7.3728	1
9.1904	1
2.048	1
6.8096	1
3.3792	1
3.5072	1
4.3264	1
5.0688	1
8.6528	1
6.9376	1
6.8608	1
5.2224	1
6.9632	1
8.704	1
3.7632	1
12.4416	1
2.6624	1
4.1728	1
6.1952	1
5.2992	1
5.4784	1
2.7392	1
5.76	1
2.4832	1
5.1968	1
6.912	1
4.1216	1
2.7392	1
8.7552	1
7.0912	1
3.2	1
7.552	1
8.0128	1
3.6096	1
5.4016	1
4.3008	1
4.352	1
5.504	1
3.6608	1
6.0416	1
3.3536	1
5.1968	1
3.3536	1
3.968	1
4.0448	1
23.5264	1
3.2	1
6.272	1
3.5072	1
6.8352	1
6.0672	1
4.9152	1
3.1488	1
4.8128	1
11.2384	1
5.6576	1
11.904	1
6.1952	1
5.1456	1
3.8912	1
9.3184	1
7.4752	1
4.6592	1
3.968	1
5.504	1
5.4528	1
8.8064	1
5.4016	1
7.2192	1
3.2768	1
5.6064	1
4.3264	1
5.2992	1
5.5296	1
6.0416	1
4.0704	1
5.8624	1
3.072	1
5.504	1
8.064	1
5.2224	1
9.088	1
8.9856	1
19.2256	1
5.7088	1
4.6592	1
3.5328	1
5.3248	1
2.5088	1
2.6624	1
4.48	1
5.2992	1
3.6864	1
5.248	1
4.6592	1
8.3968	1
3.5584	1
3.1488	1
6.656	1
8.1408	1
4.9664	1
7.3728	1
4.2752	1
4.2496	1
4.8896	1
5.8624	1
5.0432	1
3.8144	1
4.0192	1
6.9632	1
3.072	1
3.3792	1
7.1168	1
15.5904	1
4.6336	1
8.704	1
5.4016	1
2.9184	1
2.0736	1
8.6016	1
6.1696	1
4.3776	1
4.4288	1
7.7824	1
4.608	1
8.2688	1
6.3232	1
7.0656	1
3.1232	1
7.6032	1
6.8352	1
7.3728	1
3.6096	1
4.48	1
6.016	1
4.3008	1
7.8848	1
4.096	1
18.944	1
5.3504	1
3.8656	1
3.3536	1
3.9424	1
5.7856	1
3.84	1
4.0192	1
4.0704	1
6.3488	1
4.4544	1
2.7136	1
4.8384	1
4.9408	1
5.0432	1
3.4304	1
3.3024	1
3.456	1
2.816	1
4.1216	1
4.4032	1
3.5584	1
9.1648	1
3.2	1
0.768	1
6.1696	1
4.1984	1
4.9152	1
10.112	1
10.5472	1
2.9696	1
2.3296	1
5.5808	1
8.6016	1
2.176	1
8.0384	1
0.2816	1
3.0464	1
5.6832	1
7.424	1
7.3984	1
17.9968	1
4.3008	1
7.7312	1
4.3008	1
14.0288	1
5.6832	1
7.4496	1
5.3504	1
6.2976	1
2.0736	1
4.7616	1
16.5888	1
7.9616	1
6.784	1
3.2256	1
4.2752	1
6.912	1
11.1872	1
4.0704	1
3.2512	1
2.0736	1
12.2624	1
3.1488	1
14.1312	1
3.6608	1
3.0976	1
5.504	1
6.3232	1
1.4848	1
7.2704	1
2.3296	1
0.512	1
1.92	1
0.0512	1
5.1968	1
1.664	1
5.4784	1
0.0512	1
5.632	1
3.4304	1
2.9184	1
1.4592	1
3.0976	1
3.7888	1
20.5056	1
2.3552	1
7.8848	1
2.048	1
6.0416	1
3.7632	1
5.9136	1
6.1952	1
1.9968	1
1.4336	1
12.9536	1
5.9904	1
5.248	1
19.7376	1
2.2272	1
2.5344	1
7.68	1
1.1776	1
0.1024	1
1.8176	1
1.5616	1
4.7104	1
4.48	1
2.6112	1
5.4016	1
2.3552	1
4.7872	1
9.3696	1
2.4064	1
4.1984	1
11.7248	1
6.0672	1
5.8112	1
6.2464	1
3.6864	1
4.4032	1
5.8368	1
3.8144	1
0.128	1
6.2464	1
5.9904	1
6.3488	1
0.0512	1
6.0928	1
0.1792	1
0.0768	1
15.488	1
2.7136	1
4.5056	1
8.2688	1
6.0416	1
8.2944	1
7.9104	1
3.7632	1
2.6112	1
4.1472	1
0.1536	1
3.8912	1
3.84	1
3.8912	1
6.6048	1
3.4816	1
9.2416	1
4.5056	1
4.6592	1
1.408	1
4.4544	1
5.0944	1
2.4064	1
7.2704	1
4.7616	1
12.7744	1
4.9152	1
4.9408	1
5.1456	1
3.1488	1
10.8032	1
7.6032	1
7.3472	1
7.9104	1
7.7568	1
3.1744	1
5.76	1
2.7904	1
4.864	1
7.0656	1
7.2704	1
4.9664	1
5.5808	1
5.7088	1
28.2624	1
3.9424	1
4.1472	1
4.8384	1
3.6352	1
6.1696	1
4.736	1
4.5568	1
7.2704	1
13.44	1
5.9648	1
13.2864	1
9.1136	1
13.696	1
4.1984	1
3.6352	1
3.6096	1
5.7344	1
8.3456	1
7.9872	1
4.6848	1
5.2736	1
3.584	1
7.9616	1
6.912	1
8.448	1
3.6096	1
1.5872	1
2.816	1
6.272	1
2.9184	1
8.2688	1
8.5248	1
7.9104	1
2.2272	1
6.5536	1
9.1392	1
3.4816	1
3.1488	1
0.0768	1
2.4576	1
3.7632	1
4.0704	1
7.9872	1
7.168	1
3.9168	1
3.4816	1
9.9584	1
5.1968	1
6.2464	1
5.632	1
1.2032	1
4.9408	1
3.8912	1
9.728	1
2.4832	1
6.4512	1
4.608	1
2.9184	1
4.3776	1
8.1408	1
4.3776	1
5.2224	1
30.0288	1
4.5312	1
3.4048	1
3.3024	1
1.8944	1
1.9968	1
9.1904	1
0.1024	1
3.0208	1
2.816	1
1.9712	1
10.9568	1
2.6112	1
7.2704	1
12.1344	1
8.9088	1
3.4304	1
6.5024	1
5.0176	1
4.4288	1
9.7024	1
13.2608	1
6.528	1
7.5264	1
3.5584	1
6.8352	1
6.5792	1
3.2	1
2.432	1
4.8128	1
5.0176	1
5.7344	1
2.6368	1
2.944	1
10.7264	1
4.0704	1
5.5552	1
7.3728	1
5.0944	1
3.7888	1
3.328	1
3.3024	1
5.12	1
10.4704	1
0.2304	1
4.8128	1
0.3072	1
2.688	1
5.9136	1
0.9728	1
3.5072	1
1.2288	1
5.4528	1
8.3968	1
6.2976	1
0.6912	1
0.4352	1
0.1536	1
2.56	1
0.0512	1
4.7616	1
5.9136	1
4.4544	1
1.1776	1
3.6608	1
6.9632	1
1.8432	1
0.2048	1
2.9696	1
8.9856	1
2.5344	1
4.48	1
3.5584	1
9.4208	1
4.0192	1
7.9616	1
6.1184	1
10.6496	1
6.2976	1
3.9936	1
1.9456	1
7.7056	1
2.176	1
3.5584	1
6.4768	1
9.216	1
7.0912	1
0.7424	1
0.8192	1
2.2272	1
7.4752	1
3.6096	1
5.7856	1
4.5824	1
3.1232	1
6.3744	1
1.92	1
41.6512	1
5.3248	1
11.3152	1
2.1248	1
0.4864	1
5.9392	1
6.0928	1
5.4016	1
5.504	1
3.5328	1
2.7904	1
2.6624	1
1.2544	1
3.7376	1
14.9248	1
8.0128	1
8.8064	1
6.7584	1
1.792	1
5.9648	1
1.7152	1
3.1488	1
6.9376	1
6.8864	1
9.3696	1
2.56	1
4.2752	1
8.6784	1
3.9168	1
3.1232	1
2.6368	1
11.648	1
2.9696	1
4.3776	1
0.4352	1
6.144	1
4.1216	1
9.984	1
1.6128	1
7.8848	1
3.0976	1
7.5008	1
8.448	1
5.8368	1
7.3728	1
1.0496	1
4.736	1
0.5632	1
0.0768	1
1.2032	1
2.2528	1
0.9472	1
0.3584	1
8.704	1
0.0512	1
2.304	1
3.9936	1
4.2496	1
4.1472	1
4.224	1
5.4784	1
19.1488	1
2.3808	1
1.7408	1
0.2048	1
3.5328	1
0.1792	1
0.0512	1
9.4208	1
3.3792	1
1.9456	1
2.2016	1
4.1216	1
4.352	1
6.1184	1
4.4544	1
5.504	1
6.0416	1
14.08	1
4.224	1
3.968	1
6.5024	1
10.2912	1
1.024	1
10.0096	1
5.1456	1
7.2192	1
3.584	1
3.2512	1
1.4592	1
2.2272	1
13.2096	1
9.728	1
6.0416	1
0.0512	1
5.504	1
0.8704	1
5.1456	1
1.536	1
0.0768	1
3.7376	1
4.9408	1
0.0768	1
1.8176	1
5.0176	1
0.896	1
6.016	1
1.1008	1
2.7392	1
3.968	1
4.4288	1
0.9728	1
3.968	1
2.6624	1
5.0944	1
20.7616	1
0.512	1
0.7936	1
0.9216	1
2.9696	1
0.7424	1
1.152	1
1.8944	1
0.6144	1
1.3056	1
2.56	1
11.9808	1
6.3488	1
8.7552	1
2.4832	1
3.072	1
2.9952	1
0.0768	1
4.7104	1
6.3232	1
5.9904	1
12.928	1
6.0416	1
4.6336	1
3.2256	1
1.4848	1
0.6912	1
0.5632	1
11.5968	1
4.2752	1
4.8128	1
0.256	1
1.1264	1
20.5312	1
1.7408	1
2.7648	1
2.9184	1
3.2256	1
0.4096	1
0.3584	1
5.4784	1
1.9712	1
7.168	1
8.3712	1
2.2528	1
5.7344	1
1.3824	1
1.9456	1
10.24	1
4.864	1
3.6608	1
3.0208	1
0.9472	1
4.0448	1
1.6384	1
2.2016	1
4.8384	1
3.072	1
5.6576	1
2.0736	1
9.8304	1
5.9392	1
0.512	1
0.4096	1
8.0128	1
0.8448	1
4.5056	1
5.1712	1
6.8352	1
4.2752	1
4.5312	1
3.3536	1
9.6512	1
5.6576	1
4.992	1
4.864	1
1.6896	1
8.1408	1
1.4336	1
11.264	1
8.1152	1
1.7664	1
4.608	1
2.0736	1
4.7872	1
3.0976	1
9.1392	1
2.688	1
1.6896	1
5.0944	1
1.7408	1
7.7312	1
4.9152	1
2.816	1
3.6096	1
0.8192	1
3.328	1
0.9216	1
1.5872	1
8.7296	1
0.8704	1
11.4944	1
6.1952	1
1.2032	1
1.7152	1
5.7088	1
1.3056	1
6.5024	1
1.6896	1
3.1744	1
1.152	1
5.3504	1
1.792	1
4.1984	1
6.016	1
3.3536	1
4.9408	1
4.864	1
6.5792	1
8.7808	1
11.8528	1
4.0448	1
8.8832	1
7.8592	1
3.8912	1
2.9952	1
5.6576	1
3.3792	1
5.0944	1
3.2256	1
5.2224	1
6.784	1
2.9952	1
5.2992	1
12.544	1
3.2768	1
4.6336	1
2.6112	1
7.6288	1
5.1968	1
5.76	1
9.1136	1
4.8384	1
6.1696	1
5.6832	1
7.2448	1
17.2032	1
5.0944	1
5.8624	1
5.9904	1
5.7856	1
4.4544	1
12.7232	1
3.5072	1
1.7664	1
4.9152	1
3.1488	1
9.8304	1
7.1936	1
3.1488	1
5.6576	1
3.8656	1
4.48	1
8.4224	1
5.0944	1
5.8624	1
4.7104	1
5.12	1
4.9152	1
5.632	1
5.76	1
4.48	1
2.5344	1
5.6576	1
6.912	1
7.1936	1
3.2768	1
4.9152	1
2.7136	1
6.8352	1
3.584	1
6.0928	1
6.7328	1
5.632	1
3.0976	1
3.0464	1
4.3008	1
4.0704	1
5.504	1
7.9872	1
11.1616	1
10.8544	1
8.6528	1
7.0144	1
5.0432	1
6.1952	1
5.4016	1
4.7104	1
6.528	1
2.0224	1
3.9168	1
5.376	1
4.736	1
10.1632	1
5.4272	1
6.912	1
10.7776	1
5.8624	1
4.224	1
6.7328	1
3.0464	1
0.0512	1
5.0688	1
4.48	1
4.1472	1
4.5824	1
6.7584	1
3.0208	1
3.4304	1
8.7296	1
3.8656	1
4.5568	1
5.0432	1
3.0208	1
4.2496	1
5.5552	1
4.7872	1
3.6864	1
3.7376	1
3.7888	1
3.7888	1
13.0304	1
3.072	1
7.8848	1
8.8832	1
4.5312	1
3.5584	1
7.1424	1
4.9408	1
8.8576	1
3.9424	1
4.736	1
5.7344	1
2.5088	1
15.0784	1
3.584	1
5.8112	1
4.2752	1
5.1968	1
11.6992	1
3.4048	1
9.088	1
3.7632	1
10.2656	1
6.7072	1
2.0736	1
5.376	1
8.9344	1
8.6528	1
9.7536	1
5.6576	1
4.7872	1
2.5088	1
3.1744	1
2.3296	1
3.712	1
4.4544	1
3.2256	1
2.56	1
4.736	1
5.376	1
3.968	1
2.8928	1
8.0384	1
6.1952	1
8.5504	1
4.0704	1
6.8608	1
4.6592	1
9.2928	1
4.736	1
5.0176	1
7.7056	1
6.3232	1
3.6608	1
5.7088	1
13.0816	1
15.0528	1
3.3536	1
5.4016	1
3.0976	1
6.1952	1
3.5072	1
4.0192	1
8.3456	1
5.1456	1
0.7424	1
6.9376	1
4.736	1
4.1216	1
3.0464	1
5.0688	1
5.1456	1
5.8624	1
3.9424	1
5.7088	1
1.3824	1
12.032	1
2.6624	1
1.5616	1
3.2768	1
13.4144	1
7.3472	1
2.8672	1
8.5248	1
5.5296	1
7.5264	1
12.1088	1
8.9088	1
2.9952	1
3.6608	1
4.8128	1
6.912	1
5.888	1
5.5808	1
4.4544	1
3.712	1
6.1952	1
4.9408	1
5.2736	1
7.0912	1
5.1456	1
4.5568	1
5.4528	1
21.1968	1
2.944	1
4.736	1
4.8128	1
1.1008	1
6.272	1
6.1696	1
2.4064	1
0.1536	1
0.0768	1
4.5312	1
5.5808	1
3.8656	1
8.7552	1
3.072	1
4.1728	1
10.368	1
3.1232	1
7.0144	1
3.7632	1
4.9408	1
5.5552	1
1.0752	1
6.2208	1
6.3232	1
2.56	1
5.2224	1
2.7904	1
7.4496	1
3.3536	1
11.0848	1
4.8896	1
8.2176	1
5.888	1
3.7376	1
4.8384	1
4.0192	1
6.4512	1
2.2528	1
5.1712	1
1.8944	1
5.4272	1
1.9456	1
0.0512	1
6.6304	1
3.7888	1
3.4304	1
1.0752	1
4.48	1
4.7872	1
2.4832	1
4.2752	1
0.1536	1
5.6576	1
3.5584	1
2.4064	1
4.5568	1
3.3792	1
6.9632	1
5.5296	1
3.9168	1
8.7296	1
5.4784	1
8.0384	1
5.9136	1
6.2976	1
6.8096	1
6.8096	1
8.1408	1
7.936	1
7.7824	1
0.3072	1
4.992	1
1.3824	1
7.04	1
3.3024	1
3.4816	1
10.496	1
2.5344	1
5.12	1
5.3504	1
2.3552	1
17.4848	1
6.016	1
10.6496	1
12.5696	1
12.16	1
4.1216	1
3.6352	1
4.1728	1
7.0656	1
7.1168	1
2.9952	1
3.5584	1
14.1056	1
0.6656	1
4.4032	1
7.8848	1
10.0864	1
5.4784	1
6.272	1
4.5312	1
3.456	1
3.3792	1
5.1968	1
3.6864	1
2.0224	1
0.9728	1
6.2208	1
0.1792	1
3.1488	1
3.4816	1
8.4224	1
5.0176	1
5.3248	1
9.1392	1
2.8928	1
5.5296	1
3.4304	1
2.6624	1
3.4816	1
3.7888	1
9.8816	1
3.4048	1
4.6592	1
5.7856	1
18.8672	1
10.5472	1
2.0992	1
2.304	1
7.7568	1
4.0704	1
7.296	1
3.0464	1
3.8912	1
12.3648	1
2.9696	1
3.4304	1
8.9344	1
1.664	1
4.864	1
4.9152	1
0.9728	1
6.7072	1
6.5792	1
7.936	1
4.1984	1
7.2192	1
11.008	1
8.7808	1
4.4288	1
5.7856	1
0.1024	1
0.1536	1
4.8128	1
3.072	1
5.2224	1
2.6368	1
7.8848	1
5.0432	1
6.1184	1
5.3504	1
5.248	1
14.6432	1
17.1008	1
4.7616	1
1.9456	1
4.9152	1
4.1984	1
2.9184	1
5.504	1
5.5296	1
6.528	1
7.8592	1
5.76	1
5.0688	1
6.9376	1
1.9712	1
14.5152	1
22.3744	1
2.304	1
2.176	1
2.432	1
3.9936	1
10.6496	1
3.7632	1
4.4032	1
8.7296	1
5.7856	1
11.4688	1
3.1488	1
7.552	1
4.2752	1
2.8928	1
6.9376	1
3.3792	1
4.224	1
3.0976	1
4.352	1
3.6864	1
8.3712	1
7.7568	1
4.6336	1
3.4048	1
5.12	1
3.4048	1
13.2608	1
6.3744	1
3.072	1
3.1488	1
4.0448	1
6.7328	1
5.5808	1
8.5248	1
11.5968	1
11.8272	1
4.0704	1
3.1232	1
4.7104	1
6.2976	1
6.8096	1
4.4288	1
4.8896	1
0.4864	1
2.5344	1
2.7904	1
4.5824	1
5.3504	1
5.5296	1
3.0208	1
6.4256	1
2.944	1
1.8944	1
5.3248	1
0.2816	1
5.8368	1
0.3072	1
5.6576	1
0.0768	1
4.608	1
5.6832	1
0.0768	1
2.432	1
8.5504	1
2.8672	1
5.5552	1
5.5808	1
2.5344	1
0.0512	1
0.3584	1
3.1232	1
4.992	1
2.1248	1
7.3472	1
4.608	1
3.4048	1
3.6608	1
6.3744	1
2.7648	1
0.1792	1
4.5056	1
5.0944	1
9.0112	1
5.376	1
3.3792	1
3.7632	1
0.0512	1
8.7296	1
8.192	1
2.7904	1
7.9616	1
4.352	1
4.608	1
0.1024	1
0.4352	1
4.7616	1
0.1536	1
0.9472	1
1.4592	1
0.0768	1
0.1024	1
1.024	1
1.9456	1
0.1024	1
0.0512	1
0.1536	1
14.08	1
0.1792	1
6.7072	1
0.0512	1
0.0512	1
0.9728	1
0.1792	1
0.0512	1
0.3584	1
6.9632	1
0.0512	1
2.3296	1
0.9984	1
8.0896	1
6.272	1
0.1536	1
0.1024	1
0.0512	1
7.04	1
0.0768	1
2.432	1
0.1024	1
0.2048	1
7.5776	1
0.1536	1
0.2304	1
0.0768	1
0.768	1
0.2304	1
0.2816	1
0.0512	1
3.072	1
3.9168	1
4.8896	1
0.0512	1
0.9728	1
0.0768	1
1.28	1
5.8112	1
0.256	1
0.3328	1
0.1536	1
3.5072	1
11.1616	1
0.3584	1
1.28	1
1.6384	1
0.128	1
0.128	1
0.2816	1
0.0512	1
0.8192	1
0.0512	1
0.0768	1
8.2432	1
0.0512	1
1.4592	1
0.1536	1
2.3296	1
3.0464	1
0.1792	1
5.4016	1
0.9728	1
0.0768	1
0.2048	1
0.7168	1
1.3056	1
2.2016	1
0.0512	1
5.5808	1
3.0464	1
3.1744	1
3.6608	1
5.4528	1
1.92	1
0.0512	1
6.272	1
11.6992	1
8.832	1
0.256	1
6.6304	1
4.736	1
3.0464	1
0.9216	1
0.0512	1
0.5376	1
0.0512	1
0.4096	1
0.1024	1
0.0512	1
0.2048	1
0.1024	1
2.7392	1
0.128	1
0.2304	1
0.3584	1
0.2816	1
0.0512	1
0.0512	1
0.128	1
1.9968	1
0.2048	1
2.6624	1
0.1792	1
0.3328	1
2.3552	1
2.8672	1
2.2528	1
0.0512	1
0.1024	1
5.248	1
0.1024	1
1.2288	1
0.2304	1
0.4608	1
1.5104	1
0.2048	1
1.3056	1
0.2048	1
0.6144	1
0.3072	1
0.6144	1
1.6128	1
0.256	1
9.3696	1
1.024	1
0.0512	1
0.4096	1
0.0512	1
0.128	1
0.1024	1
5.3504	1
0.0512	1
0.0768	1
2.176	1
0.4352	1
0.1024	1
4.8128	1
0.2304	1
0.0512	1
0.128	1
0.2048	1
0.3328	1
0.0512	1
0.0768	1
0.7936	1
5.888	1
4.9152	1
6.4256	1
0.0512	1
0.1024	1
2.048	1
0.5888	1
0.0512	1
4.864	1
0.3328	1
0.0768	1
0.1536	1
18.7904	1
0.9216	1
0.128	1
0.0512	1
0.0512	1
0.9216	1
0.2304	1
0.1792	1
0.256	1
0.3072	1
5.4528	1
0.0512	1
0.1792	1
0.0512	1
0.128	1
0.1536	1
2.6368	1
0.0512	1
5.1456	1
7.3984	1
16.9984	1
0.0512	1
0.0768	1
0.2048	1
0.1024	1
0.1792	1
0.0768	1
0.8704	1
0.1024	1
7.8336	1
0.128	1
4.0704	1
0.1792	1
0.2048	1
4.864	1
0.768	1
0.0768	1
11.6736	1
0.0512	1
0.0768	1
10.24	1
0.1536	1
0.2304	1
0.0768	1
0.1024	1
0.3328	1
0.1024	1
7.808	1
3.2512	1
0.7936	1
0.64	1
0.128	1
0.0768	1
0.3072	1
4.864	1
5.376	1
0.2304	1
0.1536	1
0.2304	1
9.344	1
0.5632	1
4.6592	1
6.272	1
0.3328	1
0.2048	1
2.7136	1
0.0512	1
0.3072	1
2.8672	1
0.384	1
3.4048	1
0.512	1
1.2288	1
5.0944	1
0.2304	1
0.5632	1
12.4672	1
9.1136	1
0.2048	1
4.8896	1
0.128	1
3.0464	1
0.9216	1
0.1792	1
1.1008	1
2.304	1
0.9728	1
0.0512	1
0.4608	1
3.4304	1
0.9728	1
0.0512	1
0.0512	1
0.3328	1
0.0512	1
1.4592	1
0.2816	1
7.8336	1
1.408	1
0.7424	1
0.4096	1
0.1536	1
0.1024	1
0.128	1
6.0928	1
0.1024	1
3.7632	1
10.9312	1
1.5872	1
1.28	1
0.3584	1
9.7792	1
5.1968	1
0.2048	1
2.048	1
10.0096	1
0.4608	1
0.1536	1
0.64	1
7.3216	1
0.2304	1
0.896	1
0.4864	1
0.1792	1
12.032	1
13.2096	1
12.9792	1
0.0512	1
0.384	1
0.5376	1
10.7264	1
1.664	1
1.0752	1
3.072	1
2.816	1
0.2816	1
0.8448	1
0.4352	1
0.5376	1
3.9936	1
1.92	1
0.0768	1
5.8368	1
5.1968	1
0.2816	1
1.4848	1
1.1776	1
0.3328	1
10.5472	1
7.5776	1
0.1024	1
1.5616	1
1.3568	1
0.1024	1
2.6624	1
0.8192	1
5.7856	1
6.8864	1
3.7376	1
1.3056	1
1.7152	1
1.5104	1
2.8672	1
3.328	1
0.8704	1
0.9984	1
0.7424	1
0.4608	1
0.1024	1
0.1536	1
8.1664	1
0.4608	1
2.6624	1
3.9424	1
0.1024	1
4.9664	1
1.7408	1
0.7936	1
0.5632	1
1.6128	1
5.9648	1
6.6304	1
22.2208	1
8.0896	1
3.0208	1
0.0768	1
4.3776	1
0.512	1
1.28	1
2.0736	1
5.3248	1
5.2224	1
12.1344	1
0.7168	1
4.48	1
5.2992	1
0.3584	1
2.816	1
4.0192	1
6.3232	1
3.1232	1
0.64	1
0.0768	1
3.0464	1
9.0624	1
0.512	1
0.128	1
9.1904	1
3.3792	1
0.8192	1
1.8944	1
0.1536	1
1.8432	1
0.3584	1
1.4592	1
1.5872	1
2.7904	1
1.8432	1
2.2528	1
8.0384	1
2.7392	1
5.6064	1
1.3568	1
0.8192	1
2.1504	1
9.1904	1
6.0672	1
4.48	1
5.5552	1
0.3584	1
8.192	1
0.9472	1
6.6048	1
2.6112	1
3.2256	1
5.1968	1
5.4784	1
2.944	1
2.816	1
3.6864	1
4.6336	1
1.8432	1
7.7312	1
8.8576	1
8.6016	1
2.2528	1
4.2752	1
2.2272	1
4.352	1
1.5872	1
10.112	1
8.5504	1
1.536	1
1.7152	1
3.2	1
3.1488	1
0.0768	1
1.9712	1
1.6384	1
2.2272	1
7.0912	1
4.096	1
2.6368	1
1.4592	1
1.9712	1
2.0736	1
5.0944	1
2.8672	1
3.2512	1
2.6368	1
2.2016	1
3.6864	1
7.4496	1
5.632	1
2.6624	1
5.8368	1
11.2128	1
5.8112	1
4.5312	1
4.8896	1
4.8128	1
2.2272	1
2.7648	1
4.736	1
5.9904	1
3.0208	1
4.0192	1
2.1248	1
1.9456	1
7.296	1
3.0464	1
1.4848	1
5.5808	1
5.7344	1
0.1792	1
13.4144	1
1.5104	1
0.2816	1
8.6016	1
8.576	1
0.128	1
1.5104	1
0.0768	1
0.9472	1
1.92	1
2.4832	1
0.0512	1
5.7344	1
0.2048	1
3.072	1
6.5536	1
5.0688	1
9.0112	1
0.896	1
9.4208	1
1.3312	1
2.0736	1
1.408	1
0.6912	1
5.2224	1
5.248	1
2.8416	1
0.2048	1
8.4224	1
0.5376	1
2.9184	1
0.2048	1
0.1024	1
0.1024	1
4.48	1
0.2816	1
1.4848	1
0.4352	1
0.5376	1
0.0512	1
0.2048	1
9.9584	1
0.6912	1
0.1536	1
0.2304	1
0.6656	1
0.7168	1
0.2304	1
2.3552	1
2.6112	1
0.1024	1
0.5632	1
0.1536	1
3.8656	1
9.088	1
2.5344	1
1.2288	1
0.0512	1
4.3264	1
0.256	1
0.2048	1
0.8448	1
0.3328	1
0.512	1
0.0512	1
0.2304	1
0.64	1
9.6512	1
1.92	1
0.2304	1
0.0512	1
1.1776	1
2.304	1
0.2048	1
0.0768	1
2.9696	1
8.96	1
1.3568	1
0.2304	1
0.1792	1
9.2416	1
0.0512	1
1.024	1
0.1024	1
0.3328	1
0.0768	1
7.552	1
2.3296	1
0.7168	1
3.0976	1
0.1536	1
1.3056	1
0.0768	1
0.64	1
0.0768	1
0.4864	1
0.256	1
0.0768	1
3.7376	1
0.4608	1
0.9472	1
[truncated: 33,371 more rows]

## Sheet: Fig 5 Supp 1B raw beads
cell_area	repeat
48.256	1
13.9264	1
12.7232	1
18.3552	1
47.2576	1
0.128	1
36.8128	1
43.9552	1
50.9952	1
26.5728	1
23.0912	1
22.7328	1
20.0192	1
17.0496	1
13.056	1
54.016	1
45.7472	1
13.4912	1
27.0336	1
24.32	1
27.3152	1
30.6432	1
20.48	1
12.8512	1
14.1568	1
43.3152	1
13.4912	1
64.2304	1
16.8192	1
14.976	1
54.1184	1
67.0464	1
9.9584	1
50.9952	1
39.552	1
14.4896	1
115.456	1
12.3648	1
27.648	1
14.72	1
33.8176	1
51.5584	1
11.4944	1
19.8912	1
40.7808	1
14.1568	1
22.8608	1
29.6448	1
32.128	1
20.2752	1
24.448	1
27.1104	1
8.0384	1
42.1632	1
14.6176	1
18.2016	1
29.824	1
20.9152	1
49.7664	1
24.3456	1
43.6224	1
55.5776	1
53.4784	1
49.1264	1
19.9424	1
13.9264	1
18.048	1
24.3968	1
60.2368	1
36.4288	1
21.888	1
20.096	1
13.312	1
18.2528	1
13.696	1
20.1728	1
19.7632	1
16	1
16.64	1
14.4896	1
62.5664	1
10.1888	1
44.8256	1
23.808	1
15.9744	1
31.8464	1
43.4944	1
25.6	1
21.6832	1
18.1248	1
17.7152	1
7.68	1
18.4832	1
29.0816	1
20.3008	1
16	1
25.5488	1
60.6208	1
10.7776	1
14.592	1
33.0752	1
18.3808	1
16.2816	1
13.1328	1
22.1184	1
57.344	1
25.6256	1
18.5856	1
25.6256	1
33.5872	1
27.2384	1
35.968	1
28.3392	1
11.136	1
86.9888	1
18.4832	1
22.0928	1
13.3888	1
25.984	1
54.1952	1
71.6544	1
20.992	1
7.7824	1
8.0896	1
14.7456	1
10.9056	1
33.6896	1
14.0288	1
34.4064	1
32.4864	1
32	1
47.616	1
57.1392	1
21.632	1
69.0944	1
12.288	1
24.2176	1
43.52	1
27.4176	1
12.0064	1
48.2304	1
31.616	1
13.9264	1
21.0432	1
17.7152	1
16.1792	1
17.8432	1
22.3744	1
24.0384	1
18.8928	1
18.6368	1
9.6768	1
15.0528	1
12.1856	1
16.4096	1
10.2656	1
27.6736	1
34.5856	1
56.9856	1
26.3936	1
29.2352	1
17.3056	1
26.5216	1
15.7696	1
34.4576	1
17.28	1
21.4784	1
105.882	1
43.904	1
25.6	1
22.4	1
45.952	1
32.4096	1
26.1376	1
11.3408	1
21.6064	1
12.3904	1
12.1856	1
54.4	1
40.6016	1
26.3424	1
17.7152	1
20.2752	1
29.7984	1
43.8272	1
44.9792	1
33.6896	1
18.3296	1
54.4	1
33.2032	1
23.5776	1
15.0528	1
16.0512	1
19.7888	1
18.9952	1
197.325	1
31.1808	1
19.968	1
39.6544	1
25.472	1
21.4528	1
5.4272	1
11.776	1
30.336	1
46.08	1
21.3504	1
37.2992	1
18.3808	1
37.7856	1
27.9808	1
36.0448	1
15.7184	1
23.68	1
16.7168	1
23.5776	1
13.3632	1
16.384	1
35.328	1
24.9856	1
50.2784	1
36.9664	1
25.2416	1
41.472	1
26.1888	1
13.2864	1
39.5008	1
15.8976	1
36.5824	1
21.0432	1
32.0768	1
14.3104	1
14.1824	1
16.3328	1
39.7824	1
16.512	1
16.8448	1
21.376	1
26.0096	1
32.7168	1
48.9216	1
21.6832	1
34.4064	1
11.2896	1
45.6192	1
51.9168	1
31.7184	1
23.7056	1
17.3568	1
52.6336	1
36.6848	1
18.7136	1
24.8576	1
27.4944	1
13.0048	1
13.056	1
38.5792	1
31.6672	1
26.4448	1
18.0992	1
19.8144	1
36.0704	1
14.336	1
103.091	1
12.2624	1
17.5104	1
13.0304	1
20.6336	1
20.736	1
26.4192	1
24.8064	1
34.7904	1
19.0208	1
32.7168	1
17.792	1
115.251	1
18.1248	1
25.984	1
32.2304	1
54.3744	1
33.152	1
70.1184	1
1.1264	1
23.8592	1
12.9536	1
33.28	1
40.704	1
13.0816	1
11.0592	1
75.4176	1
17.0496	1
17.4848	1
25.2928	1
26.88	1
21.5552	1
40.7296	1
14.08	1
21.6832	1
135.501	1
18.5088	1
96.8448	1
20.736	1
18.1504	1
36.864	1
48.9728	1
54.528	1
21.9136	1
39.168	1
14.2336	1
11.8528	1
50.9184	1
32.2816	1
24.8832	1
39.6032	1
13.1072	1
20.5568	1
45.1072	1
19.6096	1
46.1056	1
19.072	1
24.0896	1
66.7904	1
14.08	1
31.2064	1
18.0224	1
25.8048	1
41.0112	1
56.4224	1
20.5824	1
65.152	1
36.5568	1
24.832	1
14.08	1
7.4496	1
32.5376	1
51.8144	1
18.3296	1
12.6464	1
36.3776	1
30.1056	1
20.4032	1
22.4256	1
27.3664	1
42.752	1
16.0512	1
17.3056	1
19.072	1
12.2624	1
26.3936	1
49.4336	1
19.5584	1
24.7552	1
18.944	1
28.4928	1
57.1392	1
22.3488	1
21.5552	1
24.3456	1
18.7136	1
0.8448	1
10.9824	1
24.448	1
37.1712	1
12.8256	1
25.3184	1
33.9968	1
21.248	1
19.3024	1
28.3648	1
6.7072	1
11.0592	1
19.9424	1
26.8032	1
11.904	1
57.1136	1
30.5152	1
16.9472	1
34.432	1
18.6368	1
18.1248	1
0.0512	1
20.7104	1
15.3856	1
9.7024	1
59.4432	1
14.4896	1
13.7472	1
29.7216	1
49.2544	1
22.4256	1
14.5408	1
17.5616	1
25.6768	1
19.3024	1
21.9136	1
11.1104	1
24.0896	1
14.1312	1
20.4544	1
29.2352	1
18.5856	1
16.6912	1
36.0192	1
49.536	1
15.36	1
55.5776	1
14.3616	1
9.7024	1
6.1184	1
21.4784	1
54.8096	1
33.024	1
19.712	1
27.7504	1
22.784	1
54.3232	1
35.584	1
16.6656	1
45.4656	1
11.904	1
11.2128	1
15.3344	1
25.2416	1
31.872	1
23.9872	1
35.2512	1
30.5408	1
9.0368	1
34.9184	1
15.2576	1
47.616	1
13.2352	1
23.8592	1
30.3872	1
17.1264	1
28.288	1
3.5584	1
7.1936	1
21.0176	1
18.9952	1
18.2784	1
16.6144	1
25.3696	1
19.9424	1
19.6864	1
22.0672	1
12.5696	1
53.7856	1
42.8544	1
39.8336	1
61.0816	1
10.3936	1
7.7568	1
24.6272	1
19.1232	1
15.616	1
15.7952	1
13.0816	1
26.8032	1
13.44	1
25.0112	1
32.896	1
27.9808	1
20.736	1
23.296	1
13.5424	1
31.4624	1
11.2128	1
43.8784	1
19.2256	1
12.5952	1
18.9184	1
19.6352	1
13.8752	1
29.5936	1
39.04	1
19.0976	1
43.2128	1
36.4032	1
18.8672	1
32.3584	1
24.7808	1
20.0448	1
19.7632	1
47.8976	1
45.0048	1
58.7776	1
15.6416	1
15.9744	1
25.2672	1
14.208	1
26.9056	1
13.1584	1
38.9632	1
14.2848	1
17.1008	1
11.2128	1
2.0992	1
19.7888	1
12.544	1
21.8624	1
17.8176	1
1.5872	1
1.2544	1
30.5408	1
0.6144	1
1.2288	1
1.0752	1
18.7136	1
52.8896	1
19.0208	1
33.7152	1
27.9552	1
8.7296	1
18.7136	1
44.5696	1
14.9248	1
23.8592	1
18.9696	1
41.8816	1
28.3904	1
21.5296	1
57.4976	1
15.9744	1
0.8704	1
12.3648	1
17.024	1
5.1456	1
23.5008	1
43.1616	1
34.3296	1
18.9952	1
18.048	1
37.504	1
17.1264	1
48.3072	1
17.8944	1
101.53	1
20.1728	1
20.2496	1
14.976	1
18.2528	1
34.2784	1
11.3408	1
87.8848	1
10.4192	1
32.9472	1
25.344	1
33.408	1
20.2752	1
57.7792	1
20.4032	1
25.4208	1
33.8176	1
19.7632	1
19.712	1
14.592	1
10.0096	1
17.5872	1
30.3104	1
20.9408	1
12.9536	1
14.2592	1
17.9712	1
68.4032	1
27.392	1
31.1296	1
16.7168	1
71.3984	1
51.5584	1
35.0976	1
42.5216	1
53.3248	1
10.9824	1
19.4304	1
58.5984	1
26.0608	1
10.0352	1
38.5792	1
10.88	1
21.9392	1
20.5056	1
22.6048	1
21.9136	1
31.3856	1
31.2064	1
8.9088	1
40.32	1
8.7552	1
22.5792	1
15.36	1
41.2416	1
27.136	1
55.4752	1
35.1488	1
28.8768	1
22.3232	1
25.9328	1
47.36	1
35.0208	1
21.2224	1
23.296	1
77.4656	1
38.528	1
21.1968	1
34.304	1
19.0208	1
19.8656	1
12.0064	1
12.5696	1
79.36	1
31.488	1
19.4816	1
37.1712	1
13.696	1
83.5072	1
17.1264	1
11.264	1
3.0464	1
44.3904	1
72.7808	1
11.392	1
34.4832	1
21.6576	1
19.8656	1
15.6672	1
13.7472	1
13.4912	1
47.5904	1
32.256	1
26.752	1
26.2656	1
32.256	1
26.8544	1
24.4224	1
27.8272	1
18.432	1
20.3264	1
27.4944	1
21.1712	1
12.1344	1
18.7392	1
40.7296	1
20.7104	1
22.656	1
19.4816	1
16.7168	1
45.7216	1
30.464	1
20.224	1
49.408	1
30.336	1
38.8352	1
21.1968	1
46.8224	1
32.2048	1
22.4512	1
27.8784	1
20.4032	1
32.6656	1
26.5216	1
14.3872	1
85.0176	1
4.8384	1
33.536	1
33.28	1
43.9808	1
24.6528	1
35.328	1
30.1056	1
10.0608	1
34.944	1
66.432	1
31.8976	1
20.7872	1
42.9824	1
15.36	1
24.832	1
25.0112	1
30.0288	1
19.6352	1
14.0544	1
20.5824	1
38.7584	1
17.0496	1
40.5248	1
43.392	1
68.1472	1
38.5536	1
32.8192	1
12.5952	1
41.1392	1
56.6272	1
19.0464	1
30.8736	1
33.8944	1
11.3408	1
11.8272	1
53.4016	1
34.2528	1
9.7024	1
33.6128	1
13.4656	1
35.1232	1
26.0352	1
19.84	1
5.4784	1
46.5408	1
22.1952	1
13.9008	1
21.248	1
19.0976	1
25.2928	1
13.568	1
59.0592	1
20.5824	1
4.7872	1
19.6352	1
20.096	1
18.3296	1
17.536	1
28.3136	1
103.731	1
13.3376	1
19.7376	1
18.9696	1
60.6208	1
76.1856	1
21.7856	1
80.7936	1
51.6608	1
35.5072	1
17.28	1
63.3856	1
12.3648	1
24.7296	1
22.1696	1
34.688	1
16.1792	1
14.8736	1
35.456	1
30.5408	1
13.7728	1
13.44	1
70.7584	1
21.6576	1
31.4624	1
47.4112	1
15.5648	1
20.3008	1
20.3776	1
43.0336	1
12.9536	1
86.7072	1
20.7872	1
26.624	1
40.32	1
14.1312	1
43.1104	1
25.344	1
68.8384	1
15.7184	1
37.5296	1
36.2752	1
24.6784	1
24.9344	1
34.5344	1
16.3072	1
60.0576	1
14.3104	1
25.6768	1
20.992	1
17.664	1
39.8592	1
25.1904	1
27.9296	1
24.2944	1
32.4352	1
47.7184	1
27.0336	1
17.9456	1
23.68	1
45.952	1
16.8704	1
26.24	1
20.096	1
20.3264	1
36.8896	1
21.7088	1
18.7392	1
47.9232	1
21.4016	1
46.2848	1
11.0336	1
10.6752	1
15.0016	1
30.6944	1
54.1952	1
16.3072	1
37.8368	1
5.504	1
28.16	1
26.6752	1
34.5344	1
24.8064	1
30.464	1
32.0256	1
19.1744	1
26.624	1
11.9552	1
40.2688	1
49.4848	1
54.9632	1
30.2848	1
9.6	1
46.848	1
12.7488	1
30.0544	1
25.7792	1
32.6144	1
87.2448	1
24.6528	1
1.2032	1
23.9616	1
17.3056	1
17.1264	1
25.728	1
12.6464	1
32.7168	1
21.2992	1
11.0848	1
38.7328	1
12.9536	1
14.1056	1
53.9392	1
48.6144	1
19.5584	1
22.6304	1
12.2368	1
25.1392	1
13.4912	1
26.1888	1
26.3936	1
24.8576	1
43.9552	1
43.2128	1
65.2544	1
45.2864	1
16.8192	1
28.0832	1
23.7568	1
13.568	1
12.0064	1
24.4992	1
21.3504	1
20.3008	1
15.4624	1
64.1536	1
9.1392	1
19.8912	1
75.776	1
19.2512	1
23.2704	1
23.3472	1
63.232	1
18.7392	1
13.5936	1
49.024	1
17.2288	1
13.0304	1
107.162	1
21.504	1
10.2912	1
14.8224	1
13.3632	1
14.8736	1
22.7328	1
16.9728	1
23.9872	1
17.0496	1
37.376	1
34.0736	1
14.4128	1
26.24	1
43.9296	1
13.0816	1
15.7952	1
26.624	1
36.6848	1
26.0352	1
24.4736	1
39.0656	1
54.8352	1
26.1376	1
57.1648	1
10.88	1
33.1776	1
10.88	1
31.1808	1
84.5568	1
26.5728	1
19.2256	1
9.2928	1
25.1648	1
26.0096	1
25.9328	1
32.0512	1
23.0656	1
36.7616	1
21.6064	1
27.3664	1
64.6912	1
30.9504	1
45.824	1
19.9936	1
12.2624	1
13.952	1
18.5856	1
57.5744	1
49.3056	1
44.2368	1
25.3952	1
12.544	1
20.5568	1
19.712	1
48.5888	1
14.848	1
17.2032	1
12.7232	1
17.5616	1
23.0656	1
16.4096	1
15.5136	1
26.8288	1
13.568	1
13.5168	1
28.9024	1
49.152	1
19.9424	1
51.968	1
20.48	1
36.224	1
11.3664	1
47.0528	1
7.808	1
22.7584	1
26.2912	1
25.5488	1
51.7888	1
20.1984	1
9.8048	1
28.288	1
8.7296	1
24.704	1
20.6336	1
19.3792	1
13.184	1
35.3536	1
15.1552	1
31.104	1
26.5472	1
29.44	1
36.096	1
14.2592	1
50.048	1
16.3072	1
16.4608	1
29.5936	1
36.352	1
18.688	1
29.0048	1
20.9664	1
48.7168	1
19.9936	1
10.4448	1
20.7872	1
21.3504	1
30.464	1
18.432	1
43.0848	1
14.464	1
33.1008	1
26.3168	1
21.9392	1
45.0816	1
57.9584	1
19.1232	1
0.5376	1
17.2544	1
25.6	1
16.9472	1
9.3696	1
21.4528	1
51.6864	1
37.376	1
42.0352	1
22.8864	1
14.1824	1
19.8144	1
16.9216	1
35.6096	1
17.3568	1
24.9856	1
18.0224	1
14.7968	1
22.7072	1
22.6304	1
28.3392	1
24.2688	1
18.2272	1
23.3216	1
24.1664	1
29.2352	1
18.7136	1
23.9616	1
15.3344	1
18.8416	1
84.5568	1
29.7728	1
25.984	1
25.1648	1
18.0736	1
64.7936	1
22.656	1
11.2128	1
11.4688	1
26.8032	1
47.872	1
13.5936	1
28.8512	1
47.4112	1
65.4336	1
21.2224	1
20.0192	1
56.576	1
36.5568	1
20.608	1
16.64	1
74.8032	1
20.1216	1
6.8096	1
13.696	1
21.4016	1
34.9952	1
14.3104	1
21.632	1
27.5712	1
21.0176	1
37.1712	1
11.9296	1
44.8512	1
12.7744	1
18.432	1
23.8848	1
3.8912	1
40.3456	1
13.184	1
18.7136	1
12.6464	1
37.2992	1
45.1072	1
23.168	1
20.3008	1
12.288	1
23.9872	1
37.7344	1
32.5632	1
28.6464	1
32.64	1
32.1536	1
28.288	1
65.3056	1
56.2688	1
12.2368	1
24.7552	1
13.3888	1
12.9024	1
24.4224	1
7.3216	1
18.2784	1
24.2688	1
41.3696	1
28.2624	1
63.1296	1
18.4832	1
18.6368	1
16.3328	1
47.6928	1
19.968	1
28.16	1
33.3568	1
33.28	1
13.44	1
19.1232	1
18.3296	1
40.832	1
16.6912	1
20.4288	1
11.4944	1
24.5248	1
26.8032	1
12.6464	1
19.0208	1
14.6432	1
11.2896	1
4.3776	1
4.48	1
1.3824	1
0.4608	1
25.1904	2
9.8304	2
13.184	2
3.968	2
5.8368	2
15.7952	2
11.0848	2
15.6928	2
2.2784	2
25.2672	2
31.3344	2
15.36	2
2.5344	2
30.0032	2
17.92	2
10.7264	2
8.9344	2
20.608	2
14.5408	2
8.4224	2
80.896	2
14.1824	2
22.784	2
15.5136	2
22.9376	2
12.3136	2
28.032	2
23.3728	2
33.024	2
13.7216	2
17.4336	2
23.552	2
14.5664	2
25.3952	2
25.5488	2
13.2096	2
24.96	2
15.0784	2
25.7792	2
27.5456	2
20.096	2
41.8304	2
16.7424	2
24.9344	2
30.7968	2
12.3648	2
20.5056	2
14.976	2
34.304	2
12.9024	2
19.968	2
27.4432	2
23.0912	2
51.7376	2
27.3664	2
45.2608	2
22.9376	2
12.928	2
35.1488	2
31.8208	2
25.4464	2
3.8912	2
20.3264	2
40.0896	2
36.5568	2
20.5568	2
7.1168	2
50.0224	2
41.8304	2
11.1616	2
18.8416	2
29.2864	2
37.9136	2
29.3888	2
47.9744	2
26.1888	2
38.8096	2
39.7568	2
28.2624	2
8.4736	2
28.7488	2
20.2752	2
12.7232	2
67.9936	2
23.9616	2
27.52	2
13.0048	2
14.2592	2
27.4944	2
19.7376	2
13.2096	2
40.064	2
11.4944	2
27.648	2
33.6128	2
15.2576	2
77.2096	2
14.4896	2
16.5376	2
42.624	2
33.0496	2
20.5824	2
7.7824	2
41.4976	2
13.7728	2
40.6016	2
38.3744	2
25.1136	2
19.6864	2
14.1824	2
13.4144	2
20.4544	2
15.1296	2
27.3664	2
20.0192	2
26.1376	2
31.2832	2
37.1712	2
7.3728	2
50.3552	2
32.5376	2
30.08	2
36.5824	2
10.5216	2
28.1344	2
9.6256	2
41.1136	2
1.8688	2
14.592	2
19.6096	2
1.8432	2
0.9984	2
0.9472	2
24.96	2
20.1728	2
6.1952	2
15.616	2
41.7536	2
21.6064	2
14.4128	2
21.7088	2
15.9488	2
25.0368	2
48.9216	2
16.3584	2
2.0224	2
28.2112	2
11.1104	2
1.3056	2
4.8896	2
37.8112	2
9.6512	2
15.0016	2
41.2928	2
16.8192	2
12.1088	2
48.128	2
19.7888	2
33.536	2
26.9056	2
13.44	2
13.2864	2
21.8624	2
44.6208	2
18.6112	2
24.0896	2
41.856	2
74.9312	2
41.3952	2
10.9056	2
9.8048	2
33.4592	2
5.9648	2
25.8304	2
29.2096	2
15.5904	2
43.9296	2
35.2512	2
35.9168	2
15.1808	2
20.3008	2
0.4352	2
27.9552	2
15.872	2
28.3392	2
17.0752	2
7.1936	2
15.4112	2
40.7296	2
15.1808	2
25.3952	2
23.7056	2
51.8144	2
11.0592	2
20.1728	2
34.816	2
4.7616	2
25.0368	2
15.5648	2
14.0544	2
0.4608	2
9.984	2
7.9616	2
12.5184	2
0.384	2
0.0768	2
0.1536	2
1.5616	2
17.0752	2
11.5968	2
18.6368	2
6.9632	2
0.6656	2
7.808	2
15.5136	2
6.9376	2
9.344	2
33.7152	2
13.2096	2
32.9984	2
10.6496	2
1.2288	2
12.672	2
19.2512	2
11.8784	2
15.4368	2
4.3776	2
13.2864	2
39.5008	2
34.1248	2
34.1504	2
24.32	2
8.1664	2
27.4176	2
0.512	2
23.168	2
22.7584	2
0.1536	2
0.2048	2
0.3328	2
1.1776	2
19.2512	2
34.4832	2
15.6416	2
0.384	2
4.4032	2
18.5344	2
26.6752	2
1.3568	2
29.0304	2
9.9328	2
2.7648	2
0.8704	2
13.5424	2
1.8176	2
8.9344	2
1.5872	2
12.5696	2
43.0336	2
20.864	2
34.9184	2
1.7152	2
20.48	2
30.6432	2
1.5104	2
23.7568	2
21.4784	2
31.1808	2
21.8112	2
25.728	2
25.8304	2
22.5024	2
14.2336	2
11.8784	2
14.7456	2
13.0048	2
4.7616	2
48.6656	2
9.3696	2
8.7552	2
14.6944	2
14.6176	2
19.4816	2
32.5888	2
3.1744	2
9.0368	2
0.128	2
42.9056	2
1.1008	2
20.4544	2
11.52	2
12.2368	2
25.0368	2
11.648	2
5.9648	2
41.6256	2
18.2528	2
20.6336	2
8.3712	2
9.8816	2
40.1664	2
24.2176	2
26.4448	2
28.5184	2
50.2784	2
34.2272	2
39.424	2
17.0752	2
10.2656	2
16.4864	2
19.0464	2
18.8928	2
20.5568	2
13.2608	2
35.9424	2
7.168	2
39.5776	2
21.4016	2
16.4864	2
64.0256	2
27.648	2
9.8304	2
61.2352	2
18.8672	2
45.1584	2
24.2688	2
10.3424	2
23.3984	2
17.0752	2
12.0832	2
13.3888	2
19.1744	2
33.6896	2
25.856	2
26.8544	2
38.9888	2
16.1536	2
23.6288	2
14.9248	2
11.264	2
40.1152	2
12.8768	2
1.0496	2
32.7168	2
15.8464	2
16.768	2
26.8544	2
8.1664	2
26.5728	2
30.1824	2
0.8448	2
25.2928	2
44.6976	2
56.192	2
0.4608	2
21.4784	2
22.4768	2
25.7024	2
16.8448	2
7.7568	2
11.392	2
55.5776	2
18.7392	2
18.0992	2
12.8256	2
6.4	2
42.752	2
36.9664	2
12.4928	2
11.8272	2
0.6656	2
20.736	2
1.7664	2
1.92	2
2.3296	2
2.048	2
12.544	2
10.8288	2
0.8704	2
10.0096	2
21.7856	2
5.1968	2
32.1536	2
24.4224	2
1.1776	2
1.536	2
4.4288	2
0.3584	2
1.664	2
0.1024	2
2.7136	2
29.4656	2
17.6896	2
4.352	2
21.4016	2
18.4576	2
25.8816	2
15.4624	2
0.5888	2
0.3584	2
25.7792	2
39.808	2
14.0032	2
7.424	2
1.4336	2
0.384	2
57.4976	2
9.8304	2
0.1792	2
25.1648	2
14.8992	2
13.7472	2
17.024	2
16.9984	2
24.4992	2
15.1296	2
30.3104	2
10.2144	2
31.5648	2
13.2608	2
24.6784	2
4.9408	2
19.6096	2
6.656	2
16.128	2
24.32	2
4.5824	2
0.4864	2
20.5568	2
1.1776	2
40.7552	2
1.6384	2
33.2288	2
11.2384	2
6.0416	2
20.2496	2
0.3584	2
7.0912	2
18.9696	2
27.3664	2
2.0736	2
14.0544	2
2.1248	2
0.1024	2
0.4864	2
0.2304	2
1.2032	2
10.5728	2
19.0976	2
5.2736	2
1.8944	2
8.2176	2
1.6128	2
2.2272	2
19.84	2
1.0752	2
0.384	2
0.64	2
1.5616	2
8.9856	2
1.024	2
1.152	2
23.2192	2
0.512	2
0.6912	2
28.9792	2
0.0512	2
0.4608	2
9.1392	2
1.9456	2
9.8304	2
19.3536	2
4.9408	2
7.3728	2
3.3792	2
16.9728	2
69.4016	2
14.0544	2
18.2528	2
17.6896	2
14.1824	2
41.2672	2
56.3712	2
32.0768	2
15.488	2
22.272	2
11.3664	2
14.72	2
16.1792	2
18.7648	2
16.6656	2
19.5584	2
32.8448	2
35.4304	2
19.5072	2
10.5728	2
13.0816	2
18.8672	2
13.7728	2
27.4688	2
23.5008	2
13.2864	2
2.7648	2
1.152	2
3.8656	2
31.4112	2
0.896	2
15.5904	2
26.3936	2
1.28	2
25.6512	2
23.7824	2
18.944	2
0.1792	2
9.728	2
9.1136	2
14.4128	2
13.6448	2
4.48	2
5.7344	2
0.2048	2
59.3152	2
19.2	2
21.8112	2
1.7664	2
18.0992	2
16.5376	2
0.2048	2
12.8256	2
11.4176	2
0.8192	2
0.1792	2
0.8448	2
13.1584	2
26.0864	2
0.5888	2
7.7824	2
6.912	2
6.9376	2
18.7392	2
6.8608	2
2.2272	2
0.6912	2
2.6112	2
6.7584	2
1.5104	2
0.512	2
6.3488	2
0.896	2
1.3312	2
0.7936	2
0.2048	2
7.2704	2
0.4096	2
16	2
1.024	2
26.112	2
46.9504	2
0.9216	2
1.4592	2
0.4608	2
1.2544	2
10.1888	2
1.792	2
0.8448	2
38.1696	2
1.8432	2
14.592	2
0.1792	2
13.5424	2
0.5888	2
0.64	2
0.8704	2
0.9728	2
18.7648	2
0.512	2
4.3264	2
16.6144	2
11.2128	2
1.536	2
0.7424	2
0.5632	2
0.8448	2
2.1504	2
0.3072	2
0.0768	2
16.9984	2
14.464	2
0.9984	2
0.128	2
0.4864	2
7.7824	2
1.9712	2
0.4096	2
28.7488	2
1.92	2
2.5344	2
13.0816	2
0.128	2
11.3664	2
0.2816	2
0.6912	2
12.4928	2
21.9648	2
1.3312	2
1.7664	2
5.5552	2
9.344	2
6.2976	2
6.656	2
0.384	2
20.992	2
0.0768	2
0.2304	2
38.9376	2
31.0528	2
148.07	2
15.1808	2
17.9456	2
17.2544	2
15.2064	2
0.8704	2
14.0544	2
19.3024	2
14.7712	2
0.8192	2
15.0784	2
18.8928	2
1.3824	2
1.4848	2
0.1792	2
21.1456	2
6.8096	2
0.6144	2
2.816	2
1.6896	2
15.744	2
8.32	2
44.9024	2
1.3312	2
1.8176	2
11.7248	2
0.128	2
12.7232	2
1.9456	2
14.2592	2
14.4128	2
10.4448	2
18.6112	2
10.5216	2
0.6912	2
21.248	2
8.448	2
56.3712	2
23.8336	2
6.5024	2
14.2336	2
0.4864	2
7.7824	2
0.8192	2
4.2496	2
12.3648	2
10.496	2
0.7168	2
1.5616	2
0.0512	2
0.3328	2
14.976	2
11.6736	2
0.768	2
0.1792	2
1.6128	2
1.4592	2
1.5616	2
1.1008	2
2.1504	2
1.536	2
1.3568	2
51.8912	2
15.2832	2
0.4096	2
0.9728	2
0.0768	2
10.1632	2
0.1024	2
17.3312	2
13.0816	2
46.5152	2
8.2432	2
27.0592	2
33.4336	2
29.0048	2
11.4688	2
17.3824	2
0.128	2
1.5616	2
0.128	2
15.8464	2
1.28	2
0.2304	2
7.9872	2
6.4768	2
19.9168	2
23.3728	2
0.4352	2
0.8704	2
19.6096	2
8.0128	2
0.768	2
17.8432	2
4.8896	2
29.0816	2
15.1296	2
1.5616	2
0.9216	2
1.8176	2
18.816	2
2.0224	2
0.5632	2
10.9824	2
13.3632	2
19.7888	2
26.5984	2
9.2928	2
16.384	2
26.9824	2
24.8832	2
19.6864	2
30.9248	2
0.4096	2
7.8336	2
10.8544	2
26.3424	2
5.8112	2
16.128	2
11.776	2
24.8832	2
15.9488	2
40.704	2
3.6096	2
25.088	2
13.5936	2
0.9472	2
2.2016	2
21.0688	2
0.256	2
4.608	2
7.7824	2
18.2528	2
1.7664	2
20.6848	2
14.6688	2
0.9216	2
1.6384	2
0.8192	2
3.1744	2
3.4304	2
10.7264	2
9.856	2
42.2912	2
10.88	2
5.3248	2
14.2848	2
0.8704	2
17.2544	2
21.7856	2
12.6976	2
1.664	2
0.0512	2
17.5616	2
0.896	2
20.9408	2
0.2304	2
16.128	2
31.5648	2
17.5616	2
15.6928	2
15.5392	2
8.8064	2
0.0512	2
12.1344	2
0.64	2
1.5872	2
34.5344	2
0.5376	2
0.9728	2
17.4592	2
0.2816	2
27.8272	2
0.4608	2
18.6112	2
14.0288	2
11.136	2
10.2912	2
15.8208	2
25.6256	2
19.2768	2
22.7584	2
12.3136	2
22.5536	2
19.328	2
6.9888	2
7.168	2
24.8576	2
15.0784	2
11.392	2
4.2496	2
23.04	2
15.5136	2
9.7792	2
7.8848	2
16.3072	2
7.3984	2
7.1168	2
19.2512	2
2.7136	2
19.7888	2
25.9584	2
8.4992	2
0.128	2
12.2368	2
41.1904	2
2.9184	2
0.2304	2
2.6112	2
1.0752	2
4.6592	2
16.384	2
10.2656	2
13.5424	2
0.3584	2
1.152	2
1.2544	2
9.6512	2
18.9696	2
19.1488	2
0.5888	2
1.0752	2
1.0496	2
1.1776	2
0.6144	2
2.2528	2
0.1792	2
9.216	2
0.512	2
24.8064	2
7.5776	2
0.2048	2
16.9472	2
0.4096	2
21.1968	2
18.304	2
8.6272	2
23.9616	2
0.8192	2
6.8096	2
2.2528	2
15.488	2
6.8864	2
16.0256	2
0.9984	2
22.9888	2
23.2448	2
13.1072	2
38.7584	2
11.1104	2
32.4096	2
48.2048	2
11.9296	2
28.672	2
14.7712	2
13.0304	2
19.4048	2
10.9568	2
41.984	2
14.208	2
13.6192	2
29.7984	2
0.64	2
11.2128	2
34.176	2
1.6896	2
2.304	2
2.944	2
26.88	2
6.912	2
1.28	2
0.3328	2
4.4544	2
6.4256	2
0.384	2
[truncated: 8,101 more rows]
