# Supplementary material for: Bacterial survival in microscopic surface wetness
Source: eLife. 2019 Oct 15;8:e48508. doi: 10.7554/eLife.48508 (PMC6824842; doi:10.7554/eLife.48508)
Supplement: Figure 5—source data 1. — The droplet sizes are 100 evenly spaced (logarithmic scale) values between 101.5 μm2 and maximal droplet size. Raw data: droplets area μm2] vs inhabiting aggregate area [μm2] for aggregated P. fluorescens, solitary P. fluorescens, beads Figure 5B inset: Aggregate area distribution. Distribution bins are 45 evenly spaced (logarithmic scale) values between 10−0.5 μm2 and 104 μm2. [file elife-48508-fig5-data1.xlsx]

## Sheet: Figure 5B
p. fluorescens aggregated		p. fluorescens solitary		beads
droplet area [um^2]	fraction of population in larger droplets	droplet area [um^2]	fraction of population in larger droplets	droplet area [um^2]	fraction of population in larger droplets
31.6416	1	31.6416	1	31.6416	1
34.5768	0.968744	34.3462	0.980214	33.6842	0.98228
37.7843	0.934882	37.2819	0.954784	35.8587	0.955115
41.2894	0.900275	40.4686	0.920452	38.1736	0.926242
45.1196	0.867634	43.9277	0.877743	40.6379	0.893974
49.3051	0.838434	47.6824	0.830255	43.2612	0.868194
53.8789	0.80939	51.7581	0.773578	46.054	0.839142
58.8769	0.781142	56.1822	0.712088	49.027	0.809647
64.3386	0.754533	60.9843	0.653046	52.1919	0.779289
70.307	0.72822	66.197	0.596018	55.5612	0.747597
76.829	0.703884	71.8552	0.545882	59.1479	0.71775
83.956	0.67943	77.9971	0.499612	62.9662	0.68869
91.7442	0.658607	84.6639	0.456502	67.031	0.662816
100.255	0.638425	91.9006	0.416149	71.3582	0.635855
109.555	0.62109	99.7558	0.378613	75.9647	0.609011
119.718	0.605387	108.283	0.342414	80.8686	0.580712
130.823	0.590964	117.538	0.312045	86.0891	0.554462
142.959	0.580444	127.585	0.285752	91.6466	0.526174
156.221	0.566772	138.49	0.261666	97.5629	0.502873
170.712	0.556366	150.327	0.239167	103.861	0.478667
186.549	0.546116	163.177	0.220726	110.566	0.456861
203.854	0.53699	177.124	0.202006	117.703	0.434158
222.764	0.52795	192.264	0.187754	125.302	0.412443
243.429	0.519058	208.698	0.174507	133.391	0.398054
266.01	0.511374	226.537	0.165553	142.002	0.377988
290.687	0.50367	245.9	0.158543	151.169	0.360737
317.652	0.497959	266.918	0.150094	160.927	0.34974
347.119	0.490573	289.733	0.142824	171.316	0.339688
379.32	0.480142	314.498	0.136243	182.375	0.331128
414.507	0.471539	341.38	0.128442	194.148	0.320918
452.959	0.46158	370.56	0.119344	206.682	0.314374
494.977	0.449954	402.233	0.112764	220.024	0.30685
540.894	0.439441	436.615	0.107028	234.228	0.296509
591.07	0.428519	473.934	0.100243	249.348	0.287688
645.9	0.415468	514.444	0.0965728	265.445	0.280526
705.817	0.403851	558.416	0.0900006	282.581	0.274536
771.292	0.392863	606.147	0.0879443	300.823	0.266481
842.841	0.387186	657.958	0.0807627	320.242	0.262716
921.027	0.377206	714.197	0.0773995	340.916	0.253111
1006.47	0.363652	775.243	0.0726932	362.923	0.247933
1099.83	0.357044	841.508	0.071003	386.352	0.240911
1201.86	0.344789	913.436	0.0666598	411.293	0.235169
1313.35	0.329561	991.512	0.0620482	437.844	0.232572
1435.18	0.314856	1076.26	0.060339	466.109	0.225725
1568.31	0.300659	1168.26	0.0540728	496.199	0.219791
1713.8	0.280071	1268.11	0.0506983	528.231	0.21272
1872.78	0.263914	1376.51	0.0487047	562.331	0.204499
2046.5	0.248643	1494.16	0.0471092	598.632	0.201004
2236.35	0.237062	1621.88	0.0454314	637.277	0.187851
2443.8	0.22912	1760.51	0.0423677	678.416	0.181243
2670.5	0.20782	1910.99	0.0419635	722.211	0.175615
2918.23	0.194025	2074.33	0.0415022	768.834	0.170534
3188.94	0.185302	2251.64	0.0412198	818.466	0.164956
3484.76	0.176362	2444.09	0.0401282	871.302	0.159662
3808.02	0.163121	2653	0.0394107	927.549	0.155419
4161.27	0.155689	2879.77	0.0376517	987.427	0.153311
4547.29	0.127802	3125.92	0.0367734	1051.17	0.150119
4969.12	0.121933	3393.11	0.0348966	1119.03	0.146227
5430.07	0.118526	3683.14	0.0338837	1191.27	0.143172
5933.79	0.115216	3997.96	0.0333769	1268.17	0.138308
6484.24	0.106905	4339.68	0.0325162	1350.04	0.133905
7085.75	0.103938	4710.62	0.0318422	1437.19	0.12887
7743.06	0.100544	5113.26	0.0314631	1529.97	0.126401
8461.34	0.0964107	5550.32	0.029899	1628.73	0.121741
9246.25	0.0947856	6024.73	0.0294591	1733.88	0.11607
10104	0.0896033	6539.7	0.0292485	1845.81	0.100425
11041.3	0.0852819	7098.69	0.0290199	1964.96	0.0976505
12065.5	0.0815838	7705.45	0.0285346	2091.81	0.0946589
13184.8	0.0708741	8364.07	0.0278076	2226.85	0.0938288
14407.9	0.0677731	9079	0.0270186	2370.6	0.0853971
15744.4	0.0627587	9855.03	0.0250543	2523.64	0.082853
17204.9	0.0621588	10697.4	0.0234198	2686.55	0.0789609
18800.9	0.0618104	11611.8	0.0215503	2859.98	0.0753526
20545	0.0614296	12604.3	0.0214443	3044.61	0.0738183
22450.8	0.0610136	13681.6	0.0213292	3241.15	0.0728805
24533.5	0.0605589	14851.1	0.0212043	3450.38	0.0597969
26809.3	0.0600621	16120.5	0.0210687	3673.12	0.0568408
29296.3	0.0595191	17498.4	0.0209215	3910.24	0.0454972
32014	0.0591702	18994.1	0.0203783	4162.67	0.0451045
34983.7	0.0589271	20617.6	0.0188356	4431.39	0.0441926
38229	0.0586614	22379.9	0.017161	4717.46	0.042957
41775.3	0.0583711	24292.8	0.0149661	5021.99	0.0426167
45650.5	0.0580538	26369.3	0.012194	5346.19	0.0423775
49885.3	0.0577071	28623.2	0.00986032	5691.31	0.0415669
54512.9	0.0573282	31069.8	0.0096555	6058.71	0.0395174
59569.8	0.0569142	33725.5	0.00943318	6449.83	0.0382248
65095.8	0.0564618	36608.1	0.00919185	6866.2	0.0340197
71134.4	0.0549274	39737.2	0.00892989	7309.45	0.0325018
77733.1	0.0531489	43133.8	0.00864555	7781.31	0.0251134
84944	0.0512055	46820.7	0.0083369	8283.63	0.02443
92823.8	0.0490818	50822.7	0.00800186	8818.38	0.0235367
101435	0.046761	55166.8	0.00763819	9387.65	0.0229584
110844	0.044225	59882.2	0.00724344	9993.67	0.0226625
121127	0.0414537	65000.7	0.00681494	10638.8	0.0223475
132363	0.0384254	70556.6	0.00634982	11325.6	0.0222046
144641	0.0351161	76587.5	0.00584494	12056.7	0.0220804
158059	0.0314998	83133.8	0.00529691	12835.1	0.0219482
172721	0.0275481	90239.7	0.00470203	13663.6	0.0218075
188744	0.0232298	97953	0.00405631	14545.7	0.0216577
206253	0	106326	0	15484.7	0.0214983
206255	0	106328	0	15486.7	0

## Sheet: Figure 5B inset
log10(aggregate area [um^2])	Fraction of the population by area
	p. fluorescens aggregated	p. fluorescens solitary	beads
0	0.00227419	0.0023448	0.000148491
0.316228	0.000704864	0.000665273	6.89023e-05
0.398107	0.00107055	0.0009096	0.000160704
0.501187	0.0017615	0.00127781	0.000221363
0.630957	0.0027196	0.0022032	0.000356318
0.794328	0.00363403	0.00306267	0.000574729
1	0.00509216	0.00428774	0.000713551
1.25893	0.00709339	0.00661867	0.000896239
1.58489	0.011222	0.0107714	0.00104117
1.99526	0.0191123	0.0196988	0.000975115
2.51189	0.0284542	0.035133	0.000945499
3.16228	0.0443794	0.0628132	0.00130131
3.98107	0.0602728	0.104504	0.00240242
5.01187	0.079258	0.145921	0.00369162
6.30957	0.0861434	0.14684	0.00652944
7.94328	0.0754907	0.133547	0.0134127
10	0.0621009	0.113035	0.0267819
12.5893	0.0529936	0.0768645	0.0612586
15.8489	0.043141	0.0505929	0.0694059
19.9526	0.0389801	0.0306703	0.134851
25.1189	0.0291014	0.0179747	0.129692
31.6228	0.0223263	0.0118149	0.128466
39.8107	0.0184801	0.00408764	0.114188
50.1187	0.0194114	0.00321608	0.0911559
63.0957	0.0216072	0.00346494	0.0621528
79.4328	0.0287155	0.00284623	0.033758
100	0.0387318	0.00165453	0.0190523
125.893	0.0387265	0.000724055	0.0140003
158.489	0.0450594	0.000953274	0.00732237
199.526	0.0294314	0	0.00911098
251.189	0.0235636	0.00150277	0.00215673
316.228	0.0135376	0	0.0043953
398.107	0.00620738	0	0.00515974
501.187	0.0108936	0	0
630.957	0.00482839	0	0
794.328	0.00265538	0	0
1000	0.0102369	0	0
1258.93	0.00433103	0	0.0107741
1584.89	0.00625652	0	0.00725886
1995.26	0	0	0.00877258
2511.89	0	0	0.0103411
3162.28	0	0	0
3981.07	0	0	0.0165055
5011.87	0	0	0
6309.57	0	0	0
7943.28	0	0	0
10000	0	0	0

## Sheet: Fig 5B raw p fluorescens solita
droplet_area	population_area
7364.12	431.155
33.7408	4.5312
4.48	0
38.1952	4.992
16.5888	0
114.074	13.952
9.856	0.2048
24.704	2.0736
29.2096	3.9424
69.6832	6.7584
22.3232	0
162.893	16.768
47.7184	3.3792
54.2976	3.8144
72.3712	4.992
58.112	4.1728
63.5648	8.4992
71.168	5.4016
47.872	3.9936
53.6576	3.6864
44.8512	3.4048
61.1328	4.0704
75.2128	5.5552
74.2144	6.016
90.8288	10.4448
56.32	4.4032
67.3536	4.1984
57.216	5.6064
84.8896	8.832
78.08	7.296
58.7264	3.3792
107.315	12.1856
62.4384	4.4544
44.9024	4.7616
61.9264	3.84
65.4848	5.632
77.3376	6.6048
42.4192	2.816
59.3664	5.0432
47.1552	3.0208
53.6064	4.7616
54.912	4.5056
106.086	7.2704
48.9984	4.4544
33.7408	1.8944
61.696	4.608
147.994	12.672
115.149	8.8576
74.7008	5.5296
8.1152	0
72.9088	6.4256
58.4704	3.9168
57.4208	4.3776
60.288	4.992
37.6832	3.1488
9.2928	0
61.2096	4.0192
79.1808	9.9072
456.678	31.488
244.582	17.5104
124.774	9.984
55.68	3.1488
67.8144	6.7584
53.9136	3.5328
53.2736	4.4032
50.304	2.7904
66.4832	6.2464
91.9552	9.8304
83.6096	7.3984
77.3632	7.6544
48.384	3.6096
19.072	0
165.018	16.9984
75.6992	5.4272
74.4192	6.6048
75.8272	6.5536
89.216	8.6272
45.3376	3.2768
78.8736	7.3728
69.8624	4.6336
125.21	17.5616
57.6	4.5312
81.5104	5.5296
219.776	21.6832
118.349	15.8976
73.344	5.8368
64.512	3.712
87.9616	5.504
106.957	12.2112
90.88	11.6992
68.8384	6.4256
506.01	59.8528
46.9504	3.7888
56.7808	2.8928
74.6752	5.504
75.4176	7.3728
64.4096	6.3744
59.904	3.4816
80.8192	7.68
76.1856	7.6288
58.7264	6.3232
56.6528	5.4272
54.0672	3.3792
56.1664	5.248
52.096	3.1488
69.8112	6.3232
78.8736	3.712
64.2304	7.552
49.9456	2.6112
49.152	5.0176
81.6896	7.5776
74.88	6.7072
51.8656	3.9168
102.682	12.5696
48.896	2.944
70.3232	6.1952
47.0272	2.4832
62.0032	4.9408
69.8368	6.9376
70.4256	6.6048
53.8624	3.6864
83.6352	7.2192
58.1888	4.4544
132.352	13.312
61.696	4.0704
48.6912	3.3536
64.128	4.992
81.28	9.856
49.536	2.944
106.752	15.0784
56.2432	4.1984
59.7504	3.9936
43.9552	2.3808
71.9872	4.8384
122.291	9.9072
55.04	3.9936
53.1968	3.0208
58.9056	3.5072
75.5456	5.2224
63.6416	5.76
53.3504	4.4288
69.5552	4.7872
123.085	12.4416
54.2208	3.0976
76.5184	7.6032
74.9824	7.936
158.387	21.8624
73.6	6.5536
59.5968	4.1216
78.208	4.7104
81.024	5.0176
105.318	13.7728
7.296	0
3.6864	0
91.5456	9.2672
65.408	4.992
87.2448	9.1392
70.2208	5.632
45.2864	4.7872
93.6704	8.6784
141.338	5.8624
67.8656	7.0144
146.918	13.1072
62.8992	5.0176
42.24	2.6368
72.448	7.3728
70.4256	6.8096
64.6144	4.3264
58.496	3.5072
52.1216	3.3792
55.8336	5.0688
114.355	15.5392
75.8784	6.9376
55.7568	5.2224
75.008	8.704
95.3344	9.2416
70.912	6.9632
253.67	28.032
106.778	7.8848
3.8656	0
72.1408	6.1952
51.456	4.1728
52.736	5.2992
62.4384	5.1968
79.1296	6.912
53.7344	4.1216
96.4096	13.1328
92.544	11.8528
55.552	3.6096
40.1408	3.2
58.4192	5.4016
86.6048	6.0416
72.4736	8.0128
15.8976	0
62.592	5.504
55.2448	3.6608
51.2256	3.3536
65.536	5.1968
107.776	7.168
40.4736	3.3536
227.533	32.1536
51.4816	4.0448
61.2864	6.272
72.1152	6.8352
70.6304	0
55.6288	3.5072
72.064	6.0672
60.1856	4.9152
108.314	11.2384
100.019	9.344
55.9872	4.8128
101.197	11.904
65.2032	5.6576
54.656	5.1456
70.528	7.4752
57.856	3.8912
6.1184	0
62.8992	5.504
73.856	9.3184
2.688	0
53.5808	5.4528
88.448	8.8064
70.7328	7.2192
59.3664	5.4016
70.9632	5.6064
50.7648	5.2992
59.3664	4.3264
46.9248	3.2768
68.224	5.5296
61.2864	6.0416
16.384	0
52.8128	4.0704
62.7456	5.8624
43.0592	3.072
123.341	12.7232
54.2976	5.5296
6.7072	0
3.072	0
5.7856	0
6.8096	0
6.2464	0
62.848	5.2224
91.4176	9.088
78.5408	8.9856
70.4768	5.7088
36.5824	0
173.235	24.4736
49.792	3.5328
106.24	8.1664
58.5984	5.3248
39.0656	2.5088
59.1872	5.2992
60.288	4.6592
26.752	2.6624
58.0864	3.5584
72.0128	8.3968
39.7312	3.1488
75.2896	8.1408
71.1168	6.656
58.0096	4.9664
200.858	19.584
45.9008	4.2752
42.0352	4.2496
62.4896	4.8896
53.12	0
43.008	0
74.0608	5.8624
57.3952	5.0432
44.5952	0
2.8928	0
50.3296	3.072
66.7648	7.1168
155.085	18.7392
110.464	15.616
84.8128	8.704
48.4096	4.6336
65.6128	5.4016
503.885	67.5328
67.072	6.1696
103.834	12.2112
68.6592	7.7824
85.6832	8.2944
87.3728	7.0656
54.5792	3.1232
119.194	10.9312
65.7152	6.016
6.6816	0
52.8896	4.48
58.6496	4.3008
6.9632	0
44.9024	3.6096
57.8304	7.3728
7.5264	0
6.7584	0
73.4976	7.8848
65.5872	3.8656
5.3248	0
60.16	3.9424
106.906	7.1936
55.808	4.0192
62.3104	6.3488
55.7056	4.4544
74.1632	4.9408
48.9984	4.8384
65.92	5.0432
44.1856	3.4304
44.1088	2.816
61.6448	4.1216
87.4496	9.1648
44.5696	3.2
54.8096	4.1984
131.686	8.0384
60.8	5.6832
84.736	10.5472
57.1904	6.1696
82.6112	10.112
49.3312	2.9696
19.5072	0
102.221	10.9312
76.9792	5.5808
175.155	16.9984
50.3552	3.0464
71.8336	5.6832
12.5184	0.2816
123.904	18.0224
80.9216	7.7312
64.128	5.6832
146.918	17.28
56.6016	4.3008
66.304	7.4496
53.7088	4.3008
66.5856	5.3504
43.8784	2.0736
198.451	26.0352
52.7104	4.7616
78.7456	7.9616
91.1872	7.5008
77.1328	6.784
79.1552	11.1872
69.8368	6.912
5.2736	0
50.0736	4.0704
97.8176	12.2624
102.63	14.1312
625.715	80.7168
50.0224	3.6608
61.4912	5.504
94.592	13.5936
61.5424	5.1968
31.2832	1.4848
68.1472	5.4784
262.605	26.4448
22.9376	0.5632
57.0368	5.632
57.856	3.7888
36.5824	2.3552
148.557	15.8976
70.4256	6.1952
66.3552	5.9904
219.597	29.1072
63.36	7.68
3.6352	0
55.6544	5.4016
45.568	4.48
46.3104	4.7616
48.5888	4.1984
59.1872	6.0672
70.3744	6.2464
71.4752	5.8112
69.248	5.8368
46.7968	3.6864
104.115	10.496
45.696	3.8144
17.3824	0
57.9328	6.3488
75.6736	6.2464
69.0944	5.9904
253.03	4.608
10.6752	0.2304
110.208	9.216
67.1488	7.9104
209.152	22.4
70.3744	8.2944
49.6384	4.5056
112.384	14.8736
50.2784	3.7632
62.2848	4.1472
44.7232	3.8912
52.736	3.84
66.0992	9.2416
35.7632	3.4816
56.5504	4.6592
31.872	1.408
59.6224	5.0944
78.1312	7.2704
103.373	12.7744
58.9312	4.7616
54.8352	4.9152
91.2384	10.8032
62.5408	4.9408
58.5472	5.1456
53.4784	3.1488
78.848	7.6032
63.6672	7.3472
127.77	15.6672
50.048	3.1744
61.9264	5.76
57.8304	4.864
43.904	2.816
3.9424	0
13.3376	0
49.9968	5.5808
69.5808	7.0656
65.92	7.2704
53.6832	4.9664
98.3296	9.856
51.1744	3.9424
52.224	4.8384
53.4784	4.736
48.1792	3.6352
59.8016	6.1696
208.333	30.7456
64.9984	7.2704
73.1904	5.9648
86.8608	9.1136
50.3552	3.6352
54.016	4.1984
55.0656	5.7344
68.7616	7.9872
76.2368	8.3456
50.9184	4.6848
49.8688	5.2736
82.6624	7.9616
59.6736	5.1712
67.0976	6.912
47.9232	3.6096
139.802	11.264
89.5232	8.5248
16.896	0
101.248	8.2688
78.3616	7.9104
52.352	6.272
44.0832	2.9184
82.4832	6.5536
74.0608	9.1392
106.189	8.7552
56.2688	3.5584
43.4176	3.1488
46.7456	3.7632
75.2128	7.9872
82.5088	7.168
51.8912	3.9168
114.099	13.44
59.4944	5.1968
66.0224	5.632
85.7856	9.728
52.0448	6.2464
74.1632	4.9408
97.792	5.5808
273.28	40.6528
52.8896	3.8912
77.6704	6.4512
54.9632	4.608
43.0848	2.9184
64.4608	4.3776
50.9696	5.2224
61.0048	4.5312
48.8448	3.4048
470.963	48.896
7.2448	0
70.9888	9.1904
33.8688	3.4304
144.026	18.432
33.5616	3.0208
51.3024	8.9088
64.1536	4.4288
42.4704	5.0176
85.76	9.7024
104.397	13.2608
79.3088	6.528
80.3328	6.8352
57.1136	3.5584
50.7904	3.2
72.0384	5.0176
61.5424	4.8128
38.5024	6.5792
32.5376	2.6368
98.9952	10.7264
37.0176	2.944
3175.01	119.706
58.6496	5.0944
56.192	3.7888
34.6112	3.328
50.8928	5.12
226.125	21.2224
733.67	85.7088
70.8352	5.9136
3.7376	0
76.8768	8.3968
66.4064	4.7616
15.616	0.1792
65.9712	5.9136
80.8448	6.9632
17.1264	0
46.464	3.6608
22.784	1.3824
84.3008	5.1456
70.9632	6.1184
560	66.4064
62.9248	3.9936
71.296	6.4768
166.426	18.5856
49.152	3.5584
456.986	87.1936
68.1216	5.7856
135.322	15.7696
92.0064	11.3152
33.792	4.5824
64.9984	5.3248
59.4432	6.3744
63.6672	5.9392
67.1488	6.0928
100.454	8.8064
41.7792	5.504
36.4032	2.7904
58.5984	3.7376
66.2272	5.9648
150.4	14.5664
40.9088	4.2752
79.104	8.6784
121.984	11.648
53.6832	4.3776
46.72	6.144
80.6656	7.5008
31.6928	3.0976
57.0112	5.8368
16.5888	1.0752
87.1424	6.5024
22.9376	0.9984
71.168	8.704
48.8448	4.1472
56.4992	4.224
60.8512	5.4784
46.9504	2.3808
96.6912	9.4208
29.312	0
34.8672	3.5328
18.1248	0.4608
31.2576	3.3792
98.3552	7.7056
48.8448	4.1216
63.6928	4.352
394.65	59.2384
52.4544	6.0416
232.627	26.3424
78.2592	10.2912
64.4096	5.1456
64.4864	6.5024
7.8336	0
50.688	3.584
42.5984	3.2512
208.384	24.6784
63.7696	0
132.582	21.7856
21.632	0.256
22.5792	0
61.568	5.1456
46.0544	3.7376
79.5904	0
62.8736	4.4288
46.5664	2.7392
50.6112	2.6624
41.5744	5.0944
17.2288	1.152
66.7648	6.3488
166.144	17.664
68.1984	6.3232
24.4992	3.072
41.0112	6.0416
109.286	12.928
78.2592	11.5968
48.0512	3.2256
348.058	33.7408
93.5424	7.5008
49.5104	4.8128
51.8912	0
12.8	0
28.0576	0
80.512	8.3712
62.0544	5.4784
66.6624	7.168
16.7424	0
70.2976	10.24
62.4896	4.864
69.0688	3.6608
34.9952	3.0208
53.8112	4.0448
122.547	10.7776
30.6176	2.2016
92.8	9.8304
35.0208	2.0736
55.3216	8.0128
16.768	1.6384
55.8592	4.5056
18.4576	0
4.1216	0
52.6592	5.1712
67.9936	6.8352
122.086	3.3536
88.9088	9.6512
51.8144	4.5312
59.7504	4.2752
67.456	5.6576
98.6112	11.264
169.165	22.9376
110.208	12.5952
74.4448	8.1152
169.626	22.8608
73.7024	6.8864
52.5056	4.608
308.506	32.0512
42.9568	3.0976
64.6144	4.9152
51.584	3.328
76.3648	6.5024
48.9984	4.1984
49.4592	6.016
46.4384	3.3536
63.6928	4.9408
60.3136	4.864
71.1936	6.6048
87.4752	8.7808
3.6352	0
7.1424	0
5.504	0
82.8416	11.8528
2.6368	0
6.8608	0
5.7088	0
78.3104	8.8832
48.7424	4.0448
80.6912	7.8592
53.8368	3.8912
65.8944	5.6576
41.6256	2.9952
61.0304	5.0944
42.496	3.3792
16.8704	0
40.3456	3.2256
59.904	5.2224
65.0752	6.784
121.293	15.5392
83.8656	7.9104
48.5632	3.2768
91.648	10.8032
55.7568	5.1968
55.9616	5.76
75.4944	7.6288
57.8816	4.8384
70.9376	7.2448
102.835	11.6736
74.5216	9.1136
125.773	17.2032
51.0976	5.0944
202.854	20.1728
55.808	4.4544
49.536	5.7856
106.01	12.7232
60.3392	4.9152
60.16	3.5072
27.6992	1.7664
51.712	7.1936
67.8912	6.2976
62.208	5.6576
56.2944	3.8656
65.28	8.4224
54.2208	5.0944
62.976	5.8624
62.7456	5.632
64.0512	4.9152
53.2224	5.12
43.8272	4.7104
73.2672	5.76
51.2768	4.48
152.909	12.8512
70.9376	6.912
7.4496	0
6.7584	0
6.656	0
6.912	0
6.7072	0
49.792	3.2768
58.2656	4.9152
85.2992	5.8112
68.6336	5.632
46.8992	3.584
59.0336	6.8352
87.7824	9.1392
67.584	6.7328
145.894	15.4624
52.7104	4.0704
75.2128	7.9872
62.3872	5.504
51.6096	0
75.7248	10.8544
75.4432	8.6528
51.5072	7.0144
67.84	5.0432
70.0928	6.1952
63.1296	6.528
49.7408	5.4016
54.2208	4.7104
28.9024	2.0224
86.2976	8.6528
66.5088	5.376
77.9776	10.1632
10.9312	0.0256
55.5776	6.912
63.8976	5.4272
18.4576	0
93.2864	10.7776
25.8816	0.128
90.3424	8.704
59.4688	6.7328
53.12	5.0688
60.288	3.0464
82.4576	8.8832
18.7904	0
58.7264	4.1472
51.9936	4.5824
69.8624	6.7584
77.7216	8.7296
86.0928	7.2192
46.6944	4.5568
65.5104	5.0432
50.3808	3.8656
141.952	12.1088
34.1504	3.0208
114.944	11.5712
47.0272	3.7376
37.0432	5.5552
99.6608	13.0304
42.1888	3.7888
70.1696	8.8832
51.8656	4.5312
46.5408	3.5584
68.9408	7.1424
54.4	4.9408
53.5808	3.9424
137.651	23.936
63.5648	5.7344
43.9552	4.736
52.4032	3.584
30.6688	2.5088
60.5184	4.2752
61.2352	5.8112
135.731	15.4624
46.0032	5.1968
39.0656	3.4048
70.144	9.088
259.661	30.592
57.4464	6.7072
109.491	11.8272
62.2336	5.376
77.568	8.9344
83.5328	7.9872
3.3792	0
57.216	4.7872
33.0752	2.56
41.5744	3.1744
29.0048	2.5088
54.7328	4.4544
111.002	8.704
44.2624	2.8928
55.168	5.376
93.7984	14.8992
64.3584	8.5504
74.9824	9.2928
48.0768	6.1952
55.1168	4.6592
79.7952	7.7056
57.2928	5.0176
75.9552	6.3232
31.6672	4.0704
44.2624	3.6608
62.8736	5.7088
233.37	23.9872
102.554	15.0528
60.1088	3.3536
69.4528	5.4016
62.6432	6.1952
43.008	3.5072
147.174	14.208
59.9552	5.1456
61.8752	6.9376
58.4192	4.1216
61.1584	4.736
52.1472	5.0688
48.3584	5.1456
52.8384	3.9424
177.101	20.7616
48.0768	5.7088
13.0048	1.3824
99.1232	12.032
155.213	18.048
10.24	0
20.9408	1.5872
56.7808	2.8672
125.85	12.9792
59.904	5.5296
93.7472	11.1872
106.573	8.9088
45.8752	2.9952
49.6128	4.8128
114.714	12.0576
58.4704	5.5808
57.216	5.888
69.8368	4.9408
55.2192	3.712
57.344	6.1952
33.4848	0
63.36	5.2736
73.1648	7.0912
60.8768	5.4528
42.9056	4.5568
111.872	21.1968
241.306	15.8208
46.6432	4.8128
64.6912	6.272
30.0032	1.3312
62.08	6.1696
48.6144	4.5312
9.4976	0
100.813	8.704
82.432	7.6544
58.8288	4.1728
11.9552	0
105.216	10.368
124.595	14.976
122.854	11.904
105.165	10.7776
122.214	10.8288
46.5408	2.56
75.9552	7.4496
39.04	2.7904
37.8112	3.3536
254.054	21.504
86.8096	8.2176
49.1776	3.7376
65.7152	4.0192
60.0064	4.8384
77.824	6.4512
49.8432	5.1712
68.5056	5.4272
73.4464	6.6304
3.456	0
30.8224	1.9456
50.0736	3.4304
13.2352	1.1264
63.3088	4.48
57.1904	4.7872
71.2448	5.6576
46.4128	4.2752
18.688	0.1536
69.2736	2.4064
52.1472	3.5584
135.962	11.3664
98.56	9.6768
81.3824	6.9632
65.2032	5.5296
52.7104	3.9168
67.1744	8.7296
127.104	13.44
62.0032	8.0384
59.4944	5.9136
75.0848	6.8096
69.9904	7.7824
79.7184	8.1408
61.1072	4.992
22.6304	1.7152
104.474	10.496
53.9904	3.3024
69.6064	7.04
8.4992	0
38.7584	3.4816
83.7376	2.5344
73.8816	5.3504
69.7856	5.12
130.099	17.4848
72.832	5.3504
87.3984	10.6496
61.7728	6.016
157.133	21.248
78.1312	12.16
50.7136	3.6352
61.5168	4.1728
54.528	4.1216
61.184	3.5584
74.88	7.1168
76.1344	7.0656
121.856	14.1056
68.9408	4.608
74.368	6.272
88.0384	10.0864
47.9744	4.5312
45.2864	3.3792
49.152	5.1968
117.35	10.8032
40.3968	3.456
110.387	2.9952
121.19	16.4608
79.2576	8.4224
97.0496	9.1392
50.2528	3.4816
61.8752	5.0176
61.2096	6.2208
25.344	3.1744
70.1952	5.5296
41.9584	3.4304
41.3696	3.4816
54.7072	3.7888
36.5056	2.6624
50.7136	3.4048
58.8288	4.6592
66.0736	5.7856
168.499	22.8352
98.688	10.5472
237.67	28.8256
53.4016	2.304
134.477	14.464
52.48	4.0704
70.1184	7.296
53.2224	3.8912
43.0592	3.4304
82.6112	8.9344
74.24	6.7072
104.909	12.1344
82.0736	8.7808
172.595	16.256
72.8576	7.2192
80.9728	10.2144
26.112	0.2816
62.6688	4.8128
78.0032	8.1152
77.568	6.1184
56.1152	2.6368
114.202	10.7264
72.9344	7.8848
65.0496	5.3504
100.378	14.6432
127.36	17.1008
88.9088	7.68
59.6736	4.9152
36.1216	1.9456
68.2752	4.1984
67.7888	6.528
63.488	5.5296
88.1408	7.8592
50.6624	5.76
100.275	6.4512
61.9264	5.0688
128.589	6.4256
63.0784	6.9376
96.6656	14.5152
167.04	22.3744
80.7168	10.6496
57.1904	4.4032
69.0944	5.7856
94.2592	11.4688
89.344	8.7296
56.2432	3.7632
54.912	3.1488
57.5488	4.2752
51.5328	2.8928
265.267	35.072
78.0288	6.9376
109.158	11.9808
50.2016	3.6864
295.603	26.5216
83.9424	8.3712
54.2976	5.12
30.2336	0.0256
52.7104	3.4048
74.3168	6.3744
49.536	3.072
81.664	6.7328
95.4368	11.8272
51.6864	5.5808
83.2512	8.5248
61.8752	4.0704
141.926	11.4944
68.1472	6.2976
69.12	6.8096
1788.54	55.8592
124.902	11.1616
68.4032	5.3504
57.728	6.4256
55.1424	5.3248
47.7184	2.944
72.96	5.6576
79.6416	8.5504
65.2544	5.6832
40.832	2.8672
38.0928	2.432
120.09	9.9328
470.758	45.0304
31.4624	2.5344
60.3904	4.992
49.3824	3.4048
72.0896	4.608
50.8672	3.6608
115.507	15.1296
60.6976	4.5056
71.8336	5.0944
72.0896	9.0112
52.096	2.7648
660.557	63.0784
66.8416	7.9616
61.9264	3.7376
32.9472	4.608
190.746	18.048
131.891	10.4704
73.1136	6.7072
67.3536	6.272
10.24	0
270.029	24.2688
1717.63	140.186
52.992	5.8112
27.5968	1.28
41.6	0.9728
50.0992	5.4016
59.136	5.5808
36.8128	1.3056
49.9968	3.0464
32.9728	3.1744
70.7072	5.4528
59.6224	4.736
62.8736	6.272
101.965	11.6992
74.24	6.6304
52.2496	3.0464
100.506	7.9872
184.986	15.2832
31.8976	2.8672
90.368	9.3696
27.2384	0.512
238.131	35.8144
65.0752	6.4256
55.4752	4.864
116.403	15.232
55.1168	5.4528
47.0784	2.6368
85.4528	11.6736
59.1104	4.864
89.8304	7.808
56.2944	4.0704
38.8608	3.2512
62.2336	4.6592
49.7152	5.376
52.1472	6.272
74.496	7.9104
31.6416	2.7136
39.0912	3.4048
70.5792	5.0944
62.592	4.8896
109.798	12.4672
83.8912	9.1136
130.355	12.3136
48.8448	1.1008
71.0656	7.8336
128.179	19.072
46.4384	3.7632
66.9184	5.1968
79.8208	7.3216
82.5856	9.7792
70.5536	10.7264
17.7664	1.664
331.443	39.5776
2.6368	0
75.9552	5.9136
38.3488	2.816
5.2736	0
6.7584	0
5.4272	0
7.1424	0
108.698	9.3696
48.2304	5.8368
6.6816	0
128.051	12.2624
68.9664	7.5776
55.8592	3.7376
28.8768	1.5616
46.2848	3.328
109.798	13.9008
65.9456	2.2272
34.7392	2.8672
112.998	9.6512
102.656	9.4464
60.1344	8.1664
44.032	3.9424
34.816	1.1776
46.8736	2.6624
71.6544	5.9648
198.298	17.6896
61.2352	5.2224
48.4352	5.3248
82.8672	12.1344
71.7824	6.3232
46.592	4.0192
43.7248	3.1232
66.6368	9.1904
206.899	21.9904
41.0624	3.3792
122.829	12.3392
59.9296	8.0384
399.206	30.4896
71.9104	6.016
345.498	31.2576
87.2192	9.1904
59.392	5.6064
27.1872	1.5872
151.526	10.4448
61.0816	6.6048
61.056	6.0672
66.4064	4.8384
60.8768	7.7312
70.9632	8.8576
42.3936	3.6864
46.5152	2.944
176.154	14.3104
33.8432	1.8432
49.28	4.2752
64.768	5.0432
36.224	3.2
64.1536	7.0912
76.9024	7.8592
55.9104	5.0944
27.008	2.0736
42.7776	2.8672
628.352	54.272
48.9216	3.6864
71.2704	13.8496
60.4928	5.8112
57.088	4.8896
70.3232	5.632
47.232	4.5312
51.6096	4.736
28.4672	2.2016
29.7728	2.6624
46.08	5.9904
43.1872	3.0208
24.8576	2.7648
93.2608	15.872
137.882	11.4176
30.3616	2.1248
132.992	22.4512
87.808	8.6016
23312.5	1143.73
54.8864	5.0688
54.9376	6.5792
62.9248	5.7344
26.5472	2.4832
84.7872	7.7312
67.8656	5.2224
62.72	5.248
99.5584	9.9584
22.5536	1.5872
37.4272	2.8416
7.0656	0
59.136	5.0688
58.9312	3.8656
6.656	0
7.1936	0
5.8624	0
6.3488	0
46.4384	4.3264
25.9072	0.8704
28.3904	0.6144
76.4672	9.6512
80.4608	8.96
40.448	4.224
67.0976	9.2416
22.528	1.3568
77.568	7.552
44.3392	3.7376
23.7312	2.3296
61.3888	5.6064
47.8208	4.48
100.301	0
182.093	23.5776
76.288	7.04
118.989	10.0864
39.2192	3.5072
71.296	5.7344
81.28	9.9328
17.6896	2.0992
74.88	5.7088
38.8096	2.5344
209.997	29.056
469.12	42.7776
64.3072	8.3712
67.6352	5.4528
48.0768	6.1952
2.8928	0
54.6048	5.1968
112.896	7.9616
45.3376	6.0928
66.6624	6.7584
75.9552	7.6544
64.4352	5.5296
112.922	10.0864
33.792	2.6624
25.1904	1.536
51.5072	5.8112
22.6048	0.6912
33.152	2.4832
27.8528	1.5104
11.3664	0.0512
66.944	8.6016
183.347	24.1152
73.984	7.2448
78.2336	10.624
97.7152	10.112
25.472	0.8192
30.4896	3.3792
122.803	12.5952
51.5328	6.4512
6.3744	0
53.8112	5.504
52.1472	6.0416
55.0656	4.9664
55.9104	5.1456
74.3168	6.8096
39.3728	2.7136
45.1584	3.0464
62.976	5.4784
62.5152	5.504
87.808	10.496
146.15	13.568
90.4448	8.448
59.904	9.0624
856.32	32.128
66.2016	5.5552
74.6496	7.3216
47.1296	3.7632
38.3488	2.688
45.2864	5.0688
31.9744	2.4064
64.896	5.7344
60.8256	7.0144
18.3808	0
29.4144	0.8192
79.2064	7.6544
77.056	7.7312
96.896	17.3568
190.822	27.0848
201.907	18.4832
41.856	2.8416
74.496	6.4512
102.067	10.9824
50.048	2.6112
21.1968	2.2272
64.4096	9.3696
84.4544	9.0624
51.6608	11.4688
81.0752	7.1424
31.9232	3.1488
129.51	15.2576
120.96	11.3152
44.5696	3.584
68.4544	5.5552
56.2944	5.1968
70.5024	6.2976
105.267	8.576
99.968	9.7024
434.33	35.584
41.6768	3.9424
117.939	13.6448
146.483	14.1056
30.1312	1.7152
46.5408	7.68
54.5792	4.5824
67.2	5.2224
21.8368	2.0992
83.8912	7.168
41.5488	3.9424
96.0256	8.8576
60.3136	6.0672
55.0656	3.84
67.5072	6.9632
47.2064	3.0208
47.0272	4.1472
50.8416	3.6608
131.354	9.5744
27.0592	2.7392
82.8416	6.3232
126.592	13.44
124.032	14.7456
47.9232	4.2752
52.8128	4.0704
74.1632	3.84
51.328	3.8144
77.8752	8.064
46.4896	5.0944
80.9984	7.296
67.2512	7.3984
63.9744	7.7568
64.896	6.1696
57.9072	5.0944
55.7056	5.2736
42.9312	2.304
56.8832	5.6832
78.9504	8.192
11.4688	0
62.4896	6.6048
74.8032	7.296
59.8528	5.4272
72.832	7.0912
65.2288	5.9648
69.248	7.424
87.9616	9.1392
139.034	13.2096
58.6496	5.3248
46.208	6.2976
167.526	15.6672
72.1408	8.6016
32.768	4.2752
60.2112	4.48
65.4848	6.656
103.757	9.3184
37.4016	3.4816
61.3888	4.992
53.5296	7.808
57.4208	7.808
15.744	0.256
70.6304	5.0176
33.2288	2.6112
50.2528	4.8128
77.8496	9.2416
63.3088	4.5824
86.7072	9.3952
91.8272	8.3712
59.0848	4.1984
719.13	19.3536
71.0144	5.7344
50.9696	4.4288
64.7168	6.1696
58.5728	5.9904
48.4096	4.9664
62.3616	3.8912
45.0048	3.9168
58.24	5.8368
86.1184	7.9104
66.3808	4.1216
19.328	1.28
80.9216	8.0384
60.8	10.4704
71.3984	10.0096
85.632	7.5008
57.8304	6.6048
152.346	13.3888
35.6096	2.688
119.27	11.264
29.8752	1.9968
56.4992	6.528
19.9936	0
53.7344	5.5296
65.5616	3.84
27.392	1.2544
72.064	5.6832
81.4848	6.1952
30.2848	5.1712
89.4208	10.1376
78.9504	7.7568
52.8896	3.0464
47.6416	3.2768
23.3472	0
160.026	22.1952
58.5984	5.7856
63.5648	3.3024
48.6144	5.376
69.0688	6.1696
78.9504	9.216
120.294	12.8256
60.9536	5.12
39.8592	3.712
64.128	6.7584
48.4352	0.3072
80.8448	3.712
74.5472	10.1888
54.6816	4.4544
48.768	3.0464
28.5696	1.28
63.1552	5.8112
60.6208	6.528
46.9248	3.5072
49.28	3.4816
57.1904	5.2736
64.2304	5.0176
65.92	7.168
45.2352	3.6864
83.4304	6.5536
65.8944	6.6816
69.376	6.4768
52.1728	3.8144
70.784	7.4752
44.1856	3.9936
50.816	4.4032
55.7312	3.7376
38.7584	2.9184
33.024	1.5104
58.496	5.7344
137.114	18.688
74.24	6.8864
66.5344	4.5824
57.2928	3.9168
115.789	14.1056
72.704	6.3744
90.3936	7.9104
12.5952	0
62.976	4.1216
45.7728	6.1696
103.27	8.0128
64.7168	5.6832
12.928	0
61.824	9.8304
51.5584	4.6848
54.0416	5.1968
61.7984	5.7856
51.328	4.352
62.6432	5.5296
67.5584	6.016
49.9456	3.7632
51.1488	3.2768
2.9184	0
5.1456	0
49.0752	2.9184
52.9664	3.4048
54.7072	5.2224
63.2832	15.7184
69.1712	6.1952
164.275	12.7744
40.6016	4.2496
70.7328	5.2224
43.776	3.2256
73.344	6.6816
104.32	10.9824
41.6512	2.2528
37.4528	1.8944
1539.25	33.7664
57.5744	5.1456
50.8672	4.2752
61.2864	4.3008
64.5888	6.6048
57.8048	6.0928
114.099	13.824
62.8224	6.0672
87.6032	8.4992
16.5632	1.7152
62.3104	4.8128
61.4144	6.4768
138.778	10.0352
59.5968	5.3248
55.6288	5.9392
84.5568	8.32
64.9984	5.0432
77.1072	5.4528
60.5696	3.2512
117.402	15.5648
60.8512	4.4544
151.347	15.7696
41.5744	3.5584
72.2176	6.7072
99.9936	7.9104
91.008	7.808
60.0576	5.8624
152.422	17.8176
89.2416	9.6512
66.8416	4.5568
206.182	16.128
76.5696	7.3472
116.531	13.824
50.5344	3.6608
64.256	6.3744
110.106	11.3408
94.9248	6.4512
59.8784	5.4016
39.8848	4.5824
73.728	6.272
55.7824	3.8656
54.3232	7.7568
80.768	7.8592
47.9232	3.2256
50.0224	3.0208
52.5824	6.272
671.283	63.104
49.9456	5.4784
3.6608	0
49.6896	5.376
88.448	10.0864
51.456	3.2
41.2416	2.9952
61.8752	8.4736
49.2288	3.2256
49.28	3.072
108.416	11.648
65.1008	6.144
33.792	2.3552
54.784	4.2752
65.6128	4.9408
126.566	10.6752
27.0336	1.3824
45.9264	2.6624
51.968	8.0896
48.9728	4.8896
73.1648	5.9648
155.136	14.5408
48.384	2.9696
116.864	8.0384
44.2368	3.5584
137.139	9.8816
43.2384	2.7392
94.0288	7.1936
73.2416	5.888
16.4864	0.9984
191.667	22.8096
47.9232	4.9664
38.1952	3.1488
87.0912	9.472
91.3152	10.24
73.5232	5.7344
112.282	11.648
45.0816	3.8144
88.6016	7.168
284.416	9.0112
12.928	1.1264
15.9488	2.2016
68.3776	5.4528
4.0448	0
7.6032	0
69.9904	8.2176
66.4576	7.68
51.4304	4.224
18.5856	1.2288
64.8704	5.2992
137.139	12.7232
121.216	7.8848
84.5824	10.6496
141.338	11.8528
68.352	4.4288
28.3392	0.0512
91.4944	4.9408
51.4048	4.4032
107.11	12.1088
16.2816	0.9472
15.232	0
41.6768	3.968
112.486	12.1088
136.218	15.7184
13.3376	0
245.478	14.08
44.0832	3.328
139.853	17.92
52.9152	3.6608
31.744	1.9456
668.442	50.3296
19.7888	0.256
83.072	6.7328
34.816	2.176
21.0176	1.92
47.744	2.944
496.384	26.8288
96.2304	14.1824
60.3904	6.0928
37.8624	3.2
45.5424	3.7632
46.6432	3.6352
49.3312	2.944
72.4736	7.1936
61.8752	6.4512
63.2064	5.376
28.0832	0.64
63.0016	5.376
34.1504	3.1232
53.4528	2.944
98.2016	9.1392
389.171	40.7808
83.9424	8.4736
67.968	5.5296
135.987	13.312
53.5808	5.5296
660.915	17.8176
44.0832	3.7888
63.6672	5.5552
78.08	7.8848
189.133	19.3024
48.0768	3.2768
41.3952	3.2768
31.8976	0.1536
70.4256	5.2224
22.2976	1.28
59.7504	5.4016
32.8192	4.3264
153.062	18.0224
55.6032	3.4816
56.0384	5.9136
94.9248	15.9488
116.326	15.3344
399.514	11.9552
412.288	43.9808
63.9232	5.0944
17.92	0
17.408	1.0496
18.816	0.6912
58.5472	8.7808
8.3456	0.4096
25.6768	2.5344
56.96	5.9392
75.2128	14.7456
54.2976	4.0704
12.9536	0.6144
67.2	5.376
99.3024	9.728
2.8672	0
47.9488	8.1152
52.3776	4.224
86.5792	9.6
13.8752	0.5376
42.9056	2.3552
1734.12	132.89
15.0784	0.7936
36.096	1.8432
7.0144	0.1792
76.3648	8.704
47.3856	4.6848
67.0208	9.3952
49.8688	4.608
62.464	6.3232
361.267	44.8256
4.3264	0
9.856	0.4352
46.7712	1.7664
75.8016	5.888
51.7888	4.096
604.902	53.376
117.555	11.2384
60.3648	5.5808
5.1968	0
61.2608	5.7088
95.8976	9.1648
57.8816	3.8144
3.2	0
18539.4	814.413
6.6816	0
38.0928	4.6592
5.632	0
5.6064	0
6.784	0
36.8128	7.808
5.9904	0
31.3088	4.352
95.4624	7.4752
58.5216	5.4784
47.1296	6.8608
28.4928	0.3072
17.6896	0.0512
49.152	3.5072
49.6896	5.248
109.67	10.3424
68.2496	7.2704
148.506	20.0192
90.8032	8.832
8.3712	0
22.0928	2.9696
15.4112	0.0256
91.4944	9.3696
42.1888	0
24.448	0.0256
64.3072	5.248
47.7184	3.8656
60.3136	6.5792
175.181	18.176
50.5856	0
24.064	0.7424
37.504	3.0464
74.0608	7.9616
51.4304	4.9664
81.7664	4.5056
15.7696	0.3072
30.5664	4.4288
55.9872	7.4496
99.2768	8.7808
115.379	10.7008
27.5712	0.512
68.224	6.016
28.1856	4.8128
69.6832	5.6832
41.2672	3.8144
29.568	2.1504
38.6816	2.6112
65.024	6.6816
65.3568	6.4256
71.6544	9.2672
45.5424	6.3488
66.56	6.4256
33.4336	2.8672
62.6176	4.7872
148.992	16.2048
69.1712	7.3216
58.112	5.0688
80.9984	10.6752
38.2464	2.7904
80.6144	8.448
60.9792	4.5824
62.2336	6.2976
7.6288	0
95.0528	9.9328
33.1776	3.3536
18.6112	4.0704
66.0224	6.4
59.3664	5.8624
47.4368	4.9408
3.6352	0
20.0704	0
51.5328	4.2752
77.9776	5.3248
39.552	3.3536
67.1232	5.2224
7.0656	0
6.784	0
87.9104	13.1072
7.0912	0
84.1472	9.2672
6.6816	0
32.384	4.7104
230.246	28.9536
50.8416	3.0464
65.8432	10.8544
13.4144	0.0512
69.9392	5.888
213.299	13.4144
37.7088	2.2784
103.322	14.8224
64.4608	5.0176
76.0576	7.7824
49.8176	7.5776
80.8192	8.832
53.4272	4.096
82.5856	7.3472
64.1024	6.4256
52.0704	5.12
34.2272	2.1504
129.894	14.8224
100.07	9.1392
181.222	17.4848
79.6672	6.6304
77.7984	9.1136
71.2192	6.272
34.432	2.8928
28.3648	1.6384
107.904	9.7024
40.7296	3.2512
986.214	86.2208
63.4368	5.632
280.576	40.3456
17.5872	0
50.3552	4.9664
55.3984	6.2464
57.3184	4.8128
62.5152	6.5024
373.222	38.656
106.47	8.6528
120.243	12.8768
111.232	14.3104
39.7568	4.4032
73.9328	5.5808
81.5872	3.6352
38.4256	3.1232
49.024	3.9936
61.8752	4.5312
57.984	3.968
34.2784	2.4576
48.2304	4.0704
67.8144	5.9904
58.8544	6.8608
63.1296	6.1696
63.6416	6.528
89.2672	7.9872
60.8256	8.0128
12.7744	0
229.043	28.0576
104.013	7.7568
80.4096	10.5984
4.5824	0
52.7104	4.48
120.422	12.288
62.6944	6.3488
66.2272	6.0416
22.8352	1.2544
58.1632	6.9376
69.2992	6.9632
9.9584	0
64.3328	5.7856
777.267	12.5952
110.49	14.1824
48.5888	9.2672
37.4272	3.6608
4.4544	0
85.632	6.8096
148.454	12.5696
59.9296	5.1456
62.8224	5.8112
110.438	12.9024
35.584	1.5104
64.896	5.248
49.7408	5.8624
105.856	9.8048
130.253	3.6352
127.155	12.9792
22.6048	0.128
61.6192	4.2752
40.5504	2.2272
48.6656	3.3536
3.8912	0
52.1984	4.1216
120.397	12.6208
23.0912	2.5088
3.8912	0
65.2032	9.4464
49.7152	6.0928
85.8624	10.9824
62.3616	8.3456
91.7504	7.2704
2.944	0
104.141	12.2112
1456.54	49.0496
6.3488	0
78.1568	5.8624
30.08	1.4848
78.848	9.6256
70.8608	8.3968
66.2272	7.296
64.3328	7.3216
37.0688	2.3296
141.901	15.5392
466.048	22.144
3281.31	9.9072
45.1328	4.9408
23.8848	0.4096
36.2752	4.4288
72.5504	6.4256
57.216	8.3456
61.3888	6.1952
73.728	6.528
80.3584	7.9616
146.253	0.0256
7.168	0.128
32.7424	2.7904
121.882	14.8992
34.9952	3.7376
58.0096	6.4512
63.0528	5.9136
44.544	3.7632
45.1328	4.096
39.7056	4.8128
52.352	6.0416
28.8512	3.2768
139.162	14.0032
75.904	5.504
37.9648	0.6912
14.208	0
41.4208	2.3552
114.867	11.4944
5.1456	0
72.832	6.2208
66.2272	6.7072
65.8944	4.736
31.4624	2.0992
27.5968	1.7152
86.7584	7.6288
63.2064	5.12
6.0928	0
54.7328	3.712
97.1776	7.8848
23.2704	0.5376
68.608	4.0192
39.04	1.8944
56.832	5.2736
35.6352	3.1744
193.69	21.0688
55.6288	4.0704
77.1584	9.472
30.976	2.432
35.9424	2.56
51.6864	3.2512
45.6192	2.4832
34.7648	4.2752
21.632	1.792
117.581	12.9792
116.326	13.0048
24.9344	0.5632
35.328	2.176
68.7872	5.9648
39.552	2.5856
56.9088	4.736
63.0272	4.3776
10.4448	0
25.8048	0.7424
104.883	14.5152
67.0208	8.4736
108.109	12.6976
42.0352	2.176
433.997	35.968
55.5008	4.8384
46.1568	4.5312
53.8368	6.7328
18.816	0
54.0928	4.4544
8.32	0
70.6816	5.2736
40.7808	4.1984
21.888	0
11.4176	0.0512
47.6416	5.2224
46.3616	3.4304
54.4	4.5312
45.9776	2.7136
35.6352	3.5584
20.352	0.896
69.1456	8.4992
30.848	2.5088
183.859	10.9056
111.795	8.1408
68.4032	5.9392
98.8928	12.6208
70.3232	5.888
26.2656	0.0512
76.1856	6.0928
65.8688	7.424
23.8592	2.3808
37.4016	3.584
96.6144	8.3968
54.6048	5.2224
45.44	6.016
26.5216	0
73.3184	6.912
1406.28	11.8016
8.8832	0.6656
63.1552	3.9168
74.1376	8.1664
269.952	24.9856
7.3984	0
71.3472	5.4784
64.5632	8.0384
59.5456	6.8608
159.718	12.6464
84.1984	8.6784
451.302	8.7808
96.896	8.3968
64.3584	4.9664
151.117	9.7792
22.1952	0.0512
72.0128	6.1184
35.2512	3.328
3.3536	0
26.3936	2.816
33.3312	2.5856
50.7392	4.1216
104.73	12.5696
177.894	1.024
53.6832	2.7904
56.064	4.224
31.0016	2.816
7.2704	0
47.9232	3.4304
23.8336	0.0256
4.1216	0.2048
66.5344	8.1408
58.6496	7.296
70.0672	4.992
60.032	7.1424
69.8368	5.4016
191.155	19.6096
6.784	0
55.5008	1.5616
28.9024	1.6384
174.08	0.9728
59.3152	5.5808
29.7728	2.9952
49.2032	3.328
81.152	9.9328
114.765	10.112
60.5952	4.736
53.632	3.2512
4.48	0
28.0832	0
32.5888	0.5632
22.528	1.792
32.9728	2.688
[truncated: 19,098 more rows]

## Sheet: Fig 5B raw p fluorescens aggreg
droplet_area	population_area
8.3968	0
2.7648	0
9.1648	0.0768
60.4416	13.312
25.3952	0.896
6.272	0
21.504	0
129.229	16.9984
23.1168	2.3808
23.8336	5.5552
7.3472	0.0256
47.7696	6.0672
18.0992	1.28
4.6592	0
17.92	3.2256
7.9616	0
617.293	53.1712
15.7696	1.28
595.84	116.301
33.2544	2.2272
30.208	7.8592
60.1344	8.0384
53.6576	9.984
6.144	0
15.7696	0
7.5776	0
69.0432	16.2304
33.8176	6.3232
521.907	35.328
3.5584	0
19.3536	0
64.256	16.384
64.3072	7.3984
95.2064	12.2624
7.9104	0
3.6864	0
27.7248	0
9.5232	0
13.5424	0
104.013	12.4928
6.912	0
28.2624	5.6064
39.0144	2.8928
34.0224	5.6832
6.9376	0
32.0256	1.792
21.4528	4.5824
33.7664	6.6816
39.7312	0
79.616	9.216
108.083	18.176
26.5216	0
5.1968	0
39.4496	2.048
22.528	0
14.592	0
32.8448	5.2736
31.2576	0
9.9072	0
25.088	0
27.4176	3.712
6.6304	0
3.4304	0
25.7792	4.2496
3.712	0
86.656	15.2576
53.9904	15.0272
27.4176	1.92
56.7296	2.9696
13.44	0
33.152	5.2224
33.9712	3.9168
5.632	0
15.1808	0
40.8064	4.992
4.7872	0
33.152	5.0176
8.2432	0
33.7152	7.296
103.398	13.9776
6.3232	0
24.704	0
41.2672	5.6064
91.7504	12.6208
3.5584	0
75.8784	13.4656
158.976	27.8784
51.968	3.0208
37.7856	2.56
45.4656	3.1232
50.176	8.576
45.5424	6.6304
50.56	7.9872
34.2528	4.864
38.1952	7.68
29.696	0
38.4512	5.9392
913.408	13.184
11.1104	0
6.8608	0
50.8672	0
9.728	0
35.3024	2.2784
65.3056	12.3648
11.52	0
44.6208	5.504
4.992	0
8.3456	0
31.8464	5.1712
57.2928	9.3952
32.4352	5.1456
2.9952	0
69.7088	13.7216
65.3056	5.3504
34.7648	3.7632
58.9568	9.1392
45.1328	6.4768
7.6032	0
31.1808	2.7392
31.7952	2.7904
32.64	2.6624
34.8672	2.5088
32.5888	6.6304
35.2512	0
38.4256	5.8112
7.8592	0
36.9408	3.2256
3.072	0
53.376	10.7776
27.4176	2.6624
5.4016	0
30.9504	4.6848
48.3072	7.7056
31.2576	6.272
31.6928	5.1968
77.9264	11.4688
4.224	0
4.7104	0
99.5584	26.7008
37.8624	7.9616
193.024	41.6768
28.8256	3.6352
43.7248	7.808
4.3008	0
49.0752	8.4224
59.4688	1.1776
81.4592	17.152
15.9488	0
30.4896	4.9408
41.7536	4.608
36.992	2.2016
28.9536	3.6864
1646.08	417.382
41.3184	2.7392
42.5472	7.424
77.7472	20.1984
323.507	86.7584
81.4336	1.8944
16.9472	0
29.2864	5.6832
37.4784	5.6832
35.5584	3.1232
51.9936	13.4912
38.5536	5.8368
46.8736	2.0224
8.8064	0
44.4416	9.4464
5.4784	0
34.176	2.2016
34.0224	5.9904
2.6624	0
31.7952	0
105.037	6.5024
54.9376	8.0128
39.1168	5.7088
54.3488	11.5456
12.1856	0
19.2512	0
38.272	3.3792
8.0384	0
64.6144	9.1904
32.0256	2.6368
161.536	36.1984
40.7808	8.7296
7.7056	0
1395.4	212.941
3.0208	0
39.3728	5.888
16.5632	0
75.9296	19.1488
37.888	5.7088
102.4	18.9952
13.7472	0
41.6256	6.6048
59.3664	13.9264
5.6576	0
104.525	1.2288
3.6352	0
40.9088	2.8416
43.264	5.8624
25.9584	0
70.1184	13.7216
36.0448	6.3488
37.7344	5.2736
71.2192	10.7008
70.2208	12.8512
55.5008	10.4448
23.5264	0
6.4768	0
4.3008	0
7.2448	0
6.144	0
5.4528	0
3.9424	0
47.488	9.4464
18.3552	0
74.8544	13.5424
98.3808	28.0832
7.4752	0
39.936	5.5552
36.352	7.5776
26.3168	9.3184
7.9872	0
49.6896	9.0112
23.5264	0
44.3904	6.4768
29.952	5.4016
3.6864	0
73.984	8.6528
2.7904	0
637.133	92.6464
35.9424	2.3552
1378.56	237.978
4.9408	0
45.824	11.0848
3.8912	0
12.1856	0
4.1984	0
36.8896	2.4064
6.7072	0
8.5504	0
6.4	0
35.9168	2.3296
5.5808	0
24.8832	0
97.536	0
38.2976	6.4512
28.9792	0
30.5664	5.6832
2.9696	0
29.0816	2.8672
31.4624	4.8128
7.936	0
5.2992	0
26.112	5.0432
12.9024	0
35.7376	6.6816
5.248	0
3.456	0
34.3808	5.9392
30.6688	5.5552
43.8016	5.7344
15.872	0
12.6976	0
33.6128	6.0928
32.0512	4.4544
11.2896	0
51.6608	0
4.6848	0
15.9488	0
21.3504	0
58.5984	8.448
45.1584	4.6592
48.8448	5.9136
5.5552	0
18.944	0
2.5856	0
30.5664	12.8256
40.2176	9.6768
35.8912	4.3264
6.9376	0
39.4496	2.6112
11.9296	0
47.3088	7.7568
41.2672	5.9136
1182.87	214.784
73.1648	16.128
7.2192	0
47.1552	7.7568
465.075	79.4112
145.459	31.8208
7.936	0
7.7056	0
19.9168	0
4.7104	0
8.2176	0
34.4832	6.9632
39.8592	0.7168
5.0688	0
34.56	3.0208
6.144	0
104.115	26.1376
34.3552	4.5824
43.52	6.7328
8.6528	0
31.744	5.76
4.0448	0
62.5664	6.0672
9.2672	0
38.2208	2.3552
46.9248	11.5968
18.176	0
78.8992	17.3568
47.4112	7.0912
3.2512	0
47.6672	4.7104
12.5184	0
20.3008	0
48	6.0928
8.2432	0
39.9872	3.9424
32.9216	6.1696
14.976	0
33.5616	5.9904
35.6608	1.4848
98.2528	24.8832
9.2928	0
70.6048	12.288
13.5168	0
31.104	2.9952
14.2592	0
5.888	0
2.7648	0
43.136	4.1216
8.96	0
4.7104	0
157.645	20.7616
33.9712	1.8688
15.8464	0
26.5472	2.8416
6.9376	0
21.12	3.3024
33.6384	5.6576
74.8288	17.2032
5.5552	0
6.912	0
4.3776	0
47.3088	6.0416
6.5536	0
20.7872	3.8912
7.8336	0
7.3216	0
14.2592	0
83.2	14.208
282.65	79.7696
360.243	145.152
28.16	4.3008
8.7552	0
40.6784	4.5824
10.88	0
32.2304	4.9408
4.224	0
32.9984	8.7296
9.0624	0
8.2944	0
69.1712	10.4704
16.5632	0
555.008	146.586
26.1376	3.5328
5.8112	0
43.776	3.6864
37.9904	2.9184
7.6288	0
53.2224	8.1408
3.8144	0
36.3264	4.3776
21.6576	2.56
7.5008	0
40.576	4.5312
11.52	0
7.68	0
35.1232	4.4032
30.1824	4.9664
13.2096	0
42.7776	3.3024
36.992	2.2272
32.3584	4.1984
89.9072	20.48
36.7616	5.5296
3.4048	0
6.784	0
2.7648	0
5.8112	0
10.5216	0
38.3488	5.5296
20.5568	0
18.304	0
9.1904	0
6.7072	0
6.8096	0
8.96	0
28.672	5.12
38.0672	8.6272
5.9904	0
35.6352	2.432
19.7376	0
34.3808	3.7632
2.7648	0
13.824	0
57.6	8.0896
40.6016	5.4528
52.1984	14.208
32.6144	5.1456
53.9136	10.6752
38.9632	8.448
25.344	7.1424
109.389	33.7408
38.8352	1.8688
47.36	3.3792
6.5024	0
3.9424	0
5.3248	0
2.7904	0
33.28	5.8112
2.8416	0
64.9984	8.3456
58.752	6.144
4.6848	0
2.7904	0
7.5264	0
8.448	0
41.2416	4.4288
76.3392	13.5168
44.6976	6.784
58.9824	11.3408
9.7536	0
36.1984	2.4576
42.9568	6.1696
56.7296	5.4528
33.0496	1.28
74.24	8.704
50.9184	2.7136
31.2576	5.5808
59.776	13.4144
109.107	22.9632
26.112	2.3808
7.1424	0
9.0624	0
53.2736	8.832
6.9632	0
28.8768	5.2224
111.565	22.9888
2.8672	0
30.1824	4.8896
9.1648	0
10.752	0
9.7536	0
12086.1	1756.26
9.8816	0
36.0704	3.072
8.0896	0
37.12	5.5552
35.7632	1.664
12.9024	0
52.736	7.1936
52.3776	11.0336
37.376	4.224
533.248	125.594
6.656	0
714.829	148.634
46.7456	7.3216
36.864	6.6048
87.9872	13.1584
76.9536	19.9168
59.9808	12.0576
31.9488	5.504
36.7104	5.0176
15.488	0
16.7936	0.9216
51.84	8.3968
28.2368	0
110.464	10.3936
147.738	35.84
6.9632	0
9.6256	0
39.7568	8.3712
3.7632	0
39.3984	8.6784
37.7344	4.1472
7.6288	0
70.6816	15.1296
114.56	24.1408
35.6608	6.3488
14.8224	0
62.5152	12.288
7.8336	0
40.5248	5.7344
8.4736	0
123.725	33.2288
8.3456	0
9.728	0
45.184	8.0384
13.2352	0
3.4304	0
6.6816	0
33.28	7.2192
33.5104	6.2208
3.584	0
8.32	0
27.264	0
126.566	11.4432
39.3472	6.5536
31.7696	4.1216
21.4016	0
4.7872	0
32.8704	4.3008
5.6064	0
3.4304	0
37.12	4.5312
35.328	4.5824
39.5264	7.424
31.0528	5.4016
58.2912	14.1824
53.376	11.7248
47.8976	7.9616
33.3568	5.9648
4.0704	0
8.6784	0
36.1472	2.9184
78.8992	11.0848
40.1152	6.9888
35.968	8.0896
31.0016	6.9632
27.1872	4.5312
10.496	0
5.248	0
85.2992	21.5296
105.293	17.0496
69.0432	9.8304
38.2464	8.064
33.8944	2.9184
33.152	3.3024
75.0592	20.3776
145.818	23.936
13.3376	0
2.7904	0
5.9392	0
70.5536	0
3.8912	0
13.9776	0
13.4144	0
4.48	0
10.9824	0
49.024	7.4752
4.7872	0
4.6336	0
34.0224	4.1472
277.222	48.3072
13.952	0
32.3584	5.12
52.8128	6.6304
30.9504	6.0416
15.2832	0
6.0416	0
40.2944	6.912
4.2496	0
3.2256	0
38.6048	7.9616
63.1808	12.3392
28.5696	4.6336
17.3568	3.9168
40.0896	12.2112
40.4224	5.2992
65.8944	9.7024
36.096	4.096
5.0432	0
4.5568	0
3.5584	0
34.9696	7.1424
8.448	0
33.0752	4.224
9.9584	0
133.811	27.6224
37.1712	6.2208
30.9248	0
13.1072	0
72.1152	14.5664
2.8672	0
220.518	9.1904
28.5696	7.424
119.578	29.7984
39.1424	5.7344
45.3632	8.832
5.8624	0
50.6624	6.912
118.144	20.7872
56.704	5.1712
28.0064	4.8896
3.8912	0
4.3776	0
12.2368	0
34.7136	2.944
9.8304	0
31.3344	4.9152
3.0976	0
31.1552	2.3296
13.2096	0
5.6576	0
9.8304	0.0256
66.6368	7.296
146.765	35.1744
33.8176	3.1232
3.1232	0
119.654	28.3392
322.406	63.2064
8.2688	0
2.7136	0
36.5824	2.7392
6.3232	0
58.1888	10.4448
40.4224	3.8656
76.6208	9.3696
15.4112	0
39.8848	3.2512
5.376	0
3.4816	0
28.288	1.6384
71.808	9.344
8.6528	0
5.2736	0
44.7488	4.096
33.664	3.6864
41.3184	8.2688
5.6832	0
38.272	7.552
23.7056	3.8656
72.448	17.28
6.784	0
78.0032	14.208
7.808	0
35.712	5.0432
8.192	0
62.4384	7.6032
14.5408	0
54.8864	10.624
3.7888	0
9.6256	0
5.3504	0
97.2288	15.2576
23.2448	0
30.3872	3.456
60.1088	6.4
67.6352	19.072
42.8032	2.8416
2.688	0
61.4656	22.8096
108.237	15.36
30.7456	4.4288
159.923	52.8128
637.056	139.11
105.395	24.8576
47.4112	3.3792
46.5408	6.272
31.9488	5.0432
3.3536	0
70.0672	5.0176
41.0624	7.9872
36.7616	7.808
35.8656	6.2208
34.6368	0
43.6992	6.1952
3.6096	0
40.1152	1.7152
34.6368	2.048
56.704	16.256
3.8144	0
42.0864	9.1648
58.24	11.008
53.7088	5.0176
9.088	0
14.08	0
14.8992	0
3.6352	0
3.6608	0
2.9696	0
34.176	2.2784
6.528	0
3.84	0
66.9952	20.8128
63.7184	9.2672
8.4736	0
4.5312	0
43.0592	9.1904
3.7888	0
50.5344	3.3792
11.3152	0
6.656	0
7.7056	0
2.6368	0
13.5168	0
35.9936	0
4.7616	0
11.0592	0
66.048	13.0304
93.2352	14.2848
6.6304	0
61.5936	10.5984
35.328	2.7648
8.576	0
53.9392	5.8368
12.7232	2.5856
66.3808	16.5376
3.7376	0
28.0576	5.9136
2.7136	0
11.136	0
35.712	2.2784
9.3696	0
49.2288	10.624
67.3024	8.1408
2475.85	114.662
53.1456	11.3408
77.9776	11.6224
491.802	134.298
34.8416	3.2512
32.1792	5.6832
84.4288	17.2288
77.1072	19.84
21.8368	7.5008
57.6768	6.0672
7.0144	0
3.0976	0
504.371	89.4208
41.088	6.1696
70.2208	7.3216
45.568	8.8576
38.9632	3.6096
38.1952	4.992
41.0368	3.84
160.563	14.2848
684.672	156.8
5.0432	0
100.045	15.5136
28.6976	0
4.6848	0
32.2048	2.048
1460.61	236.134
49.5616	8.4992
34.1504	4.4032
31.232	2.1248
5.8112	0
35.5584	6.5536
5.5808	0
32.9216	1.6896
2.7904	0
41.6512	9.6768
14.8224	0
4.6336	0
2.944	0
7.168	0
22.2976	0
30.3616	6.144
27.4688	0
41.8816	9.216
39.7312	5.2992
238.694	95.2832
39.168	4.2752
3.7376	0
58.3424	3.4304
32.1536	2.8672
6.4768	0
11.0592	0
59.2384	10.1888
34.5088	7.3728
71.552	5.5808
35.712	8.8064
53.8112	9.1392
6.0416	0
22.9376	0
30.3872	2.8672
29.2864	4.608
596.838	117.606
36.736	2.9952
30.5664	1.5104
38.8864	2.1504
33.1008	5.1968
7.1424	0
26.496	2.304
30.1056	6.1952
28.8512	3.5328
8.6528	0
46.08	7.6288
29.4144	6.2464
33.2544	3.2768
17.1264	0
6.4768	0
89.0112	21.0176
37.8368	5.5296
11.8016	0
65.6384	12.6208
122.675	3.7376
8.4736	0
65.3568	17.3568
37.4272	2.2016
8.4736	0
33.8944	7.936
8.2432	0
3.4304	0
5.1968	0
12.16	0
30.08	4.5568
4.7616	0
60.7232	17.9968
38.4	4.2752
3.6096	0
28.9792	3.8912
117.632	35.1232
6.4256	0
58.2656	15.872
47.232	9.0624
39.0912	8.448
8.8576	0
39.3728	5.6832
7.3472	0
35.5072	2.8416
55.424	8.1408
10.9056	0
10.1888	0
11.3152	0
46.1824	8.1408
39.0912	7.552
31.104	4.48
6.9632	0
31.2576	5.504
72.4736	16.4096
47.5392	3.328
22.8608	7.4496
13.2352	0
3.1488	0
56.0128	9.0368
3.5584	0
17.4592	0
30.464	6.272
43.9296	7.2448
19.2768	1.4592
7.6288	0
34.56	6.3488
9.9584	0
8.5504	0
30.208	4.9408
42.8032	8.576
35.7888	8.5504
52.8128	7.6288
3.84	0
11.9808	0
4.3008	0
3.6608	0
5.1712	0
16.1792	0
56.3712	9.3184
30.8992	2.944
29.0048	2.7392
9.5744	0
53.632	10.1376
33.7664	6.3232
10.2912	0
5.8112	0
6.0672	0
3.4304	0
18.9696	0
26.8544	0
40.9856	8.0896
4.1728	0
192.742	32.9472
37.4272	8.6784
3.5072	0
36.7616	2.4064
3.712	0
32.1536	5.4784
53.4784	7.7056
8.8576	0
14.336	0
139.213	33.3312
3.3536	0
40.5504	6.5536
9.9584	0
12.1856	0
4.096	0
235.29	49.9712
3.456	0
6.016	0
14.8736	0.2816
16.3584	4.096
33.3824	6.9888
9.6512	0
6.0928	0
8.7296	0
32.0256	4.1728
47.4624	0
15.5904	0
3.0464	0
21.1968	0
11.2384	0
33.5104	8.1664
41.728	7.3728
50.5088	9.9328
65.3568	12.3392
47.616	13.6704
33.8688	2.7136
37.8624	0.2304
34.1504	7.168
38.144	5.504
52.4288	7.8848
12.2112	0
9.472	0
20.8384	0
33.6384	6.3488
35.584	1.1008
58.6752	10.2144
3.2768	0
120.934	26.368
19.6096	0
7.552	0
12.9792	0
36.7872	8.2688
11.648	0
9.0368	0
40.3456	0
6.3488	0
137.728	32.2304
11.52	0
5.6064	0
38.8608	15.2576
6.0672	0
45.7984	3.5584
4.3776	0
23.3216	5.3248
55.936	10.1376
121.728	27.1104
99.584	16.4608
46.848	10.88
35.712	3.328
9.2416	0
13.0048	0
24.96	2.8928
11.6224	0
43.0336	5.8112
34.3552	3.456
106.931	0
19.0464	0
38.7328	6.3488
35.5328	4.5824
43.7248	5.6064
31.232	4.3264
57.2928	13.2864
2.7136	0
53.2224	12.416
23.1936	2.9696
87.5264	5.248
39.7056	8.4992
36.3776	5.2736
37.3504	8.0896
8.2944	0
9.7024	0
81.6384	14.336
36.992	2.0736
7.4496	0
3.328	0
67.968	14.0032
6.3232	0.0256
2.5856	0
7.6032	0
6.1696	0.0256
58.624	10.88
8.1408	0
6.784	0.0256
8.6272	0
13.6192	0
50.7136	6.4512
114.202	24.9088
60.1856	9.1904
67.7632	13.0048
56.064	7.7568
34.4064	6.6304
36.4544	4.224
3.2256	0
36.864	1.0752
5.7088	0
41.344	6.2464
32.2048	3.6352
45.4912	3.6352
5.0176	0
2.6368	0
21.9392	0
94.72	19.9168
38.0672	8.7552
54.4768	9.7792
27.8272	4.1728
30.7712	6.5792
27.2128	2.2016
11.264	0
47.5136	6.4256
61.0048	11.0848
40.2944	6.3488
44.9792	6.8864
33.792	7.7568
56.6528	8.0896
3.1488	0
3.6352	0
38.0928	8.0128
73.8048	9.4464
8.6784	0
59.3152	11.6224
30.5664	6.5536
29.2608	6.1696
76.4416	18.7648
12.1856	0
1710.18	453.709
41.5488	7.8336
58.5216	16.8192
31.2832	5.4272
31.7184	5.76
3.4304	0
32.3072	7.3216
63.616	13.312
3.1744	0
32.128	3.3536
35.9168	6.2208
5.4784	0
59.1104	14.3616
37.6064	5.632
3.84	0
35.0976	4.2496
8.1664	0
45.9264	5.8368
58.0096	13.5168
46.9504	7.5776
48.3584	11.8016
54.912	11.1616
10.9056	0
35.7888	2.6624
82.8672	19.84
6.0928	0
41.2416	6.2464
3.6096	0
27.5712	1.6384
66.4832	11.4944
38.9376	3.84
7.808	0
48.896	5.12
63.5136	10.3168
49.92	0
44.6464	5.9136
358.707	114.278
30.5664	5.0944
6.4	0
61.312	11.3152
5.4784	0
19.584	0
49.9712	14.2848
67.0208	15.232
4.1984	0
35.4048	0.3328
4.8896	0
148.301	32.9472
33.8176	4.3008
35.072	3.9168
3.4816	0
42.7776	7.168
1690.04	273.894
77.568	21.632
67.7632	6.6816
14.4384	0
29.2608	0.0512
11.6224	0
33.7408	2.7392
2.6112	0
41.1136	7.0144
950.733	182.195
32.8704	5.4272
4.0704	0
5.376	0
21.8368	6.1696
7.936	0
10.6496	0
90.368	18.5088
4.8128	0
3.4048	0
10.0608	0
11.3152	0
28.1088	3.6352
481.613	21.8112
12.288	0
45.8752	0
84.7872	12.5696
46.1568	9.7792
38.8352	3.6608
28.7232	5.1712
36.1216	6.5536
32.3072	8.7808
59.904	5.5552
20.1472	4.4544
141.133	26.112
36.7872	10.6752
36.6848	7.7056
4.7104	0
22.8864	0.2304
56.9344	14.2592
32.4864	5.4272
29.5936	1.5104
37.3248	5.8112
5.0432	0
7.7056	0
2.688	0
30.2336	3.4816
35.1488	5.4016
48.2816	1.7408
69.888	14.8224
37.7344	3.5328
30.9248	2.7904
30.6432	3.1744
87.6032	19.3024
35.7632	5.5552
31.1808	5.1968
4.0192	0
57.6	10.5216
43.3152	4.6336
49.92	11.008
23.3728	4.48
42.5216	8.0128
2.8928	0
60.544	12.5696
144.819	0.9472
15.7696	0
50.7392	13.696
83.2768	10.1632
38.9888	7.6544
169.37	44.288
50.6112	5.6832
29.1328	5.7088
6135.91	550.989
29.5424	6.5024
8.8576	0
5.8368	0
4.864	0
33.2544	6.6048
7.04	0.0256
9.472	0
6.912	0.0256
9.2672	0
59.6736	9.3696
10.1888	0
7.168	0.0256
5.5552	0
118.272	28.5696
3.4048	0
7.3728	0.0256
15.6416	0
14.0288	0
32.8448	0
48.1024	7.808
30.3872	8.0384
45.6704	3.9424
3.84	0
32.0768	3.1744
28.672	3.5328
39.2704	9.0112
29.1328	7.6032
34.7904	2.5088
3.0464	0
2.6624	0
56.7296	8.448
43.9552	6.1952
56.8576	8.8064
47.872	7.4496
47.0016	9.1392
31.2832	0
3.9424	0
34.5344	7.3984
139.187	36.096
63.0784	12.5696
28.8	0
49.28	13.2096
2.8672	0
7.7824	0
128.742	20.2752
16.1024	0
35.4304	7.6288
43.2128	7.8336
42.0608	2.176
95.4624	26.7776
37.4016	2.944
40.1152	7.2448
44.6208	9.9328
33.2032	6.3488
28.2624	0
53.8624	7.0656
3.2512	0
7.552	0
10.8544	0
14.0032	0
35.4304	7.04
7.68	0
6.528	0
35.8656	2.432
50.0224	6.784
3.456	0
37.12	5.4016
3.5328	0
38.4256	6.4768
49.4336	0
43.9808	3.9168
2.9696	0
230.886	52.5824
37.4016	6.8096
32.3072	7.7824
55.6544	8.6784
97.0496	22.9632
6.3232	0
7.8592	0
32.1792	0.128
40.576	8.2944
4.7872	0
21.12	0
6.0928	0
125.184	36.992
27.136	0
21.2736	0
3.1488	0
216.55	29.1328
4.224	0
33.0752	7.7056
39.7312	2.8928
39.3984	6.656
8.2432	0
34.0224	3.9168
8.4992	0
41.2672	7.168
8.7552	0
36.5568	1.8688
3.9168	0
7.8336	0
37.6064	6.4256
6.9376	0
56.6784	10.0608
61.8496	18.4832
31.5648	7.0912
28.7488	3.5072
4.5056	0
62.4128	6.6816
125.901	30.1568
46.2336	7.3472
3.8912	0
41.088	8.576
119.936	28.2624
32.4096	5.2736
5.5808	0
13.5424	0
164.864	29.1584
79.0272	18.4064
36.2496	7.4496
4.9408	0
30.6688	6.6304
11.1872	0
4.3264	0
33.792	7.2192
11.4688	0
38.3232	2.4576
40.1152	5.1968
42.496	9.3952
49.9456	8.5248
38.2976	4.2496
35.0208	6.5024
52.1472	13.8496
79.104	18.432
54.272	8.1664
9.6256	0
39.0912	5.4784
47.4624	9.4208
7.0656	0
46.976	10.1888
32.4608	4.0704
44.2112	8.2688
37.0688	7.9616
86.0928	21.7344
34.7136	7.3728
34.7648	1.8176
34.9696	6.1184
3.9424	0
14.4384	0
31.5648	7.1424
63.0016	3.9168
5.888	0
4.992	0
32.7936	1.4848
33.5616	5.9136
23.2192	3.84
13.7728	0
65.2544	17.4592
2190.31	303.104
122.419	31.6928
3.4816	0
58.3424	5.0432
42.8544	7.5264
5.9392	0
6.6048	0
62.8992	15.1808
9.5744	0
90.7008	11.136
42.752	5.888
36.8896	6.7328
42.0608	7.2448
678.144	142.438
72.8832	16.7424
31.6672	6.2208
5.7344	0
11.8016	0
20.096	0
9.1392	0
40.5504	7.8848
134.17	33.9968
31.8976	5.7088
34.0992	5.0944
3.968	0
47.5392	3.968
82.2016	11.648
37.6832	6.7584
7.1424	0
7.8592	0
98.3552	14.976
33.2032	4.992
215.373	37.504
6.2464	0
30.4384	7.8592
2.688	0
3.0464	0
13.4144	0
39.6288	3.8912
42.0352	5.7088
60.7232	12.1088
38.6304	8.2944
40.6784	3.1744
18.4832	2.4064
31.4624	5.3504
49.0752	6.6304
38.144	8.2432
2.9184	0
72.5248	10.496
32.8448	0
36.8896	6.528
31.4368	4.2752
6.272	0
11.8784	0
5.7856	0
9.0368	0
32.4864	7.2448
27.8784	5.6576
54.0416	9.9072
49.2544	10.3168
11.5456	0
5.0688	0
41.8048	8.7552
41.5232	4.5824
7.04	0
49.9712	12.8
39.1424	7.3728
34.1504	7.168
13.056	0
4.7616	0
55.8848	12.8
11.8016	0
5.5552	0
30.5664	4.0704
6.5024	0
524.339	101.632
6.9888	0
5.9392	0
6.2208	0
6.272	0
31.4624	3.8912
2.5856	0
4.6848	0
47.3856	7.9616
33.4848	0
6.0672	0
16.9472	0
59.5712	12.544
33.5872	4.096
3.328	0
5.7088	0
10.9824	0
31.6672	4.2752
43.6224	9.6512
54.1696	3.968
7.3472	0
21.8624	0
16.0768	0
3.2	0
51.6352	8.6272
10.5216	0
4.4544	0
76.1344	13.7472
13.3632	0
35.3024	3.0464
8.7552	0
37.4784	3.2768
718.234	155.136
47.104	12.1088
53.0432	9.4976
33.8432	3.328
38.016	2.304
43.2384	5.376
7.5776	0
53.5296	12.6208
101.427	29.184
173.158	18.5088
7.6032	0
37.1712	3.2256
11.3664	0
30.6432	5.76
31.5904	1.408
11.0848	0
29.2608	5.2992
118.656	26.2656
183.296	39.0656
64.0256	14.1312
40.576	9.0368
58.2144	10.9824
52.7616	8.96
20.7872	0
8.4736	0
6.528	0
41.0624	8.2688
69.376	17.2032
73.3952	16.256
165.658	48.64
55.5776	6.784
31.0272	4.6848
49.5872	5.8624
12.8256	0
51.6352	7.0144
68.0448	14.1824
3.1232	0
36.7872	4.4288
68.6336	11.9808
7.168	0
5.376	0
36.5312	6.144
35.7376	1.2288
33.536	4.8384
32.2304	3.712
20.8384	0
36.6336	4.736
6.1184	0
32.2048	4.6336
38.6048	5.7088
31.616	2.0224
4.0192	0
8.704	0
28.1088	2.9952
9.2416	0
43.1616	0
10.2144	0
50.9184	9.4208
31.6928	5.9136
59.4688	9.6512
34.5344	0
6.2464	0
42.8032	5.6064
20.5056	0
7.2192	0
6.0416	0
75.1872	9.5488
3.4304	0
67.1488	13.2352
4.608	0
10.6496	0
45.2608	7.0144
15.2832	0
6.6304	0
43.0848	4.5056
34.2016	5.3248
31.9232	2.048
25.7792	5.6576
84.1216	20.7872
98.2016	15.8208
64.6912	7.6544
262.272	37.4016
28.032	2.1248
15.4368	0
11.4176	0
34.6112	6.0928
15.6416	0
49.6896	8.448
9.2928	0
28.9024	3.584
46.2592	9.856
45.3888	6.0416
4.5056	0
33.0496	5.504
33.6384	3.328
34.7904	4.608
35.584	6.016
77.7728	11.5968
40.5248	6.8608
33.408	4.736
31.9488	0.7936
26.9568	1.5104
9.7792	0
29.4912	3.584
3.6608	0
42.368	10.3936
33.7152	3.6352
3.2256	0
6.9632	0
50.7904	15.5392
102.886	19.6352
36.4544	2.2528
33.0752	5.6832
35.5072	3.6096
74.4704	10.1632
6.912	0
35.4816	3.3792
3.2	0
8.6272	0
4.7872	0
10.88	0
15.3344	0
21.2224	1.408
53.9648	6.5792
35.0976	0
31.9744	2.432
279.654	12.1856
46.3872	7.936
6.2976	0
9.7024	0
56.704	10.5216
5.632	0
70.4	14.2848
68.0704	9.6512
150.81	41.9328
38.2208	6.784
9.0368	0
26.5984	5.1968
5.6064	0
19.2512	0
30.4128	3.2768
64.6656	10.9824
64.3072	17.3312
72.0384	0.2816
2.7136	0
4.0448	0
31.1552	5.1712
173.722	46.336
37.0176	2.432
5.8368	0
30.336	5.632
3.0464	0
31.0784	5.8368
30.1056	1.5104
48.6912	4.2496
37.0176	4.0192
30.5152	0
32.1536	2.3808
15.9488	0
39.552	3.328
34.6368	8.2432
56.2944	9.7024
72.6784	8.2432
6.9632	0
3.7888	0
4.3776	0
25.4976	0.6912
624.742	10.5728
21.8624	6.016
34.048	4.1984
50.8928	9.3696
36.4032	7.2192
5.1968	0
4.9408	0
9.7536	0
2.9184	0
37.1968	4.4544
6.144	0
60.8512	6.6048
8.7296	0
37.248	2.9184
14.6688	0
14.1568	0
661.581	130.662
6.8096	0
7.2448	0
29.7984	3.5584
42.3168	8.6016
51.6608	9.6
13.2096	0
3.712	0
5.8112	0
20.3776	0
32.6912	2.176
186.24	32.4096
6.4	0
67.1744	12.16
5.2224	0
153.677	20.4032
710.81	85.3504
82.3552	20.3264
49.5872	5.2992
30.4896	5.1712
39.7568	5.5552
3.7376	0
4.4544	0
33.2544	4.5824
57.8816	12.2624
35.5072	2.4832
63.872	10.496
33.6384	4.8128
8.192	0
56.6528	0
36.0192	6.1184
37.5552	2.7904
5.8368	0
18.4576	0.6656
11.4688	0
14.1056	0
42.5984	5.9136
10.88	0
6.8608	0
97.408	14.3872
58.624	11.8784
32.9216	6.6048
12.8256	0
35.584	1.92
65.9456	12.5696
39.0656	8.448
43.8784	2.5856
3.8656	0
32.512	3.9168
33.5616	0
4.7616	0
13.8496	0
10.1376	0
3.072	0
3.3536	0
8.704	0
15.7696	0
36.1472	3.3536
6.5536	0
5.8624	0
78.5152	14.848
3.6352	0
58.0608	10.3424
109.133	17.1776
39.6544	5.0944
6.6048	0
3.3792	0
38.9888	6.3488
34.048	5.1456
89.8816	14.2848
36.5056	2.9952
42.88	7.0144
92.4672	14.6432
8.3968	0
29.8496	5.2224
3.4304	0
84.8896	19.0976
36.8384	8.3712
19.4048	0
7.3728	0
32.6144	5.1968
6.7072	0
6.6304	0
72.0896	4.5056
4.1472	0
38.784	7.3728
23.8848	3.9936
37.6832	9.1904
46.336	8.4736
20.8128	0
125.798	29.9008
10.4704	0
2.6368	0
31.2832	5.9136
38.1952	7.0144
57.344	11.3664
4.48	0
50.9696	5.6832
9.0112	0
14.08	0
20.6592	0
5.4016	0
4.0704	0
45.056	6.0672
49.664	7.68
51.1232	8.9344
6.1696	0
6.8096	0
41.1904	5.3504
7.4752	0
11.7504	0
47.104	4.8384
30.72	2.5088
2.5856	0
35.9424	7.1424
3.4304	0
7.9616	0
58.8288	7.0656
57.5744	6.144
111.155	22.3488
104.038	19.6352
3.3024	0
30.336	4.3008
3.6352	0
2.816	0
17.5872	0
3.712	0
88.7296	21.0944
11.008	0
6.912	0
3.6864	0
7.1936	0
6.4512	0
71.5008	11.264
72.6016	9.9328
36.224	5.6064
3.3792	0
69.8112	10.8032
7.4752	0
50.9952	7.0144
558.157	100.301
130.79	37.1968
33.1264	2.944
54.016	8.704
90.1888	37.76
2.8416	0
90.2912	18.8672
43.7248	6.0672
120.576	0
50.176	7.68
30.0032	4.7872
50.944	8.1408
40.0384	4.48
57.5232	8.5504
46.8736	4.352
9.2416	0
28.8768	4.6848
7.1424	0
10.7008	0
31.104	4.608
27.5712	2.3552
4.9664	0
48.2048	8.8576
11.9296	0
56.9088	0
6.8608	0
39.808	7.552
15.5904	0
88.9088	27.2896
13.7216	0
42.4192	4.8128
12.7744	0
15.7184	0
29.0048	4.3776
66.9184	12.928
65.2288	13.6192
6.1696	0
32.0256	5.0176
3.7376	0
38.0416	5.2736
3.6096	0
3.9168	0
26.0864	2.048
28.1344	3.5072
72.4736	13.6448
31.5136	4.4032
46.2848	7.8592
37.632	6.0928
173.133	33.792
84.8896	21.4784
35.3536	6.3232
7.7824	0
13.8496	0
9.4976	0
2.6112	0
4.4288	0
4.5568	0
36.0192	2.1248
134.886	22.2976
2.6112	0
47.5136	7.1936
23.424	0
67.328	11.4944
12.5952	0
73.8816	13.0816
44.672	6.9376
45.1584	6.6048
188.186	48.7424
79.4368	16.1536
33.5104	4.9408
36.9408	3.5584
3.5584	0
3.3792	0
39.936	4.4288
63.7952	12.8512
123.366	6.144
3.4304	0
134.502	44.1856
4.8384	0
47.0016	10.0608
72.576	17.1008
28.544	3.5328
11.9296	0
61.4144	8.1152
6.6048	0
34.304	3.3536
2.944	0
70.5024	9.7792
10.9056	0.2816
100.198	21.0944
28.032	4.0704
43.8528	0
67.5328	12.1344
41.6768	4.224
36.0704	7.3472
6.656	0
5.2736	0
12.4416	0
7.296	0
39.68	2.4576
4.9664	0
31.7184	2.4064
32.8192	5.8112
3.0208	0
44.416	5.7344
8.2944	0
5.6832	0
34.2016	6.144
34.944	2.1504
11.52	0
37.4784	5.7088
98.4832	19.2512
32.4352	6.9376
11.9552	0
37.8624	0.9472
6.5792	0
41.728	3.4048
78.1312	0
4.3264	0
1910.99	397.466
39.1424	4.4288
4.864	0
14.7456	0
4.4544	0
65.4336	13.7472
6.4256	0
79.0784	12.9792
12.8	0
33.8176	3.584
5.6832	0
61.6192	9.4976
446.208	5.6832
12.9024	0
78.4896	13.9776
38.0928	6.8864
30.4384	2.7648
11.7248	0
7.5776	0
2.8672	0
184.627	34.9184
2.7648	0
5.4528	0
39.4752	5.376
13.2864	0
8.064	0
38.5024	5.0432
2.5856	0
9.8816	0
2.6624	0
61.5168	12.9792
103.654	17.7152
7.2704	0
3.9424	0
32.1024	4.9664
14.1824	0
593.562	123.648
9.0368	0
5.2736	0
11.8016	0
71.1936	17.8944
30.2848	4.2752
24.4736	1.8688
6.6304	0
4.864	0
14.8224	0
36.864	5.0432
9.984	0
3.584	0
3.4816	0
10.3168	0
43.9296	5.4016
7.5776	0
36.736	5.12
100.915	13.3888
29.4656	3.4048
24.8576	4.608
58.6752	10.0608
11.52	0
31.4368	2.8672
7.9616	0
7.8336	0
65.5616	11.8272
7.0144	0
4.7104	0
14.1824	0
30.6944	4.1984
34.2528	4.9664
33.28	6.2464
44.1344	4.096
70.8096	12.8768
38.2208	6.9888
28.16	3.1488
6.528	0
38.4256	2.3808
5.7856	0
64.0512	12.288
2.688	0
6.7584	0
25.216	0.5632
66.7648	11.9552
3.712	0
36.0704	3.0976
37.8112	5.4528
10.5728	0
8.32	0
39.5008	5.9136
4.5056	0
41.9328	5.1456
8.448	0
36.1728	3.5072
2.8672	0
322.509	57.5744
35.84	4.3008
3.3792	0
41.4208	3.8656
8.704	0
32.7424	4.7616
2.6112	0
2.7392	0
11.136	0
45.0048	5.4016
8.5248	0
4.5824	0
24.8576	3.4048
41.9072	6.3744
6.144	0
14.592	0
24.064	0.8192
5.248	0
42.7264	8.9088
34.2016	5.6576
12.7744	0
7.6032	0
6.6048	0
8.448	0
8.6528	0
21.1712	3.2256
19.0208	0
105.037	17.5872
11.2384	0
9.216	0
48.9216	8.2432
35.3792	6.8864
35.4048	2.816
5.504	0
10.1376	0
84.3776	6.4768
9.2928	0
4.224	0
36.0704	6.3744
2.8416	0
73.472	15.3088
171.955	33.152
37.2992	2.9952
2.944	0
47.9232	5.76
28.9792	2.432
7.936	0
2.944	0
34.688	5.8368
16.256	0.2304
37.2992	3.1232
3.8144	0
37.0688	2.1504
10.5728	0
146.534	31.8976
12.6464	0
511.949	102.221
4.5568	0
6.1696	0
[truncated: 29,361 more rows]

## Sheet: Fig 5B raw beads
droplet_area	population_area
77.4912	48.256
27.52	13.9264
455.552	77.1072
24.32	12.7232
124.621	65.6128
63.7696	36.8128
3.6096	0.128
213.683	43.9552
93.7216	50.9952
47.7184	26.5728
44.8768	22.7328
37.376	20.0192
33.2544	17.0496
27.4944	13.056
80.0512	45.7472
26.0096	13.4912
55.1936	27.0336
50.8928	24.32
156.467	78.3104
56.1408	30.6432
38.1184	20.48
28.16	12.8512
26.8288	14.1568
73.7536	43.3152
27.648	13.4912
114.611	64.2304
33.3824	16.8192
31.0784	14.976
117.325	67.0464
94.976	54.1184
22.0928	9.9584
116.07	54.272
32.3584	14.4896
217.958	115.456
27.1872	12.3648
49.3824	27.648
247.578	44.2624
58.1376	33.8176
85.6064	51.5584
26.8288	11.4944
76.1856	40.7808
36.1472	19.8912
28.7488	14.1568
45.6448	22.8608
58.7776	32.128
39.1424	20.2752
46.72	24.448
46.848	27.1104
73.728	42.1632
20.0704	8.0384
33.9712	18.2016
53.7344	29.824
88.9344	49.7664
38.3744	20.9152
99.7376	48.7424
76.416	43.6224
110.31	55.5776
93.4912	53.4784
128.768	67.3792
36.9664	19.9424
29.7472	13.9264
36.3008	18.048
104.09	60.2368
65.28	36.4288
42.9056	21.888
37.2736	20.096
23.8336	13.312
113.075	58.5216
36.9408	20.1728
249.242	64.6144
39.5008	19.7632
33.408	16.64
110.925	62.5664
31.0016	14.4896
46.464	23.808
79.3344	39.5264
34.4064	15.9744
51.2256	25.6
81.2544	43.4944
42.1632	21.6832
34.5856	17.7152
37.1456	18.4832
52.608	29.0816
33.0496	16
44.5952	25.5488
118.938	60.6208
23.936	10.7776
28.5952	14.592
60.6464	33.0752
35.6864	18.3808
36.096	16.2816
26.2912	13.1328
45.2096	22.1184
96.3328	57.344
34.7136	18.5856
48.6656	25.6256
48.8448	25.6256
59.6992	33.5872
55.2448	27.2384
74.2912	35.968
52.2752	28.3392
157.491	86.9888
23.8336	11.136
38.1184	18.4832
45.824	22.0928
26.1888	13.3888
50.7136	25.984
107.418	54.1952
116.966	71.6544
336.538	151.731
19.4304	8.0896
16.7936	7.7824
30.9248	14.7456
25.9328	10.9056
66.9696	33.6896
56.2432	32.4864
54.272	34.4064
60.0832	32
104.218	57.1392
40.0128	21.632
26.2912	12.288
48.3584	24.2176
77.7472	43.52
48.256	27.4176
92.672	48.2304
72.5248	29.8496
60.672	31.616
29.44	13.9264
41.9072	21.0432
35.5328	17.7152
33.3056	16.1792
42.112	22.3744
45.1584	24.0384
37.0432	18.8928
40.1664	18.6368
21.7344	9.6768
33.1264	15.0528
26.752	12.1856
34.048	16.4096
21.504	10.2656
65.2032	34.5856
48.768	27.6736
107.238	56.9856
47.0784	26.3936
56.2176	29.2352
34.9696	17.3056
51.6352	26.5216
31.616	15.7696
69.1456	34.4576
207.77	105.882
40.9856	21.4784
35.8656	17.28
77.952	43.904
50.3808	25.6
91.1104	45.952
45.2608	22.4
88.7296	43.7504
50.9184	26.1376
44.2624	21.6064
25.0112	12.3904
24.576	12.1856
97.536	54.4
71.4496	40.6016
51.2768	26.3424
35.2512	17.7152
39.8336	20.2752
56.448	29.7984
85.6576	43.8272
92.032	44.9792
64.9728	33.6896
40.0384	18.3296
105.702	54.4
63.3088	33.2032
44.8512	23.5776
29.2608	15.0528
32.0256	16.0512
37.9904	19.7888
34.688	18.9952
355.123	197.325
57.3952	31.1808
38.784	19.968
76.032	39.6544
50.9696	25.472
44.6976	21.4528
26.496	11.776
16.0768	5.4272
60.288	30.336
89.9584	46.08
43.4432	21.3504
70.3232	37.2992
34.5856	18.3808
64.4096	37.7856
52.3776	27.9808
105.114	49.408
32.4608	15.7184
48.9216	23.68
33.3312	16.7168
43.7504	23.5776
33.408	16.384
68.7104	35.328
50.1248	24.9856
88.32	50.2784
71.936	36.9664
148.224	66.7136
45.2352	26.1888
25.9584	13.2864
69.2736	39.5008
30.72	15.8976
67.3536	36.5824
41.4464	21.0432
60.6976	32.0768
29.1584	14.3104
75.0848	35.5584
122.035	56.6272
32.6656	16.3328
32.512	16.512
259.994	77.9264
98.9952	48.9216
59.8272	32.7168
40.1664	21.6832
66.1504	34.4064
142.285	63.7184
23.2192	11.2896
59.5968	31.7184
84.1216	42.4192
36.9408	17.3568
99.8144	52.6336
74.7008	36.6848
47.232	24.8576
54.016	27.4944
26.6752	13.0048
27.0592	13.056
72.9856	38.5792
58.0608	31.6672
46.6688	26.4448
66.7392	36.0704
37.1968	19.8144
29.2352	14.336
370.202	175.258
23.8592	12.2624
33.3568	17.5104
26.0352	13.0304
38.656	20.6336
39.0656	20.736
49.1264	26.4192
44.7232	24.8064
69.1456	34.7904
38.784	19.0208
57.0624	32.7168
212.966	115.251
33.9456	18.1248
44.0832	25.984
56.832	32.2304
59.52	33.152
135.936	70.1184
10.6496	1.1264
48.896	23.8592
26.1632	12.9536
60.5696	33.28
77.2608	40.704
25.6256	13.0816
24.32	11.0592
133.53	75.4176
34.56	17.0496
32.8192	17.4848
112.205	52.1728
39.9104	21.5552
73.0368	40.7296
249.754	135.501
44.1856	21.6832
27.3152	14.08
169.139	96.8448
35.9424	18.5088
137.651	71.6544
75.2384	36.864
35.0208	18.1504
192.41	48.9728
103.117	54.528
40.576	21.9136
70.4512	39.168
29.4912	14.2336
24.6272	11.8528
58.1632	32.2816
77.5936	39.6032
25.9584	13.1072
44.7488	24.8832
36.8128	20.5568
78.4896	45.1072
37.248	19.6096
81.6128	46.1056
33.7408	19.072
44.5696	24.0896
119.45	66.7904
27.3664	14.08
59.5712	31.2064
36.2496	18.0224
478.438	89.984
50.4064	25.8048
68.8128	41.0112
104.576	56.4224
37.6064	20.5824
67.1488	36.5568
26.3424	14.08
16.3072	7.4496
63.744	32.5376
96.9728	51.8144
32.6912	18.3296
26.2912	12.6464
158.541	79.1296
1893.32	136.294
270.976	55.8592
38.2976	20.4032
42.0352	22.4256
34.56	16.0512
34.7392	17.3056
38.9632	19.072
92.5184	45.3376
86.8096	49.4336
37.7856	19.5584
46.4384	24.7552
307.866	56.3456
106.266	57.1392
39.68	21.5552
100.096	48.7936
35.0976	18.7136
8.1664	0.8448
21.5552	10.9824
124.288	56.4736
56.832	24.7296
114.099	55.8336
41.1392	21.248
53.3248	28.3648
16.7168	6.7072
23.5264	11.0592
36.0192	19.9424
100.198	47.5136
109.414	57.1136
32.3584	16.9472
40.2944	18.6368
36.1728	18.1248
33.5104	15.3856
379.853	51.456
23.04	9.7024
24.96	13.7472
58.88	29.7216
86.8096	49.2544
36.8384	17.5616
48.7168	25.6768
39.7312	19.3024
79.8464	38.6048
23.5008	11.1104
47.4112	24.0896
26.752	14.1312
38.5792	20.4544
39.1936	18.5856
53.5552	29.2352
91.5968	49.536
61.696	36.0192
28.4928	15.36
106.035	55.5776
26.9568	6.1184
31.1808	14.3616
20.5312	9.7024
44.8	21.4784
98.56	54.8096
59.2128	33.024
41.0112	19.712
49.5872	27.7504
99.1488	54.3232
46.5152	22.784
65.2544	35.584
91.1104	45.4656
34.3552	16.6656
25.0624	11.904
21.5552	11.2128
31.6672	15.3344
44.1344	25.2416
63.0528	31.872
111.437	59.2384
70.8352	34.9184
54.2208	30.5408
21.5808	9.0368
32.64	15.2576
83.9168	47.616
28.7744	13.2352
183.629	59.3408
101.376	48.6656
32.7936	17.1264
10.5216	3.5584
99.3024	43.0848
32.9984	18.9952
32.512	16.6144
50.8416	25.3696
35.5584	19.9424
38.784	19.6864
145.075	66.3552
78.4896	42.8544
75.2128	39.8336
212.454	104.96
23.5264	10.3936
23.552	7.7568
48.4608	24.6272
42.1888	19.1232
32.1024	15.616
80.9728	36.5312
26.624	13.0816
48.9728	26.8032
24.7808	13.44
59.52	32.896
44.9024	25.0112
55.4752	27.9808
42.4448	23.296
26.1376	13.5424
53.8624	31.4624
22.8864	11.2128
36.736	19.2256
25.7536	12.5952
35.3792	18.9184
94.8224	49.2288
77.5936	39.04
27.648	13.8752
39.168	19.0976
77.7728	43.2128
66.2016	36.4032
37.1456	18.8672
49.5616	24.7808
62.5664	32.3584
35.8144	20.0448
34.9952	19.7632
177.869	86.8608
103.04	58.7776
82.0992	45.0048
1755.52	165.043
30.1312	15.6416
50.2528	25.2672
27.1872	14.208
51.456	26.9056
26.2656	13.1584
32.2816	17.1008
27.0592	14.2848
23.3216	11.2128
34.6112	19.7888
24.6528	12.544
37.7344	17.8176
55.808	30.5408
98.048	52.8896
38.8096	18.7136
65.664	33.7152
35.0976	19.0208
34.7904	18.7136
83.7632	44.5696
27.2896	14.9248
49.0752	23.8592
77.8496	41.8816
143.693	62.72
34.7392	18.9696
103.757	57.4976
86.1696	38.5536
41.8048	23.5008
82.2272	43.1616
37.76	18.9952
35.2512	18.048
69.2736	37.504
33.9456	17.1264
182.17	101.53
33.8688	17.8944
81.2288	38.4256
35.9424	20.2496
29.0304	14.976
74.1376	34.2784
25.1136	11.3408
270.541	113.306
61.696	32.9472
22.4256	10.4192
66.1248	33.408
47.2832	25.344
38.8096	20.2752
105.472	57.7792
130.458	54.4256
58.9824	33.8176
70.528	34.0224
34.8928	19.712
22.6304	10.0096
58.2144	30.3104
101.683	48.7168
37.4784	20.9408
26.9568	12.9536
34.56	17.9712
136.755	68.4032
47.8464	27.392
567.424	108.134
33.5872	16.7168
380.621	112.64
92.8768	51.5584
689.152	121.114
64.8704	35.0976
190.029	98.9184
123.546	61.184
39.5008	21.9392
57.1392	31.3856
55.1936	31.2064
39.5008	22.5792
47.3088	27.136
113.664	55.4752
68.8384	35.1488
48.64	28.8768
42.3168	22.3232
86.4512	47.36
48.7936	25.9328
139.853	73.5488
40.832	21.2224
45.1584	23.296
146.355	77.4656
457.062	117.811
37.376	21.1968
37.7344	19.0208
34.7136	19.8656
290.688	33.1776
25.3696	12.0064
143.77	79.36
26.0352	12.5696
53.6064	31.488
66.2784	37.1712
33.28	17.1264
30.8992	14.4384
21.7856	11.264
115.661	58.1376
137.882	72.7808
493.261	87.9872
63.1808	34.4832
68.1216	33.3568
29.9008	15.6672
56.3456	32.256
46.0288	26.752
50.6112	26.2656
58.752	32.256
51.2256	26.8544
44.3904	24.4224
48.2304	27.8272
34.3296	18.432
38.8352	20.3264
51.0976	27.4944
39.5008	21.1712
24.6784	12.1344
80.3584	40.7296
128.563	67.5328
41.8304	22.656
35.968	19.4816
31.36	16.7168
85.2736	45.7216
53.7344	30.464
35.712	20.224
93.824	49.408
54.3744	30.336
39.4752	21.1968
70.5024	38.8352
738.509	90.5472
54.7584	32.2048
37.9648	22.4512
52.608	27.8784
34.9696	20.4032
116.019	60.0576
31.616	14.3872
161.613	85.0176
57.9584	33.28
81.92	43.9808
42.0096	24.6528
64.4352	35.328
55.0144	30.1056
115.661	66.432
65.664	34.944
56.2176	31.8976
37.6832	20.7872
30.8992	15.36
46.0288	24.832
43.2896	25.0112
51.9168	30.0288
37.12	19.6352
28.0832	14.0544
37.0176	20.5824
66.4576	38.7584
32.1536	17.0496
532.685	56.0896
71.5264	40.5248
287.539	134.272
113.331	68.1472
207.667	102.246
25.9328	12.5952
111.206	50.8416
36.2496	19.0464
23.296	11.3408
24.832	11.8272
174.285	87.3984
58.3168	33.6128
25.8816	13.4656
305.741	48.3584
93.0816	48.6912
36.6336	19.84
12.6464	5.4784
116.019	64.8704
37.376	21.248
34.432	19.0976
43.264	25.2928
156.826	87.3728
35.2	20.5824
37.1456	19.6352
177.69	103.731
28.1088	13.3376
38.8096	19.7376
101.146	60.6208
34.5088	18.9696
129.126	76.1856
41.7536	21.7856
143.309	80.7936
88.3968	51.6608
64.3072	35.5072
32.7424	17.28
269.85	134.144
23.552	12.3648
291.379	56.2432
45.0816	24.7296
63.6672	34.688
107.494	51.6352
78.1824	36.5312
55.0912	30.5408
24.9088	13.44
57.7024	31.4624
82.0224	47.4112
31.744	15.5648
37.4272	20.3776
71.424	43.0336
24.2944	12.9536
145.459	86.7072
34.7392	20.7872
85.6576	40.7552
393.267	64.6144
73.5232	43.1104
43.5712	25.344
262.989	131.302
29.4144	15.7184
68.9152	37.5296
62.6176	36.2752
43.2896	24.6784
42.9056	24.9344
100.096	60.0576
30.464	16.3072
26.2912	14.3104
44.4928	25.6768
35.4816	20.992
69.2992	39.8592
70.1952	35.6096
43.2128	25.1904
59.8272	32.4352
84.224	47.7184
46.7712	27.0336
42.7264	23.68
476.902	114.381
45.1584	26.24
31.8208	16.8704
35.7376	20.096
63.7696	36.8896
35.84	20.3264
41.6768	21.7088
33.3056	18.7392
727.706	100.659
81.5104	47.9232
36.8384	21.4016
72.704	32.8448
147.302	65.9456
28.544	15.0016
94.8736	54.1952
51.328	30.6944
70.2464	37.8368
44.7744	26.6752
182.118	84.0192
33.28	19.1744
48.9728	26.624
635.878	58.6752
99.0208	54.9632
50.7136	30.2848
80.384	46.848
55.2704	30.0544
43.6992	25.7792
54.144	32.6144
158.054	87.2448
46.9248	24.6528
44.2368	23.9616
44.9792	25.728
23.7568	12.6464
57.4976	32.7168
65.3568	38.7328
663.04	127.667
35.1744	21.2992
24.7808	14.1056
295.424	80.1792
589.978	122.778
37.3504	22.6304
44.672	25.1392
25.2928	13.4912
210.176	69.4016
48.1792	26.3936
46.208	24.8576
441.062	68.992
757.197	138.496
25.9072	13.568
45.8752	24.4992
117.862	64.1536
37.0432	21.3504
33.8432	20.3008
28.3136	15.4624
80.4864	37.12
197.376	99.7632
35.0464	19.2512
125.824	63.232
76.6208	38.2208
128.64	65.9968
185.37	107.162
37.5296	21.504
27.392	14.8224
114.406	56.8064
26.8544	13.3632
34.2272	17.0496
43.5456	26.24
73.344	43.9296
28.032	13.0816
50.6368	26.624
62.4128	36.6848
114.534	46.208
44.288	24.4736
68.5056	39.0656
94.7456	54.8352
45.1072	26.1376
137.37	68.0448
56.064	33.1776
163.866	84.5568
53.632	31.1808
53.1712	26.5728
34.7392	19.2256
105.165	52.5312
45.0816	26.0096
41.4208	25.9328
54.8096	32.0512
65.1008	36.7616
49.5616	23.0656
39.1168	21.6064
108.493	64.6912
55.0144	30.9504
79.5392	45.824
39.6544	19.9936
24.4224	12.2624
24.6016	13.952
33.8432	18.5856
101.888	57.5744
81.9968	49.3056
81.7152	44.2368
42.3424	25.3952
24.192	12.544
37.4272	20.5568
33.1776	19.712
98.816	48.5888
282.189	48.2816
26.0096	14.848
24.6016	12.7232
40.9088	23.0656
27.392	16.4096
47.616	26.8288
27.1872	15.5136
74.9056	36.3264
186.163	101.12
52.7104	28.9024
35.2512	19.9424
34.944	20.48
62.2592	36.224
149.043	72.2688
97.1008	47.0528
15.6416	7.808
44.8	26.2912
89.7792	51.7888
39.6032	20.1984
60.4928	29.184
50.9184	28.288
15.9232	8.7296
81.5872	37.888
37.4784	20.6336
53.9904	31.104
27.0848	15.1552
43.5968	26.5472
49.152	29.44
60.8	36.096
25.6768	14.2592
79.9232	50.048
33.28	16.3072
378.368	69.248
28.4928	16.4608
63.4624	36.352
47.4368	29.0048
119.475	59.1616
33.024	19.9936
33.9456	20.7872
37.1456	21.3504
108.16	45.4656
33.664	18.432
72.3456	43.0848
65.0752	33.1008
49.5104	26.3168
37.0176	21.9392
73.9072	45.0816
99.584	57.9584
37.7088	19.1232
34.2784	17.2544
133.35	67.6352
32.4096	16.9472
26.2144	9.3696
37.3504	21.4528
78.848	51.6864
60.544	37.376
38.016	22.8864
27.9552	14.1824
29.1584	19.8144
75.776	39.6288
58.8544	35.6096
40.2688	17.3568
101.53	49.152
32.7424	18.0224
80.4096	38.7584
43.52	22.6304
48.512	28.3392
42.4448	24.2688
33.3824	18.2272
148.608	68.4288
55.6288	29.2352
31.8976	18.7136
31.3088	18.8416
147.021	84.5568
45.824	25.984
40.8832	25.1648
70.656	29.2864
106.726	64.7936
134.118	70.528
43.7248	26.8032
22.3744	11.4688
57.7024	28.8512
24.3712	13.5936
82.2016	47.4112
115.738	65.4336
38.0416	21.2224
40.8832	20.0192
99.3536	56.576
63.8976	36.5568
33.4848	20.608
107.238	51.6352
140.058	74.8032
33.3312	20.1216
13.568	6.8096
24.5248	13.696
36.352	21.4016
25.1392	14.3104
50.2784	27.5712
40.4736	21.632
35.9936	21.0176
122.982	52.992
71.808	44.8512
22.9632	12.7744
61.6192	31.0784
119.552	61.184
68.5056	40.3456
25.5488	13.184
32.4608	18.7136
72.9344	45.1072
45.4656	23.168
34.2784	20.3008
24.832	12.288
71.6544	36.224
127.155	70.2976
48.2048	28.6464
52.6592	32.64
56.8576	32.1536
55.1424	28.288
87.4752	56.2688
108.109	65.3056
39.8592	24.7552
24.6016	13.3888
22.4768	12.9024
44.4928	24.4224
14.2592	7.3216
141.286	81.408
40.5248	24.2688
68.608	41.3696
48.1024	28.2624
31.5904	18.4832
32.64	18.6368
31.2832	16.3328
86.7328	47.6928
237.44	36.6592
48.3584	28.16
84.4544	37.7344
55.296	33.28
25.1904	13.44
33.2032	19.1232
66.5856	40.832
32.512	18.3296
33.5872	20.4288
43.5712	24.5248
22.7584	11.9552
41.6	26.8032
22.5024	12.6464
29.824	19.0208
22.2464	14.6432
19.1232	11.2896
10.5216	4.48
7.0656	1.3824
117.427	52.9152
22.784	13.184
10.9824	3.968
11.5968	5.8368
26.4448	15.7952
20.0448	11.0848
176.41	25.2672
26.88	15.6928
6.7072	2.2784
55.7056	31.3344
48.9216	30.0032
31.1552	17.92
23.296	10.7264
19.1488	8.9344
32.6144	20.608
89.7536	38.4768
153.139	80.896
25.0112	14.1824
40.4736	22.784
39.0912	22.9376
56.2176	28.032
22.0416	12.3136
38.0416	23.3728
53.6576	33.024
29.9776	13.7216
33.92	17.4336
44.8	23.552
26.1632	14.5664
41.4464	25.3952
98.2528	50.5088
62.1824	28.288
45.44	25.7792
45.312	27.5456
34.8928	20.096
140.39	76.1344
53.4784	24.9344
60.8768	29.1072
55.9872	30.7968
33.4592	20.5056
25.728	14.976
27.0336	12.9024
32.6656	19.968
44.4416	27.4432
39.8336	23.0912
84.1728	51.7376
45.2352	27.3664
83.9168	45.2608
42.752	22.9376
62.1568	35.1488
24.704	12.928
53.9136	31.8208
38.8864	25.4464
8.8064	3.8912
36.2752	20.3264
67.0976	40.0896
57.6	36.5568
33.7152	20.5568
12.9024	7.1168
91.136	50.0224
66.7648	41.8304
22.2464	11.1616
312.064	66.816
52.0192	29.2864
66.304	37.9136
57.7024	29.3888
41.984	26.1888
64.4096	38.8096
192.589	107.75
51.3024	28.2624
92.544	43.008
54.4512	28.7488
25.9072	12.7232
38.5024	23.9616
44.0832	27.52
24.2176	13.0048
45.2352	27.4944
31.36	19.7376
23.552	13.2096
65.5872	40.064
24.3712	11.4944
322.867	60.544
53.6064	33.6128
29.7728	15.2576
143.309	77.2096
26.6752	14.4896
28.2368	16.5376
68.2752	42.624
52.352	33.0496
31.5136	20.5824
72.064	41.4976
24.6016	13.7728
64.8704	40.6016
65.6896	38.3744
35.1232	19.6864
27.5456	14.1824
22.8608	13.4144
32.6656	20.4544
28.4928	15.1296
41.3696	27.3664
33.664	20.0192
44.9536	26.1376
48.0768	31.2832
120.755	67.2512
13.7216	7.3728
83.2256	50.3552
1082.55	62.2336
51.4048	32.5376
610.714	55.2448
68.2496	36.5824
44.4928	28.1344
70.2464	41.1136
25.4464	14.592
332.416	31.2832
96.6912	49.9968
28.6208	15.616
67.2512	41.7536
74.9568	37.5552
101.299	52.224
39.5264	21.7088
75.264	48.9216
63.872	31.36
73.1648	41.2928
31.7696	16.8192
879.027	172.672
79.9232	48.128
42.752	26.9056
26.5728	13.44
711.629	64.0512
80.8192	44.6208
62.2848	29.5168
39.7056	24.0896
133.709	74.9312
726.554	97.4848
2165.22	91.904
53.504	33.4592
46.8736	25.8304
47.7696	29.2096
63.9232	35.2512
59.3664	35.9168
59.5456	28.7744
409.498	39.552
36.992	20.3008
31.488	15.872
29.5936	15.4112
80.7168	40.7296
52.096	25.3952
48.8448	23.7056
87.3728	51.8144
38.2976	20.1728
121.216	59.8528
35.0208	15.5648
17.1264	7.9616
24.96	12.5184
32.896	17.0752
23.1424	11.5968
38.0928	18.6368
18.1248	7.808
20.608	9.344
26.1376	13.2096
58.3936	32.9984
24.8576	12.672
1587.15	93.6704
37.7088	19.2512
23.6544	11.8784
31.9488	15.4368
10.9568	4.3776
25.8304	13.2864
68.3008	39.5008
72.3456	34.1248
58.496	34.1504
50.304	24.32
48.8448	27.4176
44.672	23.168
40.9088	22.7584
34.2784	19.2512
91.5968	47.0528
32.5376	15.6416
45.44	26.6752
49.2544	29.0304
51.4816	23.4752
850.406	94.8992
71.1936	43.0336
40.5504	20.864
61.6704	34.9184
38.6816	20.48
42.0096	23.7568
91.4432	52.6592
398.515	92.8512
156.186	45.2352
45.3632	25.8304
101.222	55.0912
26.112	14.2336
24.0128	11.8784
30.6176	14.6944
64.5888	31.7184
29.9776	14.6176
10.3168	3.1744
221.491	34.9184
35.6864	20.4544
23.0912	11.52
13.7216	5.9648
79.5136	41.6256
33.1264	18.2528
68.1984	40.1664
42.4704	24.2176
46.8224	28.5184
60.2112	34.2272
106.342	50.2784
61.5168	39.424
31.9744	17.0752
49.7152	23.5264
32.8448	16.4864
33.4336	19.0464
32.9216	18.8928
36.3008	20.5568
148.506	75.52
14.1568	7.168
39.68	21.4016
426.982	54.4768
119.578	64.0256
24.6272	9.8304
118.963	61.2352
31.5136	18.8672
76.3648	45.1584
41.3952	24.2688
45.7472	23.3984
31.6928	17.0752
23.6544	12.0832
21.5552	13.3888
93.7984	42.8032
55.808	33.6896
48.3328	25.856
242.765	24.32
48.9216	26.8544
1371.98	126.746
219.904	34.3552
651.93	93.8496
228.634	51.5072
183.424	88.9088
34.0224	15.8464
664.883	47.7952
45.5936	26.8544
48.1536	30.1824
76.544	44.6976
810.726	39.1936
83.6096	40.576
137.011	62.6688
237.926	33.5616
101.018	55.5776
32.768	18.7392
12.544	6.4
4483.48	145.92
40.4992	21.7856
10.2144	5.1968
53.9392	32.1536
43.8784	24.4224
10.9824	4.4288
34.5344	17.6896
34.7136	21.4016
33.024	18.4576
49.0496	25.8816
41.6512	25.7792
68.5056	39.808
24.7296	14.0032
15.6416	7.424
200.474	88.2688
43.5712	25.1648
376.269	73.6
31.616	16.9984
41.4208	24.4992
2026.44	68.5824
20.1984	10.2144
1519	52.3008
1435.44	89.4208
46.9248	24.6784
36.5056	19.6096
510.387	33.024
33.92	16.128
47.8464	24.32
36.4544	20.5568
687.693	23.1424
21.888	11.2384
19.7888	10.5728
36.5824	19.84
43.1104	23.2192
56.2176	28.9792
30.6688	19.3536
128.23	69.4016
33.92	18.2528
33.4336	17.6896
79.6928	41.2672
55.3728	28.9024
90.3168	56.3712
53.5296	32.0768
39.9616	22.272
22.7584	11.3664
33.3056	18.7648
30.6688	16.6656
38.2208	19.5584
7707.01	242.048
58.3424	35.4304
33.6128	19.5072
20.8128	10.5728
24.9344	13.0816
35.3536	18.8672
219.827	46.4128
82.3296	39.0912
703.514	39.1936
25.1904	13.2864
1031.94	77.4656
50.1248	26.3936
44.288	23.7824
3828.94	57.8304
29.1584	14.4128
25.5744	13.6448
89.7792	59.3152
32.4096	19.2
33.536	18.0992
22.6304	11.4176
25.9584	12.8256
4451.25	70.6048
1165.47	39.7056
46.4896	26.0864
39.9872	18.7392
13.824	6.3488
32.6656	16
79.0528	46.9504
22.0928	10.1888
4667.7	101.222
28.7488	13.5424
28.1088	14.464
47.744	28.7488
26.368	13.0816
54.0928	21.8368
40.8576	21.9648
17.8176	6.2976
42.7008	20.992
71.7568	38.9376
1065.27	83.0464
55.1168	31.0528
224.563	148.07
29.8496	15.1808
35.0464	17.2544
27.1872	14.0544
29.0304	15.0784
444.006	33.024
37.2224	21.1456
1911.19	80.4352
1003.44	9.344
27.5712	14.4128
33.664	18.6112
39.808	21.248
45.2352	23.8336
953.088	105.088
30.2336	14.2336
21.5552	10.496
3127.04	117.018
28.6208	14.976
23.808	11.6736
315.904	44.2112
102.298	51.8912
20.7872	10.1632
69.632	46.5152
18.1248	8.2432
1163.57	23.552
78.0544	33.4336
52.8384	29.0048
34.1248	17.3824
13.7472	6.4768
37.2224	19.6096
37.12	17.8432
53.0176	29.0816
22.5024	10.9824
28.288	13.3632
71.3216	25.8304
38.6816	19.7888
31.3344	16.384
50.0736	26.9824
61.44	30.9248
36.864	19.6864
22.144	10.8544
51.3536	26.3424
30.1568	16.128
369.51	10.1888
46.0032	24.8832
71.8592	40.704
50.9952	25.088
27.0336	13.5936
1597.11	72.9088
2608	81.024
33.1264	18.2528
269.261	16.128
42.88	20.6848
74.0864	42.2912
22.016	10.7264
19.84	9.856
22.5024	10.88
229.581	48.8192
40.0128	21.7856
32.0512	17.5616
35.456	20.9408
31.3088	16.128
32.9472	17.5616
30.1312	15.6928
29.4656	15.5392
670.925	39.9872
31.616	17.4592
409.856	46.4384
436.454	42.0864
22.2464	11.136
561.357	61.9776
20.7872	10.2912
4181.58	101.248
35.6608	19.2768
121.83	27.392
218.368	44.6464
2008.76	122.598
30.8736	16.3072
39.8336	19.2512
45.6192	25.9584
23.552	12.2368
79.6416	41.1904
677.939	31.5136
30.2848	16.384
20.1728	10.2656
615.962	21.3248
34.7136	18.9696
43.4944	24.8064
30.976	16.9472
35.712	21.1968
55.296	25.1904
46.0032	23.9616
31.3344	15.488
984.371	72.4992
41.4976	23.2448
70.4	38.7584
1516.13	111.821
618.112	54.6304
22.5024	11.1104
470.758	40.6272
23.3472	11.9296
50.432	28.672
29.9264	14.7712
21.4784	10.9568
1615.31	113.28
48.9984	29.7984
226.099	8.7296
22.528	11.2128
13.3376	6.912
31.36	17.3824
22.9888	11.6224
30.336	16.256
40.576	22.7584
29.0048	15.616
29.9008	16.6656
32.6656	16.1536
23.1168	11.8272
42.0352	22.016
26.3424	12.3648
29.6448	17.0496
282.086	32.64
38.3744	12.7488
122.982	26.4704
520.653	93.0816
35.456	15.3344
663.552	54.6048
82.5344	38.272
3096.52	16.2304
206.976	25.7536
26.7008	13.4912
24.3712	11.1872
39.2192	20.1728
37.6576	8.9344
36.9152	18.9696
26.4704	12.4416
43.52	22.5024
44.5952	23.1936
24.1408	11.1616
498.995	72.1408
37.2224	19.8656
15.2832	6.912
2489.06	112.896
472.909	34.9184
20.736	9.8048
67.7888	40.5248
424.448	22.5792
139.418	34.8416
5889	67.8912
17.4336	8.6272
62.0288	33.2544
24.2432	12.1856
220.979	24.448
281.702	31.5648
46.7968	25.856
41.7792	22.144
76.416	30.5152
27.7504	14.72
695.168	43.264
30.2336	16.0768
35.328	17.0496
31.2832	16.8448
1271.65	42.8288
41.4464	21.9648
56.9344	28.5696
16.9728	8.1408
22.1184	11.3152
33.92	18.1504
46.2592	25.8048
17.3312	8.8064
9.3184	4.6848
32.4864	16.8192
92.5696	48.9472
458.24	29.6192
30.8224	13.0304
33.92	18.4832
40.7552	24.1408
1111.07	17.6896
49.8688	27.0336
31.4368	16.4864
27.904	15.2576
308.147	45.7216
23.9872	12.16
31.8976	17.1008
480.589	48.5888
26.3424	14.208
9.8304	4.736
1127.19	36.8384
25.1648	13.7216
352.384	41.728
27.2896	14.5664
226.099	22.9376
4259.05	44.7232
1372.52	86.0416
2987.03	114.253
12.8256	6.5536
26.5984	13.1584
22.3744	11.3408
22.6048	12.16
28.6976	12.0832
33.28	16.8192
35.5584	18.9952
16.2304	8.4224
349.952	30.7712
22.8096	11.5712
50.6112	19.712
507.238	37.5808
314.726	17.1776
36.5312	20.1472
19.6608	10.2912
36.1984	20.4544
12.5696	5.1968
39.3472	21.7088
46.9248	25.7536
18.56	9.6768
767.846	8.96
397.107	21.3248
29.6704	15.0272
682.419	21.888
16.896	8.8832
34.5856	18.5088
47.3856	25.7536
171.264	22.5536
20.3776	10.1888
128.358	12.544
33.408	18.944
5.888	2.5344
3008.64	36.4288
366.285	5.632
1157.04	35.8656
505.088	15.2832
137.856	8.7296
84.1728	6.1952
32.6144	17.9456
38.1696	21.5808
28.3136	15.36
27.8784	13.8496
10.752	5.4528
10.3424	5.4272
367.923	28.9536
45.312	23.808
19.9936	10.2656
42.6496	22.9888
107.494	15.9744
42.3936	23.4752
1205.89	33.9712
117.427	14.336
32.5376	17.536
1599.74	40.192
34.5344	17.6128
49.9968	26.8288
1997.93	47.4368
25.8048	13.1072
28.2368	14.2848
28.288	15.5648
3225.27	110.925
25.7792	12.9792
19.1232	9.8304
126.95	74.1376
20.7872	11.4944
259.046	18.2016
68.2752	37.3248
10.2912	5.1712
21.2224	10.9056
21.888	11.2128
4293.02	67.968
2381.47	123.366
29.8752	16.0512
38.3488	20.608
10721.5	188.928
42.1632	22.3232
24.1408	12.6464
21.1456	10.112
26.4448	12.2112
21.0432	10.0352
25.8304	11.264
28.6208	13.3376
53.76	28.8
395.571	15.4624
12.4416	0
19.1488	8.6528
48.128	27.5456
49.5104	27.7248
10.3168	4.8896
29.1072	15.4624
226.099	13.312
717.67	40.96
366.618	12.0064
93.2864	51.8144
608.845	65.3312
118.579	20.9408
410.957	2.56
19.84	9.8304
30.4128	3.3024
4746.96	18.6112
62.6944	29.9008
17.1264	8.3712
11.136	4.608
39.7056	19.6608
256.819	19.84
226.099	14.976
635.187	35.0208
424.781	31.8976
327.731	12.5184
717.747	44.3648
8847.16	98.4576
14.1056	6.912
24.2944	12.7232
19.2512	9.6512
29.44	13.9264
19.0976	8.9088
16.6912	8.448
36.608	20.5824
28.2112	12.9024
23.6288	10.7008
17.6384	8.8576
22.1952	10.752
39.7312	19.968
32.1536	16.2816
20.0192	10.368
1549.75	36.9152
226.099	23.1936
27.1616	14.208
8.8064	4.4288
18.9184	9.4208
11.1104	5.7856
43.264	23.7824
12.1344	6.3232
12.7488	5.2224
17.8432	9.1648
20.3008	10.3936
1935.16	2.8928
1981.21	33.1776
6896.23	101.632
160.922	9.1392
19.0976	9.7792
25.9328	14.3104
1205.96	54.0416
354.33	24.5504
650.803	34.816
27.7504	14.8992
21.8624	10.7776
38.7584	19.712
63.1552	37.8624
26.6496	15.3344
25.1904	13.1072
44.288	25.4464
427.827	20.7872
9.216	4.7872
31.5136	17.4592
24.7552	12.416
21.1456	11.264
9.5232	4.864
26.624	14.6176
23.0144	12.416
26.2656	14.3616
508.493	26.112
26.496	14.336
18.2016	9.3184
35.6096	15.36
15.4368	8.5504
74.1632	44.0576
19.9168	10.2144
8594.48	117.402
7.3472	3.3792
539.622	29.4912
17.6896	8.704
252.544	23.6544
23.424	12.5696
21.7088	11.0848
230.963	21.9392
8.32	3.4048
39.3472	21.6576
13.8496	4.3776
2877.88	65.4336
229.862	24.4992
16.9984	8.832
39.8592	21.504
30.3616	16.3328
29.9008	16.7168
378.24	12.6976
307.021	21.2224
23.9616	13.4656
27.52	15.232
18.048	9.2672
26.3424	14.8736
14.2848	7.2704
18.6624	9.9328
19.4048	9.8304
51.8144	26.8032
40.0896	22.144
395.776	19.712
46.08	22.5024
26.0608	13.9776
5805.75	104.781
17.8944	8.704
34.5856	18.3552
17.2032	9.1392
2467.4	94.7712
22.7328	11.008
228.429	28.6976
17.5616	8.192
17.408	8.192
15.5648	8.0384
25.9328	14.3872
18.688	9.7536
21.9904	10.9568
17.9968	9.5488
30.8224	16.64
18.1248	9.1136
11.6224	5.7344
18.1504	8.4992
226.099	15.5392
10.4448	5.1712
1838.64	28.7488
26.368	13.8752
41.1648	5.9392
33.3568	16.7168
10.5984	4.3008
23.4752	11.648
20.6336	9.984
434.304	12.8768
26.5216	13.7472
18.2784	9.1904
10.7776	1.5872
27.0592	13.8496
30.0288	16.2304
25.7792	12.0832
231.782	15.8464
1268.71	20.7616
25.8048	7.2704
46.3616	24.8832
382.336	17.4592
21.7856	10.624
28.6208	14.72
15.2576	7.0656
35.328	17.6896
226.099	17.5872
9183.85	175.36
17.9712	9.3696
21.9392	11.9296
766.182	1.8688
36.352	19.5584
11.8784	5.4272
14.4128	7.3216
25.6	13.9008
21.1456	10.4192
340.582	24.3456
57.7792	22.2976
46.6688	22.7072
31.3088	15.9488
16.4608	8.5248
850.381	19.5328
19.584	9.4976
34.1504	20.5312
612.326	5.9136
17.3312	4.8128
32.768	16.3584
13.7472	6.0416
22.7584	10.9824
7.68	3.6352
445.568	10.0096
29.9264	15.3344
18.0224	9.5744
8.2688	4.6336
22.528	12.6208
26.88	13.4912
890.24	49.1008
309.581	24.576
47.104	23.3728
316.288	17.4336
15.5392	7.5776
7.2192	3.6096
17.7664	9.1904
35.84	18.1504
32.6656	18.5856
312.474	13.7472
10.0608	5.3504
21.2992	10.6752
394.854	3.456
226.611	42.0608
10.0864	5.2736
1874.69	52.4032
451.686	25.8304
42.6496	24.4992
20.6592	10.0608
18.4576	10.6752
40.2432	21.3504
460.365	19.6352
16.384	8.8576
9.2928	4.9152
3395.58	21.9648
28.7232	16.896
51.6352	31.36
45.6192	22.6048
47.4624	26.9568
17.6896	9.4464
24.6016	14.208
37.6064	22.2464
29.3632	12.1856
19.2512	10.1888
9.7024	5.2224
280.141	13.2864
13.7984	7.296
13.6192	6.912
3731.84	88.9088
23.168	13.0816
33.664	18.3296
7.7568	4.1984
8.0128	4.0192
13.4144	7.424
9.1648	4.7872
6.9888	4.1728
9.1648	3.6864
14.7968	8.2432
12.7488	5.7088
15.4368	8.064
1053.34	29.3888
16.9216	9.3184
4.8896	0
15.4368	8.2432
1705.93	46.592
54.2976	29.3632
5.0432	0.4096
5.8624	0.4096
5.12	0.0256
25.7024	4.352
7.68	4.352
7.4496	4.352
8.7808	4.9408
10.752	5.6576
14.592	7.7824
12.544	5.76
30.6432	15.9488
358.733	20.4544
30.0032	16.0768
25.2672	13.696
7885.82	117.862
518.656	12.544
8.0896	4.5056
226.099	3.5072
6.2208	3.1488
30.2336	10.9568
35.6864	19.456
23.6544	12.1856
5.8112	2.1504
9.344	4.224
47.1296	25.6512
11.1616	2.2784
18.9952	9.2672
599.501	11.904
29.4912	15.6416
1271.01	18.0224
16.7936	9.1648
30.336	15.232
2.8928	0
24.32	13.7728
8.1664	4.5056
8.2432	4.1984
12.8256	2.9952
28.8768	0
76.8	17.4336
36.7104	19.3024
27.6992	14.976
15.5136	2.2784
6.528	0
9.216	0.3072
6.7584	3.4816
10.88	1.5872
31.8976	18.1248
14.336	7.7568
29.1072	0
1087.05	37.8368
24.064	12.2624
4.8128	0
9.088	3.2256
9.088	5.0176
35.6864	11.4432
13.4656	7.168
29.696	14.9504
12.5696	6.3232
110.438	56.2688
22.656	11.1104
11.0592	5.6832
23.9872	13.3888
8.9344	4.8384
1375.67	28.2112
10.0864	0
6.3232	0.5376
12.9024	6.784
17.8944	2.9952
619.597	31.0272
22.6048	11.008
16.6912	0
36.352	4.7104
4.9408	0
17.7152	9.088
28.5696	14.3872
5.1968	0
9.5488	4.0448
49.3056	22.4
15.36	0
35.0976	17.1776
4.096	0
9.856	5.1456
19.2256	0
8.0384	4.2496
6.0928	0
5.376	0
24.0384	12.6464
8.8832	4.5824
7.6032	3.7632
31.8464	18.2272
3.712	0
21.0688	10.752
9.5488	4.9664
18.8672	9.344
153.216	26.6496
28.416	14.8224
677.427	25.1136
9.5744	0
10.8032	5.4272
29.312	16.5888
9.9584	5.376
18.5088	0
8.704	4.48
4014.95	66.7648
867.149	4.4544
19.5072	1.28
26.9824	14.1568
15.8464	8.1664
11.2896	0
25.2672	0
9.9072	0
17.1264	8.7296
9.344	4.864
7.808	0
8.6016	4.5824
5.6832	0
7.2192	0
18.1504	9.1136
17.8688	4.7872
8.8064	4.5824
2708.61	41.9072
13.2608	0
133.325	41.4976
6.2208	3.3792
22.8096	12.5184
137.37	6.4768
5.9904	3.1232
15.5648	8.192
6.272	3.328
789.837	48.6912
15.744	2.4832
5.0432	0
18.688	9.9072
4.7616	0
17.8432	1.1008
24.4736	10.2912
6.4	3.7632
187.315	92.3648
14.5408	7.3216
18.0224	7.1424
6.016	1.0752
45.2864	27.7248
29.6192	15.5136
12.0576	1.3824
5.888	0
6.8096	3.5328
72.8064	22.8864
1444.99	30.208
79.2064	17.92
8.064	0
11.8272	5.7344
18.7904	9.8816
4887.35	103.45
508.314	14.2592
233.574	23.5008
11.6224	6.0928
5.8112	2.5856
6.784	3.9424
9.9328	5.4272
18.9696	10.1632
8.96	0
4.7616	0
1052.36	22.5024
23.3216	12.4416
9.6	5.2224
19.9424	10.4448
32.5376	4.1216
508.826	16.3072
41.1648	15.6416
19.328	10.8288
4.48	0
10.8032	0.8448
5.9136	1.5872
136.474	32.128
20.0704	10.9312
68.1984	2.7136
17.152	9.0624
9.216	4.7104
18.2784	10.9568
19.84	10.5216
13.7216	7.7824
13.9264	8.1152
226.099	8.576
14.3104	8.1664
10.0096	0
29.4144	15.5648
15.488	8.4736
19.6096	8.192
20.0448	2.944
8.3968	4.5056
16.5888	8.6016
1293.21	18.9952
16.3328	8.8576
23.7568	13.7984
468.941	193.613
22.2464	12.928
12.3136	6.1952
19.3536	9.3952
15.3088	8.6016
5.3248	0.5632
17.6896	9.2928
11.6992	6.2208
210.15	59.8272
17.2544	10.112
25.2672	11.264
10.752	5.6576
14.08	7.3472
20.3776	11.2128
29.4144	14.8736
5.8368	1.3056
8.32	3.9936
11.2896	5.76
24.064	0
6.2976	2.2784
30.7712	0
13.2864	6.7328
15.872	8.7552
15.1808	3.4048
5.504	1.0752
13.5936	7.4752
17.0496	2.8928
8.8064	4.4288
29.312	12.8256
3.8656	0.4608
49.6128	31.0528
28.1088	15.232
[truncated: 4,690 more rows]
