# Supplementary material for: Bacterial survival in microscopic surface wetness
Source: eLife journal article supplement (doi:10.7554/elife.48508), 2019-10-14
Supplement: supp [file elife_poa_e48508_Figure_3_figure_supplement_5_source_data_1.xlsx]

## Sheet: Sheet1
a506 yfp M9-salt concentrations											a506 yfp nacl concentrations										KT2440 M9-Salt Concentrations											kt2440 yfp nacl concentrations
	Time	M9-Salts X2	M9-Salts X1	M9-Salts 5X	M9-Salts 10X	M9-Salts 20X	M9-Salts 30X	M9-Salts 40X				Time	NaCl 10mM	NaCl 100mM	NaCl 500mM	NaCl 1000mM	NaCl 2000mM						M9-Salts X2	M9-Salts X1	M9-Salts 5X	M9-Salts 10X	M9-Salts 20X	M9-Salts 30X	M9-Salts 40X				Time	NaCl 10mM	NaCl 100mM	NaCl 500mM	NaCl 1000mM	NaCl 2000mM
30	0.5	0.097	0.0943333	0.103	0.108667	0.106667	0.110333	0.1815			30	0.5	0.0906667	0.0963333	0.105667	0.107667	0.106333				30	0.5	0.0946667	0.0936667	0.110667	0.123	0.119333	0.103	0.0903333			30	0.5	0.0916667	0.0956667	0.105333	0.1	0.101333
60	1	0.0966667	0.0943333	0.100667	0.110667	0.104667	0.117	0.18			60	1	0.0923333	0.097	0.104333	0.108	0.107				60	1	0.0933333	0.0933333	0.113667	0.126333	0.120333	0.105667	0.0926667			60	1	0.0946667	0.0956667	0.106333	0.1	0.102667
90	1.5	0.096	0.0933333	0.100667	0.110667	0.107667	0.120333	0.1805			90	1.5	0.093	0.097	0.104	0.107667	0.107667				90	1.5	0.0946667	0.0916667	0.113333	0.127333	0.112333	0.106333	0.0953333			90	1.5	0.095	0.095	0.107	0.1	0.119333
120	2	0.096	0.094	0.101	0.112	0.110333	0.121	0.1815			120	2	0.0943333	0.099	0.103	0.109	0.109667				120	2	0.095	0.096	0.113667	0.121667	0.112333	0.108667	0.0943333			120	2	0.096	0.096	0.109	0.1	0.118667
150	2.5	0.096	0.0963333	0.102333	0.112667	0.114333	0.122	0.179			150	2.5	0.0963333	0.0976667	0.102667	0.11	0.108333				150	2.5	0.0986667	0.0983333	0.116667	0.121667	0.115667	0.108667	0.0963333			150	2.5	0.095	0.097	0.108333	0.1	0.114
180	3	0.0996667	0.0993333	0.102333	0.112667	0.119667	0.124667	0.171			180	3	0.098	0.099	0.102333	0.109333	0.108				180	3	0.100667	0.0996667	0.116	0.119667	0.127667	0.108667	0.0963333			180	3	0.0973333	0.0976667	0.108667	0.1	0.111
210	3.5	0.104667	0.104667	0.103	0.114333	0.121333	0.129667	0.1665			210	3.5	0.100333	0.100667	0.102333	0.109333	0.108667				210	3.5	0.103333	0.101	0.119	0.118333	0.136333	0.11	0.097			210	3.5	0.100333	0.101667	0.111333	0.1	0.109667
240	4	0.111667	0.111	0.103667	0.114667	0.121333	0.129333	0.1605			240	4	0.103	0.103333	0.101667	0.109	0.108667				240	4	0.11	0.107333	0.120333	0.116333	0.140333	0.110667	0.0983333			240	4	0.105	0.106333	0.109333	0.1	0.108333
270	4.5	0.118333	0.124333	0.104333	0.114667	0.115667	0.127667	0.172667			270	4.5	0.108333	0.106667	0.101667	0.108	0.105667				270	4.5	0.145667	0.131	0.120333	0.119	0.144667	0.111	0.0983333			270	4.5	0.111	0.109333	0.11	0.1	0.107333
300	5	0.129	0.133333	0.103333	0.115333	0.120333	0.125667	0.172667			300	5	0.12	0.112333	0.102	0.108667	0.108				300	5	0.198	0.153333	0.121333	0.120667	0.143333	0.111	0.0973333			300	5	0.133333	0.111333	0.112667	0.1	0.106333
330	5.5	0.14	0.142	0.106	0.118	0.123333	0.125667	0.172			330	5.5	0.131	0.123	0.102333	0.109667	0.108				330	5.5	0.195	0.150333	0.123667	0.119333	0.142667	0.112667	0.0996667			330	5.5	0.149667	0.118	0.118667	0.1	0.105333
360	6	0.147667	0.145333	0.105667	0.117667	0.122667	0.126333	0.171333			360	6	0.138	0.129	0.103	0.110333	0.107333				360	6	0.185	0.149333	0.128667	0.119333	0.143333	0.114333	0.0996667			360	6	0.15	0.131333	0.121	0.1	0.105
390	6.5	0.149333	0.146667	0.108333	0.118	0.126	0.129667	0.171667			390	6.5	0.141667	0.14	0.103333	0.111333	0.107				390	6.5	0.178	0.149	0.138667	0.117	0.141333	0.113667	0.102			390	6.5	0.149667	0.145	0.122333	0.1	0.104333
420	7	0.149667	0.148667	0.108667	0.117667	0.126667	0.128667	0.170333			420	7	0.142667	0.156	0.104	0.111667	0.107				420	7	0.177333	0.149333	0.144667	0.118667	0.142333	0.122333	0.101333			420	7	0.149667	0.147333	0.123	0.1	0.103333
450	7.5	0.150333	0.149	0.112667	0.118	0.127333	0.130667	0.165333			450	7.5	0.144	0.163	0.104	0.110667	0.108333				450	7.5	0.176333	0.149667	0.155	0.116667	0.141667	0.133667	0.1			450	7.5	0.15	0.148	0.123667	0.1	0.103
480	8	0.15	0.150333	0.113	0.117333	0.127	0.131	0.167667			480	8	0.145	0.167667	0.104	0.109667	0.107				480	8	0.176	0.150333	0.164	0.116333	0.141333	0.149667	0.103			480	8	0.149667	0.149333	0.124333	0.1	0.102333
510	8.5	0.150333	0.152	0.117667	0.117	0.127	0.129667	0.17			510	8.5	0.146	0.172	0.105333	0.109333	0.104333				510	8.5	0.178	0.151333	0.174667	0.116667	0.142	0.124	0.1			510	8.5	0.15	0.151333	0.126333	0.1	0.102
540	9	0.150667	0.153667	0.124	0.116333	0.128667	0.130333	0.170667			540	9	0.147	0.176	0.106	0.109667	0.104				540	9	0.180667	0.152333	0.186333	0.117	0.141333	0.116	0.102			540	9	0.150667	0.152667	0.128	0.1	0.101333
570	9.5	0.151333	0.155667	0.127667	0.117333	0.130333	0.130667	0.169667			570	9.5	0.148333	0.180333	0.106	0.108667	0.104333				570	9.5	0.182667	0.154	0.202333	0.116667	0.141333	0.119	0.0996667			570	9.5	0.151	0.154333	0.134333	0.1	0.101
600	10	0.151667	0.158333	0.133333	0.115333	0.129333	0.129	0.162			600	10	0.149333	0.185	0.107333	0.106333	0.104				600	10	0.186333	0.155333	0.206667	0.117	0.140333	0.134	0.104			600	10	0.151	0.156333	0.141	0.1	0.100333
630	10.5	0.152667	0.160667	0.14	0.114	0.131	0.128333	0.171333			630	10.5	0.151333	0.189667	0.108333	0.107	0.103333				630	10.5	0.188333	0.156667	0.208	0.116	0.141	0.117	0.105333			630	10.5	0.150667	0.157667	0.149333	0.1	0.1
660	11	0.154	0.163667	0.149667	0.114	0.13	0.128667	0.169333			660	11	0.152667	0.194667	0.110333	0.107	0.104333				660	11	0.191333	0.159333	0.209	0.117667	0.142	0.117	0.102			660	11	0.150667	0.16	0.158	0.1	0.0993333
690	11.5	0.156667	0.167333	0.173333	0.113667	0.131	0.136667	0.167333			690	11.5	0.155	0.200667	0.111667	0.107	0.104667				690	11.5	0.195333	0.161333	0.209	0.117667	0.143	0.117333	0.109667			690	11.5	0.151	0.162667	0.167333	0.1	0.0993333
720	12	0.159333	0.170333	0.201333	0.115333	0.130333	0.129	0.167			720	12	0.156667	0.207333	0.112667	0.107333	0.104333				720	12	0.198667	0.163333	0.209333	0.116333	0.143333	0.137333	0.103			720	12	0.151	0.165333	0.176333	0.1	0.099
750	12.5	0.163	0.174	0.215	0.112333	0.131	0.130333	0.165			750	12.5	0.159333	0.213	0.114667	0.108	0.104333				750	12.5	0.202333	0.165667	0.209667	0.118333	0.143	0.125333	0.115			750	12.5	0.151	0.167667	0.186667	0.1	0.0986667
780	13	0.166333	0.177667	0.221	0.111667	0.131	0.130667	0.167			780	13	0.161333	0.219667	0.115	0.108333	0.104333				780	13	0.205333	0.167667	0.211333	0.119667	0.143333	0.118667	0.105			780	13	0.151	0.171	0.198	0.1	0.0983333
810	13.5	0.169667	0.181	0.226333	0.113	0.131	0.133667	0.167333			810	13.5	0.162667	0.226667	0.117667	0.109333	0.104333				810	13.5	0.208333	0.169333	0.212	0.118667	0.143667	0.118333	0.105667			810	13.5	0.151	0.173	0.207667	0.1	0.098
840	14	0.173	0.185	0.230667	0.115667	0.131333	0.132	0.167333			840	14	0.165	0.233	0.119333	0.109667	0.104				840	14	0.211333	0.172	0.213333	0.120667	0.143667	0.119	0.106333			840	14	0.151	0.176333	0.215333	0.1	0.098
870	14.5	0.177	0.189	0.234667	0.113333	0.131667	0.130667	0.168667			870	14.5	0.167333	0.241667	0.122	0.110333	0.104				870	14.5	0.215333	0.174	0.215	0.118333	0.143667	0.119333	0.104			870	14.5	0.150667	0.178667	0.223667	0.1	0.0976667
900	15	0.181667	0.193333	0.239	0.115333	0.131667	0.131333	0.167			900	15	0.17	0.250333	0.124	0.111333	0.103667				900	15	0.219333	0.176	0.216667	0.118	0.143667	0.120333	0.102			900	15	0.151333	0.181667	0.232	0.1	0.0973333
930	15.5	0.185	0.197	0.243	0.115	0.131667	0.128667	0.171			930	15.5	0.172667	0.257	0.127333	0.112667	0.103667				930	15.5	0.221667	0.178	0.218667	0.119333	0.144333	0.138	0.101667			930	15.5	0.151333	0.184	0.237333	0.1	0.0973333
960	16	0.189	0.201	0.247667	0.115	0.133	0.137333	0.168333			960	16	0.174667	0.265333	0.131	0.114	0.103667				960	16	0.224667	0.18	0.220333	0.12	0.144	0.126333	0.103667			960	16	0.151	0.185667	0.241667	0.1	0.097
990	16.5	0.193333	0.205	0.252667	0.115	0.132333	0.13	0.168667			990	16.5	0.179667	0.273667	0.136	0.115667	0.103667				990	16.5	0.228667	0.181667	0.222667	0.121333	0.144333	0.148	0.102			990	16.5	0.151333	0.188333	0.245667	0.1	0.097
1020	17	0.198333	0.209667	0.257667	0.115667	0.130667	0.131333	0.170667			1020	17	0.184333	0.282333	0.141	0.117667	0.103667				1020	17	0.232667	0.184333	0.224667	0.119333	0.145	0.147667	0.105			1020	17	0.152	0.191	0.251333	0.1	0.097
1050	17.5	0.203333	0.212333	0.262667	0.114333	0.130333	0.128667	0.167667			1050	17.5	0.189	0.288667	0.150667	0.119667	0.103667				1050	17.5	0.235	0.185333	0.227	0.119333	0.144333	0.148333	0.105			1050	17.5	0.152	0.192667	0.254667	0.1	0.0963333
1080	18	0.207	0.215667	0.268	0.110333	0.131333	0.124667	0.169667			1080	18	0.191667	0.295333	0.161333	0.121333	0.103667				1080	18	0.238667	0.187333	0.229	0.119333	0.144667	0.148667	0.104333			1080	18	0.153	0.195	0.260333	0.1	0.096
1110	18.5	0.210667	0.218667	0.274	0.112667	0.131667	0.134	0.165			1110	18.5	0.196333	0.300333	0.173	0.123333	0.103333				1110	18.5	0.241333	0.188333	0.231333	0.117667	0.145	0.149	0.104333			1110	18.5	0.153333	0.196333	0.264667	0.1	0.096
1140	19	0.214667	0.221333	0.279667	0.111667	0.132	0.182333	0.171			1140	19	0.199333	0.305667	0.184667	0.125	0.103333				1140	19	0.244333	0.190667	0.233667	0.117	0.145	0.15	0.103333			1140	19	0.153667	0.198	0.269333	0.1	0.096
1170	19.5	0.219	0.224667	0.286	0.111667	0.131333	0.184333	0.168333			1170	19.5	0.203	0.309333	0.199	0.126333	0.103667				1170	19.5	0.247333	0.192333	0.236	0.116333	0.145333	0.149	0.103			1170	19.5	0.154667	0.199333	0.274	0.1	0.096
1200	20	0.223667	0.228333	0.292333	0.112	0.130667	0.181333	0.165667			1200	20	0.206667	0.315667	0.220667	0.128	0.103				1200	20	0.252667	0.194333	0.238667	0.118667	0.145	0.160667	0.108667			1200	20	0.156	0.202	0.280333	0.1	0.0956667
1230	20.5	0.227667	0.231333	0.298333	0.112	0.131333	0.182333	0.17			1230	20.5	0.209667	0.32	0.247	0.129333	0.103				1230	20.5	0.256667	0.195667	0.241	0.125667	0.145	0.16	0.105			1230	20.5	0.157667	0.204333	0.286	0.1	0.0956667
1260	21	0.232	0.233667	0.304333	0.112667	0.130667	0.181667	0.165667			1260	21	0.213333	0.324667	0.273333	0.13	0.103				1260	21	0.259667	0.196667	0.243333	0.125667	0.145	0.150667	0.104667			1260	21	0.16	0.205	0.29	0.1	0.095
1290	21.5	0.236	0.236667	0.310667	0.113	0.131	0.181	0.170667			1290	21.5	0.216667	0.33	0.297667	0.13	0.103				1290	21.5	0.263333	0.198667	0.246333	0.125667	0.145667	0.151	0.113333			1290	21.5	0.163667	0.207667	0.295	0.1	0.095
1320	22	0.239	0.237667	0.314667	0.112667	0.128667	0.182667	0.167			1320	22	0.218333	0.331	0.319333	0.130333	0.103				1320	22	0.263333	0.198667	0.248333	0.127667	0.145	0.150333	0.103			1320	22	0.164333	0.208333	0.298333	0.1	0.095
1350	22.5	0.24	0.237667	0.318333	0.113	0.129333	0.180667	0.168333			1350	22.5	0.217333	0.329333	0.333333	0.13	0.103				1350	22.5	0.262	0.198667	0.25	0.131	0.145333	0.150667	0.104333			1350	22.5	0.165	0.208	0.300667	0.0996667	0.095
1380	23	0.244667	0.241	0.322	0.113333	0.129667	0.200333	0.170667			1380	23	0.219667	0.336	0.343667	0.130333	0.103				1380	23	0.27	0.199333	0.251333	0.134	0.146	0.150667	0.102667			1380	23	0.166667	0.208667	0.302667	0.0993333	0.095
1410	23.5	0.250667	0.246	0.328	0.116	0.131333	0.201	0.170333			1410	23.5	0.225667	0.345667	0.357333	0.132	0.103667				1410	23.5	0.278667	0.202667	0.254	0.136333	0.146667	0.151333	0.0983333			1410	23.5	0.178333	0.211667	0.309667	0.0993333	0.0943333
1440	24	0.254667	0.249333	0.332667	0.118667	0.133333	0.198667	0.17			1440	24	0.229333	0.350333	0.367	0.133667	0.103667				1440	24	0.282	0.204667	0.256333	0.140667	0.146667	0.16	0.106333			1440	24	0.186667	0.213333	0.313333	0.0993333	0.0946667
1470	24.5	0.258	0.250667	0.3195	0.117667	0.134	0.200333	0.168333			1470	24.5	0.232333	0.352667	0.375333	0.134333	0.103333				1470	24.5	0.281333	0.205333	0.258333	0.145	0.146667	0.16	0.105667			1470	24.5	0.190667	0.213	0.315	0.0993333	0.094
1500	25	0.263333	0.255	0.326	0.116667	0.132333	0.2	0.169333			1500	25	0.235	0.359667	0.382667	0.134667	0.102667				1500	25	0.288333	0.208	0.260333	0.150667	0.146667	0.160333	0.104333			1500	25	0.198	0.215333	0.319333	0.0993333	0.094
1530	25.5	0.268	0.258	0.3315	0.116333	0.132	0.201667	0.168667			1530	25.5	0.236667	0.364	0.39	0.134	0.102667				1530	25.5	0.292	0.209333	0.263	0.157667	0.147	0.16	0.105667			1530	25.5	0.204667	0.217333	0.322667	0.0993333	0.094
1560	26	0.27	0.258667	0.334	0.116667	0.132667	0.198667	0.167			1560	26	0.237333	0.364	0.397	0.134	0.103				1560	26	0.292	0.210333	0.264333	0.165333	0.147	0.159333	0.105			1560	26	0.205333	0.218	0.325333	0.0996667	0.094
1590	26.5	0.274333	0.259333	0.334	0.116667	0.131	0.201667	0.167333			1590	26.5	0.240667	0.363333	0.399333	0.134333	0.102667				1590	26.5	0.287667	0.211333	0.266	0.172667	0.146667	0.159333	0.104			1590	26.5	0.197	0.218667	0.325333	0.0993333	0.094
1620	27	0.279667	0.261667	0.3385	0.117	0.130333	0.2	0.167667			1620	27	0.244	0.367	0.408	0.135	0.102667				1620	27	0.291	0.212333	0.268667	0.180667	0.147	0.160333	0.105667			1620	27	0.200333	0.220667	0.329333	0.0996667	0.094
1650	27.5	0.283	0.263333	0.341	0.117	0.130667	0.198667	0.164333			1650	27.5	0.246	0.368333	0.412	0.135333	0.102667				1650	27.5	0.290667	0.212667	0.27	0.189	0.147333	0.160333	0.121333			1650	27.5	0.201333	0.221667	0.331	0.0996667	0.094
1680	28	0.287333	0.265667	0.3435	0.116333	0.130333	0.199333	0.176667			1680	28	0.247	0.370667	0.415	0.135333	0.102667				1680	28	0.293	0.213	0.271667	0.198	0.147333	0.160667	0.108			1680	28	0.205	0.221667	0.332	0.0996667	0.094
1710	28.5	0.291	0.268	0.348	0.116667	0.130333	0.200667	0.195667			1710	28.5	0.248333	0.373333	0.419667	0.134667	0.102667				1710	28.5	0.296	0.214333	0.273	0.208	0.147	0.160667	0.106667			1710	28.5	0.209667	0.223667	0.335	0.101	0.0936667
1740	29	0.295667	0.271	0.3515	0.117	0.131333	0.202	0.167667			1740	29	0.25	0.378333	0.425	0.134667	0.102667				1740	29	0.3	0.215667	0.276	0.218	0.147	0.159333	0.114667			1740	29	0.217333	0.225667	0.339333	0.101	0.0933333
1770	29.5	0.298667	0.272333	0.353	0.117667	0.132	0.199	0.166333			1770	29.5	0.252	0.378333	0.429	0.135333	0.102667				1770	29.5	0.3	0.215667	0.277	0.228667	0.147	0.161	0.116			1770	29.5	0.219667	0.225667	0.339667	0.100667	0.093
1800	30	0.304	0.274667	0.356	0.117333	0.131	0.195	0.164667			1800	30	0.255	0.382	0.433667	0.136667	0.103				1800	30	0.303333	0.216	0.279	0.239333	0.147	0.160667	0.107667			1800	30	0.225	0.226667	0.340667	0.100667	0.093
1830	30.5	0.306333	0.276667	0.3585	0.117333	0.131	0.199333	0.225			1830	30.5	0.256333	0.383333	0.436	0.137	0.103				1830	30.5	0.305333	0.217333	0.280667	0.25	0.147	0.161	0.106667			1830	30.5	0.227667	0.227667	0.344	0.101	0.093
1860	31	0.309333	0.278667	0.3615	0.117667	0.131	0.202333	0.221667			1860	31	0.257667	0.384333	0.440333	0.137667	0.103				1860	31	0.306333	0.218	0.282	0.260667	0.147	0.16	0.115333			1860	31	0.229333	0.228	0.345	0.101667	0.093
1890	31.5	0.312	0.280667	0.3635	0.117667	0.13	0.201333	0.225			1890	31.5	0.260333	0.386333	0.441333	0.138667	0.103				1890	31.5	0.308	0.218	0.283333	0.269667	0.146667	0.160667	0.106			1890	31.5	0.232667	0.228667	0.346333	0.102333	0.093
1920	32	0.313333	0.282333	0.367	0.117667	0.13	0.199333	0.224333			1920	32	0.262	0.387333	0.443333	0.138333	0.102667				1920	32	0.308667	0.218667	0.284667	0.278	0.147	0.160667	0.118333			1920	32	0.234333	0.229333	0.347333	0.102333	0.0933333
1950	32.5	0.316667	0.285	0.3695	0.117667	0.129667	0.212333	0.224667			1950	32.5	0.264	0.39	0.446	0.138667	0.102667				1950	32.5	0.311	0.219667	0.286	0.284667	0.147	0.161333	0.115333			1950	32.5	0.237333	0.23	0.348667	0.102333	0.0933333
1980	33	0.320333	0.287333	0.3715	0.117667	0.129667	0.199667	0.237			1980	33	0.267	0.393	0.447667	0.139333	0.103				1980	33	0.313333	0.22	0.287333	0.29	0.147	0.161333	0.108667			1980	33	0.241	0.230667	0.349333	0.102	0.093
2010	33.5	0.321667	0.289333	0.373	0.117667	0.128	0.198667	0.242333			2010	33.5	0.268333	0.395	0.449667	0.139667	0.103				2010	33.5	0.315	0.221333	0.289	0.294	0.146667	0.161	0.106333			2010	33.5	0.243333	0.231667	0.351667	0.102333	0.093
2040	34	0.325	0.291667	0.3755	0.117667	0.128333	0.198333	0.228667			2040	34	0.271333	0.398	0.452	0.14	0.102333				2040	34	0.318333	0.222333	0.291	0.297333	0.146667	0.16	0.111333			2040	34	0.246	0.232667	0.353333	0.103	0.0926667
2070	34.5	0.328667	0.294	0.3775	0.118	0.129667	0.2	0.223667			2070	34.5	0.273333	0.401	0.454	0.141	0.102667				2070	34.5	0.323	0.223	0.292	0.300333	0.146667	0.161667	0.109			2070	34.5	0.249333	0.233	0.353667	0.103333	0.093
2100	35	0.330667	0.297	0.381	0.118333	0.129333	0.197333	0.223667			2100	35	0.275333	0.404	0.455	0.141	0.103				2100	35	0.326333	0.223333	0.293667	0.303	0.147	0.161333	0.111			2100	35	0.251333	0.234	0.355333	0.103333	0.092
2130	35.5	0.332333	0.299667	0.383	0.118333	0.129333	0.197	0.222			2130	35.5	0.277	0.406333	0.457333	0.141	0.102667				2130	35.5	0.328667	0.225	0.295333	0.305667	0.147	0.161	0.111333			2130	35.5	0.253	0.234667	0.357	0.103333	0.0926667
2160	36	0.335667	0.302333	0.386	0.118667	0.129667	0.198333	0.221667			2160	36	0.279	0.409	0.46	0.140667	0.103333				2160	36	0.332667	0.226	0.296667	0.307667	0.147	0.161	0.111667			2160	36	0.254333	0.236	0.358333	0.103333	0.0926667
2190	36.5	0.334333	0.303	0.388	0.118667	0.129	0.194	0.226333			2190	36.5	0.279667	0.408	0.458	0.141333	0.102667				2190	36.5	0.330667	0.226	0.298333	0.31	0.147	0.160667	0.111667			2190	36.5	0.253	0.236333	0.358	0.104	0.092
2220	37	0.335333	0.305333	0.39	0.118667	0.129667	0.196333	0.219667			2220	37	0.277333	0.409333	0.458667	0.141667	0.102667				2220	37	0.333	0.227	0.299333	0.312333	0.146333	0.160333	0.107667			2220	37	0.253333	0.237333	0.359667	0.105	0.092
2250	37.5	0.336333	0.307333	0.3915	0.118667	0.128333	0.196333	0.223667			2250	37.5	0.278	0.410333	0.458333	0.142667	0.102				2250	37.5	0.333667	0.228	0.300667	0.314333	0.146333	0.160667	0.112333			2250	37.5	0.254	0.237667	0.360667	0.105667	0.092
2280	38	0.339333	0.309667	0.3935	0.118667	0.129667	0.196	0.219			2280	38	0.281333	0.412667	0.461333	0.144	0.102333				2280	38	0.338667	0.228	0.302	0.317	0.146	0.161333	0.111			2280	38	0.256	0.238	0.360333	0.106	0.0923333
2310	38.5	0.341	0.311333	0.396	0.119	0.128667	0.194333	0.219667			2310	38.5	0.283333	0.414	0.463333	0.147	0.102				2310	38.5	0.341667	0.228667	0.303333	0.319	0.146667	0.161	0.126			2310	38.5	0.257333	0.238	0.361	0.107	0.0923333
2340	39	0.343	0.314667	0.3975	0.119	0.128667	0.198	0.218			2340	39	0.285	0.416	0.465667	0.146333	0.103				2340	39	0.344667	0.229667	0.304667	0.322	0.146667	0.161333	0.116333			2340	39	0.26	0.239	0.361667	0.107	0.0923333
2370	39.5	0.341667	0.315	0.3995	0.119667	0.129333	0.195	0.222333			2370	39.5	0.285333	0.415	0.465667	0.146	0.102333				2370	39.5	0.342333	0.229667	0.305667	0.324	0.146333	0.160333	0.117333			2370	39.5	0.259333	0.239	0.362333	0.107667	0.092
2400	40	0.346667	0.319	0.4045	0.12	0.129	0.195	0.238667			2400	40	0.29	0.420667	0.469333	0.144	0.102				2400	40	0.349667	0.231333	0.307333	0.328333	0.146333	0.162	0.111333			2400	40	0.263333	0.241	0.365	0.108333	0.0923333
2430	40.5	0.344333	0.319667	0.4065	0.12	0.129667	0.195333	0.241			2430	40.5	0.291333	0.420333	0.471	0.143667	0.102333				2430	40.5	0.347667	0.232333	0.309	0.330333	0.146333	0.161	0.112			2430	40.5	0.262667	0.241667	0.366333	0.109	0.092
2460	41	0.347667	0.323	0.4075	0.120333	0.13	0.194333	0.241333			2460	41	0.293667	0.424333	0.474	0.142667	0.102667				2460	41	0.353667	0.232667	0.31	0.333	0.146333	0.161667	0.111333			2460	41	0.266333	0.242	0.366333	0.109667	0.0916667
2490	41.5	0.346667	0.323667	0.4105	0.121	0.13	0.194333	0.239333			2490	41.5	0.295667	0.423667	0.472333	0.142	0.102				2490	41.5	0.352	0.233333	0.311333	0.335667	0.146	0.161333	0.144333			2490	41.5	0.265667	0.242333	0.367	0.110333	0.092
2520	42	0.346333	0.325	0.413	0.121	0.129333	0.193	0.238			2520	42	0.297333	0.424667	0.471667	0.142	0.103				2520	42	0.352	0.234	0.311667	0.337667	0.146	0.160667	0.111			2520	42	0.266	0.243	0.368667	0.110333	0.0916667
2550	42.5	0.346667	0.325333	0.412	0.121667	0.129	0.192667	0.239667			2550	42.5	0.299333	0.423667	0.471	0.141667	0.101667				2550	42.5	0.352	0.233333	0.312333	0.339	0.146	0.162667	0.111			2550	42.5	0.266333	0.242333	0.367667	0.111333	0.0916667
2580	43	0.347667	0.328	0.415	0.122	0.128667	0.194333	0.235667			2580	43	0.301	0.426667	0.473333	0.142333	0.103				2580	43	0.354	0.234333	0.313333	0.342	0.146	0.16	0.116667			2580	43	0.268333	0.243333	0.368	0.112	0.0916667
2610	43.5	0.349667	0.33	0.4175	0.122333	0.129667	0.195333	0.236333			2610	43.5	0.304	0.43	0.475	0.143	0.102333				2610	43.5	0.357	0.235333	0.314667	0.344	0.145667	0.161333	0.143			2610	43.5	0.269667	0.244333	0.369667	0.113	0.0913333
2640	44	0.348667	0.329667	0.418	0.123	0.129667	0.193333	0.235			2640	44	0.304333	0.428333	0.472667	0.143333	0.102333				2640	44	0.355333	0.234667	0.315333	0.345333	0.146	0.161667	0.113			2640	44	0.269	0.243333	0.369	0.114333	0.0913333
2670	44.5	0.349333	0.332	0.4195	0.123333	0.128667	0.194667	0.235667			2670	44.5	0.305667	0.430667	0.474	0.141	0.102667				2670	44.5	0.356333	0.235667	0.316667	0.347333	0.145667	0.162	0.114			2670	44.5	0.269333	0.244667	0.371	0.116	0.092
2700	45	0.349	0.331667	0.4195	0.123333	0.129333	0.193667	0.232667			2700	45	0.307	0.429333	0.472667	0.137667	0.103333				2700	45	0.356	0.235667	0.316667	0.348667	0.145333	0.169333	0.191			2700	45	0.268667	0.244	0.37	0.117333	0.0916667
2730	45.5	0.342	0.333	0.421	0.123333	0.127667	0.192333	0.235			2730	45.5	0.305	0.430333	0.472	0.137333	0.104				2730	45.5	0.346667	0.236	0.317333	0.348333	0.146	0.162333	0.109333			2730	45.5	0.264333	0.244333	0.369667	0.119333	0.0913333
2760	46	0.347667	0.339333	0.429	0.123667	0.125667	0.193	0.232			2760	46	0.310667	0.440333	0.483333	0.135667	0.103667				2760	46	0.354	0.24	0.319333	0.354	0.145667	0.162	0.108333			2760	46	0.268667	0.249667	0.375667	0.121333	0.0913333
2790	46.5	0.351667	0.345333	0.4365	0.124	0.124667	0.194	0.223667			2790	46.5	0.313667	0.448	0.492	0.137333	0.103333				2790	46.5	0.358667	0.245	0.322	0.359333	0.145333	0.162667	0.109667			2790	46.5	0.271	0.253667	0.381667	0.121333	0.0913333
2820	47	0.352	0.347333	0.4395	0.124333	0.122333	0.193	0.225333			2820	47	0.315667	0.451	0.496333	0.137667	0.103333				2820	47	0.36	0.246667	0.323333	0.361	0.145667	0.162667	0.111333			2820	47	0.270667	0.255333	0.383667	0.123667	0.0933333
2850	47.5	0.352	0.347	0.4405	0.125	0.126	0.192	0.239333			2850	47.5	0.317	0.449667	0.495	0.138	0.103667				2850	47.5	0.359667	0.245667	0.323667	0.362333	0.145667	0.162667	0.115			2850	47.5	0.27	0.253667	0.380333	0.126333	0.0936667
2880	48	0.351333	0.349	0.444	0.125	0.124667	0.194	0.235333			2880	48	0.318	0.452667	0.497	0.136667	0.103333				2880	48	0.358	0.247667	0.325	0.366	0.145667	0.163	0.109667			2880	48	0.269	0.255667	0.382	0.130333	0.094
2910	48.5	0.354333	0.352333	0.448	0.125667	0.128	0.193	0.233667			2910	48.5	0.320667	0.456667	0.502	0.134333	0.103				2910	48.5	0.361667	0.249667	0.326333	0.369333	0.145667	0.163333	0.110667			2910	48.5	0.270333	0.257667	0.384333	0.132667	0.094
2940	49	0.353333	0.353667	0.4495	0.126333	0.125	0.193	0.238667			2940	49	0.321	0.456667	0.502	0.134667	0.103333				2940	49	0.359667	0.250333	0.327	0.372333	0.145667	0.162667	0.111667			2940	49	0.268667	0.258667	0.384333	0.136	0.0936667
2970	49.5	0.355	0.356333	0.452	0.127	0.122667	0.192	0.229333			2970	49.5	0.323	0.460333	0.506	0.134	0.103667				2970	49.5	0.361333	0.252333	0.328333	0.375333	0.145667	0.162667	0.109			2970	49.5	0.268333	0.259667	0.386667	0.140333	0.0943333
3000	50	0.355	0.358	0.453	0.127333	0.126	0.193667	0.236667			3000	50	0.324667	0.460333	0.506667	0.135333	0.103333				3000	50	0.362333	0.253	0.328667	0.378333	0.145667	0.163	0.109667			3000	50	0.268333	0.259667	0.386	0.144667	0.0936667
3030	50.5	0.355333	0.358667	0.454	0.127333	0.126	0.193	0.235667			3030	50.5	0.325333	0.461	0.505	0.134667	0.102667				3030	50.5	0.362	0.252667	0.329667	0.380333	0.145667	0.162667	0.113667			3030	50.5	0.267333	0.259	0.385	0.148667	0.0933333
3060	51	0.356	0.361	0.457	0.127667	0.123667	0.191667	0.232333			3060	51	0.328	0.463667	0.506333	0.133	0.102				3060	51	0.363667	0.254333	0.331	0.384333	0.145667	0.162	0.113333			3060	51	0.266333	0.261	0.386	0.152	0.093
3090	51.5	0.354333	0.361667	0.4595	0.127667	0.124	0.193	0.239			3090	51.5	0.328	0.464667	0.505	0.132333	0.102333				3090	51.5	0.361667	0.255667	0.332	0.387	0.145333	0.162333	0.113667			3090	51.5	0.265333	0.262	0.386333	0.155667	0.093
3120	52	0.347	0.359333	0.4595	0.130667	0.123667	0.193	0.236667			3120	52	0.323667	0.457667	0.499333	0.131	0.102667				3120	52	0.352	0.254667	0.332	0.388	0.145333	0.163	0.111667			3120	52	0.260667	0.260667	0.385333	0.158667	0.093
3150	52.5	0.347	0.353667	0.4505	0.131667	0.124667	0.193333	0.238			3150	52.5	0.326333	0.451667	0.490667	0.130667	0.103				3150	52.5	0.353333	0.248333	0.330333	0.383	0.145667	0.162	0.121333			3150	52.5	0.262	0.253333	0.375	0.160667	0.093
3180	53	0.352667	0.355333	0.451	0.133	0.124667	0.191667	0.233333			3180	53	0.331333	0.454667	0.493333	0.13	0.102667				3180	53	0.359667	0.248667	0.330667	0.386	0.145333	0.162667	0.111667			3180	53	0.264333	0.254	0.374667	0.163	0.093
3210	53.5	0.351333	0.356	0.4525	0.133667	0.124333	0.191333	0.234667			3210	53.5	0.331333	0.455	0.492667	0.129667	0.102667				3210	53.5	0.357	0.249667	0.331333	0.388333	0.145667	0.163333	0.113667			3210	53.5	0.262667	0.255333	0.376	0.166667	0.093
3240	54	0.354667	0.358333	0.4525	0.133667	0.124667	0.193	0.234			3240	54	0.335333	0.457667	0.491	0.128667	0.103667				3240	54	0.36	0.249	0.331333	0.391333	0.145333	0.162333	0.114333			3240	54	0.264	0.254333	0.375333	0.171	0.093
3270	54.5	0.351333	0.357	0.451	0.134333	0.125	0.191333	0.238			3270	54.5	0.333	0.455	0.489333	0.128667	0.103				3270	54.5	0.355	0.249333	0.331667	0.391333	0.145333	0.162	0.113667			3270	54.5	0.261667	0.254333	0.375333	0.175333	0.093
3300	55	0.352333	0.358	0.4515	0.134667	0.125333	0.191	0.239667			3300	55	0.335333	0.456333	0.492667	0.128333	0.103				3300	55	0.355667	0.248667	0.331667	0.393333	0.145333	0.162667	0.124333			3300	55	0.262	0.254333	0.373667	0.179667	0.0926667
3330	55.5	0.352333	0.359667	0.453	0.134667	0.125333	0.19	0.237			3330	55.5	0.336333	0.457667	0.493667	0.128	0.103				3330	55.5	0.355667	0.249667	0.332333	0.394667	0.145333	0.162333	0.114			3330	55.5	0.262	0.255	0.375	0.184333	0.093
3360	56	0.355	0.361333	0.4545	0.135	0.125333	0.191	0.234667			3360	56	0.339	0.461	0.494333	0.127667	0.103333				3360	56	0.358333	0.250333	0.333	0.398	0.145333	0.163333	0.115			3360	56	0.263	0.255333	0.375	0.188333	0.093
3390	56.5	0.355	0.363	0.456	0.135	0.125333	0.191	0.234667			3390	56.5	0.34	0.462333	0.494667	0.128	0.103				3390	56.5	0.357667	0.25	0.332667	0.399667	0.145333	0.163	0.113667			3390	56.5	0.262667	0.255667	0.374667	0.192333	0.0923333
3420	57	0.355333	0.364	0.4585	0.135	0.125333	0.190667	0.235667			3420	57	0.340667	0.465	0.498667	0.126	0.103333				3420	57	0.357	0.252	0.333667	0.403	0.145	0.162667	0.109333			3420	57	0.261667	0.257667	0.377333	0.196667	0.0923333
3450	57.5	0.359667	0.368333	0.4615	0.133667	0.125333	0.192	0.235667			3450	57.5	0.344667	0.471	0.503667	0.124667	0.103				3450	57.5	0.361	0.253667	0.334667	0.407333	0.145333	0.162667	0.137333			3450	57.5	0.263	0.259	0.379667	0.201	0.0923333
3480	58	0.36	0.369667	0.465	0.134	0.125333	0.193333	0.238667			3480	58	0.345	0.472667	0.507	0.123667	0.103				3480	58	0.360667	0.253667	0.335667	0.409	0.145	0.162	0.116			3480	58	0.262	0.259	0.379	0.206	0.0923333
3510	58.5	0.361667	0.371667	0.4675	0.134333	0.125333	0.19	0.235667			3510	58.5	0.347	0.476	0.508667	0.122333	0.104				3510	58.5	0.361667	0.255	0.336667	0.413	0.144667	0.162667	0.110667			3510	58.5	0.261	0.26	0.380333	0.210667	0.0923333
3540	59	0.36	0.371333	0.4675	0.134333	0.125667	0.191	0.238667			3540	59	0.345667	0.475	0.507333	0.122	0.104667				3540	59	0.358	0.255667	0.337333	0.414333	0.145	0.162667	0.134			3540	59	0.259333	0.260667	0.380333	0.215333	0.0923333
3570	59.5	0.359333	0.371	0.468	0.134	0.125667	0.191333	0.235667			3570	59.5	0.345667	0.475667	0.506667	0.122	0.104667				3570	59.5	0.357333	0.255333	0.337667	0.416667	0.144667	0.161667	0.125667			3570	59.5	0.259	0.260333	0.379667	0.219333	0.0923333
3600	60	0.360333	0.373333	0.4695	0.136	0.126	0.192	0.24			3600	60	0.347	0.479	0.508	0.121667	0.105				3600	60	0.358667	0.256333	0.339	0.420333	0.144667	0.163333	0.115667			3600	60	0.259	0.261667	0.381667	0.223	0.0923333
3630	60.5	0.357	0.371333	0.4705	0.137	0.126	0.191667	0.239667			3630	60.5	0.343667	0.475667	0.507	0.121	0.105667				3630	60.5	0.353667	0.256333	0.339333	0.420333	0.144667	0.162	0.129333			3630	60.5	0.257	0.261333	0.381	0.225667	0.0923333
3660	61	0.359333	0.373333	0.473	0.136667	0.126	0.191	0.234333			3660	61	0.346667	0.479333	0.509333	0.120333	0.106333				3660	61	0.355667	0.256333	0.339667	0.422667	0.144667	0.162667	0.122			3660	61	0.257667	0.261	0.38	0.229	0.092
3690	61.5	0.36	0.374667	0.4755	0.138	0.126	0.192667	0.237333			3690	61.5	0.347333	0.483	0.511333	0.118667	0.106333				3690	61.5	0.356667	0.257333	0.340333	0.426333	0.144667	0.162333	0.115667			3690	61.5	0.257667	0.262667	0.380667	0.232333	0.092
3720	62	0.357333	0.374	0.4765	0.138	0.126	0.192667	0.235667			3720	62	0.345	0.481333	0.511667	0.115667	0.106333				3720	62	0.353333	0.257667	0.341	0.427333	0.144667	0.162667	0.117			3720	62	0.256333	0.262667	0.380667	0.235	0.092
3750	62.5	0.359	0.375667	0.4785	0.138	0.126	0.192667	0.235			3750	62.5	0.346333	0.484	0.514	0.116	0.104333				3750	62.5	0.355	0.258667	0.342333	0.429667	0.144333	0.162667	0.140667			3750	62.5	0.256333	0.263667	0.382333	0.238	0.092
3780	63	0.359667	0.377	0.4795	0.138	0.126	0.19	0.235			3780	63	0.346333	0.487667	0.514333	0.115667	0.105				3780	63	0.355333	0.258333	0.342667	0.432333	0.144333	0.163	0.111333			3780	63	0.256333	0.263	0.382	0.24	0.092
3810	63.5	0.361	0.379333	0.4835	0.138667	0.126	0.190333	0.235			3810	63.5	0.347333	0.493333	0.519	0.115667	0.104333				3810	63.5	0.356	0.261	0.344667	0.436333	0.144333	0.162	0.116667			3810	63.5	0.256	0.266333	0.385333	0.243667	0.092
3840	64	0.362333	0.381333	0.4845	0.139667	0.126	0.191	0.234333			3840	64	0.347667	0.496333	0.521333	0.116	0.104				3840	64	0.358	0.261	0.344667	0.438333	0.144	0.162	0.118			3840	64	0.256	0.265667	0.385	0.246333	0.0916667
3870	64.5	0.36	0.380333	0.486	0.14	0.126	0.193	0.236			3870	64.5	0.345	0.495	0.521	0.114	0.103667				3870	64.5	0.354667	0.261333	0.345	0.439667	0.143667	0.164	0.122333			3870	64.5	0.254333	0.266	0.384333	0.249	0.092
3900	65	0.359	0.38	0.486	0.140667	0.126	0.192	0.234667			3900	65	0.342	0.493667	0.523333	0.112	0.104333				3900	65	0.353333	0.261333	0.345333	0.441333	0.144	0.161667	0.117667			3900	65	0.254333	0.266	0.385	0.251667	0.092
3930	65.5	0.356	0.378667	0.4875	0.139667	0.126	0.189667	0.233333			3930	65.5	0.34	0.491667	0.521667	0.111667	0.104				3930	65.5	0.35	0.262	0.346	0.441667	0.144	0.161667	0.118333			3930	65.5	0.253	0.266333	0.386	0.254333	0.0916667
3960	66	0.358	0.381667	0.4895	0.14	0.126	0.192667	0.234333			3960	66	0.342	0.496333	0.527333	0.111667	0.104667				3960	66	0.353	0.263333	0.346667	0.445	0.143667	0.162667	0.164333			3960	66	0.254667	0.268	0.387333	0.257	0.0916667
3990	66.5	0.355333	0.379667	0.49	0.141	0.126	0.19	0.239			3990	66.5	0.34	0.494333	0.526	0.110333	0.104667				3990	66.5	0.35	0.263	0.346667	0.445	0.144	0.162	0.115			3990	66.5	0.253667	0.267667	0.388	0.259667	0.092
4020	67	0.355333	0.380667	0.49	0.141667	0.126	0.191333	0.239333			4020	67	0.341	0.494667	0.527	0.109667	0.104667				4020	67	0.350667	0.262333	0.346333	0.446	0.143667	0.164	0.118667			4020	67	0.254667	0.266667	0.386	0.262667	0.0916667
4050	67.5	0.354667	0.380333	0.491	0.140333	0.126	0.191333	0.238333			4050	67.5	0.3405	0.496	0.526333	0.109667	0.105667				4050	67.5	0.35	0.261	0.345667	0.445333	0.143667	0.162667	0.144667			4050	67.5	0.255	0.265667	0.384333	0.265333	0.0913333
4080	68	0.353667	0.380667	0.494	0.139333	0.126	0.193	0.236667			4080	68	0.34	0.497	0.526667	0.108667	0.105667				4080	68	0.349333	0.262333	0.346667	0.447333	0.143667	0.162667	0.131667			4080	68	0.255	0.267667	0.385333	0.268333	0.0913333
4110	68.5	0.356	0.384667	0.4975	0.141667	0.126	0.189667	0.236667			4110	68.5	0.3435	0.503667	0.532667	0.108	0.106333				4110	68.5	0.353	0.264667	0.348	0.451667	0.143667	0.163	0.116667			4110	68.5	0.256333	0.269333	0.388	0.271333	0.0916667
4140	69	0.353333	0.382667	0.4965	0.142	0.126	0.191667	0.238667			4140	69	0.3415	0.498667	0.531	0.107667	0.106667				4140	69	0.35	0.264667	0.348	0.451667	0.143667	0.163	0.131333			4140	69	0.256	0.269333	0.388333	0.274	0.0913333
4170	69.5	0.351667	0.383	0.4995	0.143	0.126	0.191	0.234333			4170	69.5	0.341	0.499	0.535333	0.107667	0.106667				4170	69.5	0.349	0.265667	0.349333	0.453333	0.143667	0.162667	0.123333			4170	69.5	0.256	0.271	0.389333	0.277333	0.0916667
4200	70	0.351667	0.383667	0.4995	0.143333	0.126	0.191333	0.235667			4200	70	0.3415	0.499	0.533	0.107667	0.107				4200	70	0.35	0.264667	0.348333	0.453667	0.143333	0.164667	0.119333			4200	70	0.257333	0.269333	0.386667	0.28	0.092
4230	70.5	0.351333	0.384	0.5015	0.142667	0.126333	0.191	0.239			4230	70.5	0.3415	0.499667	0.534667	0.107333	0.107				4230	70.5	0.35	0.266	0.349	0.456	0.143333	0.163667	0.139			4230	70.5	0.257667	0.271333	0.388	0.283333	0.0916667
4260	71	0.350333	0.384667	0.5025	0.142	0.126	0.19	0.232333			4260	71	0.3415	0.500333	0.533333	0.107	0.106333				4260	71	0.350333	0.265	0.348333	0.456667	0.143333	0.163333	0.159			4260	71	0.258333	0.270667	0.386	0.285667	0.0916667
4290	71.5	0.349333	0.384667	0.503	0.143667	0.126	0.191	0.243			4290	71.5	0.341	0.500667	0.533	0.107	0.106333				4290	71.5	0.35	0.264667	0.348333	0.456667	0.143333	0.164	0.133333			4290	71.5	0.259	0.269667	0.384333	0.288333	0.0913333
4320	72	0.349	0.386	0.5055	0.144333	0.126	0.191	0.239333			4320	72	0.342	0.502333	0.536333	0.106333	0.106667				4320	72	0.351	0.267	0.349333	0.459	0.143	0.163667	0.118			4320	72	0.26	0.272333	0.387	0.291	0.0916667

## Sheet: raw data (plate reader)
Generated by Gen5 3.05
Software Version	3.05.11
Experiment File Path:	C:\Users\Owner\Desktop\GEN5\Experiments\Shifra\30.7.19\30.7.19 72h exp.xpt
Protocol File Path:	C:\Users\Owner\Desktop\GEN5\Protocols\Shifra Growth curve 48h.prt
Plate Number	Plate 1
Date	2019-07-30
Time	14:52:08
Reader Type:	Synergy H1
Reader Serial Number:	19022012
Reading Type	Reader
Procedure Details
Plate Type	96 WELL PLATE (Use plate lid)
Set Temperature	Setpoint 30°C
	Preheat before moving to next step
Start Kinetic	Runtime 72:00:00 (HH:MM:SS), Interval 0:30:00, 145 Reads
Shake	Double Orbital: Continuous
	Frequency: 282 cpm (3 mm)
Read	Absorbance Endpoint
	Full Plate
	Wavelengths: 600
	Read Speed: Normal, Delay: 100 msec, Measurements/Data Point: 8
End Kinetic
600
	Time	T° 600	A1	A2	A3	A4	A5	A6	A7	A8	A9	A10	A11	A12	B1	B2	B3	B4	B5	B6	B7	B8	B9	B10	B11	B12	C1	C2	C3	C4	C5	C6	C7	C8	C9	C10	C11	C12	D1	D2	D3	D4	D5	D6	D7	D8	D9	D10	D11
	00:29:10	30	0.093	0.097	0.1	0.109	0.111	0.109	0.209	0.094	0.097	0.105	0.109	0.108	0.104	0.092	0.107	0.109	0.104	0.108	0.187	0.088	0.095	0.104	0.106	0.106	0.094	0.094	0.102	0.108	0.105	0.114	0.176	0.09	0.097	0.108	0.108	0.105	0.096	0.095	0.115	0.126	0.12	0.099	0.089	0.09	0.095	0.107	0.116
	00:59:10	30.1	0.092	0.097	0.097	0.11	0.108	0.118	0.207	0.096	0.098	0.103	0.11	0.108	0.105	0.092	0.106	0.11	0.102	0.11	0.184	0.09	0.096	0.103	0.108	0.108	0.093	0.094	0.099	0.112	0.104	0.123	0.176	0.091	0.097	0.107	0.106	0.105	0.095	0.094	0.121	0.133	0.121	0.104	0.091	0.092	0.094	0.106	0.117
	01:29:10	30.2	0.091	0.096	0.098	0.109	0.106	0.119	0.206	0.096	0.1	0.104	0.11	0.11	0.104	0.091	0.106	0.11	0.102	0.118	0.187	0.091	0.095	0.102	0.106	0.108	0.093	0.093	0.098	0.113	0.115	0.124	0.174	0.092	0.096	0.106	0.107	0.105	0.097	0.091	0.122	0.138	0.109	0.103	0.093	0.093	0.094	0.108	0.119
	01:59:10	30.2	0.093	0.097	0.095	0.112	0.105	0.117	0.204	0.097	0.101	0.102	0.112	0.11	0.101	0.092	0.109	0.11	0.102	0.121	0.189	0.093	0.099	0.101	0.107	0.113	0.094	0.093	0.099	0.114	0.124	0.125	0.174	0.093	0.097	0.106	0.108	0.106	0.098	0.096	0.124	0.135	0.117	0.109	0.093	0.095	0.094	0.111	0.14
	02:29:10	30.2	0.096	0.1	0.096	0.113	0.118	0.115	0.202	0.099	0.1	0.102	0.112	0.11	0.097	0.093	0.11	0.11	0.102	0.123	0.186	0.095	0.097	0.101	0.109	0.109	0.095	0.096	0.101	0.115	0.123	0.128	0.172	0.095	0.096	0.105	0.109	0.106	0.101	0.098	0.128	0.132	0.108	0.106	0.093	0.095	0.097	0.11	0.144
	02:59:10	30.2	0.1	0.104	0.098	0.113	0.12	0.121	0.195	0.101	0.101	0.102	0.111	0.109	0.101	0.094	0.109	0.11	0.112	0.124	0.175	0.096	0.098	0.1	0.109	0.11	0.098	0.1	0.1	0.115	0.127	0.129	0.167	0.097	0.098	0.105	0.108	0.105	0.102	0.099	0.127	0.131	0.12	0.107	0.096	0.094	0.096	0.11	0.135
	03:29:10	30.2	0.105	0.111	0.099	0.117	0.118	0.132	0.191	0.105	0.103	0.102	0.111	0.109	0.106	0.098	0.108	0.11	0.114	0.128	0.174	0.098	0.1	0.101	0.108	0.112	0.103	0.105	0.102	0.116	0.132	0.129	0.159	0.098	0.099	0.104	0.109	0.105	0.105	0.1	0.129	0.123	0.121	0.107	0.094	0.099	0.101	0.114	0.128
	03:59:10	30.2	0.111	0.116	0.1	0.116	0.122	0.134	0.193	0.107	0.106	0.101	0.111	0.108	0.114	0.107	0.108	0.114	0.113	0.125	0.166	0.101	0.102	0.1	0.107	0.114	0.11	0.11	0.103	0.114	0.129	0.129	0.155	0.101	0.102	0.104	0.109	0.104	0.111	0.106	0.129	0.112	0.127	0.111	0.101	0.103	0.106	0.111	0.127
	04:29:10	30.2	0.118	0.125	0.101	0.114	0.118	0.129	0.189	0.112	0.109	0.101	0.11	0.108	0.12	0.12	0.109	0.116	0.113	0.124	0.175	0.106	0.105	0.1	0.107	0.106	0.117	0.128	0.103	0.114	0.116	0.13	0.154	0.107	0.106	0.104	0.107	0.103	0.153	0.125	0.128	0.12	0.13	0.112	0.097	0.109	0.109	0.111	0.125
	04:59:10	30.2	0.128	0.136	0.1	0.113	0.118	0.122	0.187	0.122	0.114	0.102	0.111	0.107	0.131	0.131	0.106	0.114	0.114	0.122	0.178	0.119	0.111	0.1	0.108	0.114	0.128	0.133	0.104	0.119	0.129	0.133	0.153	0.119	0.112	0.104	0.107	0.103	0.198	0.147	0.124	0.123	0.132	0.11	0.098	0.131	0.111	0.111	0.123
	05:29:10	30.2	0.135	0.145	0.104	0.117	0.124	0.127	0.182	0.133	0.125	0.103	0.111	0.107	0.142	0.141	0.107	0.118	0.115	0.122	0.182	0.13	0.121	0.1	0.109	0.114	0.143	0.14	0.107	0.119	0.131	0.128	0.152	0.13	0.123	0.104	0.109	0.103	0.195	0.146	0.124	0.122	0.13	0.112	0.1	0.147	0.117	0.12	0.122
	05:59:10	30.2	0.145	0.15	0.105	0.117	0.121	0.128	0.185	0.141	0.129	0.103	0.112	0.107	0.149	0.142	0.107	0.118	0.115	0.123	0.179	0.136	0.13	0.101	0.109	0.112	0.149	0.144	0.105	0.118	0.132	0.128	0.15	0.137	0.128	0.105	0.11	0.103	0.185	0.147	0.129	0.122	0.131	0.117	0.097	0.147	0.128	0.125	0.12
	06:29:10	30.2	0.147	0.15	0.105	0.117	0.131	0.126	0.186	0.144	0.141	0.104	0.113	0.107	0.15	0.143	0.11	0.118	0.116	0.133	0.179	0.14	0.14	0.1	0.11	0.109	0.151	0.147	0.11	0.119	0.131	0.13	0.15	0.141	0.139	0.106	0.111	0.105	0.178	0.148	0.137	0.12	0.13	0.113	0.101	0.147	0.14	0.127	0.118
	06:59:10	30.1	0.148	0.152	0.107	0.117	0.131	0.123	0.181	0.145	0.159	0.104	0.112	0.106	0.15	0.145	0.111	0.118	0.116	0.132	0.179	0.141	0.155	0.102	0.111	0.113	0.151	0.149	0.108	0.118	0.133	0.131	0.151	0.142	0.154	0.106	0.112	0.102	0.176	0.148	0.144	0.119	0.13	0.14	0.099	0.147	0.144	0.128	0.117
	07:29:10	30.2	0.148	0.152	0.111	0.117	0.131	0.123	0.184	0.147	0.166	0.104	0.112	0.106	0.151	0.146	0.112	0.118	0.118	0.132	0.166	0.142	0.161	0.101	0.11	0.112	0.152	0.149	0.115	0.119	0.133	0.137	0.146	0.143	0.162	0.107	0.11	0.107	0.175	0.149	0.155	0.119	0.129	0.126	0.098	0.148	0.146	0.128	0.117
	07:59:10	30.2	0.148	0.153	0.113	0.115	0.13	0.13	0.19	0.148	0.171	0.104	0.111	0.105	0.151	0.148	0.112	0.118	0.117	0.131	0.162	0.143	0.166	0.102	0.108	0.111	0.151	0.15	0.114	0.119	0.134	0.132	0.151	0.144	0.166	0.106	0.11	0.105	0.174	0.149	0.164	0.118	0.13	0.116	0.1	0.147	0.148	0.129	0.115
	08:29:10	30.2	0.148	0.155	0.116	0.115	0.129	0.124	0.188	0.15	0.176	0.105	0.11	0.105	0.151	0.149	0.117	0.118	0.116	0.131	0.176	0.143	0.169	0.103	0.108	0.107	0.152	0.152	0.12	0.118	0.136	0.134	0.146	0.145	0.171	0.108	0.11	0.101	0.176	0.15	0.174	0.119	0.13	0.137	0.101	0.148	0.15	0.131	0.115
	08:59:10	30.1	0.149	0.157	0.121	0.114	0.134	0.122	0.189	0.152	0.18	0.106	0.111	0.104	0.151	0.151	0.125	0.117	0.116	0.13	0.176	0.144	0.172	0.104	0.108	0.107	0.152	0.153	0.126	0.118	0.136	0.139	0.147	0.145	0.176	0.108	0.11	0.101	0.178	0.151	0.182	0.119	0.129	0.116	0.099	0.148	0.151	0.131	0.114
	09:29:10	30.1	0.15	0.159	0.126	0.117	0.137	0.123	0.186	0.154	0.185	0.105	0.111	0.104	0.151	0.153	0.13	0.117	0.117	0.13	0.173	0.145	0.175	0.104	0.104	0.104	0.153	0.155	0.127	0.118	0.137	0.139	0.15	0.146	0.181	0.109	0.111	0.105	0.18	0.152	0.198	0.117	0.13	0.115	0.102	0.149	0.152	0.139	0.113
	09:59:10	30.1	0.15	0.161	0.132	0.113	0.133	0.121	0.184	0.157	0.189	0.106	0.107	0.103	0.151	0.156	0.136	0.116	0.118	0.129	0.161	0.145	0.179	0.106	0.103	0.102	0.154	0.158	0.132	0.117	0.137	0.137	0.141	0.146	0.187	0.11	0.109	0.107	0.183	0.153	0.201	0.118	0.129	0.135	0.101	0.149	0.153	0.144	0.113
	10:29:10	30.1	0.152	0.164	0.139	0.11	0.136	0.121	0.189	0.162	0.194	0.108	0.108	0.102	0.151	0.158	0.142	0.116	0.119	0.129	0.174	0.145	0.182	0.106	0.103	0.101	0.155	0.16	0.139	0.116	0.138	0.135	0.151	0.147	0.193	0.111	0.11	0.107	0.185	0.154	0.201	0.117	0.128	0.118	0.111	0.148	0.154	0.152	0.113
	10:59:10	30.1	0.154	0.167	0.149	0.111	0.134	0.122	0.185	0.165	0.199	0.11	0.111	0.103	0.152	0.161	0.152	0.115	0.119	0.128	0.172	0.146	0.185	0.108	0.103	0.103	0.156	0.163	0.148	0.116	0.137	0.136	0.151	0.147	0.2	0.113	0.107	0.107	0.188	0.157	0.202	0.116	0.129	0.118	0.102	0.148	0.156	0.161	0.112
	11:29:10	30.1	0.158	0.171	0.169	0.11	0.136	0.123	0.185	0.17	0.205	0.111	0.111	0.102	0.153	0.165	0.175	0.115	0.12	0.13	0.173	0.147	0.189	0.11	0.103	0.105	0.159	0.166	0.176	0.116	0.137	0.157	0.144	0.148	0.208	0.114	0.107	0.107	0.192	0.159	0.202	0.117	0.13	0.116	0.102	0.148	0.158	0.171	0.112
	11:59:10	30.2	0.162	0.174	0.194	0.115	0.136	0.12	0.186	0.173	0.212	0.112	0.111	0.102	0.154	0.168	0.204	0.115	0.119	0.13	0.171	0.148	0.195	0.11	0.103	0.105	0.162	0.169	0.206	0.116	0.136	0.137	0.144	0.149	0.215	0.116	0.108	0.106	0.196	0.161	0.202	0.116	0.13	0.138	0.102	0.148	0.161	0.18	0.112
	12:29:10	30.1	0.168	0.178	0.21	0.107	0.137	0.121	0.191	0.178	0.218	0.115	0.112	0.102	0.156	0.171	0.218	0.114	0.121	0.13	0.163	0.15	0.199	0.112	0.104	0.105	0.165	0.173	0.217	0.116	0.135	0.14	0.141	0.15	0.222	0.117	0.108	0.106	0.199	0.163	0.202	0.117	0.13	0.118	0.102	0.148	0.163	0.191	0.111
	12:59:10	30.1	0.173	0.182	0.219	0.109	0.137	0.124	0.191	0.181	0.226	0.113	0.113	0.102	0.158	0.174	0.223	0.111	0.12	0.128	0.172	0.152	0.204	0.113	0.104	0.105	0.168	0.177	0.221	0.115	0.136	0.14	0.138	0.151	0.229	0.119	0.108	0.106	0.202	0.165	0.203	0.116	0.131	0.119	0.103	0.148	0.167	0.204	0.111
	13:29:10	30.1	0.178	0.186	0.227	0.109	0.137	0.126	0.189	0.184	0.236	0.118	0.114	0.102	0.16	0.177	0.227	0.115	0.119	0.137	0.175	0.153	0.209	0.115	0.105	0.105	0.171	0.18	0.225	0.115	0.137	0.138	0.138	0.151	0.235	0.12	0.109	0.106	0.205	0.167	0.204	0.116	0.131	0.119	0.101	0.148	0.17	0.214	0.111
	13:59:10	30.1	0.183	0.191	0.232	0.117	0.137	0.128	0.19	0.188	0.244	0.119	0.114	0.102	0.161	0.18	0.231	0.115	0.12	0.129	0.167	0.155	0.214	0.116	0.105	0.105	0.175	0.184	0.229	0.115	0.137	0.139	0.145	0.152	0.241	0.123	0.11	0.105	0.208	0.17	0.205	0.117	0.131	0.118	0.101	0.148	0.174	0.221	0.111
	14:29:10	30.1	0.187	0.195	0.237	0.11	0.137	0.126	0.189	0.19	0.254	0.124	0.115	0.102	0.165	0.184	0.233	0.115	0.12	0.127	0.172	0.158	0.223	0.117	0.106	0.105	0.179	0.188	0.234	0.115	0.138	0.139	0.145	0.154	0.248	0.125	0.11	0.105	0.212	0.172	0.206	0.115	0.131	0.12	0.103	0.147	0.177	0.228	0.11
	14:59:10	30.1	0.191	0.2	0.243	0.11	0.139	0.13	0.192	0.192	0.265	0.123	0.116	0.101	0.17	0.188	0.236	0.122	0.118	0.126	0.175	0.161	0.231	0.121	0.107	0.105	0.184	0.192	0.238	0.114	0.138	0.138	0.134	0.157	0.255	0.128	0.111	0.105	0.216	0.174	0.208	0.116	0.131	0.121	0.102	0.148	0.18	0.237	0.11
	15:29:10	30.1	0.193	0.205	0.248	0.109	0.139	0.12	0.192	0.194	0.274	0.127	0.117	0.101	0.174	0.191	0.239	0.121	0.118	0.127	0.181	0.165	0.237	0.124	0.109	0.105	0.188	0.195	0.242	0.115	0.138	0.139	0.14	0.159	0.26	0.131	0.112	0.105	0.218	0.176	0.21	0.117	0.132	0.12	0.104	0.148	0.183	0.242	0.11
	15:59:10	30.1	0.197	0.21	0.254	0.109	0.142	0.132	0.192	0.195	0.284	0.13	0.119	0.101	0.178	0.194	0.242	0.121	0.119	0.127	0.173	0.168	0.246	0.127	0.11	0.105	0.192	0.199	0.247	0.115	0.138	0.153	0.14	0.161	0.266	0.136	0.113	0.105	0.221	0.178	0.211	0.117	0.131	0.138	0.102	0.147	0.185	0.247	0.11
	16:29:10	30.1	0.199	0.215	0.261	0.109	0.142	0.127	0.191	0.198	0.294	0.136	0.12	0.101	0.183	0.198	0.246	0.121	0.119	0.126	0.169	0.174	0.254	0.13	0.112	0.105	0.198	0.202	0.251	0.115	0.136	0.137	0.146	0.167	0.273	0.142	0.115	0.105	0.225	0.18	0.214	0.118	0.132	0.12	0.103	0.148	0.187	0.25	0.11
	16:59:10	30.1	0.202	0.221	0.267	0.109	0.138	0.132	0.186	0.199	0.305	0.138	0.122	0.101	0.19	0.202	0.25	0.123	0.119	0.127	0.177	0.181	0.262	0.135	0.114	0.105	0.203	0.206	0.256	0.115	0.135	0.135	0.149	0.173	0.28	0.15	0.117	0.105	0.229	0.182	0.216	0.118	0.132	0.117	0.105	0.148	0.19	0.255	0.11
	17:29:10	30.1	0.205	0.225	0.273	0.109	0.138	0.125	0.184	0.2	0.314	0.148	0.124	0.101	0.196	0.204	0.253	0.119	0.119	0.126	0.176	0.188	0.269	0.142	0.117	0.105	0.209	0.208	0.262	0.115	0.134	0.135	0.143	0.179	0.283	0.162	0.118	0.105	0.232	0.183	0.219	0.118	0.132	0.12	0.105	0.148	0.192	0.258	0.109
	17:59:10	30.2	0.207	0.23	0.28	0.109	0.141	0.115	0.187	0.2	0.323	0.158	0.126	0.101	0.201	0.207	0.258	0.106	0.117	0.125	0.175	0.192	0.275	0.152	0.119	0.105	0.213	0.21	0.266	0.116	0.136	0.134	0.147	0.183	0.288	0.174	0.119	0.105	0.235	0.185	0.221	0.116	0.132	0.12	0.104	0.149	0.194	0.262	0.109
	18:29:10	30.2	0.208	0.234	0.288	0.11	0.141	0.138	0.181	0.201	0.33	0.171	0.129	0.101	0.206	0.21	0.263	0.106	0.118	0.127	0.173	0.198	0.279	0.16	0.121	0.104	0.218	0.212	0.271	0.122	0.136	0.137	0.141	0.19	0.292	0.188	0.12	0.105	0.238	0.186	0.223	0.121	0.132	0.118	0.102	0.148	0.196	0.266	0.109
	18:59:10	30.2	0.209	0.238	0.296	0.108	0.14	0.137	0.193	0.201	0.336	0.183	0.131	0.101	0.212	0.212	0.268	0.105	0.118	0.124	0.176	0.201	0.284	0.171	0.124	0.104	0.223	0.214	0.275	0.122	0.138	0.286	0.144	0.196	0.297	0.2	0.12	0.105	0.241	0.189	0.225	0.121	0.133	0.12	0.105	0.149	0.197	0.27	0.109
	19:29:10	30.2	0.212	0.242	0.306	0.108	0.139	0.139	0.191	0.201	0.341	0.202	0.133	0.101	0.217	0.215	0.272	0.105	0.118	0.124	0.172	0.206	0.288	0.182	0.126	0.105	0.228	0.217	0.28	0.122	0.137	0.29	0.142	0.202	0.299	0.213	0.12	0.105	0.244	0.191	0.227	0.116	0.133	0.12	0.104	0.149	0.198	0.275	0.109
	19:59:10	30.2	0.213	0.246	0.314	0.108	0.137	0.138	0.186	0.201	0.349	0.222	0.134	0.1	0.224	0.219	0.278	0.105	0.117	0.124	0.171	0.21	0.294	0.198	0.129	0.104	0.234	0.22	0.285	0.123	0.138	0.282	0.14	0.209	0.304	0.242	0.121	0.105	0.249	0.193	0.23	0.119	0.133	0.121	0.12	0.15	0.201	0.281	0.109
	20:29:10	30.2	0.214	0.249	0.322	0.108	0.137	0.136	0.191	0.201	0.354	0.244	0.136	0.1	0.23	0.222	0.283	0.105	0.118	0.127	0.177	0.213	0.3	0.227	0.131	0.104	0.239	0.223	0.29	0.123	0.139	0.284	0.142	0.215	0.306	0.27	0.121	0.105	0.253	0.194	0.232	0.124	0.133	0.148	0.104	0.151	0.203	0.286	0.109
	20:59:10	30.2	0.215	0.252	0.329	0.108	0.135	0.139	0.187	0.201	0.36	0.268	0.136	0.1	0.236	0.224	0.289	0.105	0.118	0.123	0.171	0.217	0.305	0.265	0.132	0.104	0.245	0.225	0.295	0.125	0.139	0.283	0.139	0.222	0.309	0.287	0.122	0.105	0.256	0.195	0.235	0.127	0.134	0.122	0.104	0.153	0.203	0.29	0.109
	21:29:10	30.2	0.216	0.255	0.336	0.108	0.136	0.139	0.188	0.201	0.365	0.299	0.136	0.1	0.242	0.227	0.295	0.105	0.118	0.122	0.185	0.221	0.311	0.291	0.133	0.104	0.25	0.228	0.301	0.126	0.139	0.282	0.139	0.228	0.314	0.303	0.121	0.105	0.26	0.197	0.238	0.128	0.134	0.121	0.105	0.155	0.206	0.294	0.109
	21:59:10	30.2	0.218	0.256	0.341	0.108	0.131	0.141	0.19	0.202	0.367	0.327	0.136	0.1	0.245	0.228	0.298	0.104	0.118	0.123	0.172	0.223	0.311	0.309	0.133	0.104	0.254	0.229	0.305	0.126	0.137	0.284	0.139	0.23	0.315	0.322	0.122	0.105	0.26	0.197	0.24	0.13	0.134	0.121	0.105	0.155	0.207	0.298	0.109
	22:29:10	30.2	0.219	0.255	0.346	0.107	0.136	0.136	0.192	0.204	0.362	0.347	0.135	0.1	0.246	0.229	0.299	0.104	0.118	0.123	0.172	0.221	0.311	0.319	0.134	0.104	0.255	0.229	0.31	0.128	0.134	0.283	0.141	0.227	0.315	0.334	0.121	0.105	0.259	0.197	0.242	0.134	0.134	0.121	0.105	0.156	0.207	0.3	0.109
	22:59:10	30.2	0.223	0.259	0.354	0.107	0.136	0.13	0.193	0.209	0.371	0.365	0.135	0.1	0.25	0.233	0.299	0.105	0.117	0.188	0.179	0.223	0.318	0.323	0.135	0.104	0.261	0.231	0.313	0.128	0.136	0.283	0.14	0.227	0.319	0.343	0.121	0.105	0.267	0.198	0.243	0.137	0.134	0.121	0.105	0.157	0.207	0.303	0.108
	23:29:10	30.2	0.227	0.264	0.36	0.107	0.139	0.134	0.189	0.213	0.383	0.384	0.134	0.1	0.257	0.239	0.305	0.104	0.117	0.187	0.18	0.23	0.328	0.333	0.138	0.104	0.268	0.235	0.319	0.137	0.138	0.282	0.142	0.234	0.326	0.355	0.124	0.107	0.275	0.201	0.246	0.141	0.135	0.121	0.099	0.167	0.21	0.309	0.108
	23:59:10	30.3	0.23	0.267	0.362	0.107	0.144	0.13	0.191	0.216	0.387	0.4	0.134	0.1	0.262	0.242	0.31	0.104	0.119	0.186	0.182	0.233	0.333	0.342	0.139	0.104	0.272	0.239	0.326	0.145	0.137	0.28	0.137	0.239	0.331	0.359	0.128	0.107	0.278	0.204	0.249	0.146	0.135	0.121	0.105	0.175	0.211	0.313	0.108
	1 day, 0:29:10	30.3	0.233	0.269	0.364	0.107	0.144	0.133	0.191	0.22	0.391	0.418	0.133	0.1	0.266	0.243	0.31	0.104	0.119	0.186	0.18	0.235	0.335	0.346	0.14	0.104	0.275	0.24	0.329	0.142	0.139	0.282	0.134	0.242	0.332	0.362	0.13	0.106	0.277	0.204	0.252	0.151	0.135	0.121	0.104	0.179	0.211	0.316	0.109
	1 day, 0:59:10	30.3	0.238	0.272	0.369	0.106	0.142	0.136	0.194	0.222	0.398	0.434	0.132	0.099	0.271	0.249	0.317	0.103	0.118	0.183	0.179	0.237	0.343	0.35	0.14	0.103	0.281	0.244	0.335	0.141	0.137	0.281	0.135	0.246	0.338	0.364	0.132	0.106	0.284	0.206	0.254	0.157	0.135	0.122	0.105	0.186	0.213	0.319	0.108
	1 day, 1:29:10	30.3	0.242	0.273	0.374	0.106	0.142	0.136	0.194	0.223	0.401	0.449	0.13	0.099	0.277	0.253	0.323	0.103	0.117	0.189	0.179	0.238	0.348	0.354	0.14	0.103	0.285	0.248	0.34	0.14	0.137	0.28	0.133	0.249	0.343	0.367	0.132	0.106	0.288	0.208	0.257	0.164	0.135	0.121	0.104	0.193	0.215	0.323	0.108
	1 day, 1:59:10	30.2	0.245	0.273	0.376	0.106	0.142	0.13	0.193	0.225	0.399	0.457	0.129	0.1	0.279	0.254	0.325	0.104	0.118	0.188	0.179	0.238	0.349	0.365	0.141	0.103	0.286	0.249	0.343	0.14	0.138	0.278	0.129	0.249	0.344	0.369	0.132	0.106	0.288	0.208	0.259	0.172	0.135	0.12	0.104	0.194	0.216	0.325	0.109
	1 day, 2:29:10	30.2	0.25	0.276	0.382	0.106	0.14	0.139	0.191	0.228	0.404	0.468	0.129	0.099	0.283	0.252	0.323	0.103	0.118	0.19	0.175	0.242	0.346	0.362	0.141	0.103	0.29	0.25	0.345	0.141	0.135	0.276	0.136	0.252	0.34	0.368	0.133	0.106	0.285	0.21	0.261	0.179	0.135	0.121	0.106	0.185	0.216	0.325	0.108
	1 day, 2:59:10	30.2	0.256	0.278	0.377	0.106	0.14	0.137	0.188	0.231	0.409	0.484	0.127	0.099	0.288	0.254	0.328	0.103	0.117	0.187	0.179	0.245	0.348	0.367	0.143	0.103	0.295	0.253	0.349	0.142	0.134	0.276	0.136	0.256	0.344	0.373	0.135	0.106	0.289	0.211	0.264	0.187	0.135	0.121	0.109	0.189	0.218	0.328	0.109
	1 day, 3:29:10	30.2	0.259	0.279	0.373	0.106	0.14	0.134	0.189	0.233	0.411	0.494	0.126	0.099	0.293	0.256	0.331	0.103	0.117	0.188	0.181	0.247	0.349	0.369	0.145	0.103	0.297	0.255	0.351	0.142	0.135	0.274	0.123	0.258	0.345	0.373	0.135	0.106	0.289	0.211	0.265	0.195	0.136	0.122	0.105	0.189	0.219	0.33	0.109
	1 day, 3:59:10	30.2	0.263	0.281	0.375	0.105	0.138	0.136	0.191	0.234	0.415	0.504	0.124	0.099	0.297	0.258	0.334	0.103	0.117	0.189	0.205	0.248	0.35	0.368	0.147	0.103	0.302	0.258	0.353	0.141	0.136	0.273	0.134	0.259	0.347	0.373	0.135	0.106	0.291	0.211	0.267	0.204	0.136	0.123	0.107	0.192	0.219	0.331	0.109
	1 day, 4:29:10	30.2	0.266	0.282	0.367	0.105	0.139	0.141	0.279	0.237	0.415	0.511	0.123	0.099	0.301	0.261	0.339	0.103	0.118	0.187	0.183	0.248	0.355	0.374	0.149	0.103	0.306	0.261	0.357	0.142	0.134	0.274	0.125	0.26	0.35	0.374	0.132	0.106	0.294	0.212	0.268	0.213	0.136	0.124	0.107	0.197	0.221	0.334	0.112
	1 day, 4:59:10	30.2	0.271	0.283	0.367	0.105	0.139	0.146	0.189	0.238	0.419	0.517	0.122	0.099	0.305	0.266	0.343	0.103	0.118	0.186	0.179	0.249	0.361	0.38	0.15	0.103	0.311	0.264	0.36	0.143	0.137	0.274	0.135	0.263	0.355	0.378	0.132	0.106	0.298	0.214	0.271	0.222	0.136	0.12	0.106	0.205	0.223	0.337	0.109
	1 day, 5:29:10	30.2	0.274	0.284	0.367	0.105	0.138	0.132	0.192	0.241	0.419	0.521	0.121	0.099	0.308	0.267	0.345	0.103	0.118	0.189	0.18	0.251	0.361	0.385	0.151	0.103	0.314	0.266	0.361	0.145	0.14	0.276	0.127	0.264	0.355	0.381	0.134	0.106	0.298	0.213	0.272	0.232	0.136	0.123	0.106	0.208	0.223	0.338	0.109
	1 day, 5:59:10	30.2	0.279	0.286	0.366	0.105	0.137	0.124	0.192	0.245	0.425	0.53	0.121	0.099	0.313	0.27	0.349	0.103	0.118	0.186	0.175	0.253	0.363	0.39	0.152	0.104	0.32	0.268	0.363	0.144	0.138	0.275	0.127	0.267	0.358	0.381	0.137	0.106	0.302	0.214	0.274	0.242	0.136	0.122	0.106	0.214	0.224	0.339	0.109
	1 day, 6:29:10	30.2	0.281	0.287	0.366	0.105	0.137	0.135	0.191	0.247	0.424	0.53	0.121	0.099	0.316	0.273	0.352	0.103	0.118	0.186	0.178	0.254	0.366	0.393	0.152	0.104	0.322	0.27	0.365	0.144	0.138	0.277	0.306	0.268	0.36	0.385	0.138	0.106	0.304	0.215	0.276	0.25	0.136	0.123	0.107	0.217	0.225	0.343	0.11
	1 day, 6:59:10	30.2	0.284	0.288	0.365	0.105	0.138	0.142	0.19	0.249	0.426	0.532	0.12	0.099	0.319	0.275	0.356	0.103	0.118	0.19	0.173	0.255	0.366	0.4	0.153	0.104	0.325	0.273	0.367	0.145	0.137	0.275	0.302	0.269	0.361	0.389	0.14	0.106	0.305	0.216	0.278	0.258	0.136	0.121	0.108	0.219	0.225	0.344	0.11
	1 day, 7:29:10	30.2	0.286	0.29	0.363	0.105	0.137	0.14	0.194	0.253	0.428	0.533	0.12	0.099	0.322	0.278	0.358	0.103	0.116	0.189	0.176	0.256	0.369	0.401	0.155	0.104	0.328	0.274	0.369	0.145	0.137	0.275	0.305	0.272	0.362	0.39	0.141	0.106	0.307	0.216	0.279	0.265	0.135	0.123	0.107	0.223	0.226	0.345	0.111
	1 day, 7:59:10	30.2	0.288	0.291	0.363	0.105	0.137	0.139	0.197	0.255	0.428	0.532	0.12	0.098	0.323	0.28	0.362	0.103	0.117	0.188	0.177	0.258	0.371	0.404	0.154	0.103	0.329	0.276	0.372	0.145	0.136	0.271	0.299	0.273	0.363	0.394	0.141	0.107	0.307	0.216	0.281	0.271	0.136	0.122	0.107	0.225	0.227	0.347	0.111
	1 day, 8:29:10	30.2	0.291	0.293	0.364	0.105	0.137	0.176	0.196	0.258	0.431	0.534	0.12	0.098	0.326	0.283	0.364	0.103	0.116	0.19	0.177	0.259	0.374	0.407	0.155	0.104	0.333	0.279	0.375	0.145	0.136	0.271	0.301	0.275	0.365	0.397	0.141	0.106	0.31	0.217	0.282	0.276	0.136	0.123	0.131	0.229	0.227	0.349	0.111
	1 day, 8:59:10	30.2	0.295	0.296	0.364	0.105	0.136	0.139	0.197	0.263	0.436	0.539	0.12	0.099	0.329	0.285	0.366	0.103	0.117	0.189	0.214	0.261	0.377	0.407	0.154	0.103	0.337	0.281	0.377	0.145	0.136	0.271	0.3	0.277	0.366	0.397	0.144	0.107	0.312	0.217	0.283	0.278	0.136	0.123	0.109	0.233	0.228	0.35	0.11
	1 day, 9:29:10	30.2	0.297	0.297	0.364	0.105	0.136	0.134	0.195	0.266	0.436	0.538	0.12	0.098	0.33	0.288	0.368	0.103	0.115	0.191	0.235	0.261	0.38	0.411	0.154	0.104	0.338	0.283	0.378	0.145	0.133	0.271	0.297	0.278	0.369	0.4	0.145	0.107	0.314	0.218	0.285	0.281	0.136	0.123	0.107	0.236	0.229	0.352	0.11
	1 day, 9:59:10	30.2	0.301	0.299	0.363	0.105	0.136	0.138	0.193	0.269	0.44	0.541	0.12	0.098	0.333	0.291	0.371	0.103	0.116	0.187	0.185	0.264	0.383	0.413	0.153	0.103	0.341	0.285	0.38	0.145	0.133	0.27	0.308	0.281	0.371	0.402	0.147	0.106	0.317	0.22	0.287	0.282	0.136	0.121	0.107	0.24	0.23	0.353	0.111
	1 day, 10:29:10	30.2	0.305	0.302	0.364	0.105	0.136	0.139	0.192	0.272	0.444	0.548	0.12	0.098	0.337	0.293	0.372	0.104	0.117	0.191	0.173	0.265	0.386	0.413	0.153	0.104	0.344	0.287	0.383	0.145	0.136	0.27	0.306	0.283	0.373	0.401	0.15	0.106	0.321	0.22	0.288	0.283	0.136	0.124	0.107	0.245	0.23	0.353	0.111
	1 day, 10:59:10	30.2	0.308	0.305	0.36	0.105	0.136	0.135	0.193	0.276	0.446	0.548	0.119	0.098	0.338	0.296	0.376	0.104	0.117	0.187	0.176	0.266	0.39	0.415	0.153	0.105	0.346	0.29	0.386	0.146	0.135	0.27	0.302	0.284	0.376	0.402	0.151	0.106	0.325	0.22	0.289	0.284	0.136	0.123	0.11	0.247	0.231	0.354	0.111
	1 day, 11:29:10	30.2	0.31	0.307	0.354	0.105	0.136	0.13	0.187	0.278	0.447	0.549	0.119	0.098	0.34	0.299	0.378	0.104	0.116	0.191	0.179	0.267	0.393	0.418	0.15	0.103	0.347	0.293	0.388	0.146	0.136	0.27	0.3	0.286	0.379	0.405	0.154	0.107	0.327	0.222	0.291	0.285	0.136	0.122	0.11	0.249	0.232	0.356	0.111
	1 day, 11:59:10	30.2	0.314	0.31	0.348	0.105	0.135	0.134	0.187	0.281	0.45	0.552	0.119	0.098	0.343	0.302	0.381	0.104	0.117	0.191	0.175	0.268	0.396	0.421	0.147	0.105	0.35	0.295	0.391	0.147	0.137	0.27	0.303	0.288	0.381	0.407	0.156	0.107	0.331	0.223	0.292	0.284	0.136	0.122	0.116	0.25	0.233	0.357	0.111
	1 day, 12:29:10	30.2	0.313	0.31	0.347	0.104	0.135	0.13	0.193	0.282	0.446	0.546	0.119	0.098	0.342	0.303	0.384	0.104	0.117	0.185	0.185	0.268	0.397	0.421	0.147	0.105	0.348	0.296	0.392	0.148	0.135	0.267	0.301	0.289	0.381	0.407	0.158	0.105	0.329	0.223	0.294	0.285	0.136	0.123	0.118	0.248	0.234	0.357	0.112
	1 day, 12:59:10	30.2	0.315	0.312	0.342	0.104	0.135	0.131	0.188	0.284	0.447	0.546	0.119	0.098	0.343	0.305	0.386	0.104	0.117	0.191	0.173	0.259	0.398	0.423	0.146	0.103	0.348	0.299	0.394	0.148	0.137	0.267	0.298	0.289	0.383	0.407	0.16	0.107	0.33	0.224	0.295	0.286	0.135	0.123	0.109	0.247	0.235	0.359	0.112
	1 day, 13:29:10	30.2	0.316	0.313	0.335	0.104	0.135	0.13	0.192	0.286	0.446	0.545	0.119	0.098	0.344	0.308	0.389	0.104	0.115	0.19	0.176	0.258	0.4	0.423	0.147	0.103	0.349	0.301	0.394	0.148	0.135	0.269	0.303	0.29	0.385	0.407	0.162	0.105	0.331	0.225	0.296	0.286	0.135	0.123	0.106	0.248	0.235	0.359	0.112
	1 day, 13:59:10	30.1	0.319	0.317	0.331	0.104	0.135	0.133	0.192	0.29	0.451	0.555	0.119	0.098	0.347	0.31	0.391	0.104	0.117	0.189	0.165	0.262	0.402	0.423	0.149	0.103	0.352	0.302	0.396	0.148	0.137	0.266	0.3	0.292	0.385	0.406	0.164	0.106	0.336	0.225	0.297	0.287	0.135	0.124	0.105	0.25	0.235	0.359	0.112
	1 day, 14:29:10	30.1	0.321	0.319	0.333	0.104	0.135	0.129	0.192	0.292	0.452	0.561	0.12	0.098	0.349	0.311	0.393	0.104	0.115	0.189	0.167	0.265	0.404	0.423	0.155	0.103	0.353	0.304	0.399	0.149	0.136	0.265	0.3	0.293	0.386	0.406	0.166	0.105	0.339	0.225	0.298	0.288	0.136	0.123	0.111	0.251	0.235	0.36	0.113
	1 day, 14:59:10	30.1	0.323	0.322	0.337	0.104	0.135	0.134	0.189	0.295	0.453	0.564	0.119	0.098	0.351	0.315	0.394	0.104	0.117	0.192	0.165	0.267	0.407	0.426	0.153	0.104	0.355	0.307	0.401	0.149	0.134	0.268	0.3	0.293	0.388	0.407	0.167	0.107	0.342	0.226	0.299	0.289	0.135	0.124	0.118	0.254	0.236	0.36	0.113
	1 day, 15:29:10	30.1	0.323	0.321	0.338	0.104	0.135	0.126	0.197	0.295	0.449	0.561	0.119	0.098	0.349	0.316	0.396	0.105	0.116	0.193	0.173	0.268	0.407	0.428	0.15	0.104	0.353	0.308	0.403	0.15	0.137	0.266	0.297	0.293	0.389	0.408	0.169	0.105	0.34	0.226	0.3	0.291	0.135	0.122	0.138	0.254	0.236	0.361	0.113
	1 day, 15:59:10	30.1	0.328	0.326	0.336	0.104	0.135	0.132	0.191	0.3	0.456	0.564	0.119	0.098	0.354	0.32	0.401	0.105	0.116	0.189	0.224	0.274	0.413	0.433	0.144	0.103	0.358	0.311	0.408	0.151	0.136	0.264	0.301	0.296	0.393	0.411	0.169	0.105	0.347	0.228	0.302	0.294	0.135	0.125	0.108	0.258	0.238	0.363	0.114
	1 day, 16:29:10	30.1	0.327	0.325	0.329	0.104	0.135	0.127	0.192	0.3	0.453	0.562	0.12	0.098	0.351	0.322	0.403	0.105	0.117	0.192	0.229	0.278	0.414	0.438	0.141	0.103	0.355	0.312	0.41	0.151	0.137	0.267	0.302	0.296	0.394	0.413	0.17	0.106	0.345	0.229	0.303	0.295	0.135	0.122	0.112	0.258	0.239	0.364	0.114
	1 day, 16:59:10	30.1	0.33	0.33	0.325	0.104	0.134	0.127	0.191	0.303	0.459	0.566	0.12	0.098	0.355	0.325	0.404	0.105	0.117	0.19	0.227	0.281	0.418	0.442	0.138	0.104	0.358	0.314	0.411	0.152	0.139	0.266	0.306	0.297	0.396	0.414	0.17	0.106	0.351	0.229	0.304	0.297	0.136	0.124	0.109	0.262	0.239	0.365	0.115
	1 day, 17:29:10	30.2	0.33	0.329	0.322	0.105	0.135	0.13	0.189	0.304	0.455	0.558	0.12	0.098	0.353	0.327	0.408	0.106	0.116	0.188	0.232	0.285	0.418	0.443	0.136	0.103	0.357	0.315	0.413	0.152	0.139	0.265	0.297	0.298	0.398	0.416	0.17	0.105	0.35	0.23	0.305	0.299	0.135	0.124	0.111	0.261	0.24	0.366	0.116
	1 day, 17:59:10	30.2	0.331	0.331	0.312	0.104	0.134	0.128	0.189	0.305	0.456	0.556	0.12	0.098	0.352	0.328	0.411	0.106	0.115	0.187	0.223	0.288	0.419	0.442	0.136	0.104	0.356	0.316	0.415	0.153	0.139	0.264	0.302	0.299	0.399	0.417	0.17	0.107	0.35	0.23	0.305	0.301	0.135	0.123	0.113	0.262	0.24	0.368	0.116
	1 day, 18:29:10	30.2	0.332	0.333	0.303	0.105	0.133	0.125	0.19	0.307	0.455	0.558	0.12	0.098	0.352	0.328	0.41	0.106	0.115	0.188	0.228	0.291	0.418	0.44	0.137	0.102	0.356	0.315	0.414	0.154	0.139	0.265	0.301	0.3	0.398	0.415	0.168	0.105	0.35	0.23	0.306	0.301	0.135	0.125	0.109	0.262	0.24	0.368	0.117
	1 day, 18:59:10	30.2	0.334	0.335	0.299	0.105	0.134	0.127	0.193	0.308	0.457	0.56	0.12	0.098	0.352	0.331	0.414	0.106	0.116	0.191	0.216	0.294	0.422	0.443	0.14	0.104	0.357	0.318	0.416	0.155	0.136	0.265	0.298	0.301	0.401	0.417	0.167	0.107	0.352	0.231	0.307	0.304	0.135	0.122	0.117	0.264	0.241	0.369	0.118
	1 day, 19:29:10	30.2	0.337	0.338	0.291	0.105	0.135	0.132	0.194	0.312	0.46	0.562	0.121	0.098	0.353	0.333	0.416	0.106	0.116	0.189	0.217	0.297	0.426	0.445	0.143	0.103	0.359	0.319	0.419	0.156	0.138	0.265	0.298	0.303	0.404	0.418	0.165	0.106	0.355	0.232	0.309	0.305	0.135	0.124	0.107	0.266	0.242	0.372	0.119
	1 day, 19:59:10	30.2	0.337	0.338	0.291	0.105	0.135	0.124	0.193	0.313	0.458	0.558	0.121	0.098	0.352	0.333	0.417	0.107	0.116	0.189	0.216	0.299	0.425	0.443	0.145	0.102	0.357	0.318	0.419	0.157	0.138	0.267	0.296	0.301	0.402	0.417	0.164	0.107	0.354	0.231	0.309	0.306	0.135	0.124	0.108	0.266	0.241	0.371	0.12
	1 day, 20:29:10	30.2	0.339	0.341	0.281	0.105	0.134	0.127	0.192	0.315	0.46	0.56	0.121	0.098	0.351	0.335	0.419	0.107	0.116	0.189	0.218	0.301	0.428	0.444	0.14	0.102	0.358	0.32	0.42	0.158	0.136	0.268	0.297	0.301	0.404	0.418	0.162	0.108	0.355	0.232	0.31	0.307	0.135	0.123	0.113	0.266	0.242	0.374	0.122
	1 day, 20:59:10	30.2	0.34	0.341	0.273	0.105	0.133	0.128	0.192	0.316	0.459	0.558	0.122	0.098	0.35	0.335	0.419	0.107	0.116	0.187	0.216	0.303	0.427	0.443	0.133	0.104	0.357	0.319	0.42	0.158	0.139	0.266	0.29	0.302	0.402	0.417	0.158	0.108	0.354	0.232	0.31	0.309	0.135	0.123	0.275	0.266	0.241	0.373	0.123
	1 day, 21:29:10	30.3	0.337	0.339	0.264	0.105	0.133	0.126	0.194	0.315	0.456	0.547	0.123	0.098	0.341	0.339	0.422	0.107	0.117	0.186	0.211	0.3	0.429	0.448	0.132	0.104	0.348	0.321	0.42	0.158	0.133	0.265	0.3	0.3	0.406	0.421	0.157	0.11	0.345	0.233	0.311	0.309	0.135	0.125	0.11	0.261	0.242	0.373	0.125
	1 day, 21:59:10	30.3	0.342	0.344	0.261	0.105	0.131	0.126	0.187	0.321	0.463	0.559	0.124	0.098	0.347	0.347	0.432	0.108	0.117	0.186	0.209	0.306	0.44	0.461	0.132	0.104	0.354	0.327	0.426	0.158	0.129	0.267	0.3	0.305	0.418	0.43	0.151	0.109	0.352	0.237	0.313	0.316	0.135	0.123	0.114	0.266	0.247	0.38	0.127
	1 day, 22:29:10	30.4	0.346	0.348	0.259	0.105	0.131	0.129	0.182	0.323	0.468	0.567	0.124	0.098	0.351	0.354	0.441	0.108	0.117	0.188	0.201	0.311	0.448	0.471	0.128	0.102	0.358	0.334	0.432	0.159	0.126	0.265	0.288	0.307	0.428	0.438	0.16	0.11	0.356	0.241	0.316	0.322	0.135	0.124	0.114	0.269	0.251	0.385	0.129
	1 day, 22:59:10	30.5	0.347	0.35	0.257	0.105	0.131	0.127	0.183	0.324	0.47	0.568	0.124	0.098	0.351	0.356	0.445	0.108	0.117	0.185	0.204	0.314	0.451	0.479	0.125	0.103	0.358	0.336	0.434	0.16	0.119	0.267	0.289	0.309	0.432	0.442	0.164	0.109	0.358	0.243	0.318	0.326	0.135	0.123	0.112	0.269	0.252	0.386	0.131
	1 day, 23:29:10	30.6	0.348	0.351	0.259	0.105	0.131	0.127	0.194	0.325	0.469	0.568	0.124	0.098	0.351	0.356	0.446	0.109	0.117	0.183	0.226	0.314	0.45	0.477	0.125	0.104	0.357	0.334	0.435	0.161	0.13	0.266	0.298	0.312	0.43	0.44	0.165	0.109	0.358	0.242	0.318	0.328	0.135	0.123	0.115	0.269	0.251	0.384	0.134
	1 day, 23:59:10	30.6	0.349	0.352	0.259	0.105	0.131	0.129	0.19	0.325	0.471	0.567	0.124	0.098	0.349	0.358	0.45	0.109	0.117	0.185	0.22	0.315	0.453	0.48	0.124	0.103	0.356	0.337	0.438	0.161	0.126	0.268	0.296	0.314	0.434	0.444	0.162	0.109	0.356	0.244	0.32	0.331	0.135	0.123	0.115	0.268	0.253	0.385	0.137
	2 days, 0:29:10	30.6	0.352	0.355	0.257	0.106	0.131	0.125	0.194	0.328	0.475	0.572	0.124	0.098	0.352	0.362	0.455	0.109	0.117	0.182	0.214	0.318	0.457	0.487	0.123	0.102	0.359	0.34	0.441	0.162	0.136	0.272	0.293	0.316	0.438	0.447	0.156	0.109	0.36	0.246	0.322	0.335	0.135	0.125	0.114	0.27	0.255	0.387	0.139
	2 days, 0:59:10	30.6	0.353	0.357	0.256	0.106	0.131	0.126	0.193	0.328	0.475	0.57	0.124	0.098	0.35	0.363	0.457	0.109	0.117	0.183	0.221	0.318	0.457	0.488	0.124	0.103	0.357	0.341	0.442	0.164	0.127	0.27	0.302	0.317	0.438	0.448	0.156	0.109	0.358	0.246	0.323	0.34	0.135	0.124	0.115	0.268	0.256	0.387	0.142
	2 days, 1:29:10	30.4	0.356	0.359	0.253	0.106	0.13	0.127	0.183	0.33	0.479	0.574	0.123	0.098	0.351	0.366	0.459	0.11	0.117	0.185	0.206	0.32	0.461	0.494	0.124	0.104	0.358	0.344	0.445	0.165	0.121	0.264	0.299	0.319	0.441	0.45	0.155	0.109	0.36	0.248	0.324	0.343	0.135	0.124	0.11	0.268	0.257	0.389	0.146
	2 days, 1:59:10	30.4	0.358	0.361	0.256	0.106	0.13	0.129	0.191	0.332	0.479	0.575	0.124	0.098	0.35	0.368	0.461	0.11	0.117	0.184	0.216	0.321	0.461	0.495	0.124	0.104	0.357	0.345	0.445	0.166	0.131	0.268	0.303	0.321	0.441	0.45	0.158	0.108	0.361	0.249	0.325	0.346	0.135	0.126	0.11	0.268	0.257	0.387	0.15
	2 days, 2:29:10	30.3	0.36	0.362	0.256	0.106	0.13	0.127	0.189	0.333	0.481	0.574	0.124	0.098	0.349	0.369	0.462	0.11	0.117	0.185	0.217	0.321	0.462	0.49	0.121	0.102	0.357	0.345	0.446	0.166	0.131	0.267	0.301	0.322	0.44	0.451	0.159	0.108	0.361	0.248	0.326	0.348	0.135	0.125	0.114	0.267	0.256	0.386	0.154
	2 days, 2:59:10	30.2	0.362	0.364	0.255	0.106	0.13	0.126	0.187	0.336	0.483	0.573	0.124	0.097	0.349	0.371	0.465	0.11	0.117	0.185	0.216	0.323	0.465	0.494	0.118	0.101	0.357	0.348	0.449	0.167	0.124	0.264	0.294	0.325	0.443	0.452	0.157	0.108	0.363	0.25	0.327	0.352	0.135	0.124	0.112	0.266	0.258	0.387	0.157
	2 days, 3:29:10	30.2	0.363	0.364	0.258	0.106	0.13	0.124	0.191	0.336	0.484	0.565	0.124	0.098	0.346	0.372	0.466	0.111	0.117	0.186	0.229	0.322	0.466	0.496	0.116	0.102	0.354	0.349	0.453	0.166	0.125	0.269	0.297	0.326	0.444	0.454	0.157	0.107	0.361	0.251	0.328	0.355	0.135	0.124	0.114	0.265	0.259	0.388	0.16
	2 days, 3:59:10	30.2	0.358	0.361	0.263	0.106	0.13	0.125	0.192	0.332	0.475	0.56	0.124	0.098	0.338	0.369	0.466	0.119	0.117	0.186	0.212	0.317	0.458	0.491	0.114	0.103	0.345	0.348	0.453	0.167	0.124	0.268	0.306	0.322	0.44	0.447	0.155	0.107	0.351	0.25	0.328	0.356	0.135	0.126	0.113	0.26	0.257	0.389	0.162
	2 days, 4:29:10	30.2	0.359	0.363	0.269	0.106	0.13	0.129	0.192	0.335	0.481	0.566	0.125	0.098	0.337	0.361	0.456	0.121	0.118	0.186	0.217	0.318	0.452	0.473	0.114	0.103	0.345	0.337	0.445	0.168	0.126	0.265	0.305	0.326	0.422	0.433	0.153	0.108	0.352	0.244	0.326	0.349	0.135	0.124	0.112	0.261	0.25	0.378	0.166
	2 days, 4:59:10	30.2	0.365	0.365	0.286	0.106	0.13	0.128	0.193	0.34	0.483	0.57	0.126	0.098	0.343	0.365	0.457	0.124	0.117	0.184	0.211	0.323	0.458	0.477	0.113	0.102	0.35	0.336	0.445	0.169	0.127	0.263	0.296	0.331	0.423	0.433	0.151	0.108	0.359	0.244	0.326	0.351	0.135	0.125	0.115	0.264	0.251	0.377	0.168
	2 days, 5:29:10	30.2	0.366	0.366	0.306	0.107	0.13	0.126	0.192	0.34	0.483	0.567	0.126	0.098	0.341	0.365	0.459	0.124	0.118	0.183	0.209	0.322	0.458	0.478	0.113	0.102	0.347	0.337	0.446	0.17	0.125	0.265	0.303	0.332	0.424	0.433	0.15	0.108	0.355	0.245	0.326	0.353	0.135	0.126	0.115	0.262	0.252	0.378	0.171
	2 days, 5:59:10	30.2	0.37	0.37	0.337	0.107	0.13	0.125	0.192	0.345	0.486	0.572	0.127	0.097	0.344	0.368	0.459	0.124	0.117	0.188	0.207	0.326	0.463	0.469	0.111	0.104	0.35	0.337	0.446	0.17	0.127	0.266	0.303	0.335	0.424	0.432	0.148	0.11	0.358	0.244	0.326	0.356	0.135	0.124	0.109	0.264	0.251	0.376	0.174
	2 days, 6:29:10	30.2	0.368	0.369	0.354	0.107	0.13	0.126	0.191	0.343	0.485	0.567	0.127	0.097	0.34	0.366	0.456	0.125	0.117	0.184	0.223	0.323	0.458	0.469	0.111	0.102	0.346	0.336	0.446	0.171	0.128	0.264	0.3	0.333	0.422	0.432	0.148	0.11	0.353	0.245	0.327	0.358	0.135	0.124	0.113	0.261	0.251	0.376	0.178
	2 days, 6:59:10	30.2	0.37	0.371	0.369	0.107	0.13	0.123	0.19	0.346	0.487	0.571	0.127	0.097	0.34	0.367	0.458	0.125	0.117	0.186	0.229	0.325	0.461	0.475	0.111	0.104	0.347	0.336	0.445	0.172	0.129	0.264	0.3	0.335	0.421	0.432	0.147	0.108	0.354	0.244	0.327	0.36	0.135	0.126	0.148	0.261	0.251	0.374	0.182
	2 days, 7:29:10	30.2	0.371	0.373	0.383	0.107	0.13	0.124	0.191	0.348	0.489	0.572	0.127	0.097	0.34	0.369	0.46	0.125	0.117	0.186	0.22	0.325	0.462	0.473	0.111	0.104	0.346	0.337	0.446	0.172	0.129	0.26	0.3	0.336	0.422	0.436	0.146	0.108	0.354	0.245	0.327	0.362	0.135	0.126	0.111	0.261	0.251	0.376	0.188
	2 days, 7:59:10	30.1	0.374	0.376	0.397	0.107	0.13	0.129	0.19	0.351	0.493	0.577	0.127	0.097	0.342	0.371	0.462	0.125	0.117	0.185	0.217	0.328	0.467	0.469	0.11	0.104	0.349	0.337	0.447	0.173	0.129	0.259	0.297	0.338	0.423	0.437	0.146	0.109	0.356	0.246	0.328	0.364	0.135	0.128	0.116	0.262	0.252	0.376	0.191
	2 days, 8:29:10	30.1	0.375	0.377	0.409	0.107	0.13	0.128	0.19	0.352	0.494	0.58	0.126	0.097	0.342	0.374	0.464	0.124	0.117	0.186	0.216	0.329	0.469	0.469	0.11	0.102	0.348	0.338	0.448	0.174	0.129	0.259	0.298	0.339	0.424	0.435	0.148	0.11	0.355	0.246	0.328	0.366	0.135	0.127	0.115	0.262	0.252	0.376	0.196
	2 days, 8:59:10	30.1	0.376	0.378	0.417	0.107	0.13	0.125	0.188	0.353	0.496	0.58	0.126	0.097	0.342	0.374	0.467	0.123	0.117	0.189	0.219	0.33	0.471	0.473	0.109	0.104	0.348	0.34	0.45	0.175	0.129	0.258	0.3	0.339	0.428	0.443	0.143	0.109	0.354	0.248	0.329	0.369	0.135	0.126	0.111	0.261	0.254	0.379	0.2
	2 days, 9:29:10	30.2	0.381	0.383	0.429	0.107	0.129	0.125	0.188	0.357	0.502	0.587	0.126	0.097	0.346	0.379	0.472	0.119	0.118	0.191	0.213	0.335	0.479	0.478	0.108	0.102	0.352	0.343	0.451	0.175	0.129	0.26	0.306	0.342	0.432	0.446	0.14	0.11	0.358	0.249	0.33	0.372	0.135	0.126	0.115	0.262	0.256	0.382	0.204
	2 days, 9:59:10	30.1	0.382	0.385	0.437	0.107	0.129	0.126	0.19	0.357	0.503	0.59	0.125	0.097	0.346	0.381	0.474	0.118	0.118	0.195	0.221	0.336	0.482	0.483	0.108	0.101	0.352	0.343	0.456	0.177	0.129	0.259	0.305	0.342	0.433	0.448	0.138	0.111	0.358	0.249	0.331	0.374	0.135	0.124	0.125	0.26	0.256	0.381	0.208
	2 days, 10:29:10	30.1	0.384	0.387	0.447	0.107	0.129	0.125	0.188	0.359	0.506	0.594	0.124	0.097	0.348	0.383	0.477	0.118	0.117	0.188	0.216	0.338	0.486	0.486	0.107	0.101	0.353	0.345	0.458	0.178	0.13	0.257	0.303	0.344	0.436	0.446	0.136	0.114	0.36	0.25	0.332	0.378	0.135	0.128	0.11	0.259	0.257	0.382	0.213
	2 days, 10:59:10	30.1	0.383	0.387	0.456	0.107	0.129	0.124	0.192	0.358	0.504	0.592	0.124	0.097	0.346	0.382	0.477	0.118	0.118	0.191	0.221	0.337	0.485	0.484	0.107	0.103	0.351	0.345	0.458	0.178	0.13	0.258	0.303	0.342	0.436	0.446	0.135	0.114	0.356	0.251	0.333	0.38	0.135	0.126	0.112	0.258	0.258	0.381	0.218
	2 days, 11:29:10	30.1	0.383	0.388	0.462	0.107	0.129	0.125	0.191	0.358	0.506	0.592	0.123	0.097	0.345	0.381	0.48	0.117	0.118	0.188	0.213	0.337	0.486	0.482	0.106	0.103	0.35	0.344	0.456	0.178	0.13	0.261	0.303	0.342	0.435	0.446	0.137	0.114	0.356	0.251	0.333	0.382	0.135	0.125	0.148	0.257	0.258	0.381	0.222
	2 days, 11:59:10	30.1	0.384	0.39	0.469	0.108	0.129	0.127	0.189	0.359	0.509	0.593	0.122	0.097	0.346	0.384	0.483	0.122	0.118	0.189	0.228	0.339	0.49	0.484	0.106	0.104	0.351	0.346	0.456	0.178	0.131	0.26	0.303	0.343	0.438	0.447	0.137	0.114	0.357	0.252	0.334	0.385	0.135	0.128	0.111	0.257	0.259	0.383	0.225
	2 days, 12:29:10	30.1	0.381	0.389	0.478	0.108	0.129	0.123	0.19	0.356	0.507	0.59	0.121	0.097	0.343	0.381	0.484	0.124	0.118	0.192	0.227	0.336	0.486	0.484	0.106	0.105	0.347	0.344	0.457	0.179	0.131	0.26	0.302	0.339	0.434	0.447	0.136	0.115	0.352	0.252	0.334	0.386	0.135	0.125	0.109	0.255	0.258	0.383	0.227
	2 days, 12:59:10	30.1	0.384	0.392	0.485	0.108	0.129	0.125	0.189	0.359	0.511	0.595	0.121	0.097	0.345	0.383	0.487	0.123	0.118	0.19	0.21	0.339	0.491	0.488	0.105	0.107	0.349	0.345	0.459	0.179	0.131	0.258	0.304	0.342	0.436	0.445	0.135	0.115	0.354	0.252	0.334	0.388	0.135	0.127	0.127	0.255	0.258	0.382	0.23
	2 days, 13:29:10	30.1	0.384	0.393	0.489	0.108	0.129	0.124	0.185	0.36	0.514	0.599	0.121	0.097	0.346	0.385	0.491	0.127	0.118	0.195	0.223	0.34	0.496	0.49	0.104	0.107	0.35	0.346	0.46	0.179	0.131	0.259	0.304	0.342	0.439	0.445	0.131	0.115	0.355	0.253	0.335	0.391	0.135	0.126	0.113	0.255	0.26	0.382	0.233
	2 days, 13:59:10	30.1	0.381	0.393	0.493	0.108	0.129	0.126	0.185	0.357	0.512	0.598	0.12	0.097	0.344	0.383	0.491	0.127	0.118	0.192	0.22	0.338	0.493	0.493	0.104	0.107	0.347	0.346	0.462	0.179	0.131	0.26	0.302	0.34	0.439	0.444	0.123	0.115	0.352	0.253	0.335	0.393	0.135	0.127	0.115	0.254	0.26	0.382	0.235
	2 days, 14:29:10	30.1	0.383	0.395	0.499	0.108	0.129	0.127	0.186	0.358	0.515	0.601	0.119	0.097	0.346	0.385	0.493	0.126	0.118	0.191	0.217	0.34	0.496	0.494	0.104	0.101	0.348	0.347	0.464	0.18	0.131	0.26	0.302	0.341	0.441	0.447	0.125	0.115	0.353	0.254	0.336	0.395	0.134	0.126	0.183	0.254	0.261	0.384	0.237
	2 days, 14:59:10	30.1	0.384	0.397	0.501	0.108	0.129	0.123	0.188	0.357	0.517	0.603	0.119	0.097	0.346	0.387	0.495	0.125	0.118	0.187	0.207	0.341	0.499	0.491	0.104	0.103	0.349	0.347	0.464	0.181	0.131	0.26	0.31	0.341	0.447	0.449	0.124	0.115	0.354	0.254	0.336	0.396	0.134	0.126	0.113	0.254	0.261	0.382	0.239
	2 days, 15:29:10	30.1	0.385	0.399	0.504	0.108	0.129	0.126	0.187	0.356	0.521	0.607	0.119	0.097	0.348	0.389	0.5	0.129	0.118	0.188	0.212	0.343	0.504	0.496	0.103	0.101	0.35	0.35	0.467	0.179	0.131	0.257	0.306	0.343	0.455	0.454	0.125	0.115	0.354	0.256	0.338	0.4	0.135	0.125	0.115	0.253	0.264	0.386	0.242
	2 days, 15:59:10	30.1	0.386	0.401	0.509	0.108	0.129	0.126	0.19	0.355	0.525	0.61	0.118	0.097	0.35	0.392	0.5	0.13	0.118	0.189	0.206	0.344	0.508	0.498	0.102	0.1	0.351	0.351	0.469	0.181	0.131	0.258	0.307	0.344	0.456	0.456	0.128	0.115	0.356	0.256	0.339	0.401	0.134	0.125	0.112	0.253	0.263	0.385	0.244
	2 days, 16:29:10	30.1	0.383	0.4	0.511	0.108	0.129	0.127	0.186	0.35	0.523	0.608	0.117	0.096	0.348	0.39	0.502	0.128	0.118	0.193	0.213	0.342	0.505	0.496	0.103	0.1	0.349	0.351	0.47	0.184	0.131	0.259	0.309	0.343	0.457	0.459	0.122	0.115	0.353	0.256	0.339	0.403	0.134	0.131	0.115	0.251	0.264	0.384	0.246
	2 days, 16:59:10	30.1	0.382	0.401	0.515	0.108	0.129	0.126	0.19	0.348	0.523	0.608	0.117	0.097	0.347	0.389	0.502	0.13	0.118	0.195	0.203	0.342	0.504	0.5	0.103	0.101	0.348	0.35	0.47	0.184	0.131	0.255	0.311	0.342	0.454	0.462	0.116	0.115	0.352	0.256	0.339	0.405	0.134	0.124	0.112	0.251	0.264	0.385	0.248
	2 days, 17:29:10	30.1	0.378	0.4	0.516	0.108	0.129	0.123	0.187	0.343	0.521	0.607	0.117	0.096	0.345	0.387	0.503	0.126	0.118	0.192	0.208	0.34	0.502	0.501	0.103	0.101	0.345	0.349	0.472	0.185	0.131	0.254	0.305	0.34	0.452	0.457	0.115	0.115	0.349	0.257	0.34	0.407	0.134	0.125	0.12	0.25	0.264	0.386	0.25
	2 days, 17:59:10	30.1	0.38	0.403	0.523	0.108	0.129	0.127	0.188	0.343	0.527	0.612	0.117	0.096	0.347	0.391	0.508	0.128	0.118	0.191	0.204	0.342	0.506	0.513	0.104	0.102	0.347	0.351	0.471	0.184	0.131	0.26	0.311	0.342	0.456	0.457	0.114	0.116	0.352	0.258	0.341	0.409	0.134	0.127	0.233	0.251	0.266	0.387	0.252
	2 days, 18:29:10	30.1	0.376	0.402	0.525	0.109	0.129	0.123	0.193	0.338	0.524	0.61	0.116	0.096	0.345	0.388	0.507	0.13	0.118	0.189	0.215	0.34	0.502	0.517	0.102	0.103	0.345	0.349	0.473	0.184	0.131	0.258	0.309	0.34	0.457	0.451	0.113	0.115	0.349	0.258	0.341	0.411	0.134	0.125	0.114	0.25	0.266	0.388	0.254
	2 days, 18:59:10	30.1	0.376	0.403	0.528	0.109	0.129	0.126	0.192	0.335	0.526	0.612	0.116	0.096	0.345	0.39	0.509	0.131	0.118	0.189	0.218	0.341	0.505	0.521	0.102	0.101	0.345	0.349	0.471	0.185	0.131	0.259	0.308	0.341	0.453	0.448	0.111	0.117	0.349	0.257	0.341	0.412	0.134	0.129	0.113	0.251	0.265	0.386	0.257
	2 days, 19:29:10	30	0.374	0.404	0.532	0.109	0.129	0.125	0.192	0.332	0.526	0.613	0.116	0.096	0.345	0.389	0.509	0.127	0.118	0.19	0.214	0.34	0.506	0.521	0.102	0.105	0.345	0.348	0.473	0.185	0.131	0.259	0.309	0.341	0.456	0.445	0.111	0.116	0.349	0.256	0.34	0.412	0.134	0.126	0.111	0.251	0.264	0.384	0.259
	2 days, 19:59:10	30.1	0.372	0.404	0.536	0.109	0.129	0.123	0.19	0.328	0.528	0.612	0.115	0.096	0.345	0.39	0.512	0.124	0.118	0.196	0.212	0.34	0.506	0.522	0.102	0.105	0.344	0.348	0.476	0.185	0.131	0.26	0.308	0.34	0.457	0.446	0.109	0.116	0.348	0.257	0.341	0.414	0.134	0.125	0.153	0.251	0.266	0.385	0.261
	2 days, 20:29:10	30.1	0.374	0.408	0.543	0.109	0.129	0.122	0.193	0.328	0.534	0.619	0.115	0.096	0.347	0.395	0.517	0.13	0.118	0.189	0.215	0.344	0.513	0.53	0.102	0.107	0.347	0.351	0.478	0.186	0.131	0.258	0.302	0.343	0.464	0.449	0.107	0.116	0.352	0.259	0.342	0.417	0.134	0.127	0.116	0.252	0.268	0.387	0.263
	2 days, 20:59:10	30.1	0.37	0.406	0.544	0.109	0.129	0.124	0.194	0.321	0.532	0.616	0.114	0.096	0.345	0.392	0.516	0.13	0.118	0.19	0.219	0.342	0.507	0.524	0.102	0.107	0.345	0.35	0.477	0.187	0.131	0.261	0.303	0.341	0.457	0.453	0.107	0.117	0.349	0.259	0.342	0.419	0.134	0.127	0.119	0.252	0.268	0.387	0.265
	2 days, 21:29:10	30.1	0.367	0.407	0.547	0.109	0.129	0.124	0.196	0.317	0.532	0.618	0.114	0.096	0.344	0.392	0.519	0.133	0.118	0.189	0.205	0.342	0.507	0.525	0.102	0.108	0.344	0.35	0.48	0.187	0.131	0.26	0.302	0.34	0.458	0.463	0.107	0.116	0.348	0.26	0.343	0.421	0.134	0.125	0.112	0.252	0.27	0.388	0.268
	2 days, 21:59:10	30.1	0.366	0.408	0.552	0.109	0.129	0.125	0.198	0.313	0.534	0.621	0.114	0.096	0.344	0.393	0.52	0.133	0.118	0.189	0.206	0.342	0.507	0.523	0.102	0.108	0.345	0.35	0.479	0.188	0.131	0.26	0.303	0.341	0.456	0.455	0.107	0.117	0.349	0.259	0.343	0.421	0.134	0.131	0.112	0.253	0.268	0.385	0.27
	2 days, 22:29:10	30.1	0.364	0.409	0.555	0.109	0.129	0.125	0.198	0.308	0.535	0.621	0.114	0.096	0.345	0.393	0.523	0.131	0.118	0.189	0.22	0.342	0.507	0.525	0.102	0.108	0.345	0.35	0.48	0.188	0.132	0.259	0.299	0.341	0.457	0.458	0.106	0.117	0.349	0.26	0.343	0.423	0.134	0.128	0.113	0.254	0.27	0.386	0.273
	2 days, 22:59:10	30.1	0.361	0.41	0.557	0.109	0.129	0.125	0.198	0.302	0.536	0.624	0.113	0.096	0.345	0.394	0.525	0.128	0.118	0.186	0.201	0.342	0.508	0.52	0.102	0.107	0.345	0.35	0.48	0.189	0.131	0.259	0.298	0.341	0.457	0.456	0.106	0.116	0.349	0.259	0.343	0.423	0.134	0.127	0.224	0.254	0.27	0.384	0.275
	2 days, 23:29:10	30.1	0.359	0.41	0.559	0.109	0.129	0.127	0.197	0.297	0.537	0.624	0.113	0.096	0.344	0.394	0.526	0.133	0.118	0.187	0.223	0.342	0.508	0.52	0.102	0.107	0.345	0.35	0.48	0.189	0.131	0.259	0.309	0.34	0.457	0.455	0.106	0.116	0.349	0.258	0.343	0.423	0.134	0.128	0.148	0.255	0.269	0.382	0.277
	2 days, 23:59:10	30.1	0.357	0.412	0.561	0.11	0.129	0.122	0.196	0.291	0.539	0.626	0.112	0.096	0.345	0.395	0.529	0.134	0.118	0.19	0.213	0.343	0.508	0.526	0.102	0.107	0.345	0.351	0.482	0.189	0.131	0.261	0.309	0.341	0.46	0.457	0.105	0.117	0.35	0.261	0.344	0.425	0.134	0.128	0.113	0.256	0.271	0.385	0.279
	3 days, 0:29:10	30.1	0.353	0.413	0.563	0.11	0.129	0.125	0.197	0.283	0.539	0.627	0.111	0.096	0.345	0.395	0.531	0.134	0.118	0.189	0.223	0.343	0.507	0.533	0.101	0.107	0.344	0.352	0.485	0.189	0.131	0.26	0.305	0.34	0.458	0.464	0.105	0.117	0.349	0.262	0.345	0.427	0.134	0.127	0.111	0.256	0.273	0.387	0.281
Results
		1	2	3	4	5	6	7	8	9	10	11	12
	A	0.288	0.295	0.736	0.056	0.129	0.269	0.595	0.298	0.375	0.884	0.074	0.021	Max V [600]
		0.997	0.987	0.991	0.896	0.744	0.572	0.502	0.985	0.963	0.996	1	0.798	R-Squared [600]
		04:59:10	04:29:10	2 days, 5:29:10	02:29:10	02:29:10	1 day, 7:29:10	1 day, 3:29:10	04:59:10	06:29:10	21:29:10	18:29:10	01:29:10	t at Max V [600]
		02:59:02	02:49:49	2 days, 0:43:00	01:21:37	02:09:32	1 day, 5:09:46	1 day, 3:32:11	03:23:24	04:23:37	17:51:51	14:06:22	00:30:07	Lagtime [600]
	B	0.304	0.366	0.68	-0.161	0.109	0.65	0.616	0.317	0.359	0.952	-0.131	-0.073	Max V [600]
		0.99	0.998	0.975	0.81	0.783	0.756	0.817	0.984	0.988	0.985	0.989	0.96	R-Squared [600]
		04:59:10	04:29:10	11:29:10	17:59:10	02:59:10	22:29:10	1 day, 15:29:10	04:59:10	05:59:10	20:59:10	1 day, 15:59:10	08:59:10	t at Max V [600]
		03:31:36	03:14:08	09:44:37	18:14:47	02:17:17	21:26:00	1 day, 15:21:54	03:24:39	04:18:59	18:18:06	1 day, 20:54:36	08:55:20	Lagtime [600]
	C	0.351	0.311	0.714	0.158	0.19	1.535	1.77	0.321	0.349	0.764	-0.117	0.067	Max V [600]
		0.984	0.952	0.971	0.85	0.858	0.762	0.748	0.989	0.976	0.986	0.876	0.911	R-Squared [600]
		04:59:10	04:29:10	11:29:10	22:59:10	01:29:10	18:29:10	1 day, 6:29:10	04:59:10	06:29:10	19:59:10	2 days, 16:59:10	09:29:10	t at Max V [600]
		03:17:34	02:55:47	09:43:04	20:23:10	00:41:59	17:35:17	1 day, 5:56:48	03:28:57	04:21:49	17:03:32	2 days, 18:37:03	09:34:52	Lagtime [600]
	D	0.886	0.444	0.351	0.315	0.172	0.199	-1.076	0.418	0.3	0.363	0.261	0.144	Max V [600]
		0.908	0.923	0.985	1	0.903	0.569	0.493	0.93	0.983	0.998	0.845	0.759	R-Squared [600]
		04:29:10	04:29:10	08:29:10	1 day, 4:59:10	03:29:10	19:29:10	1 day, 21:59:10	04:59:10	05:59:10	12:29:10	01:29:10	01:29:10	t at Max V [600]
		03:25:12	03:21:07	05:39:39	23:51:44	03:24:44	17:17:06	1 day, 22:51:46	03:29:52	04:08:06	08:35:20	00:45:56	00:31:24	Lagtime [600]
	E	0.969	0.528	0.417	0.372	0.41	0.871	0.649	0.45	0.341	0.331	0.214	-0.147	Max V [600]
		0.849	0.905	0.989	1	0.977	0.78	0.508	0.931	0.952	0.999	0.741	0.858	R-Squared [600]
		04:29:10	04:29:10	08:29:10	1 day, 5:59:10	02:59:10	06:59:10	1 day, 16:29:10	04:29:10	05:59:10	11:59:10	01:29:10	02:29:10	t at Max V [600]
		03:27:24	03:12:25	05:48:46	1 day, 0:53:15	02:26:55	06:18:29	1 day, 15:24:12	03:28:19	04:13:28	08:21:28	00:53:56	04:05:46	Lagtime [600]
	F	0.955	0.471	0.416	0.397	0.276	0.844	0.592	0.426	0.344	0.34	0.362	0.148	Max V [600]
		0.896	0.876	0.98	0.999	0.917	0.751	0.546	0.934	0.956	0.997	0.943	0.647	R-Squared [600]
		04:29:10	04:29:10	08:59:10	1 day, 6:29:10	02:29:10	15:59:10	2 days, 18:29:10	04:59:10	05:59:10	12:59:10	01:29:10	01:29:10	t at Max V [600]
		03:30:52	03:16:54	05:41:06	1 day, 0:56:39	02:12:40	14:55:04	2 days, 17:21:24	03:26:58	04:16:09	08:39:57	00:36:58	?????	Lagtime [600]
	G	0.004	0.003	0.137	0.019	0.037	0.062	0.132	0.012	0.008	-0.004	0.004	-0.009	Max V [600]
		0.813	0.521	0.711	0.994	0.958	0.993	0.666	0.953	0.787	0.945	0.75	0.763	R-Squared [600]
		01:29:10	01:29:10	05:29:10	01:29:10	01:29:10	01:29:10	2 days, 4:29:10	02:59:10	2 days, 3:29:10	1 day, 12:29:10	01:29:10	01:29:10	t at Max V [600]
		?????	?????	04:26:24	00:30:13	?????	?????	2 days, 0:21:25	00:54:10	1 day, 23:52:39	1 day, 16:56:26	?????	?????	Lagtime [600]
	H	0.003	0.004	-0.02	0.081	0.034	0.061	-0.122	-0.01	0.009	0.006	-0.006	-0.006	Max V [600]
		0.81	0.797	0.975	0.719	0.983	0.992	0.891	0.947	0.929	0.921	0.688	0.835	R-Squared [600]
		01:29:10	01:29:10	2 days, 9:59:10	01:29:10	01:29:10	01:29:10	1 day, 21:29:10	02:29:10	2 days, 3:29:10	03:59:10	1 day, 15:29:10	1 day, 4:29:10	t at Max V [600]
		?????	?????	2 days, 16:23:34	?????	?????	?????	2 days, 1:43:45	01:39:31	1 day, 23:52:15	02:46:32	1 day, 19:00:56	1 day, 8:59:10	Lagtime [600]
[truncated: 49 more columns]
