# Supplementary material for: Bacterial survival in microscopic surface wetness
Source: eLife journal article supplement (doi:10.7554/elife.48508), 2019-10-14
Supplement: supp [file elife_poa_e48508_Supplementary_file_2.docx]

| Condition | Growth Rate | R | Max OD | Doubling time [min]  (Mean±SD) | Lag time [hours] |
| --- | --- | --- | --- | --- | --- |
| A506 M9-salts x2 | 0.0077 | 0.9994 | 0.2812 | 90 ± 2 | 3 |
| A506 M9-salts x1 | 0.0090 | 0.9962 | 0.3049 | 78 ± 4 | 3 |
| A506 M9-salts 5x | 0.0082 | 0.9922 | 0.4234 | 85 ± 7 | 10 |
| A506 M9-salts 10x | 0.0005 | 0.9934 | 0.0542 | 1490 ± 81 | 1 |
| A506 M9-salts 20x | NA | NA | 0.0339 | NA | NA |
| A506 NaCl 10mM | 0.0100 | 0.9906 | 0.2616 | 69 ± 6 | 5 |
| A506 NaCl 100mM | 0.0072 | 0.9967 | 0.4216 | 96 ± 4 | 5 |
| A506 NaCl 500mM | 0.0050 | 0.9985 | 0.4572 | 139 ± 4 | 17 |
| A506 NaCl 1000mM | 0.0017 | 0.9991 | 0.0649 | 403 ± 9 | 16 |
| A506 NaCl 2000mM | NA | NA | 0.0276 | NA | NA |
| KT2440 M9-salts x2 | 0.0193 | 0.9838* | 0.2826 | 36 ± 4 | 4 |
| KT2440 M9-salts x1 | 0.0150 | 0.9891* | 0.1859 | 47 ± 4 | 4 |
| KT2440 M9-salts 5x | 0.0045 | 0.9978 | 0.2672 | 154 ± 5 | 6 |
| KT2440 M9-salts 10x | 0.0033 | 0.9993 | 0.3689 | 210 ± 4 | 26 |
| KT2440 M9-salts 20x | NA | NA | 0.0472 | NA | NA |
| KT2440 NaCl 10mM | 0.0089 | 0.9993 | 0.1849 | 79 ± 2 | 5 |
| KT2440 NaCl 100mM | 0.0087 | 0.9970 | 0.1902 | 80 ± 4 | 5 |
| KT2440 NaCl 500mM | 0.0039 | 0.9995 | 0.3102 | 180 ± 3 | 10 |
| KT2440 NaCl 1000mM | 0.0023 | 0.9985 | 0.2089 | 311 ± 7 | 46 |
| KT2440 NaCl 2000mM | NA | NA | 0.0372 | NA | NA |

**Supplementary Table 2. Growth curve analysis of *P. fluorescens* A506 and *P. putida* KT2440 at different M9 concentrations and NaCl concentrations.** Plate Reader (Synergy™ H1, BioTek™) screen results were analyzed using GrowthRate and GRplot programs (Mira, P., M. Barlow, and B. G. Hall. Statistical Package for Growth Rates Made Easy. Mol. Biol. Evol. 34:3303-3309, 2017). Results of zero growth were omitted from this table. In both strains, the general picture was that higher salt concentrations led to a decrease in growth rate, a decrease in final OD, and an increase in lag time. ‘*’: R is lower than 0.99.
